# Supplementary material for: Mass Spectrometry-Based Proteomic Characterization of Cutaneous Melanoma Ectosomes Reveals the Presence of Cancer-Related Molecules
Source: MDPI journal article supplement (doi:10.3390/ijms21082934), 2020-04-22
Supplement: s1 [file s1]

**Supplementary Data 2 - Interaction diagrams concerning differential proteins identified in ectosomes derived from different cutaneous melanoma cell lines**

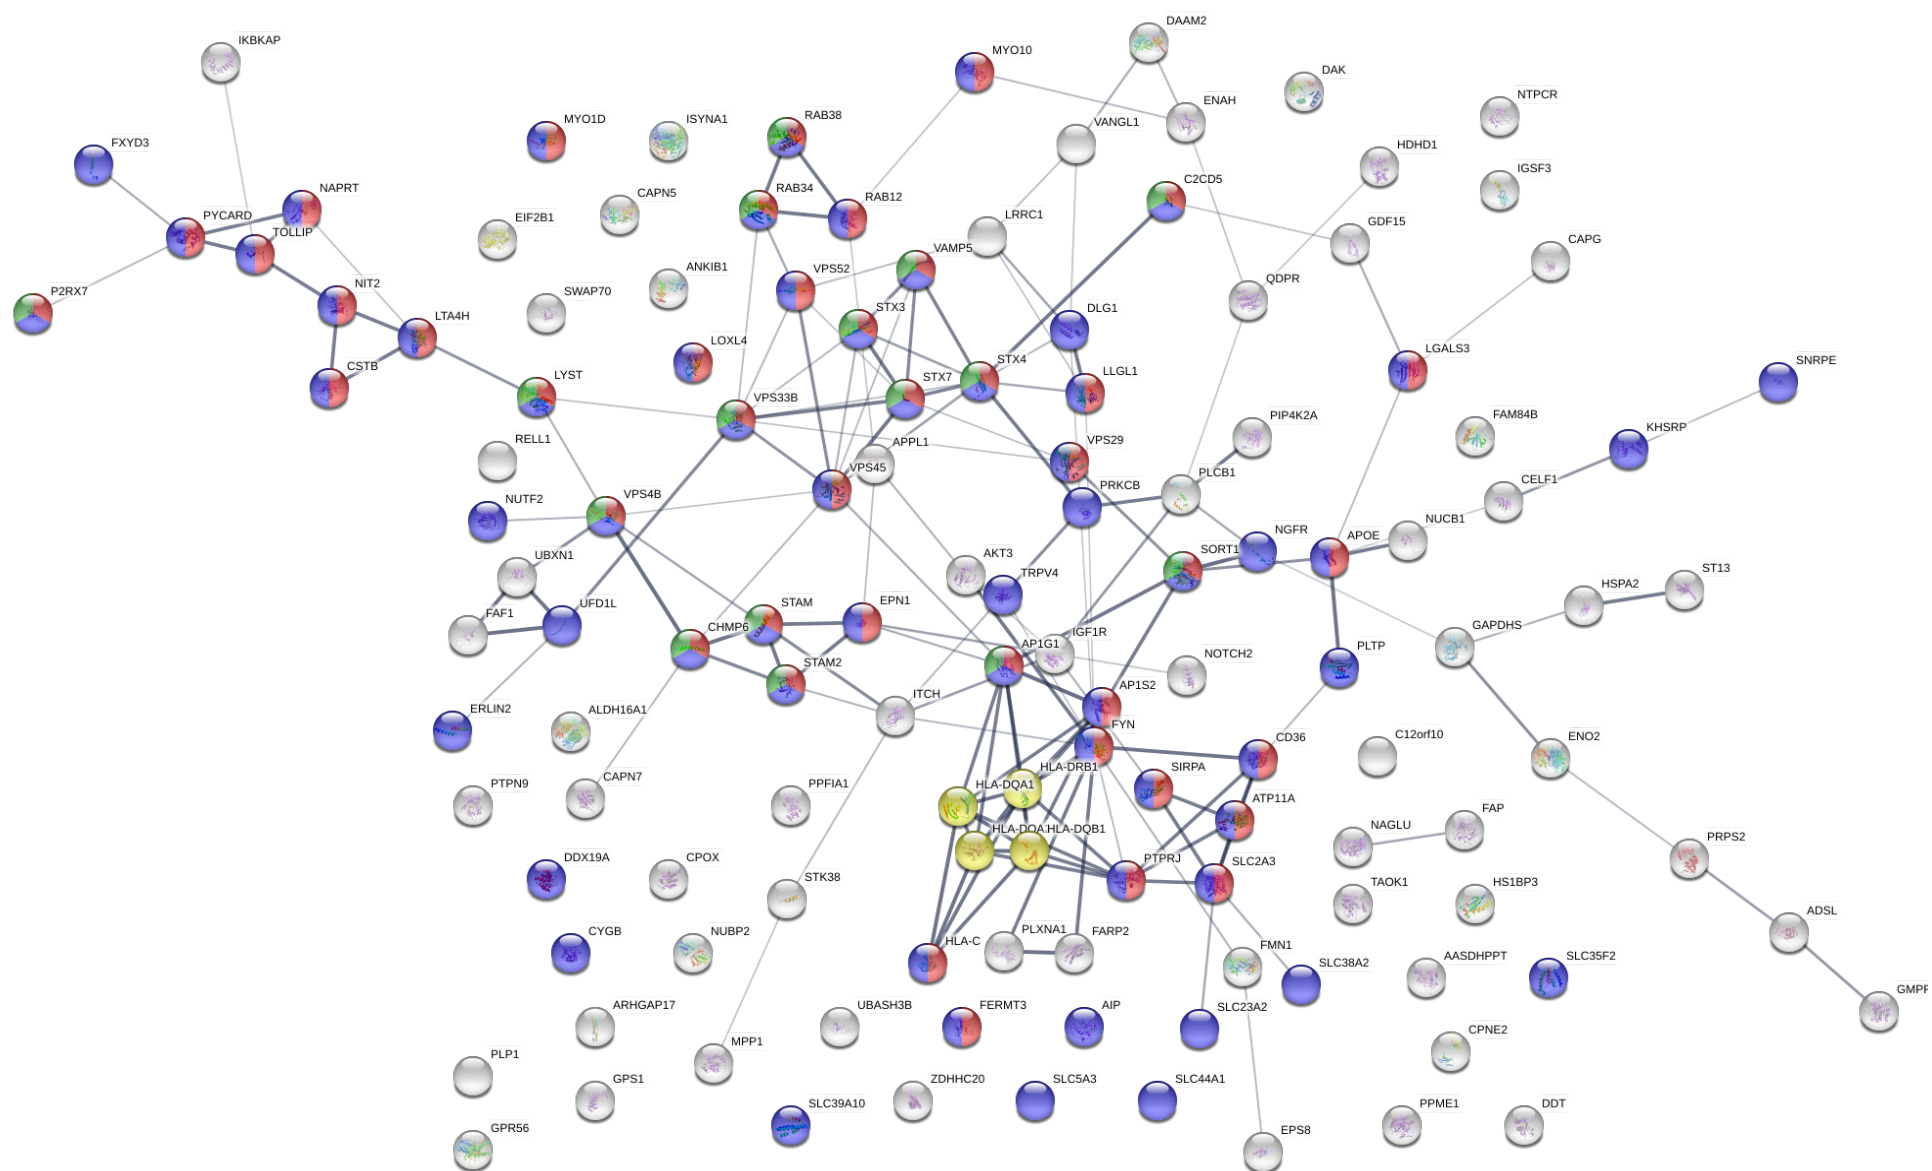

### Figure S1

**Figure S1** Proteins unique for WM115 ectosomes in comparison to WM973 ectosomes (this means proteins identified in both biological replicates of WM115 ectosomes with at least 2 unique peptides but not found in any WM973 samples). Red colour corresponds to the enriched Gene Ontology term GO:0016192 - vesicle-mediated transport (False Discovery Rate (FDR)= $1.16^{-10}$ , 42 proteins), blue to GO:0006810 - transport (FDR= $2.87^{-8}$ , 62 proteins), green to GO:0016050 - vesicle organisation (FDR= $5.46^{-7}$ , 16 proteins), and yellow to GO:0032395 - MHC class II receptor activity (FDR=0.001, 4 proteins).

**PROTEIN ABBREVIATION, protein full name, UNIPROT ID;** AASDHPPT - L-aminoadipate-semialdehyde dehydrogenase-phosphopantetheinyl transferase, Q9NRN7; ADSL - Adenylosuccinate lyase, P30566; AIP - AH receptor-interacting protein, O00170; AKT3 - RAC-gamma serine/threonine-protein kinase, Q9Y243; ALDH16A1 - Aldehyde dehydrogenase 16 family member A1 Q8IZ83; ANKIB1 - Ankyrin repeat and IBR domain-containing protein 1, Q9P2G1; APIG1 - AP-1 complex subunit gamma-1, O43747; AP1S2 - AP-1 complex subunit sigma-2, P56377; APOE - Apolipoprotein E, P02649; APPL1 - DCC-interacting protein 13-alpha, Q9UKG1; ARHGAP17 - Rho GTPase-activating protein 17, Q68EM7; ATP11A - Probable phospholipid-transporting ATPase 1H, P98196; C12orf10 - UPF0160 protein MYG1, mitochondrial, Q9HB07; C2CD5 - C2 domain-containing protein 5, Q86YS7; CAPG - Macrophage-capping protein, P40121; CAPN5 - Calpain-5, O15484; CAPN7 - Calpain-7, Q9Y6W3; CD36 - Platelet glycoprotein 4, P16671; CELF1 - CUGBP Elav-like family member 1, Q92879; CHMP6 - Charged multivesicular body protein 6, Q96FZ7; CPNE2 - Copine-2, Q96FN4; CPOX - Oxygen-dependent coproporphyrinogen-III oxidase, mitochondrial, P36551; CSTB - Cystatin-B, P04080; CYGB - Cytoglobin, Q8WWM9; DAAM2 - Dishevelled associated activator of morphogenesis 2, Q86T65; DAK - Triokinase/FMN cyclase, Q3LXA3; DDT - D-dopachrome decarboxylase, P30046; DDX19A - ATP-dependent RNA helicase DDX19A, Q9NUU7; DLG1 - Disks large homolog 1, Q12959; EIF2B1 - Translation initiation factor eIF-2B subunit alpha, Q14232; ENAH - Protein enabled homolog, Q8N8S7; ENO2 - Gamma-enolase, P09104; EPN1 - Epsin-1, Q9Y6I3; EPS8 - Epidermal growth factor receptor kinase substrate 8, Q12929; ERLIN2 - Erlin-2, O94905; FAF1 - FAS-associated factor 1, Q9UNN5; FAM84B - Protein FAM84B, Q96KN1; FAP - Prolyl endopeptidase FAP, Q12884; FARP2 - FERM, ARHGEF and pleckstrin domain-containing protein 2, O94887; FERMT3 - Fermitin family homolog 3, Q86UX7; FMN1 - Formin-1, Q68DA7; FXD3 - FXD domain-containing ion transport regulator 3, Q14802; FYN - Tyrosine-protein kinase Fyn, P06241; GAPDHS - Glyceraldehyde-3-phosphate dehydrogenase, testis-specific, O14556; GDF15 - Growth differentiation factor 15, Q99988; GMPR - GMP reductase 1, P36959; GPR56 - Adhesion G-protein coupled receptor G1, Q9Y653; GPS1 - COP9 signalosome complex subunit 1, Q13098; HDHD1 - Pseudouridine-5-phosphatase, Q08623; HLA-C - HLA class I histocompatibility antigen, Cw-7 alpha chain, P10321; HLA-DQA1 - Major histocompatibility complex, class II, DQ alpha 1, P01909; HLA-DQA2 - HLA class II histocompatibility antigen, DQ alpha 2 chain, P01906; HLA-DQB1 - HLA class II histocompatibility antigen, DQ beta 1 chain, P01920; HLA-DRB1 - HLA class II histocompatibility antigen, DRB1-15 beta chain, P13761; HS1BP3 - HCLS1-binding protein 3, Q53T59; HSPA2 - Heat shock-related 70 kDa protein 2, P54652; IGF1R - Insulin-like growth factor 1 receptor, P08069; IGSF3 - Immunoglobulin superfamily member 3, O75054; IKBKAP - Elongator complex protein 1, O95163; ISYNA1 - Inositol-3-phosphate synthase 1, Q9NPH2; ITCH - E3 ubiquitin-protein ligase Itchy homolog, Q96J02; KHSRP - Far upstream element-binding protein 2, Q92945; LGALS3 - Galectin-3, P17931; LLGL1 - Lethal(2) giant larvae protein homolog 1, Q15334; LOXL4 - Lysyl oxidase homolog 4, Q96JB6; LRRC1 - Leucine-rich repeat-containing protein 1, Q9BTT6; LTA4H - Leukotriene A-4 hydrolase, P09960; LYST - Lysosomal-trafficking regulator, Q99698; MPP1 - 55 kDa erythrocyte membrane protein, Q00013; MYO10 - Unconventional myosin-X, Q9HD67; MYO1D - Unconventional myosin-Id, O94832; NAGLU - Alpha-N-acetylglucosaminidase, P54802; NAPRT - Nicotinate phosphoribosyltransferase, Q6XQN6; NGFR - Tumor necrosis factor receptor superfamily member 16, P08138; NIT2 - Omega-amidase NIT2, Q9NQR4; NOTCH2 - Neurogenic locus notch homolog protein 2, Q04721; NTPCR - Cancer-related nucleoside-triphosphatase, Q9BSD7; NUBP2 - Cytosolic Fe-S cluster assembly factor NUBP2, Q9Y5Y2; NUCB1 - Nucleobindin-1, Q02818; NUTF2 - Nuclear transport factor 2, P61970; P2RX7 - P2X purinoceptor 7, Q99572; PIP4K2A - Phosphatidylinositol 5-phosphate 4-kinase type-2 alpha, P48426; PLCB1 - 1-phosphatidylinositol 4,5-bisphosphate phosphodiesterase beta-1, Q9NQ66; PLP1 - Myelin proteolipid protein, P60201; PLTP - Phospholipid transfer protein, P55058; PLXNA1 - Plexin-A1, Q9UIW2; PPIA1 - Liprin-alpha-1, Q13136; PPME1 - Protein phosphatase methylesterase 1, Q9Y570; PRKCB - Protein kinase C beta type, P05771; PRPS2 - Ribose-phosphate pyrophosphokinase 2, P11908; PTPN9 - Tyrosine-protein phosphatase non-receptor type 9, P43378; PTPRJ - Receptor-type tyrosine-protein phosphatase eta, Q12913; PYCARD - Apoptosis-associated speck-like protein containing a CARD, Q9ULZ3; QDPR - Dihydropteridine reductase, P09417; RAB12 - Ras-related protein Rab-12, Q6IQ22; RAB34 - Ras-related protein Rab-34, Q9BZG1; RAB38 - Ras-related protein Rab-38, P57729; RELL1 - RELT-like protein 1, Q8IUW5; SIRPA - Tyrosine-protein phosphatase non-receptor type substrate 1, P78324; SLC23A2 - Solute carrier family 23 member 2, Q9UGH3; SLC2A3 - Solute carrier family 2, facilitated glucose transporter member 3, P11169; SLC35F2 - Solute carrier family 35 member F2, Q8IXU6; SLC38A2 - Sodium-coupled neutral amino acid transporter 2, Q96QD8; SLC39A10 - Zinc transporter ZIP10, Q9ULF5; SLC44A1 - Choline transporter-like protein 1, Q8WWI5; SLC5A3 - Sodium/myo-inositol cotransporter, P53794; SNRPE - Small nuclear ribonucleoprotein E, P62304; SORT1 - Sortilin, Q99523; ST13 - Hsc70-interacting protein, P50502; STAM - Signal transducing adapter molecule 1, Q92783; STAM2 - Signal transducing adapter molecule 2, O75886; STK38 - Serine/threonine-protein kinase 38, Q15208; STX3 - Syntaxin-3, Q13277; STX4 - Syntaxin-4, Q12846; STX7 - Syntaxin-7, O15400; SWAP70 - Switch-associated protein 70, Q9UH65; TAOK1 - Serine/threonine-protein kinase TAO1, Q7L7X3; TOLLIP - Toll-interacting protein, Q9H0E2; TRPV4 - Transient receptor potential cation channel subfamily V member 4, Q9HBA0; UBASH3B - Ubiquitin-associated and SH3 domain-containing protein B, Q8TF42; UBXN1 - UBX domain-containing protein 1, Q04323; UFD1L - Ubiquitin recognition factor in ER-associated degradation protein 1, Q92890; VAMP5 - Vesicle-associated membrane protein 5, O95183; VANGL1 - VANGL planar cell polarity protein 1 Q8TAA9; VPS29 - Vacuolar protein sorting-associated protein 29, Q9UBQ0; VPS33B - Vacuolar protein sorting-associated protein 33B, Q9H267; VPS45 - Vacuolar protein sorting-associated protein 45, Q9NRW7; VPS4B - Vacuolar protein sorting-associated protein 4B, O75351; VPS52 - Vacuolar protein sorting-associated protein 52 homolog, Q8N1B4; ZDHHC20 - Probable palmitoyltransferase ZDHHC20, Q5W0Z9

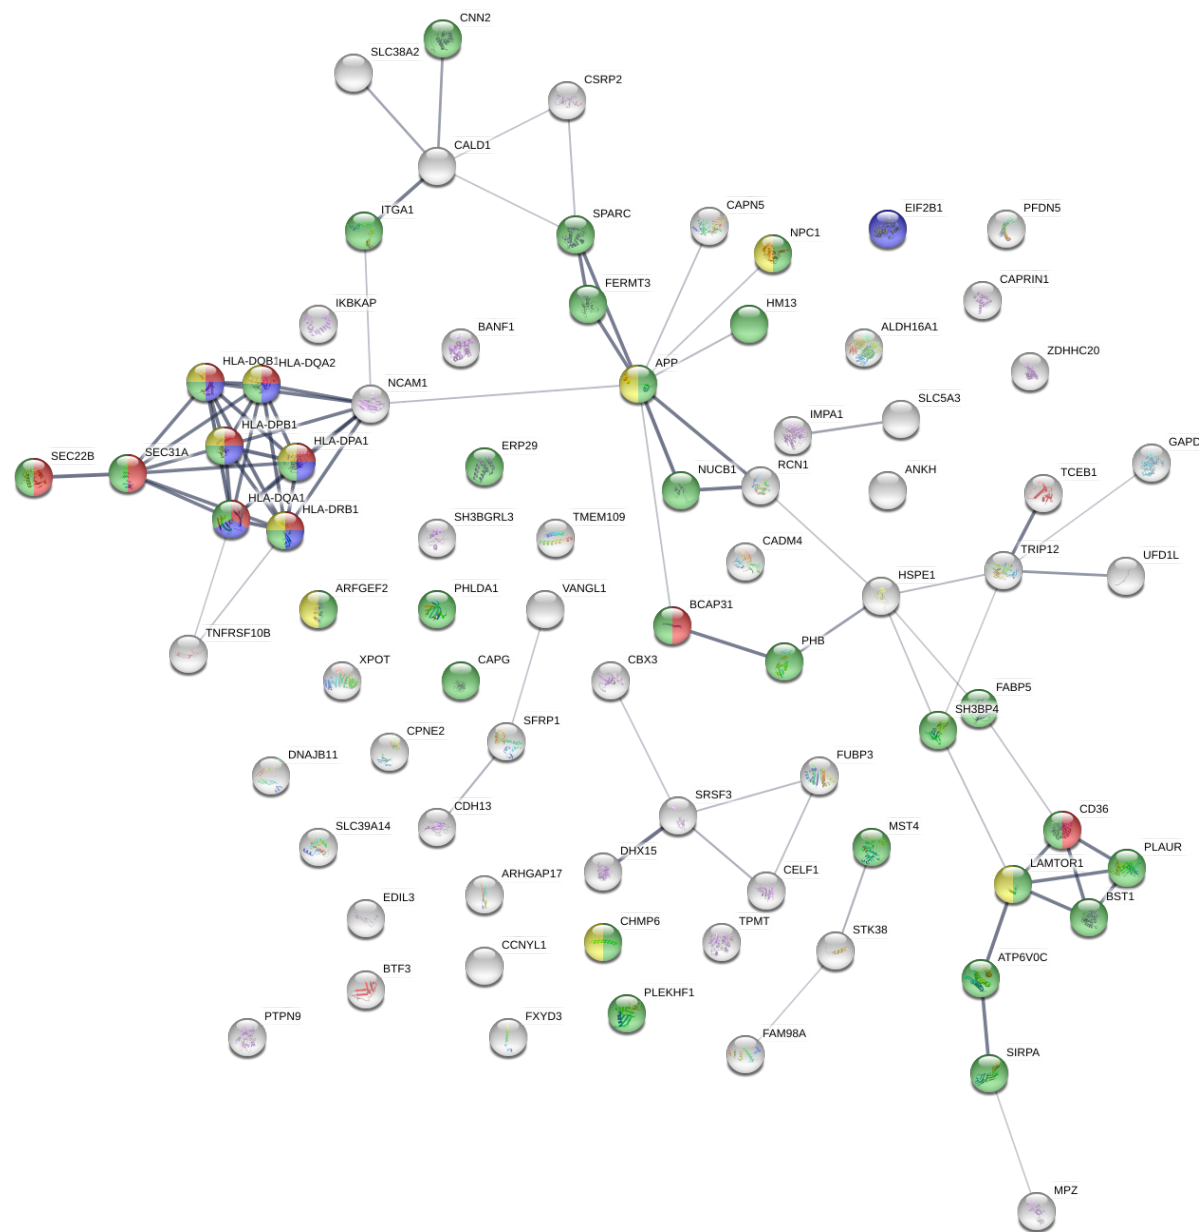

Figure S2

**Figure S2** Proteins unique for WM115 ectosomes in comparison to WM266 ectosomes (this means proteins identified in both biological replicates of WM115 exosomes with at least 2 unique peptides but not found in any WM266-4 samples). Red colour corresponds to the enriched GO term GO:0048002 - antigen processing and presentation of peptide antigen (FDR=6.86<sup>-7</sup>, 10 proteins), blue to GO:00050852 - T cell receptor signalling pathway (FDR=6.34<sup>-5</sup>, 7 proteins), green to GO:0031410 - cytoplasmic vesicle (FDR=7.69<sup>-10</sup>, 33 proteins), and yellow to GO:00057680 - endosome (FDR=0.0038, 10 proteins).

**PROTEIN ABBREVIATION, protein full name, UNIPROT ID;** ALDH16A1 - Aldehyde dehydrogenase 16 family member A1 Q8IZ83; ANKH - Progressive ankylosis protein homolog, Q9HCJ1; APP - Amyloid-beta A4 protein, P05067; ARFGEF2 - Brefeldin A-inhibited guanine nucleotide-exchange protein 2, Q9Y6D5; ARHGAP17 - Rho GTPase-activating protein 17, Q68EM7; ATP6V0C - V-type proton ATPase 16 kDa proteolipid subunit, P27449; BANF1 - Barrier-to-autointegration factor, O75531; BCAP31 - B-cell receptor-associated protein 31, P51572; BST1 - ADP-ribosyl cyclase/cyclic ADP-ribose hydrolase 2, Q10588; BTF3 - Transcription factor BTF3, P20290; CADM4 - Cell adhesion molecule 4, Q8NFZ8; CALD1 - Caldesmon, Q05682; CAPG - Macrophage-capping protein, P40121; CAPN5 - Calpain-5, O15484; CAPRIN1 - Caprin-1, Q14444; CBX3 - Chromobox protein homolog 3, Q13185; CCNYL1 - Cyclin-Y-like protein 1, Q8N7R7; CD36 - Platelet glycoprotein 4, P16671; CDH13 - Cadherin-13, P55290; CELF1 - CUGBP Elav-like family member 1, Q92879; CHMP6 - Charged multivesicular body protein 6, Q96FZ7; CNN2 - Calponin-2, Q99439; CPNE2 - Copine-2, Q96FN4; CSRP2 - Cysteine and glycine-rich protein 2, Q16527; DHX15 - Pre-mRNA-splicing factor ATP-dependent RNA helicase DHX15, O43143; DNAJB11 - DnaJ homolog subfamily B member 11, Q9UBS4; EDIL3 - EGF-like repeat and discoidin I-like domain-containing protein 3, O43854; EIF2B1 - Translation initiation factor eIF-2B subunit alpha, Q14232; ERP29 - Endoplasmic reticulum resident protein 29, P30040; FABP5 - Fatty acid-binding protein, epidermal, Q01469; FAM98A - Protein FAM98A, Q8NCA5; FERMT3 - Fermitin family homolog 3, Q86UX7; FUBP3 - Far upstream element-binding protein 3, Q96I24; FXYD3 - FXYD domain-containing ion transport regulator 3, Q14802; GAPDHS - Glyceraldehyde-3-phosphate dehydrogenase, testis-specific, O14556; HLA-DPA1 - HLA class II histocompatibility antigen, DP alpha 1 chain, P20036; HLA-DPB1 - HLA class II histocompatibility antigen, DP beta 1 chain, P04440; HLA-DQA1 - Major histocompatibility complex, class II, DQ alpha 1, P01909; HLA-DQA2 - HLA class II histocompatibility antigen, DQ alpha 2 chain, P01906; HLA-DQB1 - HLA class II histocompatibility antigen, DQ beta 1 chain, P01920; HLA-DRB1 - HLA class II histocompatibility antigen, DRB1-15 beta chain, P20039; HM13 - Histocompatibility minor 13 Q8TCT9; HSPE1 - 10 kDa heat shock protein, mitochondrial, P61604; IKBKAP - Elongator complex protein 1, O95163; IMPA1 - Inositol monophosphatase 1, P29218; ITGA1 - Integrin alpha-1, P56199; LAMTOR1 - Ragulator complex protein LAMTOR1, Q6IAA8; MPZ - Myelin protein P0, P25189; MST4 - Serine/threonine-protein kinase 26, Q9P289; NCAM1 - Neural cell adhesion molecule 1, P13591; NPC1 - Niemann-Pick C1 protein, O15118; NUCB1 - Nucleobindin-1, Q02818; PFDN5 - Prefoldin subunit 5, Q99471; PHB - Prohibitin, P35232; PHLDA1 - Pleckstrin homology-like domain family A member 1, Q8WV24; PLAUR - Urokinase plasminogen activator surface receptor, Q03405; PLEKHF1 - Pleckstrin homology domain-containing family F member 1, Q96S99; PTPN9 - Tyrosine-protein phosphatase non-receptor type 9, P43378; RCN1 - Reticulocalbin-1, Q15293; SEC22B - Vesicle-trafficking protein SEC22b, O75396; SEC31A - Protein transport protein Sec31A, O94979; SFRP1 - Secreted frizzled-related protein 1, Q8N474; SH3BGR13 - SH3 domain-binding glutamic acid-rich-like protein 3, Q9H299; SH3BP4 - SH3 domain-binding protein 4, Q9P0V3; SIRPA - Tyrosine-protein phosphatase non-receptor type substrate 1, P78324; SLC38A2 - Sodium-coupled neutral amino acid transporter 2, Q96QD8; SLC39A14 - Zinc transporter ZIP14, Q15043; SLC5A3 - Sodium/myo-inositol cotransporter, P53794; SPARC - SPARC, P09486; SRSF3 - Serine/arginine-rich splicing factor 3, P84103; STK38 - Serine/threonine-protein kinase 38, Q15208; TCEB1 - Elongin-C, Q15369; TMEM109 - Transmembrane protein 109, Q9BVC6; TNFRSF10B - Tumor necrosis factor receptor superfamily member 10B, O14763; TPMT - Thiopurine S-methyltransferase, P51580; TRIP12 - E3 ubiquitin-protein ligase TRIP12, Q14669; UFD1L - Ubiquitin recognition factor in ER-associated degradation protein 1, Q92890; VANGL1 - VANGL planar cell polarity protein 1 Q8TAA9; XPOT - Exportin-T, O43592; ZDHHC20 - Probable palmitoyltransferase ZDHHC20, Q5W0Z9

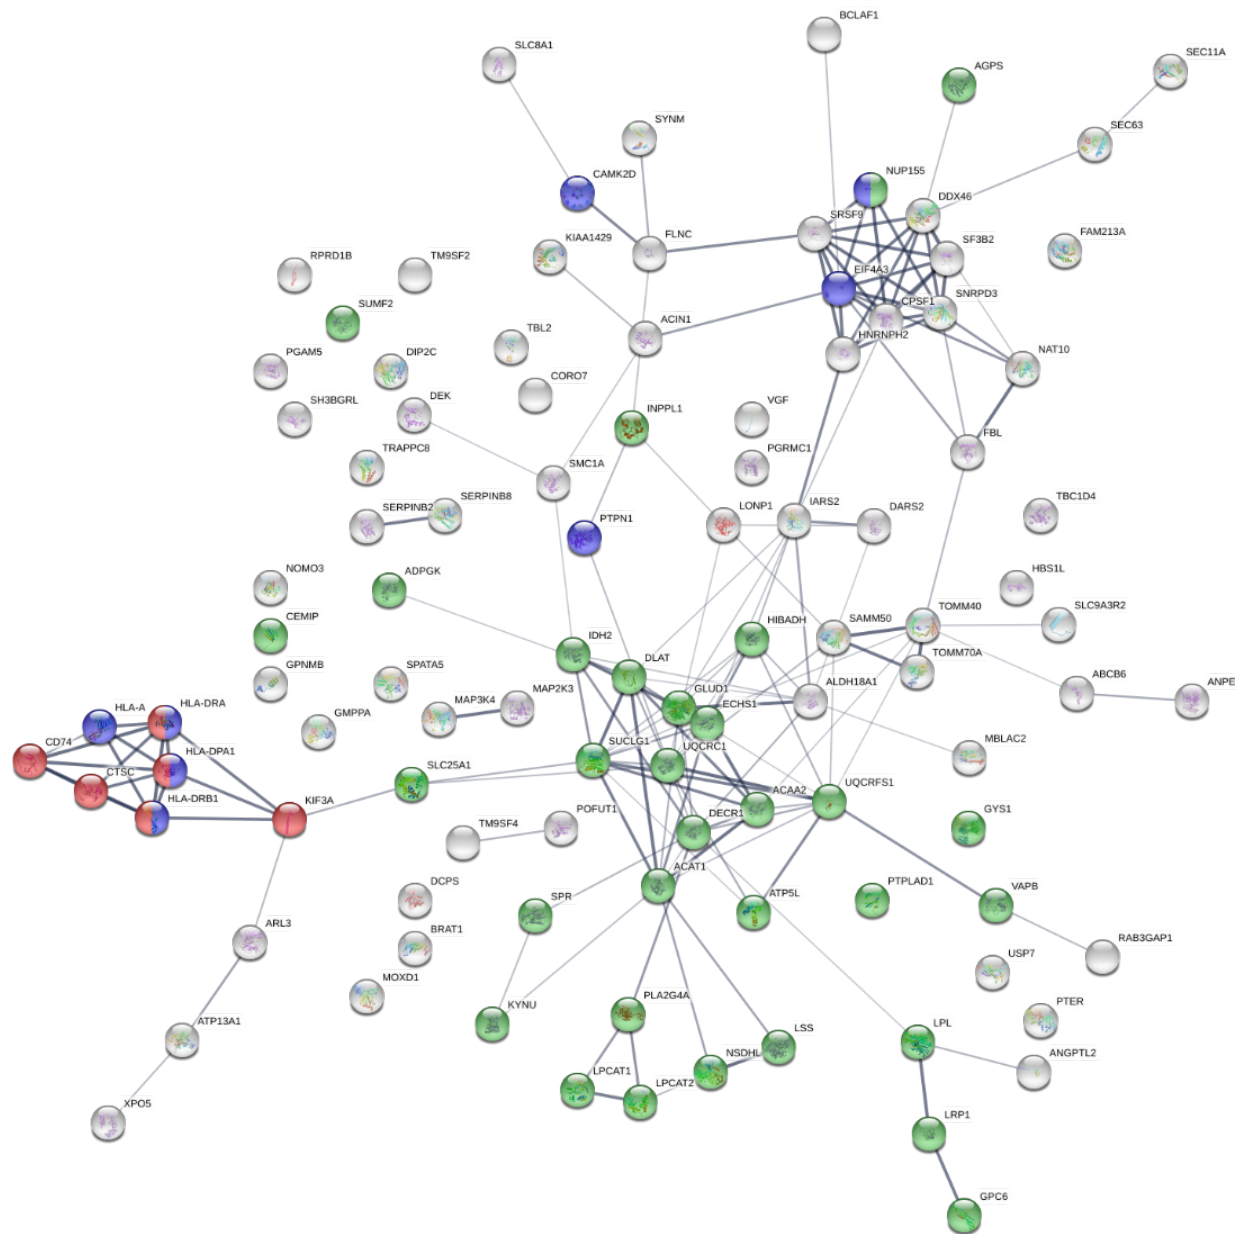

Figure S3

**Figure S3** Proteins unique for WM793 ectosomes in comparison to WM1205Lu ectosomes (this means proteins identified in both biological replicates of WM793 ectosomes with at least 2 unique peptides but not found in any WM1205Lu samples). Red colour corresponds to the enriched GO term: GO:0032395 – MHC class II antigen presentation (FDR=0.0035, 6 proteins), blue to GO:0060333 - Interferon signaling (FDR=0.0015, 8 proteins), and green to GO:1430728 - metabolism (FDR=4.83<sup>-6</sup>, 32 proteins).

**PROTEIN ABBREVIATION, protein full name, UNIPROT ID;** ABCB6 - ATP-binding cassette sub-family B member 6, mitochondrial, Q9NP58; ACAA2 - 3-ketoacyl-CoA thiolase, mitochondrial, P42765; ACAT1 - Acetyl-CoA acetyltransferase, mitochondrial, P24752; ACIN1 - Apoptotic chromatin condensation inducer in the nucleus, Q9UKV3; AGPS - Alkylldihydroxyacetonephosphate synthase, peroxisomal, O00116; ALDH18A1 - Delta-1-pyrroline-5-carboxylate synthase, P54886; ANGPTL2 - Angiopoietin-related protein 2, Q9UKU9; ANPEP - Aminopeptidase N, P15144; ARL3 - ADP-ribosylation factor-like protein 3, P36405; ATP13A1 - Manganese-transporting ATPase 13A1, Q9HD20; ATP5L - ATP synthase subunit g, mitochondrial, O75964; BRAT1 - BRCA1-associated ATM activator 1, Q6PJG6; CAMK2D - Calcium/calmodulin-dependent protein kinase type II subunit delta, Q13557; CD74 - HLA class II histocompatibility antigen gamma chain, P04233; CEMIP - Cell migration-inducing and hyaluronan-binding protein, Q8WUJ3; CORO7 - Coronin-7, P57737; CPSF1 - Cleavage and polyadenylation specificity factor subunit 1, Q10570; CTSC - Dipeptidyl peptidase 1, P53634; DARS2 - Aspartate--tRNA ligase, mitochondrial, Q6PI48; DCPS - m7GpppX diphosphatase, Q96C86; DDX46 - Probable ATP-dependent RNA helicase DDX46, Q7L014; DECR1 - 2,4-dienoyl-CoA reductase, mitochondrial, Q16698; DEK - Protein DEK, P35659; DIP2C - Disco interacting protein 2 homolog C Q9Y2E4; DLAT - Dihydrolipoamide S-acetyltransferase, P10515; ECHS1 - Enoyl-CoA hydratase, mitochondrial, P30084; EIF4A3 - Eukaryotic initiation factor 4A-III, P38919; FAM213A - Redox-regulatory protein FAM213A, Q9BRX8; FBL - rRNA 2-O-methyltransferase fibrillar, P22087; FLNC - Filamin-C, Q14315; GLUD1 - Glutamate dehydrogenase 1, mitochondrial, P00367; GMPPA - Mannose-1-phosphate guanylttransferase alpha, Q96IJ6; GPC6 - Glypican-6, Q9Y625; GPNMB - Transmembrane glycoprotein NMB, Q14956; GYS1 - Glycogen synthase, muscle, P13807; HBS1L - HBS1-like protein, Q9Y450; HIBADH - 3-hydroxyisobutyrate dehydrogenase, mitochondrial, P31937; HLA-A - HLA class I histocompatibility antigen, A-3 alpha chain, P16190; HLA-DPA1 - HLA class II histocompatibility antigen, DP alpha 1 chain, P20036; HLA-DRA - HLA class II histocompatibility antigen, DR alpha chain, P01903; HLA-DRB1 - HLA class II histocompatibility antigen, DRB1-15 beta chain, P01912; HLA-DRB1 - HLA class II histocompatibility antigen, DRB1-15 beta chain, P20039; HLA-DRB1 - HLA class II histocompatibility antigen, DRB1-15 beta chain, Q30134; HNRNP2 - Heterogeneous nuclear ribonucleoprotein H2, P55795; IARS2 - Isoleucine--tRNA ligase, mitochondrial, Q9NSE4; IDH2 - Isocitrate dehydrogenase, mitochondrial, P48735; INPPL1 - Phosphatidylinositol 3,4,5-trisphosphate 5-phosphatase 2, O15357; KIAA1429 - Protein virilizer homolog, Q69YN4; KIF3A - Kinesin-like protein KIF3A, Q9Y496; LONP1 - Lon protease homolog, mitochondrial, P36776; LPCAT2 - Lysophosphatidylcholine acyltransferase 2, Q7L5N7; LPL - Lipoprotein lipase, P06858; LRP1 - Prolow-density lipoprotein receptor-related protein 1, Q07954; LSS - Lanosterol synthase, P48449; MAP2K3 - Dual specificity mitogen-activated protein kinase kinase 3, P46734; MAP3K4 - Mitogen-activated protein kinase kinase kinase 4, Q9Y6R4; MBLAC2 - Metallo-beta-lactamase domain containing 2, Q68D91; MOXD1 - Monooxygenase DBH like 1, Q6UVY6; NAT10 - RNA cytidine acetyltransferase, Q9H0A0; NOD3 - Nodal modulator 3, P69849; NUP155 - Nuclear pore complex protein Nup155, O75694; PGAM5 - Serine/threonine-protein phosphatase PGAM5, mitochondrial, Q96HS1; PGRMC1 - Membrane-associated progesterone receptor component 1, O00264; PLA2G4A - Cytosolic phospholipase A2, P47712; POFUT1 - GDP-fucose protein O-fucosyltransferase 1, Q9H488; PTER - Phosphotriesterase-related protein, Q96BW5; PTPLAD1 - Very-long-chain (3R)-3-hydroxyacyl-CoA dehydratase 3, Q9P035; PTPN1 - Tyrosine-protein phosphatase non-receptor type 1, P18031; Q13242; ENSG00000103426 - Coronin-7, Q15738; SRSF9 - Serine/arginine-rich splicing factor 9, Q16719; NSDHL - Sterol-4-alpha-carboxylate 3-dehydrogenase, decarboxylating, Q8NF37; KYNU - Kynureninase, Q9BRR6; LPCAT1 - Lysophosphatidylcholine acyltransferase 1, Q9NYF8; ADPGK - ADP-dependent glucokinase, Q9Y512; BCLAF1 - Bcl-2-associated transcription factor 1, RAB3GAP1 - Rab3 GTPase-activating protein catalytic subunit, Q15042; RPRD1B - Regulation of nuclear pre-mRNA domain-containing protein 1B, Q9NQG5; SEC11A - Signal peptidase complex catalytic subunit SEC11A, P67812; SEC63 - Translocation protein SEC63 homolog, Q9UGP8; SERPINB2 - Plasminogen activator inhibitor 2, P05120; SERPINB8 - Serpin B8, P50452; SF3B2 - Splicing factor 3B subunit 2, Q13435; SH3BGR1 - SH3 domain-binding glutamic acid-rich-like protein, O75368; SLC25A1 - Tricarboxylate transport protein, mitochondrial, P53007; SLC8A1 - Sodium/calcium exchanger 1, P32418; SLC9A3R2 - Na(+)/H(+) exchange regulatory cofactor NHE-RF2, Q15599; SMC1A - Structural maintenance of chromosomes protein 1A, Q14683; SNRPD3 - Small nuclear ribonucleoprotein Sm D3, P62318; SPATA5 - Spermatogenesis-associated protein 5, Q8NB90; SPR - Sepiapterin reductase, P35270; SUCLG1 - Succinate--CoA ligase subunit alpha, mitochondrial, P53597; SUMF2 - Sulfatase-modifying factor 2, Q8NBJ7; SYNM - Synemin, O15061; TBC1D4 - TBC1 domain family member 4, O60343; TBL2 - Transducin beta-like protein 2, Q9Y4P3; TM9SF2 - Transmembrane 9 superfamily member 2, Q99805; TM9SF4 - Transmembrane 9 superfamily member 4, Q92544; TOMM40 - Mitochondrial import receptor subunit TOM40 homolog, O96008; TOMM70A - Mitochondrial import receptor subunit TOM70, O94826; TRAPPC8 - Trafficking protein particle complex subunit 8, Q9Y2L5; UQCRC1 - Cytochrome b-c1 complex subunit 1, mitochondrial, P31930; UQCRCF1 - Cytochrome b-c1 complex subunit Rieske, mitochondrial, P47985; USP7 - Ubiquitin carboxyl-terminal hydrolase 7, Q93009; VAPB - Vesicle-associated membrane protein-associated protein B/C, O95292; VGF - Neurosecretory protein VGF, O15240; XPO5 - Exportin-5, Q9HAV4

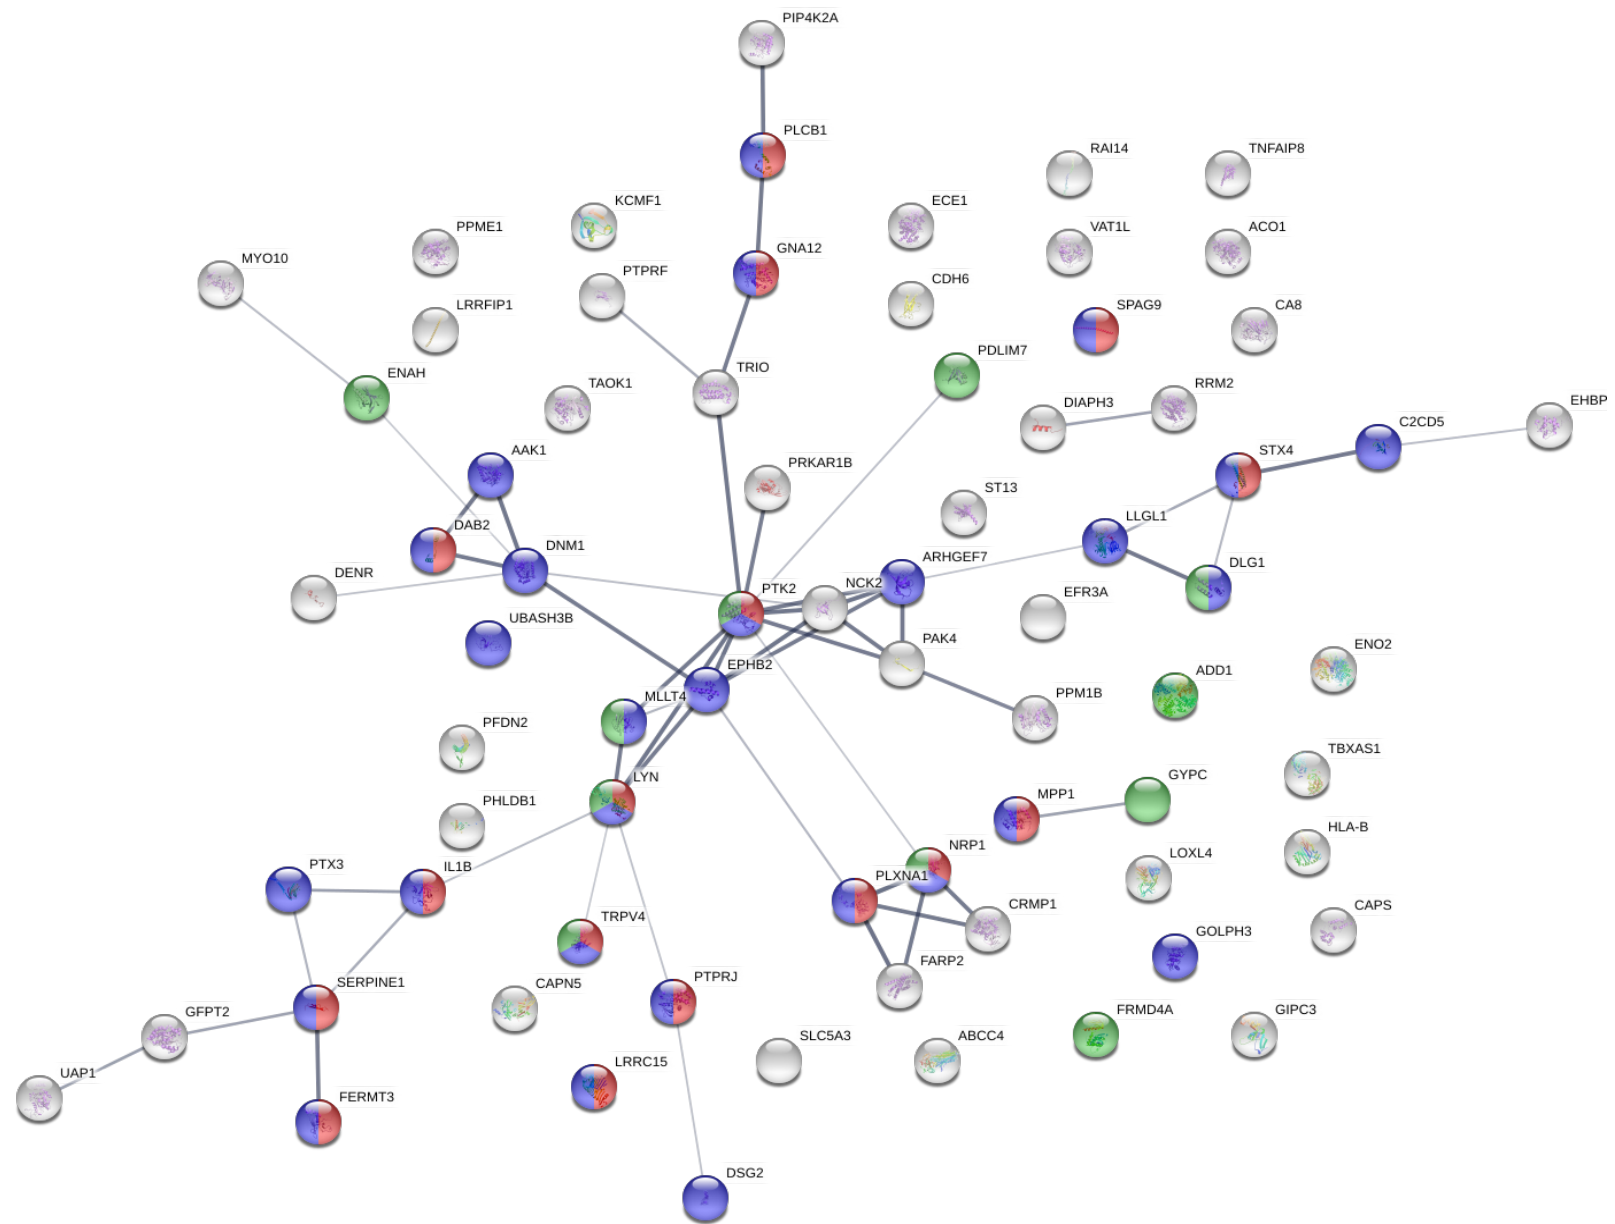

**Figure S4**

**Figure S4** Proteins uniquely found in WM1205Lu ectosomes in comparison to WM973 ectosomes (this means proteins identified in both biological replicates of WM1205Lu ectosomes with at least 2 unique peptides but not found in any WM973 samples). Red colour corresponds to the enriched GO term GO:0030334 - regulation of cell migration (FDR=1.45<sup>-5</sup>, 16 proteins), blue to GO:00032879 - regulation of localization (FDR=2.73<sup>-5</sup>, 28 proteins), and green to GO:0005912 - adherens junction (FDR=5.27<sup>-7</sup>, 11 proteins).

**PROTEIN ABBREVIATION, protein full name, UNIPROT ID;** AAK1 - AP2-associated protein kinase 1, Q2M2I8; ABCC4 - Multidrug resistance-associated protein 4, O15439; ACO1 - Cytoplasmic aconitate hydratase, P21399; ADD1 - Alpha-adducin, P35611; ARHGEF7 - Rho guanine nucleotide exchange factor 7, Q14155; C2CD5 - C2 domain-containing protein 5, Q86YS7; CA8 - Carbonic anhydrase-related protein, P35219; CAPN5 - Calpain-5, O15484; CAPS - Calcyphosin, Q13938; CDH6 - Cadherin-6, P55285; CRMP1 - Dihydropyrimidinase-related protein 1, Q14194; DAB2 - Disabled homolog 2, P98082; DENR - Density-regulated protein, O43583; DIAPH3 - Protein diaphanous homolog 3, Q9NSV4; DLG1 - Disks large homolog 1, Q12959; DNMI - Dynamin-1, Q05193; DSG2 - Desmoglein-2, Q14126; ECE1 - Endothelin-converting enzyme 1, P42892; EFR3A - Protein EFR3 homolog A, Q14156; EHBP1 - EH domain-binding protein 1, Q8NDI1; ENAH - Protein enabled homolog, Q8N8S7; ENO2 - Gamma-enolase, P09104; EPHB2 - Ephrin type-B receptor 2, P29323; FARP2 - FERM, ARHGEF and pleckstrin domain-containing protein 2, O94887; FERMT3 - Fermitin family homolog 3, Q86UX7; FRMD4A - FERM domain-containing protein 4A, Q9P2Q2; GFPT2 - Glutamine--fructose-6-phosphate aminotransferase 2, O94808; GIPC3 - PDZ domain-containing protein GIPC3, Q8TF64; GNA12 - Guanine nucleotide-binding protein subunit alpha-12, Q03113; GOLPH3 - Golgi phosphoprotein 3, Q9H4A6; GYPC - Glycophorin-C, P04921; HLA-B - HLA class I histocompatibility antigen, B-7 alpha chain, P30493; IL1B - Interleukin-1 beta, P01584; KCMF1 - E3 ubiquitin-protein ligase KCMF1, Q9P0J7; LLGL1 - Lethal(2) giant larvae protein homolog 1, Q15334; LOXL4 - Lysyl oxidase homolog 4, Q96JB6; LRRC15 - Leucine-rich repeat-containing protein 15, Q8TF66; LRRFIP1 - Leucine-rich repeat flightless-interacting protein 1, Q32MZ4; LYN - Tyrosine-protein kinase Lyn, P07948; MLLT4 - Afadin, P55196; MPP1 - 55 kDa erythrocyte membrane protein, Q00013; MYO10 - Unconventional myosin-X, Q9HD67; NCK2 - Cytoplasmic protein NCK2, O43639; NRP1 - Neuropilin-1, O14786; PAK4 - Serine/threonine-protein kinase PAK 4, O96013; PDLIM7 - PDZ and LIM domain protein 7, Q9NR12; PFDN2 - Prefoldin subunit 2, Q9UHV9; PHLDB1 - Pleckstrin homology like domain family B member 1 Q86UU1; PIP4K2A - Phosphatidylinositol 5-phosphate 4-kinase type-2 alpha, P48426; PLCB1 - 1-phosphatidylinositol 4,5-bisphosphate phosphodiesterase beta-1, Q9NQ66; PLXNA1 - Plexin-A1, Q9UIW2; PPM1B - Protein phosphatase 1B, O75688; PPME1 - Protein phosphatase methylesterase 1, Q9Y570; PRKAR1B - cAMP-dependent protein kinase type I-beta regulatory subunit, P31321; PTK2 - Focal adhesion kinase 1, Q05397; PTPRF - Receptor-type tyrosine-protein phosphatase F, P10586; PTPRJ - Receptor-type tyrosine-protein phosphatase eta, Q12913; PTX3 - Pentraxin-related protein PTX3, P26022; RAI14 - Ankycorbin, Q9P0K7; RRM2 - Ribonucleoside-diphosphate reductase subunit M2, P31350; SERPINE1 - Plasminogen activator inhibitor 1, P05121; SLC5A3 - Sodium/myo-inositol cotransporter, P53794; SPAG9 - C-Jun-amino-terminal kinase-interacting protein 4, O60271; ST13 - Hsc70-interacting protein, P50502; STX4 - Syntaxin-4, Q12846; TAOK1 - Serine/threonine-protein kinase TAO1, Q7L7X3; TBXAS1 - Thromboxane-A synthase, P24557; TNFAIP8 - Tumor necrosis factor alpha-induced protein 8, O95379; TRIO - Triple functional domain protein, O75962; TRPV4 - Transient receptor potential cation channel subfamily V member 4, Q9HBA0; UAP1 - UDP-N-acetylhexosamine pyrophosphorylase, Q16222; UBASH3B - Ubiquitin-associated and SH3 domain-containing protein B, Q8TF42; VAT1L - Synaptic vesicle membrane protein VAT-1 homolog-like, Q9HCJ6

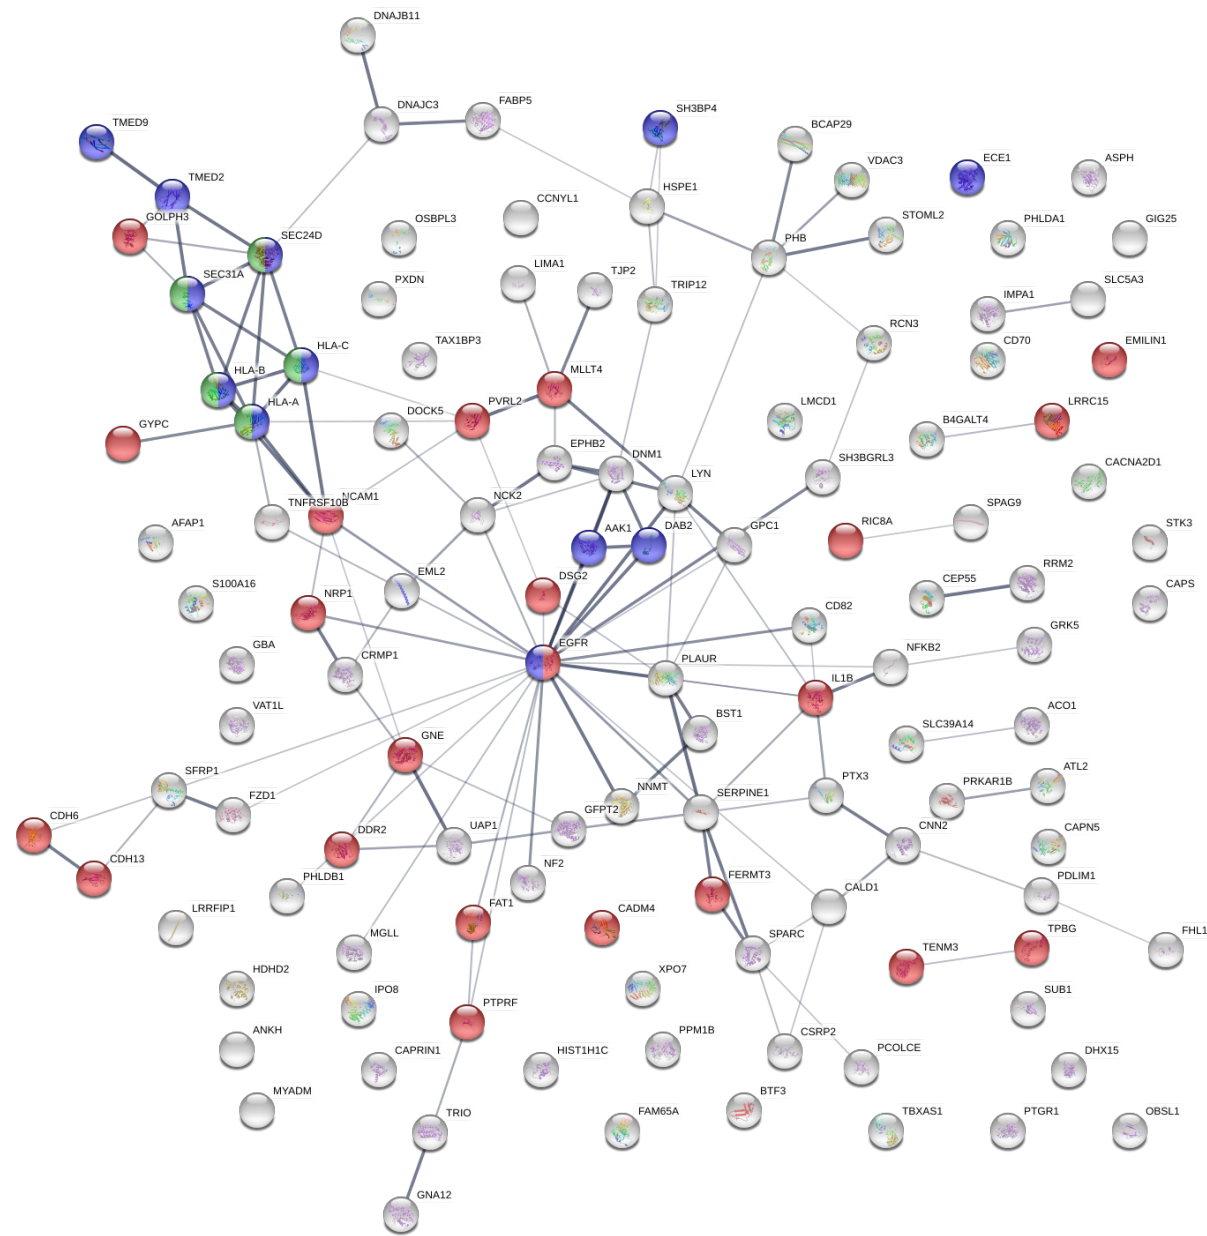

**Figure S5**

**Figure S5** Proteins unique for WM1205Lu ectosomes in comparison to WM266-4 ectosomes (this means proteins identified in both biological replicates of WM1205Lu ectosomes with at least 2 unique peptides but not found in any WM266-4 samples). Red colour corresponds to the enriched GO term GO:0022610 - biological adhesion (FDR=1.2<sup>-5</sup>, 22 proteins), blue to GO:0030135 - coated vesicle (FDR=7.93<sup>-6</sup>, 12 proteins), and green to GO:983170 - antigen presentation: folding, assembly and peptide loading of class I MHC (FDR=0.00047, 5 proteins).

**PROTEIN ABBREVIATION, protein full name, UNIPROT ID;** DOCK5 - Dedicator of cytokinesis protein 5, AAK1 - AP2-associated protein kinase 1, Q2M2I8; ACO1 - Cytoplasmic aconitate hydratase, P21399; AFAP1 - Actin filament-associated protein 1, Q8N556; ASPH - Aspartyl/asparaginyl beta-hydroxylase, Q12797; ATL2 - Atlantin-2, Q8NHH9; BCAP29 - B-cell receptor-associated protein 29, Q9UHQ4; BST1 - ADP-ribosyl cyclase/cyclic ADP-ribose hydrolase 2, Q10588; BTF3 - Transcription factor BTF3, P20290; CACNA2D1 - Voltage-dependent calcium channel subunit alpha-2/delta-1, P54289; CADM4 - Cell adhesion molecule 4, Q8NFFZ8; CALD1 - Caldesmon, Q05682; CAPN5 - Calpain-5, O15484; CAPRIN1 - Caprin-1, Q14444; CCNYL1 - Cyclin-Y-like protein 1, Q8N7R7; CD70 - CD70 antigen, P32970; CD82 - CD82 antigen, P27701; CDH13 - Cadherin-13, P55290; CDH6 - Cadherin-6, P55285; CEP55 - Centrosomal protein of 55 kDa, Q53EZ4; CNN2 - Calponin-2, Q99439; CRMP1 - Dihydropyrimidinase-related protein 1, Q14194; CSRP2 - Cysteine and glycine-rich protein 2, Q16527; DAB2 - Disabled homolog 2, P98082; DDR2 - Discoidin domain-containing receptor 2, Q16832; DHX15 - Pre-mRNA-splicing factor ATP-dependent RNA helicase DHX15, O43143; DNAJB11 - DnaJ homolog subfamily B member 11, Q9UBS4; DNAJC3 - DnaJ homolog subfamily C member 3, Q13217; DNMI1 - Dynamin-1, Q05193; DSG2 - Desmoglein-2, Q14126; ECE1 - Endothelin-converting enzyme 1, P42892; EGFR - Epidermal growth factor receptor, P00533; EMILIN1 - EMILIN-1, Q9Y6C2; EML2 - Echinoderm microtubule-associated protein-like 2, O95834; EPHB2 - Ephrin type-B receptor 2, P29323; FABP5 - Fatty acid-binding protein, epidermal, Q01469; FAT1 - Protocadherin Fat 1, Q14517; FERMT3 - Fermitin family homolog 3, Q86UX7; FZD1 - Frizzled-1, Q9UP38; GBA - Glucosylceramidase beta P04062; GFPT2 - Glutamine--fructose-6-phosphate aminotransferase 2, O94808; GIG25 - Serpin peptidase inhibitor, clade A (alpha-1 antiproteinase, antitrypsin), member 3, P01011; GNA12 - Guanine nucleotide-binding protein subunit alpha-12, Q03113; GNE - Bifunctional UDP-N-acetylglucosamine 2-epimerase/N-acetylmannosamine kinase, Q9Y223; GOLPH3 - Golgi phosphoprotein 3, Q9H4A6; GPC1 - Glypican-1, P35052; GRK5 - G protein-coupled receptor kinase 5, P34947; HDHD2 - Haloacid dehalogenase like hydrolase domain containing 2 Q9H0R4; HIST1H1C - Histone H1.2, P16403; HLA-A - HLA class I histocompatibility antigen, A-3 alpha chain, P30443; HLA-B - HLA class I histocompatibility antigen, B-7 alpha chain, P10319; HLA-B - HLA class I histocompatibility antigen, B-7 alpha chain, P30491; HLA-B - HLA class I histocompatibility antigen, B-7 alpha chain, P30493; HLA-C - HLA class I histocompatibility antigen, Cw-7 alpha chain, P30508; HSPE1 - 10 kDa heat shock protein, mitochondrial, P61604; IL1B - Interleukin-1 beta, P01584; IMPA1 - Inositol monophosphatase 1, P29218; IPO8 - Importin-8, O15397; LIMA1 - LIM domain and actin-binding protein 1, Q9UHB6; LMCD1 - LIM and cysteine-rich domains protein 1, Q9NZU5; LRRC15 - Leucine-rich repeat-containing protein 15, Q8TF66; LRRFIP1 - Leucine-rich repeat flightless-interacting protein 1, Q32MZ4; LYN - Tyrosine-protein kinase Lyn, P07948; MGLL - Monoglyceride lipase, Q99685; MYADM - Myeloid associated differentiation marker, Q96S97; NCAM1 - Neural cell adhesion molecule 1, P13591; NCK2 - Cytoplasmic protein NCK2, O43639; NF2 - Merlin, P35240; NFKB2 - Nuclear factor NF-kappa-B p100 subunit, Q00653; NNMT - Nicotinamide N-methyltransferase, P40261; NRP1 - Neuropilin-1, O14786; O14763; CAPS - Calcyphosin, O60513; XPO7 - Exportin-7, O75147; PTX3 - Pentraxin-related protein PTX3, OSBPL3 - Oxysterol-binding protein-related protein 3, Q9H4L5; P04921; B4GALT4 - Beta-1,4-galactosyltransferase 4, P05121; ANKH - Progressive ankylosis protein homolog, P10586; OBSL1 - Obscurin-like protein 1, P26022; SERPINE1 - Plasminogen activator inhibitor 1, P31350; TNFRSF10B - Tumor necrosis factor receptor superfamily member 10B, P55196; GYPC - Glycophorin-C, PCOLCE - Procollagen C-endopeptidase enhancer 1, Q15113; PDLIM1 - PDZ and LIM domain protein 1, O00151; PHB - Prohibitin, P35232; PHLDB1 - Pleckstrin homology like domain family B member 1 Q86UU1; PLAUR - Urokinase plasminogen activator surface receptor, Q03405; PPM1B - Protein phosphatase 1B, O75688; PRKAR1B - cAMP-dependent protein kinase type I-beta regulatory subunit, P31321; PTGR1 - Prostaglandin reductase 1, Q14914; PVRL2 - Nectin-2, Q92692; PXDN - Peroxidase homolog, Q92626; Q13641; PTPRF - Receptor-type tyrosine-protein phosphatase F, Q13642; MLLT4 - Afadin, Q13938; TPBG - Trophoblast glycoprotein, Q6ZS17; RRM2 - Ribonucleoside-diphosphate reductase subunit M2, Q8WV24; FHL1 - Four and a half LIM domains protein 1, Q9H7D0; PHLDA1 - Pleckstrin homology-like domain family A member 1, Q9HCJ1; AACT - Alpha-1-antichymotrypsin, Q9UIA9; FAM65A - Rho family-interacting cell polarization regulator 1, RCN3 - Reticulocalbin-3, Q96D15; RIC8A - Synembryn-A, Q9NPQ8; S100A16 - Protein S100-A16, Q96FQ6; SEC24D - Protein transport protein Sec24D, O94855; SEC31A - Protein transport protein Sec31A, O94979; SFRP1 - Secreted frizzled-related protein 1, Q8N474; SH3BGL3 - SH3 domain-binding glutamic acid-rich-like protein 3, Q9H299; SH3BP4 - SH3 domain-binding protein 4, Q9P0V3; SLC39A14 - Zinc transporter ZIP14, Q15043; SLC5A3 - Sodium/myo-inositol cotransporter, P53794; SPAG9 - C-Jun-amino-terminal kinase-interacting protein 4, O60271; SPARC - SPARC, P09486; STK3 - Serine/threonine-protein kinase 3, Q13188; STOML2 - Stomatin-like protein 2, mitochondrial, Q9UIZ1; SUB1 - Activated RNA polymerase II transcriptional coactivator p15, P53999; TAX1BP3 - Tax1-binding protein 3, O14907; TBXAS1 - Thromboxane-A synthase, P24557; TENM3 - Teneurin-3, Q9P273; TJP2 - Tight junction protein ZO-2, Q9UDY2; TMED2 - Transmembrane emp24 domain-containing protein 2, Q15363; TMED9 - Transmembrane emp24 domain-containing protein 9, Q9BVK6; TRIO - Triple functional domain protein, O75962; TRIP12 - E3 ubiquitin-protein ligase TRIP12, Q14669; UAP1 - UDP-N-acetylhexosamine pyrophosphorylase, Q16222; VAT1L - Synaptic vesicle membrane protein VAT-1 homolog-like, Q9HCJ6; VDACC3 - Voltage-dependent anion-selective channel protein 3, Q9Y277

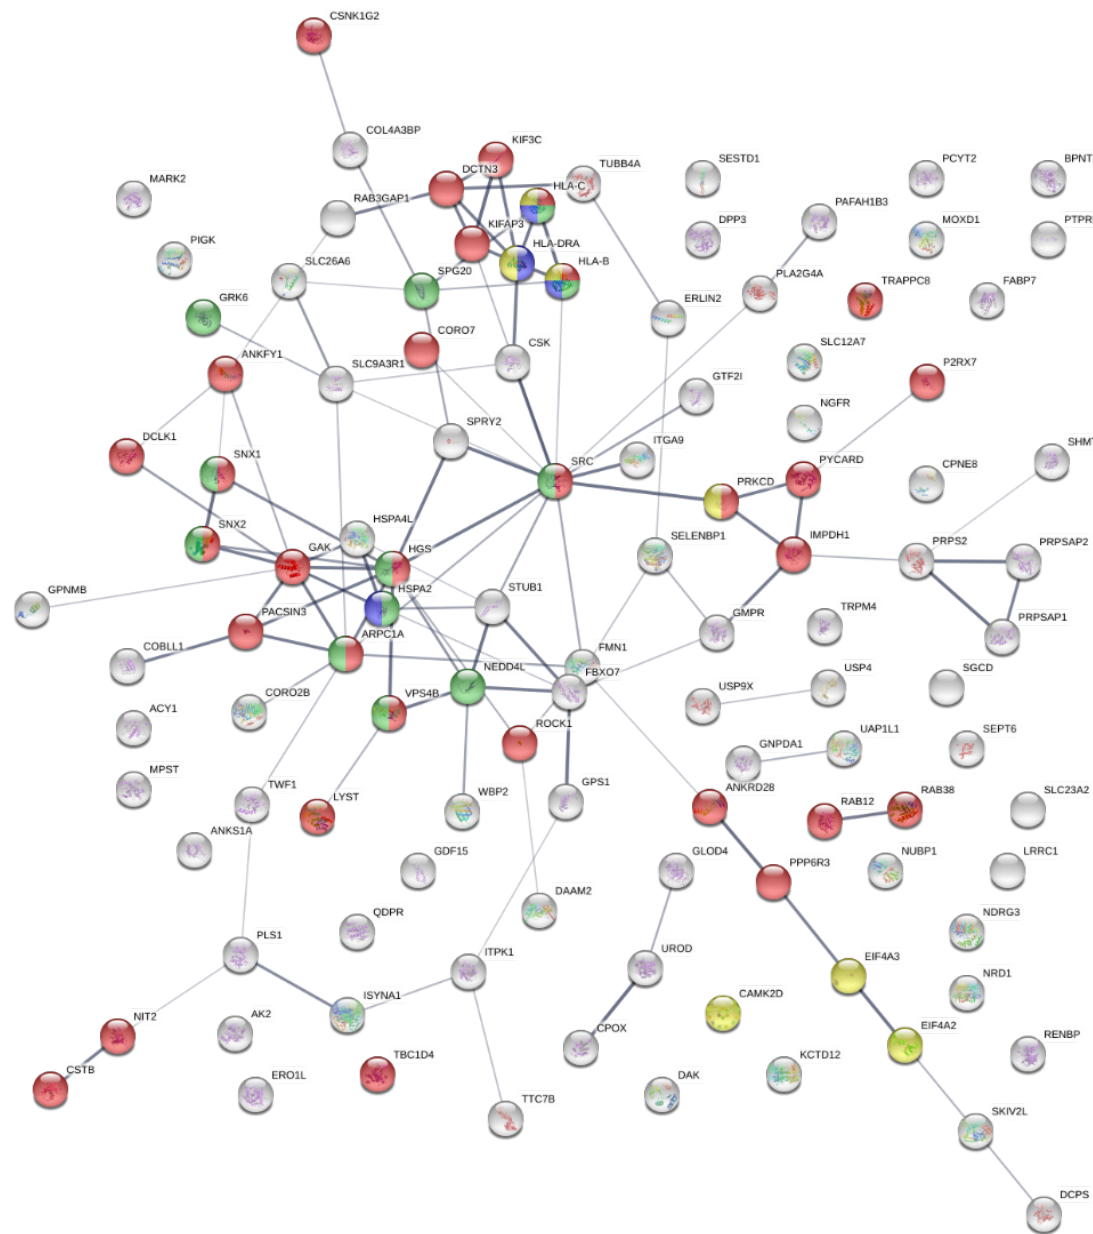

Figure S6

**Figure S6** Proteins unique for WM266-4 ectosomes in comparison to WM1205Lu ectosomes (this means proteins identified in both biological replicates of WM266-4 ectosomes with at least 2 unique peptides but not found in any WM1205Lu samples). Red colour corresponds to the enriched GO term GO:0016192 - vesicle-mediated transport (FDR=3.96<sup>-6</sup>, 31 proteins), blue to GO:04612 - antigen processing and presentation (FDR=0.0271, 4 proteins), green to GO:04144 - endocytosis (FDR=3.45<sup>-6</sup>, 12 proteins), and yellow to GO:913531 - Interferon signaling (FDR=0.0102, 7 proteins).

**PROTEIN ABBREVIATION, protein full name, UNIPROT ID;** ACY1 - Aminoacylase-1, Q03154; ANKFY1 - Rabankyrin-5, Q9P2R3; ANKS1A - Ankyrin repeat and SAM domain-containing protein 1A, Q92625; ARPC1A - Actin-related protein 2/3 complex subunit 1A, Q92747; BPNT1 - 3(2),5-bisphosphate nucleotidase 1, O95861; CAMK2D - Calcium/calmodulin-dependent protein kinase type II subunit delta, Q13557; COBLL1 - Cordon-bleu WH2 repeat protein like 1 Q53SF7; CORO7 - Coronin-7, P57737; CPOX - Oxygen-dependent coproporphyrinogen-III oxidase, mitochondrial, P36551; CSTB - Cystatin-B, P04080; DCLK1 - Serine/threonine-protein kinase DCLK1, O15075; DPP3 - Dipeptidyl peptidase 3, Q9NY33; EIF4A2 - Eukaryotic initiation factor 4A-II, Q14240; EIF4A3 - Eukaryotic initiation factor 4A-III, P38919; FBXO7 - F-box only protein 7, GAK - Cyclin-G-associated kinase, O14976; GDF15 - Growth differentiation factor 15, Q99988; GLOD4 - Glyoxalase domain containing 4 Q9HC38; GNPDA1 - Glucosamine-6-phosphate isomerase 1, P46926; GPNMB - Transmembrane glycoprotein NMB, Q14956; GPS1 - COP9 signalosome complex subunit 1, Q13098; HLA-B - HLA class I histocompatibility antigen, B-7 alpha chain, P30481; HLA-C - HLA class I histocompatibility antigen, Cw-7 alpha chain, P10321; HLA-DRA - HLA class II histocompatibility antigen, DR alpha chain, P01903; HSPA2 - Heat shock-related 70 kDa protein 2, P54652; HSPA4L - Heat shock 70 kDa protein 4L, O95757; ISYNA1 - Inositol-3-phosphate synthase 1, Q9NPH2; KCTD12 - BTB/POZ domain-containing protein KCTD12, Q96CX2; LRRC1 - Leucine-rich repeat-containing protein 1, Q9BTT6; NDRG3 - Protein NDRG3, Q9UGV2; NEDD4L - E3 ubiquitin-protein ligase NEDD4-like, Q96PU5; NGFR - Tumor necrosis factor receptor superfamily member 16, P08138; NIT2 - Omega-amidase NIT2, Q9NQR4; NRD1 - Nardilysin, O43847; O14782; MARK2 - Serine/threonine-protein kinase MARK2, O14964; COL4A3BP - Collagen type IV alpha-3-binding protein, O15084; RAB3GAP1 - Rab3 GTPase-activating protein catalytic subunit, O15540; HGS - Hepatocyte growth factor-regulated tyrosine kinase substrate, O60256; FABP7 - Fatty acid-binding protein, brain, O75351; PRPSAP2 - Phosphoribosyl pyrophosphate synthase-associated protein 2, O75935; TRAPPC8 - Trafficking protein particle complex subunit 8, O94905; KIF3C - Kinesin-like protein KIF3C, P06132; ERLIN2 - Erlin-2, P13762; DCTN3 - Dynactin subunit 3, P20839; RENBP - N-acetylglucosamine 2-epimerase, P25325; - - Sorry, STRING found no proteins by this name in Homo sapiens - - P28827; VPS4B - Vacuolar protein sorting-associated protein 4B, P2RX7 - P2X purinoceptor 7, Q99572; P36959; PTPRM - Receptor-type tyrosine-protein phosphatase mu, P41240; UROD - Uroporphyrinogen decarboxylase, P43250; CSK - Tyrosine-protein kinase CSK, P51606; UAP1L1 - UDP-N-acetylhexosamine pyrophosphorylase-like protein 1, P53384; MPST - 3-mercaptopyruvate sulfurtransferase, P54819; GMPR - GMP reductase 1, P57729; PYCARD - Apoptosis-associated speck-like protein containing a CARD, P78347; ANKRD28 - Serine/threonine-protein phosphatase 6 regulatory ankyrin repeat subunit A, P78368; NUBP1 - Cytosolic Fe-S cluster assembly factor NUBP1, PAFAH1B3 - Platelet-activating factor acetylhydrolase IB subunit gamma, Q15102; PLA2G4A - Cytosolic phospholipase A2, P47712; PLS1 - Plastin-1, Q14651; PRKCD - Protein kinase C delta type, Q05655; PRPS2 - Ribose-phosphate pyrophosphokinase 2, P11908; Q12792; GTF2I - General transcription factor II-I, Q13107; GRK6 - G protein-coupled receptor kinase 6, Q13572; SLC12A7 - Solute carrier family 12 member 7, Q13797; USP9X - Probable ubiquitin carboxyl-terminal hydrolase FAF-X, Q14558; ITGA9 - Integrin alpha-9, Q15042; SLC23A2 - Solute carrier family 23 member 2, Q15477; AK2 - Adenylate kinase 2, mitochondrial, Q3KQV9; PRPSAP1 - Phosphoribosyl pyrophosphate synthase-associated protein 1, Q3LXA3; SKIV2L - Helicase SKI2W, Q5H9R7; USP4 - Ubiquitin carboxyl-terminal hydrolase 4, Q68DA7; IMPDH1 - Inosine-5-monophosphate dehydrogenase 1, Q6UVY6; STUB1 - E3 ubiquitin-protein ligase CHIP, Q7KZI7; TWF1 - Twinfilin-1, Q86T65; TRPM4 - Transient receptor potential cation channel subfamily M member 4, Q86VW0; ENSG00000103426 - Coronin-7, Q86YQ8; SESTD1 - SEC14 domain and spectrin repeat-containing protein 1, Q8N0X7; CPNE8 - Copine-8, Q8TD43; MOXD1 - Monooxygenase DBH like 1, Q92643; CSNK1G2 - Casein kinase I isoform gamma-2, Q92845; DAK - Trikinase/FMN cyclase, Q93008; RAB38 - Ras-related protein Rab-38, Q969T9; PPP6R3 - Serine/threonine-protein phosphatase 6 regulatory subunit 3, Q96C86; WBP2 - WW domain-binding protein 2, Q96HE7; ITPK1 - Inositol-tetrakisphosphate 1-kinase, Q99447; DCPS - m7GpppX diphosphatase, Q99698; PCYT2 - Ethanolamine-phosphate cytidyltransferase, Q9BXS9; FMN1 - Formin-1, Q9UGH3; DAAM2 - Dishevelled associated activator of morphogenesis 2, Q9UKS6; SPG20 - Spartin, Q9ULZ3; PACSIN3 - Protein kinase C and casein kinase substrate in neurons protein 3, Q9UNE7; PIGK - GPI-anchor transamidase, Q9UQ03; LYST - Lysosomal-trafficking regulator, Q9Y2L5; KIFAP3 - Kinesin-associated protein 3, Q9Y3I1; CORO2B - Coronin-2B, Q9Y5P4; ERO1L - ERO1-like protein alpha, Q9Y666; SLC26A6 - Solute carrier family 26 member 6, QDPR - Dihydropteridine reductase, P09417; RAB12 - Ras-related protein Rab-12, Q6IQ22; ROCK1 - Rho-associated protein kinase 1, Q13464; SELENBP1 - Selenium-binding protein 1, Q13228; SEPT6 - Septin-6, Q14141; SGCD - Delta-sarcoglycan, Q92629; SHMT1 - Serine hydroxymethyltransferase, cytosolic, P34896; SLC9A3R1 - Na(+)/H(+) exchange regulatory cofactor NHE-RF1, O14745; SNX1 - Sorting nexin-1, Q13596; SNX2 - Sorting nexin-2, O60749; SPRY2 - Protein sprouty homolog 2, O43597; SRC - Proto-oncogene tyrosine-protein kinase Src, P12931; TBC1D4 - TBC1 domain family member 4, O60343; TTC7B - Tetratricopeptide repeat protein 7B, Q86TV6; TUBB4A - Tubulin beta-4A chain, P04350
