# Supplementary material for: Mass Spectrometry-Based Proteomic Characterization of Cutaneous Melanoma Ectosomes Reveals the Presence of Cancer-Related Molecules
Source: MDPI journal article supplement (doi:10.3390/ijms21082934), 2020-04-22
Supplement: s1 [file s1]

### Supplementary Data 3 for IJMS-766952

Our centrifugation protocol comprises 4 pre-preparation steps:

1. at 400 x g (5 min, 4°C)
2. 4,000 x g (20 min, 4°C)
3. 7,000 x g (20 min, 4°C)

to remove remaining cells and cellular debris

and one final centrifugation I for ectosome sedimentation at 18,000 x g (20 min, 4°C).

This protocol has been designed and optimized after theoretical considerations, based on the model proposed by Livshits et al. (2015) in their paper [1].

During centrifugation at angular velocity  $\omega$ , three forces act on a mass particle  $m$ :

- |                                    |                       |
|------------------------------------|-----------------------|
| 1. Centrifugal force:              | $F = m\omega^2 R$     |
| 2. Dynamic friction (Stokes force) | $T = -6\pi\eta r_c v$ |
| 3. Buoyancy force:                 | $W = V\rho_{solv}a$   |

The condition of force balance  $F + W + T = 0$  leads to the following equation (Svedberg equation):

$$v = \frac{dR}{dt} = g_{eff} \frac{d^2}{18\eta} (\rho - \rho_{solv}); \quad g_{eff} = \omega^2 R \quad (1)$$

where:

|          |                                    |               |                                         |
|----------|------------------------------------|---------------|-----------------------------------------|
| $m$      | molecular mass                     | $V$           | molecule volume                         |
| $\omega$ | angular velocity                   | $\rho_{solv}$ | solvent density                         |
| $R$      | distance from the axis of rotation | $a$           | centrifugal acceleration                |
| $\eta$   | lepkość dynamiczna medium          | $d_s$         | the Stokes diameter (dynamic diameter), |
| $r_c$    | molecule radius (sphere)           | $\rho$        | protein density                         |
| $v$      | molecule sedimentation velocity    |               |                                         |

Equation (1) can be written in the following form:

$$\frac{dR}{dt} = \lambda R; \quad \lambda = \frac{\omega^2 d^2}{18\eta} (\rho - \rho_{solv}) \quad (2)$$

Then its solution is as follows

$$R(t) = R(0)e^{\lambda t} \quad (3)$$

Based on the above equation and geometric relationships for the fixed angle A27-8x50 rotor Livshits et al. (2015) determined the “efficiency” parameter of the centrifugation process

*Pelleted(d)* i.e. a fraction of particles of a given diameter  $d$  which after time  $t$  travels the distance  $L_{sed}$  [1]. We can call this fraction as an enriched fraction

$$Pelleted(d) = \frac{2}{\pi} \left( \arcsin \frac{vt}{L_{sed}} + \frac{vt}{L_{sed}} \sqrt{1 - \left( \frac{vt}{L_{sed}} \right)^2} \right) \quad (4)$$

Calculator: <http://vesicles.niifhm.ru/index.php?do=1>

Suppl. Table 1. Centrifugation parameters for the Sorvall LYNX centrifuge (Thermo Scientific) equipped with the fixed angle A27-8x50 rotor (Thermo Scientific)

|                                    | A27-8x50  |
|------------------------------------|-----------|
| $R_{min}$ [mm]                     | 33        |
| $R_{max}$ [mm]                     | 107       |
| $\theta$ [°]                       | 34        |
| tube dimension $\emptyset$ [mm]    | 29        |
| $\rho$ [g/cm <sup>3</sup> ]        | 1.1 ÷ 1.3 |
| $\rho_{solv}$ [g/cm <sup>3</sup> ] | 1.0       |
| $\eta$ [cP]                        | 1.0 ÷ 1.5 |
| $RCF$                              | 18 000 g  |
| $T$ [min]                          | 20, 90    |

$R_{min}$  minimal rotor radius  
 $R_{max}$  maximal rotor radius  
 $\theta$  rotor angle  
 $\rho_{solv}$  solvent density  
 $RCF$  relative centrifugation force [g]  
 $\eta$  dynamic solvent viscosity  
 $T$  centrifugation time

According to this calculations the enrichment of pellet with soluble/secretory proteins in their average molecular mass around 60kDa (e.g. albumin 63 kDa) is about 0 to 1%, depending on assumed  $\rho$  protein density (1.22 to 1.43 g/cm<sup>3</sup>) [2,3]. If the duration of the centrifugation process is extended to 90 min (more 4 times) protein enrichment will achieve 3% (Suppl Table 2). Cut off  $d_s$  is a molecule (protein) dimension to sediment 100% of protein molecules in those centrifugation conditions.

Supplementary Table 2. Calculated protein enrichment in different centrifugation time for typical human plasma proteins

| $\rho$ [g/cm <sup>3</sup> ] | Cut off $d_s$ | Albumin enrichment [%] | Fibrinogen enrichment [%] |
|-----------------------------|---------------|------------------------|---------------------------|
| Centrifugation time 20 min  |               |                        |                           |
| 1,22 [2]                    | 142           | 0                      | 3                         |
| 1,35 [4]                    | 113           | 0                      | 5                         |
| 1,43 [3]                    | 102           | 1                      | 6                         |
| Centrifugation time 90 min  |               |                        |                           |
| 1,22 [2]                    | 67            | 1                      | 13                        |
| 1,35 [4]                    | 53            | 2                      | 21                        |
| 1,43 [3]                    | 48            | 3                      | 25                        |

$d_s$  the Stokes diameter (dynamic diameter), calculated for albumin (7.1 nm) and fibrinogen (21.5 nm) [4]

$\rho$  protein density

---

1 Livshits M.A., Khomyakova E., Evtushenko E.G., et al. Isolation of exosomes by differential centrifugation: Theoretical analysis of a commonly used protocol [published correction appears in Sci. Rep. 2016; 6:21447. Livshits, Mikhail A. [corrected to Livshits, Mikhail A]]. Sci. Rep. 2015; 5:17319. Published 2015 Nov 30. doi:10.1038/srep17319

2 Andersson K.M., Hovmoller S. The protein content in crystals and packing coefficients in different space groups. Acta Cryst. 2000; D56, 789-790. doi.org/10.1107/S0907444900005163

3 Quillin M.L., Matthews B.W. Accurate calculation of the density of proteins. Acta Cryst. 2000; D56, 791-794. doi.org/10.1107/S090744490000679X

4 Erickson H.P. Size and shape of protein molecules at the nanometer level determined by sedimentation, gel filtration, and electron microscopy. Biological Procedures Online, 2009; 11, 32-51. doi:10.1007/s12575-009-9008-x
