# Supplementary material for: Mass Spectrometry-Based Proteomic Characterization of Cutaneous Melanoma Ectosomes Reveals the Presence of Cancer-Related Molecules
Source: MDPI journal article supplement (doi:10.3390/ijms21082934), 2020-04-22
Supplement: s1 [file s1]

Archive with 5 entries (5 files):
- Supplementary Data/~$pplementary Data 3.docx
- Supplementary Data/Supplementary Data 1.xlsx
- Supplementary Data/Supplementary Data 2.pdf
- Supplementary Data/Supplementary Data 4.xlsx
- Supplementary Data/Supplementary Data 3.pdf
