# Supplementary material for: Mass Spectrometry-Based Proteomic Characterization of Cutaneous Melanoma Ectosomes Reveals the Presence of Cancer-Related Molecules
Source: MDPI journal article supplement (doi:10.3390/ijms21082934), 2020-04-22
Supplement: s1 [file s1 › Supplementary Data/Supplementary Data 1.xlsx]

## Sheet: WM115 - Biol. replicate 1
Accession	Description	Score	Coverage	# Proteins	# Unique Peptides	# Peptides	# PSMs	# AAs	MW [kDa]	calc. pI
P63261	Actin, cytoplasmic 2 OS=Homo sapiens GN=ACTG1 PE=1 SV=1 - [ACTG_HUMAN]	14514.8	87.73	9	2	29	437	375	41.7658	5.47803
P60709	Actin, cytoplasmic 1 OS=Homo sapiens GN=ACTB PE=1 SV=1 - [ACTB_HUMAN]	14164.8	87.47	9	1	28	424	375	41.7097	5.47803
P02751	Fibronectin OS=Homo sapiens GN=FN1 PE=1 SV=4 - [FINC_HUMAN]	11616.2	49.66	1	71	71	282	2386	262.46	5.70654
P14618	Pyruvate kinase isozymes M1/M2 OS=Homo sapiens GN=PKM2 PE=1 SV=4 - [KPYM_HUMAN]	11569.6	83.62	3	41	41	298	531	57.9	7.84033
P35580	Myosin-10 OS=Homo sapiens GN=MYH10 PE=1 SV=3 - [MYH10_HUMAN]	10114.6	46.71	10	73	83	231	1976	228.858	5.5415
P04406	Glyceraldehyde-3-phosphate dehydrogenase OS=Homo sapiens GN=GAPDH PE=1 SV=3 - [G3P_HUMAN]	8604.19	84.48	1	21	22	254	335	36.0304	8.45557
P06733	Alpha-enolase OS=Homo sapiens GN=ENO1 PE=1 SV=2 - [ENOA_HUMAN]	8288.18	73.04	2	22	26	184	434	47.1393	7.38623
P05023	Sodium/potassium-transporting ATPase subunit alpha-1 OS=Homo sapiens GN=ATP1A1 PE=1 SV=1 - [AT1A1_HUMAN]	7622.99	39.69	6	36	36	179	1023	112.824	5.49072
P07355	Annexin A2 OS=Homo sapiens GN=ANXA2 PE=1 SV=2 - [ANXA2_HUMAN]	7057.61	76.7	3	27	28	175	339	38.5798	7.75244
P35579	Myosin-9 OS=Homo sapiens GN=MYH9 PE=1 SV=4 - [MYH9_HUMAN]	6927.86	41.68	10	57	67	157	1960	226.392	5.60498
P26038	Moesin OS=Homo sapiens GN=MSN PE=1 SV=3 - [MOES_HUMAN]	6898.49	58.23	1	21	35	187	577	67.7778	6.40479
P11142	Heat shock cognate 71 kDa protein OS=Homo sapiens GN=HSPA8 PE=1 SV=1 - [HSP7C_HUMAN]	6893.66	58.51	1	19	29	169	646	70.8542	5.51611
P21333	Filamin-A OS=Homo sapiens GN=FLNA PE=1 SV=4 - [FLNA_HUMAN]	6772.81	45.9	3	78	78	183	2647	280.564	6.06201
P12814	Alpha-actinin-1 OS=Homo sapiens GN=ACTN1 PE=1 SV=2 - [ACTN1_HUMAN]	6732.42	67.83	2	30	48	179	892	102.993	5.41455
Q6UVK1	Chondroitin sulfate proteoglycan 4 OS=Homo sapiens GN=CSPG4 PE=1 SV=2 - [CSPG4_HUMAN]	6373.73	33.16	1	57	57	153	2322	250.382	5.46533
P07093	Glia-derived nexin OS=Homo sapiens GN=SERPINE2 PE=1 SV=1 - [GDN_HUMAN]	6129.11	58.04	1	21	21	147	398	43.9742	9.29053
P08238	Heat shock protein HSP 90-beta OS=Homo sapiens GN=HSP90AB1 PE=1 SV=4 - [HS90B_HUMAN]	5986.72	55.52	8	22	38	158	724	83.2121	5.03369
P07900	Heat shock protein HSP 90-alpha OS=Homo sapiens GN=HSP90AA1 PE=1 SV=5 - [HS90A_HUMAN]	5778.19	55.33	9	23	37	151	732	84.6067	5.021
P04264	Keratin, type II cytoskeletal 1 OS=Homo sapiens GN=KRT1 PE=1 SV=6 - [K2C1_HUMAN]	5735.77	50.31	3	24	28	127	644	65.999	8.11865
P49327	Fatty acid synthase OS=Homo sapiens GN=FASN PE=1 SV=3 - [FAS_HUMAN]	5703.4	43.33	3	73	73	163	2511	273.254	6.44287
P46940	Ras GTPase-activating-like protein IQGAP1 OS=Homo sapiens GN=IQGAP1 PE=1 SV=1 - [IQGA1_HUMAN]	5591.56	54.07	2	62	63	136	1657	189.134	6.48096
P68032	Actin, alpha cardiac muscle 1 OS=Homo sapiens GN=ACTC1 PE=1 SV=1 - [ACTC_HUMAN]	5378.2	34.75	8	1	16	213	377	41.9919	5.38916
P13645	Keratin, type I cytoskeletal 10 OS=Homo sapiens GN=KRT10 PE=1 SV=6 - [K1C10_HUMAN]	5371.94	48.97	7	20	22	104	584	58.7917	5.21143
P24821	Tenascin OS=Homo sapiens GN=TNC PE=1 SV=3 - [TENA_HUMAN]	5331.32	39.53	1	57	57	131	2201	240.7	4.89404
P07437	Tubulin beta chain OS=Homo sapiens GN=TUBB PE=1 SV=2 - [TBB5_HUMAN]	5213.81	74.32	3	5	27	140	444	49.639	4.89404
O43707	Alpha-actinin-4 OS=Homo sapiens GN=ACTN4 PE=1 SV=2 - [ACTN4_HUMAN]	5082.13	61.8	1	27	46	137	911	104.788	5.43994
Q9NZM1	Myoferlin OS=Homo sapiens GN=MYOF PE=1 SV=1 - [MYOF_HUMAN]	4993.94	41.34	2	68	68	146	2061	234.561	6.17627
P35241	Radixin OS=Homo sapiens GN=RDX PE=1 SV=1 - [RADI_HUMAN]	4834.59	51.97	1	14	31	156	583	68.5214	6.3667
Q00610	Clathrin heavy chain 1 OS=Homo sapiens GN=CLTC PE=1 SV=5 - [CLH1_HUMAN]	4750.18	46.09	3	51	51	122	1675	191.493	5.69385
P68371	Tubulin beta-4B chain OS=Homo sapiens GN=TUBB4B PE=1 SV=1 - [TBB4B_HUMAN]	4637.75	74.16	4	3	26	120	445	49.799	4.89404
P68363	Tubulin alpha-1B chain OS=Homo sapiens GN=TUBA1B PE=1 SV=1 - [TBA1B_HUMAN]	4539.17	57.65	4	1	17	107	451	50.1196	5.05908
P08758	Annexin A5 OS=Homo sapiens GN=ANXA5 PE=1 SV=2 - [ANXA5_HUMAN]	4443.55	68.75	1	19	20	107	320	35.9144	5.04639
Q13885	Tubulin beta-2A chain OS=Homo sapiens GN=TUBB2A PE=1 SV=1 - [TBB2A_HUMAN]	4395.12	68.09	3	5	25	116	445	49.875	4.89404
P13639	Elongation factor 2 OS=Homo sapiens GN=EEF2 PE=1 SV=4 - [EF2_HUMAN]	4369.42	53.85	1	38	39	142	858	95.277	6.82959
P00338	L-lactate dehydrogenase A chain OS=Homo sapiens GN=LDHA PE=1 SV=2 - [LDHA_HUMAN]	4363.82	62.95	4	19	20	120	332	36.6654	8.26514
P35527	Keratin, type I cytoskeletal 9 OS=Homo sapiens GN=KRT9 PE=1 SV=3 - [K1C9_HUMAN]	4243.62	77.69	1	28	28	94	623	62.0268	5.23682
Q9BQE3	Tubulin alpha-1C chain OS=Homo sapiens GN=TUBA1C PE=1 SV=1 - [TBA1C_HUMAN]	4164.84	53.23	3	2	16	97	449	49.8635	5.09717
Q9Y490	Talin-1 OS=Homo sapiens GN=TLN1 PE=1 SV=3 - [TLN1_HUMAN]	4144.3	34.08	1	49	54	96	2541	269.599	6.07471
Q09666	Neuroblast differentiation-associated protein AHNAK OS=Homo sapiens GN=AHNAK PE=1 SV=2 - [AHNK_HUMAN]	4118.46	31.85	1	72	74	122	5890	628.699	6.15088
Q14204	Cytoplasmic dynein 1 heavy chain 1 OS=Homo sapiens GN=DYNC1H1 PE=1 SV=5 - [DYHC1_HUMAN]	4002.01	24.09	1	82	82	131	4646	532.072	6.40479
P08670	Vimentin OS=Homo sapiens GN=VIM PE=1 SV=4 - [VIME_HUMAN]	3922.19	68.03	7	28	28	108	466	53.6191	5.12256
Q71U36	Tubulin alpha-1A chain OS=Homo sapiens GN=TUBA1A PE=1 SV=1 - [TBA1A_HUMAN]	3898.2	57.65	4	1	17	95	451	50.1036	5.05908
P63104	14-3-3 protein zeta/delta OS=Homo sapiens GN=YWHAZ PE=1 SV=1 - [1433Z_HUMAN]	3780.85	66.12	4	13	18	95	245	27.7277	4.79248
Q15149	Plectin OS=Homo sapiens GN=PLEC PE=1 SV=3 - [PLEC_HUMAN]	3458.33	19.92	3	68	68	101	4684	531.466	5.96045
Q02241	Kinesin-like protein KIF23 OS=Homo sapiens GN=KIF23 PE=1 SV=3 - [KIF23_HUMAN]	3347.01	40.73	2	31	31	84	960	109.99	8.51416
P00558	Phosphoglycerate kinase 1 OS=Homo sapiens GN=PGK1 PE=1 SV=3 - [PGK1_HUMAN]	3317.2	67.63	2	22	22	90	417	44.5861	8.104
P22314	Ubiquitin-like modifier-activating enzyme 1 OS=Homo sapiens GN=UBA1 PE=1 SV=3 - [UBA1_HUMAN]	3276.51	42.06	1	29	29	72	1058	117.774	5.75732
P35908	Keratin, type II cytoskeletal 2 epidermal OS=Homo sapiens GN=KRT2 PE=1 SV=2 - [K22E_HUMAN]	3270.34	48.51	10	20	26	73	639	65.3932	8.00146
P62258	14-3-3 protein epsilon OS=Homo sapiens GN=YWHAE PE=1 SV=1 - [1433E_HUMAN]	3260.28	68.63	1	13	16	86	255	29.1554	4.7417
O14578	Citron Rho-interacting kinase OS=Homo sapiens GN=CIT PE=1 SV=2 - [CTRO_HUMAN]	3206.73	28.66	1	48	48	100	2027	231.286	6.56592
P23528	Cofilin-1 OS=Homo sapiens GN=CFL1 PE=1 SV=3 - [COF1_HUMAN]	3132.42	73.49	1	10	14	73	166	18.4907	8.08936
P04075	Fructose-bisphosphate aldolase A OS=Homo sapiens GN=ALDOA PE=1 SV=2 - [ALDOA_HUMAN]	3087.04	74.73	2	15	19	76	364	39.3953	8.08936
P15311	Ezrin OS=Homo sapiens GN=EZR PE=1 SV=4 - [EZRI_HUMAN]	3084.41	36.52	2	9	23	102	586	69.3697	6.26514
P04083	Annexin A1 OS=Homo sapiens GN=ANXA1 PE=1 SV=2 - [ANXA1_HUMAN]	3076.7	67.92	2	20	21	70	346	38.69	7.02002
Q13509	Tubulin beta-3 chain OS=Homo sapiens GN=TUBB3 PE=1 SV=2 - [TBB3_HUMAN]	3055.21	46.44	1	3	18	80	450	50.4003	4.93213
P43121	Cell surface glycoprotein MUC18 OS=Homo sapiens GN=MCAM PE=1 SV=2 - [MUC18_HUMAN]	2922.24	41.02	2	26	26	78	646	71.5626	5.75732
P08195	4F2 cell-surface antigen heavy chain OS=Homo sapiens GN=SLC3A2 PE=1 SV=3 - [4F2_HUMAN]	2919.07	43.33	1	24	24	72	630	67.9517	5.0083
P68104	Elongation factor 1-alpha 1 OS=Homo sapiens GN=EEF1A1 PE=1 SV=1 - [EF1A1_HUMAN]	2870	55.63	3	16	16	93	462	50.1091	9.01221
P09104	Gamma-enolase OS=Homo sapiens GN=ENO2 PE=1 SV=3 - [ENOG_HUMAN]	2792.31	45.16	1	7	12	55	434	47.239	5.03369
O00159	Unconventional myosin-Ic OS=Homo sapiens GN=MYO1C PE=1 SV=4 - [MYO1C_HUMAN]	2754.25	39.51	1	36	36	80	1063	121.606	9.40771
P21589	5'-nucleotidase OS=Homo sapiens GN=NT5E PE=1 SV=1 - [5NTD_HUMAN]	2740.3	50.87	2	23	23	72	574	63.3275	7.03467
O00299	Chloride intracellular channel protein 1 OS=Homo sapiens GN=CLIC1 PE=1 SV=4 - [CLIC1_HUMAN]	2603.71	81.74	2	14	15	57	241	26.9057	5.17334
P55072	Transitional endoplasmic reticulum ATPase OS=Homo sapiens GN=VCP PE=1 SV=4 - [TERA_HUMAN]	2559.77	48.88	2	26	26	72	806	89.2657	5.26221
P11021	78 kDa glucose-regulated protein OS=Homo sapiens GN=HSPA5 PE=1 SV=2 - [GRP78_HUMAN]	2500.26	39.14	1	19	21	64	654	72.2884	5.16064
P0CG38	POTE ankyrin domain family member I OS=Homo sapiens GN=POTEI PE=3 SV=1 - [POTEI_HUMAN]	2461.58	8.09	6	1	10	82	1075	121.205	6.21436
P62937	Peptidyl-prolyl cis-trans isomerase A OS=Homo sapiens GN=PPIA PE=1 SV=2 - [PPIA_HUMAN]	2422.72	55.76	2	8	8	64	165	18.0009	7.81104
P06396	Gelsolin OS=Homo sapiens GN=GSN PE=1 SV=1 - [GELS_HUMAN]	2391.26	38.24	1	18	18	59	782	85.6442	6.27783
P35221	Catenin alpha-1 OS=Homo sapiens GN=CTNNA1 PE=1 SV=1 - [CTNA1_HUMAN]	2359.29	43.71	1	27	27	57	906	100.009	6.29053
P09525	Annexin A4 OS=Homo sapiens GN=ANXA4 PE=1 SV=4 - [ANXA4_HUMAN]	2353.01	62.07	1	17	18	55	319	35.8601	6.12549
P31946	14-3-3 protein beta/alpha OS=Homo sapiens GN=YWHAB PE=1 SV=3 - [1433B_HUMAN]	2312.56	60.57	2	7	13	63	246	28.0648	4.83057
Q9H0H5	Rac GTPase-activating protein 1 OS=Homo sapiens GN=RACGAP1 PE=1 SV=1 - [RGAP1_HUMAN]	2308.66	57.91	2	28	28	63	632	70.9818	8.88037
Q01082	Spectrin beta chain, brain 1 OS=Homo sapiens GN=SPTBN1 PE=1 SV=2 - [SPTB2_HUMAN]	2286.92	22.8	4	40	41	61	2364	274.439	5.56689
P78371	T-complex protein 1 subunit beta OS=Homo sapiens GN=CCT2 PE=1 SV=4 - [TCPB_HUMAN]	2283.16	60.56	1	23	23	50	535	57.4521	6.45557
P07195	L-lactate dehydrogenase B chain OS=Homo sapiens GN=LDHB PE=1 SV=2 - [LDHB_HUMAN]	2201.67	56.29	3	14	15	54	334	36.6151	6.04932
P11216	Glycogen phosphorylase, brain form OS=Homo sapiens GN=PYGB PE=1 SV=5 - [PYGB_HUMAN]	2179.82	44.25	2	25	29	64	843	96.6345	6.85889
P04899	Guanine nucleotide-binding protein G(i) subunit alpha-2 OS=Homo sapiens GN=GNAI2 PE=1 SV=3 - [GNAI2_HUMAN]	2160.68	59.44	6	9	16	51	355	40.4251	5.5415
P54652	Heat shock-related 70 kDa protein 2 OS=Homo sapiens GN=HSPA2 PE=1 SV=1 - [HSP72_HUMAN]	2118.72	17.53	1	1	10	54	639	69.9779	5.74463
O15240	Neurosecretory protein VGF OS=Homo sapiens GN=VGF PE=1 SV=2 - [VGF_HUMAN]	2095.05	37.4	1	17	17	45	615	67.2176	4.77979
Q99832	T-complex protein 1 subunit eta OS=Homo sapiens GN=CCT7 PE=1 SV=2 - [TCPH_HUMAN]	2091.21	46.04	1	19	19	41	543	59.3289	7.6499
Q13813	Spectrin alpha chain, brain OS=Homo sapiens GN=SPTAN1 PE=1 SV=3 - [SPTA2_HUMAN]	2019.05	19.46	1	34	35	53	2472	284.364	5.35107
P16671	Platelet glycoprotein 4 OS=Homo sapiens GN=CD36 PE=1 SV=2 - [CD36_HUMAN]	1997.39	31.99	1	14	14	53	472	53.0193	7.95752
P07737	Profilin-1 OS=Homo sapiens GN=PFN1 PE=1 SV=2 - [PROF1_HUMAN]	1972.62	89.29	1	10	10	55	140	15.0446	8.26514
Q01518	Adenylyl cyclase-associated protein 1 OS=Homo sapiens GN=CAP1 PE=1 SV=5 - [CAP1_HUMAN]	1940.02	41.47	1	15	15	51	475	51.8687	8.06006
P17987	T-complex protein 1 subunit alpha OS=Homo sapiens GN=TCP1 PE=1 SV=1 - [TCPA_HUMAN]	1886.94	51.62	1	20	20	44	556	60.3056	6.11279
P27348	14-3-3 protein theta OS=Homo sapiens GN=YWHAQ PE=1 SV=1 - [1433T_HUMAN]	1869.62	57.14	2	9	13	57	245	27.7468	4.77979
P43490	Nicotinamide phosphoribosyltransferase OS=Homo sapiens GN=NAMPT PE=1 SV=1 - [NAMPT_HUMAN]	1844.07	55.6	1	20	20	50	491	55.4866	7.15186
P08107	Heat shock 70 kDa protein 1A/1B OS=Homo sapiens GN=HSPA1A PE=1 SV=5 - [HSP71_HUMAN]	1817.3	42.9	2	16	19	47	641	70.009	5.65576
P29401	Transketolase OS=Homo sapiens GN=TKT PE=1 SV=3 - [TKT_HUMAN]	1794.17	32.42	1	16	16	47	623	67.8347	7.66455
Q14974	Importin subunit beta-1 OS=Homo sapiens GN=KPNB1 PE=1 SV=2 - [IMB1_HUMAN]	1790.62	36.64	1	21	21	50	876	97.108	4.77979
P60842	Eukaryotic initiation factor 4A-I OS=Homo sapiens GN=EIF4A1 PE=1 SV=1 - [IF4A1_HUMAN]	1778.01	52.46	2	8	18	43	406	46.1246	5.47803
Q9NQW6	Actin-binding protein anillin OS=Homo sapiens GN=ANLN PE=1 SV=2 - [ANLN_HUMAN]	1752	24.64	1	22	22	52	1124	124.122	8.07471
P53396	ATP-citrate synthase OS=Homo sapiens GN=ACLY PE=1 SV=3 - [ACLY_HUMAN]	1747.32	29.25	1	24	24	48	1101	120.762	7.32764
P14625	Endoplasmin OS=Homo sapiens GN=HSP90B1 PE=1 SV=1 - [ENPL_HUMAN]	1747.32	40.35	3	26	29	57	803	92.4113	4.84326
P40227	T-complex protein 1 subunit zeta OS=Homo sapiens GN=CCT6A PE=1 SV=3 - [TCPZ_HUMAN]	1744.92	47.65	1	20	20	45	531	57.9876	6.68311
P30101	Protein disulfide-isomerase A3 OS=Homo sapiens GN=PDIA3 PE=1 SV=4 - [PDIA3_HUMAN]	1732.26	43.37	1	20	20	45	505	56.7468	6.354
Q9P2B2	Prostaglandin F2 receptor negative regulator OS=Homo sapiens GN=PTGFRN PE=1 SV=2 - [FPRP_HUMAN]	1729.94	30.15	2	25	25	55	879	98.4946	6.60986
P05556	Integrin beta-1 OS=Homo sapiens GN=ITGB1 PE=1 SV=2 - [ITB1_HUMAN]	1724.57	35.09	1	20	20	44	798	88.357	5.38916
P47895	Aldehyde dehydrogenase family 1 member A3 OS=Homo sapiens GN=ALDH1A3 PE=1 SV=2 - [AL1A3_HUMAN]	1718.44	50.98	5	23	23	66	512	56.0728	7.25439
Q08431	Lactadherin OS=Homo sapiens OX=9606 GN=MFGE8 PE=1 SV=3 - [MFGM_HUMAN]	1681.3	64.34	1	20	20	51	387	43.0775	8.14795
P60174	Triosephosphate isomerase OS=Homo sapiens GN=TPI1 PE=1 SV=3 - [TPIS_HUMAN]	1673.52	58.39	1	13	13	49	286	30.7717	5.92236
Q6YHK3	CD109 antigen OS=Homo sapiens GN=CD109 PE=1 SV=2 - [CD109_HUMAN]	1662.06	26.57	1	24	24	39	1445	161.587	5.84619
P13761	HLA class II histocompatibility antigen, DRB1-7 beta chain OS=Homo sapiens GN=HLA-DRB1 PE=1 SV=1 - [2B17_HUMAN]	1656.26	59.02	11	8	12	59	266	29.803	7.44482
P08133	Annexin A6 OS=Homo sapiens GN=ANXA6 PE=1 SV=3 - [ANXA6_HUMAN]	1654.63	42.94	2	22	23	48	673	75.8256	5.60498
P50991	T-complex protein 1 subunit delta OS=Homo sapiens GN=CCT4 PE=1 SV=4 - [TCPD_HUMAN]	1648.86	50.09	1	18	19	38	539	57.8878	7.82568
P23634	Plasma membrane calcium-transporting ATPase 4 OS=Homo sapiens GN=ATP2B4 PE=1 SV=2 - [AT2B4_HUMAN]	1638.17	26.43	4	14	24	46	1241	137.833	6.59521
Q15058	Kinesin-like protein KIF14 OS=Homo sapiens GN=KIF14 PE=1 SV=1 - [KIF14_HUMAN]	1633.46	22.39	1	29	29	46	1648	186.375	7.91357
O75083	WD repeat-containing protein 1 OS=Homo sapiens GN=WDR1 PE=1 SV=4 - [WDR1_HUMAN]	1622.6	46.37	1	18	18	36	606	66.1519	6.65381
P20020	Plasma membrane calcium-transporting ATPase 1 OS=Homo sapiens OX=9606 GN=ATP2B1 PE=1 SV=4 - [AT2B1_HUMAN]	1594.47	25.9	3	13	23	48	1220	134.6	5.90967
P50395	Rab GDP dissociation inhibitor beta OS=Homo sapiens GN=GDI2 PE=1 SV=2 - [GDIB_HUMAN]	1581.57	46.29	1	11	16	37	445	50.6309	6.46826
P31939	Bifunctional purine biosynthesis protein PURH OS=Homo sapiens GN=ATIC PE=1 SV=3 - [PUR9_HUMAN]	1574.95	54.05	1	23	23	46	592	64.5753	6.7124
Q86VI3	Ras GTPase-activating-like protein IQGAP3 OS=Homo sapiens GN=IQGAP3 PE=1 SV=2 - [IQGA3_HUMAN]	1554.09	20.54	1	20	21	36	1631	184.584	7.6499
Q99536	Synaptic vesicle membrane protein VAT-1 homolog OS=Homo sapiens GN=VAT1 PE=1 SV=2 - [VAT1_HUMAN]	1544.99	43	1	12	12	36	393	41.8934	6.29053
P10809	60 kDa heat shock protein, mitochondrial OS=Homo sapiens GN=HSPD1 PE=1 SV=2 - [CH60_HUMAN]	1544.35	34.55	1	12	12	28	573	61.0164	5.87158
P62879	Guanine nucleotide-binding protein G(I)/G(S)/G(T) subunit beta-2 OS=Homo sapiens GN=GNB2 PE=1 SV=3 - [GBB2_HUMAN]	1522.77	55	15	5	15	47	340	37.3071	5.99854
P15559	NAD(P)H dehydrogenase [quinone] 1 OS=Homo sapiens GN=NQO1 PE=1 SV=1 - [NQO1_HUMAN]	1514.23	30.66	1	11	11	58	274	30.848	8.88037
P01903	HLA class II histocompatibility antigen, DR alpha chain OS=Homo sapiens GN=HLA-DRA PE=1 SV=1 - [DRA_HUMAN]	1511.32	32.28	1	5	6	37	254	28.5887	4.99561
P50990	T-complex protein 1 subunit theta OS=Homo sapiens GN=CCT8 PE=1 SV=4 - [TCPQ_HUMAN]	1510.81	50.18	1	24	24	44	548	59.5825	5.60498
P49588	Alanine--tRNA ligase, cytoplasmic OS=Homo sapiens GN=AARS PE=1 SV=2 - [SYAC_HUMAN]	1506.17	28.41	1	19	19	34	968	106.743	5.52881
Q92597	Protein NDRG1 OS=Homo sapiens GN=NDRG1 PE=1 SV=1 - [NDRG1_HUMAN]	1500.9	54.31	1	11	11	33	394	42.8077	5.8208
P11586	C-1-tetrahydrofolate synthase, cytoplasmic OS=Homo sapiens GN=MTHFD1 PE=1 SV=3 - [C1TC_HUMAN]	1496.68	33.37	1	24	25	43	935	101.495	7.29834
Q7KZF4	Staphylococcal nuclease domain-containing protein 1 OS=Homo sapiens GN=SND1 PE=1 SV=1 - [SND1_HUMAN]	1494.42	35.38	5	23	24	44	910	101.934	7.1665
P16070	CD44 antigen OS=Homo sapiens GN=CD44 PE=1 SV=3 - [CD44_HUMAN]	1491.66	10.65	1	8	8	33	742	81.4874	5.32568
Q9BUF5	Tubulin beta-6 chain OS=Homo sapiens GN=TUBB6 PE=1 SV=1 - [TBB6_HUMAN]	1480.48	45.07	1	7	16	48	446	49.825	4.88135
P51149	Ras-related protein Rab-7a OS=Homo sapiens GN=RAB7A PE=1 SV=1 - [RAB7A_HUMAN]	1461.9	64.25	1	11	11	45	207	23.4748	6.69775
P07237	Protein disulfide-isomerase OS=Homo sapiens GN=P4HB PE=1 SV=3 - [PDIA1_HUMAN]	1448.67	48.03	1	19	19	39	508	57.0807	4.86865
P09211	Glutathione S-transferase P OS=Homo sapiens GN=GSTP1 PE=1 SV=2 - [GSTP1_HUMAN]	1438.5	63.81	1	10	10	32	210	23.341	5.64307
Q15019	Septin-2 OS=Homo sapiens GN=SEPT2 PE=1 SV=1 - [SEPT2_HUMAN]	1436.72	62.88	1	15	16	36	361	41.4613	6.59521
P61981	14-3-3 protein gamma OS=Homo sapiens GN=YWHAG PE=1 SV=2 - [1433G_HUMAN]	1401.74	51.42	2	5	11	51	247	28.2849	4.89404
P02545	Prelamin-A/C OS=Homo sapiens GN=LMNA PE=1 SV=1 - [LMNA_HUMAN]	1397.08	30.57	1	20	20	33	664	74.0947	7.02002
P63241	Eukaryotic translation initiation factor 5A-1 OS=Homo sapiens GN=EIF5A PE=1 SV=2 - [IF5A1_HUMAN]	1394.24	79.22	3	9	9	32	154	16.8214	5.23682
Q16181	Septin-7 OS=Homo sapiens GN=SEPT7 PE=1 SV=2 - [SEPT7_HUMAN]	1389.85	39.82	2	13	15	38	437	50.648	8.63135
P09543	2',3'-cyclic-nucleotide 3'-phosphodiesterase OS=Homo sapiens GN=CNP PE=1 SV=2 - [CN37_HUMAN]	1388.63	52.49	3	18	18	38	421	47.5487	9.0708
P08754	Guanine nucleotide-binding protein G(k) subunit alpha OS=Homo sapiens GN=GNAI3 PE=1 SV=3 - [GNAI3_HUMAN]	1370.77	41.53	6	5	11	36	354	40.5063	5.69385
Q9UHD8	Septin-9 OS=Homo sapiens GN=SEPT9 PE=1 SV=2 - [SEPT9_HUMAN]	1368.6	46.76	14	19	20	41	586	65.3608	8.96826
P60981	Destrin OS=Homo sapiens GN=DSTN PE=1 SV=3 - [DEST_HUMAN]	1361.77	72.12	1	11	12	40	165	18.4935	7.85498
Q16658	Fascin OS=Homo sapiens GN=FSCN1 PE=1 SV=3 - [FSCN1_HUMAN]	1350.08	35.9	1	12	12	27	493	54.4961	7.23975
P06756	Integrin alpha-V OS=Homo sapiens GN=ITGAV PE=1 SV=2 - [ITAV_HUMAN]	1343.86	29.77	1	22	22	42	1048	115.964	5.68115
Q96TA1	Niban-like protein 1 OS=Homo sapiens GN=FAM129B PE=1 SV=3 - [NIBL1_HUMAN]	1342.03	35.39	1	17	17	34	746	84.0847	6.18896
O43175	D-3-phosphoglycerate dehydrogenase OS=Homo sapiens GN=PHGDH PE=1 SV=4 - [SERA_HUMAN]	1339.39	35.65	1	15	15	32	533	56.6144	6.7124
Q04917	14-3-3 protein eta OS=Homo sapiens GN=YWHAH PE=1 SV=4 - [1433F_HUMAN]	1311.54	54.88	2	8	13	51	246	28.201	4.84326
Q9Y696	Chloride intracellular channel protein 4 OS=Homo sapiens GN=CLIC4 PE=1 SV=4 - [CLIC4_HUMAN]	1289.01	60.87	3	12	13	36	253	28.7537	5.59229
Q9NVA2	Septin-11 OS=Homo sapiens GN=SEPT11 PE=1 SV=3 - [SEP11_HUMAN]	1283.38	45.22	6	13	17	43	429	49.3672	6.81494
P06744	Glucose-6-phosphate isomerase OS=Homo sapiens GN=GPI PE=1 SV=4 - [G6PI_HUMAN]	1279.61	46.95	1	17	17	38	558	63.1072	8.32373
P51148	Ras-related protein Rab-5C OS=Homo sapiens GN=RAB5C PE=1 SV=2 - [RAB5C_HUMAN]	1276.44	59.26	1	7	10	27	216	23.4678	8.41162
Q8WUM4	Programmed cell death 6-interacting protein OS=Homo sapiens GN=PDCD6IP PE=1 SV=1 - [PDC6I_HUMAN]	1274.91	33.76	1	20	20	35	868	95.9631	6.52197
P23526	Adenosylhomocysteinase OS=Homo sapiens GN=AHCY PE=1 SV=4 - [SAHH_HUMAN]	1271	39.12	1	14	16	36	432	47.6852	6.34131
P01892	HLA class I histocompatibility antigen, A-2 alpha chain OS=Homo sapiens GN=HLA-A PE=1 SV=1 - [1A02_HUMAN]	1267.97	53.97	1	0	14	44	365	40.8962	6.99072
P63092	Guanine nucleotide-binding protein G(s) subunit alpha isoforms short OS=Homo sapiens GN=GNAS PE=1 SV=1 - [GNAS2_HUMAN]	1267.48	42.13	4	11	12	42	394	45.6359	5.8208
Q14240	Eukaryotic initiation factor 4A-II OS=Homo sapiens GN=EIF4A2 PE=1 SV=2 - [IF4A2_HUMAN]	1267.26	46.68	2	5	15	32	407	46.3728	5.47803
P13667	Protein disulfide-isomerase A4 OS=Homo sapiens GN=PDIA4 PE=1 SV=2 - [PDIA4_HUMAN]	1233.93	37.67	1	20	20	43	645	72.887	5.07178
P12268	Inosine-5'-monophosphate dehydrogenase 2 OS=Homo sapiens GN=IMPDH2 PE=1 SV=2 - [IMDH2_HUMAN]	1232.77	45.33	1	15	15	33	514	55.7696	6.90283
P10316	HLA class I histocompatibility antigen, A-69 alpha chain OS=Homo sapiens GN=HLA-A PE=1 SV=2 - [1A69_HUMAN]	1225.11	50.14	2	0	13	41	365	40.9512	6.90283
P61224	Ras-related protein Rap-1b OS=Homo sapiens GN=RAP1B PE=1 SV=1 - [RAP1B_HUMAN]	1221.86	55.98	2	4	9	31	184	20.8116	5.78271
O60716	Catenin delta-1 OS=Homo sapiens GN=CTNND1 PE=1 SV=1 - [CTND1_HUMAN]	1216.16	31.4	1	22	22	39	968	108.103	6.22705
P35222	Catenin beta-1 OS=Homo sapiens GN=CTNNB1 PE=1 SV=1 - [CTNB1_HUMAN]	1197.03	35.6	1	15	19	36	781	85.4422	5.85889
P49368	T-complex protein 1 subunit gamma OS=Homo sapiens GN=CCT3 PE=1 SV=4 - [TCPG_HUMAN]	1194.48	42.2	1	18	18	38	545	60.4953	6.49365
P48643	T-complex protein 1 subunit epsilon OS=Homo sapiens GN=CCT5 PE=1 SV=1 - [TCPE_HUMAN]	1175.67	46.58	1	16	17	38	541	59.6328	5.65576
P62873	Guanine nucleotide-binding protein G(I)/G(S)/G(T) subunit beta-1 OS=Homo sapiens GN=GNB1 PE=1 SV=3 - [GBB1_HUMAN]	1174.23	45.29	15	6	13	41	340	37.353	5.99854
P13797	Plastin-3 OS=Homo sapiens GN=PLS3 PE=1 SV=4 - [PLST_HUMAN]	1169.62	41.75	3	18	18	29	630	70.7662	5.60498
Q96JB6	Lysyl oxidase homolog 4 OS=Homo sapiens GN=LOXL4 PE=1 SV=1 - [LOXL4_HUMAN]	1159.72	24.74	1	13	13	24	756	84.4291	7.45947
P62834	Ras-related protein Rap-1A OS=Homo sapiens GN=RAP1A PE=1 SV=1 - [RAP1A_HUMAN]	1155.39	48.91	1	3	8	32	184	20.9737	6.66846
P61978	Heterogeneous nuclear ribonucleoprotein K OS=Homo sapiens GN=HNRNPK PE=1 SV=1 - [HNRPK_HUMAN]	1153.1	39.74	1	14	14	29	463	50.9444	5.5415
P09382	Galectin-1 OS=Homo sapiens GN=LGALS1 PE=1 SV=2 - [LEG1_HUMAN]	1150.7	83.7	1	8	8	32	135	14.7062	5.50342
P02786	Transferrin receptor protein 1 OS=Homo sapiens GN=TFRC PE=1 SV=2 - [TFR1_HUMAN]	1149	29.08	1	18	18	31	760	84.8179	6.60986
Q9H223	EH domain-containing protein 4 OS=Homo sapiens GN=EHD4 PE=1 SV=1 - [EHD4_HUMAN]	1125.93	46.58	1	15	16	28	541	61.1365	6.75635
P62158	Calmodulin OS=Homo sapiens GN=CALM1 PE=1 SV=2 - [CALM_HUMAN]	1117.55	51.68	2	7	7	31	149	16.8268	4.22119
P46939	Utrophin OS=Homo sapiens GN=UTRN PE=1 SV=2 - [UTRO_HUMAN]	1117.45	8.16	1	19	19	29	3433	394.22	5.32568
P47756	F-actin-capping protein subunit beta OS=Homo sapiens GN=CAPZB PE=1 SV=4 - [CAPZB_HUMAN]	1109.44	56.68	1	12	12	29	277	31.3308	5.59229
P61204	ADP-ribosylation factor 3 OS=Homo sapiens GN=ARF3 PE=1 SV=2 - [ARF3_HUMAN]	1092.7	61.88	3	5	11	30	181	20.5877	7.43018
P05362	Intercellular adhesion molecule 1 OS=Homo sapiens GN=ICAM1 PE=1 SV=2 - [ICAM1_HUMAN]	1091.32	29.89	1	12	12	27	532	57.789	7.98682
P34932	Heat shock 70 kDa protein 4 OS=Homo sapiens GN=HSPA4 PE=1 SV=4 - [HSP74_HUMAN]	1084.43	28.21	2	16	17	28	840	94.2712	5.18604
Q16851	UTP--glucose-1-phosphate uridylyltransferase OS=Homo sapiens GN=UGP2 PE=1 SV=5 - [UGPA_HUMAN]	1065.15	35.24	1	14	15	34	508	56.9047	8.14795
P18669	Phosphoglycerate mutase 1 OS=Homo sapiens GN=PGAM1 PE=1 SV=2 - [PGAM1_HUMAN]	1064.85	66.14	11	12	13	33	254	28.7858	7.18115
Q9Y4I1	Unconventional myosin-Va OS=Homo sapiens GN=MYO5A PE=1 SV=2 - [MYO5A_HUMAN]	1061.08	15.36	3	22	22	37	1855	215.269	8.48486
P52292	Importin subunit alpha-2 OS=Homo sapiens GN=KPNA2 PE=1 SV=1 - [IMA2_HUMAN]	1041.99	37.43	1	14	14	23	529	57.8259	5.40186
P60660	Myosin light polypeptide 6 OS=Homo sapiens GN=MYL6 PE=1 SV=2 - [MYL6_HUMAN]	1040.78	73.51	2	9	9	31	151	16.9191	4.65283
P40121	Macrophage-capping protein OS=Homo sapiens GN=CAPG PE=1 SV=2 - [CAPG_HUMAN]	1034.82	43.1	1	10	10	25	348	38.4745	6.18896
P25705	ATP synthase subunit alpha, mitochondrial OS=Homo sapiens GN=ATP5A1 PE=1 SV=1 - [ATPA_HUMAN]	1033.99	28.57	1	13	13	22	553	59.7136	9.12939
O00571	ATP-dependent RNA helicase DDX3X OS=Homo sapiens GN=DDX3X PE=1 SV=3 - [DDX3X_HUMAN]	1029.83	31.72	2	14	15	29	662	73.198	7.18115
P26641	Elongation factor 1-gamma OS=Homo sapiens GN=EEF1G PE=1 SV=3 - [EF1G_HUMAN]	1012.11	30.21	1	15	15	34	437	50.0871	6.66846
P06576	ATP synthase subunit beta, mitochondrial OS=Homo sapiens GN=ATP5B PE=1 SV=3 - [ATPB_HUMAN]	1010.02	46.5	1	16	16	29	529	56.5246	5.40186
P16190	HLA class I histocompatibility antigen, A-33 alpha chain OS=Homo sapiens GN=HLA-A PE=1 SV=3 - [1A33_HUMAN]	999.72	38.9	6	0	10	39	365	40.8662	6.69775
O60506	Heterogeneous nuclear ribonucleoprotein Q OS=Homo sapiens GN=SYNCRIP PE=1 SV=2 - [HNRPQ_HUMAN]	997.633	28.73	1	9	13	29	623	69.5596	8.5874
P09972	Fructose-bisphosphate aldolase C OS=Homo sapiens GN=ALDOC PE=1 SV=2 - [ALDOC_HUMAN]	993.263	18.96	2	2	6	16	364	39.4312	6.87354
P22626	Heterogeneous nuclear ribonucleoproteins A2/B1 OS=Homo sapiens GN=HNRNPA2B1 PE=1 SV=2 - [ROA2_HUMAN]	988.116	33.43	2	8	9	21	353	37.4067	8.95361
P11413	Glucose-6-phosphate 1-dehydrogenase OS=Homo sapiens GN=G6PD PE=1 SV=4 - [G6PD_HUMAN]	987.235	38.64	1	17	17	30	515	59.219	6.84424
Q15582	Transforming growth factor-beta-induced protein ig-h3 OS=Homo sapiens GN=TGFBI PE=1 SV=1 - [BGH3_HUMAN]	981.239	34.99	1	14	14	23	683	74.634	7.7085
P27105	Erythrocyte band 7 integral membrane protein OS=Homo sapiens GN=STOM PE=1 SV=3 - [STOM_HUMAN]	978.245	53.47	2	11	11	26	288	31.7107	7.88428
P30041	Peroxiredoxin-6 OS=Homo sapiens GN=PRDX6 PE=1 SV=3 - [PRDX6_HUMAN]	974.023	59.82	1	12	12	27	224	25.0192	6.37939
Q86VP6	Cullin-associated NEDD8-dissociated protein 1 OS=Homo sapiens GN=CAND1 PE=1 SV=2 - [CAND1_HUMAN]	971.395	17.89	1	16	16	26	1230	136.289	5.78271
P62701	40S ribosomal protein S4, X isoform OS=Homo sapiens GN=RPS4X PE=1 SV=2 - [RS4X_HUMAN]	965.463	43.73	3	12	12	30	263	29.5791	10.1548
P30512	HLA class I histocompatibility antigen, A-29 alpha chain OS=Homo sapiens GN=HLA-A PE=2 SV=2 - [1A29_HUMAN]	962.015	37.81	2	1	9	36	365	40.8372	7.00537
Q14697	Neutral alpha-glucosidase AB OS=Homo sapiens GN=GANAB PE=1 SV=3 - [GANAB_HUMAN]	955.07	30.4	1	20	20	34	944	106.807	6.13818
O43776	Asparagine--tRNA ligase, cytoplasmic OS=Homo sapiens GN=NARS PE=1 SV=1 - [SYNC_HUMAN]	951.172	31.39	1	15	15	24	548	62.9025	6.25244
P43007	Neutral amino acid transporter A OS=Homo sapiens GN=SLC1A4 PE=1 SV=1 - [SATT_HUMAN]	950.6	25.75	1	8	8	24	532	55.6876	6.25244
Q13200	26S proteasome non-ATPase regulatory subunit 2 OS=Homo sapiens GN=PSMD2 PE=1 SV=3 - [PSMD2_HUMAN]	931.343	25.88	1	16	16	26	908	100.136	5.19873
P63010	AP-2 complex subunit beta OS=Homo sapiens GN=AP2B1 PE=1 SV=1 - [AP2B1_HUMAN]	930.259	28.71	1	11	19	32	937	104.486	5.37646
Q02952	A-kinase anchor protein 12 OS=Homo sapiens GN=AKAP12 PE=1 SV=4 - [AKA12_HUMAN]	929.138	15.77	1	15	15	28	1782	191.367	4.41162
Q9BZQ8	Protein Niban OS=Homo sapiens GN=FAM129A PE=1 SV=1 - [NIBAN_HUMAN]	927.572	25	1	17	17	27	928	103.07	4.77979
P30153	Serine/threonine-protein phosphatase 2A 65 kDa regulatory subunit A alpha isoform OS=Homo sapiens GN=PPP2R1A PE=1 SV=4 - [2AAA_HUMAN]	925.548	37.86	1	12	15	29	589	65.2669	5.10986
O43491	Band 4.1-like protein 2 OS=Homo sapiens GN=EPB41L2 PE=1 SV=1 - [E41L2_HUMAN]	923.59	29.25	2	19	22	34	1005	112.519	5.43994
P60953	Cell division control protein 42 homolog OS=Homo sapiens GN=CDC42 PE=1 SV=2 - [CDC42_HUMAN]	921.894	30.89	1	5	5	19	191	21.245	6.55127
P19338	Nucleolin OS=Homo sapiens GN=NCL PE=1 SV=3 - [NUCL_HUMAN]	911.909	19.15	1	11	11	22	710	76.5684	4.70361
P18206	Vinculin OS=Homo sapiens GN=VCL PE=1 SV=4 - [VINC_HUMAN]	901.552	19.49	1	15	15	23	1134	123.722	5.65576
P16152	Carbonyl reductase [NADPH] 1 OS=Homo sapiens GN=CBR1 PE=1 SV=3 - [CBR1_HUMAN]	897.985	57.04	2	11	11	21	277	30.3559	8.32373
P32969	60S ribosomal protein L9 OS=Homo sapiens GN=RPL9 PE=1 SV=1 - [RL9_HUMAN]	891.65	50	1	7	7	22	192	21.8498	9.94971
P63096	Guanine nucleotide-binding protein G(i) subunit alpha-1 OS=Homo sapiens GN=GNAI1 PE=1 SV=2 - [GNAI1_HUMAN]	891.252	30.79	6	2	9	29	354	40.3352	5.97314
P07942	Laminin subunit beta-1 OS=Homo sapiens GN=LAMB1 PE=1 SV=2 - [LAMB1_HUMAN]	889.977	6.77	1	8	8	18	1786	197.909	4.94482
Q6NZI2	Polymerase I and transcript release factor OS=Homo sapiens GN=PTRF PE=1 SV=1 - [PTRF_HUMAN]	886.093	24.62	1	7	7	15	390	43.4498	5.60498
P20339	Ras-related protein Rab-5A OS=Homo sapiens GN=RAB5A PE=1 SV=2 - [RAB5A_HUMAN]	880.092	47.91	1	3	7	20	215	23.6438	8.14795
P07339	Cathepsin D OS=Homo sapiens GN=CTSD PE=1 SV=1 - [CATD_HUMAN]	870.52	37.14	1	11	11	27	412	44.5236	6.53662
P13647	Keratin, type II cytoskeletal 5 OS=Homo sapiens GN=KRT5 PE=1 SV=3 - [K2C5_HUMAN]	866.309	19.66	7	6	11	25	590	62.34	7.73779
P30459	HLA class I histocompatibility antigen, A-74 alpha chain OS=Homo sapiens GN=HLA-A PE=1 SV=1 - [1A74_HUMAN]	865.812	35.07	2	0	9	36	365	40.8651	6.46826
P02533	Keratin, type I cytoskeletal 14 OS=Homo sapiens GN=KRT14 PE=1 SV=4 - [K1C14_HUMAN]	858.397	40.47	7	8	16	21	472	51.5294	5.16064
P61586	Transforming protein RhoA OS=Homo sapiens GN=RHOA PE=1 SV=1 - [RHOA_HUMAN]	856.75	65.8	1	2	10	25	193	21.7541	6.1001
P54709	Sodium/potassium-transporting ATPase subunit beta-3 OS=Homo sapiens GN=ATP1B3 PE=1 SV=1 - [AT1B3_HUMAN]	856.529	40.5	1	10	10	30	279	31.4921	8.35303
P25398	40S ribosomal protein S12 OS=Homo sapiens GN=RPS12 PE=1 SV=3 - [RS12_HUMAN]	849.933	43.94	1	4	4	16	132	14.5055	7.21045
P22102	Trifunctional purine biosynthetic protein adenosine-3 OS=Homo sapiens GN=GART PE=1 SV=1 - [PUR2_HUMAN]	845.951	20	1	14	14	21	1010	107.699	6.69775
Q9HAV0	Guanine nucleotide-binding protein subunit beta-4 OS=Homo sapiens GN=GNB4 PE=1 SV=3 - [GBB4_HUMAN]	834.812	40.29	8	4	10	29	340	37.543	5.99854
Q15907	Ras-related protein Rab-11B OS=Homo sapiens GN=RAB11B PE=1 SV=4 - [RB11B_HUMAN]	834.171	50.46	2	10	10	20	218	24.4735	5.93506
P27797	Calreticulin OS=Homo sapiens GN=CALR PE=1 SV=1 - [CALR_HUMAN]	831.377	36.21	1	10	10	26	417	48.1118	4.43701
P09486	SPARC OS=Homo sapiens GN=SPARC PE=1 SV=1 - [SPRC_HUMAN]	828.74	44.55	1	11	11	29	303	34.6097	4.84326
P61106	Ras-related protein Rab-14 OS=Homo sapiens GN=RAB14 PE=1 SV=4 - [RAB14_HUMAN]	827.966	58.6	1	9	9	19	215	23.8819	6.21436
P26640	Valine--tRNA ligase OS=Homo sapiens GN=VARS PE=1 SV=4 - [SYVC_HUMAN]	823.849	14.24	1	13	13	25	1264	140.387	7.59131
P26006	Integrin alpha-3 OS=Homo sapiens GN=ITGA3 PE=1 SV=5 - [ITA3_HUMAN]	822.375	16.37	1	13	13	24	1051	116.538	6.771
O75874	Isocitrate dehydrogenase [NADP] cytoplasmic OS=Homo sapiens GN=IDH1 PE=1 SV=2 - [IDHC_HUMAN]	821.669	36.23	1	11	12	20	414	46.6295	7.00537
O43795	Unconventional myosin-Ib OS=Homo sapiens GN=MYO1B PE=2 SV=3 - [MYO1B_HUMAN]	818.214	17.52	2	13	13	21	1136	131.902	9.37842
P08865	40S ribosomal protein SA OS=Homo sapiens GN=RPSA PE=1 SV=4 - [RSSA_HUMAN]	815.412	45.08	2	9	10	18	295	32.8334	4.86865
Q15084	Protein disulfide-isomerase A6 OS=Homo sapiens GN=PDIA6 PE=1 SV=1 - [PDIA6_HUMAN]	815.271	26.14	1	7	7	19	440	48.0913	5.08447
P30520	Adenylosuccinate synthetase isozyme 2 OS=Homo sapiens GN=ADSS PE=1 SV=3 - [PURA2_HUMAN]	814.807	32.24	2	10	10	19	456	50.0658	6.55127
P55060	Exportin-2 OS=Homo sapiens GN=CSE1L PE=1 SV=3 - [XPO2_HUMAN]	803.167	19.77	1	13	13	22	971	110.346	5.77002
P06748	Nucleophosmin OS=Homo sapiens GN=NPM1 PE=1 SV=2 - [NPM_HUMAN]	802.488	22.45	1	5	5	16	294	32.5548	4.77979
Q9BSJ8	Extended synaptotagmin-1 OS=Homo sapiens GN=ESYT1 PE=1 SV=1 - [ESYT1_HUMAN]	800.417	23.28	1	17	17	25	1104	122.78	5.8335
P15531	Nucleoside diphosphate kinase A OS=Homo sapiens GN=NME1 PE=1 SV=1 - [NDKA_HUMAN]	794.498	58.55	1	3	7	25	152	17.1377	6.18896
O14950	Myosin regulatory light chain 12B OS=Homo sapiens GN=MYL12B PE=1 SV=2 - [ML12B_HUMAN]	789.41	80.23	3	10	10	19	172	19.7665	4.84326
P38606	V-type proton ATPase catalytic subunit A OS=Homo sapiens GN=ATP6V1A PE=1 SV=2 - [VATA_HUMAN]	781.863	35.66	1	18	18	27	617	68.2605	5.51611
P22392	Nucleoside diphosphate kinase B OS=Homo sapiens GN=NME2 PE=1 SV=1 - [NDKB_HUMAN]	780.661	65.13	2	4	8	28	152	17.2869	8.41162
Q06210	Glucosamine--fructose-6-phosphate aminotransferase [isomerizing] 1 OS=Homo sapiens GN=GFPT1 PE=1 SV=3 - [GFPT1_HUMAN]	777.34	26.61	2	12	12	22	699	78.7563	7.10791
Q9Y4L1	Hypoxia up-regulated protein 1 OS=Homo sapiens GN=HYOU1 PE=1 SV=1 - [HYOU1_HUMAN]	775.025	19.12	1	12	12	18	999	111.266	5.22412
P11940	Polyadenylate-binding protein 1 OS=Homo sapiens GN=PABPC1 PE=1 SV=2 - [PABP1_HUMAN]	772.61	29.09	4	8	13	21	636	70.6259	9.49561
P07814	Bifunctional glutamate/proline--tRNA ligase OS=Homo sapiens GN=EPRS PE=1 SV=5 - [SYEP_HUMAN]	768.339	11.64	1	13	13	24	1512	170.483	7.32764
P12004	Proliferating cell nuclear antigen OS=Homo sapiens GN=PCNA PE=1 SV=1 - [PCNA_HUMAN]	765.91	45.21	1	7	7	20	261	28.7503	4.69092
P04259	Keratin, type II cytoskeletal 6B OS=Homo sapiens GN=KRT6B PE=1 SV=5 - [K2C6B_HUMAN]	764.594	13.3	7	1	7	19	564	60.0303	8.00146
Q99497	Protein DJ-1 OS=Homo sapiens GN=PARK7 PE=1 SV=2 - [PARK7_HUMAN]	762.048	78.84	1	12	12	22	189	19.8785	6.78564
P45974	Ubiquitin carboxyl-terminal hydrolase 5 OS=Homo sapiens GN=USP5 PE=1 SV=2 - [UBP5_HUMAN]	761.894	17.25	1	10	10	18	858	95.7253	5.03369
Q16363	Laminin subunit alpha-4 OS=Homo sapiens GN=LAMA4 PE=1 SV=4 - [LAMA4_HUMAN]	760.062	12.4	1	16	16	24	1823	202.397	6.27783
Q29974	HLA class II histocompatibility antigen, DRB1-16 beta chain OS=Homo sapiens GN=HLA-DRB1 PE=1 SV=1 - [2B1G_HUMAN]	758.717	27.82	7	1	4	18	266	30.011	7.73779
Q99829	Copine-1 OS=Homo sapiens GN=CPNE1 PE=1 SV=1 - [CPNE1_HUMAN]	750.118	18.99	1	8	8	22	537	59.0215	5.8335
P40926	Malate dehydrogenase, mitochondrial OS=Homo sapiens GN=MDH2 PE=1 SV=3 - [MDHM_HUMAN]	748.037	38.76	1	9	9	18	338	35.4807	8.67529
O75054	Immunoglobulin superfamily member 3 OS=Homo sapiens GN=IGSF3 PE=1 SV=3 - [IGSF3_HUMAN]	747.118	16.08	1	14	14	18	1194	135.112	6.07471
P41091	Eukaryotic translation initiation factor 2 subunit 3 OS=Homo sapiens GN=EIF2S3 PE=1 SV=3 - [IF2G_HUMAN]	743.833	44.07	2	14	14	25	472	51.0772	8.39697
P17655	Calpain-2 catalytic subunit OS=Homo sapiens GN=CAPN2 PE=1 SV=6 - [CAN2_HUMAN]	743.347	36.43	1	16	16	23	700	79.9448	4.98291
P47897	Glutamine--tRNA ligase OS=Homo sapiens GN=QARS PE=1 SV=1 - [SYQ_HUMAN]	739.642	21.94	1	12	12	22	775	87.7429	7.15186
P23396	40S ribosomal protein S3 OS=Homo sapiens GN=RPS3 PE=1 SV=2 - [RS3_HUMAN]	735.794	57.61	1	12	12	24	243	26.6714	9.65674
P31943	Heterogeneous nuclear ribonucleoprotein H OS=Homo sapiens GN=HNRNPH1 PE=1 SV=4 - [HNRH1_HUMAN]	735.656	26.06	1	2	8	17	449	49.1984	6.30322
Q14699	Raftlin OS=Homo sapiens GN=RFTN1 PE=1 SV=4 - [RFTN1_HUMAN]	734.232	38.93	1	12	12	21	578	63.1065	5.66846
P41250	Glycine--tRNA ligase OS=Homo sapiens GN=GARS PE=1 SV=3 - [SYG_HUMAN]	729.408	25.98	1	11	11	22	739	83.1126	7.03467
Q9Y6E0	Serine/threonine-protein kinase 24 OS=Homo sapiens GN=STK24 PE=1 SV=1 - [STK24_HUMAN]	720.938	29.8	1	6	9	20	443	49.2773	5.69385
P62424	60S ribosomal protein L7a OS=Homo sapiens GN=RPL7A PE=1 SV=2 - [RL7A_HUMAN]	719.717	32.33	1	9	9	20	266	29.977	10.6089
O95239	Chromosome-associated kinesin KIF4A OS=Homo sapiens GN=KIF4A PE=1 SV=3 - [KIF4A_HUMAN]	718.078	20.7	4	18	19	27	1232	139.794	6.26514
P05106	Integrin beta-3 OS=Homo sapiens GN=ITGB3 PE=1 SV=2 - [ITB3_HUMAN]	711.224	19.92	1	12	12	18	788	87.0004	5.23682
P18085	ADP-ribosylation factor 4 OS=Homo sapiens GN=ARF4 PE=1 SV=3 - [ARF4_HUMAN]	708.217	56.11	1	5	9	23	180	20.4977	7.13721
P12956	X-ray repair cross-complementing protein 6 OS=Homo sapiens GN=XRCC6 PE=1 SV=2 - [XRCC6_HUMAN]	705.349	28.74	2	14	14	22	609	69.7991	6.63916
O15144	Actin-related protein 2/3 complex subunit 2 OS=Homo sapiens GN=ARPC2 PE=1 SV=1 - [ARPC2_HUMAN]	703.351	47.67	1	12	12	22	300	34.3115	7.35693
P17301	Integrin alpha-2 OS=Homo sapiens GN=ITGA2 PE=1 SV=1 - [ITA2_HUMAN]	701.351	10.16	1	9	9	16	1181	129.214	5.31299
P52907	F-actin-capping protein subunit alpha-1 OS=Homo sapiens GN=CAPZA1 PE=1 SV=3 - [CAZA1_HUMAN]	698.573	43.71	2	9	9	16	286	32.9023	5.69385
P61158	Actin-related protein 3 OS=Homo sapiens GN=ACTR3 PE=1 SV=3 - [ARP3_HUMAN]	697.226	41.87	3	12	12	26	418	47.341	5.88428
O43852	Calumenin OS=Homo sapiens GN=CALU PE=1 SV=2 - [CALU_HUMAN]	694.79	38.41	1	9	9	19	315	37.0835	4.64014
P84085	ADP-ribosylation factor 5 OS=Homo sapiens GN=ARF5 PE=1 SV=2 - [ARF5_HUMAN]	690.811	50	2	2	8	19	180	20.5166	6.78564
P13489	Ribonuclease inhibitor OS=Homo sapiens GN=RNH1 PE=1 SV=2 - [RINI_HUMAN]	689.685	29.5	1	8	8	16	461	49.9411	4.81787
P08134	Rho-related GTP-binding protein RhoC OS=Homo sapiens GN=RHOC PE=1 SV=1 - [RHOC_HUMAN]	685.902	65.8	1	2	10	24	193	21.9923	6.58057
O00560	Syntenin-1 OS=Homo sapiens GN=SDCBP PE=1 SV=1 - [SDCB1_HUMAN]	685.366	44.97	1	8	8	20	298	32.4239	7.53271
P37802	Transgelin-2 OS=Homo sapiens GN=TAGLN2 PE=1 SV=3 - [TAGL2_HUMAN]	685.27	51.26	2	8	8	15	199	22.3772	8.25049
P16188	HLA class I histocompatibility antigen, A-30 alpha chain OS=Homo sapiens GN=HLA-A PE=1 SV=2 - [1A30_HUMAN]	685.246	32.05	3	0	8	21	365	40.8792	6.1001
P15880	40S ribosomal protein S2 OS=Homo sapiens GN=RPS2 PE=1 SV=2 - [RS2_HUMAN]	684.02	37.54	1	9	9	23	293	31.3046	10.2427
P22234	Multifunctional protein ADE2 OS=Homo sapiens GN=PAICS PE=1 SV=3 - [PUR6_HUMAN]	682.378	28	1	11	11	18	425	47.0491	7.2251
Q92499	ATP-dependent RNA helicase DDX1 OS=Homo sapiens GN=DDX1 PE=1 SV=2 - [DDX1_HUMAN]	679.624	20.27	1	10	10	20	740	82.3798	7.2251
P61160	Actin-related protein 2 OS=Homo sapiens GN=ACTR2 PE=1 SV=1 - [ARP2_HUMAN]	678.999	37.56	1	11	12	24	394	44.7322	6.7417
Q96KP4	Cytosolic non-specific dipeptidase OS=Homo sapiens GN=CNDP2 PE=1 SV=2 - [CNDP2_HUMAN]	677.519	38.74	1	13	13	21	475	52.8449	5.97314
P30447	HLA class I histocompatibility antigen, A-23 alpha chain OS=Homo sapiens GN=HLA-A PE=1 SV=1 - [1A23_HUMAN]	675.113	35.34	3	0	8	19	365	40.7071	6.34131
Q9Y3F4	Serine-threonine kinase receptor-associated protein OS=Homo sapiens GN=STRAP PE=1 SV=1 - [STRAP_HUMAN]	674.803	34.29	1	9	9	17	350	38.414	5.12256
Q9Y265	RuvB-like 1 OS=Homo sapiens GN=RUVBL1 PE=1 SV=1 - [RUVB1_HUMAN]	664.108	33.77	1	11	11	19	456	50.1963	6.41748
Q9Y678	Coatomer subunit gamma OS=Homo sapiens GN=COPG PE=1 SV=1 - [COPG_HUMAN]	652.107	19.34	2	11	11	18	874	97.6555	5.46533
Q9Y281	Cofilin-2 OS=Homo sapiens GN=CFL2 PE=1 SV=1 - [COF2_HUMAN]	651.189	53.61	1	4	8	18	166	18.7249	7.88428
Q9H0U4	Ras-related protein Rab-1B OS=Homo sapiens GN=RAB1B PE=1 SV=1 - [RAB1B_HUMAN]	648.214	38.81	3	3	7	16	201	22.1572	5.73193
P62136	Serine/threonine-protein phosphatase PP1-alpha catalytic subunit OS=Homo sapiens GN=PPP1CA PE=1 SV=1 - [PP1A_HUMAN]	646.057	33.94	1	3	9	22	330	37.4878	6.32861
P62140	Serine/threonine-protein phosphatase PP1-beta catalytic subunit OS=Homo sapiens GN=PPP1CB PE=1 SV=3 - [PP1B_HUMAN]	642.52	27.22	1	2	7	18	327	37.1626	6.18896
Q9Y4K0	Lysyl oxidase homolog 2 OS=Homo sapiens GN=LOXL2 PE=1 SV=1 - [LOXL2_HUMAN]	640.102	15.76	1	8	8	16	774	86.6683	6.37939
Q01813	6-phosphofructokinase type C OS=Homo sapiens GN=PFKP PE=1 SV=2 - [K6PP_HUMAN]	639.29	21.17	1	11	13	21	784	85.5415	7.54736
P31150	Rab GDP dissociation inhibitor alpha OS=Homo sapiens GN=GDI1 PE=1 SV=2 - [GDIA_HUMAN]	639.082	30.87	1	4	9	18	447	50.5501	5.13525
P29692	Elongation factor 1-delta OS=Homo sapiens GN=EEF1D PE=1 SV=5 - [EF1D_HUMAN]	635.125	39.86	1	8	8	15	281	31.1028	5.0083
P50454	Serpin H1 OS=Homo sapiens GN=SERPINH1 PE=1 SV=2 - [SERPH_HUMAN]	634.055	22.25	1	6	6	14	418	46.4112	8.68994
P23381	Tryptophan--tRNA ligase, cytoplasmic OS=Homo sapiens GN=WARS PE=1 SV=2 - [SYWC_HUMAN]	628.153	33.76	1	12	12	16	471	53.1316	6.22705
P55209	Nucleosome assembly protein 1-like 1 OS=Homo sapiens GN=NAP1L1 PE=1 SV=1 - [NP1L1_HUMAN]	626.218	17.14	1	4	5	16	391	45.3459	4.4624
P19022	Cadherin-2 OS=Homo sapiens GN=CDH2 PE=1 SV=4 - [CADH2_HUMAN]	624.444	21.3	2	12	12	22	906	99.7473	4.80518
Q86UX2	Inter-alpha-trypsin inhibitor heavy chain H5 OS=Homo sapiens GN=ITIH5 PE=2 SV=2 - [ITIH5_HUMAN]	622.457	23.14	1	16	16	27	942	104.512	8.27979
Q86W92	Liprin-beta-1 OS=Homo sapiens GN=PPFIBP1 PE=1 SV=2 - [LIPB1_HUMAN]	622.046	13.85	2	10	10	18	1011	113.952	5.5542
P18465	HLA class I histocompatibility antigen, B-57 alpha chain OS=Homo sapiens GN=HLA-B PE=1 SV=1 - [1B57_HUMAN]	620.689	26.8	2	0	6	20	362	40.1989	6.30322
P05198	Eukaryotic translation initiation factor 2 subunit 1 OS=Homo sapiens GN=EIF2S1 PE=1 SV=3 - [IF2A_HUMAN]	619.507	48.89	1	13	14	21	315	36.0894	5.08447
P01111	GTPase NRas OS=Homo sapiens GN=NRAS PE=1 SV=1 - [RASN_HUMAN]	612.553	58.2	2	2	8	15	189	21.2155	5.17334
P31948	Stress-induced-phosphoprotein 1 OS=Homo sapiens GN=STIP1 PE=1 SV=1 - [STIP1_HUMAN]	611.656	27.07	1	12	12	23	543	62.5994	6.80029
P10321	HLA class I histocompatibility antigen, Cw-7 alpha chain OS=Homo sapiens GN=HLA-C PE=1 SV=3 - [1C07_HUMAN]	607.271	28.42	1	1	7	19	366	40.6229	6.03662
P36871	Phosphoglucomutase-1 OS=Homo sapiens GN=PGM1 PE=1 SV=3 - [PGM1_HUMAN]	605.179	23.49	1	10	10	19	562	61.4105	6.75635
P05388	60S acidic ribosomal protein P0 OS=Homo sapiens GN=RPLP0 PE=1 SV=1 - [RLA0_HUMAN]	603.032	42.27	2	9	9	18	317	34.2518	5.97314
O00186	Syntaxin-binding protein 3 OS=Homo sapiens GN=STXBP3 PE=1 SV=2 - [STXB3_HUMAN]	602.893	16.55	1	8	8	13	592	67.7208	7.79639
P02649	Apolipoprotein E OS=Homo sapiens GN=APOE PE=1 SV=1 - [APOE_HUMAN]	602.89	35.33	1	9	9	15	317	36.1318	5.73193
P02787	Serotransferrin OS=Homo sapiens GN=TF PE=1 SV=3 - [TRFE_HUMAN]	602.614	21.2	7	11	12	22	698	77.0136	7.12256
P23284	Peptidyl-prolyl cis-trans isomerase B OS=Homo sapiens GN=PPIB PE=1 SV=2 - [PPIB_HUMAN]	601.591	45.83	1	10	10	19	216	23.7275	9.40771
O95782	AP-2 complex subunit alpha-1 OS=Homo sapiens GN=AP2A1 PE=1 SV=3 - [AP2A1_HUMAN]	598.371	17.09	1	9	11	15	977	107.478	7.03467
O43865	Putative adenosylhomocysteinase 2 OS=Homo sapiens GN=AHCYL1 PE=1 SV=2 - [SAHH2_HUMAN]	598.314	25.09	2	10	12	18	530	58.9134	6.88818
P04632	Calpain small subunit 1 OS=Homo sapiens GN=CAPNS1 PE=1 SV=1 - [CPNS1_HUMAN]	597.081	44.03	2	7	7	14	268	28.2977	5.19873
P0CG48	Polyubiquitin-C OS=Homo sapiens GN=UBC PE=1 SV=3 - [UBC_HUMAN]	596.051	70.95	4	7	7	22	685	76.9915	7.66455
P27708	CAD protein OS=Homo sapiens GN=CAD PE=1 SV=3 - [PYR1_HUMAN]	594.338	6.43	1	11	11	16	2225	242.829	6.45557
P62191	26S protease regulatory subunit 4 OS=Homo sapiens GN=PSMC1 PE=1 SV=1 - [PRS4_HUMAN]	591.349	28.18	1	9	10	16	440	49.1537	6.21436
Q16881	Thioredoxin reductase 1, cytoplasmic OS=Homo sapiens GN=TXNRD1 PE=1 SV=3 - [TRXR1_HUMAN]	591.232	23.57	2	10	10	16	649	70.8622	7.38623
P53621	Coatomer subunit alpha OS=Homo sapiens GN=COPA PE=1 SV=2 - [COPA_HUMAN]	590.289	12.91	1	13	13	17	1224	138.258	7.66455
P18463	HLA class I histocompatibility antigen, B-37 alpha chain OS=Homo sapiens GN=HLA-B PE=2 SV=1 - [1B37_HUMAN]	584.003	29.28	21	0	7	21	362	40.4311	6.15088
P49591	Serine--tRNA ligase, cytoplasmic OS=Homo sapiens GN=SARS PE=1 SV=3 - [SYSC_HUMAN]	583.656	31.91	1	11	11	17	514	58.7401	6.43018
Q13884	Beta-1-syntrophin OS=Homo sapiens GN=SNTB1 PE=1 SV=3 - [SNTB1_HUMAN]	580.182	24.91	1	9	9	18	538	58.0251	8.63135
Q9ULV4	Coronin-1C OS=Homo sapiens GN=CORO1C PE=1 SV=1 - [COR1C_HUMAN]	576.497	21.52	1	8	8	17	474	53.2151	7.07861
P61247	40S ribosomal protein S3a OS=Homo sapiens GN=RPS3A PE=1 SV=2 - [RS3A_HUMAN]	575.575	34.47	1	9	9	16	264	29.9257	9.72998
P62820	Ras-related protein Rab-1A OS=Homo sapiens GN=RAB1A PE=1 SV=3 - [RAB1A_HUMAN]	574.962	49.76	3	3	7	13	205	22.6634	6.21436
P30461	HLA class I histocompatibility antigen, B-13 alpha chain OS=Homo sapiens GN=HLA-B PE=1 SV=1 - [1B13_HUMAN]	573.345	32.87	8	2	7	21	362	40.449	6.13818
P60903	Protein S100-A10 OS=Homo sapiens GN=S100A10 PE=1 SV=2 - [S10AA_HUMAN]	571.737	35.05	1	3	3	21	97	11.1955	7.37158
P33176	Kinesin-1 heavy chain OS=Homo sapiens GN=KIF5B PE=1 SV=1 - [KINH_HUMAN]	570.459	17.34	3	12	12	18	963	109.617	6.50732
Q02878	60S ribosomal protein L6 OS=Homo sapiens GN=RPL6 PE=1 SV=3 - [RL6_HUMAN]	564.378	24.31	1	7	7	16	288	32.7076	10.5796
O60711	Leupaxin OS=Homo sapiens GN=LPXN PE=1 SV=1 - [LPXN_HUMAN]	562.943	25.13	1	7	7	15	386	43.3035	6.01123
Q7Z794	Keratin, type II cytoskeletal 1b OS=Homo sapiens GN=KRT77 PE=1 SV=3 - [K2C1B_HUMAN]	560.302	6.75	6	1	4	13	578	61.8635	5.98584
Q15365	Poly(rC)-binding protein 1 OS=Homo sapiens GN=PCBP1 PE=1 SV=2 - [PCBP1_HUMAN]	555.242	33.71	1	5	7	15	356	37.4739	7.09326
Q29960	HLA class I histocompatibility antigen, Cw-16 alpha chain OS=Homo sapiens GN=HLA-C PE=2 SV=1 - [1C16_HUMAN]	550.525	25.41	2	1	6	14	366	40.7271	6.53662
P30508	HLA class I histocompatibility antigen, Cw-12 alpha chain OS=Homo sapiens GN=HLA-C PE=1 SV=2 - [1C12_HUMAN]	549.59	25.41	9	1	6	15	366	40.8601	6.30322
P21281	V-type proton ATPase subunit B, brain isoform OS=Homo sapiens GN=ATP6V1B2 PE=1 SV=3 - [VATB2_HUMAN]	548.676	28.77	2	9	9	16	511	56.4649	5.80811
O00410	Importin-5 OS=Homo sapiens GN=IPO5 PE=1 SV=4 - [IPO5_HUMAN]	544.258	10.57	2	8	8	17	1097	123.55	4.94482
O76003	Glutaredoxin-3 OS=Homo sapiens GN=GLRX3 PE=1 SV=2 - [GLRX3_HUMAN]	536.019	33.13	1	8	8	14	335	37.4082	5.38916
Q92598	Heat shock protein 105 kDa OS=Homo sapiens GN=HSPH1 PE=1 SV=1 - [HS105_HUMAN]	535.947	14.1	2	8	9	13	858	96.8037	5.38916
P14868	Aspartate--tRNA ligase, cytoplasmic OS=Homo sapiens GN=DARS PE=1 SV=2 - [SYDC_HUMAN]	533.717	28.74	1	12	12	19	501	57.1	6.55127
P20039	HLA class II histocompatibility antigen, DRB1-11 beta chain OS=Homo sapiens GN=HLA-DRB1 PE=1 SV=1 - [2B1B_HUMAN]	530.044	20.68	3	1	3	14	266	30.141	7.18115
P40925	Malate dehydrogenase, cytoplasmic OS=Homo sapiens GN=MDH1 PE=1 SV=4 - [MDHC_HUMAN]	527.013	26.65	1	7	7	14	334	36.403	7.35693
Q00796	Sorbitol dehydrogenase OS=Homo sapiens GN=SORD PE=1 SV=4 - [DHSO_HUMAN]	526.055	25.49	1	6	6	14	357	38.2998	7.97217
Q9UBI6	Guanine nucleotide-binding protein G(I)/G(S)/G(O) subunit gamma-12 OS=Homo sapiens GN=GNG12 PE=1 SV=3 - [GBG12_HUMAN]	522.261	44.44	1	3	3	13	72	8.00117	8.96826
P36873	Serine/threonine-protein phosphatase PP1-gamma catalytic subunit OS=Homo sapiens GN=PPP1CC PE=1 SV=1 - [PP1G_HUMAN]	521.462	26.01	1	1	7	16	323	36.9597	6.53662
Q16555	Dihydropyrimidinase-related protein 2 OS=Homo sapiens GN=DPYSL2 PE=1 SV=1 - [DPYL2_HUMAN]	520.381	29.02	2	9	10	13	572	62.2546	6.37939
P04271	Protein S100-B OS=Homo sapiens GN=S100B PE=1 SV=2 - [S100B_HUMAN]	519.606	40.22	1	3	3	13	92	10.7061	4.58936
P51991	Heterogeneous nuclear ribonucleoprotein A3 OS=Homo sapiens GN=HNRNPA3 PE=1 SV=2 - [ROA3_HUMAN]	517.899	26.46	2	7	8	17	378	39.5706	9.01221
P01112	GTPase HRas OS=Homo sapiens GN=HRAS PE=1 SV=1 - [RASH_HUMAN]	517.781	61.9	1	2	8	13	189	21.2846	5.31299
O94804	Serine/threonine-protein kinase 10 OS=Homo sapiens GN=STK10 PE=1 SV=1 - [STK10_HUMAN]	516.569	14.57	1	10	11	18	968	112.065	6.94678
P56537	Eukaryotic translation initiation factor 6 OS=Homo sapiens GN=EIF6 PE=1 SV=1 - [IF6_HUMAN]	515.138	26.94	1	4	4	12	245	26.5822	4.67822
P48637	Glutathione synthetase OS=Homo sapiens GN=GSS PE=1 SV=1 - [GSHB_HUMAN]	508.433	22.78	1	7	7	10	474	52.3523	5.92236
P61225	Ras-related protein Rap-2b OS=Homo sapiens GN=RAP2B PE=1 SV=1 - [RAP2B_HUMAN]	508.352	49.18	2	3	6	11	183	20.4912	4.80518
P46777	60S ribosomal protein L5 OS=Homo sapiens GN=RPL5 PE=1 SV=3 - [RL5_HUMAN]	507.068	25.25	1	7	7	16	297	34.3407	9.71533
Q9UQ80	Proliferation-associated protein 2G4 OS=Homo sapiens GN=PA2G4 PE=1 SV=3 - [PA2G4_HUMAN]	504.297	25.63	1	8	8	16	394	43.7592	6.55127
O75534	Cold shock domain-containing protein E1 OS=Homo sapiens GN=CSDE1 PE=1 SV=2 - [CSDE1_HUMAN]	502.821	15.41	1	11	11	17	798	88.8289	6.25244
P22061	Protein-L-isoaspartate(D-aspartate) O-methyltransferase OS=Homo sapiens GN=PCMT1 PE=1 SV=4 - [PIMT_HUMAN]	502.674	46.7	1	8	8	16	227	24.6206	7.21045
P0CW22	40S ribosomal protein S17-like OS=Homo sapiens GN=RPS17L PE=3 SV=1 - [RS17L_HUMAN]	498.419	40.74	1	4	4	13	135	15.5404	9.84717
Q13310	Polyadenylate-binding protein 4 OS=Homo sapiens GN=PABPC4 PE=1 SV=1 - [PABP4_HUMAN]	497.668	14.75	1	1	6	9	644	70.7381	9.26123
P62241	40S ribosomal protein S8 OS=Homo sapiens GN=RPS8 PE=1 SV=2 - [RS8_HUMAN]	497.404	34.62	1	7	7	14	208	24.1902	10.3159
P52565	Rho GDP-dissociation inhibitor 1 OS=Homo sapiens GN=ARHGDIA PE=1 SV=3 - [GDIR1_HUMAN]	497.304	59.8	1	6	6	17	204	23.1927	5.10986
P06737	Glycogen phosphorylase, liver form OS=Homo sapiens GN=PYGL PE=1 SV=4 - [PYGL_HUMAN]	496.689	11.69	1	4	8	13	847	97.087	7.1665
Q00839	Heterogeneous nuclear ribonucleoprotein U OS=Homo sapiens GN=HNRNPU PE=1 SV=6 - [HNRPU_HUMAN]	494.335	12.85	1	7	7	13	825	90.528	5.99854
P17931	Galectin-3 OS=Homo sapiens GN=LGALS3 PE=1 SV=5 - [LEG3_HUMAN]	492.742	35.2	1	7	7	17	250	26.1361	8.55811
P61764	Syntaxin-binding protein 1 OS=Homo sapiens GN=STXBP1 PE=1 SV=1 - [STXB1_HUMAN]	491.026	21.55	1	10	10	16	594	67.5259	6.96143
P21266	Glutathione S-transferase Mu 3 OS=Homo sapiens GN=GSTM3 PE=1 SV=3 - [GSTM3_HUMAN]	490.055	32.44	2	5	6	11	225	26.5421	5.5415
P08572	Collagen alpha-2(IV) chain OS=Homo sapiens GN=COL4A2 PE=1 SV=4 - [CO4A2_HUMAN]	489.175	7.89	1	8	8	13	1712	167.449	8.66064
P05026	Sodium/potassium-transporting ATPase subunit beta-1 OS=Homo sapiens GN=ATP1B1 PE=1 SV=1 - [AT1B1_HUMAN]	487.058	42.24	1	10	10	23	303	35.0389	8.52881
O95373	Importin-7 OS=Homo sapiens GN=IPO7 PE=1 SV=1 - [IPO7_HUMAN]	485.744	15.61	1	11	11	16	1038	119.44	4.81787
P07947	Tyrosine-protein kinase Yes OS=Homo sapiens GN=YES1 PE=1 SV=3 - [YES_HUMAN]	484.377	23.57	23	4	10	20	543	60.7625	6.7417
P29966	Myristoylated alanine-rich C-kinase substrate OS=Homo sapiens GN=MARCKS PE=1 SV=4 - [MARCS_HUMAN]	483.094	22.89	1	4	4	12	332	31.5359	4.44971
P13693	Translationally-controlled tumor protein OS=Homo sapiens GN=TPT1 PE=1 SV=1 - [TCTP_HUMAN]	482.371	74.42	2	7	7	13	172	19.5826	4.93213
P11908	Ribose-phosphate pyrophosphokinase 2 OS=Homo sapiens GN=PRPS2 PE=1 SV=2 - [PRPS2_HUMAN]	481.457	29.25	1	3	7	14	318	34.747	6.60986
Q12913	Receptor-type tyrosine-protein phosphatase eta OS=Homo sapiens GN=PTPRJ PE=1 SV=3 - [PTPRJ_HUMAN]	479.092	9.2	1	9	9	10	1337	145.851	5.57959
P11234	Ras-related protein Ral-B OS=Homo sapiens GN=RALB PE=1 SV=1 - [RALB_HUMAN]	479.068	44.17	1	2	6	14	206	23.3939	6.62451
P78539	Sushi repeat-containing protein SRPX OS=Homo sapiens GN=SRPX PE=2 SV=1 - [SRPX_HUMAN]	477.142	18.75	1	7	7	13	464	51.5381	8.66064
Q9NPH3	Interleukin-1 receptor accessory protein OS=Homo sapiens GN=IL1RAP PE=1 SV=2 - [IL1AP_HUMAN]	475.701	14.74	1	8	8	14	570	65.3767	8.11865
P43686	26S protease regulatory subunit 6B OS=Homo sapiens GN=PSMC4 PE=1 SV=2 - [PRS6B_HUMAN]	469.631	31.1	1	8	8	18	418	47.3365	5.21143
Q14344	Guanine nucleotide-binding protein subunit alpha-13 OS=Homo sapiens GN=GNA13 PE=1 SV=2 - [GNA13_HUMAN]	468.807	19.36	2	6	7	18	377	44.0217	8.00146
P32119	Peroxiredoxin-2 OS=Homo sapiens GN=PRDX2 PE=1 SV=5 - [PRDX2_HUMAN]	468.214	32.83	1	6	7	17	198	21.8782	5.97314
Q9NUQ9	Protein FAM49B OS=Homo sapiens GN=FAM49B PE=1 SV=1 - [FA49B_HUMAN]	466.779	18.83	1	4	4	7	324	36.7246	6.06201
P17858	6-phosphofructokinase, liver type OS=Homo sapiens GN=PFKL PE=1 SV=6 - [K6PL_HUMAN]	464.392	12.95	1	5	7	12	780	84.9642	7.50342
P08779	Keratin, type I cytoskeletal 16 OS=Homo sapiens GN=KRT16 PE=1 SV=4 - [K1C16_HUMAN]	463.816	30.87	6	5	13	15	473	51.2362	5.04639
P35613	Basigin OS=Homo sapiens GN=BSG PE=1 SV=2 - [BASI_HUMAN]	461.08	19.48	1	5	5	11	385	42.1741	5.65576
P07858	Cathepsin B OS=Homo sapiens GN=CTSB PE=1 SV=3 - [CATB_HUMAN]	460.097	22.42	1	6	6	14	339	37.7968	6.30322
Q15366	Poly(rC)-binding protein 2 OS=Homo sapiens GN=PCBP2 PE=1 SV=1 - [PCBP2_HUMAN]	458.541	26.58	2	4	6	12	365	38.5556	6.78564
P55795	Heterogeneous nuclear ribonucleoprotein H2 OS=Homo sapiens GN=HNRNPH2 PE=1 SV=1 - [HNRH2_HUMAN]	457.918	21.83	1	2	7	13	449	49.2323	6.30322
O15031	Plexin-B2 OS=Homo sapiens GN=PLXNB2 PE=1 SV=3 - [PLXB2_HUMAN]	456.689	8.71	1	12	12	16	1838	204.997	6.23975
P43034	Platelet-activating factor acetylhydrolase IB subunit alpha OS=Homo sapiens GN=PAFAH1B1 PE=1 SV=2 - [LIS1_HUMAN]	454.56	31.95	1	8	9	15	410	46.6082	7.37158
P16615	Sarcoplasmic/endoplasmic reticulum calcium ATPase 2 OS=Homo sapiens GN=ATP2A2 PE=1 SV=1 - [AT2A2_HUMAN]	452.453	13.05	3	9	9	13	1042	114.683	5.33838
Q9Y6E2	Basic leucine zipper and W2 domain-containing protein 2 OS=Homo sapiens GN=BZW2 PE=1 SV=1 - [BZW2_HUMAN]	449.881	17.42	1	5	6	12	419	48.132	6.68311
Q12765	Secernin-1 OS=Homo sapiens GN=SCRN1 PE=1 SV=2 - [SCRN1_HUMAN]	448.515	20.53	1	6	6	14	414	46.3525	4.75439
O75116	Rho-associated protein kinase 2 OS=Homo sapiens GN=ROCK2 PE=1 SV=4 - [ROCK2_HUMAN]	443.079	10.01	1	7	12	16	1388	160.799	6.02393
Q9P2J5	Leucine--tRNA ligase, cytoplasmic OS=Homo sapiens GN=LARS PE=1 SV=2 - [SYLC_HUMAN]	442.923	8.93	1	8	8	10	1176	134.379	7.29834
P63000	Ras-related C3 botulinum toxin substrate 1 OS=Homo sapiens GN=RAC1 PE=1 SV=1 - [RAC1_HUMAN]	441.785	32.29	3	7	7	19	192	21.4362	8.49951
P60033	CD81 antigen OS=Homo sapiens GN=CD81 PE=1 SV=1 - [CD81_HUMAN]	441.464	25	1	3	3	7	236	25.7921	5.2876
P30044	Peroxiredoxin-5, mitochondrial OS=Homo sapiens GN=PRDX5 PE=1 SV=4 - [PRDX5_HUMAN]	441.027	48.13	1	8	8	15	214	22.0725	8.70459
P48444	Coatomer subunit delta OS=Homo sapiens GN=ARCN1 PE=1 SV=1 - [COPD_HUMAN]	438.696	18.59	1	10	10	16	511	57.1741	6.21436
P30050	60S ribosomal protein L12 OS=Homo sapiens GN=RPL12 PE=1 SV=1 - [RL12_HUMAN]	433.465	43.03	1	5	5	8	165	17.8075	9.42236
P28066	Proteasome subunit alpha type-5 OS=Homo sapiens GN=PSMA5 PE=1 SV=3 - [PSA5_HUMAN]	431.986	42.32	1	8	8	13	241	26.3942	4.79248
Q969P0	Immunoglobulin superfamily member 8 OS=Homo sapiens GN=IGSF8 PE=1 SV=1 - [IGSF8_HUMAN]	431.273	12.89	1	7	7	13	613	64.9935	8.00146
P61020	Ras-related protein Rab-5B OS=Homo sapiens GN=RAB5B PE=1 SV=1 - [RAB5B_HUMAN]	428.679	32.56	1	2	5	11	215	23.6919	8.1333
Q9UHD1	Cysteine and histidine-rich domain-containing protein 1 OS=Homo sapiens GN=CHORDC1 PE=1 SV=2 - [CHRD1_HUMAN]	425.274	18.37	1	5	5	14	332	37.4656	7.86963
Q9P0V9	Septin-10 OS=Homo sapiens GN=SEPT10 PE=1 SV=2 - [SEP10_HUMAN]	424.385	32.16	1	8	8	11	454	52.5596	6.80029
Q7L576	Cytoplasmic FMR1-interacting protein 1 OS=Homo sapiens GN=CYFIP1 PE=1 SV=1 - [CYFP1_HUMAN]	424.38	12.05	2	11	11	15	1253	145.089	6.90283
P63244	Guanine nucleotide-binding protein subunit beta-2-like 1 OS=Homo sapiens GN=GNB2L1 PE=1 SV=3 - [GBLP_HUMAN]	424.11	41.01	1	10	10	16	317	35.0546	7.69385
P13762	HLA class II histocompatibility antigen, DR beta 4 chain OS=Homo sapiens GN=HLA-DRB4 PE=1 SV=2 - [DRB4_HUMAN]	423.157	40.23	1	5	6	13	266	29.9219	7.32764
P30481	HLA class I histocompatibility antigen, B-44 alpha chain OS=Homo sapiens GN=HLA-B PE=1 SV=1 - [1B44_HUMAN]	422.724	22.1	2	1	5	14	362	40.4561	6.03662
P10768	S-formylglutathione hydrolase OS=Homo sapiens GN=ESD PE=1 SV=2 - [ESTD_HUMAN]	421.661	23.76	1	4	4	9	282	31.4425	7.02002
Q8NEM2	SHC SH2 domain-binding protein 1 OS=Homo sapiens GN=SHCBP1 PE=1 SV=3 - [SHCBP_HUMAN]	421.578	19.79	1	9	9	13	672	75.6422	4.75439
P50148	Guanine nucleotide-binding protein G(q) subunit alpha OS=Homo sapiens GN=GNAQ PE=1 SV=4 - [GNAQ_HUMAN]	421.293	26.74	1	4	7	12	359	42.1153	5.68115
P55884	Eukaryotic translation initiation factor 3 subunit B OS=Homo sapiens GN=EIF3B PE=1 SV=3 - [EIF3B_HUMAN]	420.022	12.16	1	9	9	13	814	92.4238	4.99561
Q15758	Neutral amino acid transporter B(0) OS=Homo sapiens GN=SLC1A5 PE=1 SV=2 - [AAAT_HUMAN]	418.622	8.13	1	3	3	10	541	56.5623	5.47803
P11166	Solute carrier family 2, facilitated glucose transporter member 1 OS=Homo sapiens GN=SLC2A1 PE=1 SV=2 - [GTR1_HUMAN]	418.406	11.38	1	5	6	14	492	54.0485	8.71924
O14980	Exportin-1 OS=Homo sapiens GN=XPO1 PE=1 SV=1 - [XPO1_HUMAN]	417.53	11.3	1	7	7	11	1071	123.306	6.06201
O14744	Protein arginine N-methyltransferase 5 OS=Homo sapiens GN=PRMT5 PE=1 SV=4 - [ANM5_HUMAN]	413.215	19.31	1	10	10	15	637	72.6376	6.29053
P27824	Calnexin OS=Homo sapiens GN=CANX PE=1 SV=2 - [CALX_HUMAN]	412.93	14.86	1	7	7	15	592	67.5259	4.60205
Q9P265	Disco-interacting protein 2 homolog B OS=Homo sapiens GN=DIP2B PE=1 SV=3 - [DIP2B_HUMAN]	409.45	8.88	1	9	10	14	1576	171.382	8.08936
O00425	Insulin-like growth factor 2 mRNA-binding protein 3 OS=Homo sapiens GN=IGF2BP3 PE=1 SV=2 - [IF2B3_HUMAN]	409.038	8.64	2	2	4	9	579	63.6656	8.86572
P11047	Laminin subunit gamma-1 OS=Homo sapiens GN=LAMC1 PE=1 SV=3 - [LAMC1_HUMAN]	408.786	7.77	1	9	9	11	1609	177.489	5.12256
P04792	Heat shock protein beta-1 OS=Homo sapiens GN=HSPB1 PE=1 SV=2 - [HSPB1_HUMAN]	405.75	44.88	1	6	6	10	205	22.7685	6.40479
P60900	Proteasome subunit alpha type-6 OS=Homo sapiens GN=PSMA6 PE=1 SV=1 - [PSA6_HUMAN]	405.393	24.8	1	5	5	10	246	27.3818	6.75635
Q13838	Spliceosome RNA helicase DDX39B OS=Homo sapiens GN=DDX39B PE=1 SV=1 - [DX39B_HUMAN]	404.418	21.03	2	2	8	15	428	48.9599	5.66846
O95425	Supervillin OS=Homo sapiens GN=SVIL PE=1 SV=2 - [SVIL_HUMAN]	404.412	4.29	1	7	7	12	2214	247.593	6.97607
Q10567	AP-1 complex subunit beta-1 OS=Homo sapiens GN=AP1B1 PE=1 SV=2 - [AP1B1_HUMAN]	402.965	12.22	1	2	10	13	949	104.57	5.05908
P28482	Mitogen-activated protein kinase 1 OS=Homo sapiens GN=MAPK1 PE=1 SV=3 - [MK01_HUMAN]	399.723	27.5	4	9	9	13	360	41.3632	6.97607
P50914	60S ribosomal protein L14 OS=Homo sapiens GN=RPL14 PE=1 SV=4 - [RL14_HUMAN]	395.701	16.28	1	3	3	8	215	23.417	10.9312
Q8NBS9	Thioredoxin domain-containing protein 5 OS=Homo sapiens GN=TXNDC5 PE=1 SV=2 - [TXND5_HUMAN]	394.855	22.22	1	8	8	15	432	47.5987	5.97314
P13798	Acylamino-acid-releasing enzyme OS=Homo sapiens GN=APEH PE=1 SV=4 - [ACPH_HUMAN]	392.956	18.31	1	9	9	13	732	81.1726	5.47803
O75955	Flotillin-1 OS=Homo sapiens GN=FLOT1 PE=1 SV=3 - [FLOT1_HUMAN]	391.758	21.31	1	6	6	8	427	47.3256	7.48877
Q86UX7	Fermitin family homolog 3 OS=Homo sapiens GN=FERMT3 PE=1 SV=1 - [URP2_HUMAN]	389.092	16.34	1	6	6	10	667	75.905	6.97607
P61221	ATP-binding cassette sub-family E member 1 OS=Homo sapiens GN=ABCE1 PE=1 SV=1 - [ABCE1_HUMAN]	388.901	10.02	1	4	4	8	599	67.271	8.33838
O15143	Actin-related protein 2/3 complex subunit 1B OS=Homo sapiens GN=ARPC1B PE=1 SV=3 - [ARC1B_HUMAN]	388.78	30.38	1	6	7	10	372	40.9234	8.35303
Q92599	Septin-8 OS=Homo sapiens GN=SEPT8 PE=1 SV=4 - [SEPT8_HUMAN]	385.11	19.25	2	4	8	18	483	55.7211	6.27783
P07910	Heterogeneous nuclear ribonucleoproteins C1/C2 OS=Homo sapiens GN=HNRNPC PE=1 SV=4 - [HNRPC_HUMAN]	383.987	21.57	4	6	6	10	306	33.6495	5.08447
Q9P289	Serine/threonine-protein kinase MST4 OS=Homo sapiens GN=MST4 PE=1 SV=2 - [MST4_HUMAN]	383.303	21.15	1	2	6	11	416	46.4996	5.2876
P39023	60S ribosomal protein L3 OS=Homo sapiens GN=RPL3 PE=1 SV=2 - [RL3_HUMAN]	383.246	28.78	1	9	9	15	403	46.0798	10.1841
P50995	Annexin A11 OS=Homo sapiens GN=ANXA11 PE=1 SV=1 - [ANX11_HUMAN]	383.012	15.45	2	6	7	12	505	54.3551	7.6499
Q7L2H7	Eukaryotic translation initiation factor 3 subunit M OS=Homo sapiens GN=EIF3M PE=1 SV=1 - [EIF3M_HUMAN]	380.823	20.05	1	4	4	6	374	42.4758	5.63037
Q03135	Caveolin-1 OS=Homo sapiens GN=CAV1 PE=1 SV=4 - [CAV1_HUMAN]	379.865	25.28	2	4	4	8	178	20.4585	6.02393
O75131	Copine-3 OS=Homo sapiens GN=CPNE3 PE=1 SV=1 - [CPNE3_HUMAN]	379.54	17.88	7	7	8	17	537	60.0921	5.84619
P02768	Serum albumin OS=Homo sapiens GN=ALB PE=1 SV=2 - [ALBU_HUMAN]	379.26	5.58	1	4	4	11	609	69.3215	6.27783
P13010	X-ray repair cross-complementing protein 5 OS=Homo sapiens GN=XRCC5 PE=1 SV=3 - [XRCC5_HUMAN]	378.533	23.91	1	9	9	14	732	82.6523	5.80811
P62280	40S ribosomal protein S11 OS=Homo sapiens GN=RPS11 PE=1 SV=3 - [RS11_HUMAN]	377.835	46.2	1	9	9	15	158	18.419	10.3013
P60891	Ribose-phosphate pyrophosphokinase 1 OS=Homo sapiens GN=PRPS1 PE=1 SV=2 - [PRPS1_HUMAN]	376.589	20.13	2	1	5	11	318	34.8119	6.97607
P50570	Dynamin-2 OS=Homo sapiens GN=DNM2 PE=1 SV=2 - [DYN2_HUMAN]	374.719	16.67	2	10	10	12	870	98.0032	7.44482
A0FGR8	Extended synaptotagmin-2 OS=Homo sapiens GN=ESYT2 PE=1 SV=1 - [ESYT2_HUMAN]	374.395	10.86	1	6	6	7	921	102.294	9.26123
P28070	Proteasome subunit beta type-4 OS=Homo sapiens GN=PSMB4 PE=1 SV=4 - [PSB4_HUMAN]	374.233	23.11	1	3	3	6	264	29.1855	5.97314
P50502	Hsc70-interacting protein OS=Homo sapiens GN=ST13 PE=1 SV=2 - [F10A1_HUMAN]	373.977	18.43	3	6	6	11	369	41.3055	5.2749
P52209	6-phosphogluconate dehydrogenase, decarboxylating OS=Homo sapiens GN=PGD PE=1 SV=3 - [6PGD_HUMAN]	373.646	24.22	1	8	8	11	483	53.106	7.2251
P54920	Alpha-soluble NSF attachment protein OS=Homo sapiens GN=NAPA PE=1 SV=3 - [SNAA_HUMAN]	373.277	29.15	2	7	7	11	295	33.2113	5.36377
Q99460	26S proteasome non-ATPase regulatory subunit 1 OS=Homo sapiens GN=PSMD1 PE=1 SV=2 - [PSMD1_HUMAN]	371.721	12.07	1	8	8	12	953	105.769	5.38916
P61006	Ras-related protein Rab-8A OS=Homo sapiens GN=RAB8A PE=1 SV=1 - [RAB8A_HUMAN]	370.62	28.99	6	2	6	14	207	23.6532	9.0708
P62753	40S ribosomal protein S6 OS=Homo sapiens GN=RPS6 PE=1 SV=1 - [RS6_HUMAN]	369.237	28.11	1	6	6	10	249	28.663	10.8433
Q06830	Peroxiredoxin-1 OS=Homo sapiens GN=PRDX1 PE=1 SV=1 - [PRDX1_HUMAN]	368.104	42.71	1	5	7	14	199	22.0963	8.1333
P67809	Nuclease-sensitive element-binding protein 1 OS=Homo sapiens GN=YBX1 PE=1 SV=3 - [YBOX1_HUMAN]	367.28	20.68	3	4	4	6	324	35.9027	9.87646
P13591	Neural cell adhesion molecule 1 OS=Homo sapiens GN=NCAM1 PE=1 SV=3 - [NCAM1_HUMAN]	364.557	7.69	1	5	5	12	858	94.5152	4.86865
P54577	Tyrosine--tRNA ligase, cytoplasmic OS=Homo sapiens GN=YARS PE=1 SV=4 - [SYYC_HUMAN]	364.099	20.08	1	9	9	13	528	59.1061	7.04932
P62841	40S ribosomal protein S15 OS=Homo sapiens GN=RPS15 PE=1 SV=2 - [RS15_HUMAN]	363.232	24.14	1	3	3	11	145	17.0292	10.3892
P36578	60S ribosomal protein L4 OS=Homo sapiens GN=RPL4 PE=1 SV=5 - [RL4_HUMAN]	362.364	18.97	1	7	7	15	427	47.6674	11.063
P53985	Monocarboxylate transporter 1 OS=Homo sapiens GN=SLC16A1 PE=1 SV=3 - [MOT1_HUMAN]	362.31	6	1	2	2	8	500	53.9089	8.66064
P05090	Apolipoprotein D OS=Homo sapiens GN=APOD PE=1 SV=1 - [APOD_HUMAN]	362.02	30.69	1	5	5	10	189	21.2618	5.14795
P62330	ADP-ribosylation factor 6 OS=Homo sapiens GN=ARF6 PE=1 SV=2 - [ARF6_HUMAN]	361.304	42.29	2	5	6	13	175	20.0694	8.95361
Q08380	Galectin-3-binding protein OS=Homo sapiens GN=LGALS3BP PE=1 SV=1 - [LG3BP_HUMAN]	361.037	12.31	1	6	6	12	585	65.2893	5.2749
Q9Y6M7	Sodium bicarbonate cotransporter 3 OS=Homo sapiens GN=SLC4A7 PE=1 SV=2 - [S4A7_HUMAN]	360.941	6.34	2	5	5	7	1214	135.957	6.7124
O75165	DnaJ homolog subfamily C member 13 OS=Homo sapiens GN=DNAJC13 PE=1 SV=5 - [DJC13_HUMAN]	360.19	4.68	1	6	6	8	2243	254.252	6.7417
Q5ZPR3	CD276 antigen OS=Homo sapiens GN=CD276 PE=1 SV=1 - [CD276_HUMAN]	358.649	10.11	1	3	3	7	534	57.1995	4.90674
Q92616	Translational activator GCN1 OS=Homo sapiens GN=GCN1L1 PE=1 SV=6 - [GCN1L_HUMAN]	358.587	5.65	1	9	9	11	2671	292.572	7.47412
Q30167	HLA class II histocompatibility antigen, DRB1-10 beta chain OS=Homo sapiens GN=HLA-DRB1 PE=1 SV=2 - [2B1A_HUMAN]	357.163	8.27	1	1	2	8	266	29.9831	7.75244
P11233	Ras-related protein Ral-A OS=Homo sapiens GN=RALA PE=1 SV=1 - [RALA_HUMAN]	355.581	37.86	1	2	6	12	206	23.552	7.10791
O00764	Pyridoxal kinase OS=Homo sapiens GN=PDXK PE=1 SV=1 - [PDXK_HUMAN]	355.54	14.74	1	3	3	8	312	35.0799	6.12549
Q96CW1	AP-2 complex subunit mu OS=Homo sapiens GN=AP2M1 PE=1 SV=2 - [AP2M1_HUMAN]	354.022	17.7	1	7	7	14	435	49.623	9.53955
P08138	Tumor necrosis factor receptor superfamily member 16 OS=Homo sapiens GN=NGFR PE=1 SV=1 - [TNR16_HUMAN]	352.98	28.34	1	6	6	7	427	45.1543	4.70361
P35998	26S protease regulatory subunit 7 OS=Homo sapiens GN=PSMC2 PE=1 SV=3 - [PRS7_HUMAN]	352.623	31.18	1	10	10	14	433	48.6031	5.94775
P54136	Arginine--tRNA ligase, cytoplasmic OS=Homo sapiens GN=RARS PE=1 SV=2 - [SYRC_HUMAN]	351.783	12.12	1	6	6	11	660	75.3309	6.68311
P35606	Coatomer subunit beta' OS=Homo sapiens GN=COPB2 PE=1 SV=2 - [COPB2_HUMAN]	351.012	13.13	1	8	8	11	906	102.422	5.2749
O14818	Proteasome subunit alpha type-7 OS=Homo sapiens GN=PSMA7 PE=1 SV=1 - [PSA7_HUMAN]	349.696	33.06	2	7	7	11	248	27.8696	8.45557
O94985	Calsyntenin-1 OS=Homo sapiens GN=CLSTN1 PE=1 SV=1 - [CSTN1_HUMAN]	349.615	5.4	1	4	4	8	981	109.724	4.90674
P06241	Tyrosine-protein kinase Fyn OS=Homo sapiens GN=FYN PE=1 SV=3 - [FYN_HUMAN]	349.391	17.5	21	5	9	16	537	60.7234	6.66846
P30086	Phosphatidylethanolamine-binding protein 1 OS=Homo sapiens GN=PEBP1 PE=1 SV=3 - [PEBP1_HUMAN]	349.287	35.83	1	3	3	4	187	21.0437	7.53271
Q99598	Translin-associated protein X OS=Homo sapiens GN=TSNAX PE=1 SV=1 - [TSNAX_HUMAN]	349.13	22.41	1	4	4	8	290	33.0917	6.55127
O14617	AP-3 complex subunit delta-1 OS=Homo sapiens GN=AP3D1 PE=1 SV=1 - [AP3D1_HUMAN]	348.394	3.64	1	3	3	8	1153	130.076	8.48486
Q13347	Eukaryotic translation initiation factor 3 subunit I OS=Homo sapiens GN=EIF3I PE=1 SV=1 - [EIF3I_HUMAN]	348.206	27.08	1	6	6	13	325	36.4786	5.64307
P17812	CTP synthase 1 OS=Homo sapiens GN=CTPS PE=1 SV=2 - [PYRG1_HUMAN]	348.041	10.66	4	4	5	9	591	66.648	6.45557
P62826	GTP-binding nuclear protein Ran OS=Homo sapiens GN=RAN PE=1 SV=3 - [RAN_HUMAN]	347.268	32.41	1	6	6	10	216	24.4076	7.48877
O75396	Vesicle-trafficking protein SEC22b OS=Homo sapiens GN=SEC22B PE=1 SV=4 - [SC22B_HUMAN]	347.171	24.65	1	4	4	7	215	24.5775	6.91748
Q99733	Nucleosome assembly protein 1-like 4 OS=Homo sapiens GN=NAP1L4 PE=1 SV=1 - [NP1L4_HUMAN]	344.757	22.93	1	5	6	13	375	42.7969	4.69092
P29992	Guanine nucleotide-binding protein subunit alpha-11 OS=Homo sapiens GN=GNA11 PE=1 SV=2 - [GNA11_HUMAN]	344.587	19.78	2	3	7	11	359	42.0965	5.69385
Q04721	Neurogenic locus notch homolog protein 2 OS=Homo sapiens GN=NOTCH2 PE=1 SV=3 - [NOTC2_HUMAN]	344.22	4.73	1	7	7	10	2471	265.226	5.13525
O43390	Heterogeneous nuclear ribonucleoprotein R OS=Homo sapiens GN=HNRNPR PE=1 SV=1 - [HNRPR_HUMAN]	343.529	13.59	1	4	8	11	633	70.8993	8.1333
P04844	Dolichyl-diphosphooligosaccharide--protein glycosyltransferase subunit 2 OS=Homo sapiens GN=RPN2 PE=1 SV=3 - [RPN2_HUMAN]	341.76	19.02	1	8	8	10	631	69.241	5.69385
Q9Y6M1	Insulin-like growth factor 2 mRNA-binding protein 2 OS=Homo sapiens GN=IGF2BP2 PE=1 SV=2 - [IF2B2_HUMAN]	341.386	5.68	2	1	3	8	599	66.0806	8.45557
Q9NQC3	Reticulon-4 OS=Homo sapiens GN=RTN4 PE=1 SV=2 - [RTN4_HUMAN]	340.75	5.79	1	4	4	8	1192	129.851	4.50049
P55786	Puromycin-sensitive aminopeptidase OS=Homo sapiens GN=NPEPPS PE=1 SV=2 - [PSA_HUMAN]	339.473	11.32	2	8	8	12	919	103.211	5.71924
Q14247	Src substrate cortactin OS=Homo sapiens GN=CTTN PE=1 SV=2 - [SRC8_HUMAN]	338.727	12.55	1	5	5	7	550	61.5485	5.40186
P20645	Cation-dependent mannose-6-phosphate receptor OS=Homo sapiens GN=M6PR PE=1 SV=1 - [MPRD_HUMAN]	337.859	16.61	1	3	3	5	277	30.9734	5.8335
Q14764	Major vault protein OS=Homo sapiens GN=MVP PE=1 SV=4 - [MVP_HUMAN]	336.545	13.77	1	8	8	12	893	99.2659	5.47803
P21359	Neurofibromin OS=Homo sapiens GN=NF1 PE=1 SV=2 - [NF1_HUMAN]	336.317	4.12	1	6	6	10	2839	319.168	7.38623
P35237	Serpin B6 OS=Homo sapiens GN=SERPINB6 PE=1 SV=3 - [SPB6_HUMAN]	335.042	21.01	1	5	5	9	376	42.5941	5.2749
P26599	Polypyrimidine tract-binding protein 1 OS=Homo sapiens GN=PTBP1 PE=1 SV=1 - [PTBP1_HUMAN]	335.02	10.55	1	3	3	6	531	57.1856	9.17334
Q9Y617	Phosphoserine aminotransferase OS=Homo sapiens GN=PSAT1 PE=1 SV=2 - [SERC_HUMAN]	334.964	30.81	1	9	9	13	370	40.3968	7.66455
P62249	40S ribosomal protein S16 OS=Homo sapiens GN=RPS16 PE=1 SV=2 - [RS16_HUMAN]	334.496	41.1	1	6	6	12	146	16.435	10.2134
P49411	Elongation factor Tu, mitochondrial OS=Homo sapiens GN=TUFM PE=1 SV=2 - [EFTU_HUMAN]	333.181	14.38	1	4	4	9	452	49.5102	7.60596
P27635	60S ribosomal protein L10 OS=Homo sapiens GN=RPL10 PE=1 SV=4 - [RL10_HUMAN]	332.26	41.59	2	9	9	16	214	24.5879	10.0815
P48681	Nestin OS=Homo sapiens GN=NES PE=1 SV=2 - [NEST_HUMAN]	328.969	5	1	7	7	10	1621	177.332	4.36084
Q9Y230	RuvB-like 2 OS=Homo sapiens GN=RUVBL2 PE=1 SV=3 - [RUVB2_HUMAN]	328.252	27.86	1	8	8	12	463	51.1246	5.64307
Q13765	Nascent polypeptide-associated complex subunit alpha OS=Homo sapiens GN=NACA PE=1 SV=1 - [NACA_HUMAN]	327.327	25.58	3	4	4	9	215	23.3697	4.56396
Q14019	Coactosin-like protein OS=Homo sapiens GN=COTL1 PE=1 SV=3 - [COTL1_HUMAN]	326.066	30.99	1	5	5	11	142	15.935	5.66846
O00148	ATP-dependent RNA helicase DDX39A OS=Homo sapiens GN=DDX39A PE=1 SV=2 - [DX39A_HUMAN]	324.045	15.22	1	1	6	12	427	49.098	5.68115
P25787	Proteasome subunit alpha type-2 OS=Homo sapiens GN=PSMA2 PE=1 SV=2 - [PSA2_HUMAN]	323.515	38.03	1	5	5	8	234	25.8823	7.43018
P62906	60S ribosomal protein L10a OS=Homo sapiens GN=RPL10A PE=1 SV=2 - [RL10A_HUMAN]	322.98	33.18	1	7	7	15	217	24.8155	9.93506
Q14152	Eukaryotic translation initiation factor 3 subunit A OS=Homo sapiens GN=EIF3A PE=1 SV=1 - [EIF3A_HUMAN]	322.829	10.85	1	10	10	12	1382	166.468	6.78564
P18124	60S ribosomal protein L7 OS=Homo sapiens GN=RPL7 PE=1 SV=1 - [RL7_HUMAN]	321.888	31.05	1	8	8	17	248	29.2072	10.6528
P46782	40S ribosomal protein S5 OS=Homo sapiens GN=RPS5 PE=1 SV=4 - [RS5_HUMAN]	319.645	24.02	1	4	4	8	204	22.8621	9.71533
Q02809	Procollagen-lysine,2-oxoglutarate 5-dioxygenase 1 OS=Homo sapiens GN=PLOD1 PE=1 SV=2 - [PLOD1_HUMAN]	317.906	9.77	1	5	5	9	727	83.4974	6.94678
P38646	Stress-70 protein, mitochondrial OS=Homo sapiens GN=HSPA9 PE=1 SV=2 - [GRP75_HUMAN]	317.094	14.58	1	8	9	14	679	73.6348	6.16357
O00161	Synaptosomal-associated protein 23 OS=Homo sapiens GN=SNAP23 PE=1 SV=1 - [SNP23_HUMAN]	315.9	32.23	1	4	4	7	211	23.3395	5.0083
P08123	Collagen alpha-2(I) chain OS=Homo sapiens GN=COL1A2 PE=1 SV=7 - [CO1A2_HUMAN]	315.463	4.83	1	6	6	7	1366	129.235	8.95361
P24534	Elongation factor 1-beta OS=Homo sapiens GN=EEF1B2 PE=1 SV=3 - [EF1B_HUMAN]	315.057	39.11	1	5	5	9	225	24.7483	4.66553
Q13492	Phosphatidylinositol-binding clathrin assembly protein OS=Homo sapiens GN=PICALM PE=1 SV=2 - [PICAL_HUMAN]	314.542	15.18	2	7	7	9	652	70.71	7.89893
P16035	Metalloproteinase inhibitor 2 OS=Homo sapiens GN=TIMP2 PE=1 SV=2 - [TIMP2_HUMAN]	314.147	17.27	1	3	3	7	220	24.3831	7.48877
Q9NTK5	Obg-like ATPase 1 OS=Homo sapiens GN=OLA1 PE=1 SV=2 - [OLA1_HUMAN]	313.746	23.23	1	7	7	9	396	44.7153	7.81104
P21796	Voltage-dependent anion-selective channel protein 1 OS=Homo sapiens GN=VDAC1 PE=1 SV=2 - [VDAC1_HUMAN]	313.577	32.16	2	7	7	9	283	30.7536	8.54346
Q01650	Large neutral amino acids transporter small subunit 1 OS=Homo sapiens GN=SLC7A5 PE=1 SV=2 - [LAT1_HUMAN]	313.276	8.09	1	3	3	7	507	54.9743	7.72314
O14556	Glyceraldehyde-3-phosphate dehydrogenase, testis-specific OS=Homo sapiens GN=GAPDHS PE=1 SV=2 - [G3PT_HUMAN]	308.46	21.32	1	6	7	16	408	44.4728	8.19189
P62269	40S ribosomal protein S18 OS=Homo sapiens GN=RPS18 PE=1 SV=3 - [RS18_HUMAN]	306.794	32.89	1	5	5	9	152	17.7079	10.9897
P01906	HLA class II histocompatibility antigen, DQ alpha 2 chain OS=Homo sapiens GN=HLA-DQA2 PE=1 SV=2 - [DQA2_HUMAN]	306.353	11.37	1	1	2	11	255	28.015	4.88135
P46783	40S ribosomal protein S10 OS=Homo sapiens GN=RPS10 PE=1 SV=1 - [RS10_HUMAN]	306.266	28.48	2	4	4	10	165	18.8859	10.1548
Q8WWM9	Cytoglobin OS=Homo sapiens GN=CYGB PE=1 SV=1 - [CYGB_HUMAN]	306.161	44.21	1	7	7	11	190	21.391	6.80029
P62495	Eukaryotic peptide chain release factor subunit 1 OS=Homo sapiens GN=ETF1 PE=1 SV=3 - [ERF1_HUMAN]	305.224	15.79	1	6	6	8	437	49.0002	5.70654
Q9NY33	Dipeptidyl peptidase 3 OS=Homo sapiens GN=DPP3 PE=1 SV=2 - [DPP3_HUMAN]	304.603	11.94	1	6	6	7	737	82.5378	5.09717
P07996	Thrombospondin-1 OS=Homo sapiens GN=THBS1 PE=1 SV=2 - [TSP1_HUMAN]	302.884	7.35	1	5	5	8	1170	129.3	4.94482
Q8NE71	ATP-binding cassette sub-family F member 1 OS=Homo sapiens GN=ABCF1 PE=1 SV=2 - [ABCF1_HUMAN]	302.77	12.78	1	6	6	8	845	95.8665	6.80029
Q05655	Protein kinase C delta type OS=Homo sapiens GN=PRKCD PE=1 SV=2 - [KPCD_HUMAN]	300.015	16.12	1	10	10	14	676	77.4549	7.75244
P05141	ADP/ATP translocase 2 OS=Homo sapiens GN=SLC25A5 PE=1 SV=7 - [ADT2_HUMAN]	299.626	16.44	3	2	5	12	298	32.8312	9.68604
P07954	Fumarate hydratase, mitochondrial OS=Homo sapiens GN=FH PE=1 SV=3 - [FUMH_HUMAN]	298.12	11.57	1	4	4	5	510	54.6022	8.76318
Q14160	Protein scribble homolog OS=Homo sapiens GN=SCRIB PE=1 SV=4 - [SCRIB_HUMAN]	297.877	5.64	1	5	6	8	1630	174.778	5.07178
P17980	26S protease regulatory subunit 6A OS=Homo sapiens GN=PSMC3 PE=1 SV=3 - [PRS6A_HUMAN]	297.261	20.5	1	6	6	9	439	49.1725	5.23682
P46781	40S ribosomal protein S9 OS=Homo sapiens GN=RPS9 PE=1 SV=3 - [RS9_HUMAN]	295.243	31.44	1	8	8	16	194	22.5776	10.6528
O75044	SLIT-ROBO Rho GTPase-activating protein 2 OS=Homo sapiens GN=SRGAP2 PE=1 SV=3 - [SRGP2_HUMAN]	294.813	6.54	4	5	5	7	1071	120.795	6.69775
Q99613	Eukaryotic translation initiation factor 3 subunit C OS=Homo sapiens GN=EIF3C PE=1 SV=1 - [EIF3C_HUMAN]	294.325	5.48	2	4	4	6	913	105.278	5.68115
O14974	Protein phosphatase 1 regulatory subunit 12A OS=Homo sapiens GN=PPP1R12A PE=1 SV=1 - [MYPT1_HUMAN]	293.213	3.88	1	2	2	5	1030	115.211	5.40186
P49006	MARCKS-related protein OS=Homo sapiens GN=MARCKSL1 PE=1 SV=2 - [MRP_HUMAN]	292.957	48.21	1	4	4	5	195	19.5172	4.66553
Q92930	Ras-related protein Rab-8B OS=Homo sapiens GN=RAB8B PE=1 SV=2 - [RAB8B_HUMAN]	291.779	23.19	6	1	5	12	207	23.5691	9.0708
Q9ULC3	Ras-related protein Rab-23 OS=Homo sapiens GN=RAB23 PE=1 SV=1 - [RAB23_HUMAN]	289.902	21.94	1	4	4	6	237	26.6425	6.59521
P20073	Annexin A7 OS=Homo sapiens GN=ANXA7 PE=1 SV=3 - [ANXA7_HUMAN]	289.39	6.35	1	2	2	4	488	52.7058	5.68115
Q92888	Rho guanine nucleotide exchange factor 1 OS=Homo sapiens GN=ARHGEF1 PE=1 SV=2 - [ARHG1_HUMAN]	288.893	5.48	1	4	4	8	912	102.371	5.65576
P30154	Serine/threonine-protein phosphatase 2A 65 kDa regulatory subunit A beta isoform OS=Homo sapiens GN=PPP2R1B PE=1 SV=3 - [2AAB_HUMAN]	288.513	13.14	1	1	4	6	601	66.1715	4.94482
O15554	Intermediate conductance calcium-activated potassium channel protein 4 OS=Homo sapiens GN=KCNN4 PE=1 SV=1 - [KCNN4_HUMAN]	287.737	12.65	1	5	5	8	427	47.6646	9.83252
O14908	PDZ domain-containing protein GIPC1 OS=Homo sapiens GN=GIPC1 PE=1 SV=2 - [GIPC1_HUMAN]	285.622	24.02	2	4	4	6	333	36.0267	6.27783
P07741	Adenine phosphoribosyltransferase OS=Homo sapiens GN=APRT PE=1 SV=2 - [APT_HUMAN]	284.681	39.44	1	6	6	11	180	19.5954	6.02393
Q92542	Nicastrin OS=Homo sapiens GN=NCSTN PE=1 SV=2 - [NICA_HUMAN]	283.62	7.9	1	4	4	8	709	78.3615	5.98584
P12955	Xaa-Pro dipeptidase OS=Homo sapiens GN=PEPD PE=1 SV=3 - [PEPD_HUMAN]	283.031	19.07	1	7	7	9	493	54.5129	5.99854
P31153	S-adenosylmethionine synthase isoform type-2 OS=Homo sapiens GN=MAT2A PE=1 SV=1 - [METK2_HUMAN]	282.512	14.43	1	5	5	8	395	43.6333	6.48096
Q13045	Protein flightless-1 homolog OS=Homo sapiens GN=FLII PE=1 SV=2 - [FLII_HUMAN]	280.931	4.96	1	5	5	6	1269	144.66	6.04932
P28074	Proteasome subunit beta type-5 OS=Homo sapiens GN=PSMB5 PE=1 SV=3 - [PSB5_HUMAN]	280.341	25.48	1	5	5	7	263	28.4622	6.91748
Q9H4M9	EH domain-containing protein 1 OS=Homo sapiens GN=EHD1 PE=1 SV=2 - [EHD1_HUMAN]	278.85	20.6	1	6	8	10	534	60.5887	6.82959
P51153	Ras-related protein Rab-13 OS=Homo sapiens GN=RAB13 PE=1 SV=1 - [RAB13_HUMAN]	276.795	21.67	6	2	4	8	203	22.7597	9.18799
Q07021	Complement component 1 Q subcomponent-binding protein, mitochondrial OS=Homo sapiens GN=C1QBP PE=1 SV=1 - [C1QBP_HUMAN]	276.647	12.06	1	3	3	7	282	31.3426	4.84326
P51114	Fragile X mental retardation syndrome-related protein 1 OS=Homo sapiens GN=FXR1 PE=1 SV=3 - [FXR1_HUMAN]	276.631	13.37	3	7	7	9	621	69.6779	6.15088
O15427	Monocarboxylate transporter 4 OS=Homo sapiens GN=SLC16A3 PE=1 SV=1 - [MOT4_HUMAN]	276.069	8.39	1	3	3	9	465	49.4369	7.95752
Q05682	Caldesmon OS=Homo sapiens GN=CALD1 PE=1 SV=3 - [CALD1_HUMAN]	276.069	11.98	1	6	6	7	793	93.1754	5.65576
Q10471	Polypeptide N-acetylgalactosaminyltransferase 2 OS=Homo sapiens GN=GALNT2 PE=1 SV=1 - [GALT2_HUMAN]	276	16.81	1	7	7	9	571	64.6915	8.35303
P52597	Heterogeneous nuclear ribonucleoprotein F OS=Homo sapiens GN=HNRNPF PE=1 SV=3 - [HNRPF_HUMAN]	275.11	10.36	1	1	3	6	415	45.6429	5.57959
O43242	26S proteasome non-ATPase regulatory subunit 3 OS=Homo sapiens GN=PSMD3 PE=1 SV=2 - [PSMD3_HUMAN]	275.041	18.54	1	7	7	9	534	60.9395	8.44092
P61313	60S ribosomal protein L15 OS=Homo sapiens GN=RPL15 PE=1 SV=2 - [RL15_HUMAN]	272.737	31.86	1	6	6	17	204	24.1311	11.6196
P61254	60S ribosomal protein L26 OS=Homo sapiens GN=RPL26 PE=1 SV=1 - [RL26_HUMAN]	272.428	26.9	2	4	4	9	145	17.2475	10.5503
P69905	Hemoglobin subunit alpha OS=Homo sapiens GN=HBA1 PE=1 SV=2 - [HBA_HUMAN]	272.319	34.51	2	5	5	14	142	15.2479	8.67529
P62917	60S ribosomal protein L8 OS=Homo sapiens GN=RPL8 PE=1 SV=2 - [RL8_HUMAN]	271.35	13.62	1	3	3	7	257	28.0073	11.0337
Q9UHN6	Transmembrane protein 2 OS=Homo sapiens GN=TMEM2 PE=1 SV=1 - [TMEM2_HUMAN]	271.24	5.28	2	5	5	9	1383	154.276	8.14795
Q96FW1	Ubiquitin thioesterase OTUB1 OS=Homo sapiens GN=OTUB1 PE=1 SV=2 - [OTUB1_HUMAN]	271.045	18.45	1	4	4	7	271	31.2644	4.94482
O94973	AP-2 complex subunit alpha-2 OS=Homo sapiens GN=AP2A2 PE=1 SV=2 - [AP2A2_HUMAN]	270.391	11.5	1	4	6	7	939	103.895	6.96143
Q16543	Hsp90 co-chaperone Cdc37 OS=Homo sapiens GN=CDC37 PE=1 SV=1 - [CDC37_HUMAN]	269.288	19.58	1	5	5	8	378	44.44	5.24951
Q00341	Vigilin OS=Homo sapiens GN=HDLBP PE=1 SV=2 - [VIGLN_HUMAN]	268.559	10.33	1	8	8	9	1268	141.368	6.87354
O00629	Importin subunit alpha-4 OS=Homo sapiens GN=KPNA4 PE=1 SV=1 - [IMA4_HUMAN]	267.096	20.92	1	4	6	8	521	57.8506	4.95752
P21926	CD9 antigen OS=Homo sapiens GN=CD9 PE=1 SV=4 - [CD9_HUMAN]	266.534	15.35	1	3	3	7	228	25.399	7.15186
P14314	Glucosidase 2 subunit beta OS=Homo sapiens GN=PRKCSH PE=1 SV=2 - [GLU2B_HUMAN]	266.421	8.9	1	4	4	5	528	59.3878	4.41162
P35625	Metalloproteinase inhibitor 3 OS=Homo sapiens GN=TIMP3 PE=1 SV=2 - [TIMP3_HUMAN]	266.08	29.86	1	5	5	8	211	24.1288	8.71924
Q02790	Peptidyl-prolyl cis-trans isomerase FKBP4 OS=Homo sapiens GN=FKBP4 PE=1 SV=3 - [FKBP4_HUMAN]	265.088	20.04	1	6	6	8	459	51.7721	5.42725
P60866	40S ribosomal protein S20 OS=Homo sapiens GN=RPS20 PE=1 SV=1 - [RS20_HUMAN]	264.35	25.21	1	3	3	8	119	13.3643	9.93506
P84098	60S ribosomal protein L19 OS=Homo sapiens GN=RPL19 PE=1 SV=1 - [RL19_HUMAN]	263.173	17.86	1	4	4	9	196	23.4512	11.4731
P10451	Osteopontin OS=Homo sapiens GN=SPP1 PE=1 SV=1 - [OSTP_HUMAN]	262.695	19.43	1	4	4	7	314	35.4012	4.57666
P54727	UV excision repair protein RAD23 homolog B OS=Homo sapiens GN=RAD23B PE=1 SV=1 - [RD23B_HUMAN]	262.28	14.91	1	3	3	5	409	43.1446	4.84326
Q15008	26S proteasome non-ATPase regulatory subunit 6 OS=Homo sapiens GN=PSMD6 PE=1 SV=1 - [PSMD6_HUMAN]	260.065	12.08	1	4	4	8	389	45.5023	5.61768
P31689	DnaJ homolog subfamily A member 1 OS=Homo sapiens GN=DNAJA1 PE=1 SV=2 - [DNJA1_HUMAN]	259.215	22.42	4	5	5	7	397	44.8395	7.07861
Q9Y4G6	Talin-2 OS=Homo sapiens GN=TLN2 PE=1 SV=4 - [TLN2_HUMAN]	259.032	2.87	1	1	6	9	2542	271.443	5.56689
O15145	Actin-related protein 2/3 complex subunit 3 OS=Homo sapiens GN=ARPC3 PE=1 SV=3 - [ARPC3_HUMAN]	258.282	21.91	1	4	4	8	178	20.5334	8.5874
P18621	60S ribosomal protein L17 OS=Homo sapiens GN=RPL17 PE=1 SV=3 - [RL17_HUMAN]	258.06	37.5	1	6	6	11	184	21.3833	10.1694
P36543	V-type proton ATPase subunit E 1 OS=Homo sapiens GN=ATP6V1E1 PE=1 SV=1 - [VATE1_HUMAN]	258.044	21.24	2	5	5	9	226	26.1288	8.00146
O60256	Phosphoribosyl pyrophosphate synthase-associated protein 2 OS=Homo sapiens GN=PRPSAP2 PE=1 SV=1 - [KPRB_HUMAN]	257.98	8.4	1	2	2	4	369	40.8994	7.44482
P04843	Dolichyl-diphosphooligosaccharide--protein glycosyltransferase subunit 1 OS=Homo sapiens GN=RPN1 PE=1 SV=1 - [RPN1_HUMAN]	257.518	13.51	1	7	7	9	607	68.5268	6.37939
Q9UNF1	Melanoma-associated antigen D2 OS=Homo sapiens GN=MAGED2 PE=1 SV=2 - [MAGD2_HUMAN]	256.447	13.53	3	6	6	9	606	64.9144	9.31982
Q96RW7	Hemicentin-1 OS=Homo sapiens GN=HMCN1 PE=1 SV=2 - [HMCN1_HUMAN]	255.912	1.76	1	7	7	8	5635	613.001	6.49365
P20618	Proteasome subunit beta type-1 OS=Homo sapiens GN=PSMB1 PE=1 SV=2 - [PSB1_HUMAN]	255.83	35.27	1	7	7	10	241	26.4724	8.1333
P61026	Ras-related protein Rab-10 OS=Homo sapiens GN=RAB10 PE=1 SV=1 - [RAB10_HUMAN]	255.77	16	2	2	3	7	200	22.5266	8.38232
Q9ULZ3	Apoptosis-associated speck-like protein containing a CARD OS=Homo sapiens GN=PYCARD PE=1 SV=2 - [ASC_HUMAN]	255.28	8.72	1	2	2	5	195	21.6133	6.34131
P15170	Eukaryotic peptide chain release factor GTP-binding subunit ERF3A OS=Homo sapiens GN=GSPT1 PE=1 SV=1 - [ERF3A_HUMAN]	255.207	15.83	2	5	5	7	499	55.7203	5.61768
P09417	Dihydropteridine reductase OS=Homo sapiens GN=QDPR PE=1 SV=2 - [DHPR_HUMAN]	254.755	19.26	1	3	3	5	244	25.773	7.37158
P62263	40S ribosomal protein S14 OS=Homo sapiens GN=RPS14 PE=1 SV=3 - [RS14_HUMAN]	254.27	29.14	1	3	3	7	151	16.2625	10.0522
P08582	Melanotransferrin OS=Homo sapiens GN=MFI2 PE=1 SV=2 - [TRFM_HUMAN]	253.244	8.27	5	4	5	9	738	80.1633	5.93506
Q9Y266	Nuclear migration protein nudC OS=Homo sapiens GN=NUDC PE=1 SV=1 - [NUDC_HUMAN]	252.978	18.73	1	6	6	10	331	38.2191	5.37646
P07384	Calpain-1 catalytic subunit OS=Homo sapiens GN=CAPN1 PE=1 SV=1 - [CAN1_HUMAN]	252.935	17.51	1	8	8	11	714	81.8382	5.66846
Q13404	Ubiquitin-conjugating enzyme E2 variant 1 OS=Homo sapiens GN=UBE2V1 PE=1 SV=2 - [UB2V1_HUMAN]	252.706	42.86	2	5	5	7	147	16.4843	7.92822
Q14192	Four and a half LIM domains protein 2 OS=Homo sapiens GN=FHL2 PE=1 SV=3 - [FHL2_HUMAN]	252.551	20.79	1	5	5	8	279	32.1706	7.54736
P62805	Histone H4 OS=Homo sapiens GN=HIST1H4A PE=1 SV=2 - [H4_HUMAN]	252.455	31.07	1	3	3	8	103	11.3604	11.356
P55290	Cadherin-13 OS=Homo sapiens GN=CDH13 PE=1 SV=1 - [CAD13_HUMAN]	251.59	10.38	1	5	5	7	713	78.2379	4.98291
P62847	40S ribosomal protein S24 OS=Homo sapiens GN=RPS24 PE=1 SV=1 - [RS24_HUMAN]	250.75	35.34	1	5	5	7	133	15.4134	10.7847
P12931	Proto-oncogene tyrosine-protein kinase Src OS=Homo sapiens GN=SRC PE=1 SV=3 - [SRC_HUMAN]	250.688	15.3	1	4	7	12	536	59.797	7.41553
P49721	Proteasome subunit beta type-2 OS=Homo sapiens GN=PSMB2 PE=1 SV=1 - [PSB2_HUMAN]	249.66	9.45	1	1	1	5	201	22.8217	7.02002
P63220	40S ribosomal protein S21 OS=Homo sapiens GN=RPS21 PE=1 SV=1 - [RS21_HUMAN]	249.546	34.94	1	2	2	4	83	9.10557	8.49951
O00487	26S proteasome non-ATPase regulatory subunit 14 OS=Homo sapiens GN=PSMD14 PE=1 SV=1 - [PSDE_HUMAN]	248.837	32.9	1	5	5	7	310	34.5546	6.52197
P11279	Lysosome-associated membrane glycoprotein 1 OS=Homo sapiens GN=LAMP1 PE=1 SV=3 - [LAMP1_HUMAN]	248.151	8.63	1	3	3	5	417	44.8538	8.74854
Q13596	Sorting nexin-1 OS=Homo sapiens GN=SNX1 PE=1 SV=3 - [SNX1_HUMAN]	247.99	8.24	1	4	4	6	522	59.0331	5.14795
Q08211	ATP-dependent RNA helicase A OS=Homo sapiens GN=DHX9 PE=1 SV=4 - [DHX9_HUMAN]	247.583	5.51	1	5	5	7	1270	140.869	6.84424
Q9NQR4	Omega-amidase NIT2 OS=Homo sapiens GN=NIT2 PE=1 SV=1 - [NIT2_HUMAN]	246.329	18.12	1	4	4	6	276	30.5886	7.21045
P12236	ADP/ATP translocase 3 OS=Homo sapiens GN=SLC25A6 PE=1 SV=4 - [ADT3_HUMAN]	245.971	16.44	3	2	5	11	298	32.8452	9.74463
P46459	Vesicle-fusing ATPase OS=Homo sapiens GN=NSF PE=1 SV=3 - [NSF_HUMAN]	245.373	9.95	1	7	7	8	744	82.5421	6.94678
P62277	40S ribosomal protein S13 OS=Homo sapiens GN=RPS13 PE=1 SV=2 - [RS13_HUMAN]	244.974	23.18	1	4	4	8	151	17.2117	10.5356
Q8IZP0	Abl interactor 1 OS=Homo sapiens GN=ABI1 PE=1 SV=4 - [ABI1_HUMAN]	243.37	6.1	1	2	2	4	508	55.0467	7.06396
Q13418	Integrin-linked protein kinase OS=Homo sapiens GN=ILK PE=1 SV=2 - [ILK_HUMAN]	242.6	12.17	1	5	5	8	452	51.3859	8.07471
P40429	60S ribosomal protein L13a OS=Homo sapiens GN=RPL13A PE=1 SV=2 - [RL13A_HUMAN]	242.291	23.65	2	6	6	9	203	23.5624	10.9312
O00625	Pirin OS=Homo sapiens GN=PIR PE=1 SV=1 - [PIR_HUMAN]	241.563	18.62	1	4	4	6	290	32.0933	6.91748
Q9UJU6	Drebrin-like protein OS=Homo sapiens GN=DBNL PE=1 SV=1 - [DBNL_HUMAN]	241.355	15.58	1	4	4	4	430	48.1776	5.04639
P49915	GMP synthase [glutamine-hydrolyzing] OS=Homo sapiens GN=GMPS PE=1 SV=1 - [GUAA_HUMAN]	241.135	12.27	1	6	6	9	693	76.667	6.87354
O14828	Secretory carrier-associated membrane protein 3 OS=Homo sapiens GN=SCAMP3 PE=1 SV=3 - [SCAM3_HUMAN]	240.4	9.22	1	2	2	3	347	38.2623	7.63525
O00154	Cytosolic acyl coenzyme A thioester hydrolase OS=Homo sapiens GN=ACOT7 PE=1 SV=3 - [BACH_HUMAN]	240.17	24.74	1	6	6	8	380	41.7693	8.54346
O95747	Serine/threonine-protein kinase OSR1 OS=Homo sapiens GN=OXSR1 PE=1 SV=1 - [OXSR1_HUMAN]	238.908	12.9	1	5	5	7	527	57.9861	6.43018
P14923	Junction plakoglobin OS=Homo sapiens GN=JUP PE=1 SV=3 - [PLAK_HUMAN]	238.489	9.8	1	2	6	8	745	81.6927	6.13818
Q96J84	Kin of IRRE-like protein 1 OS=Homo sapiens GN=KIRREL PE=1 SV=2 - [KIRR1_HUMAN]	237.467	10.17	1	5	5	6	757	83.4838	5.73193
P62081	40S ribosomal protein S7 OS=Homo sapiens GN=RPS7 PE=1 SV=1 - [RS7_HUMAN]	236.775	32.47	1	5	5	12	194	22.1133	10.0962
O60568	Procollagen-lysine,2-oxoglutarate 5-dioxygenase 3 OS=Homo sapiens GN=PLOD3 PE=1 SV=1 - [PLOD3_HUMAN]	236.41	15.58	1	9	9	11	738	84.7315	6.04932
P61163	Alpha-centractin OS=Homo sapiens GN=ACTR1A PE=1 SV=1 - [ACTZ_HUMAN]	235.488	24.47	1	3	6	8	376	42.5869	6.63916
Q15691	Microtubule-associated protein RP/EB family member 1 OS=Homo sapiens GN=MAPRE1 PE=1 SV=3 - [MARE1_HUMAN]	233.11	30.22	2	7	7	15	268	29.9802	5.13525
Q16401	26S proteasome non-ATPase regulatory subunit 5 OS=Homo sapiens GN=PSMD5 PE=1 SV=3 - [PSMD5_HUMAN]	231.571	14.48	1	6	6	9	504	56.1604	5.47803
Q07960	Rho GTPase-activating protein 1 OS=Homo sapiens GN=ARHGAP1 PE=1 SV=1 - [RHG01_HUMAN]	231.074	11.85	1	3	3	6	439	50.4042	6.29053
Q96QK1	Vacuolar protein sorting-associated protein 35 OS=Homo sapiens GN=VPS35 PE=1 SV=2 - [VPS35_HUMAN]	230.874	6.66	1	4	4	6	796	91.6489	5.49072
P35268	60S ribosomal protein L22 OS=Homo sapiens GN=RPL22 PE=1 SV=2 - [RL22_HUMAN]	229.977	18.75	1	2	2	4	128	14.7778	9.18799
P78417	Glutathione S-transferase omega-1 OS=Homo sapiens GN=GSTO1 PE=1 SV=2 - [GSTO1_HUMAN]	229.459	17.01	1	4	4	7	241	27.548	6.59521
O43854	EGF-like repeat and discoidin I-like domain-containing protein 3 OS=Homo sapiens GN=EDIL3 PE=1 SV=1 - [EDIL3_HUMAN]	228.796	12.29	1	5	5	7	480	53.73	7.28369
P26373	60S ribosomal protein L13 OS=Homo sapiens GN=RPL13 PE=1 SV=4 - [RL13_HUMAN]	228.526	22.27	1	5	5	8	211	24.2465	11.6489
P01023	Alpha-2-macroglobulin OS=Homo sapiens GN=A2M PE=1 SV=3 - [A2MG_HUMAN]	228.035	7.53	2	8	8	10	1474	163.188	6.45557
P10155	60 kDa SS-A/Ro ribonucleoprotein OS=Homo sapiens GN=TROVE2 PE=1 SV=2 - [RO60_HUMAN]	227.783	9.48	1	4	4	6	538	60.6312	8.03076
Q15233	Non-POU domain-containing octamer-binding protein OS=Homo sapiens GN=NONO PE=1 SV=4 - [NONO_HUMAN]	227.51	11.25	1	3	3	5	471	54.1973	8.95361
Q07020	60S ribosomal protein L18 OS=Homo sapiens GN=RPL18 PE=1 SV=2 - [RL18_HUMAN]	226.91	23.94	1	4	4	7	188	21.6211	11.7222
Q9UEY8	Gamma-adducin OS=Homo sapiens GN=ADD3 PE=1 SV=1 - [ADDG_HUMAN]	226.89	3.54	1	1	1	3	706	79.1052	6.31592
Q15046	Lysine--tRNA ligase OS=Homo sapiens GN=KARS PE=1 SV=3 - [SYK_HUMAN]	226.5	14.91	1	8	8	9	597	68.0046	6.354
P13612	Integrin alpha-4 OS=Homo sapiens GN=ITGA4 PE=1 SV=3 - [ITA4_HUMAN]	226.332	7.95	1	8	8	12	1032	114.827	6.48096
Q99873	Protein arginine N-methyltransferase 1 OS=Homo sapiens OX=9606 GN=PRMT1 PE=1 SV=3 - [ANM1_HUMAN]	226.27	12.94	2	4	4	6	371	42.4339	5.35107
Q8N474	Secreted frizzled-related protein 1 OS=Homo sapiens GN=SFRP1 PE=1 SV=1 - [SFRP1_HUMAN]	226.033	26.75	1	8	8	13	314	35.3621	8.85107
Q04760	Lactoylglutathione lyase OS=Homo sapiens GN=GLO1 PE=1 SV=4 - [LGUL_HUMAN]	225.524	49.46	1	6	6	10	184	20.7642	5.31299
P13987	CD59 glycoprotein OS=Homo sapiens GN=CD59 PE=1 SV=1 - [CD59_HUMAN]	224.782	18.75	1	2	2	7	128	14.1678	6.48096
Q32P51	Heterogeneous nuclear ribonucleoprotein A1-like 2 OS=Homo sapiens GN=HNRNPA1L2 PE=2 SV=2 - [RA1L2_HUMAN]	224.291	15.31	3	3	4	10	320	34.2043	8.99756
Q9Y6G9	Cytoplasmic dynein 1 light intermediate chain 1 OS=Homo sapiens GN=DYNC1LI1 PE=1 SV=3 - [DC1L1_HUMAN]	223.248	20.65	1	8	8	9	523	56.544	6.41748
Q8TF42	Ubiquitin-associated and SH3 domain-containing protein B OS=Homo sapiens GN=UBASH3B PE=1 SV=2 - [UBS3B_HUMAN]	223.16	6.32	1	3	3	4	649	72.6494	6.93213
Q6ZVM7	TOM1-like protein 2 OS=Homo sapiens GN=TOM1L2 PE=1 SV=1 - [TM1L2_HUMAN]	223.14	17.95	1	5	5	6	507	55.5217	4.79248
Q13283	Ras GTPase-activating protein-binding protein 1 OS=Homo sapiens GN=G3BP1 PE=1 SV=1 - [G3BP1_HUMAN]	223.039	20.6	1	5	6	7	466	52.1321	5.51611
Q9HDC9	Adipocyte plasma membrane-associated protein OS=Homo sapiens GN=APMAP PE=1 SV=2 - [APMAP_HUMAN]	222.214	21.88	1	7	7	9	416	46.4509	6.16357
O14579	Coatomer subunit epsilon OS=Homo sapiens GN=COPE PE=1 SV=3 - [COPE_HUMAN]	222.05	40.58	1	7	7	8	308	34.4603	5.12256
Q13409	Cytoplasmic dynein 1 intermediate chain 2 OS=Homo sapiens GN=DYNC1I2 PE=1 SV=3 - [DC1I2_HUMAN]	221.647	3.29	1	1	1	2	638	71.4121	5.19873
O00506	Serine/threonine-protein kinase 25 OS=Homo sapiens GN=STK25 PE=1 SV=1 - [STK25_HUMAN]	221.547	10.8	1	1	3	5	426	48.0818	6.7417
Q92973	Transportin-1 OS=Homo sapiens GN=TNPO1 PE=1 SV=2 - [TNPO1_HUMAN]	221.492	9.8	1	4	7	10	898	102.289	4.98291
Q8NC51	Plasminogen activator inhibitor 1 RNA-binding protein OS=Homo sapiens GN=SERBP1 PE=1 SV=2 - [PAIRB_HUMAN]	220.982	10.54	1	3	3	9	408	44.9385	8.646
Q14644	Ras GTPase-activating protein 3 OS=Homo sapiens GN=RASA3 PE=1 SV=3 - [RASA3_HUMAN]	220.965	9.83	1	7	7	10	834	95.6382	7.15186
P55010	Eukaryotic translation initiation factor 5 OS=Homo sapiens GN=EIF5 PE=1 SV=2 - [IF5_HUMAN]	219.845	12.53	1	4	4	7	431	49.1918	5.57959
P10644	cAMP-dependent protein kinase type I-alpha regulatory subunit OS=Homo sapiens GN=PRKAR1A PE=1 SV=1 - [KAP0_HUMAN]	219.169	18.64	1	4	4	6	381	42.955	5.35107
P62888	60S ribosomal protein L30 OS=Homo sapiens GN=RPL30 PE=1 SV=2 - [RL30_HUMAN]	219.04	40	1	3	3	4	115	12.7757	9.62744
P50443	Sulfate transporter OS=Homo sapiens GN=SLC26A2 PE=1 SV=2 - [S26A2_HUMAN]	218.99	5.14	1	3	3	5	739	81.6089	8.38232
Q9NQ66	1-phosphatidylinositol-4,5-bisphosphate phosphodiesterase beta-1 OS=Homo sapiens GN=PLCB1 PE=1 SV=1 - [PLCB1_HUMAN]	218.67	5.1	1	4	4	5	1216	138.48	6.22705
P49755	Transmembrane emp24 domain-containing protein 10 OS=Homo sapiens GN=TMED10 PE=1 SV=2 - [TMEDA_HUMAN]	218.578	21	1	3	3	4	219	24.96	7.44482
Q92841	Probable ATP-dependent RNA helicase DDX17 OS=Homo sapiens GN=DDX17 PE=1 SV=2 - [DDX17_HUMAN]	217.423	6.58	1	1	4	8	729	80.222	8.26514
Q92743	Serine protease HTRA1 OS=Homo sapiens GN=HTRA1 PE=1 SV=1 - [HTRA1_HUMAN]	216.955	17.29	1	6	6	8	480	51.2546	7.82568
O95336	6-phosphogluconolactonase OS=Homo sapiens GN=PGLS PE=1 SV=2 - [6PGL_HUMAN]	216.791	16.67	1	2	2	4	258	27.5296	6.04932
P21980	Protein-glutamine gamma-glutamyltransferase 2 OS=Homo sapiens GN=TGM2 PE=1 SV=2 - [TGM2_HUMAN]	215.501	5.39	1	3	3	5	687	77.2797	5.22412
P62829	60S ribosomal protein L23 OS=Homo sapiens GN=RPL23 PE=1 SV=1 - [RL23_HUMAN]	215.245	55	1	6	6	8	140	14.8561	10.5063
P60228	Eukaryotic translation initiation factor 3 subunit E OS=Homo sapiens GN=EIF3E PE=1 SV=1 - [EIF3E_HUMAN]	214.848	9.21	1	3	3	5	445	52.1874	6.03662
Q92974	Rho guanine nucleotide exchange factor 2 OS=Homo sapiens GN=ARHGEF2 PE=1 SV=4 - [ARHG2_HUMAN]	213.435	3.85	1	3	3	4	986	111.473	7.26904
O15061	Synemin OS=Homo sapiens GN=SYNM PE=1 SV=2 - [SYNEM_HUMAN]	213.331	3.19	1	4	4	7	1565	172.663	5.16064
Q9Y3I0	tRNA-splicing ligase RtcB homolog OS=Homo sapiens GN=C22orf28 PE=1 SV=1 - [RTCB_HUMAN]	212.916	15.25	1	6	6	8	505	55.1749	7.2251
Q14258	E3 ubiquitin/ISG15 ligase TRIM25 OS=Homo sapiens GN=TRIM25 PE=1 SV=2 - [TRI25_HUMAN]	212.678	10.63	1	5	5	6	630	70.9277	8.08936
P00750	Tissue-type plasminogen activator OS=Homo sapiens GN=PLAT PE=1 SV=1 - [TPA_HUMAN]	212.569	7.47	1	3	3	3	562	62.8759	7.79639
O00232	26S proteasome non-ATPase regulatory subunit 12 OS=Homo sapiens GN=PSMD12 PE=1 SV=3 - [PSD12_HUMAN]	212.417	12.28	1	5	5	6	456	52.8706	7.6499
P62851	40S ribosomal protein S25 OS=Homo sapiens GN=RPS25 PE=1 SV=1 - [RS25_HUMAN]	212.185	22.4	1	3	3	5	125	13.7337	10.1108
O15260	Surfeit locus protein 4 OS=Homo sapiens GN=SURF4 PE=1 SV=3 - [SURF4_HUMAN]	211.283	6.69	1	1	1	3	269	30.3738	7.78174
O15371	Eukaryotic translation initiation factor 3 subunit D OS=Homo sapiens GN=EIF3D PE=1 SV=1 - [EIF3D_HUMAN]	210.746	8.94	1	4	4	5	548	63.9324	6.04932
P68400	Casein kinase II subunit alpha OS=Homo sapiens GN=CSNK2A1 PE=1 SV=1 - [CSK21_HUMAN]	210.667	18.67	2	6	6	9	391	45.1148	7.73779
Q96N67	Dedicator of cytokinesis protein 7 OS=Homo sapiens GN=DOCK7 PE=1 SV=4 - [DOCK7_HUMAN]	210.359	3.36	2	6	6	9	2140	242.407	6.80029
P05455	Lupus La protein OS=Homo sapiens GN=SSB PE=1 SV=2 - [LA_HUMAN]	209.58	8.82	1	3	3	4	408	46.8082	7.12256
Q9Y3L5	Ras-related protein Rap-2c OS=Homo sapiens GN=RAP2C PE=1 SV=1 - [RAP2C_HUMAN]	209.487	37.16	3	2	5	6	183	20.7314	4.94482
P23246	Splicing factor, proline- and glutamine-rich OS=Homo sapiens GN=SFPQ PE=1 SV=2 - [SFPQ_HUMAN]	209.35	7.64	1	3	3	4	707	76.1016	9.43701
P21283	V-type proton ATPase subunit C 1 OS=Homo sapiens GN=ATP6V1C1 PE=1 SV=4 - [VATC1_HUMAN]	208.983	12.04	1	3	3	6	382	43.914	7.45947
P62745	Rho-related GTP-binding protein RhoB OS=Homo sapiens GN=RHOB PE=1 SV=1 - [RHOB_HUMAN]	208.9	25.51	1	1	3	7	196	22.1091	5.23682
P25789	Proteasome subunit alpha type-4 OS=Homo sapiens GN=PSMA4 PE=1 SV=1 - [PSA4_HUMAN]	208.892	16.48	1	4	4	6	261	29.4652	7.72314
O00231	26S proteasome non-ATPase regulatory subunit 11 OS=Homo sapiens GN=PSMD11 PE=1 SV=3 - [PSD11_HUMAN]	208.659	15.64	1	5	5	8	422	47.434	6.48096
Q9BRA2	Thioredoxin domain-containing protein 17 OS=Homo sapiens GN=TXNDC17 PE=1 SV=1 - [TXD17_HUMAN]	208.107	53.66	1	5	5	8	123	13.9318	5.51611
Q9Y6M5	Zinc transporter 1 OS=Homo sapiens GN=SLC30A1 PE=1 SV=3 - [ZNT1_HUMAN]	208.02	12.62	1	4	4	5	507	55.2641	6.48096
Q04446	1,4-alpha-glucan-branching enzyme OS=Homo sapiens GN=GBE1 PE=1 SV=3 - [GLGB_HUMAN]	207.981	9.4	1	4	4	6	702	80.4226	6.31592
Q9Y285	Phenylalanine--tRNA ligase alpha subunit OS=Homo sapiens GN=FARSA PE=1 SV=3 - [SYFA_HUMAN]	207.68	7.87	1	3	3	5	508	57.5275	7.79639
O95819	Mitogen-activated protein kinase kinase kinase kinase 4 OS=Homo sapiens GN=MAP4K4 PE=1 SV=2 - [M4K4_HUMAN]	207.389	10.17	2	5	8	8	1239	142.013	7.45947
Q96EY5	Multivesicular body subunit 12A OS=Homo sapiens GN=MVB12A PE=1 SV=1 - [MB12A_HUMAN]	207.258	27.47	1	4	4	5	273	28.7647	8.90967
P25788	Proteasome subunit alpha type-3 OS=Homo sapiens GN=PSMA3 PE=1 SV=2 - [PSA3_HUMAN]	207.017	15.69	1	3	3	4	255	28.4151	5.32568
Q04637	Eukaryotic translation initiation factor 4 gamma 1 OS=Homo sapiens GN=EIF4G1 PE=1 SV=4 - [IF4G1_HUMAN]	206.8	6.38	1	9	9	13	1599	175.382	5.32568
P48147	Prolyl endopeptidase OS=Homo sapiens GN=PREP PE=1 SV=2 - [PPCE_HUMAN]	206.332	10.56	1	5	5	6	710	80.648	5.85889
O60814	Histone H2B type 1-K OS=Homo sapiens GN=HIST1H2BK PE=1 SV=3 - [H2B1K_HUMAN]	206.085	26.19	15	3	3	4	126	13.8816	10.3159
P62854	40S ribosomal protein S26 OS=Homo sapiens GN=RPS26 PE=1 SV=3 - [RS26_HUMAN]	205.541	33.91	2	3	3	8	115	13.0071	11.0044
P62913	60S ribosomal protein L11 OS=Homo sapiens GN=RPL11 PE=1 SV=2 - [RL11_HUMAN]	205.53	12.92	1	2	2	5	178	20.2396	9.59814
P36959	GMP reductase 1 OS=Homo sapiens GN=GMPR PE=1 SV=1 - [GMPR1_HUMAN]	205.477	4.35	1	1	1	3	345	37.3948	7.06396
Q07866	Kinesin light chain 1 OS=Homo sapiens GN=KLC1 PE=1 SV=2 - [KLC1_HUMAN]	205.41	8.2	3	4	4	5	573	65.2689	6.20166
Q8WTV0	Scavenger receptor class B member 1 OS=Homo sapiens GN=SCARB1 PE=1 SV=1 - [SCRB1_HUMAN]	203.7	8.15	1	4	4	6	552	60.8377	8.23584
Q9HB71	Calcyclin-binding protein OS=Homo sapiens GN=CACYBP PE=1 SV=2 - [CYBP_HUMAN]	203.346	35.53	1	5	5	7	228	26.1936	8.25049
P19174	1-phosphatidylinositol-4,5-bisphosphate phosphodiesterase gamma-1 OS=Homo sapiens GN=PLCG1 PE=1 SV=1 - [PLCG1_HUMAN]	202.94	4.34	1	5	5	8	1290	148.438	6.04932
P67870	Casein kinase II subunit beta OS=Homo sapiens GN=CSNK2B PE=1 SV=1 - [CSK2B_HUMAN]	202.453	23.26	1	4	4	6	215	24.926	5.5542
P31949	Protein S100-A11 OS=Homo sapiens GN=S100A11 PE=1 SV=2 - [S10AB_HUMAN]	202.26	23.81	1	2	2	5	105	11.7328	7.12256
P11172	Uridine 5'-monophosphate synthase OS=Homo sapiens GN=UMPS PE=1 SV=1 - [UMPS_HUMAN]	201.842	5.63	1	2	2	3	480	52.1886	7.23975
Q13464	Rho-associated protein kinase 1 OS=Homo sapiens GN=ROCK1 PE=1 SV=1 - [ROCK1_HUMAN]	201.176	4.28	1	1	5	6	1354	158.076	5.89697
Q14103	Heterogeneous nuclear ribonucleoprotein D0 OS=Homo sapiens GN=HNRNPD PE=1 SV=1 - [HNRPD_HUMAN]	200.637	11.55	1	2	3	6	355	38.4103	7.81104
P21291	Cysteine and glycine-rich protein 1 OS=Homo sapiens GN=CSRP1 PE=1 SV=3 - [CSRP1_HUMAN]	200.34	15.54	1	2	2	3	193	20.5538	8.57275
P67775	Serine/threonine-protein phosphatase 2A catalytic subunit alpha isoform OS=Homo sapiens GN=PPP2CA PE=1 SV=1 - [PP2AA_HUMAN]	198.93	17.15	2	4	4	5	309	35.5714	5.5415
O00303	Eukaryotic translation initiation factor 3 subunit F OS=Homo sapiens GN=EIF3F PE=1 SV=1 - [EIF3F_HUMAN]	197.97	16.53	1	4	4	5	357	37.5402	5.45264
O60664	Perilipin-3 OS=Homo sapiens GN=PLIN3 PE=1 SV=3 - [PLIN3_HUMAN]	197.45	16.59	1	4	4	5	434	47.0459	5.43994
P01034	Cystatin-C OS=Homo sapiens GN=CST3 PE=1 SV=1 - [CYTC_HUMAN]	197.207	30.82	1	4	4	6	146	15.7891	8.74854
Q9Y5X2	Sorting nexin-8 OS=Homo sapiens GN=SNX8 PE=1 SV=1 - [SNX8_HUMAN]	196.93	6.02	1	2	2	3	465	52.5361	7.38623
Q15185	Prostaglandin E synthase 3 OS=Homo sapiens GN=PTGES3 PE=1 SV=1 - [TEBP_HUMAN]	195.907	20	1	3	3	6	160	18.6854	4.53857
P07203	Glutathione peroxidase 1 OS=Homo sapiens GN=GPX1 PE=1 SV=4 - [GPX1_HUMAN]	195.779	52.22	1	8	8	11	203	22.0751	6.55127
P52272	Heterogeneous nuclear ribonucleoprotein M OS=Homo sapiens GN=HNRNPM PE=1 SV=3 - [HNRPM_HUMAN]	195.76	6.03	1	3	3	5	730	77.4643	8.70459
P14866	Heterogeneous nuclear ribonucleoprotein L OS=Homo sapiens GN=HNRNPL PE=1 SV=2 - [HNRPL_HUMAN]	195.07	11.21	1	5	5	5	589	64.0924	8.22119
Q06323	Proteasome activator complex subunit 1 OS=Homo sapiens GN=PSME1 PE=1 SV=1 - [PSME1_HUMAN]	194.95	19.28	1	5	5	7	249	28.705	6.02393
O00505	Importin subunit alpha-3 OS=Homo sapiens GN=KPNA3 PE=1 SV=2 - [IMA3_HUMAN]	194.584	13.44	1	2	4	4	521	57.7748	4.94482
O95433	Activator of 90 kDa heat shock protein ATPase homolog 1 OS=Homo sapiens GN=AHSA1 PE=1 SV=1 - [AHSA1_HUMAN]	194.293	17.46	1	4	4	7	338	38.2503	5.52881
Q68CZ2	Tensin-3 OS=Homo sapiens GN=TNS3 PE=1 SV=2 - [TENS3_HUMAN]	193.968	7.75	1	6	6	6	1445	155.169	6.81494
P83731	60S ribosomal protein L24 OS=Homo sapiens GN=RPL24 PE=1 SV=1 - [RL24_HUMAN]	193.49	19.11	1	3	3	5	157	17.7679	11.2534
Q9C004	Protein sprouty homolog 4 OS=Homo sapiens GN=SPRY4 PE=1 SV=2 - [SPY4_HUMAN]	193.4	24.41	1	6	6	10	299	32.5197	7.88428
Q01105	Protein SET OS=Homo sapiens GN=SET PE=1 SV=3 - [SET_HUMAN]	192.979	18.97	2	4	4	6	290	33.4687	4.32275
Q9UBS4	DnaJ homolog subfamily B member 11 OS=Homo sapiens GN=DNAJB11 PE=1 SV=1 - [DJB11_HUMAN]	192.632	16.76	1	5	5	7	358	40.4886	6.17627
P61758	Prefoldin subunit 3 OS=Homo sapiens GN=VBP1 PE=1 SV=3 - [PFD3_HUMAN]	192.387	32.99	1	5	5	5	197	22.6434	7.10791
Q12979	Active breakpoint cluster region-related protein OS=Homo sapiens GN=ABR PE=2 SV=2 - [ABR_HUMAN]	191.949	10.36	2	5	5	6	859	97.5362	6.55127
P84095	Rho-related GTP-binding protein RhoG OS=Homo sapiens GN=RHOG PE=1 SV=1 - [RHOG_HUMAN]	191.824	29.32	1	5	5	7	191	21.2949	8.11865
P61019	Ras-related protein Rab-2A OS=Homo sapiens GN=RAB2A PE=1 SV=1 - [RAB2A_HUMAN]	190.943	18.87	2	3	3	3	212	23.5308	6.53662
P01920	HLA class II histocompatibility antigen, DQ beta 1 chain OS=Homo sapiens GN=HLA-DQB1 PE=1 SV=2 - [DQB1_HUMAN]	190.733	11.88	1	4	4	6	261	29.9722	7.25439
Q12846	Syntaxin-4 OS=Homo sapiens GN=STX4 PE=1 SV=2 - [STX4_HUMAN]	189.941	12.79	1	3	3	7	297	34.1589	6.27783
P13473	Lysosome-associated membrane glycoprotein 2 OS=Homo sapiens GN=LAMP2 PE=1 SV=2 - [LAMP2_HUMAN]	189.853	7.07	1	3	3	6	410	44.9323	5.63037
Q9GZS3	WD repeat-containing protein 61 OS=Homo sapiens GN=WDR61 PE=1 SV=1 - [WDR61_HUMAN]	189.45	9.51	1	2	2	3	305	33.5598	5.46533
P29317	Ephrin type-A receptor 2 OS=Homo sapiens GN=EPHA2 PE=1 SV=2 - [EPHA2_HUMAN]	189.27	3.28	1	2	2	3	976	108.197	6.22705
P49593	Protein phosphatase 1F OS=Homo sapiens GN=PPM1F PE=1 SV=3 - [PPM1F_HUMAN]	187.78	5.73	1	1	1	2	454	49.8001	5.09717
Q9Y5X1	Sorting nexin-9 OS=Homo sapiens GN=SNX9 PE=1 SV=1 - [SNX9_HUMAN]	187.69	7.23	1	3	3	4	595	66.5496	5.57959
P42356	Phosphatidylinositol 4-kinase alpha OS=Homo sapiens GN=PI4KA PE=1 SV=4 - [PI4KA_HUMAN]	187.327	3	1	4	4	6	2102	236.678	7.06396
O75340	Programmed cell death protein 6 OS=Homo sapiens GN=PDCD6 PE=1 SV=1 - [PDCD6_HUMAN]	186.945	15.71	1	3	3	5	191	21.8548	5.40186
Q15286	Ras-related protein Rab-35 OS=Homo sapiens GN=RAB35 PE=1 SV=1 - [RAB35_HUMAN]	186.474	25.37	2	3	4	6	201	23.0108	8.29443
Q8TAA9	Vang-like protein 1 OS=Homo sapiens GN=VANGL1 PE=1 SV=1 - [VANG1_HUMAN]	185.73	8.78	1	3	3	4	524	59.9372	8.80713
Q96BJ3	Axin interactor, dorsalization-associated protein OS=Homo sapiens GN=AIDA PE=1 SV=1 - [AIDA_HUMAN]	185.673	19.93	1	5	5	6	306	35.0013	6.55127
P38117	Electron transfer flavoprotein subunit beta OS=Homo sapiens GN=ETFB PE=1 SV=3 - [ETFB_HUMAN]	185.224	9.41	1	2	2	4	255	27.8262	8.104
P62195	26S protease regulatory subunit 8 OS=Homo sapiens GN=PSMC5 PE=1 SV=1 - [PRS8_HUMAN]	185.008	20.2	1	6	7	8	406	45.5971	7.54736
Q9BR76	Coronin-1B OS=Homo sapiens GN=CORO1B PE=1 SV=1 - [COR1B_HUMAN]	183.855	21.06	1	6	6	7	489	54.2003	5.88428
P58546	Myotrophin OS=Homo sapiens GN=MTPN PE=1 SV=2 - [MTPN_HUMAN]	183.46	20.34	1	2	2	4	118	12.8866	5.51611
P49354	Protein farnesyltransferase/geranylgeranyltransferase type-1 subunit alpha OS=Homo sapiens GN=FNTA PE=1 SV=1 - [FNTA_HUMAN]	182.56	4.75	1	1	1	4	379	44.3811	5.08447
Q13177	Serine/threonine-protein kinase PAK 2 OS=Homo sapiens GN=PAK2 PE=1 SV=3 - [PAK2_HUMAN]	182.473	11.83	2	5	5	6	524	58.0059	5.96045
P00387	NADH-cytochrome b5 reductase 3 OS=Homo sapiens GN=CYB5R3 PE=1 SV=3 - [NB5R3_HUMAN]	182.226	16.94	1	4	4	7	301	34.2127	7.59131
Q96RT1	Protein LAP2 OS=Homo sapiens GN=ERBB2IP PE=1 SV=2 - [LAP2_HUMAN]	182.156	3.61	1	3	3	5	1412	158.2	5.50342
Q9UHB9	Signal recognition particle 68 kDa protein OS=Homo sapiens GN=SRP68 PE=1 SV=2 - [SRP68_HUMAN]	180.74	6.38	1	3	3	5	627	70.6856	8.55811
P59998	Actin-related protein 2/3 complex subunit 4 OS=Homo sapiens GN=ARPC4 PE=1 SV=3 - [ARPC4_HUMAN]	180.654	23.21	1	4	4	10	168	19.6543	8.42627
Q27J81	Inverted formin-2 OS=Homo sapiens GN=INF2 PE=1 SV=2 - [INF2_HUMAN]	179.657	4.24	1	3	3	4	1249	135.54	5.37646
P28838	Cytosol aminopeptidase OS=Homo sapiens GN=LAP3 PE=1 SV=3 - [AMPL_HUMAN]	179.62	10.4	1	4	4	6	519	56.1308	7.92822
P43307	Translocon-associated protein subunit alpha OS=Homo sapiens GN=SSR1 PE=1 SV=3 - [SSRA_HUMAN]	179.53	9.09	1	2	2	4	286	32.2153	4.48779
Q9BWD1	Acetyl-CoA acetyltransferase, cytosolic OS=Homo sapiens GN=ACAT2 PE=1 SV=2 - [THIC_HUMAN]	179.018	20.4	1	4	4	4	397	41.3244	6.91748
Q9UNH7	Sorting nexin-6 OS=Homo sapiens GN=SNX6 PE=1 SV=1 - [SNX6_HUMAN]	177.663	9.85	2	4	4	5	406	46.6198	6.16357
P14384	Carboxypeptidase M OS=Homo sapiens GN=CPM PE=1 SV=2 - [CBPM_HUMAN]	177.149	13.54	1	5	5	7	443	50.4815	7.35693
P13861	cAMP-dependent protein kinase type II-alpha regulatory subunit OS=Homo sapiens GN=PRKAR2A PE=1 SV=2 - [KAP2_HUMAN]	176.857	15.1	1	3	4	5	404	45.49	5.07178
Q9NR45	Sialic acid synthase OS=Homo sapiens GN=NANS PE=1 SV=2 - [SIAS_HUMAN]	176.727	13.93	1	4	4	6	359	40.2815	6.7417
O15498	Synaptobrevin homolog YKT6 OS=Homo sapiens GN=YKT6 PE=1 SV=1 - [YKT6_HUMAN]	176.372	30.3	1	4	4	5	198	22.4034	6.91748
Q13162	Peroxiredoxin-4 OS=Homo sapiens GN=PRDX4 PE=1 SV=1 - [PRDX4_HUMAN]	175.793	7.75	1	1	2	6	271	30.5208	6.29053
Q9UL46	Proteasome activator complex subunit 2 OS=Homo sapiens GN=PSME2 PE=1 SV=4 - [PSME2_HUMAN]	175.755	13.39	1	2	2	2	239	27.3843	5.73193
P98160	Basement membrane-specific heparan sulfate proteoglycan core protein OS=Homo sapiens GN=HSPG2 PE=1 SV=4 - [PGBM_HUMAN]	175.54	1.71	1	6	6	8	4391	468.532	6.50732
P62333	26S protease regulatory subunit 10B OS=Homo sapiens GN=PSMC6 PE=1 SV=1 - [PRS10_HUMAN]	175.09	10.54	1	3	3	5	389	44.1451	7.48877
P62070	Ras-related protein R-Ras2 OS=Homo sapiens GN=RRAS2 PE=1 SV=1 - [RRAS2_HUMAN]	174.956	22.55	1	3	4	7	204	23.3847	6.01123
O60684	Importin subunit alpha-7 OS=Homo sapiens GN=KPNA6 PE=1 SV=1 - [IMA7_HUMAN]	174.693	11.94	2	3	4	5	536	59.9915	4.98291
P05387	60S acidic ribosomal protein P2 OS=Homo sapiens GN=RPLP2 PE=1 SV=1 - [RLA2_HUMAN]	173.34	69.57	1	4	4	4	115	11.6578	4.53857
P00441	Superoxide dismutase [Cu-Zn] OS=Homo sapiens GN=SOD1 PE=1 SV=2 - [SODC_HUMAN]	172.29	16.88	1	2	2	4	154	15.9259	6.12549
P62942	Peptidyl-prolyl cis-trans isomerase FKBP1A OS=Homo sapiens GN=FKBP1A PE=1 SV=2 - [FKB1A_HUMAN]	172.087	25	1	2	2	3	108	11.9431	8.1626
Q8N392	Rho GTPase-activating protein 18 OS=Homo sapiens GN=ARHGAP18 PE=1 SV=3 - [RHG18_HUMAN]	171.72	8.3	1	4	4	4	663	74.9299	6.44287
Q12929	Epidermal growth factor receptor kinase substrate 8 OS=Homo sapiens GN=EPS8 PE=1 SV=1 - [EPS8_HUMAN]	171.49	6.81	1	3	3	4	822	91.8244	7.50342
P62266	40S ribosomal protein S23 OS=Homo sapiens GN=RPS23 PE=1 SV=3 - [RS23_HUMAN]	171.458	34.97	1	3	3	4	143	15.7977	10.4917
Q9Y5X3	Sorting nexin-5 OS=Homo sapiens GN=SNX5 PE=1 SV=1 - [SNX5_HUMAN]	171.161	10.4	1	3	4	5	404	46.7872	6.75635
Q9Y2J2	Band 4.1-like protein 3 OS=Homo sapiens GN=EPB41L3 PE=1 SV=2 - [E41L3_HUMAN]	170.962	6.07	2	2	5	7	1087	120.603	5.18604
P42766	60S ribosomal protein L35 OS=Homo sapiens GN=RPL35 PE=1 SV=2 - [RL35_HUMAN]	170.655	16.26	1	3	3	8	123	14.5426	11.0483
P26196	Probable ATP-dependent RNA helicase DDX6 OS=Homo sapiens GN=DDX6 PE=1 SV=2 - [DDX6_HUMAN]	170.435	10.14	4	2	3	4	483	54.3823	8.66064
P35232	Prohibitin OS=Homo sapiens GN=PHB PE=1 SV=1 - [PHB_HUMAN]	170.263	21.32	1	4	4	5	272	29.7859	5.75732
Q15436	Protein transport protein Sec23A OS=Homo sapiens GN=SEC23A PE=1 SV=2 - [SC23A_HUMAN]	170.24	3.53	1	1	2	4	765	86.1053	7.07861
O60488	Long-chain-fatty-acid--CoA ligase 4 OS=Homo sapiens GN=ACSL4 PE=1 SV=2 - [ACSL4_HUMAN]	170.081	12.1	1	4	6	7	711	79.1367	8.38232
P46776	60S ribosomal protein L27a OS=Homo sapiens GN=RPL27A PE=1 SV=2 - [RL27A_HUMAN]	170.003	22.3	1	3	3	6	148	16.551	11.0044
Q15121	Astrocytic phosphoprotein PEA-15 OS=Homo sapiens GN=PEA15 PE=1 SV=2 - [PEA15_HUMAN]	169.99	28.46	1	2	2	4	130	15.0308	5.021
P63172	Dynein light chain Tctex-type 1 OS=Homo sapiens GN=DYNLT1 PE=1 SV=1 - [DYLT1_HUMAN]	169.457	19.47	1	1	1	3	113	12.444	5.08447
O75351	Vacuolar protein sorting-associated protein 4B OS=Homo sapiens GN=VPS4B PE=1 SV=2 - [VPS4B_HUMAN]	169.17	12.39	3	4	4	6	444	49.2715	7.2251
P53794	Sodium/myo-inositol cotransporter OS=Homo sapiens GN=SLC5A3 PE=3 SV=2 - [SC5A3_HUMAN]	168.864	14.21	1	6	6	7	718	79.6413	7.26904
P48739	Phosphatidylinositol transfer protein beta isoform OS=Homo sapiens GN=PITPNB PE=1 SV=2 - [PIPNB_HUMAN]	168.591	23.62	1	7	7	10	271	31.5199	6.87354
Q15836	Vesicle-associated membrane protein 3 OS=Homo sapiens GN=VAMP3 PE=1 SV=3 - [VAMP3_HUMAN]	168.27	16	1	1	1	2	100	11.302	8.79248
P63151	Serine/threonine-protein phosphatase 2A 55 kDa regulatory subunit B alpha isoform OS=Homo sapiens GN=PPP2R2A PE=1 SV=1 - [2ABA_HUMAN]	167.841	18.57	4	5	5	7	447	51.6595	6.20166
P78324	Tyrosine-protein phosphatase non-receptor type substrate 1 OS=Homo sapiens GN=SIRPA PE=1 SV=2 - [SHPS1_HUMAN]	167.516	11.9	2	4	4	5	504	54.9328	6.97607
O95573	Long-chain-fatty-acid--CoA ligase 3 OS=Homo sapiens GN=ACSL3 PE=1 SV=3 - [ACSL3_HUMAN]	167.23	6.94	1	2	4	5	720	80.3683	8.38232
Q9NVD7	Alpha-parvin OS=Homo sapiens GN=PARVA PE=1 SV=1 - [PARVA_HUMAN]	167.167	7.53	1	2	2	3	372	42.2174	5.94775
Q12906	Interleukin enhancer-binding factor 3 OS=Homo sapiens GN=ILF3 PE=1 SV=3 - [ILF3_HUMAN]	166.924	4.81	1	3	3	3	894	95.2791	8.76318
P53618	Coatomer subunit beta OS=Homo sapiens GN=COPB1 PE=1 SV=3 - [COPB_HUMAN]	165.547	11.75	1	7	7	7	953	107.074	6.04932
Q969G5	Protein kinase C delta-binding protein OS=Homo sapiens GN=PRKCDBP PE=1 SV=3 - [PRDBP_HUMAN]	165.39	14.94	1	3	3	5	261	27.6845	6.43018
P03956	Interstitial collagenase OS=Homo sapiens GN=MMP1 PE=1 SV=3 - [MMP1_HUMAN]	164.985	11.73	1	5	5	8	469	53.9728	6.96143
Q92783	Signal transducing adapter molecule 1 OS=Homo sapiens GN=STAM PE=1 SV=3 - [STAM1_HUMAN]	164.702	13.15	1	4	4	4	540	59.142	4.81787
Q07812	Apoptosis regulator BAX OS=Homo sapiens GN=BAX PE=1 SV=1 - [BAX_HUMAN]	164.032	29.69	1	4	4	4	192	21.1708	5.22412
Q16531	DNA damage-binding protein 1 OS=Homo sapiens GN=DDB1 PE=1 SV=1 - [DDB1_HUMAN]	163.99	3.95	1	3	3	6	1140	126.887	5.26221
Q14669	Probable E3 ubiquitin-protein ligase TRIP12 OS=Homo sapiens GN=TRIP12 PE=1 SV=1 - [TRIPC_HUMAN]	163.27	1.66	2	2	3	5	1992	220.296	8.48486
O94919	Endonuclease domain-containing 1 protein OS=Homo sapiens GN=ENDOD1 PE=1 SV=2 - [ENDD1_HUMAN]	163.01	11.6	1	4	4	5	500	54.9813	5.70654
P05386	60S acidic ribosomal protein P1 OS=Homo sapiens GN=RPLP1 PE=1 SV=1 - [RLA1_HUMAN]	162.653	74.56	1	3	3	3	114	11.5067	4.32275
Q9NRX4	14 kDa phosphohistidine phosphatase OS=Homo sapiens GN=PHPT1 PE=1 SV=1 - [PHP14_HUMAN]	161.58	16	1	1	1	4	125	13.8237	6.07471
Q9Y376	Calcium-binding protein 39 OS=Homo sapiens GN=CAB39 PE=1 SV=1 - [CAB39_HUMAN]	161.56	15.25	2	4	5	8	341	39.8437	6.88818
P41252	Isoleucine--tRNA ligase, cytoplasmic OS=Homo sapiens GN=IARS PE=1 SV=2 - [SYIC_HUMAN]	160.5	7.45	1	6	6	6	1262	144.406	6.15088
Q14314	Fibroleukin OS=Homo sapiens GN=FGL2 PE=1 SV=1 - [FGL2_HUMAN]	159.91	5.69	1	2	2	4	439	50.1968	7.38623
Q9UBC2	Epidermal growth factor receptor substrate 15-like 1 OS=Homo sapiens GN=EPS15L1 PE=1 SV=1 - [EP15R_HUMAN]	159.46	4.86	1	2	2	4	864	94.197	5.10986
O00160	Unconventional myosin-If OS=Homo sapiens GN=MYO1F PE=1 SV=3 - [MYO1F_HUMAN]	158.273	2.28	2	2	2	3	1098	124.766	9.11475
Q06124	Tyrosine-protein phosphatase non-receptor type 11 OS=Homo sapiens GN=PTPN11 PE=1 SV=2 - [PTN11_HUMAN]	158.223	5.03	1	3	3	5	597	68.3933	7.29834
P09110	3-ketoacyl-CoA thiolase, peroxisomal OS=Homo sapiens GN=ACAA1 PE=1 SV=2 - [THIK_HUMAN]	157.475	7.08	1	2	2	4	424	44.2639	8.44092
Q96JB5	CDK5 regulatory subunit-associated protein 3 OS=Homo sapiens GN=CDK5RAP3 PE=1 SV=2 - [CK5P3_HUMAN]	156.971	3.95	4	1	2	3	506	56.885	4.75439
Q96C19	EF-hand domain-containing protein D2 OS=Homo sapiens GN=EFHD2 PE=1 SV=1 - [EFHD2_HUMAN]	156.97	12.5	2	3	3	6	240	26.6805	5.19873
O14787	Transportin-2 OS=Homo sapiens GN=TNPO2 PE=1 SV=3 - [TNPO2_HUMAN]	156.881	5.35	1	1	4	6	897	101.322	5.0083
P46821	Microtubule-associated protein 1B OS=Homo sapiens GN=MAP1B PE=1 SV=2 - [MAP1B_HUMAN]	156.273	2.31	2	5	5	8	2468	270.468	4.80518
Q9H0E2	Toll-interacting protein OS=Homo sapiens GN=TOLLIP PE=1 SV=1 - [TOLIP_HUMAN]	155.7	9.85	1	2	2	4	274	30.2622	5.97314
P30046	D-dopachrome decarboxylase OS=Homo sapiens GN=DDT PE=1 SV=3 - [DOPD_HUMAN]	155.69	30.51	2	3	3	4	118	12.7037	7.29834
Q9H4A4	Aminopeptidase B OS=Homo sapiens GN=RNPEP PE=1 SV=2 - [AMPB_HUMAN]	155.16	10.31	1	4	4	5	650	72.5495	5.74463
Q9Y262	Eukaryotic translation initiation factor 3 subunit L OS=Homo sapiens GN=EIF3L PE=1 SV=1 - [EIF3L_HUMAN]	154.86	6.91	1	3	3	3	564	66.6844	6.34131
Q9Y4F1	FERM, RhoGEF and pleckstrin domain-containing protein 1 OS=Homo sapiens GN=FARP1 PE=1 SV=1 - [FARP1_HUMAN]	154.826	2.68	1	2	2	3	1045	118.559	8.14795
O60462	Neuropilin-2 OS=Homo sapiens OX=9606 GN=NRP2 PE=1 SV=3 - [NRP2_HUMAN]	154.537	5.05	1	4	4	5	931	104.764	5.17334
P05771	Protein kinase C beta type OS=Homo sapiens GN=PRKCB PE=1 SV=4 - [KPCB_HUMAN]	154.21	1.79	2	1	1	2	671	76.8191	7.00537
Q6IBS0	Twinfilin-2 OS=Homo sapiens GN=TWF2 PE=1 SV=2 - [TWF2_HUMAN]	153.82	16.62	1	4	4	7	349	39.5233	6.84424
P06454	Prothymosin alpha OS=Homo sapiens GN=PTMA PE=1 SV=2 - [PTMA_HUMAN]	153.778	12.61	1	1	1	2	111	12.196	3.77686
Q7Z3E5	LisH domain-containing protein ARMC9 OS=Homo sapiens OX=9606 GN=ARMC9 PE=1 SV=3 - [ARMC9_HUMAN]	153.723	5.01	1	2	2	3	818	91.761	6.20166
P25786	Proteasome subunit alpha type-1 OS=Homo sapiens GN=PSMA1 PE=1 SV=1 - [PSA1_HUMAN]	152.827	22.43	1	4	4	6	263	29.5369	6.60986
P04440	HLA class II histocompatibility antigen, DP beta 1 chain OS=Homo sapiens GN=HLA-DPB1 PE=1 SV=1 - [DPB1_HUMAN]	152.45	9.3	1	2	2	5	258	29.1408	8.57275
O94832	Unconventional myosin-Id OS=Homo sapiens GN=MYO1D PE=1 SV=2 - [MYO1D_HUMAN]	152.44	3.48	1	3	3	3	1006	116.129	9.39307
Q03154	Aminoacylase-1 OS=Homo sapiens GN=ACY1 PE=1 SV=1 - [ACY1_HUMAN]	152.43	12.01	1	3	3	5	408	45.856	6.17627
Q9P258	Protein RCC2 OS=Homo sapiens GN=RCC2 PE=1 SV=2 - [RCC2_HUMAN]	152	6.7	1	3	3	5	522	56.0492	8.77783
O94887	FERM, RhoGEF and pleckstrin domain-containing protein 2 OS=Homo sapiens GN=FARP2 PE=1 SV=3 - [FARP2_HUMAN]	151.543	3.98	1	2	2	3	1054	119.813	8.79248
Q9UL25	Ras-related protein Rab-21 OS=Homo sapiens GN=RAB21 PE=1 SV=3 - [RAB21_HUMAN]	151.32	25.78	1	4	4	6	225	24.3323	7.94287
Q9NUU7	ATP-dependent RNA helicase DDX19A OS=Homo sapiens GN=DDX19A PE=1 SV=1 - [DD19A_HUMAN]	150.36	7.74	2	2	2	2	478	53.9408	6.58057
O95232	Luc7-like protein 3 OS=Homo sapiens GN=LUC7L3 PE=1 SV=2 - [LC7L3_HUMAN]	150.08	3.24	1	1	1	2	432	51.4351	9.78857
Q9NSD9	Phenylalanine--tRNA ligase beta subunit OS=Homo sapiens GN=FARSB PE=1 SV=3 - [SYFB_HUMAN]	149.909	11.54	1	5	6	7	589	66.0735	6.84424
Q96P70	Importin-9 OS=Homo sapiens GN=IPO9 PE=1 SV=3 - [IPO9_HUMAN]	149.65	4.42	1	2	2	3	1041	115.889	4.80518
Q02543	60S ribosomal protein L18a OS=Homo sapiens GN=RPL18A PE=1 SV=2 - [RL18A_HUMAN]	149.57	18.18	1	3	3	7	176	20.7489	10.7114
Q9BXS5	AP-1 complex subunit mu-1 OS=Homo sapiens GN=AP1M1 PE=1 SV=3 - [AP1M1_HUMAN]	149.437	17.26	1	5	5	6	423	48.5561	7.29834
P62910	60S ribosomal protein L32 OS=Homo sapiens GN=RPL32 PE=1 SV=2 - [RL32_HUMAN]	148.978	22.96	1	3	3	10	135	15.8498	11.3267
P37837	Transaldolase OS=Homo sapiens GN=TALDO1 PE=1 SV=2 - [TALDO_HUMAN]	148.903	10.98	1	4	4	9	337	37.5165	6.81494
O60784	Target of Myb protein 1 OS=Homo sapiens GN=TOM1 PE=1 SV=2 - [TOM1_HUMAN]	148.74	3.25	1	1	1	2	492	53.7849	4.70361
P30043	Flavin reductase (NADPH) OS=Homo sapiens GN=BLVRB PE=1 SV=3 - [BLVRB_HUMAN]	148.076	18.93	1	3	3	3	206	22.1054	7.6499
O95861	3'(2'),5'-bisphosphate nucleotidase 1 OS=Homo sapiens GN=BPNT1 PE=1 SV=1 - [BPNT1_HUMAN]	147.91	8.77	1	2	2	2	308	33.3712	5.69385
Q96KK5	Histone H2A type 1-H OS=Homo sapiens GN=HIST1H2AH PE=1 SV=3 - [H2A1H_HUMAN]	147.672	27.34	13	1	3	7	128	13.8978	10.8872
P23458	Tyrosine-protein kinase JAK1 OS=Homo sapiens GN=JAK1 PE=1 SV=2 - [JAK1_HUMAN]	147.491	7.11	1	6	6	8	1154	133.191	7.54736
Q14956	Transmembrane glycoprotein NMB OS=Homo sapiens GN=GPNMB PE=1 SV=2 - [GPNMB_HUMAN]	147.21	4.72	1	2	2	5	572	63.8819	6.63916
Q9Y5P6	Mannose-1-phosphate guanyltransferase beta OS=Homo sapiens GN=GMPPB PE=1 SV=2 - [GMPPB_HUMAN]	146.28	10.56	1	3	3	4	360	39.8086	6.60986
O43681	ATPase ASNA1 OS=Homo sapiens GN=ASNA1 PE=1 SV=2 - [ASNA_HUMAN]	146.208	19.54	1	4	4	5	348	38.7674	4.90674
P40939	Trifunctional enzyme subunit alpha, mitochondrial OS=Homo sapiens GN=HADHA PE=1 SV=2 - [ECHA_HUMAN]	146.18	5.5	1	2	2	3	763	82.9469	9.0415
P02462	Collagen alpha-1(IV) chain OS=Homo sapiens OX=9606 GN=COL4A1 PE=1 SV=4 - [CO4A1_HUMAN]	146.083	1.44	2	2	2	3	1669	160.51	8.27979
P54578	Ubiquitin carboxyl-terminal hydrolase 14 OS=Homo sapiens GN=USP14 PE=1 SV=3 - [UBP14_HUMAN]	145.923	8.1	1	3	3	3	494	56.033	5.30029
P08237	6-phosphofructokinase, muscle type OS=Homo sapiens GN=PFKM PE=1 SV=2 - [K6PF_HUMAN]	145.768	5	1	2	4	9	780	85.1284	7.98682
Q15349	Ribosomal protein S6 kinase alpha-2 OS=Homo sapiens GN=RPS6KA2 PE=1 SV=2 - [KS6A2_HUMAN]	145.34	3.27	11	2	2	5	733	83.1861	8.67529
Q9NQS7	Inner centromere protein OS=Homo sapiens GN=INCENP PE=1 SV=3 - [INCE_HUMAN]	145.2	3.38	1	2	2	4	918	105.365	9.43701
Q02978	Mitochondrial 2-oxoglutarate/malate carrier protein OS=Homo sapiens GN=SLC25A11 PE=1 SV=3 - [M2OM_HUMAN]	145.01	5.1	1	1	1	2	314	34.0399	9.90576
Q99685	Monoglyceride lipase OS=Homo sapiens GN=MGLL PE=1 SV=2 - [MGLL_HUMAN]	143.87	13.2	1	3	3	4	303	33.2402	6.99072
Q9Y4H2	Insulin receptor substrate 2 OS=Homo sapiens GN=IRS2 PE=1 SV=2 - [IRS2_HUMAN]	143.49	2.91	1	2	2	2	1338	137.249	8.646
P04080	Cystatin-B OS=Homo sapiens GN=CSTB PE=1 SV=2 - [CYTB_HUMAN]	143.252	71.43	1	5	5	6	98	11.1326	7.56201
Q13561	Dynactin subunit 2 OS=Homo sapiens GN=DCTN2 PE=1 SV=4 - [DCTN2_HUMAN]	142.13	4.74	1	1	1	2	401	44.2039	5.21143
O43663	Protein regulator of cytokinesis 1 OS=Homo sapiens GN=PRC1 PE=1 SV=2 - [PRC1_HUMAN]	142.01	6.13	1	3	3	6	620	71.5616	6.68311
Q86T65	Disheveled-associated activator of morphogenesis 2 OS=Homo sapiens GN=DAAM2 PE=2 SV=3 - [DAAM2_HUMAN]	141.97	7.49	2	7	7	7	1068	123.42	6.80029
Q9UBQ5	Eukaryotic translation initiation factor 3 subunit K OS=Homo sapiens GN=EIF3K PE=1 SV=1 - [EIF3K_HUMAN]	141.92	11.47	1	2	2	5	218	25.0434	4.93213
Q99471	Prefoldin subunit 5 OS=Homo sapiens GN=PFDN5 PE=1 SV=2 - [PFD5_HUMAN]	141.89	23.38	1	2	2	4	154	17.317	6.32861
Q13867	Bleomycin hydrolase OS=Homo sapiens GN=BLMH PE=1 SV=1 - [BLMH_HUMAN]	141.573	9.45	1	3	3	6	455	52.528	6.26514
Q9Y666	Solute carrier family 12 member 7 OS=Homo sapiens GN=SLC12A7 PE=1 SV=3 - [S12A7_HUMAN]	141.17	6.56	2	4	4	5	1083	119.029	6.7124
Q9Y6B6	GTP-binding protein SAR1b OS=Homo sapiens GN=SAR1B PE=1 SV=1 - [SAR1B_HUMAN]	140.86	17.17	1	2	2	5	198	22.3955	6.11279
Q15437	Protein transport protein Sec23B OS=Homo sapiens GN=SEC23B PE=1 SV=2 - [SC23B_HUMAN]	140.82	3.52	1	1	2	3	767	86.4235	6.88818
Q7RTP6	Protein-methionine sulfoxide oxidase MICAL3 OS=Homo sapiens GN=MICAL3 PE=1 SV=2 - [MICA3_HUMAN]	140.756	1.95	1	3	3	3	2002	224.156	5.5542
P15121	Aldose reductase OS=Homo sapiens GN=AKR1B1 PE=1 SV=3 - [ALDR_HUMAN]	140.22	20.57	2	5	5	6	316	35.8305	6.97607
Q9P0V3	SH3 domain-binding protein 4 OS=Homo sapiens GN=SH3BP4 PE=1 SV=1 - [SH3B4_HUMAN]	140.01	4.78	1	3	3	4	963	107.428	7.7085
Q96CC6	Inactive rhomboid protein 1 OS=Homo sapiens GN=RHBDF1 PE=1 SV=2 - [RHDF1_HUMAN]	139.92	3.63	1	2	2	4	855	97.3385	8.44092
P12109	Collagen alpha-1(VI) chain OS=Homo sapiens GN=COL6A1 PE=1 SV=3 - [CO6A1_HUMAN]	139.505	4.18	1	3	3	5	1028	108.462	5.42725
Q13425	Beta-2-syntrophin OS=Homo sapiens GN=SNTB2 PE=1 SV=1 - [SNTB2_HUMAN]	139.467	5.56	1	3	3	4	540	57.913	8.82178
Q8IUX7	Adipocyte enhancer-binding protein 1 OS=Homo sapiens GN=AEBP1 PE=1 SV=1 - [AEBP1_HUMAN]	139.255	5.96	1	4	4	4	1158	130.847	5.10986
P42677	40S ribosomal protein S27 OS=Homo sapiens GN=RPS27 PE=1 SV=3 - [RS27_HUMAN]	138.498	28.57	1	1	2	4	84	9.45484	9.45166
Q9H254	Spectrin beta chain, brain 3 OS=Homo sapiens GN=SPTBN4 PE=1 SV=2 - [SPTN4_HUMAN]	138.465	1.05	1	1	3	6	2564	288.808	6.01123
Q8IYI6	Exocyst complex component 8 OS=Homo sapiens GN=EXOC8 PE=1 SV=2 - [EXOC8_HUMAN]	138.183	6.34	1	2	2	2	725	81.7474	5.49072
Q6P9B6	TLD domain-containing protein 1 OS=Homo sapiens GN=TLDC1 PE=1 SV=2 - [TLDC1_HUMAN]	138.12	4.39	1	1	1	2	456	50.9611	6.23975
Q7L9L4	MOB kinase activator 1B OS=Homo sapiens GN=MOB1B PE=1 SV=3 - [MOB1B_HUMAN]	138.058	20.37	2	4	4	6	216	25.0746	6.72705
P54619	5'-AMP-activated protein kinase subunit gamma-1 OS=Homo sapiens GN=PRKAG1 PE=1 SV=1 - [AAKG1_HUMAN]	137.35	11.48	2	3	3	3	331	37.5558	6.91748
O95235	Kinesin-like protein KIF20A OS=Homo sapiens GN=KIF20A PE=1 SV=1 - [KI20A_HUMAN]	137.07	4.61	1	3	3	4	890	100.215	6.91748
O15067	Phosphoribosylformylglycinamidine synthase OS=Homo sapiens GN=PFAS PE=1 SV=4 - [PUR4_HUMAN]	137.06	3.81	1	4	4	4	1338	144.643	5.75732
P04156	Major prion protein OS=Homo sapiens GN=PRNP PE=1 SV=1 - [PRIO_HUMAN]	137	4.74	1	1	1	2	253	27.6432	8.99756
Q9NP79	Vacuolar protein sorting-associated protein VTA1 homolog OS=Homo sapiens GN=VTA1 PE=1 SV=1 - [VTA1_HUMAN]	136.55	11.07	1	2	2	3	307	33.8579	6.29053
Q92625	Ankyrin repeat and SAM domain-containing protein 1A OS=Homo sapiens GN=ANKS1A PE=1 SV=4 - [ANS1A_HUMAN]	136.18	4.76	1	3	3	5	1134	123.032	6.37939
P39656	Dolichyl-diphosphooligosaccharide--protein glycosyltransferase 48 kDa subunit OS=Homo sapiens GN=DDOST PE=1 SV=4 - [OST48_HUMAN]	136.06	12.28	1	4	4	5	456	50.769	6.55127
O75695	Protein XRP2 OS=Homo sapiens GN=RP2 PE=1 SV=4 - [XRP2_HUMAN]	135.935	15.43	1	5	5	8	350	39.6155	5.12256
Q3LXA3	Bifunctional ATP-dependent dihydroxyacetone kinase/FAD-AMP lyase (cyclizing) OS=Homo sapiens GN=DAK PE=1 SV=2 - [DHAK_HUMAN]	135.69	5.74	1	2	2	2	575	58.91	7.48877
P52943	Cysteine-rich protein 2 OS=Homo sapiens GN=CRIP2 PE=1 SV=1 - [CRIP2_HUMAN]	135.66	7.69	1	1	1	2	208	22.478	8.71924
Q7Z6K1	THAP domain-containing protein 5 OS=Homo sapiens GN=THAP5 PE=1 SV=2 - [THAP5_HUMAN]	135.5	1.77	1	1	1	7	395	45.3879	6.7124
Q9NRY6	Phospholipid scramblase 3 OS=Homo sapiens GN=PLSCR3 PE=1 SV=2 - [PLS3_HUMAN]	135.44	6.78	1	1	1	1	295	31.628	6.65381
Q9BV44	THUMP domain-containing protein 3 OS=Homo sapiens GN=THUMPD3 PE=1 SV=1 - [THUM3_HUMAN]	135.12	2.96	1	1	1	2	507	56.9668	6.3667
Q93050	V-type proton ATPase 116 kDa subunit a isoform 1 OS=Homo sapiens GN=ATP6V0A1 PE=1 SV=3 - [VPP1_HUMAN]	135.11	6.45	1	4	4	5	837	96.3501	6.43018
Q9BTV4	Transmembrane protein 43 OS=Homo sapiens GN=TMEM43 PE=1 SV=1 - [TMM43_HUMAN]	135.05	16	1	3	3	5	400	44.8472	8.1333
Q93052	Lipoma-preferred partner OS=Homo sapiens GN=LPP PE=1 SV=1 - [LPP_HUMAN]	134.84	9.8	1	3	3	4	612	65.7038	7.37158
Q99523	Sortilin OS=Homo sapiens GN=SORT1 PE=1 SV=3 - [SORT_HUMAN]	134.383	3.01	1	2	2	3	831	92.0095	5.74463
P19623	Spermidine synthase OS=Homo sapiens GN=SRM PE=1 SV=1 - [SPEE_HUMAN]	134.21	19.54	1	4	4	5	302	33.8027	5.49072
P10599	Thioredoxin OS=Homo sapiens GN=TXN PE=1 SV=3 - [THIO_HUMAN]	133.98	23.81	1	2	2	4	105	11.7297	4.91943
Q15417	Calponin-3 OS=Homo sapiens GN=CNN3 PE=1 SV=1 - [CNN3_HUMAN]	133.94	13.37	1	3	3	4	329	36.3908	6.04932
P52789	Hexokinase-2 OS=Homo sapiens GN=HK2 PE=1 SV=2 - [HXK2_HUMAN]	133.783	2.94	2	2	2	3	917	102.313	6.04932
P49757	Protein numb homolog OS=Homo sapiens GN=NUMB PE=1 SV=2 - [NUMB_HUMAN]	133.6	4.76	1	3	3	4	651	70.7594	8.51416
Q96QD8	Sodium-coupled neutral amino acid transporter 2 OS=Homo sapiens GN=SLC38A2 PE=1 SV=2 - [S38A2_HUMAN]	133.48	4.15	1	1	1	2	506	55.9895	8.00146
Q12792	Twinfilin-1 OS=Homo sapiens GN=TWF1 PE=1 SV=3 - [TWF1_HUMAN]	133.47	3.71	1	1	1	2	350	40.2577	6.96143
P10301	Ras-related protein R-Ras OS=Homo sapiens GN=RRAS PE=1 SV=1 - [RRAS_HUMAN]	133.45	10.55	1	1	2	3	218	23.4659	6.93213
P20042	Eukaryotic translation initiation factor 2 subunit 2 OS=Homo sapiens GN=EIF2S2 PE=1 SV=2 - [IF2B_HUMAN]	133.257	12.31	1	4	4	6	333	38.3644	5.79541
Q92734	Protein TFG OS=Homo sapiens GN=TFG PE=1 SV=2 - [TFG_HUMAN]	133.007	8.75	4	3	3	6	400	43.4212	5.09717
Q16666	Gamma-interferon-inducible protein 16 OS=Homo sapiens GN=IFI16 PE=1 SV=3 - [IF16_HUMAN]	132.87	10.7	1	6	6	6	785	88.1994	9.27588
Q6UWP8	Suprabasin OS=Homo sapiens GN=SBSN PE=1 SV=2 - [SBSN_HUMAN]	132.76	6.1	1	1	1	4	590	60.5046	7.00537
P48960	CD97 antigen OS=Homo sapiens GN=CD97 PE=1 SV=4 - [CD97_HUMAN]	132.16	4.43	1	2	2	4	835	91.8091	6.87354
O14936	Peripheral plasma membrane protein CASK OS=Homo sapiens GN=CASK PE=1 SV=3 - [CSKP_HUMAN]	131.866	5.51	1	3	3	3	926	105.056	6.43018
Q9NXU5	ADP-ribosylation factor-like protein 15 OS=Homo sapiens GN=ARL15 PE=1 SV=1 - [ARL15_HUMAN]	131.57	6.37	1	1	1	2	204	22.8615	5.63037
P08243	Asparagine synthetase [glutamine-hydrolyzing] OS=Homo sapiens GN=ASNS PE=1 SV=4 - [ASNS_HUMAN]	131.32	5.53	1	3	3	5	561	64.3286	6.85889
P51659	Peroxisomal multifunctional enzyme type 2 OS=Homo sapiens GN=HSD17B4 PE=1 SV=3 - [DHB4_HUMAN]	130.8	3.67	1	2	2	2	736	79.6363	8.83643
Q9Y639	Neuroplastin OS=Homo sapiens GN=NPTN PE=1 SV=2 - [NPTN_HUMAN]	130.417	11.31	1	3	3	4	398	44.3595	7.98682
Q00013	55 kDa erythrocyte membrane protein OS=Homo sapiens GN=MPP1 PE=1 SV=2 - [EM55_HUMAN]	130.41	8.58	1	2	2	2	466	52.2636	7.37158
P17844	Probable ATP-dependent RNA helicase DDX5 OS=Homo sapiens GN=DDX5 PE=1 SV=1 - [DDX5_HUMAN]	130.303	6.68	1	1	4	8	614	69.1047	8.92432
Q96BY6	Dedicator of cytokinesis protein 10 OS=Homo sapiens GN=DOCK10 PE=1 SV=3 - [DOC10_HUMAN]	129.74	1.88	1	3	3	4	2186	249.373	7.13721
Q9NZA1	Chloride intracellular channel protein 5 OS=Homo sapiens GN=CLIC5 PE=1 SV=3 - [CLIC5_HUMAN]	129.706	5.61	3	1	2	5	410	46.4737	4.81787
P35080	Profilin-2 OS=Homo sapiens GN=PFN2 PE=1 SV=3 - [PROF2_HUMAN]	129.34	37.86	1	3	3	3	140	15.0363	6.99072
Q9UGH3	Solute carrier family 23 member 2 OS=Homo sapiens GN=SLC23A2 PE=1 SV=1 - [S23A2_HUMAN]	129.206	3.69	1	2	2	2	650	70.2914	7.6792
Q15393	Splicing factor 3B subunit 3 OS=Homo sapiens GN=SF3B3 PE=1 SV=4 - [SF3B3_HUMAN]	128.49	3.94	1	3	3	4	1217	135.492	5.26221
Q9BSL1	Ubiquitin-associated domain-containing protein 1 OS=Homo sapiens GN=UBAC1 PE=1 SV=1 - [UBAC1_HUMAN]	128.21	6.42	1	1	1	2	405	45.31	4.91943
P57729	Ras-related protein Rab-38 OS=Homo sapiens GN=RAB38 PE=1 SV=1 - [RAB38_HUMAN]	127.481	15.17	2	3	3	4	211	23.697	7.76709
P00568	Adenylate kinase isoenzyme 1 OS=Homo sapiens GN=AK1 PE=1 SV=3 - [KAD1_HUMAN]	126.91	13.4	1	2	2	3	194	21.6213	8.63135
P11766	Alcohol dehydrogenase class-3 OS=Homo sapiens GN=ADH5 PE=1 SV=4 - [ADHX_HUMAN]	125.303	13.37	1	4	4	6	374	39.6984	7.48877
O15305	Phosphomannomutase 2 OS=Homo sapiens GN=PMM2 PE=1 SV=1 - [PMM2_HUMAN]	125.047	18.29	1	3	3	3	246	28.0642	6.771
O43324	Eukaryotic translation elongation factor 1 epsilon-1 OS=Homo sapiens GN=EEF1E1 PE=1 SV=1 - [MCA3_HUMAN]	124.991	27.01	1	3	3	5	174	19.7983	8.54346
P28062	Proteasome subunit beta type-8 OS=Homo sapiens GN=PSMB8 PE=1 SV=3 - [PSB8_HUMAN]	124.62	10.14	1	2	2	2	276	30.3346	7.43018
Q99988	Growth/differentiation factor 15 OS=Homo sapiens GN=GDF15 PE=2 SV=3 - [GDF15_HUMAN]	124.466	5.52	1	2	2	3	308	34.1188	9.65674
P36551	Coproporphyrinogen-III oxidase, mitochondrial OS=Homo sapiens GN=CPOX PE=1 SV=3 - [HEM6_HUMAN]	124.137	5.29	1	2	2	3	454	50.12	8.25049
O43447	Peptidyl-prolyl cis-trans isomerase H OS=Homo sapiens GN=PPIH PE=1 SV=1 - [PPIH_HUMAN]	123.98	14.12	1	1	1	2	177	19.1956	8.07471
P46060	Ran GTPase-activating protein 1 OS=Homo sapiens GN=RANGAP1 PE=1 SV=1 - [RAGP1_HUMAN]	123.234	7.84	1	4	4	4	587	63.5023	4.67822
P49419	Alpha-aminoadipic semialdehyde dehydrogenase OS=Homo sapiens GN=ALDH7A1 PE=1 SV=5 - [AL7A1_HUMAN]	123.17	7.42	1	3	3	4	539	58.4501	7.98682
Q7L1Q6	Basic leucine zipper and W2 domain-containing protein 1 OS=Homo sapiens GN=BZW1 PE=1 SV=1 - [BZW1_HUMAN]	122.817	17.66	1	3	4	7	419	48.0127	5.92236
P48735	Isocitrate dehydrogenase [NADP], mitochondrial OS=Homo sapiens GN=IDH2 PE=1 SV=2 - [IDHP_HUMAN]	122.35	8.19	1	2	3	5	452	50.8769	8.68994
Q5D862	Filaggrin-2 OS=Homo sapiens GN=FLG2 PE=1 SV=1 - [FILA2_HUMAN]	121.75	2.72	1	3	3	5	2391	247.928	8.30908
Q96PY5	Formin-like protein 2 OS=Homo sapiens GN=FMNL2 PE=1 SV=3 - [FMNL2_HUMAN]	121.552	4.14	1	2	4	5	1086	123.243	7.40088
P23921	Ribonucleoside-diphosphate reductase large subunit OS=Homo sapiens GN=RRM1 PE=1 SV=1 - [RIR1_HUMAN]	121.35	3.16	1	2	2	2	792	90.0125	7.15186
Q12959	Disks large homolog 1 OS=Homo sapiens GN=DLG1 PE=1 SV=2 - [DLG1_HUMAN]	121.2	8.63	3	5	5	10	904	100.393	5.75732
Q9UKE5	TRAF2 and NCK-interacting protein kinase OS=Homo sapiens GN=TNIK PE=1 SV=1 - [TNIK_HUMAN]	120.759	4.63	1	2	5	5	1360	154.848	7.1665
O15511	Actin-related protein 2/3 complex subunit 5 OS=Homo sapiens GN=ARPC5 PE=1 SV=3 - [ARPC5_HUMAN]	120.715	21.85	1	2	3	3	151	16.3103	5.66846
P46778	60S ribosomal protein L21 OS=Homo sapiens GN=RPL21 PE=1 SV=2 - [RL21_HUMAN]	120.45	20.63	1	3	3	6	160	18.5531	10.4917
Q6P5R6	60S ribosomal protein L22-like 1 OS=Homo sapiens GN=RPL22L1 PE=1 SV=2 - [RL22L_HUMAN]	119.27	19.67	1	1	1	2	122	14.5976	9.37842
Q9Y4Y9	U6 snRNA-associated Sm-like protein LSm5 OS=Homo sapiens GN=LSM5 PE=1 SV=3 - [LSM5_HUMAN]	119.03	20.88	1	1	1	2	91	9.93113	4.53857
Q01469	Fatty acid-binding protein, epidermal OS=Homo sapiens GN=FABP5 PE=1 SV=3 - [FABP5_HUMAN]	118.03	13.33	1	2	2	3	135	15.1546	7.00537
P14174	Macrophage migration inhibitory factor OS=Homo sapiens GN=MIF PE=1 SV=4 - [MIF_HUMAN]	118.002	35.65	1	3	3	5	115	12.4682	7.88428
Q9NYL9	Tropomodulin-3 OS=Homo sapiens GN=TMOD3 PE=1 SV=1 - [TMOD3_HUMAN]	117.804	8.24	2	2	2	2	352	39.5703	5.18604
Q9Y5M8	Signal recognition particle receptor subunit beta OS=Homo sapiens GN=SRPRB PE=1 SV=3 - [SRPRB_HUMAN]	117.413	16.97	1	3	3	3	271	29.6838	9.0415
Q92879	CUGBP Elav-like family member 1 OS=Homo sapiens GN=CELF1 PE=1 SV=2 - [CELF1_HUMAN]	117.357	2.67	1	1	1	3	486	52.0299	8.45557
Q00169	Phosphatidylinositol transfer protein alpha isoform OS=Homo sapiens GN=PITPNA PE=1 SV=2 - [PIPNA_HUMAN]	117.15	7.04	1	1	1	1	270	31.786	6.55127
Q13501	Sequestosome-1 OS=Homo sapiens GN=SQSTM1 PE=1 SV=1 - [SQSTM_HUMAN]	116.983	9.09	1	2	2	3	440	47.6569	5.22412
P49589	Cysteine--tRNA ligase, cytoplasmic OS=Homo sapiens GN=CARS PE=1 SV=3 - [SYCC_HUMAN]	116.397	2.94	1	2	2	3	748	85.4192	6.75635
P49257	Protein ERGIC-53 OS=Homo sapiens GN=LMAN1 PE=1 SV=2 - [LMAN1_HUMAN]	116.178	6.08	1	2	2	2	510	57.513	6.771
Q8IVF7	Formin-like protein 3 OS=Homo sapiens GN=FMNL3 PE=1 SV=3 - [FMNL3_HUMAN]	116.042	3.11	1	1	3	4	1028	117.139	6.65381
Q9HD67	Unconventionnal myosin-X OS=Homo sapiens GN=MYO10 PE=1 SV=3 - [MYO10_HUMAN]	116.04	1.51	1	2	2	2	2058	237.198	6.21436
Q9NYU2	UDP-glucose:glycoprotein glucosyltransferase 1 OS=Homo sapiens GN=UGGT1 PE=1 SV=3 - [UGGG1_HUMAN]	116	2.83	1	2	2	2	1555	177.078	5.63037
Q96FZ7	Charged multivesicular body protein 6 OS=Homo sapiens GN=CHMP6 PE=1 SV=3 - [CHMP6_HUMAN]	115.732	9.45	2	2	2	2	201	23.4703	5.31299
Q15369	Transcription elongation factor B polypeptide 1 OS=Homo sapiens GN=TCEB1 PE=1 SV=1 - [ELOC_HUMAN]	115.688	28.57	1	2	2	2	112	12.465	4.77979
P06753	Tropomyosin alpha-3 chain OS=Homo sapiens GN=TPM3 PE=1 SV=2 - [TPM3_HUMAN]	115.083	7.37	3	2	3	4	285	32.9298	4.71631
P09874	Poly [ADP-ribose] polymerase 1 OS=Homo sapiens GN=PARP1 PE=1 SV=4 - [PARP1_HUMAN]	114.687	3.85	1	3	3	3	1014	113.012	8.88037
Q6DD88	Atlastin-3 OS=Homo sapiens GN=ATL3 PE=1 SV=1 - [ATLA3_HUMAN]	114.53	12.2	1	4	4	4	541	60.5034	5.65576
P08962	CD63 antigen OS=Homo sapiens GN=CD63 PE=1 SV=2 - [CD63_HUMAN]	114.364	4.2	1	1	1	2	238	25.6191	7.81104
Q09028	Histone-binding protein RBBP4 OS=Homo sapiens GN=RBBP4 PE=1 SV=3 - [RBBP4_HUMAN]	113.96	5.88	1	1	2	5	425	47.6261	4.89404
O43264	Centromere/kinetochore protein zw10 homolog OS=Homo sapiens GN=ZW10 PE=1 SV=3 - [ZW10_HUMAN]	113.58	3.21	1	2	2	2	779	88.7729	6.26514
Q13126	S-methyl-5'-thioadenosine phosphorylase OS=Homo sapiens GN=MTAP PE=1 SV=2 - [MTAP_HUMAN]	113.571	18.37	1	3	3	6	283	31.2158	7.18115
Q8NG11	Tetraspanin-14 OS=Homo sapiens GN=TSPAN14 PE=1 SV=1 - [TSN14_HUMAN]	113.473	10.37	1	2	2	3	270	30.6706	6.84424
Q9H2G2	STE20-like serine/threonine-protein kinase OS=Homo sapiens GN=SLK PE=1 SV=1 - [SLK_HUMAN]	113.35	2.83	1	2	3	4	1235	142.607	5.14795
Q16643	Drebrin OS=Homo sapiens GN=DBN1 PE=1 SV=4 - [DREB_HUMAN]	113.207	2.47	1	1	1	3	649	71.3854	4.44971
P61289	Proteasome activator complex subunit 3 OS=Homo sapiens GN=PSME3 PE=1 SV=1 - [PSME3_HUMAN]	112.834	8.66	1	2	2	2	254	29.4876	5.94775
Q96RD7	Pannexin-1 OS=Homo sapiens GN=PANX1 PE=1 SV=4 - [PANX1_HUMAN]	112.35	13.15	1	3	3	4	426	48.019	6.01123
Q92530	Proteasome inhibitor PI31 subunit OS=Homo sapiens GN=PSMF1 PE=1 SV=2 - [PSMF1_HUMAN]	111.66	6.27	1	1	1	2	271	29.798	5.74463
P56192	Methionine--tRNA ligase, cytoplasmic OS=Homo sapiens GN=MARS PE=1 SV=2 - [SYMC_HUMAN]	111.595	5.33	1	4	4	6	900	101.052	6.16357
P17813	Endoglin OS=Homo sapiens GN=ENG PE=1 SV=2 - [EGLN_HUMAN]	111.513	4.56	1	2	2	3	658	70.5331	6.60986
Q12905	Interleukin enhancer-binding factor 2 OS=Homo sapiens GN=ILF2 PE=1 SV=2 - [ILF2_HUMAN]	111.471	14.62	1	3	3	3	390	43.0352	5.26221
Q9C0B5	Palmitoyltransferase ZDHHC5 OS=Homo sapiens GN=ZDHHC5 PE=1 SV=2 - [ZDHC5_HUMAN]	111.243	2.94	1	1	1	3	715	77.4961	9.01221
Q9NRW7	Vacuolar protein sorting-associated protein 45 OS=Homo sapiens GN=VPS45 PE=1 SV=1 - [VPS45_HUMAN]	111.148	4.56	1	2	2	3	570	65.0358	8.23584
P62857	40S ribosomal protein S28 OS=Homo sapiens GN=RPS28 PE=1 SV=1 - [RS28_HUMAN]	110.93	17.39	1	1	1	2	69	7.8362	10.6968
Q9UBQ0	Vacuolar protein sorting-associated protein 29 OS=Homo sapiens GN=VPS29 PE=1 SV=1 - [VPS29_HUMAN]	110.6	12.64	1	2	2	3	182	20.4927	6.78564
P0C0S5	Histone H2A.Z OS=Homo sapiens GN=H2AFZ PE=1 SV=2 - [H2AZ_HUMAN]	110.092	35.16	5	1	3	5	128	13.5446	10.5796
Q9P253	Vacuolar protein sorting-associated protein 18 homolog OS=Homo sapiens GN=VPS18 PE=1 SV=2 - [VPS18_HUMAN]	110.09	1.34	1	1	1	2	973	110.116	6.07471
P42224	Signal transducer and activator of transcription 1-alpha/beta OS=Homo sapiens GN=STAT1 PE=1 SV=2 - [STAT1_HUMAN]	109.89	6.27	1	4	4	4	750	87.2795	6.04932
P29218	Inositol monophosphatase 1 OS=Homo sapiens GN=IMPA1 PE=1 SV=1 - [IMPA1_HUMAN]	109.71	8.66	1	2	2	3	277	30.1692	5.26221
Q15631	Translin OS=Homo sapiens GN=TSN PE=1 SV=1 - [TSN_HUMAN]	109.667	6.58	1	2	2	3	228	26.1668	6.44287
O60610	Protein diaphanous homolog 1 OS=Homo sapiens GN=DIAPH1 PE=1 SV=2 - [DIAP1_HUMAN]	109.52	1.42	1	1	1	1	1272	141.258	5.41455
Q6NYC8	Phostensin OS=Homo sapiens GN=PPP1R18 PE=1 SV=1 - [PPR18_HUMAN]	109.48	11.58	1	4	4	4	613	67.9015	5.40186
P49720	Proteasome subunit beta type-3 OS=Homo sapiens GN=PSMB3 PE=1 SV=2 - [PSB3_HUMAN]	109.443	16.59	1	2	2	2	205	22.9335	6.55127
Q9NVJ2	ADP-ribosylation factor-like protein 8B OS=Homo sapiens GN=ARL8B PE=1 SV=1 - [ARL8B_HUMAN]	108.79	28.49	2	3	3	4	186	21.5251	8.42627
Q3KQV9	UDP-N-acetylhexosamine pyrophosphorylase-like protein 1 OS=Homo sapiens GN=UAP1L1 PE=2 SV=2 - [UAP1L_HUMAN]	108.659	5.72	2	2	2	2	507	56.9944	6.31592
P43378	Tyrosine-protein phosphatase non-receptor type 9 OS=Homo sapiens GN=PTPN9 PE=1 SV=1 - [PTN9_HUMAN]	108.51	1.69	1	1	1	2	593	67.9768	8.01611
P36507	Dual specificity mitogen-activated protein kinase kinase 2 OS=Homo sapiens GN=MAP2K2 PE=1 SV=1 - [MP2K2_HUMAN]	108.4	9.25	1	2	3	5	400	44.3961	6.55127
P42566	Epidermal growth factor receptor substrate 15 OS=Homo sapiens GN=EPS15 PE=1 SV=2 - [EPS15_HUMAN]	107.97	2.23	1	1	1	1	896	98.5948	4.64014
Q16630	Cleavage and polyadenylation specificity factor subunit 6 OS=Homo sapiens GN=CPSF6 PE=1 SV=2 - [CPSF6_HUMAN]	107.803	4.54	1	1	1	3	551	59.1734	7.15186
Q01433	AMP deaminase 2 OS=Homo sapiens GN=AMPD2 PE=1 SV=2 - [AMPD2_HUMAN]	107.125	4.21	1	3	3	4	879	100.624	6.93213
P46439	Glutathione S-transferase Mu 5 OS=Homo sapiens GN=GSTM5 PE=1 SV=3 - [GSTM5_HUMAN]	107.07	11.93	4	1	2	3	218	25.6582	7.38623
P51665	26S proteasome non-ATPase regulatory subunit 7 OS=Homo sapiens GN=PSMD7 PE=1 SV=2 - [PSD7_HUMAN]	106.939	12.65	1	2	2	2	324	37.0025	6.771
P42025	Beta-centractin OS=Homo sapiens GN=ACTR1B PE=1 SV=1 - [ACTY_HUMAN]	105.85	12.5	1	1	3	4	376	42.2667	6.40479
Q16186	Proteasomal ubiquitin receptor ADRM1 OS=Homo sapiens GN=ADRM1 PE=1 SV=2 - [ADRM1_HUMAN]	105.6	3.69	1	1	1	2	407	42.1268	5.07178
Q96JJ7	Protein disulfide-isomerase TMX3 OS=Homo sapiens GN=TMX3 PE=1 SV=2 - [TMX3_HUMAN]	105.54	5.29	1	2	2	2	454	51.8389	4.90674
P16930	Fumarylacetoacetase OS=Homo sapiens GN=FAH PE=1 SV=2 - [FAAA_HUMAN]	105.25	16.47	1	4	4	6	419	46.3442	6.94678
Q9NPH2	Inositol-3-phosphate synthase 1 OS=Homo sapiens GN=ISYNA1 PE=1 SV=1 - [INO1_HUMAN]	104.84	5.02	1	1	1	1	558	61.0291	5.75732
P17174	Aspartate aminotransferase, cytoplasmic OS=Homo sapiens GN=GOT1 PE=1 SV=3 - [AATC_HUMAN]	104.833	9.69	1	2	2	3	413	46.2185	7.00537
P49189	4-trimethylaminobutyraldehyde dehydrogenase OS=Homo sapiens GN=ALDH9A1 PE=1 SV=3 - [AL9A1_HUMAN]	104.7	7.29	1	3	3	4	494	53.767	5.87158
P06493	Cyclin-dependent kinase 1 OS=Homo sapiens GN=CDK1 PE=1 SV=3 - [CDK1_HUMAN]	104.669	6.4	23	1	2	3	297	34.0739	8.39697
P45880	Voltage-dependent anion-selective channel protein 2 OS=Homo sapiens GN=VDAC2 PE=1 SV=2 - [VDAC2_HUMAN]	104.64	18.71	1	4	4	4	294	31.5465	7.56201
Q13136	Liprin-alpha-1 OS=Homo sapiens GN=PPFIA1 PE=1 SV=1 - [LIPA1_HUMAN]	104.073	3.08	1	2	2	4	1202	135.695	6.29053
Q13523	Serine/threonine-protein kinase PRP4 homolog OS=Homo sapiens GN=PRPF4B PE=1 SV=3 - [PRP4B_HUMAN]	103.76	1.29	1	1	1	2	1007	116.916	10.2573
Q9UL26	Ras-related protein Rab-22A OS=Homo sapiens GN=RAB22A PE=1 SV=2 - [RB22A_HUMAN]	103.75	15.46	1	2	2	3	194	21.8412	8.14795
P08648	Integrin alpha-5 OS=Homo sapiens GN=ITGA5 PE=1 SV=2 - [ITA5_HUMAN]	103.69	5.24	1	3	3	3	1049	114.465	5.77002
Q13557	Calcium/calmodulin-dependent protein kinase type II subunit delta OS=Homo sapiens GN=CAMK2D PE=1 SV=3 - [KCC2D_HUMAN]	103.443	5.61	4	2	2	2	499	56.3336	7.25439
Q96JB2	Conserved oligomeric Golgi complex subunit 3 OS=Homo sapiens GN=COG3 PE=1 SV=3 - [COG3_HUMAN]	103.371	1.81	1	1	1	2	828	94.0363	5.56689
P19256	Lymphocyte function-associated antigen 3 OS=Homo sapiens GN=CD58 PE=1 SV=1 - [LFA3_HUMAN]	103.23	10	1	2	2	2	250	28.1289	6.75635
Q6IQ22	Ras-related protein Rab-12 OS=Homo sapiens GN=RAB12 PE=1 SV=3 - [RAB12_HUMAN]	103.11	12.7	1	2	2	2	244	27.2311	8.41162
Q9Y6C9	Mitochondrial carrier homolog 2 OS=Homo sapiens GN=MTCH2 PE=1 SV=1 - [MTCH2_HUMAN]	101.82	7.92	1	1	1	5	303	33.3089	7.97217
Q9BY67	Cell adhesion molecule 1 OS=Homo sapiens GN=CADM1 PE=1 SV=2 - [CADM1_HUMAN]	101.815	2.94	1	1	1	2	442	48.4784	5.07178
P11717	Cation-independent mannose-6-phosphate receptor OS=Homo sapiens GN=IGF2R PE=1 SV=3 - [MPRI_HUMAN]	101.365	1.57	1	3	3	4	2491	274.199	5.93506
Q00325	Phosphate carrier protein, mitochondrial OS=Homo sapiens GN=SLC25A3 PE=1 SV=2 - [MPCP_HUMAN]	101.212	5.25	1	2	2	3	362	40.0687	9.37842
Q04323	UBX domain-containing protein 1 OS=Homo sapiens GN=UBXN1 PE=1 SV=2 - [UBXN1_HUMAN]	100.89	11.78	1	2	2	2	297	33.3049	5.24951
Q16576	Histone-binding protein RBBP7 OS=Homo sapiens GN=RBBP7 PE=1 SV=1 - [RBBP7_HUMAN]	100.8	5.88	1	1	2	4	425	47.7902	5.04639
Q68D91	Metallo-beta-lactamase domain-containing protein 2 OS=Homo sapiens GN=MBLAC2 PE=1 SV=3 - [MBLC2_HUMAN]	100.74	4.66	1	1	1	2	279	31.352	6.91748
Q9BY32	Inosine triphosphate pyrophosphatase OS=Homo sapiens GN=ITPA PE=1 SV=2 - [ITPA_HUMAN]	99.86	15.98	1	2	2	2	194	21.4319	5.65576
Q7Z2W4	Zinc finger CCCH-type antiviral protein 1 OS=Homo sapiens GN=ZC3HAV1 PE=1 SV=3 - [ZCCHV_HUMAN]	99.73	10.2	1	5	5	6	902	101.367	8.39697
Q9UBB4	Ataxin-10 OS=Homo sapiens GN=ATXN10 PE=1 SV=1 - [ATX10_HUMAN]	99.71	5.26	1	2	2	3	475	53.4548	5.24951
P50281	Matrix metalloproteinase-14 OS=Homo sapiens GN=MMP14 PE=1 SV=3 - [MMP14_HUMAN]	99.542	8.42	1	5	5	6	582	65.852	7.76709
Q15029	116 kDa U5 small nuclear ribonucleoprotein component OS=Homo sapiens GN=EFTUD2 PE=1 SV=1 - [U5S1_HUMAN]	98.94	5.45	1	3	4	5	972	109.366	4.99561
Q13158	FAS-associated death domain protein OS=Homo sapiens GN=FADD PE=1 SV=1 - [FADD_HUMAN]	98.85	11.54	1	1	1	2	208	23.2648	5.69385
P35637	RNA-binding protein FUS OS=Homo sapiens GN=FUS PE=1 SV=1 - [FUS_HUMAN]	98.8109	7.22	2	2	2	3	526	53.3938	9.36377
P01909	HLA class II histocompatibility antigen, DQ alpha 1 chain OS=Homo sapiens GN=HLA-DQA1 PE=1 SV=1 - [DQA1_HUMAN]	98.75	5.51	1	1	1	2	254	27.7872	5.71924
Q9UBT2	SUMO-activating enzyme subunit 2 OS=Homo sapiens GN=UBA2 PE=1 SV=2 - [SAE2_HUMAN]	98.66	6.25	1	3	3	5	640	71.1792	5.2876
Q96GG9	DCN1-like protein 1 OS=Homo sapiens GN=DCUN1D1 PE=1 SV=1 - [DCNL1_HUMAN]	98.41	10.81	1	2	2	2	259	30.1051	5.33838
Q9BPX5	Actin-related protein 2/3 complex subunit 5-like protein OS=Homo sapiens GN=ARPC5L PE=1 SV=1 - [ARP5L_HUMAN]	98.13	13.73	1	1	2	2	153	16.9308	6.59521
Q9NZN4	EH domain-containing protein 2 OS=Homo sapiens GN=EHD2 PE=1 SV=2 - [EHD2_HUMAN]	98.0633	9.58	1	2	3	3	543	61.1227	6.45557
Q9UKG1	DCC-interacting protein 13-alpha OS=Homo sapiens GN=APPL1 PE=1 SV=1 - [DP13A_HUMAN]	97.6933	7.62	1	3	3	3	709	79.6136	5.41455
Q9UNF0	Protein kinase C and casein kinase substrate in neurons protein 2 OS=Homo sapiens GN=PACSIN2 PE=1 SV=2 - [PACN2_HUMAN]	97.62	10.49	1	4	4	4	486	55.7039	5.19873
P55957	BH3-interacting domain death agonist OS=Homo sapiens GN=BID PE=1 SV=1 - [BID_HUMAN]	97.32	7.69	1	1	1	1	195	21.981	5.43994
Q16831	Uridine phosphorylase 1 OS=Homo sapiens GN=UPP1 PE=1 SV=1 - [UPP1_HUMAN]	97.2862	15.48	1	5	5	7	310	33.9122	7.88428
Q14195	Dihydropyrimidinase-related protein 3 OS=Homo sapiens GN=DPYSL3 PE=1 SV=1 - [DPYL3_HUMAN]	96.8559	5.26	1	1	2	2	570	61.9241	6.49365
Q9H3U1	Protein unc-45 homolog A OS=Homo sapiens GN=UNC45A PE=1 SV=1 - [UN45A_HUMAN]	96.8133	3.28	1	2	2	3	944	103.011	6.07471
P18084	Integrin beta-5 OS=Homo sapiens GN=ITGB5 PE=1 SV=1 - [ITB5_HUMAN]	96.6733	5.13	1	3	3	3	799	87.9962	6.06201
P61353	60S ribosomal protein L27 OS=Homo sapiens GN=RPL27 PE=1 SV=2 - [RL27_HUMAN]	96.1932	31.62	1	4	4	6	136	15.7877	10.5649
P53990	IST1 homolog OS=Homo sapiens GN=IST1 PE=1 SV=1 - [IST1_HUMAN]	95.7889	7.14	1	2	2	2	364	39.7255	5.35107
Q9P035	3-hydroxyacyl-CoA dehydratase 3 OS=Homo sapiens GN=PTPLAD1 PE=1 SV=2 - [HACD3_HUMAN]	95.71	5.8	1	1	1	2	362	43.1316	8.93896
Q96FN4	Copine-2 OS=Homo sapiens GN=CPNE2 PE=1 SV=3 - [CPNE2_HUMAN]	95.34	4.38	7	1	2	4	548	61.1506	6.07471
Q9Y2G3	Probable phospholipid-transporting ATPase IF OS=Homo sapiens GN=ATP11B PE=1 SV=2 - [AT11B_HUMAN]	95.25	1.27	1	1	1	2	1177	134.104	6.96143
Q96GD4	Aurora kinase B OS=Homo sapiens GN=AURKB PE=1 SV=3 - [AURKB_HUMAN]	95.146	8.43	2	2	2	3	344	39.2856	9.29053
P63208	S-phase kinase-associated protein 1 OS=Homo sapiens GN=SKP1 PE=1 SV=2 - [SKP1_HUMAN]	95.09	17.79	1	2	2	2	163	18.6462	4.53857
P61513	60S ribosomal protein L37a OS=Homo sapiens GN=RPL37A PE=1 SV=2 - [RL37A_HUMAN]	94.65	19.57	1	1	1	1	92	10.2685	10.4331
Q9UNM6	26S proteasome non-ATPase regulatory subunit 13 OS=Homo sapiens GN=PSMD13 PE=1 SV=2 - [PSD13_HUMAN]	94.12	14.1	1	5	5	6	376	42.9181	5.80811
Q9NV96	Cell cycle control protein 50A OS=Homo sapiens GN=TMEM30A PE=1 SV=1 - [CC50A_HUMAN]	93.85	6.65	1	2	2	3	361	40.6576	8.5874
Q8WWI5	Choline transporter-like protein 1 OS=Homo sapiens GN=SLC44A1 PE=1 SV=1 - [CTL1_HUMAN]	93.61	2.13	1	1	1	2	657	73.2533	8.60205
A0A1B0GUS4	Ubiquitin-conjugating enzyme E2 L5 OS=Homo sapiens OX=9606 GN=UBE2L5 PE=2 SV=1 - [UB2L5_HUMAN]	93.59	20.13	2	2	2	4	154	17.8642	7.84033
Q8TEX9	Importin-4 OS=Homo sapiens GN=IPO4 PE=1 SV=2 - [IPO4_HUMAN]	93.4426	3.42	1	3	3	3	1081	118.64	4.95752
P46779	60S ribosomal protein L28 OS=Homo sapiens GN=RPL28 PE=1 SV=3 - [RL28_HUMAN]	93.4241	12.41	1	2	2	4	137	15.7377	12.0151
P46926	Glucosamine-6-phosphate isomerase 1 OS=Homo sapiens GN=GNPDA1 PE=1 SV=1 - [GNPI1_HUMAN]	93.3433	7.27	2	2	2	3	289	32.6476	6.91748
P28072	Proteasome subunit beta type-6 OS=Homo sapiens GN=PSMB6 PE=1 SV=4 - [PSB6_HUMAN]	93.34	20.92	1	2	2	3	239	25.3414	4.91943
Q13263	Transcription intermediary factor 1-beta OS=Homo sapiens GN=TRIM28 PE=1 SV=5 - [TIF1B_HUMAN]	93.12	4.43	1	2	2	2	835	88.4934	5.77002
P53801	Pituitary tumor-transforming gene 1 protein-interacting protein OS=Homo sapiens GN=PTTG1IP PE=1 SV=1 - [PTTG_HUMAN]	93.01	10	1	1	1	1	180	20.3102	8.79248
Q9NUP9	Protein lin-7 homolog C OS=Homo sapiens GN=LIN7C PE=1 SV=1 - [LIN7C_HUMAN]	92.95	13.2	3	2	2	3	197	21.8205	8.42627
P39019	40S ribosomal protein S19 OS=Homo sapiens GN=RPS19 PE=1 SV=2 - [RS19_HUMAN]	92.261	20.69	1	3	3	3	145	16.0505	10.3159
P46734	Dual specificity mitogen-activated protein kinase kinase 3 OS=Homo sapiens GN=MAP2K3 PE=1 SV=2 - [MP2K3_HUMAN]	91.99	9.8	1	2	2	3	347	39.2929	7.43018
Q9NR50	Translation initiation factor eIF-2B subunit gamma OS=Homo sapiens GN=EIF2B3 PE=1 SV=1 - [EI2BG_HUMAN]	91.65	3.32	1	1	1	1	452	50.208	6.46826
Q9NRN7	L-aminoadipate-semialdehyde dehydrogenase-phosphopantetheinyl transferase OS=Homo sapiens GN=AASDHPPT PE=1 SV=2 - [ADPPT_HUMAN]	91.53	5.5	1	1	1	2	309	35.7531	6.80029
P67936	Tropomyosin alpha-4 chain OS=Homo sapiens GN=TPM4 PE=1 SV=3 - [TPM4_HUMAN]	91.5154	8.06	3	1	2	2	248	28.5045	4.69092
P63167	Dynein light chain 1, cytoplasmic OS=Homo sapiens GN=DYNLL1 PE=1 SV=1 - [DYL1_HUMAN]	91.4	24.72	1	1	1	1	89	10.3591	7.40088
Q8WU68	Splicing factor U2AF 26 kDa subunit OS=Homo sapiens GN=U2AF1L4 PE=1 SV=2 - [U2AF4_HUMAN]	91.19	5.45	2	1	1	2	220	25.7272	7.15186
Q9BT78	COP9 signalosome complex subunit 4 OS=Homo sapiens GN=COPS4 PE=1 SV=1 - [CSN4_HUMAN]	91.14	4.93	1	1	1	1	406	46.2397	5.8335
Q6NXT2	Histone H3.3C OS=Homo sapiens GN=H3F3C PE=1 SV=3 - [H3C_HUMAN]	90.6172	11.85	5	2	2	4	135	15.2044	11.1069
Q53T59	HCLS1-binding protein 3 OS=Homo sapiens GN=HS1BP3 PE=1 SV=1 - [H1BP3_HUMAN]	90.55	4.34	1	1	1	2	392	42.7539	5.0083
Q13131	5'-AMP-activated protein kinase catalytic subunit alpha-1 OS=Homo sapiens GN=PRKAA1 PE=1 SV=4 - [AAPK1_HUMAN]	90.38	6.44	1	3	3	5	559	63.9686	8.11865
Q8TCT9	Minor histocompatibility antigen H13 OS=Homo sapiens GN=HM13 PE=1 SV=1 - [HM13_HUMAN]	90.36	9.02	1	2	2	3	377	41.4616	6.43018
P62244	40S ribosomal protein S15a OS=Homo sapiens GN=RPS15A PE=1 SV=2 - [RS15A_HUMAN]	89.9982	22.31	1	3	3	4	130	14.83	10.1255
Q71UM5	40S ribosomal protein S27-like OS=Homo sapiens GN=RPS27L PE=1 SV=3 - [RS27L_HUMAN]	89.99	28.57	1	1	2	3	84	9.47087	9.45166
O14907	Tax1-binding protein 3 OS=Homo sapiens GN=TAX1BP3 PE=1 SV=2 - [TX1B3_HUMAN]	89.86	13.71	1	1	1	1	124	13.7261	8.48486
Q9BZG1	Ras-related protein Rab-34 OS=Homo sapiens GN=RAB34 PE=1 SV=1 - [RAB34_HUMAN]	89.77	5.79	1	1	1	2	259	29.0259	7.88428
Q9NX76	CKLF-like MARVEL transmembrane domain-containing protein 6 OS=Homo sapiens GN=CMTM6 PE=1 SV=1 - [CKLF6_HUMAN]	89.51	10.38	1	1	1	1	183	20.4055	5.2876
Q9H4E5	Rho-related GTP-binding protein RhoJ OS=Homo sapiens GN=RHOJ PE=1 SV=1 - [RHOJ_HUMAN]	89.5	6.54	1	1	1	2	214	23.8048	6.82959
Q9NR31	GTP-binding protein SAR1a OS=Homo sapiens GN=SAR1A PE=1 SV=1 - [SAR1A_HUMAN]	89.02	21.72	1	2	2	2	198	22.3525	6.68311
Q15334	Lethal(2) giant larvae protein homolog 1 OS=Homo sapiens GN=LLGL1 PE=1 SV=3 - [L2GL1_HUMAN]	88.7366	2.26	1	2	2	4	1064	115.346	6.29053
Q15139	Serine/threonine-protein kinase D1 OS=Homo sapiens GN=PRKD1 PE=1 SV=2 - [KPCD1_HUMAN]	88.72	1.54	1	1	1	2	912	101.639	6.62451
O75886	Signal transducing adapter molecule 2 OS=Homo sapiens GN=STAM2 PE=1 SV=1 - [STAM2_HUMAN]	88.71	4.76	1	1	1	1	525	58.1277	5.07178
P55011	Solute carrier family 12 member 2 OS=Homo sapiens GN=SLC12A2 PE=1 SV=1 - [S12A2_HUMAN]	88.685	3.63	1	3	4	6	1212	131.364	6.40479
P52788	Spermine synthase OS=Homo sapiens GN=SMS PE=1 SV=2 - [SPSY_HUMAN]	88.4667	7.65	1	2	2	3	366	41.2418	5.021
Q6IAA8	Ragulator complex protein LAMTOR1 OS=Homo sapiens GN=LAMTOR1 PE=1 SV=2 - [LTOR1_HUMAN]	88.26	8.07	1	1	1	2	161	17.7338	5.14795
P63173	60S ribosomal protein L38 OS=Homo sapiens GN=RPL38 PE=1 SV=2 - [RL38_HUMAN]	88.22	41.43	1	3	3	5	70	8.21273	10.0962
P40123	Adenylyl cyclase-associated protein 2 OS=Homo sapiens GN=CAP2 PE=1 SV=1 - [CAP2_HUMAN]	88.2031	4.4	1	2	2	3	477	52.7908	6.3667
P04233	HLA class II histocompatibility antigen gamma chain OS=Homo sapiens GN=CD74 PE=1 SV=3 - [HG2A_HUMAN]	88.0183	4.05	1	2	2	5	296	33.4937	8.44092
P55036	26S proteasome non-ATPase regulatory subunit 4 OS=Homo sapiens GN=PSMD4 PE=1 SV=1 - [PSMD4_HUMAN]	87.46	7.16	2	2	2	3	377	40.7112	4.79248
Q9UKS6	Protein kinase C and casein kinase substrate in neurons protein 3 OS=Homo sapiens GN=PACSIN3 PE=1 SV=2 - [PACN3_HUMAN]	86.53	6.13	1	2	2	2	424	48.4568	6.17627
Q5VYK3	Proteasome-associated protein ECM29 homolog OS=Homo sapiens GN=ECM29 PE=1 SV=2 - [ECM29_HUMAN]	86.23	0.87	1	1	1	2	1845	204.16	7.12256
P18433	Receptor-type tyrosine-protein phosphatase alpha OS=Homo sapiens OX=9606 GN=PTPRA PE=1 SV=3 - [PTPRA_HUMAN]	86.1067	3.99	4	3	3	3	802	90.6615	6.65381
Q9Y316	Protein MEMO1 OS=Homo sapiens GN=MEMO1 PE=1 SV=1 - [MEMO1_HUMAN]	85.91	5.72	1	1	1	3	297	33.7115	7.13721
Q13620	Cullin-4B OS=Homo sapiens GN=CUL4B PE=1 SV=4 - [CUL4B_HUMAN]	85.73	2.41	2	2	2	4	913	103.916	7.37158
P62899	60S ribosomal protein L31 OS=Homo sapiens GN=RPL31 PE=1 SV=1 - [RL31_HUMAN]	85.69	13.6	1	2	2	4	125	14.4539	10.5356
Q8IXU6	Solute carrier family 35 member F2 OS=Homo sapiens GN=SLC35F2 PE=1 SV=1 - [S35F2_HUMAN]	85.61	7.49	1	1	1	2	374	41.1848	6.21436
Q02413	Desmoglein-1 OS=Homo sapiens GN=DSG1 PE=1 SV=2 - [DSG1_HUMAN]	85.6	4.19	1	3	3	4	1049	113.676	5.03369
P04920	Anion exchange protein 2 OS=Homo sapiens GN=SLC4A2 PE=1 SV=4 - [B3A2_HUMAN]	85.4314	2.18	2	3	3	4	1241	136.923	6.29053
P60983	Glia maturation factor beta OS=Homo sapiens GN=GMFB PE=1 SV=2 - [GMFB_HUMAN]	85.43	17.61	2	2	2	3	142	16.7025	5.2876
P13674	Prolyl 4-hydroxylase subunit alpha-1 OS=Homo sapiens GN=P4HA1 PE=1 SV=2 - [P4HA1_HUMAN]	85.33	8.8	1	3	3	4	534	61.011	6.01123
O14745	Na(+)/H(+) exchange regulatory cofactor NHE-RF1 OS=Homo sapiens GN=SLC9A3R1 PE=1 SV=4 - [NHRF1_HUMAN]	85.24	11.73	1	3	3	3	358	38.8446	5.77002
Q9HAV4	Exportin-5 OS=Homo sapiens GN=XPO5 PE=1 SV=1 - [XPO5_HUMAN]	85.22	0.83	1	1	1	2	1204	136.222	5.79541
Q9C0B1	Alpha-ketoglutarate-dependent dioxygenase FTO OS=Homo sapiens GN=FTO PE=1 SV=3 - [FTO_HUMAN]	85.15	3.76	1	1	1	2	505	58.2449	5.22412
O60749	Sorting nexin-2 OS=Homo sapiens GN=SNX2 PE=1 SV=2 - [SNX2_HUMAN]	84.9679	2.12	1	1	1	2	519	58.4347	5.12256
Q9UN86	Ras GTPase-activating protein-binding protein 2 OS=Homo sapiens GN=G3BP2 PE=1 SV=2 - [G3BP2_HUMAN]	84.64	11	1	2	3	3	482	54.0878	5.5542
P61923	Coatomer subunit zeta-1 OS=Homo sapiens GN=COPZ1 PE=1 SV=1 - [COPZ1_HUMAN]	84.08	7.91	1	1	1	2	177	20.1855	4.80518
P39687	Acidic leucine-rich nuclear phosphoprotein 32 family member A OS=Homo sapiens GN=ANP32A PE=1 SV=1 - [AN32A_HUMAN]	83.8433	8.84	2	2	2	3	249	28.5683	4.09424
Q96KN1	Protein FAM84B OS=Homo sapiens GN=FAM84B PE=1 SV=1 - [FA84B_HUMAN]	83.3467	11.61	1	2	2	3	310	34.4531	5.5415
P20036	HLA class II histocompatibility antigen, DP alpha 1 chain OS=Homo sapiens GN=HLA-DPA1 PE=1 SV=1 - [DPA1_HUMAN]	83.33	17.69	1	3	3	5	260	29.3619	5.21143
Q16563	Synaptophysin-like protein 1 OS=Homo sapiens GN=SYPL1 PE=1 SV=1 - [SYPL1_HUMAN]	83.08	19.69	1	3	3	4	259	28.5467	8.42627
Q9NRN5	Olfactomedin-like protein 3 OS=Homo sapiens GN=OLFML3 PE=2 SV=1 - [OLFL3_HUMAN]	82.85	9.36	1	3	3	5	406	45.9813	6.56592
Q9H299	SH3 domain-binding glutamic acid-rich-like protein 3 OS=Homo sapiens GN=SH3BGRL3 PE=1 SV=1 - [SH3L3_HUMAN]	82.69	16.13	1	1	1	1	93	10.4313	4.93213
Q9NRV9	Heme-binding protein 1 OS=Homo sapiens GN=HEBP1 PE=1 SV=1 - [HEBP1_HUMAN]	82.4567	29.1	1	3	3	3	189	21.0835	5.79541
P11169	Solute carrier family 2, facilitated glucose transporter member 3 OS=Homo sapiens GN=SLC2A3 PE=1 SV=1 - [GTR3_HUMAN]	82.2799	3.02	2	1	2	4	496	53.8893	7.1958
P25189	Myelin protein P0 OS=Homo sapiens GN=MPZ PE=1 SV=1 - [MYP0_HUMAN]	82.2619	8.87	1	2	2	4	248	27.5375	9.53955
Q9Y3A5	Ribosome maturation protein SBDS OS=Homo sapiens GN=SBDS PE=1 SV=4 - [SBDS_HUMAN]	81.6397	20.8	1	6	6	8	250	28.7453	8.74854
Q14108	Lysosome membrane protein 2 OS=Homo sapiens GN=SCARB2 PE=1 SV=2 - [SCRB2_HUMAN]	81.6089	3.77	9	2	2	3	478	54.2555	5.13525
Q04206	Transcription factor p65 OS=Homo sapiens GN=RELA PE=1 SV=2 - [TF65_HUMAN]	81.588	8.17	1	2	2	3	551	60.1814	5.68115
P01008	Antithrombin-III OS=Homo sapiens GN=SERPINC1 PE=1 SV=1 - [ANT3_HUMAN]	81.56	4.53	1	1	1	1	464	52.5689	6.7124
P47712	Cytosolic phospholipase A2 OS=Homo sapiens GN=PLA2G4A PE=1 SV=2 - [PA24A_HUMAN]	81.48	5.21	1	2	2	2	749	85.1842	5.37646
Q9Y2H2	Phosphatidylinositide phosphatase SAC2 OS=Homo sapiens GN=INPP5F PE=1 SV=3 - [SAC2_HUMAN]	81.23	1.06	1	1	1	2	1132	128.326	7.02002
P14324	Farnesyl pyrophosphate synthase OS=Homo sapiens GN=FDPS PE=1 SV=4 - [FPPS_HUMAN]	81.0524	11.69	1	4	4	6	419	48.2446	6.15088
Q9UI12	V-type proton ATPase subunit H OS=Homo sapiens GN=ATP6V1H PE=1 SV=1 - [VATH_HUMAN]	80.9	4.76	1	1	1	1	483	55.8471	6.48096
Q7KYR7	Butyrophilin subfamily 2 member A1 OS=Homo sapiens GN=BTN2A1 PE=1 SV=3 - [BT2A1_HUMAN]	80.44	2.28	1	1	1	2	527	59.5945	6.48096
Q9Y2A7	Nck-associated protein 1 OS=Homo sapiens GN=NCKAP1 PE=1 SV=1 - [NCKP1_HUMAN]	80.3267	5.05	1	4	4	4	1128	128.707	6.62451
Q9NQW7	Xaa-Pro aminopeptidase 1 OS=Homo sapiens GN=XPNPEP1 PE=1 SV=3 - [XPP1_HUMAN]	79.69	2.57	1	1	1	2	623	69.8732	5.66846
O14763	Tumor necrosis factor receptor superfamily member 10B OS=Homo sapiens GN=TNFRSF10B PE=1 SV=2 - [TR10B_HUMAN]	79.3067	7.27	1	2	2	3	440	47.8477	5.5542
Q15785	Mitochondrial import receptor subunit TOM34 OS=Homo sapiens GN=TOMM34 PE=1 SV=2 - [TOM34_HUMAN]	79.11	4.85	1	1	1	1	309	34.5378	8.98291
Q9NZW5	MAGUK p55 subfamily member 6 OS=Homo sapiens GN=MPP6 PE=1 SV=2 - [MPP6_HUMAN]	78.7667	7.96	2	3	3	3	540	61.0788	6.17627
Q14847	LIM and SH3 domain protein 1 OS=Homo sapiens GN=LASP1 PE=1 SV=2 - [LASP1_HUMAN]	78.59	5.36	1	1	1	1	261	29.6982	7.04932
Q13277	Syntaxin-3 OS=Homo sapiens GN=STX3 PE=1 SV=3 - [STX3_HUMAN]	78.49	9	1	2	2	2	289	33.1344	5.43994
O43813	LanC-like protein 1 OS=Homo sapiens GN=LANCL1 PE=1 SV=1 - [LANC1_HUMAN]	78.47	4.76	1	2	2	3	399	45.2536	7.75244
P07099	Epoxide hydrolase 1 OS=Homo sapiens GN=EPHX1 PE=1 SV=1 - [HYEP_HUMAN]	78.47	3.08	1	1	1	2	455	52.915	7.25439
O60888	Protein CutA OS=Homo sapiens GN=CUTA PE=1 SV=2 - [CUTA_HUMAN]	78.2372	14.53	1	2	2	3	179	19.1041	5.50342
P84103	Serine/arginine-rich splicing factor 3 OS=Homo sapiens GN=SRSF3 PE=1 SV=1 - [SRSF3_HUMAN]	78.1467	14.02	2	2	2	3	164	19.3179	11.6489
Q9UHY7	Enolase-phosphatase E1 OS=Homo sapiens GN=ENOPH1 PE=1 SV=1 - [ENOPH_HUMAN]	77.85	13.03	1	2	2	2	261	28.9145	4.77979
P30085	UMP-CMP kinase OS=Homo sapiens GN=CMPK1 PE=1 SV=3 - [KCY_HUMAN]	77.41	7.65	1	1	1	1	196	22.2083	5.56689
O60841	Eukaryotic translation initiation factor 5B OS=Homo sapiens GN=EIF5B PE=1 SV=4 - [IF2P_HUMAN]	77.3	2.54	1	2	2	2	1220	138.742	5.49072
P55268	Laminin subunit beta-2 OS=Homo sapiens GN=LAMB2 PE=1 SV=2 - [LAMB2_HUMAN]	77.1246	2.89	1	3	3	4	1798	195.854	6.52197
Q9BUL8	Programmed cell death protein 10 OS=Homo sapiens GN=PDCD10 PE=1 SV=1 - [PDC10_HUMAN]	77.12	22.64	1	3	3	3	212	24.6858	8.19189
Q9NT62	Ubiquitin-like-conjugating enzyme ATG3 OS=Homo sapiens GN=ATG3 PE=1 SV=1 - [ATG3_HUMAN]	77.08	4.14	1	1	1	1	314	35.8415	4.7417
P22695	Cytochrome b-c1 complex subunit 2, mitochondrial OS=Homo sapiens GN=UQCRC2 PE=1 SV=3 - [QCR2_HUMAN]	77.06	3.53	1	1	1	1	453	48.4129	8.63135
Q00535	Cyclin-dependent kinase 5 OS=Homo sapiens GN=CDK5 PE=1 SV=3 - [CDK5_HUMAN]	76.3967	13.01	21	2	3	4	292	33.2832	7.66455
O95084	Serine protease 23 OS=Homo sapiens GN=PRSS23 PE=1 SV=1 - [PRS23_HUMAN]	76.248	8.62	1	2	2	2	383	42.9738	9.42236
Q8N1B4	Vacuolar protein sorting-associated protein 52 homolog OS=Homo sapiens GN=VPS52 PE=1 SV=1 - [VPS52_HUMAN]	76.24	3.73	1	1	1	2	723	82.1696	5.98584
Q9UGI8	Testin OS=Homo sapiens GN=TES PE=1 SV=1 - [TES_HUMAN]	76.2033	9.74	1	3	3	3	421	47.9639	7.6792
Q99798	Aconitate hydratase, mitochondrial OS=Homo sapiens GN=ACO2 PE=1 SV=2 - [ACON_HUMAN]	76.16	2.05	1	1	1	1	780	85.3719	7.60596
O00391	Sulfhydryl oxidase 1 OS=Homo sapiens GN=QSOX1 PE=1 SV=3 - [QSOX1_HUMAN]	76.1543	3.08	1	2	2	3	747	82.5255	8.92432
Q9BSD7	Cancer-related nucleoside-triphosphatase OS=Homo sapiens GN=NTPCR PE=1 SV=1 - [NTPCR_HUMAN]	76.0739	10.53	1	1	1	2	190	20.7001	9.53955
O15484	Calpain-5 OS=Homo sapiens GN=CAPN5 PE=1 SV=2 - [CAN5_HUMAN]	75.56	6.09	1	3	3	4	640	73.1227	7.63525
P31483	Nucleolysin TIA-1 isoform p40 OS=Homo sapiens GN=TIA1 PE=1 SV=3 - [TIA1_HUMAN]	75.49	4.66	1	1	1	1	386	42.9356	7.73779
Q8TD55	Pleckstrin homology domain-containing family O member 2 OS=Homo sapiens GN=PLEKHO2 PE=1 SV=1 - [PKHO2_HUMAN]	75.34	4.69	1	1	1	1	490	53.3171	5.42725
P52294	Importin subunit alpha-1 OS=Homo sapiens GN=KPNA1 PE=1 SV=3 - [IMA1_HUMAN]	75.2733	6.13	1	1	2	3	538	60.1836	5.0083
Q9BPX3	Condensin complex subunit 3 OS=Homo sapiens GN=NCAPG PE=1 SV=1 - [CND3_HUMAN]	75.24	1.38	1	1	1	1	1015	114.262	5.59229
O95394	Phosphoacetylglucosamine mutase OS=Homo sapiens GN=PGM3 PE=1 SV=1 - [AGM1_HUMAN]	74.9167	4.98	1	2	2	3	542	59.8143	6.25244
O43747	AP-1 complex subunit gamma-1 OS=Homo sapiens GN=AP1G1 PE=1 SV=5 - [AP1G1_HUMAN]	74.53	2.92	1	1	1	2	822	91.2931	6.80029
P23919	Thymidylate kinase OS=Homo sapiens GN=DTYMK PE=1 SV=4 - [KTHY_HUMAN]	74.49	10.38	1	2	2	4	212	23.8045	8.26514
Q92747	Actin-related protein 2/3 complex subunit 1A OS=Homo sapiens GN=ARPC1A PE=1 SV=2 - [ARC1A_HUMAN]	74.3407	8.92	1	1	2	2	370	41.5427	8.17725
Q6PIU2	Neutral cholesterol ester hydrolase 1 OS=Homo sapiens GN=NCEH1 PE=1 SV=3 - [NCEH1_HUMAN]	74.1	3.92	1	1	1	1	408	45.7787	7.2251
Q9UPY5	Cystine/glutamate transporter OS=Homo sapiens GN=SLC7A11 PE=1 SV=1 - [XCT_HUMAN]	74.09	2.2	1	1	1	3	501	55.3869	9.18799
O94905	Erlin-2 OS=Homo sapiens GN=ERLIN2 PE=1 SV=1 - [ERLN2_HUMAN]	74.08	3.54	2	1	1	2	339	37.8155	5.61768
Q14802	FXYD domain-containing ion transport regulator 3 OS=Homo sapiens GN=FXYD3 PE=2 SV=1 - [FXYD3_HUMAN]	74.05	21.84	1	1	1	4	87	9.25667	7.29834
Q6FI81	Anamorsin OS=Homo sapiens GN=CIAPIN1 PE=1 SV=2 - [CPIN1_HUMAN]	73.9877	4.81	1	1	1	2	312	33.5611	5.61768
O75390	Citrate synthase, mitochondrial OS=Homo sapiens GN=CS PE=1 SV=2 - [CISY_HUMAN]	73.8867	4.29	1	2	2	3	466	51.6795	8.32373
Q8NI35	InaD-like protein OS=Homo sapiens GN=INADL PE=1 SV=3 - [INADL_HUMAN]	73.806	0.33	1	1	1	2	1801	196.247	4.94482
Q86YZ3	Hornerin OS=Homo sapiens GN=HRNR PE=1 SV=2 - [HORN_HUMAN]	73.74	3.37	1	2	2	2	2850	282.228	10.0376
Q99436	Proteasome subunit beta type-7 OS=Homo sapiens GN=PSMB7 PE=1 SV=1 - [PSB7_HUMAN]	73.6984	18.77	1	4	4	6	277	29.9462	7.6792
P17936	Insulin-like growth factor-binding protein 3 OS=Homo sapiens GN=IGFBP3 PE=1 SV=2 - [IBP3_HUMAN]	73.6895	9.62	1	2	2	4	291	31.6537	8.68994
P51178	1-phosphatidylinositol-4,5-bisphosphate phosphodiesterase delta-1 OS=Homo sapiens GN=PLCD1 PE=1 SV=2 - [PLCD1_HUMAN]	73.3	1.98	1	1	1	1	756	85.611	6.69775
P41567	Eukaryotic translation initiation factor 1 OS=Homo sapiens GN=EIF1 PE=1 SV=1 - [EIF1_HUMAN]	73.22	29.2	2	2	2	2	113	12.7246	7.44482
Q15818	Neuronal pentraxin-1 OS=Homo sapiens GN=NPTX1 PE=2 SV=2 - [NPTX1_HUMAN]	73.18	2.55	1	1	1	1	432	47.0928	6.55127
Q13185	Chromobox protein homolog 3 OS=Homo sapiens GN=CBX3 PE=1 SV=4 - [CBX3_HUMAN]	73.11	15.85	2	2	2	2	183	20.7984	5.32568
P48163	NADP-dependent malic enzyme OS=Homo sapiens GN=ME1 PE=1 SV=1 - [MAOX_HUMAN]	72.89	3.67	1	1	1	1	572	64.1091	6.12549
O15162	Phospholipid scramblase 1 OS=Homo sapiens GN=PLSCR1 PE=1 SV=1 - [PLS1_HUMAN]	72.52	6.29	1	1	1	1	318	35.0259	4.94482
P59768	Guanine nucleotide-binding protein G(I)/G(S)/G(O) subunit gamma-2 OS=Homo sapiens GN=GNG2 PE=1 SV=2 - [GBG2_HUMAN]	72.3533	42.25	1	2	2	3	71	7.84503	7.98682
Q92882	Osteoclast-stimulating factor 1 OS=Homo sapiens GN=OSTF1 PE=1 SV=2 - [OSTF1_HUMAN]	72.27	10.28	1	2	2	6	214	23.7719	5.68115
O76094	Signal recognition particle 72 kDa protein OS=Homo sapiens GN=SRP72 PE=1 SV=3 - [SRP72_HUMAN]	72.17	5.96	1	2	2	2	671	74.56	9.26123
P20290	Transcription factor BTF3 OS=Homo sapiens GN=BTF3 PE=1 SV=1 - [BTF3_HUMAN]	71.94	12.14	1	1	1	1	206	22.1544	9.37842
P04004	Vitronectin OS=Homo sapiens GN=VTN PE=1 SV=1 - [VTNC_HUMAN]	71.82	3.14	1	1	1	2	478	54.2712	5.79541
Q8IWB7	WD repeat and FYVE domain-containing protein 1 OS=Homo sapiens GN=WDFY1 PE=1 SV=1 - [WDFY1_HUMAN]	71.7	6.34	1	2	2	3	410	46.2933	7.32764
P30040	Endoplasmic reticulum resident protein 29 OS=Homo sapiens GN=ERP29 PE=1 SV=4 - [ERP29_HUMAN]	71.54	10.34	1	2	2	2	261	28.9752	7.31299
Q08722	Leukocyte surface antigen CD47 OS=Homo sapiens GN=CD47 PE=1 SV=1 - [CD47_HUMAN]	71.5237	5.88	1	2	2	3	323	35.1907	7.21045
Q9ULH0	Kinase D-interacting substrate of 220 kDa OS=Homo sapiens GN=KIDINS220 PE=1 SV=3 - [KDIS_HUMAN]	71.51	1.19	1	1	1	2	1771	196.419	6.62451
Q16674	Melanoma-derived growth regulatory protein OS=Homo sapiens GN=MIA PE=1 SV=1 - [MIA_HUMAN]	71.4759	12.21	1	2	2	3	131	14.4994	8.79248
P27701	CD82 antigen OS=Homo sapiens GN=CD82 PE=1 SV=1 - [CD82_HUMAN]	71.34	4.49	1	1	1	1	267	29.6058	5.23682
Q9C0H2	Protein tweety homolog 3 OS=Homo sapiens GN=TTYH3 PE=1 SV=3 - [TTYH3_HUMAN]	71.18	2.68	1	1	1	1	523	57.5079	5.38916
Q6P2Q9	Pre-mRNA-processing-splicing factor 8 OS=Homo sapiens GN=PRPF8 PE=1 SV=2 - [PRP8_HUMAN]	70.98	0.86	1	1	1	1	2335	273.427	8.83643
P46108	Adapter molecule crk OS=Homo sapiens GN=CRK PE=1 SV=2 - [CRK_HUMAN]	70.92	9.21	1	2	2	2	304	33.81	5.5542
Q15043	Zinc transporter ZIP14 OS=Homo sapiens GN=SLC39A14 PE=1 SV=3 - [S39AE_HUMAN]	70.84	2.64	1	1	1	1	492	54.1772	5.32568
P52434	DNA-directed RNA polymerases I, II, and III subunit RPABC3 OS=Homo sapiens GN=POLR2H PE=1 SV=4 - [RPAB3_HUMAN]	70.29	8	1	1	1	2	150	17.1324	4.67822
Q96CS3	FAS-associated factor 2 OS=Homo sapiens GN=FAF2 PE=1 SV=2 - [FAF2_HUMAN]	70.16	6.52	1	1	1	1	445	52.5905	5.61768
Q8IZ83	Aldehyde dehydrogenase family 16 member A1 OS=Homo sapiens GN=ALDH16A1 PE=1 SV=2 - [A16A1_HUMAN]	70.03	2	1	1	1	1	802	85.0737	6.78564
P50552	Vasodilator-stimulated phosphoprotein OS=Homo sapiens GN=VASP PE=1 SV=3 - [VASP_HUMAN]	69.76	4.21	1	1	1	1	380	39.8051	8.93896
O95183	Vesicle-associated membrane protein 5 OS=Homo sapiens GN=VAMP5 PE=1 SV=1 - [VAMP5_HUMAN]	69.7	11.21	1	1	1	1	116	12.7967	7.85498
Q9UQE7	Structural maintenance of chromosomes protein 3 OS=Homo sapiens GN=SMC3 PE=1 SV=2 - [SMC3_HUMAN]	69.657	1.89	1	1	2	2	1217	141.454	7.18115
P60201	Myelin proteolipid protein OS=Homo sapiens GN=PLP1 PE=1 SV=2 - [MYPR_HUMAN]	69.6	4.69	1	1	1	1	277	30.0571	8.35303
O43396	Thioredoxin-like protein 1 OS=Homo sapiens GN=TXNL1 PE=1 SV=3 - [TXNL1_HUMAN]	69.48	15.57	1	2	2	3	289	32.2307	4.95752
Q9Y5K5	Ubiquitin carboxyl-terminal hydrolase isozyme L5 OS=Homo sapiens GN=UCHL5 PE=1 SV=3 - [UCHL5_HUMAN]	69.44	2.43	1	1	1	2	329	37.583	5.32568
P62877	E3 ubiquitin-protein ligase RBX1 OS=Homo sapiens GN=RBX1 PE=1 SV=1 - [RBX1_HUMAN]	69.22	17.59	1	1	1	1	108	12.2657	6.96143
P49959	Double-strand break repair protein MRE11A OS=Homo sapiens GN=MRE11A PE=1 SV=3 - [MRE11_HUMAN]	69.04	1.84	1	1	1	2	708	80.5433	5.89697
Q8N8S7	Protein enabled homolog OS=Homo sapiens GN=ENAH PE=1 SV=2 - [ENAH_HUMAN]	68.64	3.89	1	2	2	5	591	66.4699	6.93213
P37235	Hippocalcin-like protein 1 OS=Homo sapiens GN=HPCAL1 PE=1 SV=3 - [HPCL1_HUMAN]	68.58	9.33	3	2	2	3	193	22.299	5.35107
P53004	Biliverdin reductase A OS=Homo sapiens GN=BLVRA PE=1 SV=2 - [BIEA_HUMAN]	68.53	3.38	1	1	1	2	296	33.4073	6.44287
Q9BS26	Endoplasmic reticulum resident protein 44 OS=Homo sapiens GN=ERP44 PE=1 SV=1 - [ERP44_HUMAN]	68.068	4.19	1	1	2	3	406	46.9414	5.26221
P53041	Serine/threonine-protein phosphatase 5 OS=Homo sapiens GN=PPP5C PE=1 SV=1 - [PPP5_HUMAN]	68.06	6.21	1	2	2	2	499	56.8423	6.27783
P54819	Adenylate kinase 2, mitochondrial OS=Homo sapiens GN=AK2 PE=1 SV=2 - [KAD2_HUMAN]	67.9019	15.9	1	3	3	3	239	26.4608	7.81104
Q02750	Dual specificity mitogen-activated protein kinase kinase 1 OS=Homo sapiens GN=MAP2K1 PE=1 SV=2 - [MP2K1_HUMAN]	67.75	7.38	1	2	3	5	393	43.4113	6.62451
O00429	Dynamin-1-like protein OS=Homo sapiens GN=DNM1L PE=1 SV=2 - [DNM1L_HUMAN]	67.6767	6.52	1	3	3	3	736	81.8261	6.81494
Q9P0J7	E3 ubiquitin-protein ligase KCMF1 OS=Homo sapiens GN=KCMF1 PE=1 SV=2 - [KCMF1_HUMAN]	67.66	4.46	1	1	1	1	381	41.9189	5.65576
P36915	Guanine nucleotide-binding protein-like 1 OS=Homo sapiens GN=GNL1 PE=1 SV=2 - [GNL1_HUMAN]	67.48	2.97	1	1	1	1	607	68.6185	5.79541
Q9Y315	Putative deoxyribose-phosphate aldolase OS=Homo sapiens GN=DERA PE=1 SV=2 - [DEOC_HUMAN]	67.04	3.77	1	1	1	1	318	35.2085	8.93896
Q9C0D5	Protein TANC1 OS=Homo sapiens GN=TANC1 PE=1 SV=3 - [TANC1_HUMAN]	67.03	2.1	1	2	2	2	1861	202.093	8.32373
Q7Z5G4	Golgin subfamily A member 7 OS=Homo sapiens GN=GOLGA7 PE=1 SV=2 - [GOGA7_HUMAN]	67.01	18.25	1	2	2	3	137	15.814	7.04932
Q5VW32	BRO1 domain-containing protein BROX OS=Homo sapiens GN=BROX PE=1 SV=1 - [BROX_HUMAN]	66.93	8.52	1	2	2	5	411	46.4467	7.6499
Q96ER3	Protein SAAL1 OS=Homo sapiens GN=SAAL1 PE=1 SV=2 - [SAAL1_HUMAN]	66.7	2.32	1	1	1	2	474	53.5237	4.50049
Q9Y394	Dehydrogenase/reductase SDR family member 7 OS=Homo sapiens GN=DHRS7 PE=1 SV=1 - [DHRS7_HUMAN]	66.68	5.9	1	1	1	2	339	38.2741	8.32373
Q92614	Unconventional myosin-XVIIIa OS=Homo sapiens GN=MYO18A PE=1 SV=3 - [MY18A_HUMAN]	66.52	1.36	1	2	2	2	2054	232.971	6.30322
Q9Y613	FH1/FH2 domain-containing protein 1 OS=Homo sapiens GN=FHOD1 PE=1 SV=3 - [FHOD1_HUMAN]	66.3395	2.06	1	2	2	2	1164	126.473	6.39209
O96019	Actin-like protein 6A OS=Homo sapiens GN=ACTL6A PE=1 SV=1 - [ACL6A_HUMAN]	66.29	5.36	1	1	1	1	429	47.4303	5.60498
P26368	Splicing factor U2AF 65 kDa subunit OS=Homo sapiens GN=U2AF2 PE=1 SV=4 - [U2AF2_HUMAN]	66.2811	5.47	1	2	2	2	475	53.4672	9.08545
Q9UNN5	FAS-associated factor 1 OS=Homo sapiens GN=FAF1 PE=1 SV=2 - [FAF1_HUMAN]	66.25	2	1	1	1	2	650	73.9076	4.88135
O43684	Mitotic checkpoint protein BUB3 OS=Homo sapiens GN=BUB3 PE=1 SV=1 - [BUB3_HUMAN]	65.99	8.23	1	2	2	2	328	37.1312	6.84424
Q96KB5	Lymphokine-activated killer T-cell-originated protein kinase OS=Homo sapiens GN=PBK PE=1 SV=3 - [TOPK_HUMAN]	65.69	7.45	1	2	2	3	322	36.062	5.12256
Q9HBA0	Transient receptor potential cation channel subfamily V member 4 OS=Homo sapiens GN=TRPV4 PE=1 SV=2 - [TRPV4_HUMAN]	65.6133	4.13	1	2	2	3	871	98.2184	7.76709
O60884	DnaJ homolog subfamily A member 2 OS=Homo sapiens GN=DNAJA2 PE=1 SV=1 - [DNJA2_HUMAN]	65.2338	8.01	1	2	2	2	412	45.7166	6.48096
Q9NYB9	Abl interactor 2 OS=Homo sapiens GN=ABI2 PE=1 SV=1 - [ABI2_HUMAN]	65.23	2.92	1	1	1	1	513	55.6287	6.16357
Q96CG8	Collagen triple helix repeat-containing protein 1 OS=Homo sapiens GN=CTHRC1 PE=1 SV=1 - [CTHR1_HUMAN]	65.2164	3.29	1	1	1	2	243	26.2071	7.98682
Q15813	Tubulin-specific chaperone E OS=Homo sapiens GN=TBCE PE=1 SV=1 - [TBCE_HUMAN]	65.05	1.9	1	1	1	3	527	59.309	6.75635
Q9BQ67	Glutamate-rich WD repeat-containing protein 1 OS=Homo sapiens GN=GRWD1 PE=1 SV=1 - [GRWD1_HUMAN]	64.95	3.59	1	1	1	1	446	49.3882	4.91943
Q9C0D9	Ethanolaminephosphotransferase 1 OS=Homo sapiens GN=EPT1 PE=1 SV=3 - [EPT1_HUMAN]	64.72	4.03	1	1	1	1	397	45.2002	6.59521
Q15404	Ras suppressor protein 1 OS=Homo sapiens GN=RSU1 PE=1 SV=3 - [RSU1_HUMAN]	64.4873	9.39	1	2	2	3	277	31.5207	8.646
Q96G03	Phosphoglucomutase-2 OS=Homo sapiens GN=PGM2 PE=1 SV=4 - [PGM2_HUMAN]	64.38	5.07	1	3	3	4	612	68.2404	6.72705
Q53GQ0	Very-long-chain 3-oxoacyl-CoA reductase OS=Homo sapiens GN=HSD17B12 PE=1 SV=2 - [DHB12_HUMAN]	64.3667	9.29	1	2	2	3	312	34.3022	9.31982
Q08257	Quinone oxidoreductase OS=Homo sapiens GN=CRYZ PE=1 SV=1 - [QOR_HUMAN]	64.33	5.17	1	1	1	1	329	35.1845	8.44092
Q9NXR7	BRCA1-A complex subunit BRE OS=Homo sapiens GN=BRE PE=1 SV=2 - [BRE_HUMAN]	64.14	3.66	1	1	1	1	383	43.5238	5.80811
P08240	Signal recognition particle receptor subunit alpha OS=Homo sapiens GN=SRPR PE=1 SV=2 - [SRPR_HUMAN]	64.08	3.76	1	2	2	2	638	69.7672	8.95361
Q15942	Zyxin OS=Homo sapiens GN=ZYX PE=1 SV=1 - [ZYX_HUMAN]	63.93	2.62	1	1	1	1	572	61.2382	6.66846
Q99615	DnaJ homolog subfamily C member 7 OS=Homo sapiens GN=DNAJC7 PE=1 SV=2 - [DNJC7_HUMAN]	62.96	4.86	1	1	1	1	494	56.4047	6.96143
Q9BVQ7	Spermatogenesis-associated protein 5-like protein 1 OS=Homo sapiens GN=SPATA5L1 PE=1 SV=2 - [SPA5L_HUMAN]	62.93	2.52	1	1	1	1	753	80.6599	8.08936
P35626	Beta-adrenergic receptor kinase 2 OS=Homo sapiens GN=ADRBK2 PE=2 SV=2 - [ARBK2_HUMAN]	62.8167	2.62	2	1	1	3	688	79.6583	7.62061
Q14166	Tubulin--tyrosine ligase-like protein 12 OS=Homo sapiens GN=TTLL12 PE=1 SV=2 - [TTL12_HUMAN]	62.77	3.11	1	1	1	1	644	74.356	5.52881
P06703	Protein S100-A6 OS=Homo sapiens GN=S100A6 PE=1 SV=1 - [S10A6_HUMAN]	62.69	18.89	1	1	1	1	90	10.1733	5.47803
Q07955	Serine/arginine-rich splicing factor 1 OS=Homo sapiens GN=SRSF1 PE=1 SV=2 - [SRSF1_HUMAN]	62.64	9.68	1	2	2	2	248	27.7278	10.3599
P35813	Protein phosphatase 1A OS=Homo sapiens GN=PPM1A PE=1 SV=1 - [PPM1A_HUMAN]	62.46	3.14	2	1	1	1	382	42.4207	5.36377
Q9UNZ2	NSFL1 cofactor p47 OS=Homo sapiens GN=NSFL1C PE=1 SV=2 - [NSF1C_HUMAN]	62.44	4.32	1	1	1	1	370	40.5483	5.09717
O43592	Exportin-T OS=Homo sapiens GN=XPOT PE=1 SV=2 - [XPOT_HUMAN]	62.39	3.43	1	2	2	2	962	109.893	5.38916
O15357	Phosphatidylinositol-3,4,5-trisphosphate 5-phosphatase 2 OS=Homo sapiens GN=INPPL1 PE=1 SV=2 - [SHIP2_HUMAN]	62.3133	1.35	9	1	2	2	1258	138.513	6.53662
Q03426	Mevalonate kinase OS=Homo sapiens GN=MVK PE=1 SV=1 - [KIME_HUMAN]	62.3033	3.28	1	1	1	3	396	42.4243	6.45557
P68402	Platelet-activating factor acetylhydrolase IB subunit beta OS=Homo sapiens GN=PAFAH1B2 PE=1 SV=1 - [PA1B2_HUMAN]	62.21	8.3	1	1	1	1	229	25.5531	5.92236
Q53H76	Phospholipase A1 member A OS=Homo sapiens GN=PLA1A PE=2 SV=2 - [PLA1A_HUMAN]	62.15	4.82	1	1	1	1	456	49.6834	7.37158
Q96L14	Cep170-like protein OS=Homo sapiens GN=CEP170P1 PE=5 SV=2 - [C170L_HUMAN]	62.12	6.14	2	1	1	1	293	32.6285	5.69385
Q9H2M9	Rab3 GTPase-activating protein non-catalytic subunit OS=Homo sapiens GN=RAB3GAP2 PE=1 SV=1 - [RBGPR_HUMAN]	61.99	1.51	1	2	2	2	1393	155.886	5.61768
P43243	Matrin-3 OS=Homo sapiens GN=MATR3 PE=1 SV=2 - [MATR3_HUMAN]	61.8	2.95	1	1	1	1	847	94.5648	6.25244
Q9Y5K8	V-type proton ATPase subunit D OS=Homo sapiens GN=ATP6V1D PE=1 SV=1 - [VATD_HUMAN]	61.67	6.48	1	1	1	1	247	28.2453	9.36377
P02788	Lactotransferrin OS=Homo sapiens GN=LTF PE=1 SV=6 - [TRFL_HUMAN]	61.5815	1.97	5	1	2	4	710	78.1319	8.11865
Q99439	Calponin-2 OS=Homo sapiens GN=CNN2 PE=1 SV=4 - [CNN2_HUMAN]	61.491	9.06	1	2	2	2	309	33.6753	7.32764
P49321	Nuclear autoantigenic sperm protein OS=Homo sapiens GN=NASP PE=1 SV=2 - [NASP_HUMAN]	61.4793	4.57	1	3	3	4	788	85.1861	4.29736
Q9Y5Y2	Cytosolic Fe-S cluster assembly factor NUBP2 OS=Homo sapiens GN=NUBP2 PE=1 SV=1 - [NUBP2_HUMAN]	61.36	19.56	1	2	2	3	271	28.8068	5.8335
Q96T58	Msx2-interacting protein OS=Homo sapiens GN=SPEN PE=1 SV=1 - [MINT_HUMAN]	61.0952	0.27	1	1	1	2	3664	402.004	7.63525
Q9NXV2	BTB/POZ domain-containing protein KCTD5 OS=Homo sapiens GN=KCTD5 PE=1 SV=1 - [KCTD5_HUMAN]	60.8367	15.81	1	2	2	3	234	26.0761	6.23975
P09960	Leukotriene A-4 hydrolase OS=Homo sapiens GN=LTA4H PE=1 SV=2 - [LKHA4_HUMAN]	60.54	2.13	1	1	1	1	611	69.2412	6.17627
O95376	E3 ubiquitin-protein ligase ARIH2 OS=Homo sapiens GN=ARIH2 PE=1 SV=1 - [ARI2_HUMAN]	60.37	3.25	1	1	1	1	493	57.7811	5.63037
P78527	DNA-dependent protein kinase catalytic subunit OS=Homo sapiens GN=PRKDC PE=1 SV=3 - [PRKDC_HUMAN]	60.22	0.24	1	1	1	3	4128	468.788	7.12256
Q9H267	Vacuolar protein sorting-associated protein 33B OS=Homo sapiens GN=VPS33B PE=1 SV=2 - [VP33B_HUMAN]	60.18	3.08	1	1	1	1	617	70.5404	6.7124
P35249	Replication factor C subunit 4 OS=Homo sapiens GN=RFC4 PE=1 SV=2 - [RFC4_HUMAN]	60.11	5.51	1	1	1	1	363	39.6569	8.01611
Q96C86	Scavenger mRNA-decapping enzyme DcpS OS=Homo sapiens GN=DCPS PE=1 SV=2 - [DCPS_HUMAN]	59.98	8.9	1	2	2	2	337	38.585	6.37939
Q9BTT6	Leucine-rich repeat-containing protein 1 OS=Homo sapiens GN=LRRC1 PE=1 SV=1 - [LRRC1_HUMAN]	59.92	8.21	1	1	2	2	524	59.2049	5.021
P37108	Signal recognition particle 14 kDa protein OS=Homo sapiens GN=SRP14 PE=1 SV=2 - [SRP14_HUMAN]	59.85	10.29	1	1	1	1	136	14.5608	10.0376
Q9ULC4	Malignant T-cell-amplified sequence 1 OS=Homo sapiens GN=MCTS1 PE=1 SV=1 - [MCTS1_HUMAN]	59.84	20.44	1	2	2	2	181	20.5418	8.82178
O75821	Eukaryotic translation initiation factor 3 subunit G OS=Homo sapiens GN=EIF3G PE=1 SV=2 - [EIF3G_HUMAN]	59.8032	9.06	1	2	2	2	320	35.5889	6.12549
Q96J02	E3 ubiquitin-protein ligase Itchy homolog OS=Homo sapiens GN=ITCH PE=1 SV=2 - [ITCH_HUMAN]	59.7121	5.32	2	3	3	3	903	102.738	6.30322
Q8NB37	Parkinson disease 7 domain-containing protein 1 OS=Homo sapiens GN=PDDC1 PE=1 SV=1 - [PDDC1_HUMAN]	59.69	4.55	1	1	1	1	220	23.2826	6.60986
Q9Y450	HBS1-like protein OS=Homo sapiens GN=HBS1L PE=1 SV=1 - [HBS1L_HUMAN]	59.68	6.29	1	2	2	2	684	75.4256	6.60986
Q96QR8	Transcriptional activator protein Pur-beta OS=Homo sapiens GN=PURB PE=1 SV=3 - [PURB_HUMAN]	59.58	9.94	1	1	1	1	312	33.2205	5.42725
P33993	DNA replication licensing factor MCM7 OS=Homo sapiens GN=MCM7 PE=1 SV=4 - [MCM7_HUMAN]	59.43	1.81	1	1	1	2	719	81.2566	6.45557
P56199	Integrin alpha-1 OS=Homo sapiens GN=ITGA1 PE=1 SV=2 - [ITA1_HUMAN]	59.2	2.29	1	2	2	2	1179	130.765	6.29053
P08174	Complement decay-accelerating factor OS=Homo sapiens GN=CD55 PE=1 SV=4 - [DAF_HUMAN]	59.15	5.25	1	2	2	3	381	41.3736	7.59131
P04040	Catalase OS=Homo sapiens GN=CAT PE=1 SV=3 - [CATA_HUMAN]	59.11	3.61	1	1	1	1	527	59.7188	7.38623
Q9Y3D6	Mitochondrial fission 1 protein OS=Homo sapiens GN=FIS1 PE=1 SV=2 - [FIS1_HUMAN]	59	10.53	1	1	1	1	152	16.927	8.79248
Q53TN4	Cytochrome b reductase 1 OS=Homo sapiens GN=CYBRD1 PE=1 SV=1 - [CYBR1_HUMAN]	58.99	3.5	1	1	1	1	286	31.6207	8.76318
P48509	CD151 antigen OS=Homo sapiens GN=CD151 PE=1 SV=3 - [CD151_HUMAN]	58.8733	7.51	1	2	2	3	253	28.2763	7.47412
Q13459	Unconventional myosin-IXb OS=Homo sapiens GN=MYO9B PE=1 SV=3 - [MYO9B_HUMAN]	58.86	0.93	1	1	1	2	2157	243.249	8.74854
O60701	UDP-glucose 6-dehydrogenase OS=Homo sapiens GN=UGDH PE=1 SV=1 - [UGDH_HUMAN]	58.77	4.45	1	2	2	2	494	54.9893	7.12256
Q9H4L5	Oxysterol-binding protein-related protein 3 OS=Homo sapiens GN=OSBPL3 PE=1 SV=1 - [OSBL3_HUMAN]	58.73	2.71	1	2	2	2	887	101.16	6.87354
P12270	Nucleoprotein TPR OS=Homo sapiens GN=TPR PE=1 SV=3 - [TPR_HUMAN]	58.71	0.42	1	1	1	1	2363	267.131	5.021
P26012	Integrin beta-8 OS=Homo sapiens GN=ITGB8 PE=1 SV=1 - [ITB8_HUMAN]	58.69	2.21	1	1	1	1	769	85.5754	7.25439
P30566	Adenylosuccinate lyase OS=Homo sapiens GN=ADSL PE=1 SV=2 - [PUR8_HUMAN]	58.6543	7.23	1	2	2	4	484	54.854	7.10791
Q96A72	Protein mago nashi homolog 2 OS=Homo sapiens GN=MAGOHB PE=1 SV=1 - [MGN2_HUMAN]	58.3	6.08	1	1	1	1	148	17.2649	6.39209
P54760	Ephrin type-B receptor 4 OS=Homo sapiens GN=EPHB4 PE=1 SV=2 - [EPHB4_HUMAN]	58.1936	2.53	2	2	2	2	987	108.201	6.90283
P31323	cAMP-dependent protein kinase type II-beta regulatory subunit OS=Homo sapiens GN=PRKAR2B PE=1 SV=3 - [KAP3_HUMAN]	58.1379	7.18	1	1	2	3	418	46.2729	4.91943
Q5T4S7	E3 ubiquitin-protein ligase UBR4 OS=Homo sapiens GN=UBR4 PE=1 SV=1 - [UBR4_HUMAN]	58.1126	0.68	1	2	2	2	5183	573.476	6.03662
Q9NP72	Ras-related protein Rab-18 OS=Homo sapiens GN=RAB18 PE=1 SV=1 - [RAB18_HUMAN]	58.1	8.74	1	2	2	3	206	22.9626	5.23682
P10586	Receptor-type tyrosine-protein phosphatase F OS=Homo sapiens GN=PTPRF PE=1 SV=2 - [PTPRF_HUMAN]	58.04	0.73	1	1	1	1	1907	212.744	6.30322
O60313	Dynamin-like 120 kDa protein, mitochondrial OS=Homo sapiens GN=OPA1 PE=1 SV=3 - [OPA1_HUMAN]	58	1.67	1	1	1	1	960	111.561	7.86963
Q6UVY6	DBH-like monooxygenase protein 1 OS=Homo sapiens GN=MOXD1 PE=1 SV=1 - [MOXD1_HUMAN]	57.7633	4.24	1	2	2	3	613	69.6077	6.43018
Q96A65	Exocyst complex component 4 OS=Homo sapiens GN=EXOC4 PE=1 SV=1 - [EXOC4_HUMAN]	57.5919	3.8	1	3	3	3	974	110.429	6.49365
P02042	Hemoglobin subunit delta OS=Homo sapiens GN=HBD PE=1 SV=2 - [HBD_HUMAN]	57.5	12.93	5	2	2	2	147	16.0453	8.04541
Q4KMP7	TBC1 domain family member 10B OS=Homo sapiens GN=TBC1D10B PE=1 SV=3 - [TB10B_HUMAN]	57.47	1.61	1	1	1	1	808	87.1447	9.18799
Q9Y653	G-protein coupled receptor 56 OS=Homo sapiens GN=GPR56 PE=1 SV=2 - [GPR56_HUMAN]	57.0157	4.91	1	2	2	2	693	77.6882	8.48486
P61619	Protein transport protein Sec61 subunit alpha isoform 1 OS=Homo sapiens GN=SEC61A1 PE=1 SV=2 - [S61A1_HUMAN]	56.97	5.25	2	1	1	1	476	52.2305	8.06006
Q08623	Pseudouridine-5'-monophosphatase OS=Homo sapiens GN=HDHD1 PE=1 SV=3 - [HDHD1_HUMAN]	56.72	7.89	1	1	1	1	228	25.2329	5.31299
P49770	Translation initiation factor eIF-2B subunit beta OS=Homo sapiens GN=EIF2B2 PE=1 SV=3 - [EI2BB_HUMAN]	56.65	4.56	1	1	1	1	351	38.9649	6.16357
P55058	Phospholipid transfer protein OS=Homo sapiens GN=PLTP PE=1 SV=1 - [PLTP_HUMAN]	56.6	3.04	1	1	1	1	493	54.7045	7.00537
Q9HCJ1	Progressive ankylosis protein homolog OS=Homo sapiens GN=ANKH PE=1 SV=2 - [ANKH_HUMAN]	56.57	4.27	1	1	1	1	492	54.2054	7.88428
P42892	Endothelin-converting enzyme 1 OS=Homo sapiens GN=ECE1 PE=1 SV=2 - [ECE1_HUMAN]	56.06	2.21	1	1	1	1	770	87.1082	5.88428
Q9Y243	RAC-gamma serine/threonine-protein kinase OS=Homo sapiens GN=AKT3 PE=1 SV=1 - [AKT3_HUMAN]	56.05	5.22	3	2	2	2	479	55.7388	6.02393
Q5VIR6	Vacuolar protein sorting-associated protein 53 homolog OS=Homo sapiens GN=VPS53 PE=1 SV=1 - [VPS53_HUMAN]	55.94	3.43	1	1	1	1	699	79.602	6.02393
Q14689	Disco-interacting protein 2 homolog A OS=Homo sapiens GN=DIP2A PE=1 SV=2 - [DIP2A_HUMAN]	55.8533	1.59	2	1	2	3	1571	170.261	8.03076
P61088	Ubiquitin-conjugating enzyme E2 N OS=Homo sapiens GN=UBE2N PE=1 SV=1 - [UBE2N_HUMAN]	55.66	34.21	2	4	4	6	152	17.127	6.56592
Q99572	P2X purinoceptor 7 OS=Homo sapiens GN=P2RX7 PE=1 SV=4 - [P2RX7_HUMAN]	55.47	5.71	1	3	3	4	595	68.5401	8.19189
P98196	Probable phospholipid-transporting ATPase IH OS=Homo sapiens GN=ATP11A PE=2 SV=3 - [AT11A_HUMAN]	55.3933	2.82	1	2	2	3	1134	129.672	6.59521
O15400	Syntaxin-7 OS=Homo sapiens GN=STX7 PE=1 SV=4 - [STX7_HUMAN]	55.28	4.98	1	1	1	2	261	29.7973	5.5542
O75531	Barrier-to-autointegration factor OS=Homo sapiens GN=BANF1 PE=1 SV=1 - [BAF_HUMAN]	55.27	26.97	1	1	1	2	89	10.052	6.0874
Q96L93	Kinesin-like protein KIF16B OS=Homo sapiens GN=KIF16B PE=1 SV=2 - [KI16B_HUMAN]	55.1667	3.42	7	2	3	3	1317	151.918	6.16357
P32970	CD70 antigen OS=Homo sapiens GN=CD70 PE=1 SV=2 - [CD70_HUMAN]	55.07	7.25	1	1	1	1	193	21.1049	8.52881
B2RPK0	Putative high mobility group protein B1-like 1 OS=Homo sapiens GN=HMGB1P1 PE=5 SV=1 - [HGB1A_HUMAN]	54.71	6.16	2	1	1	2	211	24.2228	6.21436
Q8TBX8	Phosphatidylinositol-5-phosphate 4-kinase type-2 gamma OS=Homo sapiens GN=PIP4K2C PE=1 SV=3 - [PI42C_HUMAN]	54.65	4.04	1	1	1	1	421	47.2701	6.84424
Q8IUW5	RELT-like protein 1 OS=Homo sapiens GN=RELL1 PE=1 SV=1 - [RELL1_HUMAN]	54.64	5.9	1	1	1	2	271	29.3219	8.33838
Q68DA7	Formin-1 OS=Homo sapiens GN=FMN1 PE=1 SV=3 - [FMN1_HUMAN]	54.5	0.92	1	1	1	1	1419	157.48	8.44092
P15374	Ubiquitin carboxyl-terminal hydrolase isozyme L3 OS=Homo sapiens GN=UCHL3 PE=1 SV=1 - [UCHL3_HUMAN]	54.38	8.7	1	1	1	2	230	26.166	4.91943
P40616	ADP-ribosylation factor-like protein 1 OS=Homo sapiens GN=ARL1 PE=1 SV=1 - [ARL1_HUMAN]	54.31	4.97	1	1	1	1	181	20.4044	5.71924
Q14444	Caprin-1 OS=Homo sapiens GN=CAPRIN1 PE=1 SV=2 - [CAPR1_HUMAN]	54.29	7.62	1	2	2	2	709	78.318	5.24951
Q9NTJ5	Phosphatidylinositide phosphatase SAC1 OS=Homo sapiens GN=SACM1L PE=1 SV=2 - [SAC1_HUMAN]	54.27	3.07	1	2	2	3	587	66.924	7.12256
Q96D46	60S ribosomal export protein NMD3 OS=Homo sapiens GN=NMD3 PE=1 SV=1 - [NMD3_HUMAN]	54.09	3.38	1	1	1	1	503	57.5659	7.13721
Q92900	Regulator of nonsense transcripts 1 OS=Homo sapiens GN=UPF1 PE=1 SV=2 - [RENT1_HUMAN]	53.92	1.24	1	1	1	1	1129	124.267	6.60986
Q13573	SNW domain-containing protein 1 OS=Homo sapiens GN=SNW1 PE=1 SV=1 - [SNW1_HUMAN]	53.77	4.1	1	1	1	1	536	61.4565	9.5249
Q9H9H4	Vacuolar protein sorting-associated protein 37B OS=Homo sapiens GN=VPS37B PE=1 SV=1 - [VP37B_HUMAN]	53.71	6.32	1	1	1	1	285	31.2875	7.34229
Q9Y6I3	Epsin-1 OS=Homo sapiens GN=EPN1 PE=1 SV=2 - [EPN1_HUMAN]	53.59	2.08	2	1	1	2	576	60.2557	4.83057
P52735	Guanine nucleotide exchange factor VAV2 OS=Homo sapiens GN=VAV2 PE=1 SV=2 - [VAV2_HUMAN]	52.6333	5.24	1	3	3	3	878	101.224	7.07861
P57737	Coronin-7 OS=Homo sapiens GN=CORO7 PE=1 SV=2 - [CORO7_HUMAN]	52.36	2.49	1	2	2	2	925	100.542	5.79541
Q9NTJ3	Structural maintenance of chromosomes protein 4 OS=Homo sapiens GN=SMC4 PE=1 SV=2 - [SMC4_HUMAN]	52.12	1.4	1	2	2	2	1288	147.091	6.78564
O14979	Heterogeneous nuclear ribonucleoprotein D-like OS=Homo sapiens GN=HNRPDL PE=1 SV=3 - [HNRDL_HUMAN]	52.05	6.43	1	1	2	3	420	46.4091	9.56885
P20340	Ras-related protein Rab-6A OS=Homo sapiens GN=RAB6A PE=1 SV=3 - [RAB6A_HUMAN]	51.86	9.62	1	2	2	4	208	23.5779	5.5415
Q9H0X4	Protein ITFG3 OS=Homo sapiens GN=ITFG3 PE=1 SV=1 - [ITFG3_HUMAN]	51.7	3.08	1	1	1	1	552	59.6221	6.27783
P42285	Superkiller viralicidic activity 2-like 2 OS=Homo sapiens GN=SKIV2L2 PE=1 SV=3 - [SK2L2_HUMAN]	51.6845	2.69	5	1	2	2	1042	117.729	6.52197
Q9P2G1	Ankyrin repeat and IBR domain-containing protein 1 OS=Homo sapiens GN=ANKIB1 PE=1 SV=3 - [AKIB1_HUMAN]	51.5	2.11	1	1	1	2	1089	121.924	5.10986
P78344	Eukaryotic translation initiation factor 4 gamma 2 OS=Homo sapiens GN=EIF4G2 PE=1 SV=1 - [IF4G2_HUMAN]	51.3849	2.32	1	2	2	2	907	102.297	7.13721
Q15382	GTP-binding protein Rheb OS=Homo sapiens GN=RHEB PE=1 SV=1 - [RHEB_HUMAN]	51.26	8.7	1	1	1	1	184	20.4845	5.92236
P62316	Small nuclear ribonucleoprotein Sm D2 OS=Homo sapiens GN=SNRPD2 PE=1 SV=1 - [SMD2_HUMAN]	51.22	16.1	1	1	1	1	118	13.5182	9.90576
Q9Y4P1	Cysteine protease ATG4B OS=Homo sapiens GN=ATG4B PE=1 SV=2 - [ATG4B_HUMAN]	51.18	3.05	1	1	1	1	393	44.2657	5.07178
Q9UQN3	Charged multivesicular body protein 2b OS=Homo sapiens GN=CHMP2B PE=1 SV=1 - [CHM2B_HUMAN]	51.16	4.69	1	1	1	1	213	23.8912	8.76318
P48745	CCN family member 3 OS=Homo sapiens OX=9606 GN=CCN3 PE=1 SV=1 - [CCN3_HUMAN]	51.08	4.76	1	1	1	1	357	39.1355	7.72314
Q16537	Serine/threonine-protein phosphatase 2A 56 kDa regulatory subunit epsilon isoform OS=Homo sapiens GN=PPP2R5E PE=1 SV=1 - [2A5E_HUMAN]	50.85	6	1	2	2	3	467	54.6645	6.94678
Q9NUJ1	Abhydrolase domain-containing protein 10, mitochondrial OS=Homo sapiens GN=ABHD10 PE=1 SV=1 - [ABHDA_HUMAN]	50.84	5.23	1	1	1	1	306	33.9107	8.57275
Q9UBV8	Peflin OS=Homo sapiens GN=PEF1 PE=1 SV=1 - [PEF1_HUMAN]	50.81	4.58	1	1	1	1	284	30.3613	6.53662
Q08945	FACT complex subunit SSRP1 OS=Homo sapiens GN=SSRP1 PE=1 SV=1 - [SSRP1_HUMAN]	50.79	1.97	1	1	1	1	709	81.0244	6.87354
P14543	Nidogen-1 OS=Homo sapiens GN=NID1 PE=1 SV=3 - [NID1_HUMAN]	50.7567	1.84	1	2	2	3	1247	136.291	5.2876
O15372	Eukaryotic translation initiation factor 3 subunit H OS=Homo sapiens GN=EIF3H PE=1 SV=1 - [EIF3H_HUMAN]	50.7033	10.23	1	3	3	4	352	39.9051	6.53662
Q8WV24	Pleckstrin homology-like domain family A member 1 OS=Homo sapiens GN=PHLDA1 PE=1 SV=4 - [PHLA1_HUMAN]	50.6	5.24	1	2	2	2	401	44.9881	9.89111
Q9BTW9	Tubulin-specific chaperone D OS=Homo sapiens GN=TBCD PE=1 SV=2 - [TBCD_HUMAN]	50.51	6.8	1	3	3	3	1192	132.515	6.18896
Q9NQ88	Fructose-2,6-bisphosphatase TIGAR OS=Homo sapiens GN=TIGAR PE=1 SV=1 - [TIGAR_HUMAN]	50.48	12.96	1	2	2	2	270	30.0431	7.69385
Q9Y6D5	Brefeldin A-inhibited guanine nucleotide-exchange protein 2 OS=Homo sapiens GN=ARFGEF2 PE=1 SV=3 - [BIG2_HUMAN]	50.4233	1.68	1	2	2	2	1785	201.909	6.32861
Q96IJ6	Mannose-1-phosphate guanyltransferase alpha OS=Homo sapiens GN=GMPPA PE=1 SV=1 - [GMPPA_HUMAN]	50.36	2.38	1	1	1	1	420	46.2621	7.21045
P46976	Glycogenin-1 OS=Homo sapiens GN=GYG1 PE=1 SV=4 - [GLYG_HUMAN]	50.16	4.57	1	1	1	1	350	39.3586	5.52881
O95777	N-alpha-acetyltransferase 38, NatC auxiliary subunit OS=Homo sapiens GN=NAA38 PE=1 SV=3 - [NAA38_HUMAN]	50	16.67	1	1	1	1	96	10.3963	4.4751
Q96B97	SH3 domain-containing kinase-binding protein 1 OS=Homo sapiens GN=SH3KBP1 PE=1 SV=2 - [SH3K1_HUMAN]	49.98	1.95	1	1	1	4	665	73.0817	6.62451
Q5T5C0	Syntaxin-binding protein 5 OS=Homo sapiens GN=STXBP5 PE=1 SV=1 - [STXB5_HUMAN]	49.41	1.22	1	1	1	1	1151	127.492	7.28369
P18077	60S ribosomal protein L35a OS=Homo sapiens GN=RPL35A PE=1 SV=2 - [RL35A_HUMAN]	49.3132	21.82	1	3	3	4	110	12.5298	11.063
P53992	Protein transport protein Sec24C OS=Homo sapiens GN=SEC24C PE=1 SV=3 - [SC24C_HUMAN]	49.29	1.19	1	1	1	1	1094	118.249	7.06396
Q9HB07	UPF0160 protein MYG1, mitochondrial OS=Homo sapiens GN=C12orf10 PE=1 SV=2 - [MYG1_HUMAN]	49.14	2.66	1	1	1	1	376	42.4224	6.66846
P15151	Poliovirus receptor OS=Homo sapiens GN=PVR PE=1 SV=2 - [PVR_HUMAN]	49.11	5.28	1	1	1	1	417	45.2738	6.52197
Q16527	Cysteine and glycine-rich protein 2 OS=Homo sapiens GN=CSRP2 PE=1 SV=3 - [CSRP2_HUMAN]	49.06	16.06	1	2	2	2	193	20.9399	8.6167
P12081	Histidine--tRNA ligase, cytoplasmic OS=Homo sapiens GN=HARS PE=1 SV=2 - [SYHC_HUMAN]	49.04	5.89	1	2	2	2	509	57.3742	5.88428
P04921	Glycophorin-C OS=Homo sapiens GN=GYPC PE=1 SV=1 - [GLPC_HUMAN]	48.7	20.31	1	1	1	1	128	13.8017	4.84326
Q99698	Lysosomal-trafficking regulator OS=Homo sapiens GN=LYST PE=1 SV=3 - [LYST_HUMAN]	48.66	0.29	1	1	1	1	3801	428.866	6.60986
Q13469	Nuclear factor of activated T-cells, cytoplasmic 2 OS=Homo sapiens GN=NFATC2 PE=1 SV=2 - [NFAC2_HUMAN]	48.3541	2.59	1	2	2	3	925	100.083	7.28369
P27695	DNA-(apurinic or apyrimidinic site) lyase OS=Homo sapiens GN=APEX1 PE=1 SV=2 - [APEX1_HUMAN]	48.08	3.46	1	1	1	1	318	35.5322	8.11865
P51570	Galactokinase OS=Homo sapiens GN=GALK1 PE=1 SV=1 - [GALK1_HUMAN]	47.8	2.81	1	1	1	1	392	42.2456	6.45557
P15924	Desmoplakin OS=Homo sapiens GN=DSP PE=1 SV=3 - [DESP_HUMAN]	47.72	0.49	1	1	1	2	2871	331.569	6.81494
P08069	Insulin-like growth factor 1 receptor OS=Homo sapiens GN=IGF1R PE=1 SV=1 - [IGF1R_HUMAN]	47.7	1.32	1	2	2	2	1367	154.693	5.79541
P31942	Heterogeneous nuclear ribonucleoprotein H3 OS=Homo sapiens GN=HNRNPH3 PE=1 SV=2 - [HNRH3_HUMAN]	47.46	4.91	1	1	1	1	346	36.9031	6.87354
Q16610	Extracellular matrix protein 1 OS=Homo sapiens GN=ECM1 PE=1 SV=2 - [ECM1_HUMAN]	47.45	4.63	1	2	2	2	540	60.6353	6.7124
P05089	Arginase-1 OS=Homo sapiens GN=ARG1 PE=1 SV=2 - [ARGI1_HUMAN]	47.43	6.21	1	1	1	1	322	34.7133	7.21045
P46977	Dolichyl-diphosphooligosaccharide--protein glycosyltransferase subunit STT3A OS=Homo sapiens GN=STT3A PE=1 SV=2 - [STT3A_HUMAN]	47.2	0.99	1	1	1	1	705	80.4768	8.07471
O43633	Charged multivesicular body protein 2a OS=Homo sapiens GN=CHMP2A PE=1 SV=1 - [CHM2A_HUMAN]	47.2	8.11	1	1	1	1	222	25.0879	5.97314
Q5W0Z9	Probable palmitoyltransferase ZDHHC20 OS=Homo sapiens GN=ZDHHC20 PE=1 SV=1 - [ZDH20_HUMAN]	47.2	3.01	1	1	1	2	365	42.2499	7.7085
Q2M389	WASH complex subunit 7 OS=Homo sapiens GN=KIAA1033 PE=1 SV=2 - [WASH7_HUMAN]	47.1832	2.13	3	1	2	2	1173	136.316	7.44482
O00267	Transcription elongation factor SPT5 OS=Homo sapiens GN=SUPT5H PE=1 SV=1 - [SPT5H_HUMAN]	47.03	1.75	1	1	1	1	1087	120.925	5.05908
Q9H089	Large subunit GTPase 1 homolog OS=Homo sapiens GN=LSG1 PE=1 SV=2 - [LSG1_HUMAN]	46.79	4.56	1	1	1	1	658	75.1784	6.37939
Q13098	COP9 signalosome complex subunit 1 OS=Homo sapiens GN=GPS1 PE=1 SV=4 - [CSN1_HUMAN]	46.6836	6.72	5	1	2	3	491	55.5012	6.7417
P48047	ATP synthase subunit O, mitochondrial OS=Homo sapiens GN=ATP5O PE=1 SV=1 - [ATPO_HUMAN]	46.17	7.98	1	1	1	1	213	23.2627	9.96436
P26639	Threonine--tRNA ligase, cytoplasmic OS=Homo sapiens GN=TARS PE=1 SV=3 - [SYTC_HUMAN]	46.1306	4.56	1	2	2	2	723	83.3819	6.66846
O95486	Protein transport protein Sec24A OS=Homo sapiens GN=SEC24A PE=1 SV=2 - [SC24A_HUMAN]	46.1	1.37	1	1	1	1	1093	119.674	7.66455
Q96I24	Far upstream element-binding protein 3 OS=Homo sapiens GN=FUBP3 PE=1 SV=2 - [FUBP3_HUMAN]	45.81	2.45	1	1	1	1	572	61.6022	8.38232
Q07157	Tight junction protein ZO-1 OS=Homo sapiens GN=TJP1 PE=1 SV=3 - [ZO1_HUMAN]	45.78	0.69	1	1	1	1	1748	195.34	6.69775
O75190	DnaJ homolog subfamily B member 6 OS=Homo sapiens GN=DNAJB6 PE=1 SV=2 - [DNJB6_HUMAN]	45.74	5.21	1	1	1	1	326	36.0649	9.15869
O75436	Vacuolar protein sorting-associated protein 26A OS=Homo sapiens GN=VPS26A PE=1 SV=2 - [VP26A_HUMAN]	45.7	3.67	1	1	1	2	327	38.1457	6.56592
Q99426	Tubulin-folding cofactor B OS=Homo sapiens GN=TBCB PE=1 SV=2 - [TBCB_HUMAN]	45.53	9.43	1	1	1	1	244	27.3085	5.14795
Q7L5D6	Golgi to ER traffic protein 4 homolog OS=Homo sapiens GN=GET4 PE=1 SV=1 - [GET4_HUMAN]	44.74	4.59	1	1	1	1	327	36.481	5.41455
P51572	B-cell receptor-associated protein 31 OS=Homo sapiens GN=BCAP31 PE=1 SV=3 - [BAP31_HUMAN]	44.55	6.5	1	1	1	2	246	27.974	8.44092
Q68EM7	Rho GTPase-activating protein 17 OS=Homo sapiens GN=ARHGAP17 PE=1 SV=1 - [RHG17_HUMAN]	44.55	2.16	1	1	1	1	881	95.3773	7.62061
O15118	Niemann-Pick C1 protein OS=Homo sapiens GN=NPC1 PE=1 SV=2 - [NPC1_HUMAN]	44.54	0.94	1	1	1	1	1278	142.074	5.36377
P23471	Receptor-type tyrosine-protein phosphatase zeta OS=Homo sapiens GN=PTPRZ1 PE=1 SV=4 - [PTPRZ_HUMAN]	44.3	0.95	1	1	1	2	2315	254.429	4.88135
P81274	G-protein-signaling modulator 2 OS=Homo sapiens GN=GPSM2 PE=1 SV=3 - [GPSM2_HUMAN]	44.16	3.36	1	1	1	2	684	76.6142	6.39209
P24666	Low molecular weight phosphotyrosine protein phosphatase OS=Homo sapiens GN=ACP1 PE=1 SV=3 - [PPAC_HUMAN]	44.12	5.7	1	1	1	1	158	18.0308	6.7417
O43143	Putative pre-mRNA-splicing factor ATP-dependent RNA helicase DHX15 OS=Homo sapiens GN=DHX15 PE=1 SV=2 - [DHX15_HUMAN]	44.05	2.52	1	2	2	2	795	90.8752	7.45947
P40763	Signal transducer and activator of transcription 3 OS=Homo sapiens GN=STAT3 PE=1 SV=2 - [STAT3_HUMAN]	44.02	2.73	1	1	1	2	770	88.0114	6.30322
P18065	Insulin-like growth factor-binding protein 2 OS=Homo sapiens GN=IGFBP2 PE=1 SV=2 - [IBP2_HUMAN]	43.87	4.62	1	2	2	2	325	34.7912	7.50342
O60678	Protein arginine N-methyltransferase 3 OS=Homo sapiens OX=9606 GN=PRMT3 PE=1 SV=4 - [ANM3_HUMAN]	43.72	2.64	1	1	1	1	531	59.8648	5.35107
Q9BXJ9	N-alpha-acetyltransferase 15, NatA auxiliary subunit OS=Homo sapiens GN=NAA15 PE=1 SV=1 - [NAA15_HUMAN]	43.63	2.19	1	2	2	2	866	101.208	7.41553
P00491	Purine nucleoside phosphorylase OS=Homo sapiens GN=PNP PE=1 SV=2 - [PNPH_HUMAN]	43.5659	5.54	2	2	2	2	289	32.0972	6.94678
Q9H1I8	Activating signal cointegrator 1 complex subunit 2 OS=Homo sapiens GN=ASCC2 PE=1 SV=3 - [ASCC2_HUMAN]	43.35	3.43	1	1	1	2	757	86.3063	5.16064
O95302	Peptidyl-prolyl cis-trans isomerase FKBP9 OS=Homo sapiens GN=FKBP9 PE=1 SV=2 - [FKBP9_HUMAN]	43.32	5.09	2	2	2	2	570	63.0435	5.08447
O76071	Probable cytosolic iron-sulfur protein assembly protein CIAO1 OS=Homo sapiens GN=CIAO1 PE=1 SV=1 - [CIAO1_HUMAN]	43.32	2.36	1	1	1	1	339	37.8158	4.97021
Q9Y3B8	Oligoribonuclease, mitochondrial OS=Homo sapiens GN=REXO2 PE=1 SV=3 - [ORN_HUMAN]	43.15	4.22	1	1	1	1	237	26.8156	6.87354
Q9Y5B9	FACT complex subunit SPT16 OS=Homo sapiens GN=SUPT16H PE=1 SV=1 - [SP16H_HUMAN]	43.14	0.96	1	1	1	1	1047	119.838	5.65576
Q13510	Acid ceramidase OS=Homo sapiens GN=ASAH1 PE=1 SV=5 - [ASAH1_HUMAN]	42.91	5.82	1	1	1	1	395	44.6308	7.62061
Q99747	Gamma-soluble NSF attachment protein OS=Homo sapiens GN=NAPG PE=1 SV=1 - [SNAG_HUMAN]	42.73	3.21	1	1	1	1	312	34.7243	5.41455
P04818	Thymidylate synthase OS=Homo sapiens GN=TYMS PE=1 SV=3 - [TYSY_HUMAN]	42.65	3.51	1	1	1	1	313	35.6932	7.00537
Q14738	Serine/threonine-protein phosphatase 2A 56 kDa regulatory subunit delta isoform OS=Homo sapiens GN=PPP2R5D PE=1 SV=1 - [2A5D_HUMAN]	42.46	3.49	1	1	1	1	602	69.9474	8.1333
Q8TCG1	Protein CIP2A OS=Homo sapiens GN=KIAA1524 PE=1 SV=2 - [CIP2A_HUMAN]	42.43	2.98	1	1	1	1	905	102.121	6.22705
Q9UQB8	Brain-specific angiogenesis inhibitor 1-associated protein 2 OS=Homo sapiens GN=BAIAP2 PE=1 SV=1 - [BAIP2_HUMAN]	42.37	2.36	1	1	1	1	552	60.8296	8.89502
Q9UIW2	Plexin-A1 OS=Homo sapiens GN=PLXNA1 PE=1 SV=3 - [PLXA1_HUMAN]	42.36	0.79	1	1	1	1	1896	210.933	6.91748
P49773	Histidine triad nucleotide-binding protein 1 OS=Homo sapiens GN=HINT1 PE=1 SV=2 - [HINT1_HUMAN]	42.26	5.56	1	1	1	1	126	13.7931	6.94678
O14672	Disintegrin and metalloproteinase domain-containing protein 10 OS=Homo sapiens GN=ADAM10 PE=1 SV=1 - [ADA10_HUMAN]	42.0594	2.54	1	2	2	2	748	84.0877	7.76709
Q53HL2	Borealin OS=Homo sapiens GN=CDCA8 PE=1 SV=2 - [BOREA_HUMAN]	41.72	5.36	1	1	1	2	280	31.3038	9.86182
Q13797	Integrin alpha-9 OS=Homo sapiens GN=ITGA9 PE=1 SV=2 - [ITA9_HUMAN]	41.66	2.51	1	1	1	1	1035	114.415	6.13818
Q9BTT0	Acidic leucine-rich nuclear phosphoprotein 32 family member E OS=Homo sapiens GN=ANP32E PE=1 SV=1 - [AN32E_HUMAN]	41.4641	11.19	1	2	2	2	268	30.6738	3.85303
Q9NQ48	Leucine zipper transcription factor-like protein 1 OS=Homo sapiens GN=LZTFL1 PE=1 SV=1 - [LZTL1_HUMAN]	41.26	3.34	1	1	1	1	299	34.5711	5.36377
P48059	LIM and senescent cell antigen-like-containing domain protein 1 OS=Homo sapiens GN=LIMS1 PE=1 SV=4 - [LIMS1_HUMAN]	41.24	4.92	1	1	1	1	325	37.2258	8.04541
O14495	Lipid phosphate phosphohydrolase 3 OS=Homo sapiens GN=PPAP2B PE=1 SV=1 - [LPP3_HUMAN]	40.79	3.54	1	1	1	2	311	35.093	9.14404
Q9H3N1	Thioredoxin-related transmembrane protein 1 OS=Homo sapiens GN=TMX1 PE=1 SV=1 - [TMX1_HUMAN]	40.75	3.21	1	1	1	1	280	31.7708	4.98291
Q9UNS2	COP9 signalosome complex subunit 3 OS=Homo sapiens GN=COPS3 PE=1 SV=3 - [CSN3_HUMAN]	40.71	2.84	1	1	1	1	423	47.842	6.65381
Q14232	Translation initiation factor eIF-2B subunit alpha OS=Homo sapiens GN=EIF2B1 PE=1 SV=1 - [EI2BA_HUMAN]	40.66	6.89	1	2	2	2	305	33.6908	7.32764
P48426	Phosphatidylinositol-5-phosphate 4-kinase type-2 alpha OS=Homo sapiens GN=PIP4K2A PE=1 SV=2 - [PI42A_HUMAN]	40.39	2.22	2	1	1	1	406	46.1955	6.99072
P08559	Pyruvate dehydrogenase E1 component subunit alpha, somatic form, mitochondrial OS=Homo sapiens GN=PDHA1 PE=1 SV=3 - [ODPA_HUMAN]	40.35	3.33	1	1	1	1	390	43.2676	8.06006
Q9Y570	Protein phosphatase methylesterase 1 OS=Homo sapiens GN=PPME1 PE=1 SV=3 - [PPME1_HUMAN]	40.3395	2.33	1	1	1	2	386	42.2882	5.97314
P56377	AP-1 complex subunit sigma-2 OS=Homo sapiens GN=AP1S2 PE=1 SV=1 - [AP1S2_HUMAN]	40.26	5.73	1	1	1	1	157	18.6028	5.46533
Q9UK41	Vacuolar protein sorting-associated protein 28 homolog OS=Homo sapiens GN=VPS28 PE=1 SV=1 - [VPS28_HUMAN]	40.03	11.31	1	1	1	1	221	25.4086	5.5415
P30740	Leukocyte elastase inhibitor OS=Homo sapiens GN=SERPINB1 PE=1 SV=1 - [ILEU_HUMAN]	39.99	2.9	1	1	1	1	379	42.7147	6.27783
P25685	DnaJ homolog subfamily B member 1 OS=Homo sapiens GN=DNAJB1 PE=1 SV=4 - [DNJB1_HUMAN]	39.97	5.29	1	1	1	1	340	38.0204	8.63135
Q9Y5P4	Collagen type IV alpha-3-binding protein OS=Homo sapiens GN=COL4A3BP PE=1 SV=1 - [C43BP_HUMAN]	39.8733	1.44	1	1	1	2	624	70.7907	5.47803
P49207	60S ribosomal protein L34 OS=Homo sapiens GN=RPL34 PE=1 SV=3 - [RL34_HUMAN]	39.8671	12.82	1	2	2	3	117	13.2845	11.4731
Q9UNE7	E3 ubiquitin-protein ligase CHIP OS=Homo sapiens GN=STUB1 PE=1 SV=2 - [CHIP_HUMAN]	39.57	4.95	1	1	1	1	303	34.8342	5.87158
Q8NFZ8	Cell adhesion molecule 4 OS=Homo sapiens GN=CADM4 PE=1 SV=1 - [CADM4_HUMAN]	39.43	2.32	1	1	1	1	388	42.7588	6.30322
Q16775	Hydroxyacylglutathione hydrolase, mitochondrial OS=Homo sapiens GN=HAGH PE=1 SV=2 - [GLO2_HUMAN]	39.35	5.19	1	1	1	2	308	33.7843	8.11865
Q96AY3	Peptidyl-prolyl cis-trans isomerase FKBP10 OS=Homo sapiens GN=FKBP10 PE=1 SV=1 - [FKB10_HUMAN]	39.2433	4.64	1	2	2	3	582	64.2042	5.61768
Q15386	Ubiquitin-protein ligase E3C OS=Homo sapiens GN=UBE3C PE=1 SV=3 - [UBE3C_HUMAN]	39.0967	3.51	1	3	3	3	1083	123.844	6.7124
Q04837	Single-stranded DNA-binding protein, mitochondrial OS=Homo sapiens GN=SSBP1 PE=1 SV=1 - [SSBP_HUMAN]	38.99	12.16	1	1	1	1	148	17.249	9.59814
Q8N4U5	T-complex protein 11-like protein 2 OS=Homo sapiens GN=TCP11L2 PE=2 SV=1 - [T11L2_HUMAN]	38.901	1.16	2	1	1	2	519	58.0545	4.95752
Q9HC38	Glyoxalase domain-containing protein 4 OS=Homo sapiens GN=GLOD4 PE=1 SV=1 - [GLOD4_HUMAN]	38.84	3.19	1	1	1	2	313	34.7713	5.60498
Q86WG5	Myotubularin-related protein 13 OS=Homo sapiens GN=SBF2 PE=1 SV=1 - [MTMRD_HUMAN]	38.82	0.49	2	1	1	1	1849	208.333	7.06396
Q13443	Disintegrin and metalloproteinase domain-containing protein 9 OS=Homo sapiens GN=ADAM9 PE=1 SV=1 - [ADAM9_HUMAN]	38.75	2.93	1	1	1	1	819	90.4971	7.51807
Q15208	Serine/threonine-protein kinase 38 OS=Homo sapiens GN=STK38 PE=1 SV=1 - [STK38_HUMAN]	38.6792	3.23	14	1	2	2	465	54.1554	7.15186
P13804	Electron transfer flavoprotein subunit alpha, mitochondrial OS=Homo sapiens GN=ETFA PE=1 SV=1 - [ETFA_HUMAN]	38.51	8.71	1	2	2	2	333	35.0576	8.38232
Q7Z699	Sprouty-related, EVH1 domain-containing protein 1 OS=Homo sapiens GN=SPRED1 PE=1 SV=2 - [SPRE1_HUMAN]	38.2392	6.08	14	1	2	2	444	50.4442	6.53662
Q7L7X3	Serine/threonine-protein kinase TAO1 OS=Homo sapiens GN=TAOK1 PE=1 SV=1 - [TAOK1_HUMAN]	38.19	1.4	2	2	2	2	1001	115.997	7.6499
O43399	Tumor protein D54 OS=Homo sapiens GN=TPD52L2 PE=1 SV=2 - [TPD54_HUMAN]	38.07	10.19	1	1	1	2	206	22.2243	5.36377
Q8TDX7	Serine/threonine-protein kinase Nek7 OS=Homo sapiens GN=NEK7 PE=1 SV=1 - [NEK7_HUMAN]	38.05	5.3	2	1	1	1	302	34.5284	8.25049
P61604	10 kDa heat shock protein, mitochondrial OS=Homo sapiens GN=HSPE1 PE=1 SV=2 - [CH10_HUMAN]	38	9.8	1	1	1	1	102	10.9249	8.92432
P27449	V-type proton ATPase 16 kDa proteolipid subunit OS=Homo sapiens GN=ATP6V0C PE=1 SV=1 - [VATL_HUMAN]	37.95	11.61	1	1	1	2	155	15.7255	8.44092
Q9Y5L0	Transportin-3 OS=Homo sapiens GN=TNPO3 PE=1 SV=3 - [TNPO3_HUMAN]	37.87	1.08	1	1	1	1	923	104.136	5.56689
O95163	Elongator complex protein 1 OS=Homo sapiens GN=IKBKAP PE=1 SV=3 - [ELP1_HUMAN]	37.82	0.98	1	1	1	1	1332	150.159	5.93506
P00403	Cytochrome c oxidase subunit 2 OS=Homo sapiens GN=MT-CO2 PE=1 SV=1 - [COX2_HUMAN]	37.81	4.41	1	1	1	1	227	25.5482	4.81787
Q13148	TAR DNA-binding protein 43 OS=Homo sapiens GN=TARDBP PE=1 SV=1 - [TADBP_HUMAN]	37.76	2.17	1	1	1	1	414	44.7113	6.18896
P27816	Microtubule-associated protein 4 OS=Homo sapiens GN=MAP4 PE=1 SV=3 - [MAP4_HUMAN]	37.6	3.04	1	2	2	2	1152	120.93	5.42725
P53384	Cytosolic Fe-S cluster assembly factor NUBP1 OS=Homo sapiens GN=NUBP1 PE=1 SV=2 - [NUBP1_HUMAN]	37.37	2.81	1	1	1	1	320	34.5124	5.32568
O75663	TIP41-like protein OS=Homo sapiens GN=TIPRL PE=1 SV=2 - [TIPRL_HUMAN]	37.33	4.41	1	1	1	2	272	31.4237	5.90967
Q9UMX1	Suppressor of fused homolog OS=Homo sapiens GN=SUFU PE=1 SV=2 - [SUFU_HUMAN]	37.27	2.89	1	1	1	1	484	53.913	5.32568
P07108	Acyl-CoA-binding protein OS=Homo sapiens GN=DBI PE=1 SV=2 - [ACBP_HUMAN]	37.24	18.39	1	1	1	1	87	10.038	6.56592
P46109	Crk-like protein OS=Homo sapiens GN=CRKL PE=1 SV=1 - [CRKL_HUMAN]	37.05	5.61	1	1	1	1	303	33.7559	6.7417
O15127	Secretory carrier-associated membrane protein 2 OS=Homo sapiens GN=SCAMP2 PE=1 SV=2 - [SCAM2_HUMAN]	37.04	3.65	1	1	1	1	329	36.6253	6.1001
Q14254	Flotillin-2 OS=Homo sapiens GN=FLOT2 PE=1 SV=2 - [FLOT2_HUMAN]	37.01	2.57	1	1	1	1	428	47.0347	5.24951
O75822	Eukaryotic translation initiation factor 3 subunit J OS=Homo sapiens GN=EIF3J PE=1 SV=2 - [EIF3J_HUMAN]	36.78	4.26	1	1	1	1	258	29.0445	4.83057
Q9BVC6	Transmembrane protein 109 OS=Homo sapiens GN=TMEM109 PE=1 SV=1 - [TM109_HUMAN]	36.62	4.94	1	1	1	2	243	26.1936	10.4771
Q15678	Tyrosine-protein phosphatase non-receptor type 14 OS=Homo sapiens GN=PTPN14 PE=1 SV=2 - [PTN14_HUMAN]	36.62	1.85	1	1	1	1	1187	135.175	8.30908
P84090	Enhancer of rudimentary homolog OS=Homo sapiens GN=ERH PE=1 SV=1 - [ERH_HUMAN]	36.56	10.58	1	1	1	1	104	12.251	5.92236
Q04941	Proteolipid protein 2 OS=Homo sapiens GN=PLP2 PE=1 SV=1 - [PLP2_HUMAN]	36.53	8.55	1	1	1	1	152	16.6797	7.23975
O95197	Reticulon-3 OS=Homo sapiens GN=RTN3 PE=1 SV=2 - [RTN3_HUMAN]	36.34	1.07	1	1	1	1	1032	112.541	4.95752
O60763	General vesicular transport factor p115 OS=Homo sapiens GN=USO1 PE=1 SV=2 - [USO1_HUMAN]	36.28	2.08	1	1	1	1	962	107.828	4.90674
Q03405	Urokinase plasminogen activator surface receptor OS=Homo sapiens GN=PLAUR PE=1 SV=1 - [UPAR_HUMAN]	36.24	11.64	1	2	2	2	335	36.9533	6.65381
P08621	U1 small nuclear ribonucleoprotein 70 kDa OS=Homo sapiens GN=SNRNP70 PE=1 SV=2 - [RU17_HUMAN]	36.18	2.52	1	1	1	1	437	51.5258	9.93506
P04114	Apolipoprotein B-100 OS=Homo sapiens GN=APOB PE=1 SV=2 - [APOB_HUMAN]	36.06	0.57	1	2	2	2	4563	515.283	7.04932
Q7L5N7	Lysophosphatidylcholine acyltransferase 2 OS=Homo sapiens GN=LPCAT2 PE=1 SV=1 - [PCAT2_HUMAN]	36.01	4.23	1	2	2	2	544	60.1694	6.55127
Q9UH65	Switch-associated protein 70 OS=Homo sapiens GN=SWAP70 PE=1 SV=1 - [SWP70_HUMAN]	35.89	1.71	1	1	1	1	585	68.9545	5.87158
Q9ULE4	Protein FAM184B OS=Homo sapiens GN=FAM184B PE=2 SV=3 - [F184B_HUMAN]	35.75	0.94	1	1	1	1	1060	120.969	6.17627
Q15438	Cytohesin-1 OS=Homo sapiens GN=CYTH1 PE=1 SV=1 - [CYH1_HUMAN]	35.68	2.76	3	1	1	1	398	46.3834	5.5415
O00170	AH receptor-interacting protein OS=Homo sapiens GN=AIP PE=1 SV=2 - [AIP_HUMAN]	35.51	7.27	1	2	2	2	330	37.6121	6.29053
Q69YQ0	Cytospin-A OS=Homo sapiens GN=SPECC1L PE=1 SV=2 - [CYTSA_HUMAN]	35.51	0.98	1	1	1	1	1117	124.525	5.71924
Q92945	Far upstream element-binding protein 2 OS=Homo sapiens GN=KHSRP PE=1 SV=4 - [FUBP2_HUMAN]	35.46	1.41	1	1	1	1	711	73.07	7.29834
Q8N1F7	Nuclear pore complex protein Nup93 OS=Homo sapiens GN=NUP93 PE=1 SV=2 - [NUP93_HUMAN]	35.34	3.79	1	1	1	1	819	93.4296	5.71924
P51580	Thiopurine S-methyltransferase OS=Homo sapiens GN=TPMT PE=1 SV=1 - [TPMT_HUMAN]	35.31	5.31	1	1	1	1	245	28.1621	6.22705
P62304	Small nuclear ribonucleoprotein E OS=Homo sapiens GN=SNRPE PE=1 SV=1 - [RUXE_HUMAN]	35.3	25	1	2	2	2	92	10.7966	9.43701
Q9H993	UPF0364 protein C6orf211 OS=Homo sapiens GN=C6orf211 PE=1 SV=1 - [CF211_HUMAN]	35.23	4.76	1	1	1	1	441	51.1399	5.75732
P43487	Ran-specific GTPase-activating protein OS=Homo sapiens GN=RANBP1 PE=1 SV=1 - [RANG_HUMAN]	35.15	5.47	1	1	1	1	201	23.2956	5.2876
O60927	Protein phosphatase 1 regulatory subunit 11 OS=Homo sapiens GN=PPP1R11 PE=1 SV=1 - [PP1RB_HUMAN]	35.07	19.84	1	1	1	1	126	13.9437	7.00537
P20700	Lamin-B1 OS=Homo sapiens GN=LMNB1 PE=1 SV=2 - [LMNB1_HUMAN]	35.04	1.88	1	1	1	1	586	66.3676	5.16064
P53367	Arfaptin-1 OS=Homo sapiens GN=ARFIP1 PE=1 SV=2 - [ARFP1_HUMAN]	34.97	3.22	1	1	1	1	373	41.7126	6.69775
Q5T749	Keratinocyte proline-rich protein OS=Homo sapiens GN=KPRP PE=1 SV=1 - [KPRP_HUMAN]	34.92	1.04	1	1	1	1	579	64.0932	8.26514
O95807	Transmembrane protein 50A OS=Homo sapiens GN=TMEM50A PE=1 SV=1 - [TM50A_HUMAN]	34.68	5.1	1	1	1	1	157	17.3887	5.87158
O95972	Bone morphogenetic protein 15 OS=Homo sapiens GN=BMP15 PE=1 SV=2 - [BMP15_HUMAN]	34.57	1.79	1	1	1	1	392	45.0261	9.11475
P07711	Cathepsin L1 OS=Homo sapiens GN=CTSL PE=1 SV=2 - [CATL1_HUMAN]	34.38	3.6	1	1	1	1	333	37.5397	5.45264
O00533	Neural cell adhesion molecule L1-like protein OS=Homo sapiens GN=CHL1 PE=1 SV=4 - [CHL1_HUMAN]	34.35	1.57	1	1	1	1	1208	134.987	5.75732
Q14993	Collagen alpha-1(XIX) chain OS=Homo sapiens GN=COL19A1 PE=1 SV=3 - [COJA1_HUMAN]	34.28	1.31	1	1	1	1	1142	115.149	8.32373
O94979	Protein transport protein Sec31A OS=Homo sapiens GN=SEC31A PE=1 SV=3 - [SC31A_HUMAN]	33.83	1.31	1	1	2	2	1220	132.931	6.88818
P62273	40S ribosomal protein S29 OS=Homo sapiens GN=RPS29 PE=1 SV=2 - [RS29_HUMAN]	33.82	10.71	1	1	1	1	56	6.6723	10.1255
Q9Y240	C-type lectin domain family 11 member A OS=Homo sapiens GN=CLEC11A PE=1 SV=1 - [CLC11_HUMAN]	33.68	2.79	1	1	1	1	323	35.6725	5.16064
P53680	AP-2 complex subunit sigma OS=Homo sapiens GN=AP2S1 PE=1 SV=2 - [AP2S1_HUMAN]	33.1967	4.93	1	1	1	2	142	17.0067	6.17627
Q07065	Cytoskeleton-associated protein 4 OS=Homo sapiens GN=CKAP4 PE=1 SV=2 - [CKAP4_HUMAN]	33.11	1.16	1	1	1	1	602	65.9827	5.92236
Q9UJ70	N-acetyl-D-glucosamine kinase OS=Homo sapiens GN=NAGK PE=1 SV=4 - [NAGK_HUMAN]	32.98	2.03	1	1	1	1	344	37.3519	6.23975
P51571	Translocon-associated protein subunit delta OS=Homo sapiens GN=SSR4 PE=1 SV=1 - [SSRD_HUMAN]	32.92	10.98	1	1	1	1	173	18.9866	6.15088
P01033	Metalloproteinase inhibitor 1 OS=Homo sapiens GN=TIMP1 PE=1 SV=1 - [TIMP1_HUMAN]	32.75	4.35	1	1	1	1	207	23.1555	8.104
Q9HAC8	Ubiquitin domain-containing protein 1 OS=Homo sapiens GN=UBTD1 PE=1 SV=1 - [UBTD1_HUMAN]	32.72	7.05	1	1	1	1	227	25.9223	7.82568
Q9BX67	Junctional adhesion molecule C OS=Homo sapiens GN=JAM3 PE=1 SV=1 - [JAM3_HUMAN]	32.64	3.23	1	1	1	1	310	34.9978	7.59131
O43252	Bifunctional 3'-phosphoadenosine 5'-phosphosulfate synthase 1 OS=Homo sapiens GN=PAPSS1 PE=1 SV=2 - [PAPS1_HUMAN]	32.32	2.08	1	1	1	1	624	70.7876	6.85889
P09496	Clathrin light chain A OS=Homo sapiens GN=CLTA PE=1 SV=1 - [CLCA_HUMAN]	32.1	2.82	2	1	1	1	248	27.06	4.51318
Q9UP95	Solute carrier family 12 member 4 OS=Homo sapiens GN=SLC12A4 PE=1 SV=2 - [S12A4_HUMAN]	32	1.2	1	1	1	1	1085	120.572	6.44287
Q8N7R7	Cyclin-Y-like protein 1 OS=Homo sapiens GN=CCNYL1 PE=1 SV=2 - [CCYL1_HUMAN]	31.93	3.9	1	1	1	2	359	40.6794	6.07471
P06730	Eukaryotic translation initiation factor 4E OS=Homo sapiens GN=EIF4E PE=1 SV=2 - [IF4E_HUMAN]	31.84	6.45	1	1	1	1	217	25.0815	6.15088
Q9NZD2	Glycolipid transfer protein OS=Homo sapiens GN=GLTP PE=1 SV=3 - [GLTP_HUMAN]	31.52	7.18	1	1	1	1	209	23.8344	7.38623
Q8NCA5	Protein FAM98A OS=Homo sapiens GN=FAM98A PE=1 SV=1 - [FA98A_HUMAN]	31.45	2.31	1	1	1	2	519	55.3663	9.02686
P30048	Thioredoxin-dependent peroxide reductase, mitochondrial OS=Homo sapiens GN=PRDX3 PE=1 SV=3 - [PRDX3_HUMAN]	31.43	4.69	1	1	1	1	256	27.6752	7.78174
Q9UKD2	mRNA turnover protein 4 homolog OS=Homo sapiens GN=MRTO4 PE=1 SV=2 - [MRT4_HUMAN]	31.43	6.28	1	1	1	2	239	27.5429	8.29443
Q9H813	Transmembrane protein 206 OS=Homo sapiens GN=TMEM206 PE=1 SV=1 - [TM206_HUMAN]	31.42	3.14	1	1	1	1	350	40.0177	8.88037
Q10588	ADP-ribosyl cyclase 2 OS=Homo sapiens GN=BST1 PE=1 SV=2 - [BST1_HUMAN]	31.42	1.89	1	1	1	2	318	35.7011	7.79639
Q9BRX8	Redox-regulatory protein FAM213A OS=Homo sapiens GN=FAM213A PE=1 SV=3 - [F213A_HUMAN]	31.41	4.8	1	1	1	1	229	25.7474	8.83643
P61970	Nuclear transport factor 2 OS=Homo sapiens GN=NUTF2 PE=1 SV=1 - [NTF2_HUMAN]	31.3	6.3	1	1	1	2	127	14.469	5.37646
P33316	Deoxyuridine 5'-triphosphate nucleotidohydrolase, mitochondrial OS=Homo sapiens GN=DUT PE=1 SV=4 - [DUT_HUMAN]	31.28	4.76	1	1	1	1	252	26.5466	9.36377
Q86YS7	C2 domain-containing protein 5 OS=Homo sapiens GN=C2CD5 PE=1 SV=1 - [C2CD5_HUMAN]	31.11	0.8	1	1	1	1	1000	110.377	5.69385
O75348	V-type proton ATPase subunit G 1 OS=Homo sapiens GN=ATP6V1G1 PE=1 SV=3 - [VATG1_HUMAN]	30.91	9.32	1	1	1	1	118	13.7491	8.79248
Q13057	Bifunctional coenzyme A synthase OS=Homo sapiens GN=COASY PE=1 SV=4 - [COASY_HUMAN]	30.89	2.66	1	1	1	2	564	62.29	6.99072
Q92890	Ubiquitin fusion degradation protein 1 homolog OS=Homo sapiens GN=UFD1L PE=1 SV=3 - [UFD1_HUMAN]	30.67	5.21	1	1	1	1	307	34.4783	6.69775
P14735	Insulin-degrading enzyme OS=Homo sapiens GN=IDE PE=1 SV=4 - [IDE_HUMAN]	30.56	1.47	1	1	1	1	1019	117.893	6.60986
O14733	Dual specificity mitogen-activated protein kinase kinase 7 OS=Homo sapiens GN=MAP2K7 PE=1 SV=2 - [MP2K7_HUMAN]	30.47	4.3	1	1	1	1	419	47.4545	9.15869
Q12884	Seprase OS=Homo sapiens GN=FAP PE=1 SV=5 - [SEPR_HUMAN]	30.44	1.05	1	1	1	1	760	87.6567	6.65381
O75934	Pre-mRNA-splicing factor SPF27 OS=Homo sapiens GN=BCAS2 PE=1 SV=1 - [SPF27_HUMAN]	30.42	12.44	1	1	1	1	225	26.115	5.65576
Q9HD64	G antigen family D member 2 OS=Homo sapiens GN=XAGE1A PE=2 SV=3 - [GAGD2_HUMAN]	30.39	7.41	2	1	1	1	81	9.07188	9.5835
P01024	Complement C3 OS=Homo sapiens GN=C3 PE=1 SV=2 - [CO3_HUMAN]	30.35	1.2	1	1	1	1	1663	187.03	6.40479
Q96AC1	Fermitin family homolog 2 OS=Homo sapiens GN=FERMT2 PE=1 SV=1 - [FERM2_HUMAN]	30.3	2.79	1	1	1	3	680	77.8106	6.69775
P61086	Ubiquitin-conjugating enzyme E2 K OS=Homo sapiens GN=UBE2K PE=1 SV=3 - [UBE2K_HUMAN]	30.23	13	1	2	2	3	200	22.3926	5.43994
Q15056	Eukaryotic translation initiation factor 4H OS=Homo sapiens GN=EIF4H PE=1 SV=5 - [IF4H_HUMAN]	29.83	5.65	1	1	1	2	248	27.3684	7.2251
P11177	Pyruvate dehydrogenase E1 component subunit beta, mitochondrial OS=Homo sapiens GN=PDHB PE=1 SV=3 - [ODPB_HUMAN]	29.66	2.23	1	1	1	1	359	39.208	6.65381
Q08J23	tRNA (cytosine(34)-C(5))-methyltransferase OS=Homo sapiens GN=NSUN2 PE=1 SV=2 - [NSUN2_HUMAN]	29.55	2.48	1	1	1	1	767	86.4158	6.771
Q14114	Low-density lipoprotein receptor-related protein 8 OS=Homo sapiens GN=LRP8 PE=1 SV=4 - [LRP8_HUMAN]	29.53	0.83	2	1	1	1	963	105.565	5.04639
Q16585	Beta-sarcoglycan OS=Homo sapiens GN=SGCB PE=1 SV=1 - [SGCB_HUMAN]	29.29	3.14	1	1	1	1	318	34.7547	8.6167
P62310	U6 snRNA-associated Sm-like protein LSm3 OS=Homo sapiens GN=LSM3 PE=1 SV=2 - [LSM3_HUMAN]	29.2	11.76	1	1	1	1	102	11.838	4.70361
Q9NP97	Dynein light chain roadblock-type 1 OS=Homo sapiens GN=DYNLRB1 PE=1 SV=3 - [DLRB1_HUMAN]	29.15	12.5	1	1	1	1	96	10.9147	7.25439
Q9UHI8	A disintegrin and metalloproteinase with thrombospondin motifs 1 OS=Homo sapiens GN=ADAMTS1 PE=1 SV=4 - [ATS1_HUMAN]	28.92	1.55	1	1	1	1	967	105.29	6.82959
Q9BXF6	Rab11 family-interacting protein 5 OS=Homo sapiens GN=RAB11FIP5 PE=1 SV=1 - [RFIP5_HUMAN]	28.81	2.45	1	1	1	1	653	70.372	9.23193
Q96T76	MMS19 nucleotide excision repair protein homolog OS=Homo sapiens GN=MMS19 PE=1 SV=2 - [MMS19_HUMAN]	28.63	2.23	1	1	1	1	1030	113.217	6.354
Q9UBQ7	Glyoxylate reductase/hydroxypyruvate reductase OS=Homo sapiens GN=GRHPR PE=1 SV=1 - [GRHPR_HUMAN]	28.55	2.74	1	1	1	1	328	35.6457	7.38623
O14964	Hepatocyte growth factor-regulated tyrosine kinase substrate OS=Homo sapiens GN=HGS PE=1 SV=1 - [HGS_HUMAN]	28.32	1.29	1	1	1	1	777	86.1376	6.16357
P21912	Succinate dehydrogenase [ubiquinone] iron-sulfur subunit, mitochondrial OS=Homo sapiens GN=SDHB PE=1 SV=3 - [DHSB_HUMAN]	28.15	5	1	1	1	1	280	31.6088	8.76318
Q9BW60	Elongation of very long chain fatty acids protein 1 OS=Homo sapiens GN=ELOVL1 PE=1 SV=1 - [ELOV1_HUMAN]	27.96	4.66	1	1	1	1	279	32.6408	9.59814
P54802	Alpha-N-acetylglucosaminidase OS=Homo sapiens GN=NAGLU PE=1 SV=2 - [ANAG_HUMAN]	27.75	2.96	1	1	1	1	743	82.2136	6.65381
P84022	Mothers against decapentaplegic homolog 3 OS=Homo sapiens GN=SMAD3 PE=1 SV=1 - [SMAD3_HUMAN]	27.69	3.06	3	1	1	1	425	48.0498	7.15186
P48729	Casein kinase I isoform alpha OS=Homo sapiens GN=CSNK1A1 PE=1 SV=2 - [KC1A_HUMAN]	27.6	2.67	2	1	1	1	337	38.8899	9.56885
Q96B26	Exosome complex component RRP43 OS=Homo sapiens GN=EXOSC8 PE=1 SV=1 - [EXOS8_HUMAN]	27.53	9.78	1	1	1	1	276	30.0203	5.30029
P41214	Eukaryotic translation initiation factor 2D OS=Homo sapiens GN=EIF2D PE=1 SV=3 - [EIF2D_HUMAN]	27.37	2.91	1	1	1	1	584	64.6655	7.6499
A0A075B6X5	T cell receptor alpha variable 18 OS=Homo sapiens OX=9606 GN=TRAV18 PE=3 SV=1 - [TVA18_HUMAN]	27.2	6.31	1	1	1	1	111	12.4062	5.37646
Q9Y5J5	Pleckstrin homology-like domain family A member 3 OS=Homo sapiens GN=PHLDA3 PE=1 SV=1 - [PHLA3_HUMAN]	27.04	14.17	1	2	2	2	127	13.8824	9.67139
O00264	Membrane-associated progesterone receptor component 1 OS=Homo sapiens GN=PGRMC1 PE=1 SV=3 - [PGRC1_HUMAN]	27	4.1	1	1	1	1	195	21.6578	4.70361
Q96KP1	Exocyst complex component 2 OS=Homo sapiens GN=EXOC2 PE=1 SV=1 - [EXOC2_HUMAN]	26.98	1.62	1	1	1	1	924	104	6.90283
Q15459	Splicing factor 3A subunit 1 OS=Homo sapiens GN=SF3A1 PE=1 SV=1 - [SF3A1_HUMAN]	26.95	3.03	1	1	1	1	793	88.8305	5.22412
Q53H96	Pyrroline-5-carboxylate reductase 3 OS=Homo sapiens GN=PYCRL PE=1 SV=3 - [P5CR3_HUMAN]	26.89	4.74	1	1	1	1	274	28.6449	7.72314
P18850	Cyclic AMP-dependent transcription factor ATF-6 alpha OS=Homo sapiens GN=ATF6 PE=1 SV=3 - [ATF6A_HUMAN]	26.7678	0.75	8	1	1	2	670	74.5381	8.22119
Q9NUM4	Transmembrane protein 106B OS=Homo sapiens GN=TMEM106B PE=1 SV=2 - [T106B_HUMAN]	26.62	4.01	1	1	1	1	274	31.1076	6.99072
Q01970	1-phosphatidylinositol-4,5-bisphosphate phosphodiesterase beta-3 OS=Homo sapiens GN=PLCB3 PE=1 SV=2 - [PLCB3_HUMAN]	26.61	2.59	1	2	2	3	1234	138.713	5.89697
Q969T9	WW domain-binding protein 2 OS=Homo sapiens GN=WBP2 PE=1 SV=1 - [WBP2_HUMAN]	26.59	2.3	2	1	1	1	261	28.0684	5.90967
Q9H488	GDP-fucose protein O-fucosyltransferase 1 OS=Homo sapiens GN=POFUT1 PE=1 SV=1 - [OFUT1_HUMAN]	26.57	2.58	1	1	1	1	388	43.9272	8.52881
Q9Y6W3	Calpain-7 OS=Homo sapiens GN=CAPN7 PE=1 SV=1 - [CAN7_HUMAN]	26.56	1.72	1	1	1	1	813	92.5938	7.6499
Q9BWH6	RNA polymerase II-associated protein 1 OS=Homo sapiens GN=RPAP1 PE=1 SV=3 - [RPAP1_HUMAN]	26.11	2.01	1	1	1	1	1393	152.659	6.37939
Q15181	Inorganic pyrophosphatase OS=Homo sapiens GN=PPA1 PE=1 SV=2 - [IPYR_HUMAN]	26.1	2.77	1	1	1	1	289	32.6392	5.85889
P78368	Casein kinase I isoform gamma-2 OS=Homo sapiens GN=CSNK1G2 PE=1 SV=1 - [KC1G2_HUMAN]	26.01	2.41	3	1	1	1	415	47.4272	9.05615
O95347	Structural maintenance of chromosomes protein 2 OS=Homo sapiens GN=SMC2 PE=1 SV=2 - [SMC2_HUMAN]	25.82	0.92	1	1	1	1	1197	135.572	8.42627
Q05209	Tyrosine-protein phosphatase non-receptor type 12 OS=Homo sapiens GN=PTPN12 PE=1 SV=3 - [PTN12_HUMAN]	25.69	1.92	1	1	1	1	780	88.0514	5.61768
Q969E2	Secretory carrier-associated membrane protein 4 OS=Homo sapiens GN=SCAMP4 PE=2 SV=1 - [SCAM4_HUMAN]	25.61	3.93	1	1	1	1	229	25.7107	8.82178
P07602	Proactivator polypeptide OS=Homo sapiens GN=PSAP PE=1 SV=2 - [SAP_HUMAN]	25.57	2.86	1	1	1	2	524	58.0739	5.17334
Q02818	Nucleobindin-1 OS=Homo sapiens GN=NUCB1 PE=1 SV=4 - [NUCB1_HUMAN]	25.54	2.82	1	1	1	1	461	53.8463	5.24951
O60271	C-Jun-amino-terminal kinase-interacting protein 4 OS=Homo sapiens GN=SPAG9 PE=1 SV=4 - [JIP4_HUMAN]	25.53	2.35	1	1	1	1	1321	146.115	5.14795
Q15293	Reticulocalbin-1 OS=Homo sapiens GN=RCN1 PE=1 SV=1 - [RCN1_HUMAN]	25.5	9.67	1	2	2	2	331	38.8662	4.99561
O75533	Splicing factor 3B subunit 1 OS=Homo sapiens GN=SF3B1 PE=1 SV=3 - [SF3B1_HUMAN]	25.43	0.69	1	1	1	1	1304	145.738	7.09326
P07225	Vitamin K-dependent protein S OS=Homo sapiens GN=PROS1 PE=1 SV=1 - [PROS_HUMAN]	25.41	3.85	1	2	2	2	676	75.0739	5.66846
Q9ULF5	Zinc transporter ZIP10 OS=Homo sapiens GN=SLC39A10 PE=1 SV=2 - [S39AA_HUMAN]	25.38	1.08	1	1	1	1	831	94.0727	6.75635
Q9BVP2	Guanine nucleotide-binding protein-like 3 OS=Homo sapiens GN=GNL3 PE=1 SV=2 - [GNL3_HUMAN]	25.32	2.73	1	1	1	1	549	61.9545	9.15869
Q93034	Cullin-5 OS=Homo sapiens GN=CUL5 PE=1 SV=4 - [CUL5_HUMAN]	25.23	2.31	1	1	1	1	780	90.8974	7.94287
O14986	Phosphatidylinositol-4-phosphate 5-kinase type-1 beta OS=Homo sapiens GN=PIP5K1B PE=1 SV=2 - [PI51B_HUMAN]	25.2	2.59	3	1	1	1	540	60.9978	6.85889
P53597	Succinyl-CoA ligase [ADP/GDP-forming] subunit alpha, mitochondrial OS=Homo sapiens GN=SUCLG1 PE=1 SV=4 - [SUCA_HUMAN]	25.19	2.89	1	1	1	1	346	36.2268	8.79248
Q8N1N4	Keratin, type II cytoskeletal 78 OS=Homo sapiens GN=KRT78 PE=2 SV=2 - [K2C78_HUMAN]	25.09	2.12	1	1	1	1	520	56.8305	6.02393
P05204	Non-histone chromosomal protein HMG-17 OS=Homo sapiens GN=HMGN2 PE=1 SV=3 - [HMGN2_HUMAN]	25.05	16.67	1	1	1	1	90	9.38706	9.99365
Q96DR8	Mucin-like protein 1 OS=Homo sapiens GN=MUCL1 PE=1 SV=1 - [MUCL1_HUMAN]	24.96	7.78	1	1	1	1	90	9.03363	4.64014
Q9Y5K6	CD2-associated protein OS=Homo sapiens GN=CD2AP PE=1 SV=1 - [CD2AP_HUMAN]	24.94	2.19	1	1	1	1	639	71.4073	6.40479
Q15599	Na(+)/H(+) exchange regulatory cofactor NHE-RF2 OS=Homo sapiens GN=SLC9A3R2 PE=1 SV=2 - [NHRF2_HUMAN]	24.92	3.86	1	1	1	1	337	37.391	7.92822
Q6PJG2	Uncharacterized protein C14orf43 OS=Homo sapiens GN=C14orf43 PE=1 SV=2 - [CN043_HUMAN]	24.84	1.24	1	1	1	1	1045	114.918	9.18799
Q709C8	Vacuolar protein sorting-associated protein 13C OS=Homo sapiens GN=VPS13C PE=1 SV=1 - [VP13C_HUMAN]	24.73	0.35	1	1	1	1	3753	422.124	6.82959
P55039	Developmentally-regulated GTP-binding protein 2 OS=Homo sapiens GN=DRG2 PE=1 SV=1 - [DRG2_HUMAN]	24.68	2.75	1	1	1	1	364	40.7204	8.88037
Q6L8Q7	2',5'-phosphodiesterase 12 OS=Homo sapiens GN=PDE12 PE=1 SV=2 - [PDE12_HUMAN]	24.42	3.45	1	1	1	2	609	67.3089	6.56592
Q96S99	Pleckstrin homology domain-containing family F member 1 OS=Homo sapiens GN=PLEKHF1 PE=1 SV=3 - [PKHF1_HUMAN]	24.37	4.66	1	1	1	1	279	31.1747	8.23584
O95149	Snurportin-1 OS=Homo sapiens GN=SNUPN PE=1 SV=1 - [SPN1_HUMAN]	24.37	2.22	1	1	1	1	360	41.1162	6.63916
P05067	Amyloid beta A4 protein OS=Homo sapiens GN=APP PE=1 SV=3 - [A4_HUMAN]	24.3	1.3	1	1	1	1	770	86.8881	4.81787
Q32P28	Prolyl 3-hydroxylase 1 OS=Homo sapiens GN=LEPRE1 PE=1 SV=2 - [P3H1_HUMAN]	24.23	1.36	1	1	1	1	736	83.3411	5.13525
Q9NZZ3	Charged multivesicular body protein 5 OS=Homo sapiens GN=CHMP5 PE=1 SV=1 - [CHMP5_HUMAN]	24.13	7.31	1	1	1	1	219	24.5554	4.83057
Q13618	Cullin-3 OS=Homo sapiens GN=CUL3 PE=1 SV=2 - [CUL3_HUMAN]	24	1.17	1	1	1	1	768	88.8735	8.48486
Q9BV57	1,2-dihydroxy-3-keto-5-methylthiopentene dioxygenase OS=Homo sapiens GN=ADI1 PE=1 SV=1 - [MTND_HUMAN]	23.88	7.82	1	1	1	1	179	21.4846	5.68115
Q9BRR6	ADP-dependent glucokinase OS=Homo sapiens GN=ADPGK PE=1 SV=1 - [ADPGK_HUMAN]	23.77	4.43	1	1	1	1	497	54.0547	6.20166
Q14118	Dystroglycan OS=Homo sapiens GN=DAG1 PE=1 SV=2 - [DAG1_HUMAN]	23.77	0.89	1	1	1	1	895	97.3807	8.55811
Q9NPD3	Exosome complex component RRP41 OS=Homo sapiens GN=EXOSC4 PE=1 SV=3 - [EXOS4_HUMAN]	23.76	4.9	1	1	1	1	245	26.3665	6.52197
P61081	NEDD8-conjugating enzyme Ubc12 OS=Homo sapiens GN=UBE2M PE=1 SV=1 - [UBC12_HUMAN]	23.74	6.01	1	1	1	1	183	20.8866	7.69385
Q6XQN6	Nicotinate phosphoribosyltransferase OS=Homo sapiens GN=NAPRT PE=1 SV=2 - [PNCB_HUMAN]	23.71	4.46	1	1	1	1	538	57.542	5.68115
O00471	Exocyst complex component 5 OS=Homo sapiens GN=EXOC5 PE=1 SV=1 - [EXOC5_HUMAN]	23.61	2.68	1	1	1	1	708	81.8008	6.7124
O75844	CAAX prenyl protease 1 homolog OS=Homo sapiens GN=ZMPSTE24 PE=1 SV=2 - [FACE1_HUMAN]	23.55	1.68	1	1	1	1	475	54.7775	7.48877
O00507	Probable ubiquitin carboxyl-terminal hydrolase FAF-Y OS=Homo sapiens GN=USP9Y PE=1 SV=2 - [USP9Y_HUMAN]	23.52	0.82	2	1	1	1	2555	290.891	5.85889
Q9UMS4	Pre-mRNA-processing factor 19 OS=Homo sapiens GN=PRPF19 PE=1 SV=1 - [PRP19_HUMAN]	23.42	2.78	1	1	1	1	504	55.1463	6.60986
Q7LBR1	Charged multivesicular body protein 1b OS=Homo sapiens GN=CHMP1B PE=1 SV=1 - [CHM1B_HUMAN]	23.37	4.02	1	1	1	1	199	22.0952	8.104
Q9HAU0	Pleckstrin homology domain-containing family A member 5 OS=Homo sapiens GN=PLEKHA5 PE=1 SV=1 - [PKHA5_HUMAN]	23.23	1.43	1	1	1	1	1116	127.385	7.53271
O60245	Protocadherin-7 OS=Homo sapiens GN=PCDH7 PE=1 SV=2 - [PCDH7_HUMAN]	23.02	1.12	1	1	1	1	1069	116	5.18604
P62750	60S ribosomal protein L23a OS=Homo sapiens GN=RPL23A PE=1 SV=1 - [RL23A_HUMAN]	23	8.33	1	1	1	1	156	17.6841	10.4478
Q147X3	N-alpha-acetyltransferase 30 OS=Homo sapiens GN=NAA30 PE=1 SV=1 - [NAA30_HUMAN]	22.97	5.25	1	1	1	2	362	39.2946	5.51611
P25205	DNA replication licensing factor MCM3 OS=Homo sapiens GN=MCM3 PE=1 SV=3 - [MCM3_HUMAN]	22.87	1.49	1	1	1	1	808	90.924	5.77002
Q9HCU5	Prolactin regulatory element-binding protein OS=Homo sapiens GN=PREB PE=1 SV=2 - [PREB_HUMAN]	22.74	6.47	1	1	1	1	417	45.4397	7.88428
Q9NS15	Latent-transforming growth factor beta-binding protein 3 OS=Homo sapiens GN=LTBP3 PE=1 SV=4 - [LTBP3_HUMAN]	22.73	1	1	1	1	1	1303	139.267	6.07471
Q9BY44	Eukaryotic translation initiation factor 2A OS=Homo sapiens GN=EIF2A PE=1 SV=3 - [EIF2A_HUMAN]	22.42	3.76	1	1	1	1	585	64.9492	8.86572
P30626	Sorcin OS=Homo sapiens GN=SRI PE=1 SV=1 - [SORCN_HUMAN]	22.3	5.56	1	1	1	1	198	21.6624	5.59229
Q8NCH0	Carbohydrate sulfotransferase 14 OS=Homo sapiens GN=CHST14 PE=1 SV=2 - [CHSTE_HUMAN]	22.22	2.39	1	1	1	1	376	42.9694	9.48096
Q9Y3C6	Peptidyl-prolyl cis-trans isomerase-like 1 OS=Homo sapiens GN=PPIL1 PE=1 SV=1 - [PPIL1_HUMAN]	22.2	10.24	1	1	1	1	166	18.2251	7.98682
P30825	High affinity cationic amino acid transporter 1 OS=Homo sapiens GN=SLC7A1 PE=1 SV=1 - [CTR1_HUMAN]	22.17	2.07	2	1	1	1	629	67.5941	5.42725
Q13449	Limbic system-associated membrane protein OS=Homo sapiens GN=LSAMP PE=1 SV=2 - [LSAMP_HUMAN]	22.09	2.37	1	1	1	1	338	37.3702	6.97607
Q99447	Ethanolamine-phosphate cytidylyltransferase OS=Homo sapiens GN=PCYT2 PE=1 SV=1 - [PCY2_HUMAN]	21.95	3.08	1	1	1	1	389	43.8079	6.91748
Q9Y2Z0	Suppressor of G2 allele of SKP1 homolog OS=Homo sapiens GN=SUGT1 PE=1 SV=3 - [SUGT1_HUMAN]	21.9	3.84	1	1	1	1	365	40.9985	5.16064
Q9UJX2	Cell division cycle protein 23 homolog OS=Homo sapiens GN=CDC23 PE=1 SV=3 - [CDC23_HUMAN]	21.89	6.2	1	2	2	3	597	68.79	7.02002
Q9BRF8	Calcineurin-like phosphoesterase domain-containing protein 1 OS=Homo sapiens GN=CPPED1 PE=1 SV=3 - [CPPED_HUMAN]	21.89	3.5	1	1	1	1	314	35.5259	6.20166
O00116	Alkyldihydroxyacetonephosphate synthase, peroxisomal OS=Homo sapiens GN=AGPS PE=1 SV=1 - [ADAS_HUMAN]	21.73	1.37	1	1	1	3	658	72.8658	7.34229
Q9UGP4	LIM domain-containing protein 1 OS=Homo sapiens GN=LIMD1 PE=1 SV=1 - [LIMD1_HUMAN]	21.71	1.78	1	1	1	1	676	72.1439	6.65381
P49841	Glycogen synthase kinase-3 beta OS=Homo sapiens GN=GSK3B PE=1 SV=2 - [GSK3B_HUMAN]	21.68	2.38	2	1	1	1	420	46.7149	8.77783
Q8NA69	Uncharacterized protein C19orf45 OS=Homo sapiens GN=C19orf45 PE=2 SV=2 - [CS045_HUMAN]	21.33	1.78	1	1	1	1	505	57.2946	8.80713
Q96RP9	Elongation factor G, mitochondrial OS=Homo sapiens GN=GFM1 PE=1 SV=2 - [EFGM_HUMAN]	21.07	2	1	1	1	1	751	83.4184	7.00537
P53804	E3 ubiquitin-protein ligase TTC3 OS=Homo sapiens GN=TTC3 PE=1 SV=2 - [TTC3_HUMAN]	21.04	0.59	1	1	1	1	2025	229.724	7.51807
P23229	Integrin alpha-6 OS=Homo sapiens GN=ITGA6 PE=1 SV=5 - [ITA6_HUMAN]	20.97	2.83	1	1	2	2	1130	126.526	6.60986
Q99623	Prohibitin-2 OS=Homo sapiens GN=PHB2 PE=1 SV=2 - [PHB2_HUMAN]	20.82	3.68	1	1	1	1	299	33.2759	9.83252
Q9NZB2	Constitutive coactivator of PPAR-gamma-like protein 1 OS=Homo sapiens GN=FAM120A PE=1 SV=2 - [F120A_HUMAN]	20.61	1.25	1	1	1	1	1118	121.811	8.88037
P60520	Gamma-aminobutyric acid receptor-associated protein-like 2 OS=Homo sapiens GN=GABARAPL2 PE=1 SV=1 - [GBRL2_HUMAN]	20.57	9.4	1	1	1	1	117	13.6581	8.104
Q8N9N7	Leucine-rich repeat-containing protein 57 OS=Homo sapiens GN=LRRC57 PE=1 SV=1 - [LRC57_HUMAN]	20.45	4.6	1	1	1	1	239	26.7373	8.42627
Q14558	Phosphoribosyl pyrophosphate synthase-associated protein 1 OS=Homo sapiens GN=PRPSAP1 PE=1 SV=2 - [KPRA_HUMAN]	20.38	4.78	1	1	1	1	356	39.3686	7.1958
Q8NBJ7	Sulfatase-modifying factor 2 OS=Homo sapiens GN=SUMF2 PE=1 SV=2 - [SUMF2_HUMAN]	20.27	3.32	1	1	1	1	301	33.8218	8.00146
P19784	Casein kinase II subunit alpha' OS=Homo sapiens GN=CSNK2A2 PE=1 SV=1 - [CSK22_HUMAN]	17.51	4	1	1	1	1	350	41.1871	8.55811
Q6ZRS2	Helicase SRCAP OS=Homo sapiens GN=SRCAP PE=1 SV=3 - [SRCAP_HUMAN]	0	0.28	1	1	1	2	3230	343.343	5.96045
Q6PKG0	La-related protein 1 OS=Homo sapiens GN=LARP1 PE=1 SV=2 - [LARP1_HUMAN]	0	1.09	1	1	1	1	1096	123.434	8.82178
Q9NVE4	Coiled-coil domain-containing protein 87 OS=Homo sapiens GN=CCDC87 PE=2 SV=2 - [CCD87_HUMAN]	0	1.06	1	1	1	1	849	96.3416	8.5874

## Sheet: WM115 - Biol. replicate 2
Accession	Description	Score	Coverage	# Proteins	# Unique Peptides	# Peptides	# PSMs	# AAs	MW [kDa]	calc. pI
P63261	Actin, cytoplasmic 2 OS=Homo sapiens GN=ACTG1 PE=1 SV=1 - [ACTG_HUMAN]	14968.9	82.13	6	3	35	313	375	41.7658	5.47803
P60709	Actin, cytoplasmic 1 OS=Homo sapiens GN=ACTB PE=1 SV=1 - [ACTB_HUMAN]	14651.6	81.87	6	1	33	308	375	41.7097	5.47803
P04406	Glyceraldehyde-3-phosphate dehydrogenase OS=Homo sapiens GN=GAPDH PE=1 SV=3 - [G3P_HUMAN]	11070.1	80.3	1	19	20	287	335	36.0304	8.45557
P06733	Alpha-enolase OS=Homo sapiens GN=ENO1 PE=1 SV=2 - [ENOA_HUMAN]	9242.69	68.2	1	17	22	159	434	47.1393	7.38623
P14618	Pyruvate kinase isozymes M1/M2 OS=Homo sapiens GN=PKM2 PE=1 SV=4 - [KPYM_HUMAN]	8582.9	84.18	3	44	44	180	531	57.9	7.84033
P35580	Myosin-10 OS=Homo sapiens GN=MYH10 PE=1 SV=3 - [MYH10_HUMAN]	6140.97	42.31	1	60	69	108	1976	228.858	5.5415
P05023	Sodium/potassium-transporting ATPase subunit alpha-1 OS=Homo sapiens GN=ATP1A1 PE=1 SV=1 - [AT1A1_HUMAN]	5911.6	40.96	7	26	36	99	1023	112.824	5.49072
Q14204	Cytoplasmic dynein 1 heavy chain 1 OS=Homo sapiens GN=DYNC1H1 PE=1 SV=5 - [DYHC1_HUMAN]	5851.62	31.88	1	101	101	125	4646	532.072	6.40479
P49327	Fatty acid synthase OS=Homo sapiens GN=FASN PE=1 SV=3 - [FAS_HUMAN]	5132.91	46.75	1	73	73	116	2511	273.254	6.44287
P35579	Myosin-9 OS=Homo sapiens GN=MYH9 PE=1 SV=4 - [MYH9_HUMAN]	5029.78	40.36	3	55	65	98	1960	226.392	5.60498
P21333	Filamin-A OS=Homo sapiens GN=FLNA PE=1 SV=4 - [FLNA_HUMAN]	4948.35	42.43	2	64	69	112	2647	280.564	6.06201
P68104	Elongation factor 1-alpha 1 OS=Homo sapiens GN=EEF1A1 PE=1 SV=1 - [EF1A1_HUMAN]	4930.01	59.96	3	17	17	107	462	50.1091	9.01221
P46940	Ras GTPase-activating-like protein IQGAP1 OS=Homo sapiens GN=IQGAP1 PE=1 SV=1 - [IQGA1_HUMAN]	4585.18	50.39	1	55	56	81	1657	189.134	6.48096
O43707	Alpha-actinin-4 OS=Homo sapiens GN=ACTN4 PE=1 SV=2 - [ACTN4_HUMAN]	4465.76	68.83	1	36	54	92	911	104.788	5.43994
Q9Y490	Talin-1 OS=Homo sapiens GN=TLN1 PE=1 SV=3 - [TLN1_HUMAN]	4411.96	34.47	1	44	47	74	2541	269.599	6.07471
Q13813	Spectrin alpha chain, brain OS=Homo sapiens GN=SPTAN1 PE=1 SV=3 - [SPTA2_HUMAN]	4398.43	36.69	1	62	62	87	2472	284.364	5.35107
Q00610	Clathrin heavy chain 1 OS=Homo sapiens GN=CLTC PE=1 SV=5 - [CLH1_HUMAN]	4260.97	45.55	2	51	51	82	1675	191.493	5.69385
P09104	Gamma-enolase OS=Homo sapiens GN=ENO2 PE=1 SV=3 - [ENOG_HUMAN]	3982.09	54.84	1	9	13	58	434	47.239	5.03369
P02751	Fibronectin OS=Homo sapiens GN=FN1 PE=1 SV=4 - [FINC_HUMAN]	3959.09	41.03	1	53	53	81	2386	262.46	5.70654
P12814	Alpha-actinin-1 OS=Homo sapiens GN=ACTN1 PE=1 SV=2 - [ACTN1_HUMAN]	3918.86	67.04	3	30	48	86	892	102.993	5.41455
P26038	Moesin OS=Homo sapiens GN=MSN PE=1 SV=3 - [MOES_HUMAN]	3836.5	63.95	4	23	36	83	577	67.7778	6.40479
Q6UVK1	Chondroitin sulfate proteoglycan 4 OS=Homo sapiens GN=CSPG4 PE=1 SV=2 - [CSPG4_HUMAN]	3819.75	37.73	1	51	52	75	2322	250.382	5.46533
P68032	Actin, alpha cardiac muscle 1 OS=Homo sapiens GN=ACTC1 PE=1 SV=1 - [ACTC_HUMAN]	3728.27	41.38	4	2	19	133	377	41.9919	5.38916
P13639	Elongation factor 2 OS=Homo sapiens GN=EEF2 PE=1 SV=4 - [EF2_HUMAN]	3553.8	54.66	2	36	37	88	858	95.277	6.82959
P50993	Sodium/potassium-transporting ATPase subunit alpha-2 OS=Homo sapiens GN=ATP1A2 PE=1 SV=1 - [AT1A2_HUMAN]	3480.57	14.31	3	1	11	44	1020	112.193	5.65576
P04899	Guanine nucleotide-binding protein G(i) subunit alpha-2 OS=Homo sapiens GN=GNAI2 PE=1 SV=3 - [GNAI2_HUMAN]	3446.19	55.21	5	9	14	67	355	40.4251	5.5415
P08238	Heat shock protein HSP 90-beta OS=Homo sapiens GN=HSP90AB1 PE=1 SV=4 - [HS90B_HUMAN]	3444.28	56.91	5	21	33	76	724	83.2121	5.03369
P08754	Guanine nucleotide-binding protein G(k) subunit alpha OS=Homo sapiens GN=GNAI3 PE=1 SV=3 - [GNAI3_HUMAN]	3384.6	48.02	5	8	12	64	354	40.5063	5.69385
Q9NZM1	Myoferlin OS=Homo sapiens GN=MYOF PE=1 SV=1 - [MYOF_HUMAN]	3364.74	40.85	2	60	60	72	2061	234.561	6.17627
P13929	Beta-enolase OS=Homo sapiens GN=ENO3 PE=1 SV=5 - [ENOB_HUMAN]	3348.62	20.74	1	1	6	52	434	46.9573	7.7085
P11142	Heat shock cognate 71 kDa protein OS=Homo sapiens GN=HSPA8 PE=1 SV=1 - [HSP7C_HUMAN]	3244.62	60.68	1	19	30	69	646	70.8542	5.51611
Q09666	Neuroblast differentiation-associated protein AHNAK OS=Homo sapiens GN=AHNAK PE=1 SV=2 - [AHNK_HUMAN]	3149.82	28.95	1	67	71	84	5890	628.699	6.15088
Q15149	Plectin OS=Homo sapiens GN=PLEC PE=1 SV=3 - [PLEC_HUMAN]	3035.2	16.76	2	56	56	65	4684	531.466	5.96045
P07900	Heat shock protein HSP 90-alpha OS=Homo sapiens GN=HSP90AA1 PE=1 SV=5 - [HS90A_HUMAN]	2933.47	52.19	8	21	31	66	732	84.6067	5.021
P00338	L-lactate dehydrogenase A chain OS=Homo sapiens GN=LDHA PE=1 SV=2 - [LDHA_HUMAN]	2886.31	71.99	4	20	22	68	332	36.6654	8.26514
Q01082	Spectrin beta chain, brain 1 OS=Homo sapiens GN=SPTBN1 PE=1 SV=2 - [SPTB2_HUMAN]	2881.8	29.4	3	44	44	59	2364	274.439	5.56689
P63096	Guanine nucleotide-binding protein G(i) subunit alpha-1 OS=Homo sapiens GN=GNAI1 PE=1 SV=2 - [GNAI1_HUMAN]	2875.91	37.29	5	4	9	57	354	40.3352	5.97314
P08758	Annexin A5 OS=Homo sapiens GN=ANXA5 PE=1 SV=2 - [ANXA5_HUMAN]	2867.94	69.06	1	20	21	55	320	35.9144	5.04639
O00159	Unconventional myosin-Ic OS=Homo sapiens GN=MYO1C PE=1 SV=4 - [MYO1C_HUMAN]	2767.76	43.37	1	36	36	57	1063	121.606	9.40771
P35241	Radixin OS=Homo sapiens GN=RDX PE=1 SV=1 - [RADI_HUMAN]	2728.23	55.23	4	18	32	67	583	68.5214	6.3667
P07355	Annexin A2 OS=Homo sapiens GN=ANXA2 PE=1 SV=2 - [ANXA2_HUMAN]	2493.49	70.8	2	26	26	59	339	38.5798	7.75244
P68371	Tubulin beta-4B chain OS=Homo sapiens GN=TUBB4B PE=1 SV=1 - [TBB4B_HUMAN]	2483.32	74.16	4	1	22	53	445	49.799	4.89404
P06396	Gelsolin OS=Homo sapiens GN=GSN PE=1 SV=1 - [GELS_HUMAN]	2402.83	42.84	1	20	20	51	782	85.6442	6.27783
P04075	Fructose-bisphosphate aldolase A OS=Homo sapiens GN=ALDOA PE=1 SV=2 - [ALDOA_HUMAN]	2384.78	75.27	1	17	20	47	364	39.3953	8.08936
P13761	HLA class II histocompatibility antigen, DRB1-7 beta chain OS=Homo sapiens GN=HLA-DRB1 PE=1 SV=1 - [2B17_HUMAN]	2303.83	55.26	4	7	10	43	266	29.803	7.44482
P07437	Tubulin beta chain OS=Homo sapiens GN=TUBB PE=1 SV=2 - [TBB5_HUMAN]	2288.13	71.62	4	2	22	49	444	49.639	4.89404
Q9P2B2	Prostaglandin F2 receptor negative regulator OS=Homo sapiens GN=PTGFRN PE=1 SV=2 - [FPRP_HUMAN]	2279.54	31.29	1	21	21	44	879	98.4946	6.60986
Q9BVA1	Tubulin beta-2B chain OS=Homo sapiens GN=TUBB2B PE=1 SV=1 - [TBB2B_HUMAN]	2272.83	76.85	3	4	22	51	445	49.9209	4.89404
P06756	Integrin alpha-V OS=Homo sapiens GN=ITGAV PE=1 SV=2 - [ITAV_HUMAN]	2147.67	34.16	1	26	26	44	1048	115.964	5.68115
P68363	Tubulin alpha-1B chain OS=Homo sapiens GN=TUBA1B PE=1 SV=1 - [TBA1B_HUMAN]	2140.73	62.75	4	1	20	43	451	50.1196	5.05908
Q71U36	Tubulin alpha-1A chain OS=Homo sapiens GN=TUBA1A PE=1 SV=1 - [TBA1A_HUMAN]	1980.25	62.75	4	1	19	40	451	50.1036	5.05908
P43121	Cell surface glycoprotein MUC18 OS=Homo sapiens GN=MCAM PE=1 SV=2 - [MUC18_HUMAN]	1968.99	44.74	1	22	22	37	646	71.5626	5.75732
P40227	T-complex protein 1 subunit zeta OS=Homo sapiens GN=CCT6A PE=1 SV=3 - [TCPZ_HUMAN]	1955.64	43.5	1	14	14	37	531	57.9876	6.68311
P10809	60 kDa heat shock protein, mitochondrial OS=Homo sapiens GN=HSPD1 PE=1 SV=2 - [CH60_HUMAN]	1925.56	49.04	1	14	15	31	573	61.0164	5.87158
P22314	Ubiquitin-like modifier-activating enzyme 1 OS=Homo sapiens GN=UBA1 PE=1 SV=3 - [UBA1_HUMAN]	1923.43	42.44	1	29	29	40	1058	117.774	5.75732
P35221	Catenin alpha-1 OS=Homo sapiens GN=CTNNA1 PE=1 SV=1 - [CTNA1_HUMAN]	1914.43	46.91	2	23	23	36	906	100.009	6.29053
P55072	Transitional endoplasmic reticulum ATPase OS=Homo sapiens GN=VCP PE=1 SV=4 - [TERA_HUMAN]	1881.65	57.07	1	31	31	42	806	89.2657	5.26221
P29401	Transketolase OS=Homo sapiens GN=TKT PE=1 SV=3 - [TKT_HUMAN]	1854.69	40.13	1	17	17	49	623	67.8347	7.66455
Q01518	Adenylyl cyclase-associated protein 1 OS=Homo sapiens GN=CAP1 PE=1 SV=5 - [CAP1_HUMAN]	1853.44	33.47	1	12	12	31	475	51.8687	8.06006
Q9BQE3	Tubulin alpha-1C chain OS=Homo sapiens GN=TUBA1C PE=1 SV=1 - [TBA1C_HUMAN]	1850.97	63.03	3	2	20	40	449	49.8635	5.09717
P13762	HLA class II histocompatibility antigen, DR beta 4 chain OS=Homo sapiens GN=HLA-DRB4 PE=1 SV=2 - [DRB4_HUMAN]	1835.17	55.26	2	7	9	30	266	29.9219	7.32764
P08670	Vimentin OS=Homo sapiens GN=VIM PE=1 SV=4 - [VIME_HUMAN]	1827.91	54.29	17	23	24	44	466	53.6191	5.12256
P08195	4F2 cell-surface antigen heavy chain OS=Homo sapiens GN=SLC3A2 PE=1 SV=3 - [4F2_HUMAN]	1818.91	47.46	1	22	22	41	630	67.9517	5.0083
P11216	Glycogen phosphorylase, brain form OS=Homo sapiens GN=PYGB PE=1 SV=5 - [PYGB_HUMAN]	1816.54	47.45	1	27	31	42	843	96.6345	6.85889
Q08431	Lactadherin OS=Homo sapiens OX=9606 GN=MFGE8 PE=1 SV=3 - [MFGM_HUMAN]	1811.51	65.63	1	18	18	35	387	43.0775	8.14795
P43490	Nicotinamide phosphoribosyltransferase OS=Homo sapiens GN=NAMPT PE=1 SV=1 - [NAMPT_HUMAN]	1764.06	52.95	1	19	19	33	491	55.4866	7.15186
Q14974	Importin subunit beta-1 OS=Homo sapiens GN=KPNB1 PE=1 SV=2 - [IMB1_HUMAN]	1756.58	41.89	1	21	21	36	876	97.108	4.77979
Q13509	Tubulin beta-3 chain OS=Homo sapiens GN=TUBB3 PE=1 SV=2 - [TBB3_HUMAN]	1746.05	57.33	1	5	18	38	450	50.4003	4.93213
P00558	Phosphoglycerate kinase 1 OS=Homo sapiens GN=PGK1 PE=1 SV=3 - [PGK1_HUMAN]	1731.53	70.98	2	26	26	43	417	44.5861	8.104
Q99536	Synaptic vesicle membrane protein VAT-1 homolog OS=Homo sapiens GN=VAT1 PE=1 SV=2 - [VAT1_HUMAN]	1687.89	63.87	1	16	16	35	393	41.8934	6.29053
P60842	Eukaryotic initiation factor 4A-I OS=Homo sapiens GN=EIF4A1 PE=1 SV=1 - [IF4A1_HUMAN]	1687.14	58.87	1	10	17	39	406	46.1246	5.47803
P07093	Glia-derived nexin OS=Homo sapiens GN=SERPINE2 PE=1 SV=1 - [GDN_HUMAN]	1657.33	51.76	1	17	17	33	398	43.9742	9.29053
P16671	Platelet glycoprotein 4 OS=Homo sapiens GN=CD36 PE=1 SV=2 - [CD36_HUMAN]	1616.55	34.11	12	14	15	42	472	53.0193	7.95752
P17987	T-complex protein 1 subunit alpha OS=Homo sapiens GN=TCP1 PE=1 SV=1 - [TCPA_HUMAN]	1609.55	52.7	1	20	20	32	556	60.3056	6.11279
P04083	Annexin A1 OS=Homo sapiens GN=ANXA1 PE=1 SV=2 - [ANXA1_HUMAN]	1592.95	55.2	1	17	17	29	346	38.69	7.02002
P63104	14-3-3 protein zeta/delta OS=Homo sapiens GN=YWHAZ PE=1 SV=1 - [1433Z_HUMAN]	1589.95	64.08	3	14	19	35	245	27.7277	4.79248
O75083	WD repeat-containing protein 1 OS=Homo sapiens GN=WDR1 PE=1 SV=4 - [WDR1_HUMAN]	1581.11	43.73	1	15	15	25	606	66.1519	6.65381
P35222	Catenin beta-1 OS=Homo sapiens GN=CTNNB1 PE=1 SV=1 - [CTNB1_HUMAN]	1571.08	39.31	1	17	20	29	781	85.4422	5.85889
P20020	Plasma membrane calcium-transporting ATPase 1 OS=Homo sapiens OX=9606 GN=ATP2B1 PE=1 SV=4 - [AT2B1_HUMAN]	1566.79	20.57	3	11	18	29	1220	134.6	5.90967
P13645	Keratin, type I cytoskeletal 10 OS=Homo sapiens GN=KRT10 PE=1 SV=6 - [K1C10_HUMAN]	1566.61	32.88	3	11	11	22	584	58.7917	5.21143
Q92616	Translational activator GCN1 OS=Homo sapiens GN=GCN1L1 PE=1 SV=6 - [GCN1L_HUMAN]	1546.35	16.89	1	29	29	35	2671	292.572	7.47412
P48643	T-complex protein 1 subunit epsilon OS=Homo sapiens GN=CCT5 PE=1 SV=1 - [TCPE_HUMAN]	1543.75	62.11	1	22	23	38	541	59.6328	5.65576
Q6YHK3	CD109 antigen OS=Homo sapiens GN=CD109 PE=1 SV=2 - [CD109_HUMAN]	1538.63	24.57	1	22	22	28	1445	161.587	5.84619
O43795	Unconventional myosin-Ib OS=Homo sapiens GN=MYO1B PE=2 SV=3 - [MYO1B_HUMAN]	1534.23	28.43	2	23	23	31	1136	131.902	9.37842
Q86VP6	Cullin-associated NEDD8-dissociated protein 1 OS=Homo sapiens GN=CAND1 PE=1 SV=2 - [CAND1_HUMAN]	1511.81	33.09	1	24	24	34	1230	136.289	5.78271
P78371	T-complex protein 1 subunit beta OS=Homo sapiens GN=CCT2 PE=1 SV=4 - [TCPB_HUMAN]	1454.81	56.45	1	23	23	30	535	57.4521	6.45557
P07814	Bifunctional glutamate/proline--tRNA ligase OS=Homo sapiens GN=EPRS PE=1 SV=5 - [SYEP_HUMAN]	1449.68	22.62	1	21	21	32	1512	170.483	7.32764
Q99832	T-complex protein 1 subunit eta OS=Homo sapiens GN=CCT7 PE=1 SV=2 - [TCPH_HUMAN]	1407.89	37.2	1	14	14	38	543	59.3289	7.6499
P15311	Ezrin OS=Homo sapiens GN=EZR PE=1 SV=4 - [EZRI_HUMAN]	1398.61	38.57	4	8	21	36	586	69.3697	6.26514
P23528	Cofilin-1 OS=Homo sapiens GN=CFL1 PE=1 SV=3 - [COF1_HUMAN]	1358.2	75.9	1	9	12	28	166	18.4907	8.08936
O60716	Catenin delta-1 OS=Homo sapiens GN=CTNND1 PE=1 SV=1 - [CTND1_HUMAN]	1333.91	18.9	1	14	14	27	968	108.103	6.22705
P30153	Serine/threonine-protein phosphatase 2A 65 kDa regulatory subunit A alpha isoform OS=Homo sapiens GN=PPP2R1A PE=1 SV=4 - [2AAA_HUMAN]	1329.96	44.99	2	17	17	27	589	65.2669	5.10986
P06744	Glucose-6-phosphate isomerase OS=Homo sapiens GN=GPI PE=1 SV=4 - [G6PI_HUMAN]	1329.48	47.85	2	16	16	31	558	63.1072	8.32373
P23634	Plasma membrane calcium-transporting ATPase 4 OS=Homo sapiens GN=ATP2B4 PE=1 SV=2 - [AT2B4_HUMAN]	1328.69	23.29	2	12	19	22	1241	137.833	6.59521
O15031	Plexin-B2 OS=Homo sapiens GN=PLXNB2 PE=1 SV=3 - [PLXB2_HUMAN]	1313.96	15.23	1	19	19	25	1838	204.997	6.23975
Q7KZF4	Staphylococcal nuclease domain-containing protein 1 OS=Homo sapiens GN=SND1 PE=1 SV=1 - [SND1_HUMAN]	1302.91	34.4	1	21	21	33	910	101.934	7.1665
P55786	Puromycin-sensitive aminopeptidase OS=Homo sapiens GN=NPEPPS PE=1 SV=2 - [PSA_HUMAN]	1294.62	37.76	2	24	24	30	919	103.211	5.71924
P13797	Plastin-3 OS=Homo sapiens GN=PLS3 PE=1 SV=4 - [PLST_HUMAN]	1261.36	52.7	2	19	23	29	630	70.7662	5.60498
P50990	T-complex protein 1 subunit theta OS=Homo sapiens GN=CCT8 PE=1 SV=4 - [TCPQ_HUMAN]	1251.7	43.07	1	19	19	28	548	59.5825	5.60498
Q9BUF5	Tubulin beta-6 chain OS=Homo sapiens GN=TUBB6 PE=1 SV=1 - [TBB6_HUMAN]	1250.08	59.19	1	8	17	32	446	49.825	4.88135
P17655	Calpain-2 catalytic subunit OS=Homo sapiens GN=CAPN2 PE=1 SV=6 - [CAN2_HUMAN]	1247.82	34.29	1	15	15	23	700	79.9448	4.98291
P49588	Alanine--tRNA ligase, cytoplasmic OS=Homo sapiens GN=AARS PE=1 SV=2 - [SYAC_HUMAN]	1246.96	31.51	1	18	18	27	968	106.743	5.52881
P53396	ATP-citrate synthase OS=Homo sapiens GN=ACLY PE=1 SV=3 - [ACLY_HUMAN]	1240.66	28.7	1	22	22	27	1101	120.762	7.32764
Q9Y4I1	Unconventional myosin-Va OS=Homo sapiens GN=MYO5A PE=1 SV=2 - [MYO5A_HUMAN]	1227.55	18.92	3	27	27	34	1855	215.269	8.48486
P50395	Rab GDP dissociation inhibitor beta OS=Homo sapiens GN=GDI2 PE=1 SV=2 - [GDIB_HUMAN]	1225.02	57.98	1	13	19	26	445	50.6309	6.46826
P01903	HLA class II histocompatibility antigen, DR alpha chain OS=Homo sapiens GN=HLA-DRA PE=1 SV=1 - [DRA_HUMAN]	1218.62	39.37	1	8	9	24	254	28.5887	4.99561
P62879	Guanine nucleotide-binding protein G(I)/G(S)/G(T) subunit beta-2 OS=Homo sapiens GN=GNB2 PE=1 SV=3 - [GBB2_HUMAN]	1215.28	79.41	3	6	16	28	340	37.3071	5.99854
P31939	Bifunctional purine biosynthesis protein PURH OS=Homo sapiens GN=ATIC PE=1 SV=3 - [PUR9_HUMAN]	1212.68	45.1	1	19	19	26	592	64.5753	6.7124
P49368	T-complex protein 1 subunit gamma OS=Homo sapiens GN=CCT3 PE=1 SV=4 - [TCPG_HUMAN]	1210.94	52.66	1	19	19	27	545	60.4953	6.49365
P62158	Calmodulin OS=Homo sapiens GN=CALM1 PE=1 SV=2 - [CALM_HUMAN]	1197.73	79.19	2	9	9	21	149	16.8268	4.22119
P11021	78 kDa glucose-regulated protein OS=Homo sapiens GN=HSPA5 PE=1 SV=2 - [GRP78_HUMAN]	1195.03	34.4	1	16	17	24	654	72.2884	5.16064
P31946	14-3-3 protein beta/alpha OS=Homo sapiens GN=YWHAB PE=1 SV=3 - [1433B_HUMAN]	1194.59	56.5	2	6	13	30	246	28.0648	4.83057
P21589	5'-nucleotidase OS=Homo sapiens GN=NT5E PE=1 SV=1 - [5NTD_HUMAN]	1191.43	33.8	1	14	14	24	574	63.3275	7.03467
P63010	AP-2 complex subunit beta OS=Homo sapiens GN=AP2B1 PE=1 SV=1 - [AP2B1_HUMAN]	1183.64	28.82	1	11	19	25	937	104.486	5.37646
P62258	14-3-3 protein epsilon OS=Homo sapiens GN=YWHAE PE=1 SV=1 - [1433E_HUMAN]	1182.59	68.24	1	16	19	34	255	29.1554	4.7417
P08133	Annexin A6 OS=Homo sapiens GN=ANXA6 PE=1 SV=3 - [ANXA6_HUMAN]	1180.53	35.51	1	18	18	24	673	75.8256	5.60498
Q14152	Eukaryotic translation initiation factor 3 subunit A OS=Homo sapiens GN=EIF3A PE=1 SV=1 - [EIF3A_HUMAN]	1169.44	15.27	1	17	17	27	1382	166.468	6.78564
P41250	Glycine--tRNA ligase OS=Homo sapiens GN=GARS PE=1 SV=3 - [SYG_HUMAN]	1164.08	31.39	1	15	15	20	739	83.1126	7.03467
P63092	Guanine nucleotide-binding protein G(s) subunit alpha isoforms short OS=Homo sapiens GN=GNAS PE=1 SV=1 - [GNAS2_HUMAN]	1159.89	48.22	7	12	13	30	394	45.6359	5.8208
P35527	Keratin, type I cytoskeletal 9 OS=Homo sapiens GN=KRT9 PE=1 SV=3 - [K1C9_HUMAN]	1150.68	31.94	1	11	11	17	623	62.0268	5.23682
P07195	L-lactate dehydrogenase B chain OS=Homo sapiens GN=LDHB PE=1 SV=2 - [LDHB_HUMAN]	1146.04	50	3	13	15	33	334	36.6151	6.04932
P07737	Profilin-1 OS=Homo sapiens GN=PFN1 PE=1 SV=2 - [PROF1_HUMAN]	1145.1	92.86	2	11	12	30	140	15.0446	8.26514
P09525	Annexin A4 OS=Homo sapiens GN=ANXA4 PE=1 SV=4 - [ANXA4_HUMAN]	1142.12	48.9	1	13	14	23	319	35.8601	6.12549
Q13200	26S proteasome non-ATPase regulatory subunit 2 OS=Homo sapiens GN=PSMD2 PE=1 SV=3 - [PSMD2_HUMAN]	1129.21	28.19	1	17	17	25	908	100.136	5.19873
O00299	Chloride intracellular channel protein 1 OS=Homo sapiens GN=CLIC1 PE=1 SV=4 - [CLIC1_HUMAN]	1124.43	59.75	1	10	10	20	241	26.9057	5.17334
P25398	40S ribosomal protein S12 OS=Homo sapiens GN=RPS12 PE=1 SV=3 - [RS12_HUMAN]	1124.06	48.48	1	5	5	19	132	14.5055	7.21045
P41252	Isoleucine--tRNA ligase, cytoplasmic OS=Homo sapiens GN=IARS PE=1 SV=2 - [SYIC_HUMAN]	1119.88	23.38	1	23	23	25	1262	144.406	6.15088
P61981	14-3-3 protein gamma OS=Homo sapiens GN=YWHAG PE=1 SV=2 - [1433G_HUMAN]	1114.79	59.11	2	7	13	29	247	28.2849	4.89404
P50991	T-complex protein 1 subunit delta OS=Homo sapiens GN=CCT4 PE=1 SV=4 - [TCPD_HUMAN]	1114.36	42.12	1	14	15	25	539	57.8878	7.82568
P14625	Endoplasmin OS=Homo sapiens GN=HSP90B1 PE=1 SV=1 - [ENPL_HUMAN]	1096.22	30.88	1	17	19	24	803	92.4113	4.84326
P21281	V-type proton ATPase subunit B, brain isoform OS=Homo sapiens GN=ATP6V1B2 PE=1 SV=3 - [VATB2_HUMAN]	1089.4	53.23	2	16	16	20	511	56.4649	5.80811
Q96TA1	Niban-like protein 1 OS=Homo sapiens GN=FAM129B PE=1 SV=3 - [NIBL1_HUMAN]	1084.79	34.85	1	18	18	24	746	84.0847	6.18896
P53621	Coatomer subunit alpha OS=Homo sapiens GN=COPA PE=1 SV=2 - [COPA_HUMAN]	1083.2	25.16	1	22	23	29	1224	138.258	7.66455
P34932	Heat shock 70 kDa protein 4 OS=Homo sapiens GN=HSPA4 PE=1 SV=4 - [HSP74_HUMAN]	1079.78	33.93	2	16	17	21	840	94.2712	5.18604
P06576	ATP synthase subunit beta, mitochondrial OS=Homo sapiens GN=ATP5B PE=1 SV=3 - [ATPB_HUMAN]	1076	49.34	1	16	16	22	529	56.5246	5.40186
P04264	Keratin, type II cytoskeletal 1 OS=Homo sapiens GN=KRT1 PE=1 SV=6 - [K2C1_HUMAN]	1069.47	28.26	4	14	16	22	644	65.999	8.11865
Q9HAV0	Guanine nucleotide-binding protein subunit beta-4 OS=Homo sapiens GN=GNB4 PE=1 SV=3 - [GBB4_HUMAN]	1061.58	55.29	2	7	14	21	340	37.543	5.99854
P06737	Glycogen phosphorylase, liver form OS=Homo sapiens GN=PYGL PE=1 SV=4 - [PYGL_HUMAN]	1058.23	36.6	1	17	21	24	847	97.087	7.1665
O43491	Band 4.1-like protein 2 OS=Homo sapiens GN=EPB41L2 PE=1 SV=1 - [E41L2_HUMAN]	1047.4	26.17	2	13	14	21	1005	112.519	5.43994
P14868	Aspartate--tRNA ligase, cytoplasmic OS=Homo sapiens GN=DARS PE=1 SV=2 - [SYDC_HUMAN]	1045.45	41.12	1	16	16	23	501	57.1	6.55127
Q14764	Major vault protein OS=Homo sapiens GN=MVP PE=1 SV=4 - [MVP_HUMAN]	1036.58	30.01	1	17	17	23	893	99.2659	5.47803
P46939	Utrophin OS=Homo sapiens GN=UTRN PE=1 SV=2 - [UTRO_HUMAN]	1033.77	9.87	1	20	21	25	3433	394.22	5.32568
O95373	Importin-7 OS=Homo sapiens GN=IPO7 PE=1 SV=1 - [IPO7_HUMAN]	1026.26	21.77	1	16	16	21	1038	119.44	4.81787
P62873	Guanine nucleotide-binding protein G(I)/G(S)/G(T) subunit beta-1 OS=Homo sapiens GN=GNB1 PE=1 SV=3 - [GBB1_HUMAN]	1015.95	52.94	2	6	12	21	340	37.353	5.99854
P12268	Inosine-5'-monophosphate dehydrogenase 2 OS=Homo sapiens GN=IMPDH2 PE=1 SV=2 - [IMDH2_HUMAN]	996.87	46.69	1	13	13	23	514	55.7696	6.90283
P43007	Neutral amino acid transporter A OS=Homo sapiens GN=SLC1A4 PE=1 SV=1 - [SATT_HUMAN]	996.86	31.95	2	11	11	16	532	55.6876	6.25244
P11586	C-1-tetrahydrofolate synthase, cytoplasmic OS=Homo sapiens GN=MTHFD1 PE=1 SV=3 - [C1TC_HUMAN]	994.74	32.73	1	18	18	20	935	101.495	7.29834
P51148	Ras-related protein Rab-5C OS=Homo sapiens GN=RAB5C PE=1 SV=2 - [RAB5C_HUMAN]	994.17	60.65	1	5	8	17	216	23.4678	8.41162
P22102	Trifunctional purine biosynthetic protein adenosine-3 OS=Homo sapiens GN=GART PE=1 SV=1 - [PUR2_HUMAN]	994.01	22.87	1	13	13	18	1010	107.699	6.69775
P15531	Nucleoside diphosphate kinase A OS=Homo sapiens GN=NME1 PE=1 SV=1 - [NDKA_HUMAN]	985.66	81.58	1	5	10	26	152	17.1377	6.18896
Q16851	UTP--glucose-1-phosphate uridylyltransferase OS=Homo sapiens GN=UGP2 PE=1 SV=5 - [UGPA_HUMAN]	983.67	33.86	1	11	11	18	508	56.9047	8.14795
O75054	Immunoglobulin superfamily member 3 OS=Homo sapiens GN=IGSF3 PE=1 SV=3 - [IGSF3_HUMAN]	979.47	20.69	1	16	16	20	1194	135.112	6.07471
P17301	Integrin alpha-2 OS=Homo sapiens GN=ITGA2 PE=1 SV=1 - [ITA2_HUMAN]	972.19	22.35	1	16	16	18	1181	129.214	5.31299
P32969	60S ribosomal protein L9 OS=Homo sapiens GN=RPL9 PE=1 SV=1 - [RL9_HUMAN]	971.67	60.94	1	7	7	21	192	21.8498	9.94971
P08107	Heat shock 70 kDa protein 1A/1B OS=Homo sapiens GN=HSPA1A PE=1 SV=5 - [HSP71_HUMAN]	963.36	33.54	2	12	16	22	641	70.009	5.65576
Q99460	26S proteasome non-ATPase regulatory subunit 1 OS=Homo sapiens GN=PSMD1 PE=1 SV=2 - [PSMD1_HUMAN]	942.55	21.41	1	12	12	15	953	105.769	5.38916
Q01813	6-phosphofructokinase type C OS=Homo sapiens GN=PFKP PE=1 SV=2 - [K6PP_HUMAN]	938.74	27.68	1	11	13	17	784	85.5415	7.54736
Q02241	Kinesin-like protein KIF23 OS=Homo sapiens GN=KIF23 PE=1 SV=3 - [KIF23_HUMAN]	938.19	22.92	1	13	13	17	960	109.99	8.51416
Q92597	Protein NDRG1 OS=Homo sapiens GN=NDRG1 PE=1 SV=1 - [NDRG1_HUMAN]	936	52.28	1	10	10	19	394	42.8077	5.8208
P05556	Integrin beta-1 OS=Homo sapiens GN=ITGB1 PE=1 SV=2 - [ITB1_HUMAN]	930.47	30.95	1	16	16	24	798	88.357	5.38916
P39023	60S ribosomal protein L3 OS=Homo sapiens GN=RPL3 PE=1 SV=2 - [RL3_HUMAN]	930.12	30.52	2	8	8	18	403	46.0798	10.1841
P63244	Guanine nucleotide-binding protein subunit beta-2-like 1 OS=Homo sapiens GN=GNB2L1 PE=1 SV=3 - [GBLP_HUMAN]	926.17	61.51	1	12	12	16	317	35.0546	7.69385
Q99497	Protein DJ-1 OS=Homo sapiens GN=PARK7 PE=1 SV=2 - [PARK7_HUMAN]	920.05	60.32	1	7	7	17	189	19.8785	6.78564
P08582	Melanotransferrin OS=Homo sapiens GN=MFI2 PE=1 SV=2 - [TRFM_HUMAN]	915.7	33.06	1	13	13	16	738	80.1633	5.93506
P26640	Valine--tRNA ligase OS=Homo sapiens GN=VARS PE=1 SV=4 - [SYVC_HUMAN]	913.56	20.17	1	15	15	22	1264	140.387	7.59131
O14578	Citron Rho-interacting kinase OS=Homo sapiens GN=CIT PE=1 SV=2 - [CTRO_HUMAN]	891.49	13.12	1	18	18	19	2027	231.286	6.56592
P41091	Eukaryotic translation initiation factor 2 subunit 3 OS=Homo sapiens GN=EIF2S3 PE=1 SV=3 - [IF2G_HUMAN]	881.17	38.56	2	11	11	17	472	51.0772	8.39697
O43776	Asparagine--tRNA ligase, cytoplasmic OS=Homo sapiens GN=NARS PE=1 SV=1 - [SYNC_HUMAN]	877.09	33.03	1	15	15	19	548	62.9025	6.25244
P09543	2',3'-cyclic-nucleotide 3'-phosphodiesterase OS=Homo sapiens GN=CNP PE=1 SV=2 - [CN37_HUMAN]	876.38	39.9	3	13	13	17	421	47.5487	9.0708
P55060	Exportin-2 OS=Homo sapiens GN=CSE1L PE=1 SV=3 - [XPO2_HUMAN]	875.58	25.64	1	15	15	22	971	110.346	5.77002
Q8WWM9	Cytoglobin OS=Homo sapiens GN=CYGB PE=1 SV=1 - [CYGB_HUMAN]	874.66	37.89	1	5	5	14	190	21.391	6.80029
P40121	Macrophage-capping protein OS=Homo sapiens GN=CAPG PE=1 SV=2 - [CAPG_HUMAN]	874.61	46.26	1	9	9	16	348	38.4745	6.18896
P18206	Vinculin OS=Homo sapiens GN=VCL PE=1 SV=4 - [VINC_HUMAN]	874.23	17.02	1	12	12	15	1134	123.722	5.65576
P35613	Basigin OS=Homo sapiens GN=BSG PE=1 SV=2 - [BASI_HUMAN]	872.84	25.19	1	6	6	15	385	42.1741	5.65576
P23381	Tryptophan--tRNA ligase, cytoplasmic OS=Homo sapiens GN=WARS PE=1 SV=2 - [SYWC_HUMAN]	870.17	47.77	1	14	14	19	471	53.1316	6.22705
P38606	V-type proton ATPase catalytic subunit A OS=Homo sapiens GN=ATP6V1A PE=1 SV=2 - [VATA_HUMAN]	868.5	47.65	1	16	16	21	617	68.2605	5.51611
Q96KP4	Cytosolic non-specific dipeptidase OS=Homo sapiens GN=CNDP2 PE=1 SV=2 - [CNDP2_HUMAN]	864.89	41.68	1	13	13	18	475	52.8449	5.97314
P54652	Heat shock-related 70 kDa protein 2 OS=Homo sapiens GN=HSPA2 PE=1 SV=1 - [HSP72_HUMAN]	863.98	20.34	1	3	14	19	639	69.9779	5.74463
P01892	HLA class I histocompatibility antigen, A-2 alpha chain OS=Homo sapiens GN=HLA-A PE=1 SV=1 - [1A02_HUMAN]	859.48	48.22	7	5	13	20	365	40.8962	6.99072
Q9Y696	Chloride intracellular channel protein 4 OS=Homo sapiens GN=CLIC4 PE=1 SV=4 - [CLIC4_HUMAN]	859.12	58.5	1	12	12	21	253	28.7537	5.59229
P62937	Peptidyl-prolyl cis-trans isomerase A OS=Homo sapiens GN=PPIA PE=1 SV=2 - [PPIA_HUMAN]	858.01	70.91	8	10	11	21	165	18.0009	7.81104
O94832	Unconventional myosin-Id OS=Homo sapiens GN=MYO1D PE=1 SV=2 - [MYO1D_HUMAN]	855.88	21.67	2	16	16	21	1006	116.129	9.39307
P84077	ADP-ribosylation factor 1 OS=Homo sapiens GN=ARF1 PE=1 SV=2 - [ARF1_HUMAN]	855.41	79.01	2	7	11	26	181	20.6837	6.80029
Q10567	AP-1 complex subunit beta-1 OS=Homo sapiens GN=AP1B1 PE=1 SV=2 - [AP1B1_HUMAN]	850.71	26.34	1	8	16	19	949	104.57	5.05908
P17858	6-phosphofructokinase, liver type OS=Homo sapiens GN=PFKL PE=1 SV=6 - [K6PL_HUMAN]	848.31	21.67	1	9	11	15	780	84.9642	7.50342
P07237	Protein disulfide-isomerase OS=Homo sapiens GN=P4HB PE=1 SV=3 - [PDIA1_HUMAN]	846.48	33.46	1	11	11	17	508	57.0807	4.86865
P27348	14-3-3 protein theta OS=Homo sapiens GN=YWHAQ PE=1 SV=1 - [1433T_HUMAN]	843.99	42.04	2	5	10	21	245	27.7468	4.77979
P47895	Aldehyde dehydrogenase family 1 member A3 OS=Homo sapiens GN=ALDH1A3 PE=1 SV=2 - [AL1A3_HUMAN]	842.61	42.38	1	12	12	18	512	56.0728	7.25439
P36871	Phosphoglucomutase-1 OS=Homo sapiens GN=PGM1 PE=1 SV=3 - [PGM1_HUMAN]	839.26	36.65	1	13	13	15	562	61.4105	6.75635
O43175	D-3-phosphoglycerate dehydrogenase OS=Homo sapiens GN=PHGDH PE=1 SV=4 - [SERA_HUMAN]	836.13	38.46	1	13	13	21	533	56.6144	6.7124
Q9H223	EH domain-containing protein 4 OS=Homo sapiens GN=EHD4 PE=1 SV=1 - [EHD4_HUMAN]	833.96	45.66	1	13	15	15	541	61.1365	6.75635
P02786	Transferrin receptor protein 1 OS=Homo sapiens GN=TFRC PE=1 SV=2 - [TFR1_HUMAN]	821.68	25.79	1	15	15	19	760	84.8179	6.60986
P22234	Multifunctional protein ADE2 OS=Homo sapiens GN=PAICS PE=1 SV=3 - [PUR6_HUMAN]	819.82	48.94	1	14	14	19	425	47.0491	7.2251
P60174	Triosephosphate isomerase OS=Homo sapiens GN=TPI1 PE=1 SV=3 - [TPIS_HUMAN]	811.96	60.14	1	13	13	19	286	30.7717	5.92236
P22392	Nucleoside diphosphate kinase B OS=Homo sapiens GN=NME2 PE=1 SV=1 - [NDKB_HUMAN]	810.44	47.37	2	2	7	21	152	17.2869	8.41162
P27105	Erythrocyte band 7 integral membrane protein OS=Homo sapiens GN=STOM PE=1 SV=3 - [STOM_HUMAN]	802.09	51.74	1	10	10	18	288	31.7107	7.88428
P61158	Actin-related protein 3 OS=Homo sapiens GN=ACTR3 PE=1 SV=3 - [ARP3_HUMAN]	800.2	60.05	3	15	15	24	418	47.341	5.88428
O60506	Heterogeneous nuclear ribonucleoprotein Q OS=Homo sapiens GN=SYNCRIP PE=1 SV=2 - [HNRPQ_HUMAN]	797.38	35.47	1	12	17	19	623	69.5596	8.5874
P31150	Rab GDP dissociation inhibitor alpha OS=Homo sapiens GN=GDI1 PE=1 SV=2 - [GDIA_HUMAN]	796.52	32.89	1	5	11	14	447	50.5501	5.13525
Q8WUM4	Programmed cell death 6-interacting protein OS=Homo sapiens GN=PDCD6IP PE=1 SV=1 - [PDC6I_HUMAN]	784.6	24.42	1	15	15	17	868	95.9631	6.52197
Q9Y265	RuvB-like 1 OS=Homo sapiens GN=RUVBL1 PE=1 SV=1 - [RUVB1_HUMAN]	784.2	44.3	1	14	14	18	456	50.1963	6.41748
P61764	Syntaxin-binding protein 1 OS=Homo sapiens GN=STXBP1 PE=1 SV=1 - [STXB1_HUMAN]	782.46	30.47	1	14	14	19	594	67.5259	6.96143
Q14240	Eukaryotic initiation factor 4A-II OS=Homo sapiens GN=EIF4A2 PE=1 SV=2 - [IF4A2_HUMAN]	780.89	35.87	1	4	11	15	407	46.3728	5.47803
O94973	AP-2 complex subunit alpha-2 OS=Homo sapiens GN=AP2A2 PE=1 SV=2 - [AP2A2_HUMAN]	777.7	27.05	1	10	16	18	939	103.895	6.96143
Q9UQ80	Proliferation-associated protein 2G4 OS=Homo sapiens GN=PA2G4 PE=1 SV=3 - [PA2G4_HUMAN]	777.59	28.68	1	9	9	18	394	43.7592	6.55127
P26006	Integrin alpha-3 OS=Homo sapiens GN=ITGA3 PE=1 SV=5 - [ITA3_HUMAN]	765.48	18.93	1	13	13	19	1051	116.538	6.771
Q9H4A4	Aminopeptidase B OS=Homo sapiens GN=RNPEP PE=1 SV=2 - [AMPB_HUMAN]	764.93	34.46	1	14	14	16	650	72.5495	5.74463
Q9BSJ8	Extended synaptotagmin-1 OS=Homo sapiens GN=ESYT1 PE=1 SV=1 - [ESYT1_HUMAN]	763.6	19.93	1	13	13	16	1104	122.78	5.8335
Q15019	Septin-2 OS=Homo sapiens GN=SEPT2 PE=1 SV=1 - [SEPT2_HUMAN]	759.02	44.32	1	10	10	19	361	41.4613	6.59521
Q12913	Receptor-type tyrosine-protein phosphatase eta OS=Homo sapiens GN=PTPRJ PE=1 SV=3 - [PTPRJ_HUMAN]	758.58	18.77	1	16	16	17	1337	145.851	5.57959
Q7L576	Cytoplasmic FMR1-interacting protein 1 OS=Homo sapiens GN=CYFIP1 PE=1 SV=1 - [CYFP1_HUMAN]	751.89	15.08	2	14	14	15	1253	145.089	6.90283
P52907	F-actin-capping protein subunit alpha-1 OS=Homo sapiens GN=CAPZA1 PE=1 SV=3 - [CAZA1_HUMAN]	747.85	45.45	1	5	8	12	286	32.9023	5.69385
P15559	NAD(P)H dehydrogenase [quinone] 1 OS=Homo sapiens GN=NQO1 PE=1 SV=1 - [NQO1_HUMAN]	746.83	37.59	1	11	11	17	274	30.848	8.88037
O95782	AP-2 complex subunit alpha-1 OS=Homo sapiens GN=AP2A1 PE=1 SV=3 - [AP2A1_HUMAN]	741.95	22.72	1	10	16	19	977	107.478	7.03467
P23526	Adenosylhomocysteinase OS=Homo sapiens GN=AHCY PE=1 SV=4 - [SAHH_HUMAN]	740.64	27.78	1	10	10	16	432	47.6852	6.34131
P05362	Intercellular adhesion molecule 1 OS=Homo sapiens GN=ICAM1 PE=1 SV=2 - [ICAM1_HUMAN]	739.31	28.2	1	11	11	14	532	57.789	7.98682
P25705	ATP synthase subunit alpha, mitochondrial OS=Homo sapiens GN=ATP5A1 PE=1 SV=1 - [ATPA_HUMAN]	735.37	23.51	1	8	8	11	553	59.7136	9.12939
Q9UIW2	Plexin-A1 OS=Homo sapiens GN=PLXNA1 PE=1 SV=3 - [PLXA1_HUMAN]	730.98	12.61	2	15	15	17	1896	210.933	6.91748
Q9Y678	Coatomer subunit gamma OS=Homo sapiens GN=COPG PE=1 SV=1 - [COPG_HUMAN]	730.28	27.12	1	13	14	15	874	97.6555	5.46533
Q8TEX9	Importin-4 OS=Homo sapiens GN=IPO4 PE=1 SV=2 - [IPO4_HUMAN]	727.08	23.96	1	15	15	18	1081	118.64	4.95752
Q9BZQ8	Protein Niban OS=Homo sapiens GN=FAM129A PE=1 SV=1 - [NIBAN_HUMAN]	727.08	19.5	1	13	13	18	928	103.07	4.77979
P30041	Peroxiredoxin-6 OS=Homo sapiens GN=PRDX6 PE=1 SV=3 - [PRDX6_HUMAN]	726.23	52.23	1	10	10	13	224	25.0192	6.37939
O75955	Flotillin-1 OS=Homo sapiens GN=FLOT1 PE=1 SV=3 - [FLOT1_HUMAN]	721.61	32.08	1	10	10	15	427	47.3256	7.48877
P62834	Ras-related protein Rap-1A OS=Homo sapiens GN=RAP1A PE=1 SV=1 - [RAP1A_HUMAN]	721.14	64.13	1	3	8	14	184	20.9737	6.66846
P05106	Integrin beta-3 OS=Homo sapiens GN=ITGB3 PE=1 SV=2 - [ITB3_HUMAN]	716.05	28.68	1	15	15	17	788	87.0004	5.23682
P53618	Coatomer subunit beta OS=Homo sapiens GN=COPB1 PE=1 SV=3 - [COPB_HUMAN]	713.66	19.41	1	13	13	16	953	107.074	6.04932
Q9P265	Disco-interacting protein 2 homolog B OS=Homo sapiens GN=DIP2B PE=1 SV=3 - [DIP2B_HUMAN]	705.53	13.52	1	14	14	16	1576	171.382	8.08936
P61224	Ras-related protein Rap-1b OS=Homo sapiens GN=RAP1B PE=1 SV=1 - [RAP1B_HUMAN]	704.82	65.22	2	4	9	16	184	20.8116	5.78271
Q9P2J5	Leucine--tRNA ligase, cytoplasmic OS=Homo sapiens GN=LARS PE=1 SV=2 - [SYLC_HUMAN]	700.79	18.88	1	15	15	17	1176	134.379	7.29834
Q9Y4L1	Hypoxia up-regulated protein 1 OS=Homo sapiens GN=HYOU1 PE=1 SV=1 - [HYOU1_HUMAN]	699.51	19.72	1	11	11	14	999	111.266	5.22412
Q14344	Guanine nucleotide-binding protein subunit alpha-13 OS=Homo sapiens GN=GNA13 PE=1 SV=2 - [GNA13_HUMAN]	695.81	40.32	5	11	12	18	377	44.0217	8.00146
P04271	Protein S100-B OS=Homo sapiens GN=S100B PE=1 SV=2 - [S100B_HUMAN]	695.72	45.65	1	4	4	14	92	10.7061	4.58936
P18669	Phosphoglycerate mutase 1 OS=Homo sapiens GN=PGAM1 PE=1 SV=2 - [PGAM1_HUMAN]	693.92	64.57	3	11	11	17	254	28.7858	7.18115
O60488	Long-chain-fatty-acid--CoA ligase 4 OS=Homo sapiens GN=ACSL4 PE=1 SV=2 - [ACSL4_HUMAN]	688.72	34.32	1	13	15	20	711	79.1367	8.38232
A0FGR8	Extended synaptotagmin-2 OS=Homo sapiens GN=ESYT2 PE=1 SV=1 - [ESYT2_HUMAN]	685.64	16.83	1	9	9	12	921	102.294	9.26123
O75369	Filamin-B OS=Homo sapiens GN=FLNB PE=1 SV=2 - [FLNB_HUMAN]	684.98	5.69	1	6	11	17	2602	277.99	5.73193
P24821	Tenascin OS=Homo sapiens GN=TNC PE=1 SV=3 - [TENA_HUMAN]	675.9	8.63	1	10	10	14	2201	240.7	4.89404
P61160	Actin-related protein 2 OS=Homo sapiens GN=ACTR2 PE=1 SV=1 - [ARP2_HUMAN]	674.76	38.83	1	8	9	14	394	44.7322	6.7417
Q04637	Eukaryotic translation initiation factor 4 gamma 1 OS=Homo sapiens GN=EIF4G1 PE=1 SV=4 - [IF4G1_HUMAN]	672.01	7.82	2	10	10	13	1599	175.382	5.32568
P29992	Guanine nucleotide-binding protein subunit alpha-11 OS=Homo sapiens GN=GNA11 PE=1 SV=2 - [GNA11_HUMAN]	671.78	47.63	2	7	12	16	359	42.0965	5.69385
Q96QK1	Vacuolar protein sorting-associated protein 35 OS=Homo sapiens GN=VPS35 PE=1 SV=2 - [VPS35_HUMAN]	671.03	23.62	1	13	13	16	796	91.6489	5.49072
Q15046	Lysine--tRNA ligase OS=Homo sapiens GN=KARS PE=1 SV=3 - [SYK_HUMAN]	663.45	34.34	1	14	14	18	597	68.0046	6.354
P43034	Platelet-activating factor acetylhydrolase IB subunit alpha OS=Homo sapiens GN=PAFAH1B1 PE=1 SV=2 - [LIS1_HUMAN]	660.99	32.68	1	9	9	16	410	46.6082	7.37158
O15144	Actin-related protein 2/3 complex subunit 2 OS=Homo sapiens GN=ARPC2 PE=1 SV=1 - [ARPC2_HUMAN]	657.84	42.33	1	7	7	16	300	34.3115	7.35693
P52292	Importin subunit alpha-2 OS=Homo sapiens GN=KPNA2 PE=1 SV=1 - [IMA2_HUMAN]	654.72	32.14	2	10	10	12	529	57.8259	5.40186
O14980	Exportin-1 OS=Homo sapiens GN=XPO1 PE=1 SV=1 - [XPO1_HUMAN]	653.3	16.71	1	12	12	15	1071	123.306	6.06201
Q9UNM6	26S proteasome non-ATPase regulatory subunit 13 OS=Homo sapiens GN=PSMD13 PE=1 SV=2 - [PSD13_HUMAN]	650.27	38.3	1	10	10	12	376	42.9181	5.80811
P26641	Elongation factor 1-gamma OS=Homo sapiens GN=EEF1G PE=1 SV=3 - [EF1G_HUMAN]	650	42.56	1	13	13	17	437	50.0871	6.66846
P40926	Malate dehydrogenase, mitochondrial OS=Homo sapiens GN=MDH2 PE=1 SV=3 - [MDHM_HUMAN]	648.47	39.64	1	9	9	12	338	35.4807	8.67529
P61106	Ras-related protein Rab-14 OS=Homo sapiens GN=RAB14 PE=1 SV=4 - [RAB14_HUMAN]	647.84	69.77	9	10	11	13	215	23.8819	6.21436
Q16181	Septin-7 OS=Homo sapiens GN=SEPT7 PE=1 SV=2 - [SEPT7_HUMAN]	647.59	27	2	7	8	13	437	50.648	8.63135
Q7L2H7	Eukaryotic translation initiation factor 3 subunit M OS=Homo sapiens GN=EIF3M PE=1 SV=1 - [EIF3M_HUMAN]	645.86	39.04	1	9	9	14	374	42.4758	5.63037
O43852	Calumenin OS=Homo sapiens GN=CALU PE=1 SV=2 - [CALU_HUMAN]	643.84	52.7	1	11	11	14	315	37.0835	4.64014
P29692	Elongation factor 1-delta OS=Homo sapiens GN=EEF1D PE=1 SV=5 - [EF1D_HUMAN]	643.59	50.53	1	8	10	12	281	31.1028	5.0083
Q9UHD8	Septin-9 OS=Homo sapiens GN=SEPT9 PE=1 SV=2 - [SEPT9_HUMAN]	643.01	30.03	1	13	13	17	586	65.3608	8.96826
Q9ULV4	Coronin-1C OS=Homo sapiens GN=CORO1C PE=1 SV=1 - [COR1C_HUMAN]	642.5	25.11	1	9	9	12	474	53.2151	7.07861
P36873	Serine/threonine-protein phosphatase PP1-gamma catalytic subunit OS=Homo sapiens GN=PPP1CC PE=1 SV=1 - [PP1G_HUMAN]	641.7	33.13	1	1	7	12	323	36.9597	6.53662
P62136	Serine/threonine-protein phosphatase PP1-alpha catalytic subunit OS=Homo sapiens GN=PPP1CA PE=1 SV=1 - [PP1A_HUMAN]	638.76	38.18	1	1	7	12	330	37.4878	6.32861
P47897	Glutamine--tRNA ligase OS=Homo sapiens GN=QARS PE=1 SV=1 - [SYQ_HUMAN]	637.78	27.74	1	13	13	16	775	87.7429	7.15186
P51149	Ras-related protein Rab-7a OS=Homo sapiens GN=RAB7A PE=1 SV=1 - [RAB7A_HUMAN]	637.59	63.77	1	10	10	13	207	23.4748	6.69775
P49591	Serine--tRNA ligase, cytoplasmic OS=Homo sapiens GN=SARS PE=1 SV=3 - [SYSC_HUMAN]	631.55	24.51	1	8	8	13	514	58.7401	6.43018
Q02790	Peptidyl-prolyl cis-trans isomerase FKBP4 OS=Homo sapiens GN=FKBP4 PE=1 SV=3 - [FKBP4_HUMAN]	630.02	30.94	1	9	9	13	459	51.7721	5.42725
Q99829	Copine-1 OS=Homo sapiens GN=CPNE1 PE=1 SV=1 - [CPNE1_HUMAN]	626.86	31.1	1	10	10	15	537	59.0215	5.8335
Q86UX7	Fermitin family homolog 3 OS=Homo sapiens GN=FERMT3 PE=1 SV=1 - [URP2_HUMAN]	626.45	23.84	1	10	10	13	667	75.905	6.97607
Q9Y230	RuvB-like 2 OS=Homo sapiens GN=RUVBL2 PE=1 SV=3 - [RUVB2_HUMAN]	623.19	30.45	1	9	9	12	463	51.1246	5.64307
Q9Y2J2	Band 4.1-like protein 3 OS=Homo sapiens GN=EPB41L3 PE=1 SV=2 - [E41L3_HUMAN]	619.25	11.78	2	8	9	13	1087	120.603	5.18604
P67936	Tropomyosin alpha-4 chain OS=Homo sapiens GN=TPM4 PE=1 SV=3 - [TPM4_HUMAN]	618.03	38.31	2	7	11	19	248	28.5045	4.69092
P45974	Ubiquitin carboxyl-terminal hydrolase 5 OS=Homo sapiens GN=USP5 PE=1 SV=2 - [UBP5_HUMAN]	616.49	27.51	1	11	12	16	858	95.7253	5.03369
Q9Y262	Eukaryotic translation initiation factor 3 subunit L OS=Homo sapiens GN=EIF3L PE=1 SV=1 - [EIF3L_HUMAN]	615.65	26.6	1	10	10	12	564	66.6844	6.34131
Q9Y2A7	Nck-associated protein 1 OS=Homo sapiens GN=NCKAP1 PE=1 SV=1 - [NCKP1_HUMAN]	614.79	18.35	1	12	12	13	1128	128.707	6.62451
P11908	Ribose-phosphate pyrophosphokinase 2 OS=Homo sapiens GN=PRPS2 PE=1 SV=2 - [PRPS2_HUMAN]	614.56	33.65	1	2	7	12	318	34.747	6.60986
P30101	Protein disulfide-isomerase A3 OS=Homo sapiens GN=PDIA3 PE=1 SV=4 - [PDIA3_HUMAN]	614.24	34.46	1	12	12	15	505	56.7468	6.354
Q14203	Dynactin subunit 1 OS=Homo sapiens GN=DCTN1 PE=1 SV=3 - [DCTN1_HUMAN]	613.66	13.54	1	10	10	13	1278	141.607	5.80811
P07858	Cathepsin B OS=Homo sapiens GN=CTSB PE=1 SV=3 - [CATB_HUMAN]	612.22	17.99	1	4	4	18	339	37.7968	6.30322
P30520	Adenylosuccinate synthetase isozyme 2 OS=Homo sapiens GN=ADSS PE=1 SV=3 - [PURA2_HUMAN]	610.85	32.02	1	10	10	13	456	50.0658	6.55127
O00232	26S proteasome non-ATPase regulatory subunit 12 OS=Homo sapiens GN=PSMD12 PE=1 SV=3 - [PSD12_HUMAN]	609.34	31.14	1	9	9	11	456	52.8706	7.6499
P48147	Prolyl endopeptidase OS=Homo sapiens GN=PREP PE=1 SV=2 - [PPCE_HUMAN]	608.82	26.2	1	11	12	12	710	80.648	5.85889
P16615	Sarcoplasmic/endoplasmic reticulum calcium ATPase 2 OS=Homo sapiens GN=ATP2A2 PE=1 SV=1 - [AT2A2_HUMAN]	608.17	13.72	3	9	9	11	1042	114.683	5.33838
P27797	Calreticulin OS=Homo sapiens GN=CALR PE=1 SV=1 - [CALR_HUMAN]	607.19	51.56	1	12	12	15	417	48.1118	4.43701
P13667	Protein disulfide-isomerase A4 OS=Homo sapiens GN=PDIA4 PE=1 SV=2 - [PDIA4_HUMAN]	606.81	25.43	1	13	13	17	645	72.887	5.07178
P61247	40S ribosomal protein S3a OS=Homo sapiens GN=RPS3A PE=1 SV=2 - [RS3A_HUMAN]	606.23	29.17	1	6	6	11	264	29.9257	9.72998
P62140	Serine/threonine-protein phosphatase PP1-beta catalytic subunit OS=Homo sapiens GN=PPP1CB PE=1 SV=3 - [PP1B_HUMAN]	604.86	39.14	1	2	7	12	327	37.1626	6.18896
O94919	Endonuclease domain-containing 1 protein OS=Homo sapiens GN=ENDOD1 PE=1 SV=2 - [ENDD1_HUMAN]	603.01	30.4	1	10	10	11	500	54.9813	5.70654
P12955	Xaa-Pro dipeptidase OS=Homo sapiens GN=PEPD PE=1 SV=3 - [PEPD_HUMAN]	602.27	33.87	1	9	9	14	493	54.5129	5.99854
Q969P0	Immunoglobulin superfamily member 8 OS=Homo sapiens GN=IGSF8 PE=1 SV=1 - [IGSF8_HUMAN]	601.63	15.5	1	6	6	9	613	64.9935	8.00146
P13693	Translationally-controlled tumor protein OS=Homo sapiens GN=TPT1 PE=1 SV=1 - [TCTP_HUMAN]	599.6	70.35	2	6	6	14	172	19.5826	4.93213
P23396	40S ribosomal protein S3 OS=Homo sapiens GN=RPS3 PE=1 SV=2 - [RS3_HUMAN]	599.47	58.44	1	13	14	17	243	26.6714	9.65674
Q9Y4F1	FERM, RhoGEF and pleckstrin domain-containing protein 1 OS=Homo sapiens GN=FARP1 PE=1 SV=1 - [FARP1_HUMAN]	599.21	11.1	1	8	8	10	1045	118.559	8.14795
O75131	Copine-3 OS=Homo sapiens GN=CPNE3 PE=1 SV=1 - [CPNE3_HUMAN]	595.97	26.82	7	9	10	11	537	60.0921	5.84619
P09211	Glutathione S-transferase P OS=Homo sapiens GN=GSTP1 PE=1 SV=2 - [GSTP1_HUMAN]	594.91	52.38	1	8	8	10	210	23.341	5.64307
P02545	Prelamin-A/C OS=Homo sapiens GN=LMNA PE=1 SV=1 - [LMNA_HUMAN]	594.89	18.98	1	10	10	12	664	74.0947	7.02002
Q15084	Protein disulfide-isomerase A6 OS=Homo sapiens GN=PDIA6 PE=1 SV=1 - [PDIA6_HUMAN]	593.38	26.82	1	7	7	10	440	48.0913	5.08447
P0CW22	40S ribosomal protein S17-like OS=Homo sapiens GN=RPS17L PE=3 SV=1 - [RS17L_HUMAN]	593.22	57.78	1	6	6	13	135	15.5404	9.84717
Q07954	Prolow-density lipoprotein receptor-related protein 1 OS=Homo sapiens GN=LRP1 PE=1 SV=2 - [LRP1_HUMAN]	592.23	4.09	1	12	12	12	4544	504.276	5.38916
O15143	Actin-related protein 2/3 complex subunit 1B OS=Homo sapiens GN=ARPC1B PE=1 SV=3 - [ARC1B_HUMAN]	590.59	32.53	1	7	8	11	372	40.9234	8.35303
P16152	Carbonyl reductase [NADPH] 1 OS=Homo sapiens GN=CBR1 PE=1 SV=3 - [CBR1_HUMAN]	588.84	54.15	1	8	10	13	277	30.3559	8.32373
Q9H0U4	Ras-related protein Rab-1B OS=Homo sapiens GN=RAB1B PE=1 SV=1 - [RAB1B_HUMAN]	587.64	44.28	11	3	8	14	201	22.1572	5.73193
Q9Y6M5	Zinc transporter 1 OS=Homo sapiens GN=SLC30A1 PE=1 SV=3 - [ZNT1_HUMAN]	586.51	26.23	1	7	7	11	507	55.2641	6.48096
P36578	60S ribosomal protein L4 OS=Homo sapiens GN=RPL4 PE=1 SV=5 - [RL4_HUMAN]	585.65	29.98	1	11	11	14	427	47.6674	11.063
Q06210	Glucosamine--fructose-6-phosphate aminotransferase [isomerizing] 1 OS=Homo sapiens GN=GFPT1 PE=1 SV=3 - [GFPT1_HUMAN]	584.17	23.18	2	11	11	13	699	78.7563	7.10791
P12931	Proto-oncogene tyrosine-protein kinase Src OS=Homo sapiens GN=SRC PE=1 SV=3 - [SRC_HUMAN]	581.98	27.05	1	7	8	9	536	59.797	7.41553
Q13596	Sorting nexin-1 OS=Homo sapiens GN=SNX1 PE=1 SV=3 - [SNX1_HUMAN]	581.8	18.39	1	7	8	12	522	59.0331	5.14795
P61225	Ras-related protein Rap-2b OS=Homo sapiens GN=RAP2B PE=1 SV=1 - [RAP2B_HUMAN]	578.24	61.75	1	4	8	10	183	20.4912	4.80518
P01111	GTPase NRas OS=Homo sapiens GN=NRAS PE=1 SV=1 - [RASN_HUMAN]	576.63	65.61	1	2	9	10	189	21.2155	5.17334
P67775	Serine/threonine-protein phosphatase 2A catalytic subunit alpha isoform OS=Homo sapiens GN=PPP2CA PE=1 SV=1 - [PP2AA_HUMAN]	574.65	53.72	2	8	9	11	309	35.5714	5.5415
Q92598	Heat shock protein 105 kDa OS=Homo sapiens GN=HSPH1 PE=1 SV=1 - [HS105_HUMAN]	572.06	18.07	1	10	11	12	858	96.8037	5.38916
P19105	Myosin regulatory light chain 12A OS=Homo sapiens GN=MYL12A PE=1 SV=2 - [ML12A_HUMAN]	566.54	39.18	3	6	6	12	171	19.7815	4.80518
Q99613	Eukaryotic translation initiation factor 3 subunit C OS=Homo sapiens GN=EIF3C PE=1 SV=1 - [EIF3C_HUMAN]	565.79	12.49	2	9	9	13	913	105.278	5.68115
P05386	60S acidic ribosomal protein P1 OS=Homo sapiens GN=RPLP1 PE=1 SV=1 - [RLA1_HUMAN]	565.79	37.72	1	1	2	11	114	11.5067	4.32275
P20039	HLA class II histocompatibility antigen, DRB1-11 beta chain OS=Homo sapiens GN=HLA-DRB1 PE=1 SV=1 - [2B1B_HUMAN]	563.91	23.31	4	1	4	12	266	30.141	7.18115
P13489	Ribonuclease inhibitor OS=Homo sapiens GN=RNH1 PE=1 SV=2 - [RINI_HUMAN]	563.9	36.44	1	8	8	9	461	49.9411	4.81787
O00560	Syntenin-1 OS=Homo sapiens GN=SDCBP PE=1 SV=1 - [SDCB1_HUMAN]	562.36	49.66	1	8	8	10	298	32.4239	7.53271
O00487	26S proteasome non-ATPase regulatory subunit 14 OS=Homo sapiens GN=PSMD14 PE=1 SV=1 - [PSDE_HUMAN]	558.74	35.16	1	5	5	8	310	34.5546	6.52197
P35606	Coatomer subunit beta' OS=Homo sapiens GN=COPB2 PE=1 SV=2 - [COPB2_HUMAN]	558.56	15.01	1	10	10	14	906	102.422	5.2749
P02649	Apolipoprotein E OS=Homo sapiens GN=APOE PE=1 SV=1 - [APOE_HUMAN]	556.23	32.18	1	8	8	9	317	36.1318	5.73193
Q16658	Fascin OS=Homo sapiens GN=FSCN1 PE=1 SV=3 - [FSCN1_HUMAN]	553.77	25.76	1	10	10	11	493	54.4961	7.23975
P50148	Guanine nucleotide-binding protein G(q) subunit alpha OS=Homo sapiens GN=GNAQ PE=1 SV=4 - [GNAQ_HUMAN]	549.46	39.28	1	5	10	12	359	42.1153	5.68115
O60313	Dynamin-like 120 kDa protein, mitochondrial OS=Homo sapiens GN=OPA1 PE=1 SV=3 - [OPA1_HUMAN]	543.29	11.46	1	7	7	11	960	111.561	7.86963
P09471	Guanine nucleotide-binding protein G(o) subunit alpha OS=Homo sapiens GN=GNAO1 PE=1 SV=4 - [GNAO_HUMAN]	541.33	19.21	5	3	5	10	354	40.0249	5.52881
P50454	Serpin H1 OS=Homo sapiens GN=SERPINH1 PE=1 SV=2 - [SERPH_HUMAN]	540.31	33.25	1	8	8	12	418	46.4112	8.68994
P54136	Arginine--tRNA ligase, cytoplasmic OS=Homo sapiens GN=RARS PE=1 SV=2 - [SYRC_HUMAN]	539.55	21.82	1	11	11	12	660	75.3309	6.68311
O00571	ATP-dependent RNA helicase DDX3X OS=Homo sapiens GN=DDX3X PE=1 SV=3 - [DDX3X_HUMAN]	538.27	19.03	2	8	9	12	662	73.198	7.18115
P28482	Mitogen-activated protein kinase 1 OS=Homo sapiens GN=MAPK1 PE=1 SV=3 - [MK01_HUMAN]	536.04	50.56	1	9	12	15	360	41.3632	6.97607
Q5T4S7	E3 ubiquitin-protein ligase UBR4 OS=Homo sapiens GN=UBR4 PE=1 SV=1 - [UBR4_HUMAN]	533.69	4.59	1	11	11	13	5183	573.476	6.03662
P08237	6-phosphofructokinase, muscle type OS=Homo sapiens GN=PFKM PE=1 SV=2 - [K6PF_HUMAN]	533.32	13.85	1	5	7	10	780	85.1284	7.98682
P11940	Polyadenylate-binding protein 1 OS=Homo sapiens GN=PABPC1 PE=1 SV=2 - [PABP1_HUMAN]	532.65	19.65	5	7	10	12	636	70.6259	9.49561
Q9Y6M7	Sodium bicarbonate cotransporter 3 OS=Homo sapiens GN=SLC4A7 PE=1 SV=2 - [S4A7_HUMAN]	532.24	15.65	2	12	12	16	1214	135.957	6.7124
P62701	40S ribosomal protein S4, X isoform OS=Homo sapiens GN=RPS4X PE=1 SV=2 - [RS4X_HUMAN]	527.57	42.59	3	10	10	14	263	29.5791	10.1548
Q14160	Protein scribble homolog OS=Homo sapiens GN=SCRIB PE=1 SV=4 - [SCRIB_HUMAN]	526.49	12.39	1	11	11	12	1630	174.778	5.07178
O00186	Syntaxin-binding protein 3 OS=Homo sapiens GN=STXBP3 PE=1 SV=2 - [STXB3_HUMAN]	524.91	33.45	1	12	12	14	592	67.7208	7.79639
P60981	Destrin OS=Homo sapiens GN=DSTN PE=1 SV=3 - [DEST_HUMAN]	524.3	59.39	1	9	10	14	165	18.4935	7.85498
P16070	CD44 antigen OS=Homo sapiens GN=CD44 PE=1 SV=3 - [CD44_HUMAN]	518.61	13.75	3	8	9	13	742	81.4874	5.32568
Q9Y617	Phosphoserine aminotransferase OS=Homo sapiens GN=PSAT1 PE=1 SV=2 - [SERC_HUMAN]	518.55	31.35	1	9	9	12	370	40.3968	7.66455
P35908	Keratin, type II cytoskeletal 2 epidermal OS=Homo sapiens GN=KRT2 PE=1 SV=2 - [K22E_HUMAN]	516.36	26.13	2	8	9	9	639	65.3932	8.00146
P30512	HLA class I histocompatibility antigen, A-29 alpha chain OS=Homo sapiens GN=HLA-A PE=2 SV=2 - [1A29_HUMAN]	512.55	29.86	5	2	7	12	365	40.8372	7.00537
P11233	Ras-related protein Ral-A OS=Homo sapiens GN=RALA PE=1 SV=1 - [RALA_HUMAN]	512.27	44.66	1	5	8	11	206	23.552	7.10791
Q86T65	Disheveled-associated activator of morphogenesis 2 OS=Homo sapiens GN=DAAM2 PE=2 SV=3 - [DAAM2_HUMAN]	511.16	12.27	2	9	9	10	1068	123.42	6.80029
P40925	Malate dehydrogenase, cytoplasmic OS=Homo sapiens GN=MDH1 PE=1 SV=4 - [MDHC_HUMAN]	509.72	33.23	1	7	7	11	334	36.403	7.35693
Q9H0H5	Rac GTPase-activating protein 1 OS=Homo sapiens GN=RACGAP1 PE=1 SV=1 - [RGAP1_HUMAN]	509.24	29.59	1	11	11	13	632	70.9818	8.88037
P07339	Cathepsin D OS=Homo sapiens GN=CTSD PE=1 SV=1 - [CATD_HUMAN]	508.6	28.88	1	9	9	11	412	44.5236	6.53662
Q14697	Neutral alpha-glucosidase AB OS=Homo sapiens GN=GANAB PE=1 SV=3 - [GANAB_HUMAN]	507.61	20.66	1	13	13	18	944	106.807	6.13818
P21359	Neurofibromin OS=Homo sapiens GN=NF1 PE=1 SV=2 - [NF1_HUMAN]	507.1	5.18	1	8	8	11	2839	319.168	7.38623
Q02878	60S ribosomal protein L6 OS=Homo sapiens GN=RPL6 PE=1 SV=3 - [RL6_HUMAN]	501.46	29.51	1	7	7	11	288	32.7076	10.5796
Q03154	Aminoacylase-1 OS=Homo sapiens GN=ACY1 PE=1 SV=1 - [ACY1_HUMAN]	499.86	39.71	1	8	8	11	408	45.856	6.17627
Q15758	Neutral amino acid transporter B(0) OS=Homo sapiens GN=SLC1A5 PE=1 SV=2 - [AAAT_HUMAN]	497.36	20.52	1	6	6	8	541	56.5623	5.47803
P23284	Peptidyl-prolyl cis-trans isomerase B OS=Homo sapiens GN=PPIB PE=1 SV=2 - [PPIB_HUMAN]	496.57	34.72	2	6	8	13	216	23.7275	9.40771
Q04917	14-3-3 protein eta OS=Homo sapiens GN=YWHAH PE=1 SV=4 - [1433F_HUMAN]	491.89	27.24	2	2	8	16	246	28.201	4.84326
O75116	Rho-associated protein kinase 2 OS=Homo sapiens GN=ROCK2 PE=1 SV=4 - [ROCK2_HUMAN]	491.3	12.9	1	10	12	13	1388	160.799	6.02393
O75874	Isocitrate dehydrogenase [NADP] cytoplasmic OS=Homo sapiens GN=IDH1 PE=1 SV=2 - [IDHC_HUMAN]	490.95	33.57	1	11	12	12	414	46.6295	7.00537
P63241	Eukaryotic translation initiation factor 5A-1 OS=Homo sapiens GN=EIF5A PE=1 SV=2 - [IF5A1_HUMAN]	490.53	42.21	3	5	5	11	154	16.8214	5.23682
P61026	Ras-related protein Rab-10 OS=Homo sapiens GN=RAB10 PE=1 SV=1 - [RAB10_HUMAN]	489.88	45	10	5	7	8	200	22.5266	8.38232
P47756	F-actin-capping protein subunit beta OS=Homo sapiens GN=CAPZB PE=1 SV=4 - [CAPZB_HUMAN]	486.96	39.71	1	9	9	11	277	31.3308	5.59229
P09382	Galectin-1 OS=Homo sapiens GN=LGALS1 PE=1 SV=2 - [LEG1_HUMAN]	485.79	51.11	1	5	5	8	135	14.7062	5.50342
Q92973	Transportin-1 OS=Homo sapiens GN=TNPO1 PE=1 SV=2 - [TNPO1_HUMAN]	485.52	14.14	1	7	9	10	898	102.289	4.98291
P46777	60S ribosomal protein L5 OS=Homo sapiens GN=RPL5 PE=1 SV=3 - [RL5_HUMAN]	483.78	28.96	1	5	5	12	297	34.3407	9.71533
Q9Y3F4	Serine-threonine kinase receptor-associated protein OS=Homo sapiens GN=STRAP PE=1 SV=1 - [STRAP_HUMAN]	483.46	39.14	1	9	9	10	350	38.414	5.12256
Q15286	Ras-related protein Rab-35 OS=Homo sapiens GN=RAB35 PE=1 SV=1 - [RAB35_HUMAN]	481.33	39.8	10	4	6	8	201	23.0108	8.29443
P17931	Galectin-3 OS=Homo sapiens GN=LGALS3 PE=1 SV=5 - [LEG3_HUMAN]	480.96	25.6	1	5	5	10	250	26.1361	8.55811
P06241	Tyrosine-protein kinase Fyn OS=Homo sapiens GN=FYN PE=1 SV=3 - [FYN_HUMAN]	477.45	23.84	1	6	7	11	537	60.7234	6.66846
O14556	Glyceraldehyde-3-phosphate dehydrogenase, testis-specific OS=Homo sapiens GN=GAPDHS PE=1 SV=2 - [G3PT_HUMAN]	476.13	28.92	1	6	7	8	408	44.4728	8.19189
P11717	Cation-independent mannose-6-phosphate receptor OS=Homo sapiens GN=IGF2R PE=1 SV=3 - [MPRI_HUMAN]	475.39	4.09	1	6	6	9	2491	274.199	5.93506
P52209	6-phosphogluconate dehydrogenase, decarboxylating OS=Homo sapiens GN=PGD PE=1 SV=3 - [6PGD_HUMAN]	473.94	23.19	1	7	7	10	483	53.106	7.2251
P42356	Phosphatidylinositol 4-kinase alpha OS=Homo sapiens GN=PI4KA PE=1 SV=4 - [PI4KA_HUMAN]	473.27	6.47	3	8	8	11	2102	236.678	7.06396
P62241	40S ribosomal protein S8 OS=Homo sapiens GN=RPS8 PE=1 SV=2 - [RS8_HUMAN]	471.15	50.96	1	10	10	13	208	24.1902	10.3159
P31948	Stress-induced-phosphoprotein 1 OS=Homo sapiens GN=STIP1 PE=1 SV=1 - [STIP1_HUMAN]	470.45	23.02	1	10	10	12	543	62.5994	6.80029
Q16555	Dihydropyrimidinase-related protein 2 OS=Homo sapiens GN=DPYSL2 PE=1 SV=1 - [DPYL2_HUMAN]	469.88	23.08	3	9	9	10	572	62.2546	6.37939
P07942	Laminin subunit beta-1 OS=Homo sapiens GN=LAMB1 PE=1 SV=2 - [LAMB1_HUMAN]	468.24	4.87	1	4	4	6	1786	197.909	4.94482
P27708	CAD protein OS=Homo sapiens GN=CAD PE=1 SV=3 - [PYR1_HUMAN]	465.62	8.4	1	12	12	12	2225	242.829	6.45557
P47755	F-actin-capping protein subunit alpha-2 OS=Homo sapiens GN=CAPZA2 PE=1 SV=3 - [CAZA2_HUMAN]	465.47	29.02	1	3	6	9	286	32.9286	5.84619
P11413	Glucose-6-phosphate 1-dehydrogenase OS=Homo sapiens GN=G6PD PE=1 SV=4 - [G6PD_HUMAN]	464.57	22.52	1	9	9	12	515	59.219	6.84424
Q86VI3	Ras GTPase-activating-like protein IQGAP3 OS=Homo sapiens GN=IQGAP3 PE=1 SV=2 - [IQGA3_HUMAN]	462.56	7.42	1	7	7	9	1631	184.584	7.6499
P11234	Ras-related protein Ral-B OS=Homo sapiens GN=RALB PE=1 SV=1 - [RALB_HUMAN]	462.42	43.2	1	3	6	10	206	23.3939	6.62451
O00410	Importin-5 OS=Homo sapiens GN=IPO5 PE=1 SV=4 - [IPO5_HUMAN]	460.69	14.86	2	9	9	10	1097	123.55	4.94482
P23470	Receptor-type tyrosine-protein phosphatase gamma OS=Homo sapiens GN=PTPRG PE=1 SV=4 - [PTPRG_HUMAN]	458.15	8.44	1	7	7	8	1445	161.901	6.41748
P55209	Nucleosome assembly protein 1-like 1 OS=Homo sapiens GN=NAP1L1 PE=1 SV=1 - [NP1L1_HUMAN]	457.62	32.23	1	6	7	10	391	45.3459	4.4624
P22626	Heterogeneous nuclear ribonucleoproteins A2/B1 OS=Homo sapiens GN=HNRNPA2B1 PE=1 SV=2 - [ROA2_HUMAN]	456.73	29.46	1	6	7	11	353	37.4067	8.95361
O43865	Putative adenosylhomocysteinase 2 OS=Homo sapiens GN=AHCYL1 PE=1 SV=2 - [SAHH2_HUMAN]	455.47	20.94	2	6	6	8	530	58.9134	6.88818
Q9NY33	Dipeptidyl peptidase 3 OS=Homo sapiens GN=DPP3 PE=1 SV=2 - [DPP3_HUMAN]	454.65	14.79	12	5	6	7	737	82.5378	5.09717
Q02952	A-kinase anchor protein 12 OS=Homo sapiens GN=AKAP12 PE=1 SV=4 - [AKA12_HUMAN]	452.63	7.69	1	7	7	9	1782	191.367	4.41162
P49189	4-trimethylaminobutyraldehyde dehydrogenase OS=Homo sapiens GN=ALDH9A1 PE=1 SV=3 - [AL9A1_HUMAN]	452.58	19.84	1	7	7	11	494	53.767	5.87158
Q9Y3L5	Ras-related protein Rap-2c OS=Homo sapiens GN=RAP2C PE=1 SV=1 - [RAP2C_HUMAN]	452.21	44.81	2	2	6	7	183	20.7314	4.94482
P20339	Ras-related protein Rab-5A OS=Homo sapiens GN=RAB5A PE=1 SV=2 - [RAB5A_HUMAN]	452.2	36.74	1	3	6	10	215	23.6438	8.14795
P43686	26S protease regulatory subunit 6B OS=Homo sapiens GN=PSMC4 PE=1 SV=2 - [PRS6B_HUMAN]	450	27.99	1	7	7	10	418	47.3365	5.21143
P56192	Methionine--tRNA ligase, cytoplasmic OS=Homo sapiens GN=MARS PE=1 SV=2 - [SYMC_HUMAN]	448.95	12.33	1	8	8	9	900	101.052	6.16357
P60953	Cell division control protein 42 homolog OS=Homo sapiens GN=CDC42 PE=1 SV=2 - [CDC42_HUMAN]	448.69	25.65	1	3	3	8	191	21.245	6.55127
Q93050	V-type proton ATPase 116 kDa subunit a isoform 1 OS=Homo sapiens GN=ATP6V0A1 PE=1 SV=3 - [VPP1_HUMAN]	447.22	16.49	1	9	9	11	837	96.3501	6.43018
P60900	Proteasome subunit alpha type-6 OS=Homo sapiens GN=PSMA6 PE=1 SV=1 - [PSA6_HUMAN]	446.38	26.02	1	5	5	9	246	27.3818	6.75635
P08243	Asparagine synthetase [glutamine-hydrolyzing] OS=Homo sapiens GN=ASNS PE=1 SV=4 - [ASNS_HUMAN]	445.24	23.35	1	8	8	9	561	64.3286	6.85889
P52788	Spermine synthase OS=Homo sapiens GN=SMS PE=1 SV=2 - [SPSY_HUMAN]	444.8	42.08	1	8	8	9	366	41.2418	5.021
P09972	Fructose-bisphosphate aldolase C OS=Homo sapiens GN=ALDOC PE=1 SV=2 - [ALDOC_HUMAN]	443.48	20.6	1	2	5	9	364	39.4312	6.87354
P35237	Serpin B6 OS=Homo sapiens GN=SERPINB6 PE=1 SV=3 - [SPB6_HUMAN]	441.76	26.06	1	7	7	8	376	42.5941	5.2749
P01112	GTPase HRas OS=Homo sapiens GN=HRAS PE=1 SV=1 - [RASH_HUMAN]	441.48	60.85	1	1	8	9	189	21.2846	5.31299
O60841	Eukaryotic translation initiation factor 5B OS=Homo sapiens GN=EIF5B PE=1 SV=4 - [IF2P_HUMAN]	441.42	14.43	1	10	10	12	1220	138.742	5.49072
O14617	AP-3 complex subunit delta-1 OS=Homo sapiens GN=AP3D1 PE=1 SV=1 - [AP3D1_HUMAN]	439.58	10.32	1	7	7	8	1153	130.076	8.48486
Q9UI12	V-type proton ATPase subunit H OS=Homo sapiens GN=ATP6V1H PE=1 SV=1 - [VATH_HUMAN]	439.22	23.81	1	7	7	8	483	55.8471	6.48096
Q15907	Ras-related protein Rab-11B OS=Homo sapiens GN=RAB11B PE=1 SV=4 - [RB11B_HUMAN]	437.16	40.37	2	7	7	9	218	24.4735	5.93506
P15880	40S ribosomal protein S2 OS=Homo sapiens GN=RPS2 PE=1 SV=2 - [RS2_HUMAN]	436.54	27.99	1	6	6	9	293	31.3046	10.2427
P98160	Basement membrane-specific heparan sulfate proteoglycan core protein OS=Homo sapiens GN=HSPG2 PE=1 SV=4 - [PGBM_HUMAN]	436.29	3.76	1	10	11	13	4391	468.532	6.50732
Q96CW1	AP-2 complex subunit mu OS=Homo sapiens GN=AP2M1 PE=1 SV=2 - [AP2M1_HUMAN]	435.76	28.51	1	8	9	12	435	49.623	9.53955
O00231	26S proteasome non-ATPase regulatory subunit 11 OS=Homo sapiens GN=PSMD11 PE=1 SV=3 - [PSD11_HUMAN]	434.6	33.65	1	10	10	14	422	47.434	6.48096
Q12765	Secernin-1 OS=Homo sapiens GN=SCRN1 PE=1 SV=2 - [SCRN1_HUMAN]	434.42	19.08	1	4	4	9	414	46.3525	4.75439
P00441	Superoxide dismutase [Cu-Zn] OS=Homo sapiens GN=SOD1 PE=1 SV=2 - [SODC_HUMAN]	434.01	49.35	1	4	4	8	154	15.9259	6.12549
Q16881	Thioredoxin reductase 1, cytoplasmic OS=Homo sapiens GN=TXNRD1 PE=1 SV=3 - [TRXR1_HUMAN]	433.75	20.18	2	8	8	9	649	70.8622	7.38623
O95819	Mitogen-activated protein kinase kinase kinase kinase 4 OS=Homo sapiens GN=MAP4K4 PE=1 SV=2 - [M4K4_HUMAN]	433.67	11.46	1	4	10	15	1239	142.013	7.45947
P56537	Eukaryotic translation initiation factor 6 OS=Homo sapiens GN=EIF6 PE=1 SV=1 - [IF6_HUMAN]	432.69	28.57	1	4	4	8	245	26.5822	4.67822
P27635	60S ribosomal protein L10 OS=Homo sapiens GN=RPL10 PE=1 SV=4 - [RL10_HUMAN]	432.52	24.3	2	4	4	7	214	24.5879	10.0815
Q86W92	Liprin-beta-1 OS=Homo sapiens GN=PPFIBP1 PE=1 SV=2 - [LIPB1_HUMAN]	432.09	10.29	1	8	8	10	1011	113.952	5.5542
P61586	Transforming protein RhoA OS=Homo sapiens GN=RHOA PE=1 SV=1 - [RHOA_HUMAN]	431.55	34.72	2	2	4	12	193	21.7541	6.1001
P60660	Myosin light polypeptide 6 OS=Homo sapiens GN=MYL6 PE=1 SV=2 - [MYL6_HUMAN]	430.84	47.68	4	7	7	12	151	16.9191	4.65283
P17812	CTP synthase 1 OS=Homo sapiens GN=CTPS PE=1 SV=2 - [PYRG1_HUMAN]	428.86	20.3	2	9	9	12	591	66.648	6.45557
P01116	GTPase KRas OS=Homo sapiens GN=KRAS PE=1 SV=1 - [RASK_HUMAN]	428.17	54.5	1	1	7	8	189	21.642	6.771
P30086	Phosphatidylethanolamine-binding protein 1 OS=Homo sapiens GN=PEBP1 PE=1 SV=3 - [PEBP1_HUMAN]	427.8	59.89	1	6	6	7	187	21.0437	7.53271
P14384	Carboxypeptidase M OS=Homo sapiens GN=CPM PE=1 SV=2 - [CBPM_HUMAN]	425.44	20.99	1	8	8	10	443	50.4815	7.35693
P13612	Integrin alpha-4 OS=Homo sapiens GN=ITGA4 PE=1 SV=3 - [ITA4_HUMAN]	424.84	11.05	1	9	9	11	1032	114.827	6.48096
Q15121	Astrocytic phosphoprotein PEA-15 OS=Homo sapiens GN=PEA15 PE=1 SV=2 - [PEA15_HUMAN]	423.38	36.92	1	4	4	8	130	15.0308	5.021
Q92614	Unconventional myosin-XVIIIa OS=Homo sapiens GN=MYO18A PE=1 SV=3 - [MY18A_HUMAN]	423.09	7.21	1	10	10	10	2054	232.971	6.30322
P28074	Proteasome subunit beta type-5 OS=Homo sapiens GN=PSMB5 PE=1 SV=3 - [PSB5_HUMAN]	422.89	24.33	1	4	4	6	263	28.4622	6.91748
Q9HD67	Unconventionnal myosin-X OS=Homo sapiens GN=MYO10 PE=1 SV=3 - [MYO10_HUMAN]	422	5.83	1	7	7	9	2058	237.198	6.21436
P09651	Heterogeneous nuclear ribonucleoprotein A1 OS=Homo sapiens GN=HNRNPA1 PE=1 SV=5 - [ROA1_HUMAN]	421.57	28.23	2	6	7	12	372	38.7231	9.12939
P07947	Tyrosine-protein kinase Yes OS=Homo sapiens GN=YES1 PE=1 SV=3 - [YES_HUMAN]	421.31	29.47	1	6	7	9	543	60.7625	6.7417
Q8NE71	ATP-binding cassette sub-family F member 1 OS=Homo sapiens GN=ABCF1 PE=1 SV=2 - [ABCF1_HUMAN]	421.12	12.31	1	8	8	10	845	95.8665	6.80029
P54709	Sodium/potassium-transporting ATPase subunit beta-3 OS=Homo sapiens GN=ATP1B3 PE=1 SV=1 - [AT1B3_HUMAN]	421.05	34.41	1	7	7	10	279	31.4921	8.35303
P20618	Proteasome subunit beta type-1 OS=Homo sapiens GN=PSMB1 PE=1 SV=2 - [PSB1_HUMAN]	420.45	46.06	1	7	7	9	241	26.4724	8.1333
P28066	Proteasome subunit alpha type-5 OS=Homo sapiens GN=PSMA5 PE=1 SV=3 - [PSA5_HUMAN]	418.93	26.14	1	4	4	6	241	26.3942	4.79248
P04080	Cystatin-B OS=Homo sapiens GN=CSTB PE=1 SV=2 - [CYTB_HUMAN]	416.72	70.41	1	4	4	8	98	11.1326	7.56201
P37802	Transgelin-2 OS=Homo sapiens GN=TAGLN2 PE=1 SV=3 - [TAGL2_HUMAN]	416.07	53.27	1	8	8	9	199	22.3772	8.25049
P13798	Acylamino-acid-releasing enzyme OS=Homo sapiens GN=APEH PE=1 SV=4 - [ACPH_HUMAN]	414.11	16.8	1	9	9	9	732	81.1726	5.47803
P08134	Rho-related GTP-binding protein RhoC OS=Homo sapiens GN=RHOC PE=1 SV=1 - [RHOC_HUMAN]	412.7	34.72	2	2	4	9	193	21.9923	6.58057
P60891	Ribose-phosphate pyrophosphokinase 1 OS=Homo sapiens GN=PRPS1 PE=1 SV=2 - [PRPS1_HUMAN]	412.47	26.1	2	1	6	10	318	34.8119	6.97607
Q8WWI5	Choline transporter-like protein 1 OS=Homo sapiens GN=SLC44A1 PE=1 SV=1 - [CTL1_HUMAN]	410.89	12.79	1	7	7	8	657	73.2533	8.60205
Q12979	Active breakpoint cluster region-related protein OS=Homo sapiens GN=ABR PE=2 SV=2 - [ABR_HUMAN]	410.74	16.3	2	9	9	10	859	97.5362	6.55127
P50443	Sulfate transporter OS=Homo sapiens GN=SLC26A2 PE=1 SV=2 - [S26A2_HUMAN]	410.64	12.04	1	6	6	15	739	81.6089	8.38232
O43390	Heterogeneous nuclear ribonucleoprotein R OS=Homo sapiens GN=HNRNPR PE=1 SV=1 - [HNRPR_HUMAN]	410.01	21.96	1	6	11	13	633	70.8993	8.1333
P05388	60S acidic ribosomal protein P0 OS=Homo sapiens GN=RPLP0 PE=1 SV=1 - [RLA0_HUMAN]	407.07	43.53	2	9	9	10	317	34.2518	5.97314
P10114	Ras-related protein Rap-2a OS=Homo sapiens GN=RAP2A PE=1 SV=1 - [RAP2A_HUMAN]	407.06	39.89	1	1	5	6	183	20.6023	4.81787
P11766	Alcohol dehydrogenase class-3 OS=Homo sapiens GN=ADH5 PE=1 SV=4 - [ADHX_HUMAN]	406.64	30.75	1	5	5	7	374	39.6984	7.48877
Q13177	Serine/threonine-protein kinase PAK 2 OS=Homo sapiens GN=PAK2 PE=1 SV=3 - [PAK2_HUMAN]	406.29	20.8	3	7	7	8	524	58.0059	5.96045
Q12965	Unconventional myosin-Ie OS=Homo sapiens GN=MYO1E PE=1 SV=2 - [MYO1E_HUMAN]	405.74	11.28	2	8	8	10	1108	126.982	8.92432
P21266	Glutathione S-transferase Mu 3 OS=Homo sapiens GN=GSTM3 PE=1 SV=3 - [GSTM3_HUMAN]	404.02	34.22	1	6	6	8	225	26.5421	5.5415
Q08211	ATP-dependent RNA helicase A OS=Homo sapiens GN=DHX9 PE=1 SV=4 - [DHX9_HUMAN]	402.8	10.31	1	10	10	13	1270	140.869	6.84424
Q99733	Nucleosome assembly protein 1-like 4 OS=Homo sapiens GN=NAP1L4 PE=1 SV=1 - [NP1L4_HUMAN]	401.78	32.53	1	7	8	10	375	42.7969	4.69092
P60033	CD81 antigen OS=Homo sapiens GN=CD81 PE=1 SV=1 - [CD81_HUMAN]	400.85	18.22	1	2	2	5	236	25.7921	5.2876
Q04446	1,4-alpha-glucan-branching enzyme OS=Homo sapiens GN=GBE1 PE=1 SV=3 - [GLGB_HUMAN]	399.63	23.93	1	9	9	10	702	80.4226	6.31592
O14908	PDZ domain-containing protein GIPC1 OS=Homo sapiens GN=GIPC1 PE=1 SV=2 - [GIPC1_HUMAN]	399.38	26.73	2	5	5	7	333	36.0267	6.27783
P19022	Cadherin-2 OS=Homo sapiens GN=CDH2 PE=1 SV=4 - [CADH2_HUMAN]	396.68	15.12	2	7	8	13	906	99.7473	4.80518
P35998	26S protease regulatory subunit 7 OS=Homo sapiens GN=PSMC2 PE=1 SV=3 - [PRS7_HUMAN]	396.33	22.86	1	8	8	8	433	48.6031	5.94775
Q9UKG1	DCC-interacting protein 13-alpha OS=Homo sapiens GN=APPL1 PE=1 SV=1 - [DP13A_HUMAN]	395.84	20.31	1	7	7	8	709	79.6136	5.41455
Q12846	Syntaxin-4 OS=Homo sapiens GN=STX4 PE=1 SV=2 - [STX4_HUMAN]	395.8	35.69	1	6	6	8	297	34.1589	6.27783
P11166	Solute carrier family 2, facilitated glucose transporter member 1 OS=Homo sapiens GN=SLC2A1 PE=1 SV=2 - [GTR1_HUMAN]	395.37	11.38	1	4	5	11	492	54.0485	8.71924
Q9Y281	Cofilin-2 OS=Homo sapiens GN=CFL2 PE=1 SV=1 - [COF2_HUMAN]	394.56	41.57	1	2	5	9	166	18.7249	7.88428
P50281	Matrix metalloproteinase-14 OS=Homo sapiens GN=MMP14 PE=1 SV=3 - [MMP14_HUMAN]	393.87	15.81	2	6	7	8	582	65.852	7.76709
P13010	X-ray repair cross-complementing protein 5 OS=Homo sapiens GN=XRCC5 PE=1 SV=3 - [XRCC5_HUMAN]	393.13	20.22	1	8	8	9	732	82.6523	5.80811
O14579	Coatomer subunit epsilon OS=Homo sapiens GN=COPE PE=1 SV=3 - [COPE_HUMAN]	392.28	30.19	1	5	5	7	308	34.4603	5.12256
Q92499	ATP-dependent RNA helicase DDX1 OS=Homo sapiens GN=DDX1 PE=1 SV=2 - [DDX1_HUMAN]	392.24	18.92	1	7	7	9	740	82.3798	7.2251
P62841	40S ribosomal protein S15 OS=Homo sapiens GN=RPS15 PE=1 SV=2 - [RS15_HUMAN]	392.23	46.9	1	3	3	10	145	17.0292	10.3892
O15554	Intermediate conductance calcium-activated potassium channel protein 4 OS=Homo sapiens GN=KCNN4 PE=1 SV=1 - [KCNN4_HUMAN]	391.67	11.94	1	5	5	8	427	47.6646	9.83252
P18084	Integrin beta-5 OS=Homo sapiens GN=ITGB5 PE=1 SV=1 - [ITB5_HUMAN]	390.1	9.39	1	5	5	7	799	87.9962	6.06201
P48637	Glutathione synthetase OS=Homo sapiens GN=GSS PE=1 SV=1 - [GSHB_HUMAN]	389.11	19.62	1	7	7	9	474	52.3523	5.92236
P19338	Nucleolin OS=Homo sapiens GN=NCL PE=1 SV=3 - [NUCL_HUMAN]	388.93	12.54	1	6	6	8	710	76.5684	4.70361
P10155	60 kDa SS-A/Ro ribonucleoprotein OS=Homo sapiens GN=TROVE2 PE=1 SV=2 - [RO60_HUMAN]	388.16	18.22	1	6	6	8	538	60.6312	8.03076
Q9Y6M1	Insulin-like growth factor 2 mRNA-binding protein 2 OS=Homo sapiens GN=IGF2BP2 PE=1 SV=2 - [IF2B2_HUMAN]	387.76	11.02	1	4	5	6	599	66.0806	8.45557
Q92888	Rho guanine nucleotide exchange factor 1 OS=Homo sapiens GN=ARHGEF1 PE=1 SV=2 - [ARHG1_HUMAN]	385.15	9.98	1	7	7	8	912	102.371	5.65576
Q9H0X4	Protein ITFG3 OS=Homo sapiens GN=ITFG3 PE=1 SV=1 - [ITFG3_HUMAN]	385.07	27.17	1	6	6	8	552	59.6221	6.27783
Q9NSD9	Phenylalanine--tRNA ligase beta subunit OS=Homo sapiens GN=FARSB PE=1 SV=3 - [SYFB_HUMAN]	384.39	22.41	1	10	10	11	589	66.0735	6.84424
P05387	60S acidic ribosomal protein P2 OS=Homo sapiens GN=RPLP2 PE=1 SV=1 - [RLA2_HUMAN]	383.57	84.35	1	4	5	6	115	11.6578	4.53857
O00764	Pyridoxal kinase OS=Homo sapiens GN=PDXK PE=1 SV=1 - [PDXK_HUMAN]	383.33	33.97	1	5	5	6	312	35.0799	6.12549
P28838	Cytosol aminopeptidase OS=Homo sapiens GN=LAP3 PE=1 SV=3 - [AMPL_HUMAN]	381.85	26.78	1	10	10	11	519	56.1308	7.92822
P62820	Ras-related protein Rab-1A OS=Homo sapiens GN=RAB1A PE=1 SV=3 - [RAB1A_HUMAN]	381.79	47.32	10	2	8	9	205	22.6634	6.21436
P40763	Signal transducer and activator of transcription 3 OS=Homo sapiens GN=STAT3 PE=1 SV=2 - [STAT3_HUMAN]	381.58	16.36	1	7	7	9	770	88.0114	6.30322
Q9Y6E0	Serine/threonine-protein kinase 24 OS=Homo sapiens GN=STK24 PE=1 SV=1 - [STK24_HUMAN]	381.53	21.67	1	5	7	9	443	49.2773	5.69385
Q15029	116 kDa U5 small nuclear ribonucleoprotein component OS=Homo sapiens GN=EFTUD2 PE=1 SV=1 - [U5S1_HUMAN]	378.77	10.91	1	7	7	8	972	109.366	4.99561
Q9NPH3	Interleukin-1 receptor accessory protein OS=Homo sapiens GN=IL1RAP PE=1 SV=2 - [IL1AP_HUMAN]	377.55	21.05	1	9	9	9	570	65.3767	8.11865
Q14699	Raftlin OS=Homo sapiens GN=RFTN1 PE=1 SV=4 - [RFTN1_HUMAN]	377.34	22.84	1	7	7	10	578	63.1065	5.66846
P38646	Stress-70 protein, mitochondrial OS=Homo sapiens GN=HSPA9 PE=1 SV=2 - [GRP75_HUMAN]	376.64	16.94	1	8	8	8	679	73.6348	6.16357
Q5VYK3	Proteasome-associated protein ECM29 homolog OS=Homo sapiens GN=ECM29 PE=1 SV=2 - [ECM29_HUMAN]	375.86	7.86	1	9	9	9	1845	204.16	7.12256
Q10588	ADP-ribosyl cyclase 2 OS=Homo sapiens GN=BST1 PE=1 SV=2 - [BST1_HUMAN]	374.43	15.09	1	3	3	6	318	35.7011	7.79639
P33176	Kinesin-1 heavy chain OS=Homo sapiens GN=KIF5B PE=1 SV=1 - [KINH_HUMAN]	373.29	11.32	3	6	6	7	963	109.617	6.50732
Q9H4M9	EH domain-containing protein 1 OS=Homo sapiens GN=EHD1 PE=1 SV=2 - [EHD1_HUMAN]	373.27	26.22	1	5	9	9	534	60.5887	6.82959
P52597	Heterogeneous nuclear ribonucleoprotein F OS=Homo sapiens GN=HNRNPF PE=1 SV=3 - [HNRPF_HUMAN]	372.41	15.9	1	3	4	7	415	45.6429	5.57959
P50995	Annexin A11 OS=Homo sapiens GN=ANXA11 PE=1 SV=1 - [ANX11_HUMAN]	372.14	17.62	1	6	6	8	505	54.3551	7.6499
Q15334	Lethal(2) giant larvae protein homolog 1 OS=Homo sapiens GN=LLGL1 PE=1 SV=3 - [L2GL1_HUMAN]	369.95	11.84	1	9	9	9	1064	115.346	6.29053
P06753	Tropomyosin alpha-3 chain OS=Homo sapiens GN=TPM3 PE=1 SV=2 - [TPM3_HUMAN]	369.56	21.4	1	3	9	13	285	32.9298	4.71631
P07384	Calpain-1 catalytic subunit OS=Homo sapiens GN=CAPN1 PE=1 SV=1 - [CAN1_HUMAN]	369.51	19.05	1	10	10	10	714	81.8382	5.66846
O00429	Dynamin-1-like protein OS=Homo sapiens GN=DNM1L PE=1 SV=2 - [DNM1L_HUMAN]	369.13	17.26	1	8	8	9	736	81.8261	6.81494
P17174	Aspartate aminotransferase, cytoplasmic OS=Homo sapiens GN=GOT1 PE=1 SV=3 - [AATC_HUMAN]	369.09	31.96	1	7	7	7	413	46.2185	7.00537
Q01105	Protein SET OS=Homo sapiens GN=SET PE=1 SV=3 - [SET_HUMAN]	368.88	43.45	2	6	6	9	290	33.4687	4.32275
P61019	Ras-related protein Rab-2A OS=Homo sapiens GN=RAB2A PE=1 SV=1 - [RAB2A_HUMAN]	368.03	46.23	2	9	9	11	212	23.5308	6.53662
P18085	ADP-ribosylation factor 4 OS=Homo sapiens GN=ARF4 PE=1 SV=3 - [ARF4_HUMAN]	367.98	55	1	5	8	10	180	20.4977	7.13721
P05198	Eukaryotic translation initiation factor 2 subunit 1 OS=Homo sapiens GN=EIF2S1 PE=1 SV=3 - [IF2A_HUMAN]	367.7	31.43	1	9	9	10	315	36.0894	5.08447
Q15075	Early endosome antigen 1 OS=Homo sapiens GN=EEA1 PE=1 SV=2 - [EEA1_HUMAN]	367.22	5.32	1	5	5	5	1411	162.367	5.68115
P30479	HLA class I histocompatibility antigen, B-41 alpha chain OS=Homo sapiens GN=HLA-B PE=1 SV=1 - [1B41_HUMAN]	366.74	21.82	23	0	6	9	362	40.5141	6.53662
P09417	Dihydropteridine reductase OS=Homo sapiens GN=QDPR PE=1 SV=2 - [DHPR_HUMAN]	366.44	48.77	1	7	7	7	244	25.773	7.37158
Q96FW1	Ubiquitin thioesterase OTUB1 OS=Homo sapiens GN=OTUB1 PE=1 SV=2 - [OTUB1_HUMAN]	365.65	29.89	1	6	6	9	271	31.2644	4.94482
Q15582	Transforming growth factor-beta-induced protein ig-h3 OS=Homo sapiens GN=TGFBI PE=1 SV=1 - [BGH3_HUMAN]	364.44	16.11	1	7	7	7	683	74.634	7.7085
O00154	Cytosolic acyl coenzyme A thioester hydrolase OS=Homo sapiens GN=ACOT7 PE=1 SV=3 - [BACH_HUMAN]	362.48	18.42	1	5	5	7	380	41.7693	8.54346
P61020	Ras-related protein Rab-5B OS=Homo sapiens GN=RAB5B PE=1 SV=1 - [RAB5B_HUMAN]	361.93	27.91	1	2	5	8	215	23.6919	8.1333
Q9BTW9	Tubulin-specific chaperone D OS=Homo sapiens GN=TBCD PE=1 SV=2 - [TBCD_HUMAN]	361.77	6.63	1	4	4	5	1192	132.515	6.18896
Q7Z6Z7	E3 ubiquitin-protein ligase HUWE1 OS=Homo sapiens GN=HUWE1 PE=1 SV=3 - [HUWE1_HUMAN]	361.51	2.61	1	6	6	6	4374	481.589	5.22412
O60861	Growth arrest-specific protein 7 OS=Homo sapiens GN=GAS7 PE=1 SV=3 - [GAS7_HUMAN]	361.05	15.97	1	5	5	7	476	54.3372	7.34229
P07741	Adenine phosphoribosyltransferase OS=Homo sapiens GN=APRT PE=1 SV=2 - [APT_HUMAN]	360.61	47.22	1	5	5	6	180	19.5954	6.02393
Q15365	Poly(rC)-binding protein 1 OS=Homo sapiens GN=PCBP1 PE=1 SV=2 - [PCBP1_HUMAN]	359.25	43.26	1	6	8	9	356	37.4739	7.09326
Q96BY6	Dedicator of cytokinesis protein 10 OS=Homo sapiens GN=DOCK10 PE=1 SV=3 - [DOC10_HUMAN]	359.23	4.85	1	6	6	8	2186	249.373	7.13721
P17980	26S protease regulatory subunit 6A OS=Homo sapiens GN=PSMC3 PE=1 SV=3 - [PRS6A_HUMAN]	358.35	32.12	1	8	8	9	439	49.1725	5.23682
P04632	Calpain small subunit 1 OS=Homo sapiens GN=CAPNS1 PE=1 SV=1 - [CPNS1_HUMAN]	357.34	31.34	1	5	5	7	268	28.2977	5.19873
Q13045	Protein flightless-1 homolog OS=Homo sapiens GN=FLII PE=1 SV=2 - [FLII_HUMAN]	355.69	9.93	1	9	9	9	1269	144.66	6.04932
Q9Y3I0	tRNA-splicing ligase RtcB homolog OS=Homo sapiens GN=C22orf28 PE=1 SV=1 - [RTCB_HUMAN]	354.07	20.59	1	9	9	10	505	55.1749	7.2251
Q16401	26S proteasome non-ATPase regulatory subunit 5 OS=Homo sapiens GN=PSMD5 PE=1 SV=3 - [PSMD5_HUMAN]	350.64	19.64	1	6	6	6	504	56.1604	5.47803
P30050	60S ribosomal protein L12 OS=Homo sapiens GN=RPL12 PE=1 SV=1 - [RL12_HUMAN]	350.08	45.45	1	5	5	6	165	17.8075	9.42236
P55884	Eukaryotic translation initiation factor 3 subunit B OS=Homo sapiens GN=EIF3B PE=1 SV=3 - [EIF3B_HUMAN]	349.59	20.02	1	10	10	13	814	92.4238	4.99561
Q04826	HLA class I histocompatibility antigen, B-40 alpha chain OS=Homo sapiens GN=HLA-B PE=1 SV=1 - [1B40_HUMAN]	349.08	21.82	22	0	6	9	362	40.4801	6.53662
Q92542	Nicastrin OS=Homo sapiens GN=NCSTN PE=1 SV=2 - [NICA_HUMAN]	348.94	14.39	1	7	7	8	709	78.3615	5.98584
P61221	ATP-binding cassette sub-family E member 1 OS=Homo sapiens GN=ABCE1 PE=1 SV=1 - [ABCE1_HUMAN]	348.91	21.2	1	8	8	9	599	67.271	8.33838
P10321	HLA class I histocompatibility antigen, Cw-7 alpha chain OS=Homo sapiens GN=HLA-C PE=1 SV=3 - [1C07_HUMAN]	348.5	25.41	2	1	6	7	366	40.6229	6.03662
Q13347	Eukaryotic translation initiation factor 3 subunit I OS=Homo sapiens GN=EIF3I PE=1 SV=1 - [EIF3I_HUMAN]	348.38	33.54	1	8	8	9	325	36.4786	5.64307
Q8IYI6	Exocyst complex component 8 OS=Homo sapiens GN=EXOC8 PE=1 SV=2 - [EXOC8_HUMAN]	348.04	11.86	1	5	5	8	725	81.7474	5.49072
Q12905	Interleukin enhancer-binding factor 2 OS=Homo sapiens GN=ILF2 PE=1 SV=2 - [ILF2_HUMAN]	347.96	31.54	1	7	7	7	390	43.0352	5.26221
Q31612	HLA class I histocompatibility antigen, B-73 alpha chain OS=Homo sapiens GN=HLA-B PE=1 SV=1 - [1B73_HUMAN]	347.78	25.62	2	0	6	7	363	40.4099	6.23975
P63220	40S ribosomal protein S21 OS=Homo sapiens GN=RPS21 PE=1 SV=1 - [RS21_HUMAN]	347.72	34.94	1	2	2	5	83	9.10557	8.49951
P62081	40S ribosomal protein S7 OS=Homo sapiens GN=RPS7 PE=1 SV=1 - [RS7_HUMAN]	347.33	42.27	1	5	5	11	194	22.1133	10.0962
P30419	Glycylpeptide N-tetradecanoyltransferase 1 OS=Homo sapiens GN=NMT1 PE=1 SV=2 - [NMT1_HUMAN]	346.43	17.94	2	5	5	7	496	56.7699	7.79639
O15484	Calpain-5 OS=Homo sapiens GN=CAPN5 PE=1 SV=2 - [CAN5_HUMAN]	345.87	8.91	1	4	4	6	640	73.1227	7.63525
Q9NQW6	Actin-binding protein anillin OS=Homo sapiens GN=ANLN PE=1 SV=2 - [ANLN_HUMAN]	345.83	10.85	1	8	8	9	1124	124.122	8.07471
P30566	Adenylosuccinate lyase OS=Homo sapiens GN=ADSL PE=1 SV=2 - [PUR8_HUMAN]	345.23	11.98	1	4	4	6	484	54.854	7.10791
Q6P9B6	TLD domain-containing protein 1 OS=Homo sapiens GN=TLDC1 PE=1 SV=2 - [TLDC1_HUMAN]	345.2	20.61	1	5	5	6	456	50.9611	6.23975
O00425	Insulin-like growth factor 2 mRNA-binding protein 3 OS=Homo sapiens GN=IGF2BP3 PE=1 SV=2 - [IF2B3_HUMAN]	343.24	13.64	1	5	6	9	579	63.6656	8.86572
Q9NUQ9	Protein FAM49B OS=Homo sapiens GN=FAM49B PE=1 SV=1 - [FA49B_HUMAN]	343.17	35.49	1	7	7	8	324	36.7246	6.06201
P08138	Tumor necrosis factor receptor superfamily member 16 OS=Homo sapiens GN=NGFR PE=1 SV=1 - [TNR16_HUMAN]	340.34	12.41	1	3	3	6	427	45.1543	4.70361
P15170	Eukaryotic peptide chain release factor GTP-binding subunit ERF3A OS=Homo sapiens GN=GSPT1 PE=1 SV=1 - [ERF3A_HUMAN]	339.68	15.03	2	5	5	7	499	55.7203	5.61768
P54577	Tyrosine--tRNA ligase, cytoplasmic OS=Homo sapiens GN=YARS PE=1 SV=4 - [SYYC_HUMAN]	337.78	20.08	1	8	8	9	528	59.1061	7.04932
P26012	Integrin beta-8 OS=Homo sapiens GN=ITGB8 PE=1 SV=1 - [ITB8_HUMAN]	337.51	10.66	1	6	6	9	769	85.5754	7.25439
P62424	60S ribosomal protein L7a OS=Homo sapiens GN=RPL7A PE=1 SV=2 - [RL7A_HUMAN]	336.48	24.81	1	7	7	8	266	29.977	10.6089
P61201	COP9 signalosome complex subunit 2 OS=Homo sapiens GN=COPS2 PE=1 SV=1 - [CSN2_HUMAN]	334.21	22.12	1	7	7	7	443	51.5641	5.52881
Q92900	Regulator of nonsense transcripts 1 OS=Homo sapiens GN=UPF1 PE=1 SV=2 - [RENT1_HUMAN]	334.21	7.71	1	5	5	7	1129	124.267	6.60986
P14923	Junction plakoglobin OS=Homo sapiens GN=JUP PE=1 SV=3 - [PLAK_HUMAN]	334.2	7.38	1	1	4	5	745	81.6927	6.13818
Q09160	HLA class I histocompatibility antigen, A-80 alpha chain OS=Homo sapiens GN=HLA-A PE=2 SV=1 - [1A80_HUMAN]	333.33	20.82	2	1	4	6	365	40.7662	6.30322
Q9UL46	Proteasome activator complex subunit 2 OS=Homo sapiens GN=PSME2 PE=1 SV=4 - [PSME2_HUMAN]	332.59	27.2	1	4	4	4	239	27.3843	5.73193
Q14019	Coactosin-like protein OS=Homo sapiens GN=COTL1 PE=1 SV=3 - [COTL1_HUMAN]	332.27	46.48	1	5	5	8	142	15.935	5.66846
Q9ULZ3	Apoptosis-associated speck-like protein containing a CARD OS=Homo sapiens GN=PYCARD PE=1 SV=2 - [ASC_HUMAN]	330.02	20	1	4	4	5	195	21.6133	6.34131
P62753	40S ribosomal protein S6 OS=Homo sapiens GN=RPS6 PE=1 SV=1 - [RS6_HUMAN]	329.64	16.87	1	4	4	6	249	28.663	10.8433
Q96QD8	Sodium-coupled neutral amino acid transporter 2 OS=Homo sapiens GN=SLC38A2 PE=1 SV=2 - [S38A2_HUMAN]	327.39	10.47	1	3	3	4	506	55.9895	8.00146
O75534	Cold shock domain-containing protein E1 OS=Homo sapiens GN=CSDE1 PE=1 SV=2 - [CSDE1_HUMAN]	326.67	14.41	1	10	10	10	798	88.8289	6.25244
P22413	Ectonucleotide pyrophosphatase/phosphodiesterase family member 1 OS=Homo sapiens GN=ENPP1 PE=1 SV=2 - [ENPP1_HUMAN]	326.64	15.35	1	8	8	8	925	104.857	7.13721
P84085	ADP-ribosylation factor 5 OS=Homo sapiens GN=ARF5 PE=1 SV=2 - [ARF5_HUMAN]	326.05	38.89	1	1	5	8	180	20.5166	6.78564
Q92747	Actin-related protein 2/3 complex subunit 1A OS=Homo sapiens GN=ARPC1A PE=1 SV=2 - [ARC1A_HUMAN]	325.73	24.05	1	4	5	6	370	41.5427	8.17725
Q8N4C8	Misshapen-like kinase 1 OS=Homo sapiens GN=MINK1 PE=1 SV=2 - [MINK1_HUMAN]	325.41	8.26	1	1	8	13	1332	149.729	7.85498
P10768	S-formylglutathione hydrolase OS=Homo sapiens GN=ESD PE=1 SV=2 - [ESTD_HUMAN]	324.6	30.85	1	4	4	5	282	31.4425	7.02002
Q16531	DNA damage-binding protein 1 OS=Homo sapiens GN=DDB1 PE=1 SV=1 - [DDB1_HUMAN]	323.54	9.12	1	7	7	8	1140	126.887	5.26221
Q13884	Beta-1-syntrophin OS=Homo sapiens GN=SNTB1 PE=1 SV=3 - [SNTB1_HUMAN]	323.16	17.29	1	6	6	7	538	58.0251	8.63135
Q9H3U1	Protein unc-45 homolog A OS=Homo sapiens GN=UNC45A PE=1 SV=1 - [UN45A_HUMAN]	323.15	12.08	1	7	7	10	944	103.011	6.07471
P59998	Actin-related protein 2/3 complex subunit 4 OS=Homo sapiens GN=ARPC4 PE=1 SV=3 - [ARPC4_HUMAN]	322.86	54.76	1	7	7	9	168	19.6543	8.42627
Q06124	Tyrosine-protein phosphatase non-receptor type 11 OS=Homo sapiens GN=PTPN11 PE=1 SV=2 - [PTN11_HUMAN]	322.53	14.24	1	5	5	7	597	68.3933	7.29834
Q07866	Kinesin light chain 1 OS=Homo sapiens GN=KLC1 PE=1 SV=2 - [KLC1_HUMAN]	322.1	16.23	2	6	6	8	573	65.2689	6.20166
Q99873	Protein arginine N-methyltransferase 1 OS=Homo sapiens OX=9606 GN=PRMT1 PE=1 SV=3 - [ANM1_HUMAN]	321.8	30.19	2	9	9	10	371	42.4339	5.35107
Q9Y653	G-protein coupled receptor 56 OS=Homo sapiens GN=GPR56 PE=1 SV=2 - [GPR56_HUMAN]	321.76	9.52	1	4	4	5	693	77.6882	8.48486
P60228	Eukaryotic translation initiation factor 3 subunit E OS=Homo sapiens GN=EIF3E PE=1 SV=1 - [EIF3E_HUMAN]	321.58	14.16	1	5	5	7	445	52.1874	6.03662
P08865	40S ribosomal protein SA OS=Homo sapiens GN=RPSA PE=1 SV=4 - [RSSA_HUMAN]	318.79	38.98	1	7	7	8	295	32.8334	4.86865
P62979	Ubiquitin-40S ribosomal protein S27a OS=Homo sapiens GN=RPS27A PE=1 SV=2 - [RS27A_HUMAN]	318.55	28.21	4	3	3	6	156	17.9535	9.64209
P20042	Eukaryotic translation initiation factor 2 subunit 2 OS=Homo sapiens GN=EIF2S2 PE=1 SV=2 - [IF2B_HUMAN]	316.34	30.03	1	6	7	9	333	38.3644	5.79541
P12956	X-ray repair cross-complementing protein 6 OS=Homo sapiens GN=XRCC6 PE=1 SV=2 - [XRCC6_HUMAN]	316.28	14.12	1	6	6	8	609	69.7991	6.63916
Q08380	Galectin-3-binding protein OS=Homo sapiens GN=LGALS3BP PE=1 SV=1 - [LG3BP_HUMAN]	316.12	13.33	1	5	5	6	585	65.2893	5.2749
Q6NZI2	Polymerase I and transcript release factor OS=Homo sapiens GN=PTRF PE=1 SV=1 - [PTRF_HUMAN]	315.52	22.05	1	4	4	6	390	43.4498	5.60498
O43747	AP-1 complex subunit gamma-1 OS=Homo sapiens GN=AP1G1 PE=1 SV=5 - [AP1G1_HUMAN]	315.38	10.22	1	5	5	7	822	91.2931	6.80029
P15121	Aldose reductase OS=Homo sapiens GN=AKR1B1 PE=1 SV=3 - [ALDR_HUMAN]	315.02	21.52	1	3	4	6	316	35.8305	6.97607
P13861	cAMP-dependent protein kinase type II-alpha regulatory subunit OS=Homo sapiens GN=PRKAR2A PE=1 SV=2 - [KAP2_HUMAN]	314.29	18.32	1	2	5	6	404	45.49	5.07178
Q96RD7	Pannexin-1 OS=Homo sapiens GN=PANX1 PE=1 SV=4 - [PANX1_HUMAN]	313.85	23.24	1	6	6	7	426	48.019	6.01123
O60711	Leupaxin OS=Homo sapiens GN=LPXN PE=1 SV=1 - [LPXN_HUMAN]	313.47	18.13	1	4	4	5	386	43.3035	6.01123
P24534	Elongation factor 1-beta OS=Homo sapiens GN=EEF1B2 PE=1 SV=3 - [EF1B_HUMAN]	312.86	40.89	1	4	6	7	225	24.7483	4.66553
Q9NVA2	Septin-11 OS=Homo sapiens GN=SEPT11 PE=1 SV=3 - [SEP11_HUMAN]	312.69	28.44	3	5	8	10	429	49.3672	6.81494
Q9BZF9	Uveal autoantigen with coiled-coil domains and ankyrin repeats OS=Homo sapiens GN=UACA PE=1 SV=2 - [UACA_HUMAN]	310.52	5.23	1	5	5	5	1416	162.404	7.03467
Q00341	Vigilin OS=Homo sapiens GN=HDLBP PE=1 SV=2 - [VIGLN_HUMAN]	310.42	7.26	1	5	5	6	1268	141.368	6.87354
O95163	Elongator complex protein 1 OS=Homo sapiens GN=IKBKAP PE=1 SV=3 - [ELP1_HUMAN]	310.02	5.11	1	4	4	6	1332	150.159	5.93506
Q99572	P2X purinoceptor 7 OS=Homo sapiens GN=P2RX7 PE=1 SV=4 - [P2RX7_HUMAN]	309.05	10.76	1	5	5	6	595	68.5401	8.19189
P53990	IST1 homolog OS=Homo sapiens GN=IST1 PE=1 SV=1 - [IST1_HUMAN]	308.72	12.36	1	3	3	5	364	39.7255	5.35107
Q9HCJ1	Progressive ankylosis protein homolog OS=Homo sapiens GN=ANKH PE=1 SV=2 - [ANKH_HUMAN]	308.37	16.67	1	4	4	6	492	54.2054	7.88428
P54819	Adenylate kinase 2, mitochondrial OS=Homo sapiens GN=AK2 PE=1 SV=2 - [KAD2_HUMAN]	307.95	33.47	1	5	5	6	239	26.4608	7.81104
Q15008	26S proteasome non-ATPase regulatory subunit 6 OS=Homo sapiens GN=PSMD6 PE=1 SV=1 - [PSMD6_HUMAN]	307.77	18.77	1	7	7	8	389	45.5023	5.61768
P19623	Spermidine synthase OS=Homo sapiens GN=SRM PE=1 SV=1 - [SPEE_HUMAN]	307.59	29.8	1	6	6	7	302	33.8027	5.49072
Q9Y5S1	Transient receptor potential cation channel subfamily V member 2 OS=Homo sapiens GN=TRPV2 PE=1 SV=1 - [TRPV2_HUMAN]	306.29	9.03	1	5	5	6	764	85.9261	5.8335
Q9NZN4	EH domain-containing protein 2 OS=Homo sapiens GN=EHD2 PE=1 SV=2 - [EHD2_HUMAN]	305.42	15.84	1	4	7	7	543	61.1227	6.45557
O00478	Butyrophilin subfamily 3 member A3 OS=Homo sapiens GN=BTN3A3 PE=1 SV=1 - [BT3A3_HUMAN]	304.78	11.99	2	2	4	5	584	64.9609	5.52881
Q9UKE5	TRAF2 and NCK-interacting protein kinase OS=Homo sapiens GN=TNIK PE=1 SV=1 - [TNIK_HUMAN]	303.42	9.56	1	2	8	13	1360	154.848	7.1665
P20290	Transcription factor BTF3 OS=Homo sapiens GN=BTF3 PE=1 SV=1 - [BTF3_HUMAN]	303.32	33.5	1	3	3	4	206	22.1544	9.37842
P61353	60S ribosomal protein L27 OS=Homo sapiens GN=RPL27 PE=1 SV=2 - [RL27_HUMAN]	303.12	36.03	1	4	4	10	136	15.7877	10.5649
P14314	Glucosidase 2 subunit beta OS=Homo sapiens GN=PRKCSH PE=1 SV=2 - [GLU2B_HUMAN]	302.81	5.3	1	3	3	5	528	59.3878	4.41162
P53004	Biliverdin reductase A OS=Homo sapiens GN=BLVRA PE=1 SV=2 - [BIEA_HUMAN]	301.97	30.07	1	6	6	7	296	33.4073	6.44287
O75165	DnaJ homolog subfamily C member 13 OS=Homo sapiens GN=DNAJC13 PE=1 SV=5 - [DJC13_HUMAN]	301.17	5.39	1	10	10	10	2243	254.252	6.7417
P48444	Coatomer subunit delta OS=Homo sapiens GN=ARCN1 PE=1 SV=1 - [COPD_HUMAN]	300.81	9.2	1	4	4	12	511	57.1741	6.21436
O75828	Carbonyl reductase [NADPH] 3 OS=Homo sapiens GN=CBR3 PE=1 SV=3 - [CBR3_HUMAN]	300.57	24.91	1	3	5	7	277	30.8307	6.17627
Q9UNH7	Sorting nexin-6 OS=Homo sapiens GN=SNX6 PE=1 SV=1 - [SNX6_HUMAN]	300.43	16.26	2	4	4	4	406	46.6198	6.16357
Q9UHN6	Transmembrane protein 2 OS=Homo sapiens GN=TMEM2 PE=1 SV=1 - [TMEM2_HUMAN]	299.97	6.51	1	6	6	7	1383	154.276	8.14795
Q9UGH3	Solute carrier family 23 member 2 OS=Homo sapiens GN=SLC23A2 PE=1 SV=1 - [S23A2_HUMAN]	298.85	14.15	1	6	6	7	650	70.2914	7.6792
P28070	Proteasome subunit beta type-4 OS=Homo sapiens GN=PSMB4 PE=1 SV=4 - [PSB4_HUMAN]	298.72	32.58	1	4	4	4	264	29.1855	5.97314
Q15043	Zinc transporter ZIP14 OS=Homo sapiens GN=SLC39A14 PE=1 SV=3 - [S39AE_HUMAN]	298.12	9.15	1	3	3	4	492	54.1772	5.32568
P50502	Hsc70-interacting protein OS=Homo sapiens GN=ST13 PE=1 SV=2 - [F10A1_HUMAN]	297.31	14.36	3	4	4	5	369	41.3055	5.2749
P18621	60S ribosomal protein L17 OS=Homo sapiens GN=RPL17 PE=1 SV=3 - [RL17_HUMAN]	297.2	23.91	1	3	3	6	184	21.3833	10.1694
P13807	Glycogen [starch] synthase, muscle OS=Homo sapiens GN=GYS1 PE=1 SV=2 - [GYS1_HUMAN]	296.77	8.14	1	4	4	7	737	83.7325	6.17627
Q15436	Protein transport protein Sec23A OS=Homo sapiens GN=SEC23A PE=1 SV=2 - [SC23A_HUMAN]	296.44	8.76	1	3	4	6	765	86.1053	7.07861
P26196	Probable ATP-dependent RNA helicase DDX6 OS=Homo sapiens GN=DDX6 PE=1 SV=2 - [DDX6_HUMAN]	296.3	19.25	1	6	6	6	483	54.3823	8.66064
P61163	Alpha-centractin OS=Homo sapiens GN=ACTR1A PE=1 SV=1 - [ACTZ_HUMAN]	296.25	40.96	1	5	9	10	376	42.5869	6.63916
P10644	cAMP-dependent protein kinase type I-alpha regulatory subunit OS=Homo sapiens GN=PRKAR1A PE=1 SV=1 - [KAP0_HUMAN]	294.43	22.57	1	5	5	7	381	42.955	5.35107
Q9Y2H2	Phosphatidylinositide phosphatase SAC2 OS=Homo sapiens GN=INPP5F PE=1 SV=3 - [SAC2_HUMAN]	293.91	7.24	1	4	5	6	1132	128.326	7.02002
Q9BWD1	Acetyl-CoA acetyltransferase, cytosolic OS=Homo sapiens GN=ACAT2 PE=1 SV=2 - [THIC_HUMAN]	293.57	37.53	1	6	6	7	397	41.3244	6.91748
Q9P0V3	SH3 domain-binding protein 4 OS=Homo sapiens GN=SH3BP4 PE=1 SV=1 - [SH3B4_HUMAN]	293	10.28	1	7	7	7	963	107.428	7.7085
P08648	Integrin alpha-5 OS=Homo sapiens GN=ITGA5 PE=1 SV=2 - [ITA5_HUMAN]	292.04	6.29	1	4	4	4	1049	114.465	5.77002
Q13283	Ras GTPase-activating protein-binding protein 1 OS=Homo sapiens GN=G3BP1 PE=1 SV=1 - [G3BP1_HUMAN]	290.85	13.52	1	4	4	7	466	52.1321	5.51611
P54619	5'-AMP-activated protein kinase subunit gamma-1 OS=Homo sapiens GN=PRKAG1 PE=1 SV=1 - [AAKG1_HUMAN]	290.68	12.08	2	3	3	4	331	37.5558	6.91748
O94887	FERM, RhoGEF and pleckstrin domain-containing protein 2 OS=Homo sapiens GN=FARP2 PE=1 SV=3 - [FARP2_HUMAN]	289.42	12.33	1	7	7	7	1054	119.813	8.79248
P30483	HLA class I histocompatibility antigen, B-45 alpha chain OS=Homo sapiens GN=HLA-B PE=1 SV=1 - [1B45_HUMAN]	289.22	17.96	17	1	5	8	362	40.3891	6.46826
P61006	Ras-related protein Rab-8A OS=Homo sapiens GN=RAB8A PE=1 SV=1 - [RAB8A_HUMAN]	289.05	34.3	10	2	6	7	207	23.6532	9.0708
Q12884	Seprase OS=Homo sapiens GN=FAP PE=1 SV=5 - [SEPR_HUMAN]	288.69	10.39	1	7	7	8	760	87.6567	6.65381
P30044	Peroxiredoxin-5, mitochondrial OS=Homo sapiens GN=PRDX5 PE=1 SV=4 - [PRDX5_HUMAN]	287.32	37.38	1	7	7	8	214	22.0725	8.70459
P30085	UMP-CMP kinase OS=Homo sapiens GN=CMPK1 PE=1 SV=3 - [KCY_HUMAN]	287.05	25.51	1	5	5	6	196	22.2083	5.56689
Q9P2R3	Ankyrin repeat and FYVE domain-containing protein 1 OS=Homo sapiens GN=ANKFY1 PE=1 SV=2 - [ANFY1_HUMAN]	286.94	8.73	1	4	4	4	1169	128.318	6.1001
O15067	Phosphoribosylformylglycinamidine synthase OS=Homo sapiens GN=PFAS PE=1 SV=4 - [PUR4_HUMAN]	286.5	9.27	1	7	7	8	1338	144.643	5.75732
P60903	Protein S100-A10 OS=Homo sapiens GN=S100A10 PE=1 SV=2 - [S10AA_HUMAN]	285.93	35.05	1	2	2	10	97	11.1955	7.37158
O00161	Synaptosomal-associated protein 23 OS=Homo sapiens GN=SNAP23 PE=1 SV=1 - [SNP23_HUMAN]	285.92	39.81	1	4	4	4	211	23.3395	5.0083
P53985	Monocarboxylate transporter 1 OS=Homo sapiens GN=SLC16A1 PE=1 SV=3 - [MOT1_HUMAN]	284.53	13.4	1	4	4	6	500	53.9089	8.66064
Q13310	Polyadenylate-binding protein 4 OS=Homo sapiens GN=PABPC4 PE=1 SV=1 - [PABP4_HUMAN]	283.74	11.8	1	2	5	5	644	70.7381	9.26123
Q96N67	Dedicator of cytokinesis protein 7 OS=Homo sapiens GN=DOCK7 PE=1 SV=4 - [DOCK7_HUMAN]	283.24	5.42	2	7	7	7	2140	242.407	6.80029
P33527	Multidrug resistance-associated protein 1 OS=Homo sapiens GN=ABCC1 PE=1 SV=3 - [MRP1_HUMAN]	281.53	5.62	1	5	5	5	1531	171.481	7.10791
O43242	26S proteasome non-ATPase regulatory subunit 3 OS=Homo sapiens GN=PSMD3 PE=1 SV=2 - [PSMD3_HUMAN]	281.21	21.35	1	8	8	10	534	60.9395	8.44092
Q16666	Gamma-interferon-inducible protein 16 OS=Homo sapiens GN=IFI16 PE=1 SV=3 - [IF16_HUMAN]	281.2	8.03	1	5	5	5	785	88.1994	9.27588
Q92599	Septin-8 OS=Homo sapiens GN=SEPT8 PE=1 SV=4 - [SEPT8_HUMAN]	280.42	19.67	2	3	6	8	483	55.7211	6.27783
Q9NQW7	Xaa-Pro aminopeptidase 1 OS=Homo sapiens GN=XPNPEP1 PE=1 SV=3 - [XPP1_HUMAN]	279.63	11.4	1	5	5	7	623	69.8732	5.66846
P21980	Protein-glutamine gamma-glutamyltransferase 2 OS=Homo sapiens GN=TGM2 PE=1 SV=2 - [TGM2_HUMAN]	279.29	13.83	1	6	6	6	687	77.2797	5.22412
Q9Y266	Nuclear migration protein nudC OS=Homo sapiens GN=NUDC PE=1 SV=1 - [NUDC_HUMAN]	278.75	17.52	1	5	5	7	331	38.2191	5.37646
Q14103	Heterogeneous nuclear ribonucleoprotein D0 OS=Homo sapiens GN=HNRNPD PE=1 SV=1 - [HNRPD_HUMAN]	278.43	14.93	1	3	4	4	355	38.4103	7.81104
Q9BTT6	Leucine-rich repeat-containing protein 1 OS=Homo sapiens GN=LRRC1 PE=1 SV=1 - [LRRC1_HUMAN]	278.31	17.94	1	4	4	5	524	59.2049	5.021
Q13492	Phosphatidylinositol-binding clathrin assembly protein OS=Homo sapiens GN=PICALM PE=1 SV=2 - [PICAL_HUMAN]	277.76	12.88	2	6	6	6	652	70.71	7.89893
P31943	Heterogeneous nuclear ribonucleoprotein H OS=Homo sapiens GN=HNRNPH1 PE=1 SV=4 - [HNRH1_HUMAN]	277.48	13.36	2	2	3	4	449	49.1984	6.30322
Q15366	Poly(rC)-binding protein 2 OS=Homo sapiens GN=PCBP2 PE=1 SV=1 - [PCBP2_HUMAN]	277.17	25.75	2	4	6	7	365	38.5556	6.78564
P51812	Ribosomal protein S6 kinase alpha-3 OS=Homo sapiens GN=RPS6KA3 PE=1 SV=1 - [KS6A3_HUMAN]	276.42	12.97	3	3	6	6	740	83.6829	6.88818
Q8WTV0	Scavenger receptor class B member 1 OS=Homo sapiens GN=SCARB1 PE=1 SV=1 - [SCRB1_HUMAN]	276.2	17.03	1	7	7	8	552	60.8377	8.23584
P21283	V-type proton ATPase subunit C 1 OS=Homo sapiens GN=ATP6V1C1 PE=1 SV=4 - [VATC1_HUMAN]	275.85	15.71	1	5	5	7	382	43.914	7.45947
P54578	Ubiquitin carboxyl-terminal hydrolase 14 OS=Homo sapiens GN=USP14 PE=1 SV=3 - [UBP14_HUMAN]	275.61	14.78	1	5	5	5	494	56.033	5.30029
Q13162	Peroxiredoxin-4 OS=Homo sapiens GN=PRDX4 PE=1 SV=1 - [PRDX4_HUMAN]	275.41	23.99	1	3	4	7	271	30.5208	6.29053
P25787	Proteasome subunit alpha type-2 OS=Homo sapiens GN=PSMA2 PE=1 SV=2 - [PSA2_HUMAN]	275.23	32.48	1	5	5	6	234	25.8823	7.43018
P14866	Heterogeneous nuclear ribonucleoprotein L OS=Homo sapiens GN=HNRNPL PE=1 SV=2 - [HNRPL_HUMAN]	274.03	14.94	1	4	4	6	589	64.0924	8.22119
P52565	Rho GDP-dissociation inhibitor 1 OS=Homo sapiens GN=ARHGDIA PE=1 SV=3 - [GDIR1_HUMAN]	273.89	53.92	1	5	5	6	204	23.1927	5.10986
Q9NTK5	Obg-like ATPase 1 OS=Homo sapiens GN=OLA1 PE=1 SV=2 - [OLA1_HUMAN]	273.39	18.69	1	6	6	7	396	44.7153	7.81104
P54920	Alpha-soluble NSF attachment protein OS=Homo sapiens GN=NAPA PE=1 SV=3 - [SNAA_HUMAN]	273.3	17.63	1	4	4	5	295	33.2113	5.36377
O43854	EGF-like repeat and discoidin I-like domain-containing protein 3 OS=Homo sapiens GN=EDIL3 PE=1 SV=1 - [EDIL3_HUMAN]	273.11	18.96	1	6	6	8	480	53.73	7.28369
Q04760	Lactoylglutathione lyase OS=Homo sapiens GN=GLO1 PE=1 SV=4 - [LGUL_HUMAN]	272.24	51.09	1	6	6	7	184	20.7642	5.31299
Q7L9L4	MOB kinase activator 1B OS=Homo sapiens GN=MOB1B PE=1 SV=3 - [MOB1B_HUMAN]	272.12	35.65	2	6	6	7	216	25.0746	6.72705
O60701	UDP-glucose 6-dehydrogenase OS=Homo sapiens GN=UGDH PE=1 SV=1 - [UGDH_HUMAN]	271.85	13.97	1	5	5	6	494	54.9893	7.12256
Q9BR76	Coronin-1B OS=Homo sapiens GN=CORO1B PE=1 SV=1 - [COR1B_HUMAN]	271.73	16.77	1	5	5	6	489	54.2003	5.88428
P00390	Glutathione reductase, mitochondrial OS=Homo sapiens GN=GSR PE=1 SV=2 - [GSHR_HUMAN]	270.12	8.62	1	3	3	5	522	56.221	8.49951
Q93034	Cullin-5 OS=Homo sapiens GN=CUL5 PE=1 SV=4 - [CUL5_HUMAN]	269.7	10.51	1	5	5	5	780	90.8974	7.94287
Q06323	Proteasome activator complex subunit 1 OS=Homo sapiens GN=PSME1 PE=1 SV=1 - [PSME1_HUMAN]	269.67	36.14	1	7	7	8	249	28.705	6.02393
Q9HB07	UPF0160 protein MYG1, mitochondrial OS=Homo sapiens GN=C12orf10 PE=1 SV=2 - [MYG1_HUMAN]	269.47	18.88	1	6	6	6	376	42.4224	6.66846
Q9BXS5	AP-1 complex subunit mu-1 OS=Homo sapiens GN=AP1M1 PE=1 SV=3 - [AP1M1_HUMAN]	269.42	23.17	2	7	7	9	423	48.5561	7.29834
P50570	Dynamin-2 OS=Homo sapiens GN=DNM2 PE=1 SV=2 - [DYN2_HUMAN]	268.66	11.49	3	7	7	7	870	98.0032	7.44482
Q9NV70	Exocyst complex component 1 OS=Homo sapiens GN=EXOC1 PE=1 SV=4 - [EXOC1_HUMAN]	268.17	7.49	1	4	4	5	894	101.917	6.60986
P31323	cAMP-dependent protein kinase type II-beta regulatory subunit OS=Homo sapiens GN=PRKAR2B PE=1 SV=3 - [KAP3_HUMAN]	267.49	15.55	1	2	5	5	418	46.2729	4.91943
Q6DD88	Atlastin-3 OS=Homo sapiens GN=ATL3 PE=1 SV=1 - [ATLA3_HUMAN]	267.46	15.53	1	5	5	5	541	60.5034	5.65576
Q06830	Peroxiredoxin-1 OS=Homo sapiens GN=PRDX1 PE=1 SV=1 - [PRDX1_HUMAN]	267.43	37.69	1	3	5	7	199	22.0963	8.1333
P25789	Proteasome subunit alpha type-4 OS=Homo sapiens GN=PSMA4 PE=1 SV=1 - [PSA4_HUMAN]	266.75	19.16	1	3	3	3	261	29.4652	7.72314
P61313	60S ribosomal protein L15 OS=Homo sapiens GN=RPL15 PE=1 SV=2 - [RL15_HUMAN]	266.65	33.82	1	7	7	7	204	24.1311	11.6196
P20839	Inosine-5'-monophosphate dehydrogenase 1 OS=Homo sapiens GN=IMPDH1 PE=1 SV=2 - [IMDH1_HUMAN]	266.36	15.18	1	4	4	6	514	55.3705	6.90283
Q9NYU2	UDP-glucose:glycoprotein glucosyltransferase 1 OS=Homo sapiens GN=UGGT1 PE=1 SV=3 - [UGGG1_HUMAN]	266.04	6.62	1	6	6	7	1555	177.078	5.63037
P26639	Threonine--tRNA ligase, cytoplasmic OS=Homo sapiens GN=TARS PE=1 SV=3 - [SYTC_HUMAN]	266	12.86	1	7	7	8	723	83.3819	6.66846
P00491	Purine nucleoside phosphorylase OS=Homo sapiens GN=PNP PE=1 SV=2 - [PNPH_HUMAN]	264.31	17.3	1	5	5	5	289	32.0972	6.94678
Q13425	Beta-2-syntrophin OS=Homo sapiens GN=SNTB2 PE=1 SV=1 - [SNTB2_HUMAN]	263.67	13.52	1	5	6	6	540	57.913	8.82178
O95433	Activator of 90 kDa heat shock protein ATPase homolog 1 OS=Homo sapiens GN=AHSA1 PE=1 SV=1 - [AHSA1_HUMAN]	263.56	19.82	1	4	4	5	338	38.2503	5.52881
Q96RW7	Hemicentin-1 OS=Homo sapiens GN=HMCN1 PE=1 SV=2 - [HMCN1_HUMAN]	261.55	1.4	1	5	5	5	5635	613.001	6.49365
Q14108	Lysosome membrane protein 2 OS=Homo sapiens GN=SCARB2 PE=1 SV=2 - [SCRB2_HUMAN]	261.49	18.41	1	5	5	6	478	54.2555	5.13525
Q14644	Ras GTPase-activating protein 3 OS=Homo sapiens GN=RASA3 PE=1 SV=3 - [RASA3_HUMAN]	261.44	8.15	1	5	5	5	834	95.6382	7.15186
Q5VZK9	Leucine-rich repeat-containing protein 16A OS=Homo sapiens GN=LRRC16A PE=1 SV=1 - [LR16A_HUMAN]	261.16	6.49	1	4	4	4	1371	151.462	7.85498
Q8TAT6	Nuclear protein localization protein 4 homolog OS=Homo sapiens GN=NPLOC4 PE=1 SV=3 - [NPL4_HUMAN]	260.65	11.35	1	5	5	7	608	68.0769	6.37939
P09493	Tropomyosin alpha-1 chain OS=Homo sapiens GN=TPM1 PE=1 SV=2 - [TPM1_HUMAN]	260.36	21.13	1	1	7	9	284	32.6887	4.7417
Q99523	Sortilin OS=Homo sapiens GN=SORT1 PE=1 SV=3 - [SORT_HUMAN]	260.15	4.57	1	3	3	4	831	92.0095	5.74463
Q9Y6E2	Basic leucine zipper and W2 domain-containing protein 2 OS=Homo sapiens GN=BZW2 PE=1 SV=1 - [BZW2_HUMAN]	259.08	19.81	1	6	7	8	419	48.132	6.68311
Q14156	Protein EFR3 homolog A OS=Homo sapiens GN=EFR3A PE=1 SV=2 - [EFR3A_HUMAN]	259.02	6.46	2	4	4	5	821	92.8649	6.69775
P21860	Receptor tyrosine-protein kinase erbB-3 OS=Homo sapiens GN=ERBB3 PE=1 SV=1 - [ERBB3_HUMAN]	257.66	4.02	1	3	3	6	1342	148.002	6.55127
P62263	40S ribosomal protein S14 OS=Homo sapiens GN=RPS14 PE=1 SV=3 - [RS14_HUMAN]	256.92	63.58	1	5	5	8	151	16.2625	10.0522
P84095	Rho-related GTP-binding protein RhoG OS=Homo sapiens GN=RHOG PE=1 SV=1 - [RHOG_HUMAN]	256.47	19.9	1	3	3	4	191	21.2949	8.11865
O60879	Protein diaphanous homolog 2 OS=Homo sapiens GN=DIAPH2 PE=1 SV=1 - [DIAP2_HUMAN]	255.92	3.36	1	2	2	3	1101	125.49	6.58057
P62330	ADP-ribosylation factor 6 OS=Homo sapiens GN=ARF6 PE=1 SV=2 - [ARF6_HUMAN]	255.74	45.71	2	5	5	5	175	20.0694	8.95361
Q9UMS4	Pre-mRNA-processing factor 19 OS=Homo sapiens GN=PRPF19 PE=1 SV=1 - [PRP19_HUMAN]	254.9	10.91	1	4	4	6	504	55.1463	6.60986
Q9HB71	Calcyclin-binding protein OS=Homo sapiens GN=CACYBP PE=1 SV=2 - [CYBP_HUMAN]	254.77	21.93	1	3	3	5	228	26.1936	8.25049
Q12959	Disks large homolog 1 OS=Homo sapiens GN=DLG1 PE=1 SV=2 - [DLG1_HUMAN]	254.46	6.75	1	3	3	4	904	100.393	5.75732
P49593	Protein phosphatase 1F OS=Homo sapiens GN=PPM1F PE=1 SV=3 - [PPM1F_HUMAN]	254.17	14.32	1	3	3	5	454	49.8001	5.09717
P20036	HLA class II histocompatibility antigen, DP alpha 1 chain OS=Homo sapiens GN=HLA-DPA1 PE=1 SV=1 - [DPA1_HUMAN]	254.11	17.69	1	3	3	6	260	29.3619	5.21143
P31949	Protein S100-A11 OS=Homo sapiens GN=S100A11 PE=1 SV=2 - [S10AB_HUMAN]	253.49	23.81	1	2	2	4	105	11.7328	7.12256
O00303	Eukaryotic translation initiation factor 3 subunit F OS=Homo sapiens GN=EIF3F PE=1 SV=1 - [EIF3F_HUMAN]	253.1	15.41	1	4	4	4	357	37.5402	5.45264
P06748	Nucleophosmin OS=Homo sapiens GN=NPM1 PE=1 SV=2 - [NPM_HUMAN]	252.9	21.77	1	3	3	4	294	32.5548	4.77979
P51665	26S proteasome non-ATPase regulatory subunit 7 OS=Homo sapiens GN=PSMD7 PE=1 SV=2 - [PSD7_HUMAN]	252.48	36.42	1	5	5	6	324	37.0025	6.771
Q6ZS17	Protein FAM65A OS=Homo sapiens GN=FAM65A PE=1 SV=1 - [FA65A_HUMAN]	252.16	5.89	1	4	4	4	1223	132.225	6.27783
Q9Y6G9	Cytoplasmic dynein 1 light intermediate chain 1 OS=Homo sapiens GN=DYNC1LI1 PE=1 SV=3 - [DC1L1_HUMAN]	251.31	15.3	1	5	5	6	523	56.544	6.41748
O75351	Vacuolar protein sorting-associated protein 4B OS=Homo sapiens GN=VPS4B PE=1 SV=2 - [VPS4B_HUMAN]	250.73	22.3	2	4	6	8	444	49.2715	7.2251
O15127	Secretory carrier-associated membrane protein 2 OS=Homo sapiens GN=SCAMP2 PE=1 SV=2 - [SCAM2_HUMAN]	250.46	10.33	1	3	3	4	329	36.6253	6.1001
Q12929	Epidermal growth factor receptor kinase substrate 8 OS=Homo sapiens GN=EPS8 PE=1 SV=1 - [EPS8_HUMAN]	250.28	6.93	1	4	4	5	822	91.8244	7.50342
Q9C0C9	Ubiquitin-conjugating enzyme E2 O OS=Homo sapiens GN=UBE2O PE=1 SV=3 - [UBE2O_HUMAN]	250.16	7.66	1	4	4	4	1292	141.205	5.12256
P78417	Glutathione S-transferase omega-1 OS=Homo sapiens GN=GSTO1 PE=1 SV=2 - [GSTO1_HUMAN]	249.1	36.51	1	6	6	7	241	27.548	6.59521
O15260	Surfeit locus protein 4 OS=Homo sapiens GN=SURF4 PE=1 SV=3 - [SURF4_HUMAN]	248.65	12.64	1	2	2	3	269	30.3738	7.78174
P52789	Hexokinase-2 OS=Homo sapiens GN=HK2 PE=1 SV=2 - [HXK2_HUMAN]	247.78	7.52	2	4	5	5	917	102.313	6.04932
O14744	Protein arginine N-methyltransferase 5 OS=Homo sapiens GN=PRMT5 PE=1 SV=4 - [ANM5_HUMAN]	247.37	22.61	1	8	8	8	637	72.6376	6.29053
P13591	Neural cell adhesion molecule 1 OS=Homo sapiens GN=NCAM1 PE=1 SV=3 - [NCAM1_HUMAN]	246.73	10.72	1	4	4	6	858	94.5152	4.86865
P49589	Cysteine--tRNA ligase, cytoplasmic OS=Homo sapiens GN=CARS PE=1 SV=3 - [SYCC_HUMAN]	246.63	13.24	1	7	7	7	748	85.4192	6.75635
Q9Y376	Calcium-binding protein 39 OS=Homo sapiens GN=CAB39 PE=1 SV=1 - [CAB39_HUMAN]	246.54	17.89	2	6	6	7	341	39.8437	6.88818
Q99798	Aconitate hydratase, mitochondrial OS=Homo sapiens GN=ACO2 PE=1 SV=2 - [ACON_HUMAN]	246.35	9.23	1	4	5	5	780	85.3719	7.60596
P02787	Serotransferrin OS=Homo sapiens GN=TF PE=1 SV=3 - [TRFE_HUMAN]	246.26	12.75	1	6	6	6	698	77.0136	7.12256
Q9UKS6	Protein kinase C and casein kinase substrate in neurons protein 3 OS=Homo sapiens GN=PACSIN3 PE=1 SV=2 - [PACN3_HUMAN]	245.94	12.5	1	4	4	4	424	48.4568	6.17627
Q14257	Reticulocalbin-2 OS=Homo sapiens GN=RCN2 PE=1 SV=1 - [RCN2_HUMAN]	245.61	16.4	1	3	3	3	317	36.8536	4.39893
Q9C0D5	Protein TANC1 OS=Homo sapiens GN=TANC1 PE=1 SV=3 - [TANC1_HUMAN]	244.66	2.58	1	3	3	7	1861	202.093	8.32373
Q13409	Cytoplasmic dynein 1 intermediate chain 2 OS=Homo sapiens GN=DYNC1I2 PE=1 SV=3 - [DC1I2_HUMAN]	244.2	12.85	1	4	4	5	638	71.4121	5.19873
Q00839	Heterogeneous nuclear ribonucleoprotein U OS=Homo sapiens GN=HNRNPU PE=1 SV=6 - [HNRPU_HUMAN]	244.08	8.97	1	5	5	6	825	90.528	5.99854
Q92930	Ras-related protein Rab-8B OS=Homo sapiens GN=RAB8B PE=1 SV=2 - [RAB8B_HUMAN]	243.69	34.3	10	2	6	7	207	23.5691	9.0708
P48426	Phosphatidylinositol-5-phosphate 4-kinase type-2 alpha OS=Homo sapiens GN=PIP4K2A PE=1 SV=2 - [PI42A_HUMAN]	243.38	7.64	2	2	2	3	406	46.1955	6.99072
P46782	40S ribosomal protein S5 OS=Homo sapiens GN=RPS5 PE=1 SV=4 - [RS5_HUMAN]	243.11	35.78	1	4	4	5	204	22.8621	9.71533
O43399	Tumor protein D54 OS=Homo sapiens GN=TPD52L2 PE=1 SV=2 - [TPD54_HUMAN]	241.87	28.16	1	4	4	5	206	22.2243	5.36377
Q12906	Interleukin enhancer-binding factor 3 OS=Homo sapiens GN=ILF3 PE=1 SV=3 - [ILF3_HUMAN]	241.71	5.7	1	3	3	3	894	95.2791	8.76318
O75436	Vacuolar protein sorting-associated protein 26A OS=Homo sapiens GN=VPS26A PE=1 SV=2 - [VP26A_HUMAN]	241.33	13.46	1	3	3	4	327	38.1457	6.56592
Q9ULC4	Malignant T-cell-amplified sequence 1 OS=Homo sapiens GN=MCTS1 PE=1 SV=1 - [MCTS1_HUMAN]	240.76	41.99	1	5	5	6	181	20.5418	8.82178
P36551	Coproporphyrinogen-III oxidase, mitochondrial OS=Homo sapiens GN=CPOX PE=1 SV=3 - [HEM6_HUMAN]	240.74	15.2	1	6	6	7	454	50.12	8.25049
P15151	Poliovirus receptor OS=Homo sapiens GN=PVR PE=1 SV=2 - [PVR_HUMAN]	240.53	10.31	1	3	3	4	417	45.2738	6.52197
Q9NQC3	Reticulon-4 OS=Homo sapiens GN=RTN4 PE=1 SV=2 - [RTN4_HUMAN]	238.97	5.12	1	3	3	4	1192	129.851	4.50049
Q9H7D7	WD repeat-containing protein 26 OS=Homo sapiens GN=WDR26 PE=1 SV=3 - [WDR26_HUMAN]	238.79	9.08	1	4	4	4	661	72.0787	6.16357
P62906	60S ribosomal protein L10a OS=Homo sapiens GN=RPL10A PE=1 SV=2 - [RL10A_HUMAN]	238.77	14.29	1	4	4	7	217	24.8155	9.93506
O14974	Protein phosphatase 1 regulatory subunit 12A OS=Homo sapiens GN=PPP1R12A PE=1 SV=1 - [MYPT1_HUMAN]	238.37	3.5	1	2	2	3	1030	115.211	5.40186
P39019	40S ribosomal protein S19 OS=Homo sapiens GN=RPS19 PE=1 SV=2 - [RS19_HUMAN]	237.44	30.34	1	6	6	7	145	16.0505	10.3159
Q15369	Transcription elongation factor B polypeptide 1 OS=Homo sapiens GN=TCEB1 PE=1 SV=1 - [ELOC_HUMAN]	237.38	28.57	1	2	2	3	112	12.465	4.77979
O60256	Phosphoribosyl pyrophosphate synthase-associated protein 2 OS=Homo sapiens GN=PRPSAP2 PE=1 SV=1 - [KPRB_HUMAN]	235.61	19.51	2	5	5	5	369	40.8994	7.44482
Q8TF42	Ubiquitin-associated and SH3 domain-containing protein B OS=Homo sapiens GN=UBASH3B PE=1 SV=2 - [UBS3B_HUMAN]	235.41	6.93	1	3	3	6	649	72.6494	6.93213
P47712	Cytosolic phospholipase A2 OS=Homo sapiens GN=PLA2G4A PE=1 SV=2 - [PA24A_HUMAN]	235.3	8.54	1	3	3	3	749	85.1842	5.37646
Q6UVY6	DBH-like monooxygenase protein 1 OS=Homo sapiens GN=MOXD1 PE=1 SV=1 - [MOXD1_HUMAN]	234.9	13.38	1	5	5	6	613	69.6077	6.43018
P23458	Tyrosine-protein kinase JAK1 OS=Homo sapiens GN=JAK1 PE=1 SV=2 - [JAK1_HUMAN]	234.66	5.29	1	3	3	4	1154	133.191	7.54736
Q08623	Pseudouridine-5'-monophosphatase OS=Homo sapiens GN=HDHD1 PE=1 SV=3 - [HDHD1_HUMAN]	234.61	17.98	1	2	2	4	228	25.2329	5.31299
P35611	Alpha-adducin OS=Homo sapiens GN=ADD1 PE=1 SV=2 - [ADDA_HUMAN]	234.6	14.38	1	5	5	5	737	80.9047	5.8335
Q07960	Rho GTPase-activating protein 1 OS=Homo sapiens GN=ARHGAP1 PE=1 SV=1 - [RHG01_HUMAN]	234.45	28.25	1	7	7	7	439	50.4042	6.29053
Q02750	Dual specificity mitogen-activated protein kinase kinase 1 OS=Homo sapiens GN=MAP2K1 PE=1 SV=2 - [MP2K1_HUMAN]	234.37	8.4	2	2	2	4	393	43.4113	6.62451
Q9H3Z4	DnaJ homolog subfamily C member 5 OS=Homo sapiens GN=DNAJC5 PE=1 SV=1 - [DNJC5_HUMAN]	233.72	20.2	1	3	3	3	198	22.1343	5.07178
O43813	LanC-like protein 1 OS=Homo sapiens GN=LANCL1 PE=1 SV=1 - [LANC1_HUMAN]	233.66	19.8	1	5	5	5	399	45.2536	7.75244
O14818	Proteasome subunit alpha type-7 OS=Homo sapiens GN=PSMA7 PE=1 SV=1 - [PSA7_HUMAN]	233.26	30.24	2	5	5	6	248	27.8696	8.45557
P49721	Proteasome subunit beta type-2 OS=Homo sapiens GN=PSMB2 PE=1 SV=1 - [PSB2_HUMAN]	233	34.83	1	4	4	6	201	22.8217	7.02002
O14787	Transportin-2 OS=Homo sapiens GN=TNPO2 PE=1 SV=3 - [TNPO2_HUMAN]	232.67	6.47	1	2	4	5	897	101.322	5.0083
P48739	Phosphatidylinositol transfer protein beta isoform OS=Homo sapiens GN=PITPNB PE=1 SV=2 - [PIPNB_HUMAN]	232.63	32.1	1	4	5	7	271	31.5199	6.87354
O75832	26S proteasome non-ATPase regulatory subunit 10 OS=Homo sapiens GN=PSMD10 PE=1 SV=1 - [PSD10_HUMAN]	232.4	21.24	1	3	3	4	226	24.4124	6.1001
O14828	Secretory carrier-associated membrane protein 3 OS=Homo sapiens GN=SCAMP3 PE=1 SV=3 - [SCAM3_HUMAN]	232.38	12.97	1	3	3	4	347	38.2623	7.63525
P18124	60S ribosomal protein L7 OS=Homo sapiens GN=RPL7 PE=1 SV=1 - [RL7_HUMAN]	231.91	32.26	1	6	6	6	248	29.2072	10.6528
P54760	Ephrin type-B receptor 4 OS=Homo sapiens GN=EPHB4 PE=1 SV=2 - [EPHB4_HUMAN]	231.91	7.4	6	3	6	6	987	108.201	6.90283
Q9P0V9	Septin-10 OS=Homo sapiens GN=SEPT10 PE=1 SV=2 - [SEP10_HUMAN]	231.53	15.42	1	3	5	6	454	52.5596	6.80029
Q13867	Bleomycin hydrolase OS=Homo sapiens GN=BLMH PE=1 SV=1 - [BLMH_HUMAN]	231	20.44	1	5	5	6	455	52.528	6.26514
P35270	Sepiapterin reductase OS=Homo sapiens GN=SPR PE=1 SV=1 - [SPRE_HUMAN]	230.77	21.07	1	3	3	4	261	28.0308	8.04541
P21291	Cysteine and glycine-rich protein 1 OS=Homo sapiens GN=CSRP1 PE=1 SV=3 - [CSRP1_HUMAN]	230.43	25.39	1	3	3	4	193	20.5538	8.57275
P46060	Ran GTPase-activating protein 1 OS=Homo sapiens GN=RANGAP1 PE=1 SV=1 - [RAGP1_HUMAN]	230.31	12.44	1	5	5	6	587	63.5023	4.67822
P62495	Eukaryotic peptide chain release factor subunit 1 OS=Homo sapiens GN=ETF1 PE=1 SV=3 - [ERF1_HUMAN]	230.12	18.08	1	6	6	6	437	49.0002	5.70654
P19367	Hexokinase-1 OS=Homo sapiens GN=HK1 PE=1 SV=3 - [HXK1_HUMAN]	230.07	6.76	1	4	5	5	917	102.42	6.80029
Q15836	Vesicle-associated membrane protein 3 OS=Homo sapiens GN=VAMP3 PE=1 SV=3 - [VAMP3_HUMAN]	229.15	24	2	2	2	3	100	11.302	8.79248
Q8NBS9	Thioredoxin domain-containing protein 5 OS=Homo sapiens GN=TXNDC5 PE=1 SV=2 - [TXND5_HUMAN]	228.3	24.31	1	6	6	6	432	47.5987	5.97314
Q9Y4G6	Talin-2 OS=Homo sapiens GN=TLN2 PE=1 SV=4 - [TLN2_HUMAN]	227.95	2.52	1	2	5	7	2542	271.443	5.56689
P49419	Alpha-aminoadipic semialdehyde dehydrogenase OS=Homo sapiens GN=ALDH7A1 PE=1 SV=5 - [AL7A1_HUMAN]	227.51	10.39	1	4	4	4	539	58.4501	7.98682
Q9BZ67	FERM domain-containing protein 8 OS=Homo sapiens GN=FRMD8 PE=1 SV=1 - [FRMD8_HUMAN]	227.38	10.99	1	2	2	3	464	51.1862	6.22705
P04844	Dolichyl-diphosphooligosaccharide--protein glycosyltransferase subunit 2 OS=Homo sapiens GN=RPN2 PE=1 SV=3 - [RPN2_HUMAN]	226.99	14.74	1	5	5	5	631	69.241	5.69385
Q9UBI6	Guanine nucleotide-binding protein G(I)/G(S)/G(O) subunit gamma-12 OS=Homo sapiens GN=GNG12 PE=1 SV=3 - [GBG12_HUMAN]	226.91	50	1	4	4	5	72	8.00117	8.96826
Q93008	Probable ubiquitin carboxyl-terminal hydrolase FAF-X OS=Homo sapiens GN=USP9X PE=1 SV=3 - [USP9X_HUMAN]	226.63	3.5	2	5	5	6	2570	292.094	5.79541
P09960	Leukotriene A-4 hydrolase OS=Homo sapiens GN=LTA4H PE=1 SV=2 - [LKHA4_HUMAN]	226.56	13.58	1	6	6	6	611	69.2412	6.17627
Q9ULC3	Ras-related protein Rab-23 OS=Homo sapiens GN=RAB23 PE=1 SV=1 - [RAB23_HUMAN]	226.43	24.05	2	4	5	5	237	26.6425	6.59521
P62847	40S ribosomal protein S24 OS=Homo sapiens GN=RPS24 PE=1 SV=1 - [RS24_HUMAN]	226.35	28.57	1	3	3	5	133	15.4134	10.7847
O75643	U5 small nuclear ribonucleoprotein 200 kDa helicase OS=Homo sapiens GN=SNRNP200 PE=1 SV=2 - [U520_HUMAN]	226	2.62	1	4	4	4	2136	244.353	6.06201
P31689	DnaJ homolog subfamily A member 1 OS=Homo sapiens GN=DNAJA1 PE=1 SV=2 - [DNJA1_HUMAN]	225.84	27.2	1	6	6	8	397	44.8395	7.07861
P04843	Dolichyl-diphosphooligosaccharide--protein glycosyltransferase subunit 1 OS=Homo sapiens GN=RPN1 PE=1 SV=1 - [RPN1_HUMAN]	225.75	19.6	1	8	8	8	607	68.5268	6.37939
P46926	Glucosamine-6-phosphate isomerase 1 OS=Homo sapiens GN=GNPDA1 PE=1 SV=1 - [GNPI1_HUMAN]	225.71	28.72	2	5	5	5	289	32.6476	6.91748
O60684	Importin subunit alpha-7 OS=Homo sapiens GN=KPNA6 PE=1 SV=1 - [IMA7_HUMAN]	225.38	10.63	2	2	4	5	536	59.9915	4.98291
Q16363	Laminin subunit alpha-4 OS=Homo sapiens GN=LAMA4 PE=1 SV=4 - [LAMA4_HUMAN]	225.34	4.94	1	5	5	6	1823	202.397	6.27783
Q96JB6	Lysyl oxidase homolog 4 OS=Homo sapiens GN=LOXL4 PE=1 SV=1 - [LOXL4_HUMAN]	225.27	9.52	1	4	4	4	756	84.4291	7.45947
Q9UN86	Ras GTPase-activating protein-binding protein 2 OS=Homo sapiens GN=G3BP2 PE=1 SV=2 - [G3BP2_HUMAN]	224.72	12.66	1	3	3	6	482	54.0878	5.5542
Q14254	Flotillin-2 OS=Homo sapiens GN=FLOT2 PE=1 SV=2 - [FLOT2_HUMAN]	224.25	16.36	1	5	5	5	428	47.0347	5.24951
P61978	Heterogeneous nuclear ribonucleoprotein K OS=Homo sapiens GN=HNRNPK PE=1 SV=1 - [HNRPK_HUMAN]	223.61	16.2	1	5	5	6	463	50.9444	5.5415
Q6IBS0	Twinfilin-2 OS=Homo sapiens GN=TWF2 PE=1 SV=2 - [TWF2_HUMAN]	221.98	16.33	1	3	3	3	349	39.5233	6.84424
O00505	Importin subunit alpha-3 OS=Homo sapiens GN=KPNA3 PE=1 SV=2 - [IMA3_HUMAN]	221.86	19.19	1	3	6	8	521	57.7748	4.94482
P78410	Butyrophilin subfamily 3 member A2 OS=Homo sapiens GN=BTN3A2 PE=1 SV=2 - [BT3A2_HUMAN]	221.59	16.47	2	1	3	5	334	36.4046	5.32568
O15511	Actin-related protein 2/3 complex subunit 5 OS=Homo sapiens GN=ARPC5 PE=1 SV=3 - [ARPC5_HUMAN]	221.47	29.14	1	3	3	3	151	16.3103	5.66846
Q5ZPR3	CD276 antigen OS=Homo sapiens GN=CD276 PE=1 SV=1 - [CD276_HUMAN]	221.31	6.37	1	2	2	3	534	57.1995	4.90674
Q99623	Prohibitin-2 OS=Homo sapiens GN=PHB2 PE=1 SV=2 - [PHB2_HUMAN]	221.22	22.41	1	5	5	6	299	33.2759	9.83252
P27824	Calnexin OS=Homo sapiens GN=CANX PE=1 SV=2 - [CALX_HUMAN]	220.6	13.51	1	6	6	6	592	67.5259	4.60205
Q8NEU8	DCC-interacting protein 13-beta OS=Homo sapiens GN=APPL2 PE=1 SV=3 - [DP13B_HUMAN]	220.06	14.91	1	5	6	6	664	74.4463	4.94482
Q9UBF2	Coatomer subunit gamma-2 OS=Homo sapiens GN=COPG2 PE=1 SV=1 - [COPG2_HUMAN]	220.04	6.2	1	2	3	4	871	97.5596	5.80811
Q9NZN3	EH domain-containing protein 3 OS=Homo sapiens GN=EHD3 PE=1 SV=2 - [EHD3_HUMAN]	219.99	13.08	1	1	6	6	535	60.8487	6.56592
P53794	Sodium/myo-inositol cotransporter OS=Homo sapiens GN=SLC5A3 PE=3 SV=2 - [SC5A3_HUMAN]	219.86	11.42	1	4	4	5	718	79.6413	7.26904
Q6IA86	Elongator complex protein 2 OS=Homo sapiens GN=ELP2 PE=1 SV=2 - [ELP2_HUMAN]	219.84	7.87	1	4	4	6	826	92.4409	5.96045
Q15393	Splicing factor 3B subunit 3 OS=Homo sapiens GN=SF3B3 PE=1 SV=4 - [SF3B3_HUMAN]	219.75	7.15	1	5	6	6	1217	135.492	5.26221
Q03135	Caveolin-1 OS=Homo sapiens GN=CAV1 PE=1 SV=4 - [CAV1_HUMAN]	219.56	24.16	1	3	3	5	178	20.4585	6.02393
O76094	Signal recognition particle 72 kDa protein OS=Homo sapiens GN=SRP72 PE=1 SV=3 - [SRP72_HUMAN]	219.05	7.3	1	3	3	4	671	74.56	9.26123
P00387	NADH-cytochrome b5 reductase 3 OS=Homo sapiens GN=CYB5R3 PE=1 SV=3 - [NB5R3_HUMAN]	218.87	15.95	1	3	3	5	301	34.2127	7.59131
P35625	Metalloproteinase inhibitor 3 OS=Homo sapiens GN=TIMP3 PE=1 SV=2 - [TIMP3_HUMAN]	218.81	25.59	1	4	4	6	211	24.1288	8.71924
P05026	Sodium/potassium-transporting ATPase subunit beta-1 OS=Homo sapiens GN=ATP1B1 PE=1 SV=1 - [AT1B1_HUMAN]	218.77	18.81	1	4	4	5	303	35.0389	8.52881
Q9Y285	Phenylalanine--tRNA ligase alpha subunit OS=Homo sapiens GN=FARSA PE=1 SV=3 - [SYFA_HUMAN]	218.21	16.73	1	5	5	5	508	57.5275	7.79639
Q92688	Acidic leucine-rich nuclear phosphoprotein 32 family member B OS=Homo sapiens GN=ANP32B PE=1 SV=1 - [AN32B_HUMAN]	217.31	19.52	4	4	4	4	251	28.7703	4.05615
Q9P289	Serine/threonine-protein kinase MST4 OS=Homo sapiens GN=MST4 PE=1 SV=2 - [MST4_HUMAN]	216.77	11.06	2	2	4	5	416	46.4996	5.2876
P07686	Beta-hexosaminidase subunit beta OS=Homo sapiens GN=HEXB PE=1 SV=3 - [HEXB_HUMAN]	216.55	6.65	1	3	3	5	556	63.0712	6.75635
Q00688	Peptidyl-prolyl cis-trans isomerase FKBP3 OS=Homo sapiens GN=FKBP3 PE=1 SV=1 - [FKBP3_HUMAN]	216.19	17.86	1	3	3	5	224	25.1613	9.27588
Q13838	Spliceosome RNA helicase DDX39B OS=Homo sapiens GN=DDX39B PE=1 SV=1 - [DX39B_HUMAN]	215.99	23.36	2	6	6	7	428	48.9599	5.66846
Q16543	Hsp90 co-chaperone Cdc37 OS=Homo sapiens GN=CDC37 PE=1 SV=1 - [CDC37_HUMAN]	215.05	16.67	1	4	4	4	378	44.44	5.24951
P23246	Splicing factor, proline- and glutamine-rich OS=Homo sapiens GN=SFPQ PE=1 SV=2 - [SFPQ_HUMAN]	214.78	7.07	1	3	3	3	707	76.1016	9.43701
O95219	Sorting nexin-4 OS=Homo sapiens GN=SNX4 PE=1 SV=1 - [SNX4_HUMAN]	214.59	8.44	1	3	3	3	450	51.8761	5.98584
Q9BT78	COP9 signalosome complex subunit 4 OS=Homo sapiens GN=COPS4 PE=1 SV=1 - [CSN4_HUMAN]	214.47	12.32	1	3	3	3	406	46.2397	5.8335
O95336	6-phosphogluconolactonase OS=Homo sapiens GN=PGLS PE=1 SV=2 - [6PGL_HUMAN]	214.4	26.36	1	4	4	5	258	27.5296	6.04932
Q14444	Caprin-1 OS=Homo sapiens GN=CAPRIN1 PE=1 SV=2 - [CAPR1_HUMAN]	214.16	12.27	1	4	4	5	709	78.318	5.24951
Q9NQR4	Omega-amidase NIT2 OS=Homo sapiens GN=NIT2 PE=1 SV=1 - [NIT2_HUMAN]	214.06	17.39	1	3	3	6	276	30.5886	7.21045
Q9Y5X1	Sorting nexin-9 OS=Homo sapiens GN=SNX9 PE=1 SV=1 - [SNX9_HUMAN]	214.02	11.26	1	4	4	4	595	66.5496	5.57959
P62333	26S protease regulatory subunit 10B OS=Homo sapiens GN=PSMC6 PE=1 SV=1 - [PRS10_HUMAN]	213.68	17.22	1	5	5	5	389	44.1451	7.48877
O14936	Peripheral plasma membrane protein CASK OS=Homo sapiens GN=CASK PE=1 SV=3 - [CSKP_HUMAN]	213.66	10.48	1	7	7	7	926	105.056	6.43018
Q9UN36	Protein NDRG2 OS=Homo sapiens GN=NDRG2 PE=1 SV=2 - [NDRG2_HUMAN]	213.39	18.87	1	4	4	5	371	40.7722	5.21143
P49720	Proteasome subunit beta type-3 OS=Homo sapiens GN=PSMB3 PE=1 SV=2 - [PSB3_HUMAN]	212.57	32.2	1	4	4	5	205	22.9335	6.55127
Q9HDC9	Adipocyte plasma membrane-associated protein OS=Homo sapiens GN=APMAP PE=1 SV=2 - [APMAP_HUMAN]	211.86	16.59	1	4	4	5	416	46.4509	6.16357
P62244	40S ribosomal protein S15a OS=Homo sapiens GN=RPS15A PE=1 SV=2 - [RS15A_HUMAN]	211.77	40	1	4	4	4	130	14.83	10.1255
O00625	Pirin OS=Homo sapiens GN=PIR PE=1 SV=1 - [PIR_HUMAN]	211.29	12.07	1	2	2	6	290	32.0933	6.91748
P10301	Ras-related protein R-Ras OS=Homo sapiens GN=RRAS PE=1 SV=1 - [RRAS_HUMAN]	210.81	21.56	1	3	3	4	218	23.4659	6.93213
P11388	DNA topoisomerase 2-alpha OS=Homo sapiens GN=TOP2A PE=1 SV=3 - [TOP2A_HUMAN]	210.57	2.61	1	2	2	3	1531	174.276	8.71924
O60503	Adenylate cyclase type 9 OS=Homo sapiens GN=ADCY9 PE=1 SV=4 - [ADCY9_HUMAN]	210.55	4.8	1	4	4	4	1353	150.604	7.34229
Q07065	Cytoskeleton-associated protein 4 OS=Homo sapiens GN=CKAP4 PE=1 SV=2 - [CKAP4_HUMAN]	210.37	9.47	1	4	4	4	602	65.9827	5.92236
P00813	Adenosine deaminase OS=Homo sapiens GN=ADA PE=1 SV=3 - [ADA_HUMAN]	210.18	12.67	1	2	2	4	363	40.7387	5.94775
P11172	Uridine 5'-monophosphate synthase OS=Homo sapiens GN=UMPS PE=1 SV=1 - [UMPS_HUMAN]	210.09	13.33	1	4	4	4	480	52.1886	7.23975
Q9NZW5	MAGUK p55 subfamily member 6 OS=Homo sapiens GN=MPP6 PE=1 SV=2 - [MPP6_HUMAN]	209.6	12.41	1	5	5	5	540	61.0788	6.17627
P62191	26S protease regulatory subunit 4 OS=Homo sapiens GN=PSMC1 PE=1 SV=1 - [PRS4_HUMAN]	209.3	14.55	1	4	4	4	440	49.1537	6.21436
Q9Y2D4	Exocyst complex component 6B OS=Homo sapiens GN=EXOC6B PE=1 SV=3 - [EXC6B_HUMAN]	209.22	9.74	1	5	5	5	811	94.1411	6.45557
O00743	Serine/threonine-protein phosphatase 6 catalytic subunit OS=Homo sapiens GN=PPP6C PE=1 SV=1 - [PPP6_HUMAN]	209.18	11.15	1	2	2	3	305	35.1215	5.69385
Q3LXA3	Bifunctional ATP-dependent dihydroxyacetone kinase/FAD-AMP lyase (cyclizing) OS=Homo sapiens GN=DAK PE=1 SV=2 - [DHAK_HUMAN]	209.08	11.65	1	4	4	4	575	58.91	7.48877
Q13155	Aminoacyl tRNA synthase complex-interacting multifunctional protein 2 OS=Homo sapiens GN=AIMP2 PE=1 SV=2 - [AIMP2_HUMAN]	208.79	20.94	1	4	4	4	320	35.3263	8.22119
Q15058	Kinesin-like protein KIF14 OS=Homo sapiens GN=KIF14 PE=1 SV=1 - [KIF14_HUMAN]	208.62	4.19	1	5	5	6	1648	186.375	7.91357
Q9Y277	Voltage-dependent anion-selective channel protein 3 OS=Homo sapiens GN=VDAC3 PE=1 SV=1 - [VDAC3_HUMAN]	208.61	12.01	1	2	3	4	283	30.6393	8.66064
P51570	Galactokinase OS=Homo sapiens GN=GALK1 PE=1 SV=1 - [GALK1_HUMAN]	208.41	18.37	1	3	3	4	392	42.2456	6.45557
O15118	Niemann-Pick C1 protein OS=Homo sapiens GN=NPC1 PE=1 SV=2 - [NPC1_HUMAN]	208.13	4.46	1	4	4	5	1278	142.074	5.36377
Q9ULT8	E3 ubiquitin-protein ligase HECTD1 OS=Homo sapiens GN=HECTD1 PE=1 SV=3 - [HECD1_HUMAN]	206.6	1.72	1	2	2	3	2610	289.203	5.35107
Q9NVJ2	ADP-ribosylation factor-like protein 8B OS=Homo sapiens GN=ARL8B PE=1 SV=1 - [ARL8B_HUMAN]	206.47	30.11	2	4	4	5	186	21.5251	8.42627
P46459	Vesicle-fusing ATPase OS=Homo sapiens GN=NSF PE=1 SV=3 - [NSF_HUMAN]	206.4	14.11	1	7	7	7	744	82.5421	6.94678
P12004	Proliferating cell nuclear antigen OS=Homo sapiens GN=PCNA PE=1 SV=1 - [PCNA_HUMAN]	206.35	25.67	1	5	5	5	261	28.7503	4.69092
P09429	High mobility group protein B1 OS=Homo sapiens GN=HMGB1 PE=1 SV=3 - [HMGB1_HUMAN]	206.3	14.88	1	2	2	4	215	24.8782	5.74463
Q9UHX1	Poly(U)-binding-splicing factor PUF60 OS=Homo sapiens GN=PUF60 PE=1 SV=1 - [PUF60_HUMAN]	206.18	14.49	1	3	3	3	559	59.8376	5.2876
P23588	Eukaryotic translation initiation factor 4B OS=Homo sapiens GN=EIF4B PE=1 SV=2 - [IF4B_HUMAN]	206.08	13.09	1	4	4	4	611	69.1103	5.73193
P23921	Ribonucleoside-diphosphate reductase large subunit OS=Homo sapiens GN=RRM1 PE=1 SV=1 - [RIR1_HUMAN]	205.94	10.23	1	4	4	5	792	90.0125	7.15186
P55036	26S proteasome non-ATPase regulatory subunit 4 OS=Homo sapiens GN=PSMD4 PE=1 SV=1 - [PSMD4_HUMAN]	205.89	16.18	2	4	4	4	377	40.7112	4.79248
Q8NG11	Tetraspanin-14 OS=Homo sapiens GN=TSPAN14 PE=1 SV=1 - [TSN14_HUMAN]	205.66	11.85	1	2	2	3	270	30.6706	6.84424
P16930	Fumarylacetoacetase OS=Homo sapiens GN=FAH PE=1 SV=2 - [FAAA_HUMAN]	205.49	21.48	1	5	5	5	419	46.3442	6.94678
P32119	Peroxiredoxin-2 OS=Homo sapiens GN=PRDX2 PE=1 SV=5 - [PRDX2_HUMAN]	205.42	35.86	1	4	5	6	198	21.8782	5.97314
P10599	Thioredoxin OS=Homo sapiens GN=TXN PE=1 SV=3 - [THIO_HUMAN]	204.89	40.95	1	4	4	6	105	11.7297	4.91943
P39656	Dolichyl-diphosphooligosaccharide--protein glycosyltransferase 48 kDa subunit OS=Homo sapiens GN=DDOST PE=1 SV=4 - [OST48_HUMAN]	204.65	21.49	1	6	6	6	456	50.769	6.55127
Q00169	Phosphatidylinositol transfer protein alpha isoform OS=Homo sapiens GN=PITPNA PE=1 SV=2 - [PIPNA_HUMAN]	204.38	11.11	1	2	2	5	270	31.786	6.55127
O43681	ATPase ASNA1 OS=Homo sapiens GN=ASNA1 PE=1 SV=2 - [ASNA_HUMAN]	204.17	27.01	1	6	6	6	348	38.7674	4.90674
P62249	40S ribosomal protein S16 OS=Homo sapiens GN=RPS16 PE=1 SV=2 - [RS16_HUMAN]	204.14	28.08	1	4	4	7	146	16.435	10.2134
O75915	PRA1 family protein 3 OS=Homo sapiens GN=ARL6IP5 PE=1 SV=1 - [PRAF3_HUMAN]	203.82	20.74	1	3	3	4	188	21.6004	9.77393
P52943	Cysteine-rich protein 2 OS=Homo sapiens GN=CRIP2 PE=1 SV=1 - [CRIP2_HUMAN]	202.66	32.21	1	3	3	3	208	22.478	8.71924
P40616	ADP-ribosylation factor-like protein 1 OS=Homo sapiens GN=ARL1 PE=1 SV=1 - [ARL1_HUMAN]	201.89	22.65	1	3	3	5	181	20.4044	5.71924
Q16537	Serine/threonine-protein phosphatase 2A 56 kDa regulatory subunit epsilon isoform OS=Homo sapiens GN=PPP2R5E PE=1 SV=1 - [2A5E_HUMAN]	201.64	14.56	1	5	5	6	467	54.6645	6.94678
Q13464	Rho-associated protein kinase 1 OS=Homo sapiens GN=ROCK1 PE=1 SV=1 - [ROCK1_HUMAN]	201.22	4.73	1	4	6	7	1354	158.076	5.89697
Q04721	Neurogenic locus notch homolog protein 2 OS=Homo sapiens GN=NOTCH2 PE=1 SV=3 - [NOTC2_HUMAN]	199.84	3.08	2	5	5	5	2471	265.226	5.13525
Q96RT1	Protein LAP2 OS=Homo sapiens GN=ERBB2IP PE=1 SV=2 - [LAP2_HUMAN]	199.78	2.9	1	3	3	4	1412	158.2	5.50342
P29144	Tripeptidyl-peptidase 2 OS=Homo sapiens GN=TPP2 PE=1 SV=4 - [TPP2_HUMAN]	198.95	8.41	1	6	6	7	1249	138.263	6.31592
Q9Y639	Neuroplastin OS=Homo sapiens GN=NPTN PE=1 SV=2 - [NPTN_HUMAN]	198.84	11.56	1	4	4	6	398	44.3595	7.98682
O60486	Plexin-C1 OS=Homo sapiens GN=PLXNC1 PE=1 SV=1 - [PLXC1_HUMAN]	197.68	3.13	1	3	3	3	1568	175.63	7.60596
Q13765	Nascent polypeptide-associated complex subunit alpha OS=Homo sapiens GN=NACA PE=1 SV=1 - [NACA_HUMAN]	197.36	20.47	2	3	3	3	215	23.3697	4.56396
P22061	Protein-L-isoaspartate(D-aspartate) O-methyltransferase OS=Homo sapiens GN=PCMT1 PE=1 SV=4 - [PIMT_HUMAN]	196.26	35.24	1	4	4	5	227	24.6206	7.21045
P30740	Leukocyte elastase inhibitor OS=Homo sapiens GN=SERPINB1 PE=1 SV=1 - [ILEU_HUMAN]	196.17	6.33	1	2	2	4	379	42.7147	6.27783
Q9UPN3	Microtubule-actin cross-linking factor 1, isoforms 1/2/3/5 OS=Homo sapiens GN=MACF1 PE=1 SV=4 - [MACF1_HUMAN]	196.07	1.15	1	5	5	5	7388	837.787	5.38916
Q99598	Translin-associated protein X OS=Homo sapiens GN=TSNAX PE=1 SV=1 - [TSNAX_HUMAN]	195.26	23.79	1	4	4	4	290	33.0917	6.55127
P21796	Voltage-dependent anion-selective channel protein 1 OS=Homo sapiens GN=VDAC1 PE=1 SV=2 - [VDAC1_HUMAN]	195.21	14.84	1	3	4	5	283	30.7536	8.54346
Q13131	5'-AMP-activated protein kinase catalytic subunit alpha-1 OS=Homo sapiens GN=PRKAA1 PE=1 SV=4 - [AAPK1_HUMAN]	194.9	7.33	2	3	3	4	559	63.9686	8.11865
O15372	Eukaryotic translation initiation factor 3 subunit H OS=Homo sapiens GN=EIF3H PE=1 SV=1 - [EIF3H_HUMAN]	194.08	17.9	1	4	4	4	352	39.9051	6.53662
P08397	Porphobilinogen deaminase OS=Homo sapiens GN=HMBS PE=1 SV=2 - [HEM3_HUMAN]	193.97	15.51	1	3	3	4	361	39.3056	7.18115
Q15418	Ribosomal protein S6 kinase alpha-1 OS=Homo sapiens GN=RPS6KA1 PE=1 SV=2 - [KS6A1_HUMAN]	193.91	11.02	3	2	5	5	735	82.6708	7.82568
Q9Y6C9	Mitochondrial carrier homolog 2 OS=Homo sapiens GN=MTCH2 PE=1 SV=1 - [MTCH2_HUMAN]	193.56	11.22	1	2	2	3	303	33.3089	7.97217
P68400	Casein kinase II subunit alpha OS=Homo sapiens GN=CSNK2A1 PE=1 SV=1 - [CSK21_HUMAN]	193.49	19.95	2	4	4	5	391	45.1148	7.73779
P16435	NADPH--cytochrome P450 reductase OS=Homo sapiens GN=POR PE=1 SV=2 - [NCPR_HUMAN]	193.18	8.27	1	3	3	4	677	76.6413	5.57959
P46783	40S ribosomal protein S10 OS=Homo sapiens GN=RPS10 PE=1 SV=1 - [RS10_HUMAN]	193.01	23.03	2	3	3	4	165	18.8859	10.1548
P62277	40S ribosomal protein S13 OS=Homo sapiens GN=RPS13 PE=1 SV=2 - [RS13_HUMAN]	192.96	28.48	1	4	4	6	151	17.2117	10.5356
P40939	Trifunctional enzyme subunit alpha, mitochondrial OS=Homo sapiens GN=HADHA PE=1 SV=2 - [ECHA_HUMAN]	192.79	9.7	1	4	4	4	763	82.9469	9.0415
P62195	26S protease regulatory subunit 8 OS=Homo sapiens GN=PSMC5 PE=1 SV=1 - [PRS8_HUMAN]	192.61	17.73	1	5	5	5	406	45.5971	7.54736
O43237	Cytoplasmic dynein 1 light intermediate chain 2 OS=Homo sapiens GN=DYNC1LI2 PE=1 SV=1 - [DC1L2_HUMAN]	192.27	13.01	1	2	2	3	492	54.0655	6.37939
P63167	Dynein light chain 1, cytoplasmic OS=Homo sapiens GN=DYNLL1 PE=1 SV=1 - [DYL1_HUMAN]	192.11	37.08	2	2	2	3	89	10.3591	7.40088
Q9Y5X3	Sorting nexin-5 OS=Homo sapiens GN=SNX5 PE=1 SV=1 - [SNX5_HUMAN]	191.5	14.36	1	5	5	5	404	46.7872	6.75635
Q63HN8	E3 ubiquitin-protein ligase RNF213 OS=Homo sapiens GN=RNF213 PE=1 SV=3 - [RN213_HUMAN]	191.49	1.79	1	4	5	5	5207	591.03	6.48096
Q96A65	Exocyst complex component 4 OS=Homo sapiens GN=EXOC4 PE=1 SV=1 - [EXOC4_HUMAN]	191.33	8.21	1	5	5	5	974	110.429	6.49365
Q15293	Reticulocalbin-1 OS=Homo sapiens GN=RCN1 PE=1 SV=1 - [RCN1_HUMAN]	191.3	19.34	1	3	3	3	331	38.8662	4.99561
Q16576	Histone-binding protein RBBP7 OS=Homo sapiens GN=RBBP7 PE=1 SV=1 - [RBBP7_HUMAN]	191.11	11.29	1	1	4	5	425	47.7902	5.04639
Q96CC6	Inactive rhomboid protein 1 OS=Homo sapiens GN=RHBDF1 PE=1 SV=2 - [RHDF1_HUMAN]	190.43	4.8	1	2	2	5	855	97.3385	8.44092
O15344	Midline-1 OS=Homo sapiens GN=MID1 PE=1 SV=1 - [TRI18_HUMAN]	189.59	3.75	1	2	2	3	667	75.2026	6.80029
Q15185	Prostaglandin E synthase 3 OS=Homo sapiens GN=PTGES3 PE=1 SV=1 - [TEBP_HUMAN]	188.27	26.25	1	3	3	4	160	18.6854	4.53857
Q86UX2	Inter-alpha-trypsin inhibitor heavy chain H5 OS=Homo sapiens GN=ITIH5 PE=2 SV=2 - [ITIH5_HUMAN]	188.14	6.48	1	5	5	6	942	104.512	8.27979
P14324	Farnesyl pyrophosphate synthase OS=Homo sapiens GN=FDPS PE=1 SV=4 - [FPPS_HUMAN]	187.34	9.79	1	3	3	4	419	48.2446	6.15088
O00401	Neural Wiskott-Aldrich syndrome protein OS=Homo sapiens GN=WASL PE=1 SV=2 - [WASL_HUMAN]	187.34	9.5	1	3	3	3	505	54.7927	7.92822
P17844	Probable ATP-dependent RNA helicase DDX5 OS=Homo sapiens GN=DDX5 PE=1 SV=1 - [DDX5_HUMAN]	187.18	7.49	1	2	4	4	614	69.1047	8.92432
P62917	60S ribosomal protein L8 OS=Homo sapiens GN=RPL8 PE=1 SV=2 - [RL8_HUMAN]	186.93	30.35	1	4	4	4	257	28.0073	11.0337
O15540	Fatty acid-binding protein, brain OS=Homo sapiens GN=FABP7 PE=1 SV=3 - [FABP7_HUMAN]	186.92	22.73	1	2	2	3	132	14.8795	5.59229
Q96PY5	Formin-like protein 2 OS=Homo sapiens GN=FMNL2 PE=1 SV=3 - [FMNL2_HUMAN]	186.86	4.79	2	4	4	4	1086	123.243	7.40088
P62826	GTP-binding nuclear protein Ran OS=Homo sapiens GN=RAN PE=1 SV=3 - [RAN_HUMAN]	186.71	26.39	1	5	5	6	216	24.4076	7.48877
P26373	60S ribosomal protein L13 OS=Homo sapiens GN=RPL13 PE=1 SV=4 - [RL13_HUMAN]	186.56	22.75	1	5	5	5	211	24.2465	11.6489
Q96PD2	Discoidin, CUB and LCCL domain-containing protein 2 OS=Homo sapiens GN=DCBLD2 PE=1 SV=1 - [DCBD2_HUMAN]	186.28	8.13	1	4	4	4	775	84.9808	7.1665
Q96P70	Importin-9 OS=Homo sapiens GN=IPO9 PE=1 SV=3 - [IPO9_HUMAN]	185.47	8.84	1	4	4	4	1041	115.889	4.80518
Q13404	Ubiquitin-conjugating enzyme E2 variant 1 OS=Homo sapiens GN=UBE2V1 PE=1 SV=2 - [UB2V1_HUMAN]	185.4	23.81	2	3	3	3	147	16.4843	7.92822
P62266	40S ribosomal protein S23 OS=Homo sapiens GN=RPS23 PE=1 SV=3 - [RS23_HUMAN]	184.97	39.86	1	4	4	5	143	15.7977	10.4917
O60749	Sorting nexin-2 OS=Homo sapiens GN=SNX2 PE=1 SV=2 - [SNX2_HUMAN]	184.97	10.21	1	4	5	5	519	58.4347	5.12256
Q14166	Tubulin--tyrosine ligase-like protein 12 OS=Homo sapiens GN=TTLL12 PE=1 SV=2 - [TTL12_HUMAN]	184.31	10.56	1	4	4	4	644	74.356	5.52881
Q8IWB7	WD repeat and FYVE domain-containing protein 1 OS=Homo sapiens GN=WDFY1 PE=1 SV=1 - [WDFY1_HUMAN]	183.99	18.29	1	5	5	5	410	46.2933	7.32764
P54802	Alpha-N-acetylglucosaminidase OS=Homo sapiens GN=NAGLU PE=1 SV=2 - [ANAG_HUMAN]	182.73	5.11	1	2	2	3	743	82.2136	6.65381
P68402	Platelet-activating factor acetylhydrolase IB subunit beta OS=Homo sapiens GN=PAFAH1B2 PE=1 SV=1 - [PA1B2_HUMAN]	182.32	12.23	1	2	2	3	229	25.5531	5.92236
Q9UNF1	Melanoma-associated antigen D2 OS=Homo sapiens GN=MAGED2 PE=1 SV=2 - [MAGD2_HUMAN]	182.11	12.71	2	5	5	6	606	64.9144	9.31982
Q16563	Synaptophysin-like protein 1 OS=Homo sapiens GN=SYPL1 PE=1 SV=1 - [SYPL1_HUMAN]	181.88	19.69	1	3	3	4	259	28.5467	8.42627
Q14232	Translation initiation factor eIF-2B subunit alpha OS=Homo sapiens GN=EIF2B1 PE=1 SV=1 - [EI2BA_HUMAN]	181.87	13.77	1	4	4	4	305	33.6908	7.32764
Q9ULL4	Plexin-B3 OS=Homo sapiens GN=PLXNB3 PE=1 SV=2 - [PLXB3_HUMAN]	180.87	4.71	1	5	5	5	1909	206.716	6.40479
P27361	Mitogen-activated protein kinase 3 OS=Homo sapiens GN=MAPK3 PE=1 SV=4 - [MK03_HUMAN]	180.71	19.53	1	1	4	5	379	43.1081	6.7417
Q92841	Probable ATP-dependent RNA helicase DDX17 OS=Homo sapiens GN=DDX17 PE=1 SV=2 - [DDX17_HUMAN]	180.65	5.21	1	1	3	3	729	80.222	8.26514
P05455	Lupus La protein OS=Homo sapiens GN=SSB PE=1 SV=2 - [LA_HUMAN]	180.33	7.84	1	4	4	4	408	46.8082	7.12256
P63000	Ras-related C3 botulinum toxin substrate 1 OS=Homo sapiens GN=RAC1 PE=1 SV=1 - [RAC1_HUMAN]	180.32	14.58	1	2	2	6	192	21.4362	8.49951
Q9H7F0	Probable cation-transporting ATPase 13A3 OS=Homo sapiens GN=ATP13A3 PE=1 SV=4 - [AT133_HUMAN]	180.25	6.85	1	5	5	5	1226	137.953	6.63916
Q9Y5L0	Transportin-3 OS=Homo sapiens GN=TNPO3 PE=1 SV=3 - [TNPO3_HUMAN]	179.98	8.34	1	4	4	5	923	104.136	5.56689
O95425	Supervillin OS=Homo sapiens GN=SVIL PE=1 SV=2 - [SVIL_HUMAN]	179.95	2.39	1	3	3	5	2214	247.593	6.97607
P34896	Serine hydroxymethyltransferase, cytosolic OS=Homo sapiens GN=SHMT1 PE=1 SV=1 - [GLYC_HUMAN]	179.76	9.32	1	2	3	3	483	53.049	7.7085
Q15437	Protein transport protein Sec23B OS=Homo sapiens GN=SEC23B PE=1 SV=2 - [SC23B_HUMAN]	179.22	3.91	1	1	2	3	767	86.4235	6.88818
Q53GQ0	Very-long-chain 3-oxoacyl-CoA reductase OS=Homo sapiens GN=HSD17B12 PE=1 SV=2 - [DHB12_HUMAN]	179.12	21.79	1	5	5	7	312	34.3022	9.31982
P68036	Ubiquitin-conjugating enzyme E2 L3 OS=Homo sapiens GN=UBE2L3 PE=1 SV=1 - [UB2L3_HUMAN]	179.06	24.03	2	2	2	3	154	17.8502	8.51416
Q7L7X3	Serine/threonine-protein kinase TAO1 OS=Homo sapiens GN=TAOK1 PE=1 SV=1 - [TAOK1_HUMAN]	178.53	5.99	1	3	4	5	1001	115.997	7.6499
P20645	Cation-dependent mannose-6-phosphate receptor OS=Homo sapiens GN=M6PR PE=1 SV=1 - [MPRD_HUMAN]	178.34	11.55	1	2	2	2	277	30.9734	5.8335
P49755	Transmembrane emp24 domain-containing protein 10 OS=Homo sapiens GN=TMED10 PE=1 SV=2 - [TMEDA_HUMAN]	178.12	16.44	1	3	3	4	219	24.96	7.44482
Q15042	Rab3 GTPase-activating protein catalytic subunit OS=Homo sapiens GN=RAB3GAP1 PE=1 SV=3 - [RB3GP_HUMAN]	177.77	3.26	1	2	2	4	981	110.454	5.5542
Q9Y5Y2	Cytosolic Fe-S cluster assembly factor NUBP2 OS=Homo sapiens GN=NUBP2 PE=1 SV=1 - [NUBP2_HUMAN]	177.72	25.09	1	3	3	4	271	28.8068	5.8335
Q00577	Transcriptional activator protein Pur-alpha OS=Homo sapiens GN=PURA PE=1 SV=2 - [PURA_HUMAN]	177.57	7.14	1	1	1	1	322	34.8894	6.44287
Q7L1Q6	Basic leucine zipper and W2 domain-containing protein 1 OS=Homo sapiens GN=BZW1 PE=1 SV=1 - [BZW1_HUMAN]	177.56	12.89	1	3	4	5	419	48.0127	5.92236
Q15233	Non-POU domain-containing octamer-binding protein OS=Homo sapiens GN=NONO PE=1 SV=4 - [NONO_HUMAN]	177.18	4.88	1	1	1	3	471	54.1973	8.95361
Q96A33	Coiled-coil domain-containing protein 47 OS=Homo sapiens GN=CCDC47 PE=1 SV=1 - [CCD47_HUMAN]	176.1	8.7	1	2	3	4	483	55.8383	4.86865
Q8TCD5	5'(3')-deoxyribonucleotidase, cytosolic type OS=Homo sapiens GN=NT5C PE=1 SV=2 - [NT5C_HUMAN]	175.53	21.39	1	2	2	3	201	23.3681	6.63916
Q9NR45	Sialic acid synthase OS=Homo sapiens GN=NANS PE=1 SV=2 - [SIAS_HUMAN]	175.31	16.99	1	4	4	6	359	40.2815	6.7417
P62888	60S ribosomal protein L30 OS=Homo sapiens GN=RPL30 PE=1 SV=2 - [RL30_HUMAN]	174.8	40	1	3	3	3	115	12.7757	9.62744
O95394	Phosphoacetylglucosamine mutase OS=Homo sapiens GN=PGM3 PE=1 SV=1 - [AGM1_HUMAN]	174.56	12.36	1	3	3	3	542	59.8143	6.25244
P17813	Endoglin OS=Homo sapiens GN=ENG PE=1 SV=2 - [EGLN_HUMAN]	174.39	8.36	1	4	4	4	658	70.5331	6.60986
P99999	Cytochrome c OS=Homo sapiens GN=CYCS PE=1 SV=2 - [CYC_HUMAN]	174.39	26.67	1	2	2	3	105	11.7411	9.56885
O60547	GDP-mannose 4,6 dehydratase OS=Homo sapiens GN=GMDS PE=1 SV=1 - [GMDS_HUMAN]	174.28	10.75	1	3	3	4	372	41.9233	7.31299
Q09028	Histone-binding protein RBBP4 OS=Homo sapiens GN=RBBP4 PE=1 SV=3 - [RBBP4_HUMAN]	174.18	7.29	1	1	4	4	425	47.6261	4.89404
P63208	S-phase kinase-associated protein 1 OS=Homo sapiens GN=SKP1 PE=1 SV=2 - [SKP1_HUMAN]	173.44	20.25	1	3	3	4	163	18.6462	4.53857
O95716	Ras-related protein Rab-3D OS=Homo sapiens GN=RAB3D PE=1 SV=1 - [RAB3D_HUMAN]	173.43	23.74	10	2	4	4	219	24.2518	4.93213
O75396	Vesicle-trafficking protein SEC22b OS=Homo sapiens GN=SEC22B PE=1 SV=4 - [SC22B_HUMAN]	173.29	26.98	1	4	4	4	215	24.5775	6.91748
Q9UNF0	Protein kinase C and casein kinase substrate in neurons protein 2 OS=Homo sapiens GN=PACSIN2 PE=1 SV=2 - [PACN2_HUMAN]	172.64	8.85	1	4	4	5	486	55.7039	5.19873
P38919	Eukaryotic initiation factor 4A-III OS=Homo sapiens GN=EIF4A3 PE=1 SV=4 - [IF4A3_HUMAN]	172.6	13.87	1	2	3	6	411	46.8412	6.72705
Q9UG63	ATP-binding cassette sub-family F member 2 OS=Homo sapiens GN=ABCF2 PE=1 SV=2 - [ABCF2_HUMAN]	172.58	6.42	1	3	3	3	623	71.2446	7.37158
P54753	Ephrin type-B receptor 3 OS=Homo sapiens GN=EPHB3 PE=1 SV=2 - [EPHB3_HUMAN]	172.39	6.01	4	1	4	4	998	110.259	6.31592
P49915	GMP synthase [glutamine-hydrolyzing] OS=Homo sapiens GN=GMPS PE=1 SV=1 - [GUAA_HUMAN]	171.74	13.28	1	4	4	5	693	76.667	6.87354
P56377	AP-1 complex subunit sigma-2 OS=Homo sapiens GN=AP1S2 PE=1 SV=1 - [AP1S2_HUMAN]	171.36	15.92	1	2	2	2	157	18.6028	5.46533
O60568	Procollagen-lysine,2-oxoglutarate 5-dioxygenase 3 OS=Homo sapiens GN=PLOD3 PE=1 SV=1 - [PLOD3_HUMAN]	170.76	8.54	1	4	4	4	738	84.7315	6.04932
Q9H2K8	Serine/threonine-protein kinase TAO3 OS=Homo sapiens GN=TAOK3 PE=1 SV=2 - [TAOK3_HUMAN]	170.29	6.01	1	3	4	5	898	105.34	7.29834
P46821	Microtubule-associated protein 1B OS=Homo sapiens GN=MAP1B PE=1 SV=2 - [MAP1B_HUMAN]	169.46	2.67	2	3	3	3	2468	270.468	4.80518
P13804	Electron transfer flavoprotein subunit alpha, mitochondrial OS=Homo sapiens GN=ETFA PE=1 SV=1 - [ETFA_HUMAN]	169.34	18.92	1	3	4	4	333	35.0576	8.38232
Q9Y6B6	GTP-binding protein SAR1b OS=Homo sapiens GN=SAR1B PE=1 SV=1 - [SAR1B_HUMAN]	169.34	25.76	1	2	3	3	198	22.3955	6.11279
O00203	AP-3 complex subunit beta-1 OS=Homo sapiens GN=AP3B1 PE=1 SV=3 - [AP3B1_HUMAN]	169.01	6.49	1	6	6	6	1094	121.245	6.03662
Q9UBQ7	Glyoxylate reductase/hydroxypyruvate reductase OS=Homo sapiens GN=GRHPR PE=1 SV=1 - [GRHPR_HUMAN]	168.75	21.95	1	4	4	5	328	35.6457	7.38623
Q7Z3E5	LisH domain-containing protein ARMC9 OS=Homo sapiens OX=9606 GN=ARMC9 PE=1 SV=3 - [ARMC9_HUMAN]	168.46	5.01	1	2	2	2	818	91.761	6.20166
Q9UBQ0	Vacuolar protein sorting-associated protein 29 OS=Homo sapiens GN=VPS29 PE=1 SV=1 - [VPS29_HUMAN]	168.04	26.92	1	3	3	4	182	20.4927	6.78564
P13796	Plastin-2 OS=Homo sapiens GN=LCP1 PE=1 SV=6 - [PLSL_HUMAN]	167.56	10.85	1	1	5	5	627	70.2439	5.42725
P62280	40S ribosomal protein S11 OS=Homo sapiens GN=RPS11 PE=1 SV=3 - [RS11_HUMAN]	167.45	24.68	1	3	3	4	158	18.419	10.3013
Q9UL25	Ras-related protein Rab-21 OS=Homo sapiens GN=RAB21 PE=1 SV=3 - [RAB21_HUMAN]	167.38	15.11	1	3	3	3	225	24.3323	7.94287
P07954	Fumarate hydratase, mitochondrial OS=Homo sapiens GN=FH PE=1 SV=3 - [FUMH_HUMAN]	166.32	9.41	1	3	3	3	510	54.6022	8.76318
Q9Y6D5	Brefeldin A-inhibited guanine nucleotide-exchange protein 2 OS=Homo sapiens GN=ARFGEF2 PE=1 SV=3 - [BIG2_HUMAN]	166.25	2.63	2	3	3	3	1785	201.909	6.32861
Q7L2E3	Putative ATP-dependent RNA helicase DHX30 OS=Homo sapiens GN=DHX30 PE=1 SV=1 - [DHX30_HUMAN]	166.06	2.51	1	2	2	3	1194	133.855	8.77783
Q6ZVM7	TOM1-like protein 2 OS=Homo sapiens GN=TOM1L2 PE=1 SV=1 - [TM1L2_HUMAN]	165.88	8.88	1	3	3	3	507	55.5217	4.79248
Q9UHY1	Nuclear receptor-binding protein OS=Homo sapiens GN=NRBP1 PE=1 SV=1 - [NRBP_HUMAN]	165.67	7.85	1	3	3	5	535	59.8071	5.08447
Q13616	Cullin-1 OS=Homo sapiens GN=CUL1 PE=1 SV=2 - [CUL1_HUMAN]	165.03	3.99	1	2	2	3	776	89.622	8.00146
P51114	Fragile X mental retardation syndrome-related protein 1 OS=Homo sapiens GN=FXR1 PE=1 SV=3 - [FXR1_HUMAN]	165.03	9.34	1	4	4	4	621	69.6779	6.15088
Q9NUP9	Protein lin-7 homolog C OS=Homo sapiens GN=LIN7C PE=1 SV=1 - [LIN7C_HUMAN]	164.99	10.15	2	1	1	3	197	21.8205	8.42627
Q96KN1	Protein FAM84B OS=Homo sapiens GN=FAM84B PE=1 SV=1 - [FA84B_HUMAN]	164.83	20.65	1	3	3	4	310	34.4531	5.5415
P00492	Hypoxanthine-guanine phosphoribosyltransferase OS=Homo sapiens GN=HPRT1 PE=1 SV=2 - [HPRT_HUMAN]	164.6	24.77	1	3	3	3	218	24.5636	6.68311
Q9NVD7	Alpha-parvin OS=Homo sapiens GN=PARVA PE=1 SV=1 - [PARVA_HUMAN]	164.31	7.53	1	2	2	2	372	42.2174	5.94775
P18433	Receptor-type tyrosine-protein phosphatase alpha OS=Homo sapiens OX=9606 GN=PTPRA PE=1 SV=3 - [PTPRA_HUMAN]	163.81	5.49	1	3	3	3	802	90.6615	6.65381
Q6L8Q7	2',5'-phosphodiesterase 12 OS=Homo sapiens GN=PDE12 PE=1 SV=2 - [PDE12_HUMAN]	163.64	7.39	1	3	3	4	609	67.3089	6.56592
O95372	Acyl-protein thioesterase 2 OS=Homo sapiens GN=LYPLA2 PE=1 SV=1 - [LYPA2_HUMAN]	163.52	37.23	1	4	4	6	231	24.7207	7.2251
Q9UIA9	Exportin-7 OS=Homo sapiens GN=XPO7 PE=1 SV=3 - [XPO7_HUMAN]	163.35	2.67	1	2	2	2	1087	123.828	6.31592
P52306	Rap1 GTPase-GDP dissociation stimulator 1 OS=Homo sapiens GN=RAP1GDS1 PE=1 SV=3 - [GDS1_HUMAN]	163.27	9.88	1	4	4	4	607	66.2745	5.31299
Q9UL15	BAG family molecular chaperone regulator 5 OS=Homo sapiens GN=BAG5 PE=1 SV=1 - [BAG5_HUMAN]	163.27	7.16	1	2	2	3	447	51.1677	6.04932
Q92783	Signal transducing adapter molecule 1 OS=Homo sapiens GN=STAM PE=1 SV=3 - [STAM1_HUMAN]	163.07	7.78	1	3	3	3	540	59.142	4.81787
Q96G03	Phosphoglucomutase-2 OS=Homo sapiens GN=PGM2 PE=1 SV=4 - [PGM2_HUMAN]	163.06	8.99	1	4	4	5	612	68.2404	6.72705
Q8IZP0	Abl interactor 1 OS=Homo sapiens GN=ABI1 PE=1 SV=4 - [ABI1_HUMAN]	163.04	12.6	2	4	4	4	508	55.0467	7.06396
P01906	HLA class II histocompatibility antigen, DQ alpha 2 chain OS=Homo sapiens GN=HLA-DQA2 PE=1 SV=2 - [DQA2_HUMAN]	162.98	11.37	1	1	2	4	255	28.015	4.88135
Q99698	Lysosomal-trafficking regulator OS=Homo sapiens GN=LYST PE=1 SV=3 - [LYST_HUMAN]	162.63	2	1	5	5	5	3801	428.866	6.60986
Q53HC9	Protein TSSC1 OS=Homo sapiens GN=TSSC1 PE=1 SV=2 - [TSSC1_HUMAN]	162.35	4.91	1	1	1	2	387	43.5761	5.05908
Q9Y371	Endophilin-B1 OS=Homo sapiens GN=SH3GLB1 PE=1 SV=1 - [SHLB1_HUMAN]	162.16	15.07	1	4	4	4	365	40.7708	6.03662
Q27J81	Inverted formin-2 OS=Homo sapiens GN=INF2 PE=1 SV=2 - [INF2_HUMAN]	162.11	4.32	1	3	3	3	1249	135.54	5.37646
P11169	Solute carrier family 2, facilitated glucose transporter member 3 OS=Homo sapiens GN=SLC2A3 PE=1 SV=1 - [GTR3_HUMAN]	161.84	10.89	2	4	5	5	496	53.8893	7.1958
Q9BZG1	Ras-related protein Rab-34 OS=Homo sapiens GN=RAB34 PE=1 SV=1 - [RAB34_HUMAN]	161.29	21.62	1	4	4	4	259	29.0259	7.88428
O14672	Disintegrin and metalloproteinase domain-containing protein 10 OS=Homo sapiens GN=ADAM10 PE=1 SV=1 - [ADA10_HUMAN]	161.2	6.55	1	3	3	5	748	84.0877	7.76709
P78539	Sushi repeat-containing protein SRPX OS=Homo sapiens GN=SRPX PE=2 SV=1 - [SRPX_HUMAN]	160.79	9.91	1	3	3	3	464	51.5381	8.66064
Q9GZS3	WD repeat-containing protein 61 OS=Homo sapiens GN=WDR61 PE=1 SV=1 - [WDR61_HUMAN]	160.64	20.33	1	3	3	5	305	33.5598	5.46533
O95861	3'(2'),5'-bisphosphate nucleotidase 1 OS=Homo sapiens GN=BPNT1 PE=1 SV=1 - [BPNT1_HUMAN]	159.05	12.66	1	3	3	3	308	33.3712	5.69385
P26599	Polypyrimidine tract-binding protein 1 OS=Homo sapiens GN=PTBP1 PE=1 SV=1 - [PTBP1_HUMAN]	158.82	13.56	1	4	4	4	531	57.1856	9.17334
P41217	OX-2 membrane glycoprotein OS=Homo sapiens GN=CD200 PE=1 SV=4 - [OX2G_HUMAN]	158.56	19.78	1	3	3	3	278	31.2442	8.51416
O15240	Neurosecretory protein VGF OS=Homo sapiens GN=VGF PE=1 SV=2 - [VGF_HUMAN]	158.52	3.09	1	1	1	2	615	67.2176	4.77979
P45880	Voltage-dependent anion-selective channel protein 2 OS=Homo sapiens GN=VDAC2 PE=1 SV=2 - [VDAC2_HUMAN]	158.47	20.75	1	5	5	5	294	31.5465	7.56201
O43447	Peptidyl-prolyl cis-trans isomerase H OS=Homo sapiens GN=PPIH PE=1 SV=1 - [PPIH_HUMAN]	158.3	23.16	2	2	3	5	177	19.1956	8.07471
P24752	Acetyl-CoA acetyltransferase, mitochondrial OS=Homo sapiens GN=ACAT1 PE=1 SV=1 - [THIL_HUMAN]	158.09	13.11	1	2	2	3	427	45.1706	8.85107
Q9Y295	Developmentally-regulated GTP-binding protein 1 OS=Homo sapiens GN=DRG1 PE=1 SV=1 - [DRG1_HUMAN]	157.75	11.99	1	2	2	3	367	40.5168	8.89502
Q12768	WASH complex subunit strumpellin OS=Homo sapiens GN=KIAA0196 PE=1 SV=1 - [STRUM_HUMAN]	157.53	4.57	1	3	3	3	1159	134.201	6.97607
Q7Z3U7	Protein MON2 homolog OS=Homo sapiens GN=MON2 PE=1 SV=3 - [MON2_HUMAN]	157.43	4.25	1	4	4	4	1717	190.237	6.06201
Q15126	Phosphomevalonate kinase OS=Homo sapiens GN=PMVK PE=1 SV=3 - [PMVK_HUMAN]	157.25	13.54	1	2	2	2	192	21.9812	5.73193
P28072	Proteasome subunit beta type-6 OS=Homo sapiens GN=PSMB6 PE=1 SV=4 - [PSB6_HUMAN]	156.55	27.62	1	3	3	3	239	25.3414	4.91943
Q00796	Sorbitol dehydrogenase OS=Homo sapiens GN=SORD PE=1 SV=4 - [DHSO_HUMAN]	156.37	14.85	1	3	3	3	357	38.2998	7.97217
O60678	Protein arginine N-methyltransferase 3 OS=Homo sapiens OX=9606 GN=PRMT3 PE=1 SV=4 - [ANM3_HUMAN]	156.36	6.03	1	2	2	3	531	59.8648	5.35107
Q7RTP6	Protein-methionine sulfoxide oxidase MICAL3 OS=Homo sapiens GN=MICAL3 PE=1 SV=2 - [MICA3_HUMAN]	156.16	2.5	1	3	3	4	2002	224.156	5.5542
Q9BVQ7	Spermatogenesis-associated protein 5-like protein 1 OS=Homo sapiens GN=SPATA5L1 PE=1 SV=2 - [SPA5L_HUMAN]	155.67	2.52	1	1	1	2	753	80.6599	8.08936
P23229	Integrin alpha-6 OS=Homo sapiens GN=ITGA6 PE=1 SV=5 - [ITA6_HUMAN]	155.47	4.42	1	4	4	4	1130	126.526	6.60986
P63151	Serine/threonine-protein phosphatase 2A 55 kDa regulatory subunit B alpha isoform OS=Homo sapiens GN=PPP2R2A PE=1 SV=1 - [2ABA_HUMAN]	155.47	13.65	3	4	4	4	447	51.6595	6.20166
P25786	Proteasome subunit alpha type-1 OS=Homo sapiens GN=PSMA1 PE=1 SV=1 - [PSA1_HUMAN]	155.29	26.62	1	5	5	6	263	29.5369	6.60986
Q6P2Q9	Pre-mRNA-processing-splicing factor 8 OS=Homo sapiens GN=PRPF8 PE=1 SV=2 - [PRP8_HUMAN]	155.06	3.21	1	4	4	4	2335	273.427	8.83643
O94826	Mitochondrial import receptor subunit TOM70 OS=Homo sapiens GN=TOMM70A PE=1 SV=1 - [TOM70_HUMAN]	155.01	6.91	1	2	2	3	608	67.412	7.12256
Q9UH65	Switch-associated protein 70 OS=Homo sapiens GN=SWAP70 PE=1 SV=1 - [SWP70_HUMAN]	154.76	5.47	1	2	2	3	585	68.9545	5.87158
P55058	Phospholipid transfer protein OS=Homo sapiens GN=PLTP PE=1 SV=1 - [PLTP_HUMAN]	154.69	16.63	1	4	4	4	493	54.7045	7.00537
Q9BY67	Cell adhesion molecule 1 OS=Homo sapiens GN=CADM1 PE=1 SV=2 - [CADM1_HUMAN]	154.19	13.12	1	3	3	3	442	48.4784	5.07178
P05141	ADP/ATP translocase 2 OS=Homo sapiens GN=SLC25A5 PE=1 SV=7 - [ADT2_HUMAN]	153.99	11.41	2	1	3	4	298	32.8312	9.68604
Q14258	E3 ubiquitin/ISG15 ligase TRIM25 OS=Homo sapiens GN=TRIM25 PE=1 SV=2 - [TRI25_HUMAN]	153.99	2.86	1	1	1	2	630	70.9277	8.08936
Q13148	TAR DNA-binding protein 43 OS=Homo sapiens GN=TARDBP PE=1 SV=1 - [TADBP_HUMAN]	153.91	7.25	1	2	2	2	414	44.7113	6.18896
P04792	Heat shock protein beta-1 OS=Homo sapiens GN=HSPB1 PE=1 SV=2 - [HSPB1_HUMAN]	153.84	20.98	1	3	3	3	205	22.7685	6.40479
P42025	Beta-centractin OS=Homo sapiens GN=ACTR1B PE=1 SV=1 - [ACTY_HUMAN]	153.71	28.19	1	2	5	6	376	42.2667	6.40479
P13987	CD59 glycoprotein OS=Homo sapiens GN=CD59 PE=1 SV=1 - [CD59_HUMAN]	153.69	25	1	3	3	5	128	14.1678	6.48096
Q13561	Dynactin subunit 2 OS=Homo sapiens GN=DCTN2 PE=1 SV=4 - [DCTN2_HUMAN]	153.67	11.72	1	3	3	3	401	44.2039	5.21143
Q8TD19	Serine/threonine-protein kinase Nek9 OS=Homo sapiens GN=NEK9 PE=1 SV=2 - [NEK9_HUMAN]	153.64	4.19	1	3	3	3	979	107.1	5.74463
P13473	Lysosome-associated membrane glycoprotein 2 OS=Homo sapiens GN=LAMP2 PE=1 SV=2 - [LAMP2_HUMAN]	153.43	8.78	1	4	4	4	410	44.9323	5.63037
Q9P260	LisH domain and HEAT repeat-containing protein KIAA1468 OS=Homo sapiens GN=KIAA1468 PE=1 SV=2 - [K1468_HUMAN]	153.4	4.77	1	4	4	4	1216	134.545	5.45264
Q9Y3A5	Ribosome maturation protein SBDS OS=Homo sapiens GN=SBDS PE=1 SV=4 - [SBDS_HUMAN]	153.01	14	1	3	3	3	250	28.7453	8.74854
Q8IXU6	Solute carrier family 35 member F2 OS=Homo sapiens GN=SLC35F2 PE=1 SV=1 - [S35F2_HUMAN]	152.88	7.49	1	1	1	2	374	41.1848	6.21436
P36543	V-type proton ATPase subunit E 1 OS=Homo sapiens GN=ATP6V1E1 PE=1 SV=1 - [VATE1_HUMAN]	152.86	10.62	1	2	2	3	226	26.1288	8.00146
O60443	Non-syndromic hearing impairment protein 5 OS=Homo sapiens GN=DFNA5 PE=1 SV=2 - [DFNA5_HUMAN]	152.69	8.67	1	4	4	4	496	54.5204	5.17334
O94804	Serine/threonine-protein kinase 10 OS=Homo sapiens GN=STK10 PE=1 SV=1 - [STK10_HUMAN]	152.65	7.85	1	6	6	6	968	112.065	6.94678
Q01650	Large neutral amino acids transporter small subunit 1 OS=Homo sapiens GN=SLC7A5 PE=1 SV=2 - [LAT1_HUMAN]	152.19	7.3	3	3	3	4	507	54.9743	7.72314
Q9NZD8	Maspardin OS=Homo sapiens GN=SPG21 PE=1 SV=1 - [SPG21_HUMAN]	152.18	6.49	1	1	1	2	308	34.9376	6.27783
O75886	Signal transducing adapter molecule 2 OS=Homo sapiens GN=STAM2 PE=1 SV=1 - [STAM2_HUMAN]	151.89	9.71	1	3	3	3	525	58.1277	5.07178
P37837	Transaldolase OS=Homo sapiens GN=TALDO1 PE=1 SV=2 - [TALDO_HUMAN]	151.68	13.35	1	4	4	4	337	37.5165	6.81494
O94979	Protein transport protein Sec31A OS=Homo sapiens GN=SEC31A PE=1 SV=3 - [SC31A_HUMAN]	151.56	4.59	1	3	3	6	1220	132.931	6.88818
Q14956	Transmembrane glycoprotein NMB OS=Homo sapiens GN=GPNMB PE=1 SV=2 - [GPNMB_HUMAN]	150.31	3.15	1	1	1	3	572	63.8819	6.63916
O75153	Protein KIAA0664 OS=Homo sapiens GN=KIAA0664 PE=1 SV=2 - [K0664_HUMAN]	150.02	6.26	1	3	4	4	1309	146.577	6.12549
P51153	Ras-related protein Rab-13 OS=Homo sapiens GN=RAB13 PE=1 SV=1 - [RAB13_HUMAN]	149.89	17.24	1	2	3	3	203	22.7597	9.18799
Q99471	Prefoldin subunit 5 OS=Homo sapiens GN=PFDN5 PE=1 SV=2 - [PFD5_HUMAN]	149.75	31.17	1	3	3	3	154	17.317	6.32861
Q9Y243	RAC-gamma serine/threonine-protein kinase OS=Homo sapiens GN=AKT3 PE=1 SV=1 - [AKT3_HUMAN]	149.15	9.6	1	3	3	3	479	55.7388	6.02393
P52294	Importin subunit alpha-1 OS=Homo sapiens GN=KPNA1 PE=1 SV=3 - [IMA1_HUMAN]	148.9	12.64	1	2	4	4	538	60.1836	5.0083
P30043	Flavin reductase (NADPH) OS=Homo sapiens GN=BLVRB PE=1 SV=3 - [BLVRB_HUMAN]	148.87	14.08	1	2	2	2	206	22.1054	7.6499
O75947	ATP synthase subunit d, mitochondrial OS=Homo sapiens GN=ATP5H PE=1 SV=3 - [ATP5H_HUMAN]	148.76	21.74	1	2	2	3	161	18.4795	5.30029
P29317	Ephrin type-A receptor 2 OS=Homo sapiens GN=EPHA2 PE=1 SV=2 - [EPHA2_HUMAN]	148.73	4.51	4	3	4	4	976	108.197	6.22705
P36959	GMP reductase 1 OS=Homo sapiens GN=GMPR PE=1 SV=1 - [GMPR1_HUMAN]	148.15	4.35	1	1	1	2	345	37.3948	7.06396
Q96AX1	Vacuolar protein sorting-associated protein 33A OS=Homo sapiens GN=VPS33A PE=1 SV=1 - [VP33A_HUMAN]	148.14	7.89	1	3	3	3	596	67.5682	6.96143
P62314	Small nuclear ribonucleoprotein Sm D1 OS=Homo sapiens GN=SNRPD1 PE=1 SV=1 - [SMD1_HUMAN]	148.11	36.97	1	3	3	4	119	13.2734	11.561
Q02543	60S ribosomal protein L18a OS=Homo sapiens GN=RPL18A PE=1 SV=2 - [RL18A_HUMAN]	148.1	28.41	1	5	5	5	176	20.7489	10.7114
Q68D91	Metallo-beta-lactamase domain-containing protein 2 OS=Homo sapiens GN=MBLAC2 PE=1 SV=3 - [MBLC2_HUMAN]	147.86	10.04	1	2	2	2	279	31.352	6.91748
Q14738	Serine/threonine-protein phosphatase 2A 56 kDa regulatory subunit delta isoform OS=Homo sapiens GN=PPP2R5D PE=1 SV=1 - [2A5D_HUMAN]	147.5	10.47	1	4	4	5	602	69.9474	8.1333
Q13557	Calcium/calmodulin-dependent protein kinase type II subunit delta OS=Homo sapiens GN=CAMK2D PE=1 SV=3 - [KCC2D_HUMAN]	147.45	10.02	4	3	3	3	499	56.3336	7.25439
P62829	60S ribosomal protein L23 OS=Homo sapiens GN=RPL23 PE=1 SV=1 - [RL23_HUMAN]	147.44	25	1	2	2	2	140	14.8561	10.5063
P49354	Protein farnesyltransferase/geranylgeranyltransferase type-1 subunit alpha OS=Homo sapiens GN=FNTA PE=1 SV=1 - [FNTA_HUMAN]	147.43	6.6	1	2	2	3	379	44.3811	5.08447
P52735	Guanine nucleotide exchange factor VAV2 OS=Homo sapiens GN=VAV2 PE=1 SV=2 - [VAV2_HUMAN]	147.31	6.95	1	4	4	4	878	101.224	7.07861
Q13637	Ras-related protein Rab-32 OS=Homo sapiens GN=RAB32 PE=1 SV=3 - [RAB32_HUMAN]	147.1	20.44	1	3	4	5	225	24.9817	6.53662
P00568	Adenylate kinase isoenzyme 1 OS=Homo sapiens GN=AK1 PE=1 SV=3 - [KAD1_HUMAN]	146.47	21.65	1	3	3	3	194	21.6213	8.63135
O43592	Exportin-T OS=Homo sapiens GN=XPOT PE=1 SV=2 - [XPOT_HUMAN]	146.3	4.57	1	3	3	3	962	109.893	5.38916
O00471	Exocyst complex component 5 OS=Homo sapiens GN=EXOC5 PE=1 SV=1 - [EXOC5_HUMAN]	145.15	8.33	1	3	3	3	708	81.8008	6.7124
O60884	DnaJ homolog subfamily A member 2 OS=Homo sapiens GN=DNAJA2 PE=1 SV=1 - [DNJA2_HUMAN]	145.07	13.11	1	3	3	4	412	45.7166	6.48096
P62851	40S ribosomal protein S25 OS=Homo sapiens GN=RPS25 PE=1 SV=1 - [RS25_HUMAN]	144.98	22.4	1	3	3	3	125	13.7337	10.1108
Q01433	AMP deaminase 2 OS=Homo sapiens GN=AMPD2 PE=1 SV=2 - [AMPD2_HUMAN]	144.73	4.89	1	4	4	4	879	100.624	6.93213
P55263	Adenosine kinase OS=Homo sapiens GN=ADK PE=1 SV=2 - [ADK_HUMAN]	144.5	14.36	1	3	3	3	362	40.5197	6.69775
P48163	NADP-dependent malic enzyme OS=Homo sapiens GN=ME1 PE=1 SV=1 - [MAOX_HUMAN]	144.47	3.15	1	1	1	2	572	64.1091	6.12549
Q9UEY8	Gamma-adducin OS=Homo sapiens GN=ADD3 PE=1 SV=1 - [ADDG_HUMAN]	144.23	6.94	1	3	3	3	706	79.1052	6.31592
O95302	Peptidyl-prolyl cis-trans isomerase FKBP9 OS=Homo sapiens GN=FKBP9 PE=1 SV=2 - [FKBP9_HUMAN]	144.14	5.79	2	2	2	2	570	63.0435	5.08447
O15498	Synaptobrevin homolog YKT6 OS=Homo sapiens GN=YKT6 PE=1 SV=1 - [YKT6_HUMAN]	143.98	26.26	1	4	4	5	198	22.4034	6.91748
O95573	Long-chain-fatty-acid--CoA ligase 3 OS=Homo sapiens GN=ACSL3 PE=1 SV=3 - [ACSL3_HUMAN]	142.61	11.39	1	3	5	5	720	80.3683	8.38232
Q15631	Translin OS=Homo sapiens GN=TSN PE=1 SV=1 - [TSN_HUMAN]	142.28	17.98	1	3	3	4	228	26.1668	6.44287
Q93096	Protein tyrosine phosphatase type IVA 1 OS=Homo sapiens GN=PTP4A1 PE=1 SV=2 - [TP4A1_HUMAN]	142.17	38.73	1	2	4	4	173	19.8022	8.96826
Q13126	S-methyl-5'-thioadenosine phosphorylase OS=Homo sapiens GN=MTAP PE=1 SV=2 - [MTAP_HUMAN]	142.17	20.49	1	3	3	3	283	31.2158	7.18115
O43847	Nardilysin OS=Homo sapiens OX=9606 GN=NRDC PE=1 SV=3 - [NRDC_HUMAN]	142.16	2.69	1	2	2	2	1151	131.618	4.98291
P78527	DNA-dependent protein kinase catalytic subunit OS=Homo sapiens GN=PRKDC PE=1 SV=3 - [PRKDC_HUMAN]	141.45	1.07	1	3	4	4	4128	468.788	7.12256
Q9UHB9	Signal recognition particle 68 kDa protein OS=Homo sapiens GN=SRP68 PE=1 SV=2 - [SRP68_HUMAN]	141.4	2.55	1	1	1	1	627	70.6856	8.55811
P55010	Eukaryotic translation initiation factor 5 OS=Homo sapiens GN=EIF5 PE=1 SV=2 - [IF5_HUMAN]	140.97	7.19	1	3	3	3	431	49.1918	5.57959
Q07812	Apoptosis regulator BAX OS=Homo sapiens GN=BAX PE=1 SV=1 - [BAX_HUMAN]	140.92	13.54	1	2	2	2	192	21.1708	5.22412
P16989	DNA-binding protein A OS=Homo sapiens GN=CSDA PE=1 SV=4 - [DBPA_HUMAN]	140.87	19.09	1	2	2	2	372	40.066	9.77393
O95831	Apoptosis-inducing factor 1, mitochondrial OS=Homo sapiens GN=AIFM1 PE=1 SV=1 - [AIFM1_HUMAN]	140.64	7.34	1	3	3	3	613	66.8589	8.95361
P48047	ATP synthase subunit O, mitochondrial OS=Homo sapiens GN=ATP5O PE=1 SV=1 - [ATPO_HUMAN]	140.03	14.55	1	2	2	2	213	23.2627	9.96436
P25788	Proteasome subunit alpha type-3 OS=Homo sapiens GN=PSMA3 PE=1 SV=2 - [PSA3_HUMAN]	139.73	12.94	1	3	3	4	255	28.4151	5.32568
Q92530	Proteasome inhibitor PI31 subunit OS=Homo sapiens GN=PSMF1 PE=1 SV=2 - [PSMF1_HUMAN]	139.48	6.27	1	1	1	2	271	29.798	5.74463
Q9BUL8	Programmed cell death protein 10 OS=Homo sapiens GN=PDCD10 PE=1 SV=1 - [PDC10_HUMAN]	139.41	17.92	1	2	2	3	212	24.6858	8.19189
Q15181	Inorganic pyrophosphatase OS=Homo sapiens GN=PPA1 PE=1 SV=2 - [IPYR_HUMAN]	139.04	17.3	1	3	3	3	289	32.6392	5.85889
O15145	Actin-related protein 2/3 complex subunit 3 OS=Homo sapiens GN=ARPC3 PE=1 SV=3 - [ARPC3_HUMAN]	137.94	19.66	1	3	3	3	178	20.5334	8.5874
P21399	Cytoplasmic aconitate hydratase OS=Homo sapiens GN=ACO1 PE=1 SV=3 - [ACOC_HUMAN]	137.9	6.19	1	3	3	3	889	98.3366	6.68311
P21926	CD9 antigen OS=Homo sapiens GN=CD9 PE=1 SV=4 - [CD9_HUMAN]	137.54	15.35	1	2	2	2	228	25.399	7.15186
P08069	Insulin-like growth factor 1 receptor OS=Homo sapiens GN=IGF1R PE=1 SV=1 - [IGF1R_HUMAN]	137.48	3.29	1	3	3	3	1367	154.693	5.79541
P38117	Electron transfer flavoprotein subunit beta OS=Homo sapiens GN=ETFB PE=1 SV=3 - [ETFB_HUMAN]	137.36	14.12	1	3	3	3	255	27.8262	8.104
P62942	Peptidyl-prolyl cis-trans isomerase FKBP1A OS=Homo sapiens GN=FKBP1A PE=1 SV=2 - [FKB1A_HUMAN]	137.31	15.74	1	1	1	3	108	11.9431	8.1626
P31749	RAC-alpha serine/threonine-protein kinase OS=Homo sapiens GN=AKT1 PE=1 SV=2 - [AKT1_HUMAN]	137.11	9.58	1	2	3	3	480	55.6508	6.07471
Q8N392	Rho GTPase-activating protein 18 OS=Homo sapiens GN=ARHGAP18 PE=1 SV=3 - [RHG18_HUMAN]	136.68	2.71	1	1	1	2	663	74.9299	6.44287
P46781	40S ribosomal protein S9 OS=Homo sapiens GN=RPS9 PE=1 SV=3 - [RS9_HUMAN]	136.42	18.56	1	4	4	4	194	22.5776	10.6528
Q9UL26	Ras-related protein Rab-22A OS=Homo sapiens GN=RAB22A PE=1 SV=2 - [RB22A_HUMAN]	136.09	17.53	1	2	2	2	194	21.8412	8.14795
O60814	Histone H2B type 1-K OS=Homo sapiens GN=HIST1H2BK PE=1 SV=3 - [H2B1K_HUMAN]	136	19.05	15	2	2	2	126	13.8816	10.3159
Q05682	Caldesmon OS=Homo sapiens GN=CALD1 PE=1 SV=3 - [CALD1_HUMAN]	135.58	4.04	1	2	2	4	793	93.1754	5.65576
Q13418	Integrin-linked protein kinase OS=Homo sapiens GN=ILK PE=1 SV=2 - [ILK_HUMAN]	135.41	9.73	1	3	3	3	452	51.3859	8.07471
P49321	Nuclear autoantigenic sperm protein OS=Homo sapiens GN=NASP PE=1 SV=2 - [NASP_HUMAN]	134.93	5.96	1	2	2	2	788	85.1861	4.29736
Q8N7R7	Cyclin-Y-like protein 1 OS=Homo sapiens GN=CCNYL1 PE=1 SV=2 - [CCYL1_HUMAN]	134.85	4.74	1	1	1	1	359	40.6794	6.07471
P02768	Serum albumin OS=Homo sapiens GN=ALB PE=1 SV=2 - [ALBU_HUMAN]	134.78	2.46	1	2	2	3	609	69.3215	6.27783
Q9UBW8	COP9 signalosome complex subunit 7a OS=Homo sapiens GN=COPS7A PE=1 SV=1 - [CSN7A_HUMAN]	134.74	5.82	1	1	1	2	275	30.258	8.22119
Q15417	Calponin-3 OS=Homo sapiens GN=CNN3 PE=1 SV=1 - [CNN3_HUMAN]	134.73	13.68	1	3	3	3	329	36.3908	6.04932
Q8TAF3	WD repeat-containing protein 48 OS=Homo sapiens GN=WDR48 PE=1 SV=1 - [WDR48_HUMAN]	134.72	5.47	1	2	2	3	677	76.1624	7.03467
Q7Z2W4	Zinc finger CCCH-type antiviral protein 1 OS=Homo sapiens GN=ZC3HAV1 PE=1 SV=3 - [ZCCHV_HUMAN]	134.18	3.66	1	2	2	4	902	101.367	8.39697
P50914	60S ribosomal protein L14 OS=Homo sapiens GN=RPL14 PE=1 SV=4 - [RL14_HUMAN]	134.12	10.23	1	2	2	2	215	23.417	10.9312
Q9Y6N7	Roundabout homolog 1 OS=Homo sapiens GN=ROBO1 PE=1 SV=1 - [ROBO1_HUMAN]	134.04	1.82	1	1	1	2	1651	180.818	6.03662
Q9Y5K5	Ubiquitin carboxyl-terminal hydrolase isozyme L5 OS=Homo sapiens GN=UCHL5 PE=1 SV=3 - [UCHL5_HUMAN]	134.03	16.41	1	3	3	4	329	37.583	5.32568
Q9H488	GDP-fucose protein O-fucosyltransferase 1 OS=Homo sapiens GN=POFUT1 PE=1 SV=1 - [OFUT1_HUMAN]	133.82	6.7	1	2	2	2	388	43.9272	8.52881
P38571	Lysosomal acid lipase/cholesteryl ester hydrolase OS=Homo sapiens GN=LIPA PE=1 SV=2 - [LICH_HUMAN]	133.67	13.03	1	3	3	4	399	45.3897	6.91748
P07910	Heterogeneous nuclear ribonucleoproteins C1/C2 OS=Homo sapiens GN=HNRNPC PE=1 SV=4 - [HNRPC_HUMAN]	133.57	9.15	4	2	2	2	306	33.6495	5.08447
Q8NFZ8	Cell adhesion molecule 4 OS=Homo sapiens GN=CADM4 PE=1 SV=1 - [CADM4_HUMAN]	133.1	4.64	1	1	1	2	388	42.7588	6.30322
Q2M389	WASH complex subunit 7 OS=Homo sapiens GN=KIAA1033 PE=1 SV=2 - [WASH7_HUMAN]	132.86	2.9	1	3	3	4	1173	136.316	7.44482
Q86V88	Magnesium-dependent phosphatase 1 OS=Homo sapiens GN=MDP1 PE=1 SV=1 - [MGDP1_HUMAN]	132.81	10.23	1	1	1	1	176	20.0963	6.39209
P60201	Myelin proteolipid protein OS=Homo sapiens GN=PLP1 PE=1 SV=2 - [MYPR_HUMAN]	132.77	8.66	1	2	2	3	277	30.0571	8.35303
P17612	cAMP-dependent protein kinase catalytic subunit alpha OS=Homo sapiens GN=PRKACA PE=1 SV=2 - [KAPCA_HUMAN]	132.6	21.08	3	4	4	4	351	40.564	8.79248
P06865	Beta-hexosaminidase subunit alpha OS=Homo sapiens GN=HEXA PE=1 SV=2 - [HEXA_HUMAN]	132.53	5.1	1	2	2	3	529	60.6643	5.16064
Q9HAV4	Exportin-5 OS=Homo sapiens GN=XPO5 PE=1 SV=1 - [XPO5_HUMAN]	132.4	2.57	1	2	2	2	1204	136.222	5.79541
P19174	1-phosphatidylinositol-4,5-bisphosphate phosphodiesterase gamma-1 OS=Homo sapiens GN=PLCG1 PE=1 SV=1 - [PLCG1_HUMAN]	132.14	4.88	1	3	3	3	1290	148.438	6.04932
Q9UKK9	ADP-sugar pyrophosphatase OS=Homo sapiens GN=NUDT5 PE=1 SV=1 - [NUDT5_HUMAN]	131.93	16.89	1	3	3	3	219	24.3122	4.94482
O43169	Cytochrome b5 type B OS=Homo sapiens OX=9606 GN=CYB5B PE=1 SV=3 - [CYB5B_HUMAN]	131.93	30.67	1	2	2	2	150	16.6841	4.97021
Q8NC51	Plasminogen activator inhibitor 1 RNA-binding protein OS=Homo sapiens GN=SERBP1 PE=1 SV=2 - [PAIRB_HUMAN]	131.89	10.05	1	3	3	4	408	44.9385	8.646
Q14C86	GTPase-activating protein and VPS9 domain-containing protein 1 OS=Homo sapiens GN=GAPVD1 PE=1 SV=2 - [GAPD1_HUMAN]	131.39	1.96	1	2	2	3	1478	164.877	5.22412
P23258	Tubulin gamma-1 chain OS=Homo sapiens GN=TUBG1 PE=1 SV=2 - [TBG1_HUMAN]	131.16	7.32	2	2	2	3	451	51.1378	6.13818
Q13724	Mannosyl-oligosaccharide glucosidase OS=Homo sapiens GN=MOGS PE=1 SV=5 - [MOGS_HUMAN]	130.8	5.73	1	3	3	3	837	91.8606	8.89502
Q96J84	Kin of IRRE-like protein 1 OS=Homo sapiens GN=KIRREL PE=1 SV=2 - [KIRR1_HUMAN]	130.68	5.81	1	3	3	3	757	83.4838	5.73193
O43143	Putative pre-mRNA-splicing factor ATP-dependent RNA helicase DHX15 OS=Homo sapiens GN=DHX15 PE=1 SV=2 - [DHX15_HUMAN]	130.32	5.66	1	3	3	3	795	90.8752	7.45947
P08473	Neprilysin OS=Homo sapiens GN=MME PE=1 SV=2 - [NEP_HUMAN]	130.32	8	1	4	4	4	750	85.4599	5.73193
Q96FZ7	Charged multivesicular body protein 6 OS=Homo sapiens GN=CHMP6 PE=1 SV=3 - [CHMP6_HUMAN]	130.18	12.44	1	2	2	3	201	23.4703	5.31299
Q9Y383	Putative RNA-binding protein Luc7-like 2 OS=Homo sapiens GN=LUC7L2 PE=1 SV=2 - [LC7L2_HUMAN]	129.94	4.08	1	1	1	2	392	46.4856	10.0083
P28062	Proteasome subunit beta type-8 OS=Homo sapiens GN=PSMB8 PE=1 SV=3 - [PSB8_HUMAN]	129.84	10.14	1	2	2	2	276	30.3346	7.43018
P61011	Signal recognition particle 54 kDa protein OS=Homo sapiens GN=SRP54 PE=1 SV=1 - [SRP54_HUMAN]	129.7	5.56	1	3	3	3	504	55.6683	8.74854
Q13185	Chromobox protein homolog 3 OS=Homo sapiens GN=CBX3 PE=1 SV=4 - [CBX3_HUMAN]	129.64	31.69	2	3	3	3	183	20.7984	5.32568
Q6IAA8	Ragulator complex protein LAMTOR1 OS=Homo sapiens GN=LAMTOR1 PE=1 SV=2 - [LTOR1_HUMAN]	129.62	9.94	1	1	1	2	161	17.7338	5.14795
Q9BY32	Inosine triphosphate pyrophosphatase OS=Homo sapiens GN=ITPA PE=1 SV=2 - [ITPA_HUMAN]	129.48	27.32	1	3	3	3	194	21.4319	5.65576
Q13496	Myotubularin OS=Homo sapiens GN=MTM1 PE=1 SV=2 - [MTM1_HUMAN]	129.4	6.3	1	2	2	2	603	69.8876	8.17725
Q9UHV9	Prefoldin subunit 2 OS=Homo sapiens GN=PFDN2 PE=1 SV=1 - [PFD2_HUMAN]	129.4	16.88	1	2	2	2	154	16.6376	6.58057
P57729	Ras-related protein Rab-38 OS=Homo sapiens GN=RAB38 PE=1 SV=1 - [RAB38_HUMAN]	129.33	18.01	1	2	3	4	211	23.697	7.76709
O15400	Syntaxin-7 OS=Homo sapiens GN=STX7 PE=1 SV=4 - [STX7_HUMAN]	129.27	19.16	1	2	2	2	261	29.7973	5.5542
P19525	Interferon-induced, double-stranded RNA-activated protein kinase OS=Homo sapiens GN=EIF2AK2 PE=1 SV=2 - [E2AK2_HUMAN]	129.24	9.07	1	3	3	3	551	62.0556	8.39697
Q9Y3U8	60S ribosomal protein L36 OS=Homo sapiens GN=RPL36 PE=1 SV=3 - [RL36_HUMAN]	128.52	11.43	1	2	2	2	105	12.2459	11.5903
O75340	Programmed cell death protein 6 OS=Homo sapiens GN=PDCD6 PE=1 SV=1 - [PDCD6_HUMAN]	127.22	9.95	1	2	2	3	191	21.8548	5.40186
Q9UHL4	Dipeptidyl peptidase 2 OS=Homo sapiens GN=DPP7 PE=1 SV=3 - [DPP2_HUMAN]	127.17	11.59	1	3	3	3	492	54.3072	6.31592
Q9Y570	Protein phosphatase methylesterase 1 OS=Homo sapiens GN=PPME1 PE=1 SV=3 - [PPME1_HUMAN]	127	13.99	1	4	5	6	386	42.2882	5.97314
O75663	TIP41-like protein OS=Homo sapiens GN=TIPRL PE=1 SV=2 - [TIPRL_HUMAN]	126.97	20.96	1	3	3	4	272	31.4237	5.90967
Q99943	1-acyl-sn-glycerol-3-phosphate acyltransferase alpha OS=Homo sapiens GN=AGPAT1 PE=2 SV=2 - [PLCA_HUMAN]	126.82	7.42	1	1	1	2	283	31.6957	9.37842
P78344	Eukaryotic translation initiation factor 4 gamma 2 OS=Homo sapiens GN=EIF4G2 PE=1 SV=1 - [IF4G2_HUMAN]	126.35	5.4	1	3	3	3	907	102.297	7.13721
O14817	Tetraspanin-4 OS=Homo sapiens GN=TSPAN4 PE=1 SV=1 - [TSN4_HUMAN]	126.19	20.17	1	2	2	2	238	26.1002	6.46826
P40123	Adenylyl cyclase-associated protein 2 OS=Homo sapiens GN=CAP2 PE=1 SV=1 - [CAP2_HUMAN]	125.66	5.45	1	2	2	2	477	52.7908	6.3667
Q13740	CD166 antigen OS=Homo sapiens GN=ALCAM PE=1 SV=2 - [CD166_HUMAN]	125.66	7.38	1	2	2	3	583	65.0611	6.25244
P62993	Growth factor receptor-bound protein 2 OS=Homo sapiens GN=GRB2 PE=1 SV=1 - [GRB2_HUMAN]	125.18	13.36	1	1	1	2	217	25.1904	6.31592
Q92974	Rho guanine nucleotide exchange factor 2 OS=Homo sapiens GN=ARHGEF2 PE=1 SV=4 - [ARHG2_HUMAN]	125.13	2.23	1	2	2	2	986	111.473	7.26904
Q8N9N7	Leucine-rich repeat-containing protein 57 OS=Homo sapiens GN=LRRC57 PE=1 SV=1 - [LRC57_HUMAN]	124.69	9.62	1	2	2	3	239	26.7373	8.42627
P0DMP2	SLIT-ROBO Rho GTPase-activating protein 2B OS=Homo sapiens GN=SRGAP2B PE=3 SV=1 - [SRG2B_HUMAN]	124.56	6.77	4	2	2	2	458	53.3718	6.85889
Q8TD43	Transient receptor potential cation channel subfamily M member 4 OS=Homo sapiens GN=TRPM4 PE=1 SV=1 - [TRPM4_HUMAN]	124.14	3.95	1	2	2	3	1214	134.215	8.14795
Q9UBC2	Epidermal growth factor receptor substrate 15-like 1 OS=Homo sapiens GN=EPS15L1 PE=1 SV=1 - [EP15R_HUMAN]	124.07	7.06	1	3	4	4	864	94.197	5.10986
O00629	Importin subunit alpha-4 OS=Homo sapiens GN=KPNA4 PE=1 SV=1 - [IMA4_HUMAN]	124.03	14.78	1	1	4	4	521	57.8506	4.95752
Q96C19	EF-hand domain-containing protein D2 OS=Homo sapiens GN=EFHD2 PE=1 SV=1 - [EFHD2_HUMAN]	124.01	10.83	2	3	3	3	240	26.6805	5.19873
P29966	Myristoylated alanine-rich C-kinase substrate OS=Homo sapiens GN=MARCKS PE=1 SV=4 - [MARCS_HUMAN]	123.68	15.36	1	2	2	2	332	31.5359	4.44971
P20073	Annexin A7 OS=Homo sapiens GN=ANXA7 PE=1 SV=3 - [ANXA7_HUMAN]	123.65	5.53	1	2	2	2	488	52.7058	5.68115
P24666	Low molecular weight phosphotyrosine protein phosphatase OS=Homo sapiens GN=ACP1 PE=1 SV=3 - [PPAC_HUMAN]	123.45	13.29	1	2	2	2	158	18.0308	6.7417
O75533	Splicing factor 3B subunit 1 OS=Homo sapiens GN=SF3B1 PE=1 SV=3 - [SF3B1_HUMAN]	123.4	3.83	1	3	3	3	1304	145.738	7.09326
Q9UJU6	Drebrin-like protein OS=Homo sapiens GN=DBNL PE=1 SV=1 - [DBNL_HUMAN]	123.39	6.74	1	2	2	2	430	48.1776	5.04639
Q9Y316	Protein MEMO1 OS=Homo sapiens GN=MEMO1 PE=1 SV=1 - [MEMO1_HUMAN]	123.33	12.12	1	2	2	3	297	33.7115	7.13721
P67809	Nuclease-sensitive element-binding protein 1 OS=Homo sapiens GN=YBX1 PE=1 SV=3 - [YBOX1_HUMAN]	122.78	9.26	1	1	1	5	324	35.9027	9.87646
Q92625	Ankyrin repeat and SAM domain-containing protein 1A OS=Homo sapiens GN=ANKS1A PE=1 SV=4 - [ANS1A_HUMAN]	122.78	7.05	1	3	3	3	1134	123.032	6.37939
Q02809	Procollagen-lysine,2-oxoglutarate 5-dioxygenase 1 OS=Homo sapiens GN=PLOD1 PE=1 SV=2 - [PLOD1_HUMAN]	122.33	6.19	1	3	3	3	727	83.4974	6.94678
P24539	ATP synthase subunit b, mitochondrial OS=Homo sapiens GN=ATP5F1 PE=1 SV=2 - [AT5F1_HUMAN]	122.24	5.86	1	1	1	2	256	28.8903	9.36377
Q9Y5X2	Sorting nexin-8 OS=Homo sapiens GN=SNX8 PE=1 SV=1 - [SNX8_HUMAN]	122.2	5.81	1	2	2	2	465	52.5361	7.38623
Q99961	Endophilin-A2 OS=Homo sapiens GN=SH3GL1 PE=1 SV=1 - [SH3G1_HUMAN]	122.18	5.43	1	1	1	1	368	41.464	5.42725
Q9BRA2	Thioredoxin domain-containing protein 17 OS=Homo sapiens GN=TXNDC17 PE=1 SV=1 - [TXD17_HUMAN]	121.79	19.51	1	2	2	3	123	13.9318	5.51611
O60462	Neuropilin-2 OS=Homo sapiens OX=9606 GN=NRP2 PE=1 SV=3 - [NRP2_HUMAN]	121.48	4.19	1	3	3	3	931	104.764	5.17334
Q92845	Kinesin-associated protein 3 OS=Homo sapiens GN=KIFAP3 PE=1 SV=2 - [KIFA3_HUMAN]	121.41	2.53	1	1	1	1	792	91.1465	5.08447
Q6ZUX7	Lipoma HMGIC fusion partner-like 2 protein OS=Homo sapiens GN=LHFPL2 PE=2 SV=2 - [LHPL2_HUMAN]	121.36	10.96	1	1	1	2	228	24.4693	6.49365
P35268	60S ribosomal protein L22 OS=Homo sapiens GN=RPL22 PE=1 SV=2 - [RL22_HUMAN]	121.05	39.06	1	3	3	3	128	14.7778	9.18799
Q9BV36	Melanophilin OS=Homo sapiens GN=MLPH PE=1 SV=1 - [MELPH_HUMAN]	120.93	3.5	1	1	1	2	600	65.9088	6.07471
Q9H2V7	Protein spinster homolog 1 OS=Homo sapiens GN=SPNS1 PE=1 SV=1 - [SPNS1_HUMAN]	120.18	5.49	1	1	1	1	528	56.5937	6.63916
Q14376	UDP-glucose 4-epimerase OS=Homo sapiens GN=GALE PE=1 SV=2 - [GALE_HUMAN]	119.42	12.36	1	3	3	3	348	38.2573	6.72705
P19256	Lymphocyte function-associated antigen 3 OS=Homo sapiens GN=CD58 PE=1 SV=1 - [LFA3_HUMAN]	119.26	9.2	1	2	2	2	250	28.1289	6.75635
P06132	Uroporphyrinogen decarboxylase OS=Homo sapiens GN=UROD PE=1 SV=2 - [DCUP_HUMAN]	118.97	14.17	1	2	2	2	367	40.7608	6.13818
Q8NBQ5	Estradiol 17-beta-dehydrogenase 11 OS=Homo sapiens GN=HSD17B11 PE=1 SV=3 - [DHB11_HUMAN]	118.95	8	1	2	2	2	300	32.9147	9.0708
Q658P3	Metalloreductase STEAP3 OS=Homo sapiens GN=STEAP3 PE=1 SV=2 - [STEA3_HUMAN]	118.81	8.2	1	3	3	3	488	54.5658	8.60205
Q9BXJ9	N-alpha-acetyltransferase 15, NatA auxiliary subunit OS=Homo sapiens GN=NAA15 PE=1 SV=1 - [NAA15_HUMAN]	118.73	3.81	2	3	3	3	866	101.208	7.41553
Q9UP95	Solute carrier family 12 member 4 OS=Homo sapiens GN=SLC12A4 PE=1 SV=2 - [S12A4_HUMAN]	118.31	2.67	2	2	2	2	1085	120.572	6.44287
Q99436	Proteasome subunit beta type-7 OS=Homo sapiens GN=PSMB7 PE=1 SV=1 - [PSB7_HUMAN]	117.48	18.41	1	2	2	2	277	29.9462	7.6792
O94905	Erlin-2 OS=Homo sapiens GN=ERLIN2 PE=1 SV=1 - [ERLN2_HUMAN]	117.11	12.39	2	3	3	3	339	37.8155	5.61768
Q9BXI6	TBC1 domain family member 10A OS=Homo sapiens GN=TBC1D10A PE=1 SV=1 - [TB10A_HUMAN]	117.08	4.53	1	1	1	1	508	57.0813	8.44092
Q13459	Unconventional myosin-IXb OS=Homo sapiens GN=MYO9B PE=1 SV=3 - [MYO9B_HUMAN]	116.89	1.99	1	3	3	3	2157	243.249	8.74854
P62805	Histone H4 OS=Homo sapiens GN=HIST1H4A PE=1 SV=2 - [H4_HUMAN]	116.88	31.07	1	3	3	3	103	11.3604	11.356
Q9UID3	Protein fat-free homolog OS=Homo sapiens GN=FFR PE=1 SV=2 - [FFR_HUMAN]	116.53	9.46	1	4	4	4	782	85.9882	6.46826
P52888	Thimet oligopeptidase OS=Homo sapiens GN=THOP1 PE=1 SV=2 - [THOP1_HUMAN]	116.42	6.97	1	2	3	4	689	78.7895	6.04932
Q9H267	Vacuolar protein sorting-associated protein 33B OS=Homo sapiens GN=VPS33B PE=1 SV=2 - [VP33B_HUMAN]	116.36	5.19	1	2	2	2	617	70.5404	6.7124
P12236	ADP/ATP translocase 3 OS=Homo sapiens GN=SLC25A6 PE=1 SV=4 - [ADT3_HUMAN]	116.11	11.41	2	1	3	3	298	32.8452	9.74463
P83731	60S ribosomal protein L24 OS=Homo sapiens GN=RPL24 PE=1 SV=1 - [RL24_HUMAN]	116.03	19.11	1	3	3	3	157	17.7679	11.2534
Q9NR19	Acetyl-coenzyme A synthetase, cytoplasmic OS=Homo sapiens GN=ACSS2 PE=1 SV=1 - [ACSA_HUMAN]	115.97	4.85	1	2	2	2	701	78.5291	6.45557
P40429	60S ribosomal protein L13a OS=Homo sapiens GN=RPL13A PE=1 SV=2 - [RL13A_HUMAN]	115.57	13.79	2	3	3	3	203	23.5624	10.9312
P05090	Apolipoprotein D OS=Homo sapiens GN=APOD PE=1 SV=1 - [APOD_HUMAN]	115.24	13.23	1	2	2	2	189	21.2618	5.14795
P63173	60S ribosomal protein L38 OS=Homo sapiens GN=RPL38 PE=1 SV=2 - [RL38_HUMAN]	114.85	17.14	1	1	1	2	70	8.21273	10.0962
P27695	DNA-(apurinic or apyrimidinic site) lyase OS=Homo sapiens GN=APEX1 PE=1 SV=2 - [APEX1_HUMAN]	114.6	5.35	1	1	1	2	318	35.5322	8.11865
P55735	Protein SEC13 homolog OS=Homo sapiens GN=SEC13 PE=1 SV=3 - [SEC13_HUMAN]	114.58	11.49	1	2	2	2	322	35.5181	5.47803
Q14008	Cytoskeleton-associated protein 5 OS=Homo sapiens GN=CKAP5 PE=1 SV=3 - [CKAP5_HUMAN]	114.33	1.92	1	3	3	3	2032	225.352	7.79639
O15162	Phospholipid scramblase 1 OS=Homo sapiens GN=PLSCR1 PE=1 SV=1 - [PLS1_HUMAN]	114.15	6.29	1	1	1	2	318	35.0259	4.94482
Q92629	Delta-sarcoglycan OS=Homo sapiens GN=SGCD PE=1 SV=2 - [SGCD_HUMAN]	113.9	8.65	1	2	2	2	289	32.0509	9.11475
Q96HE7	ERO1-like protein alpha OS=Homo sapiens GN=ERO1L PE=1 SV=2 - [ERO1A_HUMAN]	113.38	6.62	1	3	3	3	468	54.3581	5.68115
O15126	Secretory carrier-associated membrane protein 1 OS=Homo sapiens GN=SCAMP1 PE=1 SV=2 - [SCAM1_HUMAN]	113.27	6.8	1	1	1	1	338	37.8958	7.41553
Q9P273	Teneurin-3 OS=Homo sapiens GN=ODZ3 PE=2 SV=3 - [TEN3_HUMAN]	113.09	2.52	1	4	4	4	2699	300.76	6.41748
P78324	Tyrosine-protein phosphatase non-receptor type substrate 1 OS=Homo sapiens GN=SIRPA PE=1 SV=2 - [SHPS1_HUMAN]	112.98	6.35	2	2	2	3	504	54.9328	6.97607
Q15813	Tubulin-specific chaperone E OS=Homo sapiens GN=TBCE PE=1 SV=1 - [TBCE_HUMAN]	112.35	9.68	1	3	3	3	527	59.309	6.75635
P42704	Leucine-rich PPR motif-containing protein, mitochondrial OS=Homo sapiens GN=LRPPRC PE=1 SV=3 - [LPPRC_HUMAN]	112.15	2.65	1	2	2	3	1394	157.805	6.12549
Q05209	Tyrosine-protein phosphatase non-receptor type 12 OS=Homo sapiens GN=PTPN12 PE=1 SV=3 - [PTN12_HUMAN]	112.13	4.36	1	2	2	2	780	88.0514	5.61768
Q9UJW0	Dynactin subunit 4 OS=Homo sapiens GN=DCTN4 PE=1 SV=1 - [DCTN4_HUMAN]	112.04	6.74	1	2	2	4	460	52.3036	7.34229
Q16539	Mitogen-activated protein kinase 14 OS=Homo sapiens GN=MAPK14 PE=1 SV=3 - [MK14_HUMAN]	111.91	4.17	1	1	1	2	360	41.267	5.78271
Q9BQA1	Methylosome protein 50 OS=Homo sapiens GN=WDR77 PE=1 SV=1 - [MEP50_HUMAN]	111.73	9.94	1	3	3	3	342	36.7011	5.17334
Q16527	Cysteine and glycine-rich protein 2 OS=Homo sapiens GN=CSRP2 PE=1 SV=3 - [CSRP2_HUMAN]	111.36	7.77	1	1	1	1	193	20.9399	8.6167
O60888	Protein CutA OS=Homo sapiens GN=CUTA PE=1 SV=2 - [CUTA_HUMAN]	111.31	14.53	1	2	2	2	179	19.1041	5.50342
Q8WTW4	Nitrogen permease regulator 2-like protein OS=Homo sapiens GN=NPRL2 PE=1 SV=2 - [NPRL2_HUMAN]	111.2	4.47	1	1	1	1	380	43.6304	6.52197
P42224	Signal transducer and activator of transcription 1-alpha/beta OS=Homo sapiens GN=STAT1 PE=1 SV=2 - [STAT1_HUMAN]	111.19	5.73	1	2	3	3	750	87.2795	6.04932
P48509	CD151 antigen OS=Homo sapiens GN=CD151 PE=1 SV=3 - [CD151_HUMAN]	111.17	10.28	1	3	3	4	253	28.2763	7.47412
Q8N1G4	Leucine-rich repeat-containing protein 47 OS=Homo sapiens GN=LRRC47 PE=1 SV=1 - [LRC47_HUMAN]	111.15	6	1	2	2	2	583	63.4337	8.27979
Q68DA7	Formin-1 OS=Homo sapiens GN=FMN1 PE=1 SV=3 - [FMN1_HUMAN]	111.11	3.66	1	3	3	3	1419	157.48	8.44092
P49366	Deoxyhypusine synthase OS=Homo sapiens GN=DHPS PE=1 SV=1 - [DHYS_HUMAN]	111.06	5.42	1	1	1	2	369	40.9446	5.36377
O75608	Acyl-protein thioesterase 1 OS=Homo sapiens GN=LYPLA1 PE=1 SV=1 - [LYPA1_HUMAN]	110.98	17.39	1	2	2	2	230	24.6535	6.771
P30046	D-dopachrome decarboxylase OS=Homo sapiens GN=DDT PE=1 SV=3 - [DOPD_HUMAN]	110.71	22.88	2	2	2	3	118	12.7037	7.29834
P48059	LIM and senescent cell antigen-like-containing domain protein 1 OS=Homo sapiens GN=LIMS1 PE=1 SV=4 - [LIMS1_HUMAN]	110.67	8.92	2	2	3	4	325	37.2258	8.04541
P42566	Epidermal growth factor receptor substrate 15 OS=Homo sapiens GN=EPS15 PE=1 SV=2 - [EPS15_HUMAN]	110.08	2.12	1	2	2	2	896	98.5948	4.64014
Q13277	Syntaxin-3 OS=Homo sapiens GN=STX3 PE=1 SV=3 - [STX3_HUMAN]	110.08	14.19	1	2	2	2	289	33.1344	5.43994
Q96BJ3	Axin interactor, dorsalization-associated protein OS=Homo sapiens GN=AIDA PE=1 SV=1 - [AIDA_HUMAN]	109.96	7.19	1	1	1	1	306	35.0013	6.55127
Q9NRY6	Phospholipid scramblase 3 OS=Homo sapiens GN=PLSCR3 PE=1 SV=2 - [PLS3_HUMAN]	109.95	6.78	1	1	1	1	295	31.628	6.65381
P78347	General transcription factor II-I OS=Homo sapiens GN=GTF2I PE=1 SV=2 - [GTF2I_HUMAN]	109.92	1.6	1	1	1	3	998	112.346	6.39209
P98196	Probable phospholipid-transporting ATPase IH OS=Homo sapiens GN=ATP11A PE=2 SV=3 - [AT11A_HUMAN]	109.56	4.06	1	2	2	3	1134	129.672	6.59521
Q13085	Acetyl-CoA carboxylase 1 OS=Homo sapiens GN=ACACA PE=1 SV=2 - [ACACA_HUMAN]	109.39	1.45	1	3	3	3	2346	265.385	6.3667
Q68EM7	Rho GTPase-activating protein 17 OS=Homo sapiens GN=ARHGAP17 PE=1 SV=1 - [RHG17_HUMAN]	109.37	4.65	1	3	3	3	881	95.3773	7.62061
Q8IUI8	Cytokine receptor-like factor 3 OS=Homo sapiens GN=CRLF3 PE=1 SV=2 - [CRLF3_HUMAN]	109.26	10.86	1	2	2	2	442	49.7349	5.13525
Q8IZ83	Aldehyde dehydrogenase family 16 member A1 OS=Homo sapiens GN=ALDH16A1 PE=1 SV=2 - [A16A1_HUMAN]	109.25	2.99	1	2	2	2	802	85.0737	6.78564
Q9Y303	Putative N-acetylglucosamine-6-phosphate deacetylase OS=Homo sapiens GN=AMDHD2 PE=2 SV=2 - [NAGA_HUMAN]	108.96	5.13	1	1	1	1	409	43.7206	6.69775
Q8NCA5	Protein FAM98A OS=Homo sapiens OX=9606 GN=FAM98A PE=1 SV=2 - [FA98A_HUMAN]	108.8	2.9	1	1	1	1	518	55.2382	8.95361
Q13308	Inactive tyrosine-protein kinase 7 OS=Homo sapiens GN=PTK7 PE=1 SV=2 - [PTK7_HUMAN]	108.66	2.52	1	2	2	2	1070	118.317	7.09326
P29218	Inositol monophosphatase 1 OS=Homo sapiens GN=IMPA1 PE=1 SV=1 - [IMPA1_HUMAN]	108.58	15.52	1	3	3	4	277	30.1692	5.26221
Q9UN37	Vacuolar protein sorting-associated protein 4A OS=Homo sapiens GN=VPS4A PE=1 SV=1 - [VPS4A_HUMAN]	108.34	9.38	2	1	3	3	437	48.867	7.79639
Q86XA9	HEAT repeat-containing protein 5A OS=Homo sapiens GN=HEATR5A PE=1 SV=2 - [HTR5A_HUMAN]	108.12	2.01	1	2	2	2	2040	221.863	6.58057
Q13564	NEDD8-activating enzyme E1 regulatory subunit OS=Homo sapiens GN=NAE1 PE=1 SV=1 - [ULA1_HUMAN]	107.8	6.74	1	2	2	2	534	60.2086	5.40186
Q9UHY7	Enolase-phosphatase E1 OS=Homo sapiens GN=ENOPH1 PE=1 SV=1 - [ENOPH_HUMAN]	107.68	17.62	1	3	3	3	261	28.9145	4.77979
Q15382	GTP-binding protein Rheb OS=Homo sapiens GN=RHEB PE=1 SV=1 - [RHEB_HUMAN]	107.64	18.48	1	3	3	3	184	20.4845	5.92236
Q9H900	Protein zwilch homolog OS=Homo sapiens GN=ZWILCH PE=1 SV=2 - [ZWILC_HUMAN]	107.16	2.54	1	1	1	2	591	67.1718	6.26514
P42229	Signal transducer and activator of transcription 5A OS=Homo sapiens GN=STAT5A PE=1 SV=1 - [STA5A_HUMAN]	106.99	2.02	1	1	1	1	794	90.5903	6.39209
O95747	Serine/threonine-protein kinase OSR1 OS=Homo sapiens GN=OXSR1 PE=1 SV=1 - [OXSR1_HUMAN]	106.9	9.11	1	3	3	3	527	57.9861	6.43018
Q7Z3C6	Autophagy-related protein 9A OS=Homo sapiens GN=ATG9A PE=1 SV=3 - [ATG9A_HUMAN]	106.36	2.62	1	2	2	3	839	94.387	6.66846
O60664	Perilipin-3 OS=Homo sapiens GN=PLIN3 PE=1 SV=3 - [PLIN3_HUMAN]	106.35	14.29	1	3	3	3	434	47.0459	5.43994
Q9HB90	Ras-related GTP-binding protein C OS=Homo sapiens GN=RRAGC PE=1 SV=1 - [RRAGC_HUMAN]	106.22	5.76	2	2	2	2	399	44.1958	5.09717
Q6UW68	Transmembrane protein 205 OS=Homo sapiens GN=TMEM205 PE=1 SV=1 - [TM205_HUMAN]	105.85	8.99	1	1	1	2	189	21.1839	8.6167
P62166	Neuronal calcium sensor 1 OS=Homo sapiens GN=NCS1 PE=1 SV=2 - [NCS1_HUMAN]	105.61	21.58	1	3	3	3	190	21.8649	4.83057
Q9BV44	THUMP domain-containing protein 3 OS=Homo sapiens GN=THUMPD3 PE=1 SV=1 - [THUM3_HUMAN]	105.06	6.71	1	2	2	2	507	56.9668	6.3667
Q96KP1	Exocyst complex component 2 OS=Homo sapiens GN=EXOC2 PE=1 SV=1 - [EXOC2_HUMAN]	105.04	5.19	1	2	2	2	924	104	6.90283
Q15257	Serine/threonine-protein phosphatase 2A activator OS=Homo sapiens GN=PPP2R4 PE=1 SV=3 - [PTPA_HUMAN]	104.45	15.92	1	3	3	3	358	40.6414	5.93506
O15305	Phosphomannomutase 2 OS=Homo sapiens GN=PMM2 PE=1 SV=1 - [PMM2_HUMAN]	104.4	8.13	1	1	1	1	246	28.0642	6.771
P14550	Alcohol dehydrogenase [NADP(+)] OS=Homo sapiens GN=AKR1A1 PE=1 SV=3 - [AK1A1_HUMAN]	104.39	13.54	1	2	3	3	325	36.5499	6.78564
Q16891	Mitochondrial inner membrane protein OS=Homo sapiens GN=IMMT PE=1 SV=1 - [IMMT_HUMAN]	104.36	2.37	1	2	2	2	758	83.6264	6.48096
Q14683	Structural maintenance of chromosomes protein 1A OS=Homo sapiens GN=SMC1A PE=1 SV=2 - [SMC1A_HUMAN]	104.08	1.7	1	1	2	2	1233	143.144	7.63525
Q96C86	Scavenger mRNA-decapping enzyme DcpS OS=Homo sapiens GN=DCPS PE=1 SV=2 - [DCPS_HUMAN]	103.99	10.39	1	2	2	3	337	38.585	6.37939
P55011	Solute carrier family 12 member 2 OS=Homo sapiens GN=SLC12A2 PE=1 SV=1 - [S12A2_HUMAN]	103.52	2.72	1	3	3	4	1212	131.364	6.40479
Q8N3D4	EH domain-binding protein 1-like protein 1 OS=Homo sapiens GN=EHBP1L1 PE=1 SV=2 - [EH1L1_HUMAN]	103.4	0.98	1	1	1	2	1523	161.756	4.83057
O95352	Ubiquitin-like modifier-activating enzyme ATG7 OS=Homo sapiens GN=ATG7 PE=1 SV=1 - [ATG7_HUMAN]	103.22	2.13	1	1	1	1	703	77.9093	6.23975
P20340	Ras-related protein Rab-6A OS=Homo sapiens GN=RAB6A PE=1 SV=3 - [RAB6A_HUMAN]	103	14.42	10	2	3	3	208	23.5779	5.5415
Q9Y4R8	Telomere length regulation protein TEL2 homolog OS=Homo sapiens GN=TELO2 PE=1 SV=2 - [TELO2_HUMAN]	102.99	4.18	1	2	2	2	837	91.6892	5.75732
P08621	U1 small nuclear ribonucleoprotein 70 kDa OS=Homo sapiens GN=SNRNP70 PE=1 SV=2 - [RU17_HUMAN]	102.92	5.72	1	2	2	3	437	51.5258	9.93506
Q5EBL4	RILP-like protein 1 OS=Homo sapiens GN=RILPL1 PE=1 SV=1 - [RIPL1_HUMAN]	102.84	5.71	1	1	1	1	403	47.079	5.21143
P34897	Serine hydroxymethyltransferase, mitochondrial OS=Homo sapiens GN=SHMT2 PE=1 SV=3 - [GLYM_HUMAN]	102.58	6.94	1	1	2	2	504	55.9577	8.52881
Q9P258	Protein RCC2 OS=Homo sapiens GN=RCC2 PE=1 SV=2 - [RCC2_HUMAN]	102.45	9.2	1	4	4	4	522	56.0492	8.77783
Q9ULF5	Zinc transporter ZIP10 OS=Homo sapiens GN=SLC39A10 PE=1 SV=2 - [S39AA_HUMAN]	102.25	4.09	1	2	2	3	831	94.0727	6.75635
P49257	Protein ERGIC-53 OS=Homo sapiens GN=LMAN1 PE=1 SV=2 - [LMAN1_HUMAN]	101.82	13.33	1	3	3	3	510	57.513	6.771
P61604	10 kDa heat shock protein, mitochondrial OS=Homo sapiens GN=HSPE1 PE=1 SV=2 - [CH10_HUMAN]	101.39	26.47	1	3	3	3	102	10.9249	8.92432
Q07021	Complement component 1 Q subcomponent-binding protein, mitochondrial OS=Homo sapiens GN=C1QBP PE=1 SV=1 - [C1QBP_HUMAN]	101.26	17.73	1	2	2	2	282	31.3426	4.84326
O15371	Eukaryotic translation initiation factor 3 subunit D OS=Homo sapiens GN=EIF3D PE=1 SV=1 - [EIF3D_HUMAN]	101.26	3.83	1	2	2	2	548	63.9324	6.04932
P04259	Keratin, type II cytoskeletal 6B OS=Homo sapiens GN=KRT6B PE=1 SV=5 - [K2C6B_HUMAN]	101.2	5.67	13	1	3	3	564	60.0303	8.00146
P31040	Succinate dehydrogenase [ubiquinone] flavoprotein subunit, mitochondrial OS=Homo sapiens GN=SDHA PE=1 SV=2 - [DHSA_HUMAN]	101.06	2.11	1	1	1	1	664	72.6453	7.38623
Q9H0E2	Toll-interacting protein OS=Homo sapiens GN=TOLLIP PE=1 SV=1 - [TOLIP_HUMAN]	101.05	9.85	1	2	2	2	274	30.2622	5.97314
Q13033	Striatin-3 OS=Homo sapiens GN=STRN3 PE=1 SV=3 - [STRN3_HUMAN]	100.54	4.77	1	2	2	2	797	87.1553	5.36377
Q9C0E2	Exportin-4 OS=Homo sapiens GN=XPO4 PE=1 SV=2 - [XPO4_HUMAN]	100.51	1.74	1	1	1	2	1151	130.056	5.04639
Q9BXS9	Solute carrier family 26 member 6 OS=Homo sapiens GN=SLC26A6 PE=1 SV=1 - [S26A6_HUMAN]	99.93	12.25	1	4	4	4	759	82.914	8.36768
P35232	Prohibitin OS=Homo sapiens GN=PHB PE=1 SV=1 - [PHB_HUMAN]	99.79	4.78	1	1	1	1	272	29.7859	5.75732
Q8N766	Uncharacterized protein KIAA0090 OS=Homo sapiens GN=KIAA0090 PE=1 SV=1 - [K0090_HUMAN]	99.5	2.82	1	2	2	2	993	111.689	7.66455
Q9Y2E4	Disco-interacting protein 2 homolog C OS=Homo sapiens GN=DIP2C PE=2 SV=2 - [DIP2C_HUMAN]	99.45	2.19	1	2	2	2	1556	170.658	7.38623
Q15283	Ras GTPase-activating protein 2 OS=Homo sapiens GN=RASA2 PE=1 SV=3 - [RASA2_HUMAN]	98.99	2.24	1	1	1	1	850	96.5529	7.1958
Q8IUW5	RELT-like protein 1 OS=Homo sapiens GN=RELL1 PE=1 SV=1 - [RELL1_HUMAN]	98.78	8.49	1	1	1	1	271	29.3219	8.33838
Q08AM6	Protein VAC14 homolog OS=Homo sapiens GN=VAC14 PE=1 SV=1 - [VAC14_HUMAN]	98.7	4.35	1	2	2	2	782	87.9167	6.12549
P62070	Ras-related protein R-Ras2 OS=Homo sapiens GN=RRAS2 PE=1 SV=1 - [RRAS2_HUMAN]	98.62	5.88	1	1	1	2	204	23.3847	6.01123
Q9NVS9	Pyridoxine-5'-phosphate oxidase OS=Homo sapiens GN=PNPO PE=1 SV=1 - [PNPO_HUMAN]	98.18	13.41	1	2	2	2	261	29.9688	7.06396
O75348	V-type proton ATPase subunit G 1 OS=Homo sapiens GN=ATP6V1G1 PE=1 SV=3 - [VATG1_HUMAN]	97.71	20.34	2	2	2	2	118	13.7491	8.79248
Q96GG9	DCN1-like protein 1 OS=Homo sapiens GN=DCUN1D1 PE=1 SV=1 - [DCNL1_HUMAN]	97.65	6.56	1	1	1	1	259	30.1051	5.33838
Q9Y2X7	ARF GTPase-activating protein GIT1 OS=Homo sapiens GN=GIT1 PE=1 SV=2 - [GIT1_HUMAN]	97.56	3.94	1	2	2	3	761	84.2888	6.80029
P11279	Lysosome-associated membrane glycoprotein 1 OS=Homo sapiens GN=LAMP1 PE=1 SV=3 - [LAMP1_HUMAN]	97.56	3.84	1	1	1	1	417	44.8538	8.74854
O43739	Cytohesin-3 OS=Homo sapiens GN=CYTH3 PE=2 SV=2 - [CYH3_HUMAN]	97.26	11.25	3	3	3	3	400	46.3194	5.46533
Q9NZB2	Constitutive coactivator of PPAR-gamma-like protein 1 OS=Homo sapiens GN=FAM120A PE=1 SV=2 - [F120A_HUMAN]	97.02	2.42	1	2	2	2	1118	121.811	8.88037
Q15404	Ras suppressor protein 1 OS=Homo sapiens GN=RSU1 PE=1 SV=3 - [RSU1_HUMAN]	96.98	18.05	1	3	3	3	277	31.5207	8.646
Q00325	Phosphate carrier protein, mitochondrial OS=Homo sapiens GN=SLC25A3 PE=1 SV=2 - [MPCP_HUMAN]	96.9	11.33	1	4	4	4	362	40.0687	9.37842
P48960	CD97 antigen OS=Homo sapiens GN=CD97 PE=1 SV=4 - [CD97_HUMAN]	96.84	5.15	1	2	2	2	835	91.8091	6.87354
Q9Y2B0	Protein canopy homolog 2 OS=Homo sapiens GN=CNPY2 PE=1 SV=1 - [CNPY2_HUMAN]	96.83	8.79	1	1	1	1	182	20.6392	4.91943
P31153	S-adenosylmethionine synthase isoform type-2 OS=Homo sapiens GN=MAT2A PE=1 SV=1 - [METK2_HUMAN]	96.79	8.35	2	3	3	3	395	43.6333	6.48096
P46778	60S ribosomal protein L21 OS=Homo sapiens GN=RPL21 PE=1 SV=2 - [RL21_HUMAN]	96.7	31.25	1	4	4	4	160	18.5531	10.4917
Q9Y3B8	Oligoribonuclease, mitochondrial OS=Homo sapiens GN=REXO2 PE=1 SV=3 - [ORN_HUMAN]	96.66	12.24	1	2	2	2	237	26.8156	6.87354
O15427	Monocarboxylate transporter 4 OS=Homo sapiens GN=SLC16A3 PE=1 SV=1 - [MOT4_HUMAN]	96.65	4.52	1	2	2	2	465	49.4369	7.95752
Q6IQ22	Ras-related protein Rab-12 OS=Homo sapiens GN=RAB12 PE=1 SV=3 - [RAB12_HUMAN]	96.62	9.02	9	1	2	2	244	27.2311	8.41162
Q96EK5	KIF1-binding protein OS=Homo sapiens GN=KIAA1279 PE=1 SV=1 - [KBP_HUMAN]	96.52	3.06	1	1	1	1	621	71.7684	5.49072
P26368	Splicing factor U2AF 65 kDa subunit OS=Homo sapiens GN=U2AF2 PE=1 SV=4 - [U2AF2_HUMAN]	96.45	5.47	1	2	2	2	475	53.4672	9.08545
Q15041	ADP-ribosylation factor-like protein 6-interacting protein 1 OS=Homo sapiens GN=ARL6IP1 PE=1 SV=2 - [AR6P1_HUMAN]	96.41	13.79	1	1	1	1	203	23.3474	9.31982
Q15056	Eukaryotic translation initiation factor 4H OS=Homo sapiens GN=EIF4H PE=1 SV=5 - [IF4H_HUMAN]	96.23	16.94	1	2	2	2	248	27.3684	7.2251
Q86TI2	Dipeptidyl peptidase 9 OS=Homo sapiens GN=DPP9 PE=1 SV=3 - [DPP9_HUMAN]	96.21	1.97	1	1	1	2	863	98.201	6.45557
P46109	Crk-like protein OS=Homo sapiens GN=CRKL PE=1 SV=1 - [CRKL_HUMAN]	96	10.56	1	2	2	2	303	33.7559	6.7417
Q5TAQ9	DDB1- and CUL4-associated factor 8 OS=Homo sapiens GN=DCAF8 PE=1 SV=1 - [DCAF8_HUMAN]	95.94	3.35	1	1	1	2	597	66.8111	5.38916
O75674	TOM1-like protein 1 OS=Homo sapiens GN=TOM1L1 PE=1 SV=2 - [TM1L1_HUMAN]	95.87	3.36	1	1	1	2	476	52.9557	5.23682
P51511	Matrix metalloproteinase-15 OS=Homo sapiens GN=MMP15 PE=1 SV=1 - [MMP15_HUMAN]	95.47	2.99	2	1	2	2	669	75.7589	7.45947
Q9GZZ9	Ubiquitin-like modifier-activating enzyme 5 OS=Homo sapiens GN=UBA5 PE=1 SV=1 - [UBA5_HUMAN]	95.43	8.17	1	2	2	2	404	44.8343	4.84326
Q15036	Sorting nexin-17 OS=Homo sapiens GN=SNX17 PE=1 SV=1 - [SNX17_HUMAN]	95.37	6.6	1	2	2	2	470	52.8682	7.45947
P13716	Delta-aminolevulinic acid dehydratase OS=Homo sapiens GN=ALAD PE=1 SV=1 - [HEM2_HUMAN]	95.34	17.27	1	2	2	2	330	36.2714	6.78564
P53582	Methionine aminopeptidase 1 OS=Homo sapiens GN=METAP1 PE=1 SV=2 - [AMPM1_HUMAN]	95.19	3.37	1	1	1	3	386	43.1873	7.1665
Q9P000	COMM domain-containing protein 9 OS=Homo sapiens GN=COMMD9 PE=1 SV=2 - [COMD9_HUMAN]	95.05	8.08	1	1	1	1	198	21.8054	5.88428
P30536	Translocator protein OS=Homo sapiens GN=TSPO PE=1 SV=3 - [TSPOA_HUMAN]	95.02	13.61	1	1	1	2	169	18.8156	9.36377
P61513	60S ribosomal protein L37a OS=Homo sapiens GN=RPL37A PE=1 SV=2 - [RL37A_HUMAN]	94.94	19.57	1	1	1	1	92	10.2685	10.4331
Q9BXW6	Oxysterol-binding protein-related protein 1 OS=Homo sapiens GN=OSBPL1A PE=1 SV=2 - [OSBL1_HUMAN]	94.84	3.16	1	2	2	2	950	108.401	6.37939
Q06203	Amidophosphoribosyltransferase OS=Homo sapiens GN=PPAT PE=1 SV=1 - [PUR1_HUMAN]	94.74	4.06	1	2	2	2	517	57.3624	6.75635
P52569	Cationic amino acid transporter 2 OS=Homo sapiens GN=SLC7A2 PE=1 SV=2 - [CTR2_HUMAN]	94.71	6.23	1	1	2	2	658	71.6261	7.28369
O14773	Tripeptidyl-peptidase 1 OS=Homo sapiens GN=TPP1 PE=1 SV=2 - [TPP1_HUMAN]	94.69	2.49	1	1	1	1	563	61.2096	6.48096
O43156	TELO2-interacting protein 1 homolog OS=Homo sapiens GN=TTI1 PE=1 SV=3 - [TTI1_HUMAN]	94.54	1.56	1	1	1	1	1089	121.992	5.97314
Q8N6M0	OTU domain-containing protein 6B OS=Homo sapiens GN=OTUD6B PE=1 SV=1 - [OTU6B_HUMAN]	94.54	6.14	1	2	2	2	293	33.7915	6.04932
Q8IXQ6	Poly [ADP-ribose] polymerase 9 OS=Homo sapiens GN=PARP9 PE=1 SV=2 - [PARP9_HUMAN]	94.49	1.87	1	1	1	2	854	96.2814	7.91357
Q969X1	Protein lifeguard 3 OS=Homo sapiens GN=TMBIM1 PE=1 SV=2 - [LFG3_HUMAN]	94.44	4.5	1	1	1	1	311	34.5846	7.72314
Q92945	Far upstream element-binding protein 2 OS=Homo sapiens GN=KHSRP PE=1 SV=4 - [FUBP2_HUMAN]	94.43	4.08	1	2	2	2	711	73.07	7.29834
Q15021	Condensin complex subunit 1 OS=Homo sapiens GN=NCAPD2 PE=1 SV=3 - [CND1_HUMAN]	94.26	1.28	1	1	1	1	1401	157.082	6.60986
P08962	CD63 antigen OS=Homo sapiens GN=CD63 PE=1 SV=2 - [CD63_HUMAN]	94.24	10.08	1	3	3	3	238	25.6191	7.81104
P17081	Rho-related GTP-binding protein RhoQ OS=Homo sapiens GN=RHOQ PE=1 SV=2 - [RHOQ_HUMAN]	94.17	6.83	1	1	1	1	205	22.6445	6.31592
P60510	Serine/threonine-protein phosphatase 4 catalytic subunit OS=Homo sapiens GN=PPP4C PE=1 SV=1 - [PP4C_HUMAN]	94.13	8.79	1	1	2	2	307	35.0574	5.05908
P61081	NEDD8-conjugating enzyme Ubc12 OS=Homo sapiens GN=UBE2M PE=1 SV=1 - [UBC12_HUMAN]	94.12	20.77	1	3	3	3	183	20.8866	7.69385
Q9ULH0	Kinase D-interacting substrate of 220 kDa OS=Homo sapiens GN=KIDINS220 PE=1 SV=3 - [KDIS_HUMAN]	94.03	1.19	1	1	1	2	1771	196.419	6.62451
P49006	MARCKS-related protein OS=Homo sapiens GN=MARCKSL1 PE=1 SV=2 - [MRP_HUMAN]	94.03	17.95	1	1	1	1	195	19.5172	4.66553
P52434	DNA-directed RNA polymerases I, II, and III subunit RPABC3 OS=Homo sapiens GN=POLR2H PE=1 SV=4 - [RPAB3_HUMAN]	93.86	12.67	1	1	1	1	150	17.1324	4.67822
Q8N474	Secreted frizzled-related protein 1 OS=Homo sapiens GN=SFRP1 PE=1 SV=1 - [SFRP1_HUMAN]	93.7	9.87	1	2	2	2	314	35.3621	8.85107
P27448	MAP/microtubule affinity-regulating kinase 3 OS=Homo sapiens OX=9606 GN=MARK3 PE=1 SV=5 - [MARK3_HUMAN]	93.62	2.26	1	1	1	2	753	84.3761	9.56885
Q92879	CUGBP Elav-like family member 1 OS=Homo sapiens GN=CELF1 PE=1 SV=2 - [CELF1_HUMAN]	93.31	7.41	1	2	2	4	486	52.0299	8.45557
Q13797	Integrin alpha-9 OS=Homo sapiens GN=ITGA9 PE=1 SV=2 - [ITA9_HUMAN]	93.27	3.48	1	2	2	2	1035	114.415	6.13818
P51808	Dynein light chain Tctex-type 3 OS=Homo sapiens GN=DYNLT3 PE=1 SV=1 - [DYLT3_HUMAN]	93.27	43.97	1	2	2	2	116	13.0532	5.65576
P11047	Laminin subunit gamma-1 OS=Homo sapiens GN=LAMC1 PE=1 SV=3 - [LAMC1_HUMAN]	93.11	1.68	2	2	2	2	1609	177.489	5.12256
P10253	Lysosomal alpha-glucosidase OS=Homo sapiens GN=GAA PE=1 SV=4 - [LYAG_HUMAN]	93.02	5.99	1	3	3	3	952	105.257	5.99854
Q9Y333	U6 snRNA-associated Sm-like protein LSm2 OS=Homo sapiens GN=LSM2 PE=1 SV=1 - [LSM2_HUMAN]	92.79	20	1	1	1	1	95	10.8276	6.52197
P08240	Signal recognition particle receptor subunit alpha OS=Homo sapiens GN=SRPR PE=1 SV=2 - [SRPR_HUMAN]	92.61	5.02	1	1	1	1	638	69.7672	8.95361
O75223	Gamma-glutamylcyclotransferase OS=Homo sapiens GN=GGCT PE=1 SV=1 - [GGCT_HUMAN]	92.57	12.23	1	1	1	1	188	20.9943	5.13525
Q12974	Protein tyrosine phosphatase type IVA 2 OS=Homo sapiens GN=PTP4A2 PE=1 SV=1 - [TP4A2_HUMAN]	91.87	31.14	1	1	3	3	167	19.1148	8.36768
P46776	60S ribosomal protein L27a OS=Homo sapiens GN=RPL27A PE=1 SV=2 - [RL27A_HUMAN]	91.64	19.59	1	3	3	3	148	16.551	11.0044
P62316	Small nuclear ribonucleoprotein Sm D2 OS=Homo sapiens GN=SNRPD2 PE=1 SV=1 - [SMD2_HUMAN]	91.6	16.1	1	1	1	2	118	13.5182	9.90576
Q9NW97	Transmembrane protein 51 OS=Homo sapiens GN=TMEM51 PE=1 SV=1 - [TMM51_HUMAN]	91.41	14.23	1	1	1	1	253	27.7421	5.52881
Q8WU90	Zinc finger CCCH domain-containing protein 15 OS=Homo sapiens GN=ZC3H15 PE=1 SV=1 - [ZC3HF_HUMAN]	91.25	5.16	1	2	2	2	426	48.5726	5.31299
O60266	Adenylate cyclase type 3 OS=Homo sapiens GN=ADCY3 PE=1 SV=3 - [ADCY3_HUMAN]	91.07	4.72	1	2	2	2	1144	128.877	6.58057
P61587	Rho-related GTP-binding protein RhoE OS=Homo sapiens GN=RND3 PE=1 SV=1 - [RND3_HUMAN]	90.72	9.02	1	2	2	2	244	27.3507	8.48486
Q8NBR6	Protein FAM63B OS=Homo sapiens GN=FAM63B PE=1 SV=2 - [FA63B_HUMAN]	90.7	2.58	1	1	1	1	621	67.0645	4.51318
Q13951	Core-binding factor subunit beta OS=Homo sapiens GN=CBFB PE=1 SV=2 - [PEBB_HUMAN]	90.64	8.79	1	1	1	1	182	21.4947	6.59521
Q7Z5G4	Golgin subfamily A member 7 OS=Homo sapiens GN=GOLGA7 PE=1 SV=2 - [GOGA7_HUMAN]	90.56	10.95	1	1	1	1	137	15.814	7.04932
P37108	Signal recognition particle 14 kDa protein OS=Homo sapiens GN=SRP14 PE=1 SV=2 - [SRP14_HUMAN]	90.51	10.29	1	1	1	1	136	14.5608	10.0376
P12235	ADP/ATP translocase 1 OS=Homo sapiens GN=SLC25A4 PE=1 SV=4 - [ADT1_HUMAN]	90.5	10.07	2	2	3	3	298	33.0432	9.75928
P62269	40S ribosomal protein S18 OS=Homo sapiens GN=RPS18 PE=1 SV=3 - [RS18_HUMAN]	90.19	11.18	1	2	2	2	152	17.7079	10.9897
P43250	G protein-coupled receptor kinase 6 OS=Homo sapiens GN=GRK6 PE=1 SV=2 - [GRK6_HUMAN]	89.92	2.43	2	1	1	1	576	65.9486	8.00146
Q9BZV1	UBX domain-containing protein 6 OS=Homo sapiens GN=UBXN6 PE=1 SV=1 - [UBXN6_HUMAN]	89.88	4.31	1	1	1	1	441	49.7229	6.88818
Q5H9R7	Serine/threonine-protein phosphatase 6 regulatory subunit 3 OS=Homo sapiens GN=PPP6R3 PE=1 SV=2 - [PP6R3_HUMAN]	89.57	4.01	1	2	2	2	873	97.6076	4.60205
Q96AC1	Fermitin family homolog 2 OS=Homo sapiens GN=FERMT2 PE=1 SV=1 - [FERM2_HUMAN]	89.57	5.88	1	2	3	3	680	77.8106	6.69775
P42345	Serine/threonine-protein kinase mTOR OS=Homo sapiens GN=MTOR PE=1 SV=1 - [MTOR_HUMAN]	89.53	1.57	1	2	2	2	2549	288.707	7.1665
Q9Y5S2	Serine/threonine-protein kinase MRCK beta OS=Homo sapiens GN=CDC42BPB PE=1 SV=2 - [MRCKB_HUMAN]	89.5	2.81	1	2	2	3	1711	194.193	6.3667
Q9BTV4	Transmembrane protein 43 OS=Homo sapiens GN=TMEM43 PE=1 SV=1 - [TMM43_HUMAN]	89.37	11.5	1	3	3	3	400	44.8472	8.1333
Q9P0K7	Ankycorbin OS=Homo sapiens GN=RAI14 PE=1 SV=2 - [RAI14_HUMAN]	89.33	1.94	1	1	1	1	980	109.973	6.21436
Q1KMD3	Heterogeneous nuclear ribonucleoprotein U-like protein 2 OS=Homo sapiens GN=HNRNPUL2 PE=1 SV=1 - [HNRL2_HUMAN]	89.29	4.82	1	2	2	2	747	85.0522	4.90674
Q9NZL4	Hsp70-binding protein 1 OS=Homo sapiens OX=9606 GN=HSPBP1 PE=1 SV=2 - [HPBP1_HUMAN]	89.24	6.13	1	2	2	2	359	39.2775	5.21143
Q9BQG0	Myb-binding protein 1A OS=Homo sapiens GN=MYBBP1A PE=1 SV=2 - [MBB1A_HUMAN]	89.19	1.43	1	1	1	1	1328	148.762	9.27588
O43451	Maltase-glucoamylase, intestinal OS=Homo sapiens GN=MGAM PE=1 SV=5 - [MGA_HUMAN]	88.97	1.56	2	2	2	3	1857	209.72	5.50342
P55957	BH3-interacting domain death agonist OS=Homo sapiens GN=BID PE=1 SV=1 - [BID_HUMAN]	88.38	7.69	1	1	1	1	195	21.981	5.43994
Q9HBA0	Transient receptor potential cation channel subfamily V member 4 OS=Homo sapiens GN=TRPV4 PE=1 SV=2 - [TRPV4_HUMAN]	88.35	7.35	1	3	3	3	871	98.2184	7.76709
Q13618	Cullin-3 OS=Homo sapiens GN=CUL3 PE=1 SV=2 - [CUL3_HUMAN]	88.1	2.47	1	2	2	2	768	88.8735	8.48486
Q6XQN6	Nicotinate phosphoribosyltransferase OS=Homo sapiens GN=NAPRT PE=1 SV=2 - [PNCB_HUMAN]	87.97	7.99	1	2	2	2	538	57.542	5.68115
Q05655	Protein kinase C delta type OS=Homo sapiens GN=PRKCD PE=1 SV=2 - [KPCD_HUMAN]	87.91	1.78	1	1	1	1	676	77.4549	7.75244
P62857	40S ribosomal protein S28 OS=Homo sapiens GN=RPS28 PE=1 SV=1 - [RS28_HUMAN]	87.8	17.39	1	1	1	1	69	7.8362	10.6968
Q9GZT4	Serine racemase OS=Homo sapiens GN=SRR PE=1 SV=1 - [SRR_HUMAN]	87.67	4.41	1	1	1	1	340	36.5431	6.53662
Q06136	3-ketodihydrosphingosine reductase OS=Homo sapiens GN=KDSR PE=1 SV=1 - [KDSR_HUMAN]	87.57	4.82	1	1	1	2	332	36.1636	7.12256
P62913	60S ribosomal protein L11 OS=Homo sapiens GN=RPL11 PE=1 SV=2 - [RL11_HUMAN]	87.5	7.87	1	1	1	1	178	20.2396	9.59814
Q14964	Ras-related protein Rab-39A OS=Homo sapiens GN=RAB39A PE=2 SV=2 - [RB39A_HUMAN]	87.33	13.36	9	1	2	2	217	24.9907	7.6499
Q9BPX3	Condensin complex subunit 3 OS=Homo sapiens GN=NCAPG PE=1 SV=1 - [CND3_HUMAN]	87.32	1.58	1	1	1	2	1015	114.262	5.59229
Q03405	Urokinase plasminogen activator surface receptor OS=Homo sapiens GN=PLAUR PE=1 SV=1 - [UPAR_HUMAN]	87.17	6.87	1	1	1	2	335	36.9533	6.65381
Q6PGP7	Tetratricopeptide repeat protein 37 OS=Homo sapiens GN=TTC37 PE=1 SV=1 - [TTC37_HUMAN]	87.16	1.98	1	2	2	2	1564	175.375	7.53271
Q9NRN7	L-aminoadipate-semialdehyde dehydrogenase-phosphopantetheinyl transferase OS=Homo sapiens GN=AASDHPPT PE=1 SV=2 - [ADPPT_HUMAN]	86.98	10.36	1	3	3	3	309	35.7531	6.80029
Q15102	Platelet-activating factor acetylhydrolase IB subunit gamma OS=Homo sapiens GN=PAFAH1B3 PE=1 SV=1 - [PA1B3_HUMAN]	86.95	9.09	1	1	1	1	231	25.7182	6.84424
P02792	Ferritin light chain OS=Homo sapiens GN=FTL PE=1 SV=2 - [FRIL_HUMAN]	86.95	8.57	1	1	1	1	175	20.0071	5.78271
Q9UBT2	SUMO-activating enzyme subunit 2 OS=Homo sapiens GN=UBA2 PE=1 SV=2 - [SAE2_HUMAN]	86.87	4.06	1	1	1	1	640	71.1792	5.2876
Q9H2U1	Probable ATP-dependent RNA helicase DHX36 OS=Homo sapiens GN=DHX36 PE=1 SV=2 - [DHX36_HUMAN]	86.85	3.77	1	3	3	3	1008	114.688	7.6792
Q04837	Single-stranded DNA-binding protein, mitochondrial OS=Homo sapiens GN=SSBP1 PE=1 SV=1 - [SSBP_HUMAN]	86.85	12.16	1	1	1	1	148	17.249	9.59814
P21964	Catechol O-methyltransferase OS=Homo sapiens GN=COMT PE=1 SV=2 - [COMT_HUMAN]	86.58	5.54	1	1	1	1	271	30.0176	5.46533
Q9BSD7	Cancer-related nucleoside-triphosphatase OS=Homo sapiens GN=NTPCR PE=1 SV=1 - [NTPCR_HUMAN]	86.46	20	1	2	2	3	190	20.7001	9.53955
Q9H3K6	BolA-like protein 2 OS=Homo sapiens GN=BOLA2 PE=1 SV=1 - [BOLA2_HUMAN]	86.05	32.56	1	2	2	2	86	10.1102	6.52197
[truncated: 710 more rows]

## Sheet: WM266-4 - Biol. replicate 1
Accession	Description	Score	Coverage	# Proteins	# Unique Peptides	# Peptides	# PSMs	# AAs	MW [kDa]	calc. pI
[truncated: 1,539 more rows]

[truncated: 5 more sheets: WM266-4 - Biol. replicate 2, WM793 - Biol. replicate 1, WM793 - Biol. replicate 2, WM1205Lu - Biol. replicate 1, WM1205Lu - Biol. replicate 2]
