# Supplementary material for: Mass Spectrometry-Based Proteomic Characterization of Cutaneous Melanoma Ectosomes Reveals the Presence of Cancer-Related Molecules
Source: MDPI journal article supplement (doi:10.3390/ijms21082934), 2020-04-22
Supplement: s1 [file s1 › Supplementary Data/Supplementary Data 4.xlsx]

## Sheet: WM115 Gene details
Name of data set: WM115
No. of mapped items: 973
No. of unmapped items: 0
No. of redundant items: 0
Is data set quantitative :NO
Mapped items:
Search Term	Protein			Protein Name	Gene Names	Alternate names
Q9BSJ8	Q9BSJ8			Extended synaptotagmin-1	ESYT1	E-Syt1; Membrane-bound C2 domain-containing protein; FAM62A,; FAM62A,; FAM62A,; FAM62A,; FAM62A,; FAM62A,; FAM62A,; FAM62A,
Q5ZPR3	Q5ZPR3			CD276 antigen	CD276	4Ig-B7-H3; B7 homolog 3; B7-H3; Costimulatory molecule; B7H3; B7H3; B7H3; B7H3; B7H3; B7H3; B7H3
Q15631	Q15631			Translin	TSN	Component 3 of promoter of RISC; C3PO
Q16666	Q16666			Gamma-interferon-inducible protein 16	IFI16	Ifi-16; Interferon-inducible myeloid differentiation transcriptional activator; IFNGIP1; IFNGIP1; IFNGIP1; IFNGIP1; IFNGIP1; IFNGIP1; IFNGIP1; IFNGIP1; IFNGIP1; IFNGIP1; IFNGIP1; IFNGIP1; IFNGIP1
P40123	P40123			Adenylyl cyclase-associated protein 2	CAP2	CAP 2
P30101	P30101			Protein disulfide-isomerase A3	PDIA3	58 kDa glucose-regulated protein; 58 kDa microsomal protein; p58; Disulfide isomerase ER-60; Endoplasmic reticulum resident protein 57; ER protein 57; ERp57; Endoplasmic reticulum resident protein 60; ER protein 60; ERp60; ERP57,; ERP57,; ERP57,; ERP57,; ERP57,
P28072	P28072			Proteasome subunit beta type-6	PSMB6	Macropain delta chain; Multicatalytic endopeptidase complex delta chain; Proteasome delta chain; Proteasome subunit Y; LMPY,; LMPY,
P13639	P13639			Elongation factor 2	EEF2	EF-2; EF2; EF2; EF2; EF2
P41252	P41252			Isoleucine--tRNA ligase, cytoplasmic	IARS	Isoleucyl-tRNA synthetase; IRS; IleRS
Q86VP6	Q86VP6			Cullin-associated NEDD8-dissociated protein 1	CAND1	Cullin-associated and neddylation-dissociated protein 1; TBP-interacting protein of 120 kDa A; TBP-interacting protein 120A; p120 CAND1; KIAA0829,; KIAA0829,; KIAA0829,; KIAA0829,; KIAA0829,; KIAA0829,; KIAA0829,; KIAA0829,; KIAA0829,; KIAA0829,; KIAA0829,
O43865	O43865			Adenosylhomocysteinase 2	AHCYL1	AdoHcyase 2; DC-expressed AHCY-like molecule; IP(3)Rs binding protein released with IP(3); IRBIT; S-adenosyl-L-homocysteine hydrolase 2; S-adenosylhomocysteine hydrolase-like protein 1 {ECO:0000312|HGNC:HGNC:344}; DCAL,; DCAL,; DCAL,; DCAL,; DCAL,; DCAL,; DCAL,; DCAL,
P21980	P21980			Protein-glutamine gamma-glutamyltransferase 2	TGM2	Tissue transglutaminase; Transglutaminase C; TG(C); TGC; TGase C; Transglutaminase H; TGase H; Transglutaminase-2; TGase-2
P05388	P05388			60S acidic ribosomal protein P0	RPLP0	60S ribosomal protein L10E
Q14108	Q14108			Lysosome membrane protein 2	SCARB2	85 kDa lysosomal membrane sialoglycoprotein; LGP85; CD36 antigen-like 2; Lysosome membrane protein II; LIMP II; Scavenger receptor class B member 2; CD36L2,; CD36L2,; CD36L2,; CD36L2,
P07741	P07741			Adenine phosphoribosyltransferase	APRT	APRT
Q99523	Q99523			Sortilin	SORT1	100 kDa NT receptor; Glycoprotein 95; Gp95; Neurotensin receptor 3; NT3; NTR3
Q9Y6G9	Q9Y6G9			Cytoplasmic dynein 1 light intermediate chain 1	DYNC1LI1	LIC1; Dynein light chain A; DLC-A; Dynein light intermediate chain 1, cytosolic; DNCLI1; DNCLI1; DNCLI1; DNCLI1
P50990	P50990			T-complex protein 1 subunit theta	CCT8	TCP-1-theta; CCT-theta; Renal carcinoma antigen NY-REN-15; C21orf112,; C21orf112,; C21orf112,; C21orf112,; C21orf112,
P14868	P14868			Aspartate--tRNA ligase, cytoplasmic	DARS	Aspartyl-tRNA synthetase; AspRS; Cell proliferation-inducing gene 40 protein
P29992	P29992			Guanine nucleotide-binding protein subunit alpha-11	GNA11	G alpha-11; G-protein subunit alpha-11; Guanine nucleotide-binding protein G(y) subunit alpha; GA11; GA11; GA11; GA11
Q01082	Q01082			Spectrin beta chain, non-erythrocytic 1	SPTBN1	Beta-II spectrin; Fodrin beta chain; Spectrin, non-erythroid beta chain 1; SPTB2; SPTB2; SPTB2; SPTB2; SPTB2; SPTB2; SPTB2
O43491	O43491			Band 4.1-like protein 2	EPB41L2	Generally expressed protein 4.1; 4.1G
P49327	P49327			Name: Full=Oleoyl-[acyl-carrier-protein] hydrolase	FASN	FAS; FAS; FAS; FAS; FAS; FAS; FAS; FAS; FAS
P02751	P02751			Fibronectin	FN1	FN; Cold-insoluble globulin; CIG; FN; FN; FN; FN; FN; FN; FN; FN; FN; FN; FN; FN; FN; FN; FN; FN; FN; FN; FN; FN; FN; FN; FN; FN; FN; FN; FN; FN; FN; FN; FN
Q13765	Q13765			Nascent polypeptide-associated complex subunit alpha	NACA	NAC-alpha; Alpha-NAC
Q15029	Q15029			116 kDa U5 small nuclear ribonucleoprotein component	EFTUD2	Elongation factor Tu GTP-binding domain-containing protein 2; SNU114 homolog; hSNU114; U5 snRNP-specific protein, 116 kDa; U5-116 kDa; KIAA0031,; KIAA0031,; KIAA0031,; KIAA0031,; KIAA0031,; KIAA0031,
P04259	P04259			Keratin, type II cytoskeletal 6B	KRT6B	Cytokeratin-6B; CK-6B; Keratin-6B; K6B; Type-II keratin Kb10; K6B,; K6B,
Q13045	Q13045			Protein flightless-1 homolog	FLII	FLIL; FLIL; FLIL; FLIL
O14974	O14974			Protein phosphatase 1 regulatory subunit 12A	PPP1R12A	Myosin phosphatase-targeting subunit 1; Myosin phosphatase target subunit 1; Protein phosphatase myosin-binding subunit; MBS,; MBS,; MBS,; MBS,; MBS,; MBS,; MBS,; MBS,
P18084	P18084			Integrin beta-5	ITGB5
Q13813	Q13813			Spectrin alpha chain, non-erythrocytic 1	SPTAN1	Alpha-II spectrin; Fodrin alpha chain; Spectrin, non-erythroid alpha subunit; NEAS,; NEAS,; NEAS,; NEAS,; NEAS,; NEAS,; NEAS,; NEAS,; NEAS,
Q07812	Q07812			Apoptosis regulator BAX	BAX	Bcl-2-like protein 4; Bcl2-L-4; BCL2L4; BCL2L4; BCL2L4; BCL2L4; BCL2L4; BCL2L4; BCL2L4; BCL2L4; BCL2L4; BCL2L4; BCL2L4
P07093	P07093			Glia-derived nexin	SERPINE2	GDN; Peptidase inhibitor 7; PI-7; Protease nexin 1; PN-1; Protease nexin I; Serpin E2; PI7,; PI7,; PI7,; PI7,; PI7,
P22626	P22626			Heterogeneous nuclear ribonucleoproteins A2/B1	HNRNPA2B1	hnRNP A2/B1; HNRPA2B1; HNRPA2B1; HNRPA2B1; HNRPA2B1; HNRPA2B1; HNRPA2B1; HNRPA2B1
Q16181	Q16181			Septin-7	SEPT7	CDC10 protein homolog; CDC10; CDC10; CDC10
P78371	P78371			T-complex protein 1 subunit beta	CCT2	TCP-1-beta; CCT-beta; 99D8.1,; 99D8.1,; 99D8.1,; 99D8.1,; 99D8.1,; 99D8.1,; 99D8.1,; 99D8.1,
P21359	P21359			Neurofibromin	NF1	Neurofibromatosis-related protein NF-1
Q15365	Q15365			Poly(rC)-binding protein 1	PCBP1	Alpha-CP1; Heterogeneous nuclear ribonucleoprotein E1; hnRNP E1; Nucleic acid-binding protein SUB2.3
P40926	P40926			Malate dehydrogenase, mitochondrial	MDH2
O60716	O60716			Catenin delta-1	CTNND1	Cadherin-associated Src substrate; CAS; p120 catenin; p120(ctn); p120(cas); KIAA0384; KIAA0384; KIAA0384; KIAA0384; KIAA0384; KIAA0384; KIAA0384; KIAA0384; KIAA0384; KIAA0384; KIAA0384; KIAA0384
Q96J84	Q96J84			Kin of IRRE-like protein 1	KIRREL	Kin of irregular chiasm-like protein 1; Nephrin-like protein 1; KIRREL1,; KIRREL1,; KIRREL1,; KIRREL1,; KIRREL1,; KIRREL1,; KIRREL1,; KIRREL1,
O00764	O00764			Pyridoxal kinase	PDXK	Pyridoxine kinase; C21orf124,; C21orf124,; C21orf124,
P49257	P49257			Protein ERGIC-53	LMAN1	ER-Golgi intermediate compartment 53 kDa protein; Gp58; Intracellular mannose-specific lectin MR60; Lectin mannose-binding 1; ERGIC53,; ERGIC53,; ERGIC53,; ERGIC53,; ERGIC53,; ERGIC53,; ERGIC53,; ERGIC53,; ERGIC53,; ERGIC53,; ERGIC53,; ERGIC53,; ERGIC53,; ERGIC53,; ERGIC53,
P35241	P35241			Radixin	RDX
Q9Y5Y2	Q9Y5Y2			Cytosolic Fe-S cluster assembly factor NUBP2 {ECO:0000255|HAMAP-Rule:MF_03039}	NUBP2	Nucleotide-binding protein 2 {ECO:0000255|HAMAP-Rule:MF_03039}; NBP 2 {ECO:0000255|HAMAP-Rule:MF_03039}
Q14160	Q14160			Protein scribble homolog	SCRIB	Scribble; hScrib; Protein LAP4; CRIB1,; CRIB1,; CRIB1,; CRIB1,; CRIB1,; CRIB1,
P09104	P09104			Gamma-enolase	ENO2	2-phospho-D-glycerate hydro-lyase; Enolase 2; Neural enolase; Neuron-specific enolase; NSE
P60033	P60033			CD81 antigen	CD81	26 kDa cell surface protein TAPA-1; Target of the antiproliferative antibody 1; Tetraspanin-28; Tspan-28; TAPA1,; TAPA1,; TAPA1,
Q13492	Q13492			Phosphatidylinositol-binding clathrin assembly protein	PICALM	Clathrin assembly lymphoid myeloid leukemia protein; CALM; CALM; CALM; CALM; CALM; CALM; CALM; CALM
P00441	P00441			Superoxide dismutase [Cu-Zn]	SOD1	Superoxide dismutase 1; hSod1
P51148	P51148			Ras-related protein Rab-5C	RAB5C	L1880; RAB5L; RABL; RABL; RABL; RABL
Q16543	Q16543			Hsp90 co-chaperone Cdc37	CDC37	Hsp90 chaperone protein kinase-targeting subunit; p50Cdc37; CDC37A; CDC37A
P62258	P62258			14-3-3 protein epsilon	YWHAE	14-3-3E
Q7Z699	Q7Z699			Sprouty-related, EVH1 domain-containing protein 1	SPRED1	Spred-1; hSpred1
P17174	P17174			Aspartate aminotransferase, cytoplasmic	GOT1	cAspAT; Cysteine aminotransferase, cytoplasmic; Cysteine transaminase, cytoplasmic; cCAT; Glutamate oxaloacetate transaminase 1; Transaminase A
P09874	P09874			Poly [ADP-ribose] polymerase 1	PARP1	PARP-1; ADP-ribosyltransferase diphtheria toxin-like 1; ARTD1; NAD(+) ADP-ribosyltransferase 1; ADPRT 1; Poly[ADP-ribose] synthase 1; ADPRT,; ADPRT,; ADPRT,
Q9UNM6	Q9UNM6			26S proteasome non-ATPase regulatory subunit 13	PSMD13	26S proteasome regulatory subunit RPN9; 26S proteasome regulatory subunit S11; 26S proteasome regulatory subunit p40.5
Q99832	Q99832			T-complex protein 1 subunit eta	CCT7	TCP-1-eta; CCT-eta; HIV-1 Nef-interacting protein; CCTH,; CCTH,; CCTH,; CCTH,; CCTH,; CCTH,; CCTH,; CCTH,
Q99460	Q99460			26S proteasome non-ATPase regulatory subunit 1	PSMD1	26S proteasome regulatory subunit RPN2; 26S proteasome regulatory subunit S1; 26S proteasome subunit p112
P16930	P16930			Fumarylacetoacetase	FAH	FAA; Beta-diketonase; Fumarylacetoacetate hydrolase
P28070	P28070			Proteasome subunit beta type-4	PSMB4	26 kDa prosomal protein; HsBPROS26; PROS-26; Macropain beta chain; Multicatalytic endopeptidase complex beta chain; Proteasome beta chain; Proteasome chain 3; HsN3; PROS26; PROS26; PROS26; PROS26; PROS26; PROS26
P61247	P61247			40S ribosomal protein S3a {ECO:0000255|HAMAP-Rule:MF_03122}	RPS3A	v-fos transformation effector protein; Fte-1; FTE1,; FTE1,; FTE1,; FTE1,; FTE1,
Q9Y5X1	Q9Y5X1			Sorting nexin-9	SNX9	SH3 and PX domain-containing protein 1; Protein SDP1; SH3 and PX domain-containing protein 3A; SH3PX1,; SH3PX1,; SH3PX1,; SH3PX1,; SH3PX1,
Q9HD67	Q9HD67			Unconventional myosin-X	MYO10	Unconventional myosin-10; KIAA0799; KIAA0799; KIAA0799; KIAA0799; KIAA0799; KIAA0799; KIAA0799; KIAA0799
P49591	P49591			Serine--tRNA ligase, cytoplasmic	SARS	Seryl-tRNA synthetase; SerRS; Seryl-tRNA(Ser/Sec) synthetase; SERS; SERS; SERS; SERS
Q9BTW9	Q9BTW9			Tubulin-specific chaperone D	TBCD	Beta-tubulin cofactor D; tfcD; SSD-1; Tubulin-folding cofactor D; KIAA0988,; KIAA0988,; KIAA0988,; KIAA0988,; KIAA0988,; KIAA0988,; KIAA0988,; KIAA0988,; KIAA0988,; KIAA0988,
Q02809	Q02809			Procollagen-lysine,2-oxoglutarate 5-dioxygenase 1	PLOD1	Lysyl hydroxylase 1; LH1; LLH,; LLH,; LLH,; LLH,
P22234	P22234			Name: Full=Phosphoribosylaminoimidazole carboxylase	PAICS	SAICAR synthetase; AIR carboxylase; AIRC; ADE2,; ADE2,; ADE2,
Q9Y6M7	Q9Y6M7			Sodium bicarbonate cotransporter 3	SLC4A7	Electroneutral Na/HCO(3) cotransporter; Sodium bicarbonate cotransporter 2; Sodium bicarbonate cotransporter 2b; Bicarbonate transporter; Solute carrier family 4 member 7; BT,; BT,; BT,; BT,; BT,; BT,; BT,; BT,; BT,; BT,; BT,; BT,; BT,; BT,; BT,; BT,
P16615	P16615			Sarcoplasmic/endoplasmic reticulum calcium ATPase 2	ATP2A2	SERCA2; SR Ca(2+)-ATPase 2; Calcium pump 2; Calcium-transporting ATPase sarcoplasmic reticulum type, slow twitch skeletal muscle isoform; Endoplasmic reticulum class 1/2 Ca(2+) ATPase; ATP2B; ATP2B; ATP2B; ATP2B; ATP2B
Q01518	Q01518			Adenylyl cyclase-associated protein 1	CAP1	CAP 1; CAP; CAP; CAP; CAP; CAP
P53985	P53985			Monocarboxylate transporter 1	SLC16A1	MCT 1; Solute carrier family 16 member 1; MCT1; MCT1; MCT1; MCT1
Q92973	Q92973			Transportin-1	TNPO1	Importin beta-2; Karyopherin beta-2; M9 region interaction protein; MIP; KPNB2,; KPNB2,; KPNB2,; KPNB2,
Q15334	Q15334			Lethal(2) giant larvae protein homolog 1	LLGL1	LLGL; DLG4; Hugl-1; Human homolog to the D-lgl gene protein; DLG4,; DLG4,; DLG4,; DLG4,; DLG4,
Q9UKG1	Q9UKG1			DCC-interacting protein 13-alpha	APPL1	Dip13-alpha; Adapter protein containing PH domain, PTB domain and leucine zipper motif 1; APPL; APPL; APPL; APPL
P48147	P48147			Prolyl endopeptidase	PREP	PE; Post-proline cleaving enzyme; PEP; PEP
Q12929	Q12929			Epidermal growth factor receptor kinase substrate 8	EPS8
Q06830	Q06830			Peroxiredoxin-1	PRDX1	Natural killer cell-enhancing factor A; NKEF-A; Proliferation-associated gene protein; PAG; Thioredoxin peroxidase 2; Thioredoxin-dependent peroxide reductase 2; PAGA,; PAGA,; PAGA,; PAGA,; PAGA,; PAGA,; PAGA,
P51149	P51149			Ras-related protein Rab-7a	RAB7A	RAB7; RAB7; RAB7; RAB7
P84095	P84095			Rho-related GTP-binding protein RhoG	RHOG	ARHG; ARHG; ARHG
Q13126	Q13126			S-methyl-5'-thioadenosine phosphorylase {ECO:0000255|HAMAP-Rule:MF_03155}	MTAP	5'-methylthioadenosine phosphorylase {ECO:0000255|HAMAP-Rule:MF_03155}; MTA phosphorylase {ECO:0000255|HAMAP-Rule:MF_03155}; MTAP {ECO:0000255|HAMAP-Rule:MF_03155}; MTAPase {ECO:0000255|HAMAP-Rule:MF_03155}; MSAP; MSAP; MSAP; MSAP; MSAP; MSAP; MSAP; MSAP; MSAP
Q9P0V3	Q9P0V3			SH3 domain-binding protein 4	SH3BP4	EH-binding protein 10; Transferrin receptor-trafficking protein; BOG25,; BOG25,; BOG25,; BOG25,; BOG25,
P11413	P11413			Glucose-6-phosphate 1-dehydrogenase	G6PD	G6PD
Q14764	Q14764			Major vault protein	MVP	MVP; Lung resistance-related protein; LRP; LRP; LRP; LRP; LRP
Q7L576	Q7L576			Cytoplasmic FMR1-interacting protein 1	CYFIP1	Specifically Rac1-associated protein 1; Sra-1; p140sra-1; KIAA0068; KIAA0068; KIAA0068; KIAA0068; KIAA0068; KIAA0068; KIAA0068
Q15437	Q15437			Protein transport protein Sec23B	SEC23B	SEC23-related protein B
Q04721	Q04721			Neurogenic locus notch homolog protein 2	NOTCH2	Notch 2; hN2
P55036	P55036			26S proteasome non-ATPase regulatory subunit 4	PSMD4	26S proteasome regulatory subunit RPN10; 26S proteasome regulatory subunit S5A; Antisecretory factor 1; AF; ASF; Multiubiquitin chain-binding protein; MCB1; MCB1; MCB1; MCB1
P60891	P60891			Ribose-phosphate pyrophosphokinase 1	PRPS1	PPRibP; Phosphoribosyl pyrophosphate synthase I; PRS-I
P29401	P29401			Transketolase	TKT	TK
O43813	O43813			LanC-like protein 1	LANCL1	40 kDa erythrocyte membrane protein; p40; GPR69A
P98196	P98196			Probable phospholipid-transporting ATPase IH	ATP11A	ATPase IS; ATPase class VI type 11A; P4-ATPase flippase complex alpha subunit ATP11A; ATPIH,; ATPIH,
P06756	P06756			Integrin alpha-V	ITGAV	Vitronectin receptor subunit alpha; MSK8,; MSK8,; MSK8,; MSK8,; MSK8,; MSK8,; MSK8,; MSK8,; MSK8,; MSK8,
O14672	O14672			Disintegrin and metalloproteinase domain-containing protein 10	ADAM10	ADAM 10; CDw156; Kuzbanian protein homolog; Mammalian disintegrin-metalloprotease; KUZ,; KUZ,; KUZ,; KUZ,
O43852	O43852			Calumenin	CALU	Crocalbin; IEF SSP 9302
Q08431	Q08431			Lactadherin	MFGE8	Breast epithelial antigen BA46; HMFG; MFGM; Milk fat globule-EGF factor 8; MFG-E8; SED1
Q9ULC4	Q9ULC4			Malignant T-cell-amplified sequence 1	MCTS1	MCT-1; Multiple copies T-cell malignancies; MCT1; MCT1; MCT1
P05198	P05198			Eukaryotic translation initiation factor 2 subunit 1	EIF2S1	Eukaryotic translation initiation factor 2 subunit alpha; eIF-2-alpha; eIF-2A; eIF-2alpha; EIF2A
Q16658	Q16658			Fascin	FSCN1	55 kDa actin-bundling protein; Singed-like protein; p55; FAN1,; FAN1,; FAN1,; FAN1,; FAN1,; FAN1,
Q92499	Q92499			ATP-dependent RNA helicase DDX1	DDX1	DEAD box protein 1; DEAD box protein retinoblastoma; DBP-RB
P98160	P98160			Basement membrane-specific heparan sulfate proteoglycan core protein	HSPG2	HSPG; Perlecan; PLC
P05026	P05026			Sodium/potassium-transporting ATPase subunit beta-1	ATP1B1	Sodium/potassium-dependent ATPase subunit beta-1; ATP1B; ATP1B
P07954	P07954			Fumarate hydratase, mitochondrial	FH	Fumarase
P05455	P05455			Lupus La protein	SSB	La autoantigen; La ribonucleoprotein; Sjoegren syndrome type B antigen; SS-B
O94887	O94887			FERM, RhoGEF and pleckstrin domain-containing protein 2	FARP2	FERM domain including RhoGEF; FIR; Pleckstrin homology domain-containing family C member 3; PH domain-containing family C member 3; KIAA0793,; KIAA0793,; KIAA0793,; KIAA0793,; KIAA0793,; KIAA0793,
Q96FN4	Q96FN4			Copine-2 {ECO:0000305}	CPNE2	Copine II {ECO:0000250|UniProtKB:Q99829, ECO:0000312|HGNC:HGNC:2315}
O15511	O15511			Actin-related protein 2/3 complex subunit 5	ARPC5	Arp2/3 complex 16 kDa subunit; p16-ARC; ARC16; ARC16; ARC16
P04271	P04271			Protein S100-B	S100B	S-100 protein beta chain; S-100 protein subunit beta; S100 calcium-binding protein B
Q02750	Q02750			Dual specificity mitogen-activated protein kinase kinase 1	MAP2K1	MAP kinase kinase 1; MAPKK 1; MKK1; ERK activator kinase 1; MAPK/ERK kinase 1; MEK 1; MEK1,
Q2M389	Q2M389			WASH complex subunit SWIP {ECO:0000305}	KIAA1033	Strumpellin and WASH-interacting protein {ECO:0000303|PubMed:21498477}; SWIP {ECO:0000303|PubMed:21498477}
P08195	P08195			4F2 cell-surface antigen heavy chain	SLC3A2	4F2hc; 4F2 heavy chain antigen; Lymphocyte activation antigen 4F2 large subunit; Solute carrier family 3 member 2; MDU1; MDU1
O43854	O43854			EGF-like repeat and discoidin I-like domain-containing protein 3	EDIL3	Developmentally-regulated endothelial cell locus 1 protein; Integrin-binding protein DEL1; DEL1; DEL1; DEL1; DEL1; DEL1
P43686	P43686			26S protease regulatory subunit 6B	PSMC4	26S proteasome AAA-ATPase subunit RPT3; MB67-interacting protein; MIP224; Proteasome 26S subunit ATPase 4; Tat-binding protein 7; TBP-7; MIP224,; MIP224,; MIP224,; MIP224,
Q00535	Q00535			Cyclin-dependent-like kinase 5	CDK5	Cell division protein kinase 5; Serine/threonine-protein kinase PSSALRE; Tau protein kinase II catalytic subunit; TPKII catalytic subunit; CDKN5; CDKN5
P48637	P48637			Glutathione synthetase	GSS	GSH synthetase; GSH-S; Glutathione synthase
P39023	P39023			60S ribosomal protein L3	RPL3	HIV-1 TAR RNA-binding protein B; TARBP-B
P57729	P57729			Ras-related protein Rab-38	RAB38	Melanoma antigen NY-MEL-1
P63208	P63208			S-phase kinase-associated protein 1	SKP1	Cyclin-A/CDK2-associated protein p19; p19A; Organ of Corti protein 2; OCP-2; Organ of Corti protein II; OCP-II; RNA polymerase II elongation factor-like protein; SIII; Transcription elongation factor B polypeptide 1-like; p19skp1; EMC19,; EMC19,; EMC19,; EMC19,; EMC19,
P63010	P63010			AP-2 complex subunit beta	AP2B1	AP105B; Adaptor protein complex AP-2 subunit beta; Adaptor-related protein complex 2 subunit beta; Beta-2-adaptin; Beta-adaptin; Clathrin assembly protein complex 2 beta large chain; Plasma membrane adaptor HA2/AP2 adaptin beta subunit; ADTB2,; ADTB2,; ADTB2,; ADTB2,; ADTB2,
P14866	P14866			Heterogeneous nuclear ribonucleoprotein L	HNRNPL	hnRNP L; HNRPL; HNRPL; HNRPL; HNRPL
P21589	P21589			5'-nucleotidase	NT5E	5'-NT; Ecto-5'-nucleotidase; NT5,; NT5,; NT5,; NT5,
Q9NRW7	Q9NRW7			Vacuolar protein sorting-associated protein 45	VPS45	h-VPS45; hlVps45; VPS45A,; VPS45A,; VPS45A,; VPS45A,; VPS45A,; VPS45A,; VPS45A,
Q9P2B2	Q9P2B2			Prostaglandin F2 receptor negative regulator	PTGFRN	CD9 partner 1; CD9P-1; Glu-Trp-Ile EWI motif-containing protein F; EWI-F; Prostaglandin F2-alpha receptor regulatory protein; Prostaglandin F2-alpha receptor-associated protein; CD9P1,; CD9P1,; CD9P1,
P63151	P63151			Serine/threonine-protein phosphatase 2A 55 kDa regulatory subunit B alpha isoform	PPP2R2A	PP2A subunit B isoform B55-alpha; PP2A subunit B isoform PR55-alpha; PP2A subunit B isoform R2-alpha; PP2A subunit B isoform alpha
P31323	P31323			cAMP-dependent protein kinase type II-beta regulatory subunit	PRKAR2B
Q9NR31	Q9NR31			GTP-binding protein SAR1a	SAR1A	COPII-associated small GTPase; SAR1,; SAR1,
P28074	P28074			Proteasome subunit beta type-5	PSMB5	Macropain epsilon chain; Multicatalytic endopeptidase complex epsilon chain; Proteasome chain 6; Proteasome epsilon chain; Proteasome subunit MB1; Proteasome subunit X; LMPX,; LMPX,; LMPX,; LMPX,; LMPX,; LMPX,; LMPX,; LMPX,; LMPX,; LMPX,
O94979	O94979			Protein transport protein Sec31A	SEC31A	ABP125; ABP130; SEC31-like protein 1; SEC31-related protein A; Web1-like protein; KIAA0905,; KIAA0905,; KIAA0905,; KIAA0905,; KIAA0905,; KIAA0905,; KIAA0905,; KIAA0905,; KIAA0905,; KIAA0905,; KIAA0905,; KIAA0905,; KIAA0905,; KIAA0905,; KIAA0905,; KIAA0905,; KIAA0905,
Q00610	Q00610			Clathrin heavy chain 1	CLTC	Clathrin heavy chain on chromosome 17; CLH-17; CLH17,; CLH17,; CLH17,; CLH17,
Q9UN86	Q9UN86			Ras GTPase-activating protein-binding protein 2	G3BP2	G3BP-2; GAP SH3 domain-binding protein 2; KIAA0660; KIAA0660; KIAA0660; KIAA0660; KIAA0660
P12956	P12956			X-ray repair cross-complementing protein 6	XRCC6	5'-deoxyribose-5-phosphate lyase Ku70; 5'-dRP lyase Ku70; 70 kDa subunit of Ku antigen; ATP-dependent DNA helicase 2 subunit 1; ATP-dependent DNA helicase II 70 kDa subunit; CTC box-binding factor 75 kDa subunit; CTC75; CTCBF; DNA repair protein XRCC6; Lupus Ku autoantigen protein p70; Ku70; Thyroid-lupus autoantigen; TLAA; X-ray repair complementing defective repair in Chinese hamster cells 6; G…
Q9BZQ8	Q9BZQ8			Protein Niban	FAM129A	Cell growth-inhibiting gene 39 protein; Protein FAM129A; C1orf24,; C1orf24,; C1orf24,; C1orf24,; C1orf24,; C1orf24,; C1orf24,
Q7KZF4	Q7KZF4			Staphylococcal nuclease domain-containing protein 1	SND1	100 kDa coactivator; EBNA2 coactivator p100; Tudor domain-containing protein 11; p100 co-activator; TDRD11; TDRD11; TDRD11
Q92783	Q92783			Signal transducing adapter molecule 1	STAM	STAM-1; STAM1; STAM1; STAM1; STAM1
Q06124	Q06124			Tyrosine-protein phosphatase non-receptor type 11	PTPN11	Protein-tyrosine phosphatase 1D; PTP-1D; Protein-tyrosine phosphatase 2C; PTP-2C; SH-PTP2; SHP-2; Shp2; SH-PTP3; PTP2C,; PTP2C,; PTP2C,
O75116	O75116			Rho-associated protein kinase 2	ROCK2	Rho kinase 2; Rho-associated, coiled-coil-containing protein kinase 2; Rho-associated, coiled-coil-containing protein kinase II; ROCK-II; p164 ROCK-2; KIAA0619; KIAA0619; KIAA0619; KIAA0619
O75874	O75874			Isocitrate dehydrogenase [NADP] cytoplasmic	IDH1	IDH; Cytosolic NADP-isocitrate dehydrogenase; IDP; NADP(+)-specific ICDH; Oxalosuccinate decarboxylase; PICD; PICD; PICD; PICD; PICD; PICD; PICD
O43175	O43175			D-3-phosphoglycerate dehydrogenase	PHGDH	3-PGDH; PGDH3; PGDH3; PGDH3; PGDH3
P36871	P36871			Phosphoglucomutase-1	PGM1	PGM 1; Glucose phosphomutase 1
P43034	P43034			Platelet-activating factor acetylhydrolase IB subunit alpha {ECO:0000255|HAMAP-Rule:MF_03141}	PAFAH1B1	Lissencephaly-1 protein {ECO:0000255|HAMAP-Rule:MF_03141}; LIS-1 {ECO:0000255|HAMAP-Rule:MF_03141}; PAF acetylhydrolase 45 kDa subunit {ECO:0000255|HAMAP-Rule:MF_03141}; PAF-AH 45 kDa subunit {ECO:0000255|HAMAP-Rule:MF_03141}; PAF-AH alpha {ECO:0000255|HAMAP-Rule:MF_03141}; PAFAH alpha {ECO:0000255|HAMAP-Rule:MF_03141}; LIS1; LIS1; LIS1; LIS1
P54709	P54709			Sodium/potassium-transporting ATPase subunit beta-3	ATP1B3	Sodium/potassium-dependent ATPase subunit beta-3; ATPB-3
Q8NE71	Q8NE71			ATP-binding cassette sub-family F member 1	ABCF1	ATP-binding cassette 50; TNF-alpha-stimulated ABC protein; ABC50; ABC50; ABC50; ABC50
P60174	P60174			Triosephosphate isomerase	TPI1	TIM; Triose-phosphate isomerase; TPI; TPI; TPI; TPI; TPI; TPI; TPI; TPI
Q16531	Q16531			DNA damage-binding protein 1	DDB1	DDB p127 subunit; DNA damage-binding protein a; DDBa; Damage-specific DNA-binding protein 1; HBV X-associated protein 1; XAP-1; UV-damaged DNA-binding factor; UV-damaged DNA-binding protein 1; UV-DDB 1; XPE-binding factor; XPE-BF; Xeroderma pigmentosum group E-complementing protein; XPCe; XAP1; XAP1; XAP1; XAP1; XAP1; XAP1; XAP1
P11172	P11172			Name: Full=Orotidine 5'-phosphate decarboxylase	UMPS	UMP synthase; OPRT; OPRTase; ODC; OMPdecase
Q9NY33	Q9NY33			Dipeptidyl peptidase 3	DPP3	Dipeptidyl aminopeptidase III; Dipeptidyl arylamidase III; Dipeptidyl peptidase III; DPP III; Enkephalinase B
Q9UNF1	Q9UNF1			Melanoma-associated antigen D2	MAGED2	11B6; Breast cancer-associated gene 1 protein; BCG-1; Hepatocellular carcinoma-associated protein JCL-1; MAGE-D2 antigen; BCG1; BCG1; BCG1; BCG1; BCG1; BCG1; BCG1; BCG1
Q8TF42	Q8TF42			Ubiquitin-associated and SH3 domain-containing protein B	UBASH3B	Cbl-interacting protein p70; Suppressor of T-cell receptor signaling 1; STS-1; T-cell ubiquitin ligand 2; TULA-2; Tyrosine-protein phosphatase STS1/TULA2; KIAA1959,; KIAA1959,; KIAA1959,; KIAA1959,; KIAA1959,; KIAA1959,
O95573	O95573			Long-chain-fatty-acid--CoA ligase 3	ACSL3	Long-chain acyl-CoA synthetase 3; LACS 3; ACS3,; ACS3,; ACS3,
P25705	P25705			ATP synthase subunit alpha, mitochondrial	ATP5A1	ATP5A,; ATP5A,; ATP5A,; ATP5A,; ATP5A,; ATP5A,; ATP5A,; ATP5A,; ATP5A,; ATP5A,
Q9UL25	Q9UL25			Ras-related protein Rab-21	RAB21	KIAA0118; KIAA0118; KIAA0118
P07947	P07947			Tyrosine-protein kinase Yes	YES1	Proto-oncogene c-Yes; p61-Yes; YES; YES; YES
P37802	P37802			Transgelin-2	TAGLN2	Epididymis tissue protein Li 7e; SM22-alpha homolog; KIAA0120; KIAA0120; KIAA0120; KIAA0120; KIAA0120; KIAA0120; KIAA0120
O00303	O00303			Eukaryotic translation initiation factor 3 subunit F {ECO:0000255|HAMAP-Rule:MF_03005}	EIF3F	eIF3f {ECO:0000255|HAMAP-Rule:MF_03005}; Deubiquitinating enzyme eIF3f; Eukaryotic translation initiation factor 3 subunit 5 {ECO:0000255|HAMAP-Rule:MF_03005}; eIF-3-epsilon {ECO:0000255|HAMAP-Rule:MF_03005}; eIF3 p47 {ECO:0000255|HAMAP-Rule:MF_03005}; EIF3S5; EIF3S5; EIF3S5; EIF3S5
Q9Y262	Q9Y262			Eukaryotic translation initiation factor 3 subunit L {ECO:0000255|HAMAP-Rule:MF_03011}	EIF3L	eIF3l {ECO:0000255|HAMAP-Rule:MF_03011}; Eukaryotic translation initiation factor 3 subunit 6-interacting protein {ECO:0000255|HAMAP-Rule:MF_03011}; Eukaryotic translation initiation factor 3 subunit E-interacting protein {ECO:0000255|HAMAP-Rule:MF_03011}; EIF3EIP; EIF3EIP; EIF3EIP; EIF3EIP; EIF3EIP; EIF3EIP; EIF3EIP; EIF3EIP; EIF3EIP; EIF3EIP; EIF3EIP; EIF3EIP; EIF3EIP; EIF3EIP; EIF3EIP; EIF3EIP…
Q9NV96	Q9NV96			Cell cycle control protein 50A	TMEM30A	P4-ATPase flippase complex beta subunit TMEM30A; Transmembrane protein 30A; C6orf67,; C6orf67,; C6orf67,; C6orf67,; C6orf67,; C6orf67,
Q96A65	Q96A65			Exocyst complex component 4	EXOC4	Exocyst complex component Sec8; KIAA1699,; KIAA1699,; KIAA1699,; KIAA1699,; KIAA1699,; KIAA1699,
P11021	P11021			78 kDa glucose-regulated protein	HSPA5	GRP-78; Endoplasmic reticulum lumenal Ca(2+)-binding protein grp78; Heat shock 70 kDa protein 5; Immunoglobulin heavy chain-binding protein; BiP; GRP78; GRP78; GRP78; GRP78; GRP78
Q99598	Q99598			Translin-associated protein X	TSNAX	Translin-associated factor X; TRAX; TRAX
Q8IWB7	Q8IWB7			WD repeat and FYVE domain-containing protein 1	WDFY1	FENS-1; Phosphoinositide-binding protein 1; WD40- and FYVE domain-containing protein 1; Zinc finger FYVE domain-containing protein 17; KIAA1435,; KIAA1435,; KIAA1435,; KIAA1435,
P08138	P08138			Tumor necrosis factor receptor superfamily member 16	NGFR	Gp80-LNGFR; Low affinity neurotrophin receptor p75NTR; Low-affinity nerve growth factor receptor; NGF receptor; p75 ICD; TNFRSF16; TNFRSF16; TNFRSF16
Q92598	Q92598			Heat shock protein 105 kDa	HSPH1	Antigen NY-CO-25; Heat shock 110 kDa protein; HSP105,; HSP105,; HSP105,; HSP105,; HSP105,; HSP105,; HSP105,
P46821	P46821			Microtubule-associated protein 1B	MAP1B	MAP-1B
Q9Y3F4	Q9Y3F4			Serine-threonine kinase receptor-associated protein	STRAP	MAP activator with WD repeats; UNR-interacting protein; WD-40 repeat protein PT-WD; MAWD,; MAWD,; MAWD,; MAWD,; MAWD,; MAWD,
P60981	P60981			Destrin	DSTN	Actin-depolymerizing factor; ADF; ACTDP,; ACTDP,; ACTDP,; ACTDP,; ACTDP,; ACTDP,
P31943	P31943			Heterogeneous nuclear ribonucleoprotein H	HNRNPH1	hnRNP H; HNRPH,; HNRPH,; HNRPH,; HNRPH,
Q04446	Q04446			1,4-alpha-glucan-branching enzyme	GBE1	Brancher enzyme; Glycogen-branching enzyme
P68032	P68032			Actin, alpha cardiac muscle 1	ACTC1	Alpha-cardiac actin; ACTC; ACTC
P10809	P10809			60 kDa heat shock protein, mitochondrial	HSPD1	60 kDa chaperonin; Chaperonin 60; CPN60; Heat shock protein 60; HSP-60; Hsp60; HuCHA60; Mitochondrial matrix protein P1; P60 lymphocyte protein; HSP60; HSP60; HSP60; HSP60; HSP60
P13693	P13693			Translationally-controlled tumor protein	TPT1	TCTP; Fortilin; Histamine-releasing factor; HRF; p23
P35080	P35080			Profilin-2	PFN2	Profilin II
P13667	P13667			Protein disulfide-isomerase A4	PDIA4	Endoplasmic reticulum resident protein 70; ER protein 70; ERp70; Endoplasmic reticulum resident protein 72; ER protein 72; ERp-72; ERp72; ERP70,; ERP70,; ERP70,
Q96CC6	Q96CC6			Inactive rhomboid protein 1	RHBDF1	iRhom1; Epidermal growth factor receptor-related protein; Rhomboid 5 homolog 1; Rhomboid family member 1; p100hRho; C16orf8,; C16orf8,; C16orf8,; C16orf8,; C16orf8,; C16orf8,
Q15121	Q15121			Astrocytic phosphoprotein PEA-15	PEA15	15 kDa phosphoprotein enriched in astrocytes; Phosphoprotein enriched in diabetes; PED
P18206	P18206			Vinculin	VCL	Metavinculin; MV
P38117	P38117			Electron transfer flavoprotein subunit beta {ECO:0000305}	ETFB	Beta-ETF {ECO:0000303|PubMed:8504797}
P17980	P17980			26S protease regulatory subunit 6A	PSMC3	26S proteasome AAA-ATPase subunit RPT5; Proteasome 26S subunit ATPase 3; Proteasome subunit P50; Tat-binding protein 1; TBP-1; TBP1; TBP1; TBP1; TBP1; TBP1; TBP1; TBP1; TBP1
Q96FZ7	Q96FZ7			Charged multivesicular body protein 6	CHMP6	Chromatin-modifying protein 6; Vacuolar protein sorting-associated protein 20; Vps20; hVps20; VPS20; VPS20; VPS20; VPS20
P61221	P61221			ATP-binding cassette sub-family E member 1	ABCE1	2'-5'-oligoadenylate-binding protein; HuHP68; RNase L inhibitor; Ribonuclease 4 inhibitor; RNS4I; RLI,; RLI,; RLI,; RLI,; RLI,; RLI,; RLI,; RLI,; RLI,; RLI,; RLI,; RLI,; RLI,; RLI,; RLI,; RLI,
P08133	P08133			Annexin A6	ANXA6	67 kDa calelectrin; Annexin VI; Annexin-6; Calphobindin-II; CPB-II; Chromobindin-20; Lipocortin VI; Protein III; p68; p70; ANX6; ANX6; ANX6; ANX6; ANX6
O00232	O00232			26S proteasome non-ATPase regulatory subunit 12	PSMD12	26S proteasome regulatory subunit RPN5; 26S proteasome regulatory subunit p55
O00154	O00154			Cytosolic acyl coenzyme A thioester hydrolase	ACOT7	Acyl-CoA thioesterase 7; Brain acyl-CoA hydrolase; BACH; CTE-IIa; CTE-II; Long chain acyl-CoA thioester hydrolase; BACH; BACH; BACH; BACH; BACH; BACH; BACH; BACH; BACH; BACH; BACH; BACH; BACH; BACH; BACH; BACH; BACH
P13612	P13612			Integrin alpha-4	ITGA4	CD49 antigen-like family member D; Integrin alpha-IV; VLA-4 subunit alpha; CD49D; CD49D; CD49D
P19174	P19174			1-phosphatidylinositol 4,5-bisphosphate phosphodiesterase gamma-1	PLCG1	PLC-148; Phosphoinositide phospholipase C-gamma-1; Phospholipase C-II; PLC-II; Phospholipase C-gamma-1; PLC-gamma-1; PLC1; PLC1; PLC1; PLC1; PLC1
P12931	P12931			Proto-oncogene tyrosine-protein kinase Src	SRC	Proto-oncogene c-Src; pp60c-src; p60-Src; SRC1; SRC1; SRC1; SRC1; SRC1
P55072	P55072			Transitional endoplasmic reticulum ATPase	VCP	TER ATPase; 15S Mg(2+)-ATPase p97 subunit; Valosin-containing protein; VCP
Q92743	Q92743			Serine protease HTRA1	HTRA1	High-temperature requirement A serine peptidase 1; L56; Serine protease 11; HTRA,; HTRA,; HTRA,
P20339	P20339			Ras-related protein Rab-5A	RAB5A	RAB5; RAB5; RAB5
Q99829	Q99829			Copine-1 {ECO:0000305}	CPNE1	Chromobindin 17 {ECO:0000303|PubMed:9430674}; Copine I {ECO:0000303|PubMed:9430674, ECO:0000312|HGNC:HGNC:2314}; CPN1; CPN1; CPN1; CPN1; CPN1
Q9NYU2	Q9NYU2			UDP-glucose:glycoprotein glucosyltransferase 1	UGGT1	UGT1; hUGT1; UDP--Glc:glycoprotein glucosyltransferase; UDP-glucose ceramide glucosyltransferase-like 1; GT,; GT,; GT,; GT,; GT,; GT,; GT,; GT,; GT,; GT,
P31949	P31949			Protein S100-A11	S100A11	Calgizzarin; Metastatic lymph node gene 70 protein; MLN 70; Protein S100-C; S100 calcium-binding protein A11; MLN70,; MLN70,
Q96RT1	Q96RT1			Erbin {ECO:0000303|PubMed:10878805}	ERBIN	Densin-180-like protein; Erbb2-interacting protein {ECO:0000303|PubMed:10878805}; Protein LAP2; ERBB2IP; ERBB2IP; ERBB2IP; ERBB2IP; ERBB2IP; ERBB2IP; ERBB2IP; ERBB2IP; ERBB2IP; ERBB2IP; ERBB2IP; ERBB2IP; ERBB2IP; ERBB2IP; ERBB2IP; ERBB2IP; ERBB2IP; ERBB2IP; ERBB2IP; ERBB2IP; ERBB2IP; ERBB2IP
Q9Y285	Q9Y285			Phenylalanine--tRNA ligase alpha subunit	FARSA	CML33; Phenylalanyl-tRNA synthetase alpha subunit; PheRS; FARS,; FARS,; FARS,; FARS,
P61764	P61764			Syntaxin-binding protein 1	STXBP1	MUNC18-1; N-Sec1; Protein unc-18 homolog 1; Unc18-1; Protein unc-18 homolog A; Unc-18A; p67; UNC18A; UNC18A; UNC18A; UNC18A; UNC18A; UNC18A
P13473	P13473			Lysosome-associated membrane glycoprotein 2	LAMP2	LAMP-2; Lysosome-associated membrane protein 2; CD107 antigen-like family member B; LGP-96 {ECO:0000303|PubMed:8662539}
P29218	P29218			Inositol monophosphatase 1	IMPA1	IMP 1; IMPase 1; D-galactose 1-phosphate phosphatase {ECO:0000303|PubMed:9462881}; Inositol-1(or 4)-monophosphatase 1; Lithium-sensitive myo-inositol monophosphatase A1; IMPA; IMPA; IMPA; IMPA; IMPA; IMPA
Q9UHD1	Q9UHD1			Cysteine and histidine-rich domain-containing protein 1	CHORDC1	CHORD domain-containing protein 1; CHORD-containing protein 1; CHP-1; Protein morgana; CHP1; CHP1; CHP1; CHP1; CHP1
P08648	P08648			Integrin alpha-5	ITGA5	CD49 antigen-like family member E; Fibronectin receptor subunit alpha; Integrin alpha-F; VLA-5; FNRA; FNRA
P62136	P62136			Serine/threonine-protein phosphatase PP1-alpha catalytic subunit	PPP1CA	PP-1A; PPP1A; PPP1A; PPP1A; PPP1A; PPP1A; PPP1A; PPP1A
Q99497	Q99497			Protein deglycase DJ-1 {ECO:0000303|PubMed:25416785}	PARK7	DJ-1; Oncogene DJ1; Parkinson disease protein 7
P16152	P16152			Carbonyl reductase [NADPH] 1	CBR1	15-hydroxyprostaglandin dehydrogenase [NADP(+)]; NADPH-dependent carbonyl reductase 1; Prostaglandin 9-ketoreductase; Prostaglandin-E(2) 9-reductase; Short chain dehydrogenase/reductase family 21C member 1; CBR,; CBR,; CBR,; CBR,
Q9UQ80	Q9UQ80			Proliferation-associated protein 2G4	PA2G4	Cell cycle protein p38-2G4 homolog; hG4-1; ErbB3-binding protein 1; EBP1; EBP1; EBP1
Q8WUM4	Q8WUM4			Programmed cell death 6-interacting protein	PDCD6IP	PDCD6-interacting protein; ALG-2-interacting protein 1; ALG-2-interacting protein X; Hp95; AIP1,; AIP1,; AIP1,; AIP1,; AIP1,; AIP1,; AIP1,; AIP1,
Q13404	Q13404			Ubiquitin-conjugating enzyme E2 variant 1	UBE2V1	UEV-1; CROC-1; TRAF6-regulated IKK activator 1 beta Uev1A; CROC1,; CROC1,; CROC1,; CROC1,; CROC1,; CROC1,; CROC1,; CROC1,; CROC1,; CROC1,; CROC1,; CROC1,; CROC1,; CROC1,; CROC1,
O75695	O75695			Protein XRP2	RP2
Q03154	Q03154			Aminoacylase-1	ACY1	ACY-1; N-acyl-L-amino-acid amidohydrolase
Q01433	Q01433			AMP deaminase 2	AMPD2	AMP deaminase isoform L
P08069	P08069			Insulin-like growth factor 1 receptor	IGF1R	Insulin-like growth factor I receptor; IGF-I receptor
P56192	P56192			Methionine--tRNA ligase, cytoplasmic	MARS	Methionyl-tRNA synthetase; MetRS
Q14974	Q14974			Importin subunit beta-1	KPNB1	Importin-90; Karyopherin subunit beta-1; Nuclear factor p97; Pore targeting complex 97 kDa subunit; PTAC97; NTF97; NTF97; NTF97; NTF97; NTF97; NTF97
P04792	P04792			Heat shock protein beta-1	HSPB1	HspB1; 28 kDa heat shock protein; Estrogen-regulated 24 kDa protein; Heat shock 27 kDa protein; HSP 27; Stress-responsive protein 27; SRP27; HSP27,; HSP27,; HSP27,; HSP27,; HSP27,; HSP27,; HSP27,; HSP27,; HSP27,
P13762	P13762			HLA class II histocompatibility antigen, DR beta 4 chain	HLA-DRB4	MHC class II antigen DRB4
Q6DD88	Q6DD88			Atlastin-3	ATL3
P55060	P55060			Exportin-2	CSE1L	Exp2; Cellular apoptosis susceptibility protein; Chromosome segregation 1-like protein; Importin-alpha re-exporter; CAS,; CAS,; CAS,; CAS,; CAS,; CAS,; CAS,; CAS,; CAS,; CAS,; CAS,; CAS,
P60903	P60903			Protein S100-A10	S100A10	Calpactin I light chain; Calpactin-1 light chain; Cellular ligand of annexin II; S100 calcium-binding protein A10; p10 protein; p11; ANX2LG,; ANX2LG,; ANX2LG,; ANX2LG,
P51114	P51114			Fragile X mental retardation syndrome-related protein 1	FXR1	hFXR1p
P14923	P14923			Junction plakoglobin	JUP	Catenin gamma; Desmoplakin III; Desmoplakin-3; CTNNG,; CTNNG,; CTNNG,; CTNNG,; CTNNG,; CTNNG,; CTNNG,
P31153	P31153			S-adenosylmethionine synthase isoform type-2	MAT2A	AdoMet synthase 2; Methionine adenosyltransferase 2; MAT 2 {ECO:0000303|PubMed:10644686}; Methionine adenosyltransferase II; MAT-II; AMS2,; AMS2,; AMS2,; AMS2,; AMS2,
P18124	P18124			60S ribosomal protein L7	RPL7
Q96FW1	Q96FW1			Ubiquitin thioesterase OTUB1	OTUB1	Deubiquitinating enzyme OTUB1; OTU domain-containing ubiquitin aldehyde-binding protein 1; Otubain-1; hOTU1; Ubiquitin-specific-processing protease OTUB1; OTB1,; OTB1,; OTB1,; OTB1,; OTB1,
P08107	P08107			Heat shock 70 kDa protein 1B {ECO:0000312|HGNC:HGNC:5233}	HSPA1B	Heat shock 70 kDa protein 2; HSP70-2 {ECO:0000303|PubMed:14656967, ECO:0000303|PubMed:2538825}; HSP70.2
P15531	P15531			Nucleoside diphosphate kinase A	NME1	NDK A; NDP kinase A; Granzyme A-activated DNase; GAAD; Metastasis inhibition factor nm23; NM23-H1; Tumor metastatic process-associated protein; NDPKA,; NDPKA,; NDPKA,; NDPKA,
Q9NSD9	Q9NSD9			Phenylalanine--tRNA ligase beta subunit	FARSB	Phenylalanyl-tRNA synthetase beta subunit; PheRS; FARSLB,; FARSLB,; FARSLB,; FARSLB,; FARSLB,; FARSLB,
Q8N474	Q8N474			Secreted frizzled-related protein 1	SFRP1	FRP-1; sFRP-1; Secreted apoptosis-related protein 2; SARP-2; FRP,; FRP,; FRP,
P36578	P36578			60S ribosomal protein L4	RPL4	60S ribosomal protein L1; RPL1; RPL1; RPL1; RPL1; RPL1
Q9Y6M5	Q9Y6M5			Zinc transporter 1	SLC30A1	ZnT-1; Solute carrier family 30 member 1; ZNT1; ZNT1; ZNT1
Q96PY5	Q96PY5			Formin-like protein 2	FMNL2	Formin homology 2 domain-containing protein 2; FHOD2,; FHOD2,; FHOD2,; FHOD2,; FHOD2,
Q15046	Q15046			Lysine--tRNA ligase	KARS	Lysyl-tRNA synthetase; LysRS; KIAA0070; KIAA0070; KIAA0070; KIAA0070; KIAA0070; KIAA0070
P25787	P25787			Proteasome subunit alpha type-2	PSMA2	Macropain subunit C3; Multicatalytic endopeptidase complex subunit C3; Proteasome component C3; HC3,; HC3,; HC3,
Q9UBB4	Q9UBB4			Ataxin-10	ATXN10	Brain protein E46 homolog; Spinocerebellar ataxia type 10 protein; SCA10; SCA10; SCA10; SCA10; SCA10; SCA10
O95302	O95302			Peptidyl-prolyl cis-trans isomerase FKBP9	FKBP9	PPIase FKBP9; 63 kDa FK506-binding protein; 63 kDa FKBP; FKBP-63; FK506-binding protein 9; FKBP-9; Rotamase; FKBP60,; FKBP60,; FKBP60,; FKBP60,; FKBP60,; FKBP60,; FKBP60,; FKBP60,; FKBP60,; FKBP60,
P35527	P35527			Keratin, type I cytoskeletal 9	KRT9	Cytokeratin-9; CK-9; Keratin-9; K9
Q15008	Q15008			26S proteasome non-ATPase regulatory subunit 6	PSMD6	26S proteasome regulatory subunit RPN7; 26S proteasome regulatory subunit S10; Breast cancer-associated protein SGA-113M; Phosphonoformate immuno-associated protein 4; Proteasome regulatory particle subunit p44S10; p42A; KIAA0107,; KIAA0107,; KIAA0107,; KIAA0107,
P36543	P36543			V-type proton ATPase subunit E 1	ATP6V1E1	V-ATPase subunit E 1; V-ATPase 31 kDa subunit; p31; Vacuolar proton pump subunit E 1; ATP6E,; ATP6E,; ATP6E,
P63241	P63241			Eukaryotic translation initiation factor 5A-1	EIF5A	eIF-5A-1; eIF-5A1; Eukaryotic initiation factor 5A isoform 1; eIF-5A; Rev-binding factor; eIF-4D
Q96JJ7	Q96JJ7			Protein disulfide-isomerase TMX3	TMX3	Thioredoxin domain-containing protein 10; Thioredoxin-related transmembrane protein 3; KIAA1830,; KIAA1830,; KIAA1830,; KIAA1830,; KIAA1830,
P61586	P61586			Transforming protein RhoA	RHOA	Rho cDNA clone 12; h12; ARH12,; ARH12,; ARH12,; ARH12,; ARH12,; ARH12,
P22392	P22392			Nucleoside diphosphate kinase B	NME2	NDK B; NDP kinase B; C-myc purine-binding transcription factor PUF; Histidine protein kinase NDKB; nm23-H2; NM23B; NM23B; NM23B; NM23B
Q8NBS9	Q8NBS9			Thioredoxin domain-containing protein 5	TXNDC5	Endoplasmic reticulum resident protein 46; ER protein 46; ERp46; Thioredoxin-like protein p46; TLP46; TLP46; TLP46; TLP46; TLP46; TLP46
P63096	P63096			Guanine nucleotide-binding protein G(i) subunit alpha-1	GNAI1	Adenylate cyclase-inhibiting G alpha protein
Q12959	Q12959			Disks large homolog 1	DLG1	Synapse-associated protein 97; SAP-97; SAP97; hDlg
Q04323	Q04323			UBX domain-containing protein 1	UBXN1	SAPK substrate protein 1; UBA/UBX 33.3 kDa protein; SAKS1; SAKS1; SAKS1
Q9Y376	Q9Y376			Calcium-binding protein 39	CAB39	MO25alpha; Protein Mo25; MO25; MO25
Q9Y3I0	Q9Y3I0			tRNA-splicing ligase RtcB homolog {ECO:0000255|HAMAP-Rule:MF_03144}	RTCB	C22orf28; C22orf28; C22orf28; C22orf28; C22orf28; C22orf28; C22orf28; C22orf28; C22orf28; C22orf28; C22orf28; C22orf28; C22orf28; C22orf28
Q8IZP0	Q8IZP0			Abl interactor 1	ABI1	Abelson interactor 1; Abi-1; Abl-binding protein 4; AblBP4; Eps8 SH3 domain-binding protein; Eps8-binding protein; Nap1-binding protein; Nap1BP; Spectrin SH3 domain-binding protein 1; e3B1; SSH3BP1; SSH3BP1; SSH3BP1; SSH3BP1; SSH3BP1; SSH3BP1; SSH3BP1; SSH3BP1; SSH3BP1; SSH3BP1; SSH3BP1; SSH3BP1; SSH3BP1; SSH3BP1; SSH3BP1; SSH3BP1; SSH3BP1; SSH3BP1; SSH3BP1
P17301	P17301			Integrin alpha-2	ITGA2	CD49 antigen-like family member B; Collagen receptor; Platelet membrane glycoprotein Ia; GPIa; VLA-2 subunit alpha; CD49B; CD49B
O15371	O15371			Eukaryotic translation initiation factor 3 subunit D {ECO:0000255|HAMAP-Rule:MF_03003}	EIF3D	eIF3d {ECO:0000255|HAMAP-Rule:MF_03003}; Eukaryotic translation initiation factor 3 subunit 7 {ECO:0000255|HAMAP-Rule:MF_03003}; eIF-3-zeta {ECO:0000255|HAMAP-Rule:MF_03003}; eIF3 p66; EIF3S7; EIF3S7; EIF3S7; EIF3S7; EIF3S7; EIF3S7; EIF3S7
O94832	O94832			Unconventional myosin-Id	MYO1D	KIAA0727; KIAA0727; KIAA0727
O43592	O43592			Exportin-T	XPOT	Exportin(tRNA); tRNA exportin
P26599	P26599			Polypyrimidine tract-binding protein 1	PTBP1	PTB; 57 kDa RNA-binding protein PPTB-1; Heterogeneous nuclear ribonucleoprotein I; hnRNP I; PTB; PTB
P24534	P24534			Elongation factor 1-beta	EEF1B2	EF-1-beta; EEF1B,; EEF1B,; EEF1B,
P68104	P68104			Elongation factor 1-alpha 1	EEF1A1	EF-1-alpha-1; Elongation factor Tu; EF-Tu; Eukaryotic elongation factor 1 A-1; eEF1A-1; Leukocyte receptor cluster member 7; EEF1A,; EEF1A,; EEF1A,; EEF1A,
Q86UX2	Q86UX2			Inter-alpha-trypsin inhibitor heavy chain H5	ITIH5	ITI heavy chain H5; ITI-HC5; Inter-alpha-inhibitor heavy chain 5; KIAA1953; KIAA1953; KIAA1953; KIAA1953; KIAA1953; KIAA1953; KIAA1953; KIAA1953; KIAA1953
P35237	P35237			Serpin B6	SERPINB6	Cytoplasmic antiproteinase; CAP; Peptidase inhibitor 6; PI-6; Placental thrombin inhibitor; PI6,; PI6,; PI6,; PI6,; PI6,; PI6,; PI6,
O95819	O95819			Mitogen-activated protein kinase kinase kinase kinase 4	MAP4K4	HPK/GCK-like kinase HGK; MAPK/ERK kinase kinase kinase 4; MEK kinase kinase 4; MEKKK 4; Nck-interacting kinase; HGK,; HGK,; HGK,
Q9NQW6	Q9NQW6			Anillin	ANLN
P26641	P26641			Elongation factor 1-gamma	EEF1G	EF-1-gamma; eEF-1B gamma; EF1G; EF1G; EF1G; EF1G; EF1G; EF1G
Q9UBQ5	Q9UBQ5			Eukaryotic translation initiation factor 3 subunit K {ECO:0000255|HAMAP-Rule:MF_03010}	EIF3K	eIF3k {ECO:0000255|HAMAP-Rule:MF_03010}; Eukaryotic translation initiation factor 3 subunit 12 {ECO:0000255|HAMAP-Rule:MF_03010}; Muscle-specific gene M9 protein; PLAC-24; eIF-3 p25 {ECO:0000255|HAMAP-Rule:MF_03010}; eIF-3 p28; EIF3S12; EIF3S12; EIF3S12; EIF3S12; EIF3S12; EIF3S12; EIF3S12; EIF3S12; EIF3S12; EIF3S12
Q14103	Q14103			Heterogeneous nuclear ribonucleoprotein D0	HNRNPD	hnRNP D0; AU-rich element RNA-binding protein 1; AUF1,; AUF1,; AUF1,; AUF1,; AUF1,; AUF1,; AUF1,; AUF1,; AUF1,; AUF1,
P42356	P42356			Phosphatidylinositol 4-kinase alpha	PI4KA	PI4-kinase alpha; PI4K-alpha; PtdIns-4-kinase alpha; PIK4,; PIK4,; PIK4,
P62841	P62841			40S ribosomal protein S15	RPS15	RIG protein; RIG; RIG; RIG; RIG; RIG
P12004	P12004			Proliferating cell nuclear antigen	PCNA	PCNA; Cyclin
Q9ULV4	Q9ULV4			Coronin-1C	CORO1C	Coronin-3; hCRNN4; CRN2,; CRN2,; CRN2,; CRN2,; CRN2,
P50991	P50991			T-complex protein 1 subunit delta	CCT4	TCP-1-delta; CCT-delta; Stimulator of TAR RNA-binding; CCTD,; CCTD,; CCTD,; CCTD,; CCTD,; CCTD,; CCTD,
P62081	P62081			40S ribosomal protein S7	RPS7
P23396	P23396			40S ribosomal protein S3	RPS3
Q96BY6	Q96BY6			Dedicator of cytokinesis protein 10	DOCK10	Zizimin-3; KIAA0694,; KIAA0694,; KIAA0694,; KIAA0694,; KIAA0694,
P10301	P10301			Ras-related protein R-Ras	RRAS	p23
Q9P258	Q9P258			Protein RCC2	RCC2	RCC1-like protein TD-60; Telophase disk protein of 60 kDa; KIAA1470,; KIAA1470,; KIAA1470,; KIAA1470,
O43143	O43143			Pre-mRNA-splicing factor ATP-dependent RNA helicase DHX15	DHX15	ATP-dependent RNA helicase #46; DEAH box protein 15; DBP1,; DBP1,
Q9H3U1	Q9H3U1			Protein unc-45 homolog A	UNC45A	Unc-45A; GCUNC-45; Smooth muscle cell-associated protein 1; SMAP-1; SMAP1; SMAP1; SMAP1; SMAP1; SMAP1; SMAP1
Q96KP4	Q96KP4			Cytosolic non-specific dipeptidase	CNDP2	CNDP dipeptidase 2; Carnosine dipeptidase II {ECO:0000303|PubMed:25964343}; Epididymis secretory protein Li 13 {ECO:0000312|EMBL:ACJ13654.1}; Glutamate carboxypeptidase-like protein 1; Peptidase A; CN2,; CN2,; CN2,; CN2,; CN2,; CN2,
P52294	P52294			Importin subunit alpha-5	KPNA1	Karyopherin subunit alpha-1; Nucleoprotein interactor 1; NPI-1; RAG cohort protein 2; SRP1-beta; RCH2; RCH2; RCH2; RCH2
P49588	P49588			Alanine--tRNA ligase, cytoplasmic {ECO:0000255|HAMAP-Rule:MF_03133}	AARS	Alanyl-tRNA synthetase {ECO:0000255|HAMAP-Rule:MF_03133}; AlaRS {ECO:0000255|HAMAP-Rule:MF_03133}; Renal carcinoma antigen NY-REN-42
P11586	P11586			Name: Full=Formyltetrahydrofolate synthetase	MTHFD1	C1-THF synthase; MTHFC,; MTHFC,; MTHFC,; MTHFC,; MTHFC,
O95425	O95425			Supervillin {ECO:0000303|PubMed:9867483}	SVIL	Archvillin {ECO:0000303|PubMed:12711699}; p205/p250 {ECO:0000303|PubMed:12711699, ECO:0000303|PubMed:9867483}
P32119	P32119			Peroxiredoxin-2	PRDX2	Natural killer cell-enhancing factor B; NKEF-B; PRP; Thiol-specific antioxidant protein; TSA; Thioredoxin peroxidase 1; Thioredoxin-dependent peroxide reductase 1; NKEFB,; NKEFB,; NKEFB,; NKEFB,; NKEFB,; NKEFB,; NKEFB,; NKEFB,
Q8TEX9	Q8TEX9			Importin-4	IPO4	Imp4; Importin-4b; Imp4b; Ran-binding protein 4; RanBP4; IMP4B,; IMP4B,; IMP4B,; IMP4B,; IMP4B,; IMP4B,; IMP4B,; IMP4B,
Q9Y4L1	Q9Y4L1			Hypoxia up-regulated protein 1	HYOU1	150 kDa oxygen-regulated protein; ORP-150; 170 kDa glucose-regulated protein; GRP-170; GRP170,; GRP170,; GRP170,; GRP170,; GRP170,
P45880	P45880			Voltage-dependent anion-selective channel protein 2	VDAC2	VDAC-2; hVDAC2; Outer mitochondrial membrane protein porin 2
Q14152	Q14152			Eukaryotic translation initiation factor 3 subunit A {ECO:0000255|HAMAP-Rule:MF_03000}	EIF3A	eIF3a {ECO:0000255|HAMAP-Rule:MF_03000}; Eukaryotic translation initiation factor 3 subunit 10 {ECO:0000255|HAMAP-Rule:MF_03000}; eIF-3-theta {ECO:0000255|HAMAP-Rule:MF_03000}; eIF3 p167; eIF3 p180; eIF3 p185; EIF3S10; EIF3S10; EIF3S10; EIF3S10; EIF3S10; EIF3S10
P13987	P13987			CD59 glycoprotein	CD59	1F5 antigen; 20 kDa homologous restriction factor; HRF-20; HRF20; MAC-inhibitory protein; MAC-IP; MEM43 antigen; Membrane attack complex inhibition factor; MACIF; Membrane inhibitor of reactive lysis; MIRL; Protectin; MIC11,
Q12846	Q12846			Syntaxin-4	STX4	Renal carcinoma antigen NY-REN-31; STX4A; STX4A; STX4A; STX4A
P00387	P00387			NADH-cytochrome b5 reductase 3	CYB5R3	B5R; Cytochrome b5 reductase; Diaphorase-1; DIA1; DIA1; DIA1; DIA1; DIA1; DIA1; DIA1; DIA1; DIA1; DIA1
P62701	P62701			40S ribosomal protein S4, X isoform	RPS4X	SCR10; Single copy abundant mRNA protein; CCG2,; CCG2,; CCG2,; CCG2,; CCG2,; CCG2,; CCG2,
P13804	P13804			Electron transfer flavoprotein subunit alpha, mitochondrial	ETFA	Alpha-ETF
Q96JB6	Q96JB6			Lysyl oxidase homolog 4	LOXL4	Lysyl oxidase-like protein 4; Lysyl oxidase-related protein C; LOXC; LOXC; LOXC; LOXC; LOXC
P61020	P61020			Ras-related protein Rab-5B	RAB5B
P22102	P22102			Name: Full=Phosphoribosylglycinamide formyltransferase	GART	Glycinamide ribonucleotide synthetase; GARS; Phosphoribosylglycinamide synthetase; AIR synthase; AIRS; Phosphoribosyl-aminoimidazole synthetase; 5'-phosphoribosylglycinamide transformylase; GAR transformylase; GART; PGFT,; PGFT,; PGFT,; PGFT,; PGFT,; PGFT,; PGFT,
P63261	P63261			Actin, cytoplasmic 2	ACTG1	Gamma-actin; ACTG; ACTG; ACTG; ACTG; ACTG; ACTG; ACTG
Q09666	Q09666			Neuroblast differentiation-associated protein AHNAK	AHNAK	Desmoyokin; PM227; PM227
Q86UX7	Q86UX7			Fermitin family homolog 3	FERMT3	Kindlin-3; MIG2-like protein; Unc-112-related protein 2; KIND3,; KIND3,; KIND3,; KIND3,
P07339	P07339			Cathepsin D	CTSD	CPSD; CPSD
P47712	P47712			Name: Full=Lysophospholipase	PLA2G4A	cPLA2; Phospholipase A2 group IVA; Phosphatidylcholine 2-acylhydrolase; CPLA2,; CPLA2,; CPLA2,
P17655	P17655			Calpain-2 catalytic subunit	CAPN2	Calcium-activated neutral proteinase 2; CANP 2; Calpain M-type; Calpain large polypeptide L2; Calpain-2 large subunit; Millimolar-calpain; M-calpain; CANPL2; CANPL2; CANPL2; CANPL2; CANPL2; CANPL2; CANPL2; CANPL2
Q96AY3	Q96AY3			Peptidyl-prolyl cis-trans isomerase FKBP10	FKBP10	PPIase FKBP10; 65 kDa FK506-binding protein; 65 kDa FKBP; FKBP-65; FK506-binding protein 10; FKBP-10; Immunophilin FKBP65; Rotamase; FKBP65; FKBP65; FKBP65; FKBP65; FKBP65; FKBP65
Q9Y2A7	Q9Y2A7			Nck-associated protein 1	NCKAP1	NAP 1; Membrane-associated protein HEM-2; p125Nap1; HEM2,; HEM2,; HEM2,; HEM2,; HEM2,
P09417	P09417			Dihydropteridine reductase	QDPR	HDHPR; Quinoid dihydropteridine reductase; Short chain dehydrogenase/reductase family 33C member 1; DHPR,; DHPR,; DHPR,; DHPR,; DHPR,
P54760	P54760			Ephrin type-B receptor 4	EPHB4	Hepatoma transmembrane kinase; Tyrosine-protein kinase TYRO11; HTK,; HTK,; HTK,; HTK,; HTK,; HTK,; HTK,
Q7L2H7	Q7L2H7			Eukaryotic translation initiation factor 3 subunit M {ECO:0000255|HAMAP-Rule:MF_03012}	EIF3M	eIF3m {ECO:0000255|HAMAP-Rule:MF_03012}; Fetal lung protein B5; hFL-B5; PCI domain-containing protein 1; HFLB5,; HFLB5,; HFLB5,; HFLB5,; HFLB5,; HFLB5,; HFLB5,; HFLB5,; HFLB5,; HFLB5,; HFLB5,; HFLB5,; HFLB5,; HFLB5,
Q99613	Q99613			Eukaryotic translation initiation factor 3 subunit C {ECO:0000255|HAMAP-Rule:MF_03002}	EIF3C	eIF3c {ECO:0000255|HAMAP-Rule:MF_03002}; Eukaryotic translation initiation factor 3 subunit 8 {ECO:0000255|HAMAP-Rule:MF_03002}; eIF3 p110 {ECO:0000255|HAMAP-Rule:MF_03002}; EIF3S8; EIF3S8; EIF3S8; EIF3S8; EIF3S8; EIF3S8; EIF3S8
Q13177	Q13177			Serine/threonine-protein kinase PAK 2	PAK2	Gamma-PAK; PAK65; S6/H4 kinase; p21-activated kinase 2; PAK-2; p58
Q14240	Q14240			Eukaryotic initiation factor 4A-II	EIF4A2	eIF-4A-II; eIF4A-II; ATP-dependent RNA helicase eIF4A-2; DDX2B,; DDX2B,; DDX2B,; DDX2B,; DDX2B,
Q14444	Q14444			Caprin-1	CAPRIN1	Cell cycle-associated protein 1; Cytoplasmic activation- and proliferation-associated protein 1; GPI-anchored membrane protein 1; GPI-anchored protein p137; GPI-p137; p137GPI; Membrane component chromosome 11 surface marker 1; RNA granule protein 105; GPIAP1,; GPIAP1,; GPIAP1,; GPIAP1,; GPIAP1,; GPIAP1,; GPIAP1,
O15498	O15498			Synaptobrevin homolog YKT6	YKT6
P00558	P00558			Phosphoglycerate kinase 1	PGK1	Cell migration-inducing gene 10 protein; Primer recognition protein 2; PRP 2; PGKA; PGKA; PGKA; PGKA; PGKA; PGKA
Q13347	Q13347			Eukaryotic translation initiation factor 3 subunit I {ECO:0000255|HAMAP-Rule:MF_03008}	EIF3I	eIF3i {ECO:0000255|HAMAP-Rule:MF_03008}; Eukaryotic translation initiation factor 3 subunit 2 {ECO:0000255|HAMAP-Rule:MF_03008}; TGF-beta receptor-interacting protein 1; TRIP-1; eIF-3-beta {ECO:0000255|HAMAP-Rule:MF_03008}; eIF3 p36 {ECO:0000255|HAMAP-Rule:MF_03008}; EIF3S2
Q13136	Q13136			Liprin-alpha-1	PPFIA1	LAR-interacting protein 1; LIP-1; Protein tyrosine phosphatase receptor type f polypeptide-interacting protein alpha-1; PTPRF-interacting protein alpha-1; LIP1; LIP1; LIP1; LIP1; LIP1
Q99536	Q99536			Synaptic vesicle membrane protein VAT-1 homolog	VAT1
Q02790	Q02790			Peptidyl-prolyl cis-trans isomerase FKBP4	FKBP4	PPIase FKBP4; 51 kDa FK506-binding protein; FKBP51; 52 kDa FK506-binding protein; 52 kDa FKBP; FKBP-52; 59 kDa immunophilin; p59; FK506-binding protein 4; FKBP-4; FKBP59; HSP-binding immunophilin; HBI; Immunophilin FKBP52; Rotamase; FKBP52; FKBP52; FKBP52; FKBP52
P13798	P13798			Acylamino-acid-releasing enzyme	APEH	AARE; Acyl-peptide hydrolase; APH; Acylaminoacyl-peptidase; Oxidized protein hydrolase; OPH; D3F15S2,; D3F15S2,; D3F15S2,
O00299	O00299			Chloride intracellular channel protein 1	CLIC1	Chloride channel ABP; Nuclear chloride ion channel 27; NCC27; Regulatory nuclear chloride ion channel protein; hRNCC; G6,; G6,; G6,
P61026	P61026			Ras-related protein Rab-10	RAB10
Q16555	Q16555			Dihydropyrimidinase-related protein 2	DPYSL2	DRP-2; Collapsin response mediator protein 2; CRMP-2; N2A3; Unc-33-like phosphoprotein 2; ULIP-2; CRMP2,; CRMP2,; CRMP2,; CRMP2,; CRMP2,
P46777	P46777			60S ribosomal protein L5	RPL5
P07737	P07737			Profilin-1	PFN1	Epididymis tissue protein Li 184a; Profilin I
P68400	P68400			Casein kinase II subunit alpha	CSNK2A1	CK II alpha; CK2A1; CK2A1; CK2A1; CK2A1; CK2A1; CK2A1; CK2A1
O00487	O00487			26S proteasome non-ATPase regulatory subunit 14	PSMD14	26S proteasome regulatory subunit RPN11; 26S proteasome-associated PAD1 homolog 1; POH1; POH1; POH1
P08237	P08237			ATP-dependent 6-phosphofructokinase, muscle type {ECO:0000255|HAMAP-Rule:MF_03184}	PFKM	ATP-PFK {ECO:0000255|HAMAP-Rule:MF_03184}; PFK-M; 6-phosphofructokinase type A; Phosphofructo-1-kinase isozyme A; PFK-A; Phosphohexokinase {ECO:0000255|HAMAP-Rule:MF_03184}; PFKX; PFKX; PFKX; PFKX; PFKX
O60506	O60506			Heterogeneous nuclear ribonucleoprotein Q	SYNCRIP	hnRNP Q; Glycine- and tyrosine-rich RNA-binding protein; GRY-RBP; NS1-associated protein 1; Synaptotagmin-binding, cytoplasmic RNA-interacting protein; HNRPQ,; HNRPQ,; HNRPQ,; HNRPQ,; HNRPQ,; HNRPQ,; HNRPQ,; HNRPQ,; HNRPQ,; HNRPQ,; HNRPQ,
P46783	P46783			40S ribosomal protein S10	RPS10
O60256	O60256			Phosphoribosyl pyrophosphate synthase-associated protein 2	PRPSAP2	PRPP synthase-associated protein 2; 41 kDa phosphoribosypyrophosphate synthetase-associated protein; PAP41
P07910	P07910			Heterogeneous nuclear ribonucleoproteins C1/C2	HNRNPC	hnRNP C1/C2; HNRPC; HNRPC; HNRPC; HNRPC; HNRPC; HNRPC; HNRPC; HNRPC; HNRPC; HNRPC; HNRPC; HNRPC; HNRPC
Q15369	Q15369			Elongin-C	ELOC	EloC; Elongin 15 kDa subunit; RNA polymerase II transcription factor SIII subunit C; SIII p15; Transcription elongation factor B polypeptide 1; TCEB1; TCEB1; TCEB1
P61006	P61006			Ras-related protein Rab-8A	RAB8A	Oncogene c-mel; MEL,; MEL,; MEL,; MEL,
O75131	O75131			Copine-3 {ECO:0000305}	CPNE3	Copine III {ECO:0000303|PubMed:11041869, ECO:0000312|HGNC:HGNC:2316}; CPN3,; CPN3,; CPN3,
P17858	P17858			ATP-dependent 6-phosphofructokinase, liver type {ECO:0000255|HAMAP-Rule:MF_03184}	PFKL	ATP-PFK {ECO:0000255|HAMAP-Rule:MF_03184}; PFK-L; 6-phosphofructokinase type B; Phosphofructo-1-kinase isozyme B; PFK-B; Phosphohexokinase {ECO:0000255|HAMAP-Rule:MF_03184}
O75351	O75351			Vacuolar protein sorting-associated protein 4B	VPS4B	Cell migration-inducing gene 1 protein; Suppressor of K(+) transport growth defect 1; Protein SKD1; SKD1,; SKD1,; SKD1,
P62753	P62753			40S ribosomal protein S6	RPS6	Phosphoprotein NP33
O94919	O94919			Endonuclease domain-containing 1 protein	ENDOD1	KIAA0830; KIAA0830; KIAA0830; KIAA0830
P52597	P52597			Heterogeneous nuclear ribonucleoprotein F	HNRNPF	hnRNP F; Nucleolin-like protein mcs94-1; HNRPF; HNRPF; HNRPF; HNRPF
P11233	P11233			Ras-related protein Ral-A	RALA	RAL; RAL
Q08380	Q08380			Galectin-3-binding protein	LGALS3BP	Basement membrane autoantigen p105; Lectin galactoside-binding soluble 3-binding protein; Mac-2-binding protein; MAC2BP; Mac-2 BP; Tumor-associated antigen 90K; M2BP; M2BP; M2BP; M2BP; M2BP
P08134	P08134			Rho-related GTP-binding protein RhoC	RHOC	Rho cDNA clone 9; h9; ARH9,; ARH9,; ARH9,
P29317	P29317			Ephrin type-A receptor 2	EPHA2	Epithelial cell kinase; Tyrosine-protein kinase receptor ECK; ECK; ECK; ECK
Q9BY32	Q9BY32			Inosine triphosphate pyrophosphatase {ECO:0000255|HAMAP-Rule:MF_03148}	ITPA	ITPase {ECO:0000255|HAMAP-Rule:MF_03148}; Inosine triphosphatase {ECO:0000255|HAMAP-Rule:MF_03148}; Non-canonical purine NTP pyrophosphatase {ECO:0000255|HAMAP-Rule:MF_03148}; Non-standard purine NTP pyrophosphatase {ECO:0000255|HAMAP-Rule:MF_03148}; Nucleoside-triphosphate diphosphatase {ECO:0000255|HAMAP-Rule:MF_03148}; Nucleoside-triphosphate pyrophosphatase {ECO:0000255|HAMAP-Rule:MF_03148}; …
P20645	P20645			Cation-dependent mannose-6-phosphate receptor	M6PR	CD Man-6-P receptor; CD-MPR; 46 kDa mannose 6-phosphate receptor; MPR 46; MPR46,; MPR46,; MPR46,
Q13310	Q13310			Polyadenylate-binding protein 4	PABPC4	PABP-4; Poly(A)-binding protein 4; Activated-platelet protein 1; APP-1; Inducible poly(A)-binding protein; iPABP; APP1,; APP1,; APP1,; APP1,
P62847	P62847			40S ribosomal protein S24	RPS24
P23921	P23921			Ribonucleoside-diphosphate reductase large subunit	RRM1	Ribonucleoside-diphosphate reductase subunit M1; Ribonucleotide reductase large subunit; RR1; RR1
Q13418	Q13418			Integrin-linked protein kinase	ILK	59 kDa serine/threonine-protein kinase; ILK-1; ILK-2; p59ILK; ILK1,; ILK1,; ILK1,; ILK1,; ILK1,; ILK1,
P01906	P01906			HLA class II histocompatibility antigen, DQ alpha 2 chain	HLA-DQA2	DX alpha chain; HLA class II histocompatibility antigen, DQ(6) alpha chain; HLA-DQA1; MHC class II DQA2; HLA-DXA; HLA-DXA; HLA-DXA; HLA-DXA; HLA-DXA; HLA-DXA
O60701	O60701			UDP-glucose 6-dehydrogenase	UGDH	UDP-Glc dehydrogenase; UDP-GlcDH; UDPGDH
O14578	O14578			Citron Rho-interacting kinase	CIT	CRIK; Serine/threonine-protein kinase 21; CRIK,; CRIK,; CRIK,; CRIK,; CRIK,
P60660	P60660			Myosin light polypeptide 6	MYL6	17 kDa myosin light chain; LC17; Myosin light chain 3; MLC-3; Myosin light chain alkali 3; Myosin light chain A3; Smooth muscle and nonmuscle myosin light chain alkali 6
O60841	O60841			Eukaryotic translation initiation factor 5B	EIF5B	eIF-5B; Translation initiation factor IF-2; IF2,; IF2,; IF2,; IF2,; IF2,; IF2,
Q9Y2J2	Q9Y2J2			Band 4.1-like protein 3	EPB41L3	4.1B; Differentially expressed in adenocarcinoma of the lung protein 1; DAL-1; DAL1,; DAL1,; DAL1,; DAL1,; DAL1,
Q04917	Q04917			14-3-3 protein eta	YWHAH	Protein AS1; YWHA1
Q9Y4F1	Q9Y4F1			FERM, RhoGEF and pleckstrin domain-containing protein 1	FARP1	Chondrocyte-derived ezrin-like protein; Pleckstrin homology domain-containing family C member 2; PH domain-containing family C member 2; CDEP,; CDEP,; CDEP,
O75821	O75821			Eukaryotic translation initiation factor 3 subunit G {ECO:0000255|HAMAP-Rule:MF_03006}	EIF3G	eIF3g {ECO:0000255|HAMAP-Rule:MF_03006}; Eukaryotic translation initiation factor 3 RNA-binding subunit {ECO:0000255|HAMAP-Rule:MF_03006}; eIF-3 RNA-binding subunit {ECO:0000255|HAMAP-Rule:MF_03006}; Eukaryotic translation initiation factor 3 subunit 4 {ECO:0000255|HAMAP-Rule:MF_03006}; eIF-3-delta {ECO:0000255|HAMAP-Rule:MF_03006}; eIF3 p42 {ECO:0000255|HAMAP-Rule:MF_03006}; eIF3 p44 {ECO:000025…
P08670	P08670			Vimentin	VIM
P61224	P61224			Ras-related protein Rap-1b	RAP1B	GTP-binding protein smg p21B
Q68CZ2	Q68CZ2			Tensin-3	TNS3	Tensin-like SH2 domain-containing protein 1; Tumor endothelial marker 6; TEM6,; TEM6,; TEM6,; TEM6,; TEM6,; TEM6,; TEM6,
Q9Y6E0	Q9Y6E0			Serine/threonine-protein kinase 24	STK24	Mammalian STE20-like protein kinase 3; MST-3; STE20-like kinase MST3; MST3,; MST3,; MST3,
P60900	P60900			Proteasome subunit alpha type-6	PSMA6	27 kDa prosomal protein; PROS-27; p27K; Macropain iota chain; Multicatalytic endopeptidase complex iota chain; Proteasome iota chain; PROS27; PROS27; PROS27; PROS27; PROS27; PROS27
P23381	P23381			Tryptophan--tRNA ligase, cytoplasmic	WARS	Interferon-induced protein 53; IFP53; Tryptophanyl-tRNA synthetase; TrpRS; hWRS; IFI53,; IFI53,; IFI53,; IFI53,; IFI53,; IFI53,; IFI53,; IFI53,
P14174	P14174			Macrophage migration inhibitory factor	MIF	MIF; Glycosylation-inhibiting factor; GIF; L-dopachrome isomerase; L-dopachrome tautomerase; Phenylpyruvate tautomerase; GLIF,; GLIF,; GLIF,; GLIF,; GLIF,
Q9Y6E2	Q9Y6E2			Basic leucine zipper and W2 domain-containing protein 2	BZW2
P63220	P63220			40S ribosomal protein S21	RPS21
Q96CW1	Q96CW1			AP-2 complex subunit mu	AP2M1	AP-2 mu chain; Adaptin-mu2; Adaptor protein complex AP-2 subunit mu; Adaptor-related protein complex 2 subunit mu; Clathrin assembly protein complex 2 mu medium chain; Clathrin coat assembly protein AP50; Clathrin coat-associated protein AP50; HA2 50 kDa subunit; Plasma membrane adaptor AP-2 50 kDa protein; CLAPM1,; CLAPM1,; CLAPM1,; CLAPM1,; CLAPM1,
P54577	P54577			Tyrosine--tRNA ligase, cytoplasmic	YARS	Tyrosyl-tRNA synthetase; TyrRS
Q9NZM1	Q9NZM1			Myoferlin	MYOF	Fer-1-like protein 3; FER1L3,; FER1L3,; FER1L3,; FER1L3,; FER1L3,; FER1L3,; FER1L3,; FER1L3,; FER1L3,; FER1L3,; FER1L3,; FER1L3,
P06748	P06748			Nucleophosmin	NPM1	NPM; Nucleolar phosphoprotein B23; Nucleolar protein NO38; Numatrin; NPM; NPM; NPM; NPM; NPM; NPM; NPM; NPM; NPM; NPM; NPM; NPM; NPM; NPM; NPM; NPM; NPM; NPM; NPM; NPM; NPM; NPM
P21266	P21266			Glutathione S-transferase Mu 3	GSTM3	GST class-mu 3; GSTM3-3; hGSTM3-3; GST5; GST5; GST5
P61088	P61088			Ubiquitin-conjugating enzyme E2 N	UBE2N	Bendless-like ubiquitin-conjugating enzyme; E2 ubiquitin-conjugating enzyme N; Ubc13; UbcH13; Ubiquitin carrier protein N; Ubiquitin-protein ligase N; BLU; BLU; BLU
P10155	P10155			60 kDa SS-A/Ro ribonucleoprotein	TROVE2	60 kDa Ro protein; 60 kDa ribonucleoprotein Ro; RoRNP; Ro 60 kDa autoantigen; Sjoegren syndrome antigen A2; Sjoegren syndrome type A antigen; SS-A; TROVE domain family member 2; RO60,; RO60,; RO60,; RO60,; RO60,; RO60,; RO60,; RO60,; RO60,
Q96TA1	Q96TA1			Niban-like protein 1	FAM129B	Meg-3; Melanoma invasion by ERK; MINERVA; Protein FAM129B; C9orf88; C9orf88; C9orf88; C9orf88; C9orf88; C9orf88
Q9NR45	Q9NR45			Sialic acid synthase	NANS	N-acetylneuraminate synthase; N-acetylneuraminate-9-phosphate synthase; N-acetylneuraminic acid phosphate synthase; N-acetylneuraminic acid synthase; SAS; SAS; SAS; SAS; SAS
Q99733	Q99733			Nucleosome assembly protein 1-like 4	NAP1L4	Nucleosome assembly protein 2; NAP-2; NAP2; NAP2; NAP2
P60866	P60866			40S ribosomal protein S20	RPS20
O00159	O00159			Unconventional myosin-Ic	MYO1C	Myosin I beta; MMI-beta; MMIb
P46060	P46060			Ran GTPase-activating protein 1	RANGAP1	RanGAP1; KIAA1835,; KIAA1835,
P16070	P16070			CD44 antigen	CD44	CDw44; Epican; Extracellular matrix receptor III; ECMR-III; GP90 lymphocyte homing/adhesion receptor; HUTCH-I; Heparan sulfate proteoglycan; Hermes antigen; Hyaluronate receptor; Phagocytic glycoprotein 1; PGP-1; Phagocytic glycoprotein I; PGP-I; LHR,; LHR,; LHR,; LHR,; LHR,; LHR,; LHR,; LHR,; LHR,; LHR,; LHR,; LHR,; LHR,; LHR,; LHR,; LHR,; LHR,; LHR,; LHR,; LHR,; LHR,; LHR,; LHR,; LHR,; LHR,; LH…
P28838	P28838			Cytosol aminopeptidase	LAP3	Leucine aminopeptidase 3; LAP-3; Leucyl aminopeptidase; Peptidase S; Proline aminopeptidase; Prolyl aminopeptidase; LAPEP,; LAPEP,; LAPEP,; LAPEP,; LAPEP,
Q15149	Q15149			Plectin	PLEC	PCN; PLTN; Hemidesmosomal protein 1; HD1; Plectin-1; PLEC1; PLEC1; PLEC1; PLEC1; PLEC1; PLEC1; PLEC1; PLEC1; PLEC1; PLEC1; PLEC1
P20073	P20073			Annexin A7	ANXA7	Annexin VII; Annexin-7; Synexin; ANX7,; ANX7,; ANX7,; ANX7,
P62140	P62140			Serine/threonine-protein phosphatase PP1-beta catalytic subunit	PPP1CB	PP-1B; PPP1CD
O00429	O00429			Dynamin-1-like protein	DNM1L	Dnm1p/Vps1p-like protein; DVLP; Dynamin family member proline-rich carboxyl-terminal domain less; Dymple; Dynamin-like protein; Dynamin-like protein 4; Dynamin-like protein IV; HdynIV; Dynamin-related protein 1; DLP1,; DLP1,; DLP1,; DLP1,; DLP1,; DLP1,; DLP1,; DLP1,; DLP1,; DLP1,; DLP1,; DLP1,
P50443	P50443			Sulfate transporter	SLC26A2	Diastrophic dysplasia protein; Solute carrier family 26 member 2; DTD,; DTD,; DTD,; DTD,
Q6IBS0	Q6IBS0			Twinfilin-2	TWF2	A6-related protein; hA6RP; Protein tyrosine kinase 9-like; Twinfilin-1-like protein; PTK9L; PTK9L
P38606	P38606			V-type proton ATPase catalytic subunit A	ATP6V1A	V-ATPase subunit A; V-ATPase 69 kDa subunit; Vacuolar ATPase isoform VA68; Vacuolar proton pump subunit alpha; ATP6A1,; ATP6A1,; ATP6A1,; ATP6A1,; ATP6A1,; ATP6A1,; ATP6A1,
Q96RW7	Q96RW7			Hemicentin-1	HMCN1	Fibulin-6; FIBL-6; FIBL6; FIBL6; FIBL6; FIBL6; FIBL6; FIBL6
O43795	O43795			Unconventional myosin-Ib	MYO1B	MYH-1c; Myosin I alpha; MMI-alpha; MMIa
P68363	P68363			Tubulin alpha-1B chain	TUBA1B	Alpha-tubulin ubiquitous; Tubulin K-alpha-1; Tubulin alpha-ubiquitous chain
P40429	P40429			60S ribosomal protein L13a	RPL13A	23 kDa highly basic protein
P20039	P20039			HLA class II histocompatibility antigen, DRB1-11 beta chain	HLA-DRB1	DR-5; DR5; DRw11; MHC class II antigen DRB1*11
P23458	P23458			Tyrosine-protein kinase JAK1	JAK1	Janus kinase 1; JAK-1; JAK1A,; JAK1A,; JAK1A,
P52292	P52292			Importin subunit alpha-1	KPNA2	Karyopherin subunit alpha-2; RAG cohort protein 1; SRP1-alpha; RCH1,; RCH1,; RCH1,; RCH1,
O75083	O75083			WD repeat-containing protein 1	WDR1	Actin-interacting protein 1; AIP1; NORI-1
P06733	P06733			Alpha-enolase	ENO1	2-phospho-D-glycerate hydro-lyase; C-myc promoter-binding protein; Enolase 1; MBP-1; MPB-1; Non-neural enolase; NNE; Phosphopyruvate hydratase; Plasminogen-binding protein; ENO1L1,; ENO1L1,; ENO1L1,; ENO1L1,; ENO1L1,; ENO1L1,; ENO1L1,; ENO1L1,; ENO1L1,; ENO1L1,; ENO1L1,; ENO1L1,; ENO1L1,; ENO1L1,; ENO1L1,; ENO1L1,
P11169	P11169			Solute carrier family 2, facilitated glucose transporter member 3	SLC2A3	Glucose transporter type 3, brain; GLUT-3; GLUT3; GLUT3; GLUT3; GLUT3; GLUT3
P00338	P00338			L-lactate dehydrogenase A chain	LDHA	LDH-A; Cell proliferation-inducing gene 19 protein; LDH muscle subunit; LDH-M; Renal carcinoma antigen NY-REN-59
O75340	O75340			Programmed cell death protein 6	PDCD6	Apoptosis-linked gene 2 protein; Probable calcium-binding protein ALG-2; ALG2; ALG2; ALG2; ALG2; ALG2
Q15366	Q15366			Poly(rC)-binding protein 2	PCBP2	Alpha-CP2; Heterogeneous nuclear ribonucleoprotein E2; hnRNP E2
P50914	P50914			60S ribosomal protein L14	RPL14	CAG-ISL 7
A0FGR8	A0FGR8			Extended synaptotagmin-2	ESYT2	E-Syt2; Chr2Syt; FAM62B,; FAM62B,; FAM62B,; FAM62B,; FAM62B,; FAM62B,; FAM62B,; FAM62B,; FAM62B,
P30512	P30512			HLA class I histocompatibility antigen, A-29 alpha chain	HLA-A	Aw-19; MHC class I antigen A*29; HLAA; HLAA; HLAA; HLAA; HLAA; HLAA
P06396	P06396			Gelsolin	GSN	AGEL; Actin-depolymerizing factor; ADF; Brevin
P02787	P02787			Serotransferrin	TF	Transferrin; Beta-1 metal-binding globulin; Siderophilin
Q00341	Q00341			Vigilin	HDLBP	High density lipoprotein-binding protein; HDL-binding protein; HBP,; HBP,; HBP,; HBP,; HBP,
P54652	P54652			Heat shock-related 70 kDa protein 2	HSPA2	Heat shock 70 kDa protein 2
P07355	P07355			Annexin A2	ANXA2	Annexin II; Annexin-2; Calpactin I heavy chain; Calpactin-1 heavy chain; Chromobindin-8; Lipocortin II; Placental anticoagulant protein IV; PAP-IV; Protein I; p36; ANX2,; ANX2,; ANX2,; ANX2,; ANX2,; ANX2,
P01111	P01111			GTPase NRas	NRAS	Transforming protein N-Ras; HRAS1; HRAS1; HRAS1; HRAS1
P23284	P23284			Peptidyl-prolyl cis-trans isomerase B	PPIB	PPIase B; CYP-S1; Cyclophilin B; Rotamase B; S-cyclophilin; SCYLP; CYPB; CYPB; CYPB; CYPB
O60462	O60462			Neuropilin-2	NRP2	Vascular endothelial cell growth factor 165 receptor 2; VEGF165R2; VEGF165R2; VEGF165R2; VEGF165R2; VEGF165R2; VEGF165R2; VEGF165R2; VEGF165R2; VEGF165R2; VEGF165R2; VEGF165R2; VEGF165R2
P43121	P43121			Cell surface glycoprotein MUC18	MCAM	Cell surface glycoprotein P1H12; Melanoma cell adhesion molecule; Melanoma-associated antigen A32; Melanoma-associated antigen MUC18; S-endo 1 endothelial-associated antigen; MUC18; MUC18; MUC18; MUC18; MUC18
P62829	P62829			60S ribosomal protein L23	RPL23	60S ribosomal protein L17
O14818	O14818			Proteasome subunit alpha type-7	PSMA7	Proteasome subunit RC6-1; Proteasome subunit XAPC7; HSPC; HSPC; HSPC; HSPC; HSPC; HSPC
Q8NC51	Q8NC51			Plasminogen activator inhibitor 1 RNA-binding protein	SERBP1	PAI1 RNA-binding protein 1; PAI-RBP1; SERPINE1 mRNA-binding protein 1; PAIRBP1; PAIRBP1; PAIRBP1; PAIRBP1; PAIRBP1; PAIRBP1; PAIRBP1; PAIRBP1; PAIRBP1; PAIRBP1
P10321	P10321			HLA class I histocompatibility antigen, Cw-7 alpha chain	HLA-C	MHC class I antigen Cw*7; HLAC; HLAC; HLAC; HLAC; HLAC; HLAC; HLAC; HLAC; HLAC; HLAC; HLAC
P48960	P48960			CD97 antigen	CD97	Leukocyte antigen CD97
P53794	P53794			Sodium/myo-inositol cotransporter	SLC5A3	Na(+)/myo-inositol cotransporter; Sodium/myo-inositol transporter 1; SMIT1; Solute carrier family 5 member 3
Q13200	Q13200			26S proteasome non-ATPase regulatory subunit 2	PSMD2	26S proteasome regulatory subunit RPN1; 26S proteasome regulatory subunit S2; 26S proteasome subunit p97; Protein 55.11; Tumor necrosis factor type 1 receptor-associated protein 2; TRAP2; TRAP2; TRAP2; TRAP2; TRAP2; TRAP2; TRAP2; TRAP2; TRAP2
Q9NZW5	Q9NZW5			MAGUK p55 subfamily member 6	MPP6	Veli-associated MAGUK 1; VAM-1; VAM1; VAM1; VAM1
P29692	P29692			Elongation factor 1-delta	EEF1D	EF-1-delta; Antigen NY-CO-4; EF1D; EF1D; EF1D; EF1D; EF1D; EF1D; EF1D
Q07960	Q07960			Rho GTPase-activating protein 1	ARHGAP1	CDC42 GTPase-activating protein; GTPase-activating protein rhoGAP; Rho-related small GTPase protein activator; Rho-type GTPase-activating protein 1; p50-RhoGAP; CDC42GAP,; CDC42GAP,
P26368	P26368			Splicing factor U2AF 65 kDa subunit	U2AF2	U2 auxiliary factor 65 kDa subunit; hU2AF(65); hU2AF65; U2 snRNP auxiliary factor large subunit; U2AF65; U2AF65
P52209	P52209			6-phosphogluconate dehydrogenase, decarboxylating	PGD	PGDH; PGDH; PGDH; PGDH
Q13464	Q13464			Rho-associated protein kinase 1	ROCK1	Renal carcinoma antigen NY-REN-35; Rho-associated, coiled-coil-containing protein kinase 1; Rho-associated, coiled-coil-containing protein kinase I; ROCK-I; p160 ROCK-1; p160ROCK
O43242	O43242			26S proteasome non-ATPase regulatory subunit 3	PSMD3	26S proteasome regulatory subunit RPN3; 26S proteasome regulatory subunit S3; Proteasome subunit p58
Q6IQ22	Q6IQ22			Ras-related protein Rab-12	RAB12
P11047	P11047			Laminin subunit gamma-1	LAMC1	Laminin B2 chain; Laminin-1 subunit gamma; Laminin-10 subunit gamma; Laminin-11 subunit gamma; Laminin-2 subunit gamma; Laminin-3 subunit gamma; Laminin-4 subunit gamma; Laminin-6 subunit gamma; Laminin-7 subunit gamma; Laminin-8 subunit gamma; Laminin-9 subunit gamma; S-laminin subunit gamma; S-LAM gamma; LAMB2; LAMB2
Q99873	Q99873			Protein arginine N-methyltransferase 1	PRMT1	Histone-arginine N-methyltransferase PRMT1; Interferon receptor 1-bound protein 4; HMT2,; HMT2,; HMT2,; HMT2,; HMT2,; HMT2,; HMT2,; HMT2,; HMT2,; HMT2,; HMT2,; HMT2,
P35221	P35221			Catenin alpha-1	CTNNA1	Alpha E-catenin; Cadherin-associated protein; Renal carcinoma antigen NY-REN-13
P46781	P46781			40S ribosomal protein S9	RPS9
Q9NQC3	Q9NQC3			Reticulon-4	RTN4	Foocen; Neurite outgrowth inhibitor; Nogo protein; Neuroendocrine-specific protein; NSP; Neuroendocrine-specific protein C homolog; RTN-x; Reticulon-5; KIAA0886,; KIAA0886,; KIAA0886,; KIAA0886,; KIAA0886,; KIAA0886,; KIAA0886,; KIAA0886,; KIAA0886,; KIAA0886,; KIAA0886,; KIAA0886,; KIAA0886,; KIAA0886,
P05387	P05387			60S acidic ribosomal protein P2	RPLP2	Renal carcinoma antigen NY-REN-44; D11S2243E,; D11S2243E,
P05556	P05556			Integrin beta-1	ITGB1	Fibronectin receptor subunit beta; Glycoprotein IIa; GPIIA; VLA-4 subunit beta; FNRB,; FNRB,; FNRB,; FNRB,; FNRB,; FNRB,; FNRB,; FNRB,; FNRB,; FNRB,; FNRB,; FNRB,; FNRB,; FNRB,; FNRB,; FNRB,; FNRB,
O15144	O15144			Actin-related protein 2/3 complex subunit 2	ARPC2	Arp2/3 complex 34 kDa subunit; p34-ARC; ARC34; ARC34; ARC34
Q9Y6D5	Q9Y6D5			Brefeldin A-inhibited guanine nucleotide-exchange protein 2	ARFGEF2	Brefeldin A-inhibited GEP 2; ADP-ribosylation factor guanine nucleotide-exchange factor 2; ARFGEP2,; ARFGEP2,; ARFGEP2,
P46926	P46926			Glucosamine-6-phosphate isomerase 1	GNPDA1	Glucosamine-6-phosphate deaminase 1; GNPDA 1; GlcN6P deaminase 1; Oscillin; GNPI,; GNPI,; GNPI,
Q6YHK3	Q6YHK3			CD109 antigen	CD109	150 kDa TGF-beta-1-binding protein; C3 and PZP-like alpha-2-macroglobulin domain-containing protein 7; Platelet-specific Gov antigen; p180; r150; CPAMD7; CPAMD7; CPAMD7; CPAMD7; CPAMD7; CPAMD7; CPAMD7; CPAMD7; CPAMD7; CPAMD7; CPAMD7; CPAMD7; CPAMD7
P83731	P83731			60S ribosomal protein L24	RPL24	60S ribosomal protein L30
Q15393	Q15393			Splicing factor 3B subunit 3	SF3B3	Pre-mRNA-splicing factor SF3b 130 kDa subunit; SF3b130; STAF130; Spliceosome-associated protein 130; SAP 130; KIAA0017,; KIAA0017,; KIAA0017,; KIAA0017,; KIAA0017,; KIAA0017,
Q9Y3A5	Q9Y3A5			Ribosome maturation protein SBDS	SBDS	Shwachman-Bodian-Diamond syndrome protein
P48739	P48739			Phosphatidylinositol transfer protein beta isoform	PITPNB	PI-TP-beta; PtdIns transfer protein beta; PtdInsTP beta
P52788	P52788			Spermine synthase	SMS	SPMSY; Spermidine aminopropyltransferase
P29966	P29966			Myristoylated alanine-rich C-kinase substrate	MARCKS	MARCKS; Protein kinase C substrate, 80 kDa protein, light chain; 80K-L protein; PKCSL; MACS,; MACS,; MACS,; MACS,
P35613	P35613			Basigin	BSG	5F7; Collagenase stimulatory factor; Extracellular matrix metalloproteinase inducer; EMMPRIN; Leukocyte activation antigen M6; OK blood group antigen; Tumor cell-derived collagenase stimulatory factor; TCSF
Q16563	Q16563			Synaptophysin-like protein 1	SYPL1	Pantophysin; SYPL; SYPL; SYPL
P13861	P13861			cAMP-dependent protein kinase type II-alpha regulatory subunit	PRKAR2A	PKR2,; PKR2,; PKR2,
Q02241	Q02241			Kinesin-like protein KIF23	KIF23	Kinesin-like protein 5; Mitotic kinesin-like protein 1; KNSL5,; KNSL5,; KNSL5,
P31948	P31948			Stress-induced-phosphoprotein 1	STIP1	STI1; Hsc70/Hsp90-organizing protein; Hop; Renal carcinoma antigen NY-REN-11; Transformation-sensitive protein IEF SSP 3521
P26196	P26196			Probable ATP-dependent RNA helicase DDX6 {ECO:0000305}	DDX6	ATP-dependent RNA helicase p54; DEAD box protein 6; Oncogene RCK; HLR2,; HLR2,
P18669	P18669			Phosphoglycerate mutase 1	PGAM1	BPG-dependent PGAM 1; Phosphoglycerate mutase isozyme B; PGAM-B; PGAMA; PGAMA
P09543	P09543			2',3'-cyclic-nucleotide 3'-phosphodiesterase	CNP	CNP; CNPase
P47756	P47756			F-actin-capping protein subunit beta	CAPZB	CapZ beta
O00231	O00231			26S proteasome non-ATPase regulatory subunit 11	PSMD11	26S proteasome regulatory subunit RPN6; 26S proteasome regulatory subunit S9; 26S proteasome regulatory subunit p44.5
P46779	P46779			60S ribosomal protein L28	RPL28
O95433	O95433			Activator of 90 kDa heat shock protein ATPase homolog 1	AHSA1	AHA1; p38; C14orf3; C14orf3; C14orf3; C14orf3; C14orf3
Q06210	Q06210			Glutamine--fructose-6-phosphate aminotransferase [isomerizing] 1	GFPT1	D-fructose-6-phosphate amidotransferase 1; Glutamine:fructose-6-phosphate amidotransferase 1; GFAT 1; GFAT1; Hexosephosphate aminotransferase 1; GFAT,; GFAT,; GFAT,
P30046	P30046			D-dopachrome decarboxylase	DDT	D-dopachrome tautomerase; Phenylpyruvate tautomerase II
Q9Y5X3	Q9Y5X3			Sorting nexin-5	SNX5
P11717	P11717			Cation-independent mannose-6-phosphate receptor	IGF2R	CI Man-6-P receptor; CI-MPR; M6PR; 300 kDa mannose 6-phosphate receptor; MPR 300; Insulin-like growth factor 2 receptor; Insulin-like growth factor II receptor; IGF-II receptor; M6P/IGF2 receptor; M6P/IGF2R; MPRI; MPRI; MPRI
P15880	P15880			40S ribosomal protein S2	RPS2	40S ribosomal protein S4; Protein LLRep3; RPS4; RPS4; RPS4; RPS4
O43681	O43681			ATPase ASNA1 {ECO:0000255|HAMAP-Rule:MF_03112}	ASNA1	Arsenical pump-driving ATPase {ECO:0000255|HAMAP-Rule:MF_03112}; Arsenite-stimulated ATPase {ECO:0000255|HAMAP-Rule:MF_03112}; Transmembrane domain recognition complex 40 kDa ATPase subunit; hARSA-I; hASNA-I; ARSA,; ARSA,; ARSA,; ARSA,; ARSA,
P40227	P40227			T-complex protein 1 subunit zeta	CCT6A	TCP-1-zeta; Acute morphine dependence-related protein 2; CCT-zeta-1; HTR3; Tcp20; CCT6,; CCT6,; CCT6,; CCT6,; CCT6,
P49368	P49368			T-complex protein 1 subunit gamma	CCT3	TCP-1-gamma; CCT-gamma; hTRiC5; CCTG,; CCTG,; CCTG,; CCTG,
O60684	O60684			Importin subunit alpha-7	KPNA6	Karyopherin subunit alpha-6; IPOA7; IPOA7; IPOA7; IPOA7
O75534	O75534			Cold shock domain-containing protein E1	CSDE1	N-ras upstream gene protein; Protein UNR; D1S155E,; D1S155E,; D1S155E,; D1S155E,; D1S155E,; D1S155E,; D1S155E,; D1S155E,; D1S155E,; D1S155E,
P19623	P19623			Spermidine synthase	SRM	SPDSY; Putrescine aminopropyltransferase; SPS1,; SPS1,; SPS1,
Q13557	Q13557			Calcium/calmodulin-dependent protein kinase type II subunit delta	CAMK2D	CaM kinase II subunit delta; CaMK-II subunit delta; CAMKD; CAMKD; CAMKD; CAMKD; CAMKD; CAMKD; CAMKD
Q9BUL8	Q9BUL8			Programmed cell death protein 10	PDCD10	Cerebral cavernous malformations 3 protein; TF-1 cell apoptosis-related protein 15; CCM3,; CCM3,; CCM3,; CCM3,
Q8N8S7	Q8N8S7			Protein enabled homolog	ENAH	MENA; MENA; MENA; MENA; MENA; MENA; MENA; MENA
Q13277	Q13277			Syntaxin-3	STX3	STX3A; STX3A; STX3A; STX3A; STX3A
P26038	P26038			Moesin	MSN	Membrane-organizing extension spike protein
P14384	P14384			Carboxypeptidase M	CPM	CPM
P04440	P04440			HLA class II histocompatibility antigen, DP beta 1 chain	HLA-DPB1	HLA class II histocompatibility antigen, DP(W4) beta chain; MHC class II antigen DPB1; HLA-DP1B; HLA-DP1B; HLA-DP1B; HLA-DP1B; HLA-DP1B; HLA-DP1B; HLA-DP1B; HLA-DP1B; HLA-DP1B; HLA-DP1B; HLA-DP1B; HLA-DP1B; HLA-DP1B; HLA-DP1B; HLA-DP1B; HLA-DP1B; HLA-DP1B; HLA-DP1B; HLA-DP1B; HLA-DP1B; HLA-DP1B; HLA-DP1B; HLA-DP1B; HLA-DP1B; HLA-DP1B; HLA-DP1B; HLA-DP1B; HLA-DP1B; HLA-DP1B; HLA-DP1B; HLA-DP1B; HL…
Q96QK1	Q96QK1			Vacuolar protein sorting-associated protein 35	VPS35	hVPS35; Maternal-embryonic 3; Vesicle protein sorting 35; MEM3; MEM3; MEM3; MEM3; MEM3; MEM3; MEM3; MEM3; MEM3; MEM3
Q6UVY6	Q6UVY6			DBH-like monooxygenase protein 1	MOXD1	Monooxygenase X; MOX; MOX; MOX; MOX; MOX; MOX
P55011	P55011			Solute carrier family 12 member 2	SLC12A2	Basolateral Na-K-Cl symporter; Bumetanide-sensitive sodium-(potassium)-chloride cotransporter 1; NKCC1; NKCC1; NKCC1
Q13283	Q13283			Ras GTPase-activating protein-binding protein 1	G3BP1	G3BP-1; ATP-dependent DNA helicase VIII; hDH VIII; GAP SH3 domain-binding protein 1; G3BP; G3BP
P35268	P35268			60S ribosomal protein L22	RPL22	EBER-associated protein; EAP; Epstein-Barr virus small RNA-associated protein; Heparin-binding protein HBp15
P13489	P13489			Ribonuclease inhibitor	RNH1	Placental ribonuclease inhibitor; Placental RNase inhibitor; Ribonuclease/angiogenin inhibitor 1; RAI; PRI,; PRI,; PRI,; PRI,; PRI,
P62851	P62851			40S ribosomal protein S25	RPS25
O15145	O15145			Actin-related protein 2/3 complex subunit 3	ARPC3	Arp2/3 complex 21 kDa subunit; p21-ARC; ARC21; ARC21
Q13867	Q13867			Bleomycin hydrolase	BLMH	BH; BLM hydrolase; BMH
Q9Y243	Q9Y243			RAC-gamma serine/threonine-protein kinase	AKT3	Protein kinase Akt-3; Protein kinase B gamma; PKB gamma; RAC-PK-gamma; STK-2; PKBG; PKBG; PKBG; PKBG; PKBG; PKBG
Q53GQ0	Q53GQ0			Very-long-chain 3-oxoacyl-CoA reductase {ECO:0000305}	HSD17B12	17-beta-hydroxysteroid dehydrogenase 12 {ECO:0000303|PubMed:16166196}; 17-beta-HSD 12 {ECO:0000303|PubMed:16166196}; 3-ketoacyl-CoA reductase {ECO:0000303|PubMed:12482854}; KAR {ECO:0000303|PubMed:12482854}; Estradiol 17-beta-dehydrogenase 12 {ECO:0000303|PubMed:16166196}; Short chain dehydrogenase/reductase family 12C member 1; SDR12C1; SDR12C1; SDR12C1; SDR12C1; SDR12C1; SDR12C1
Q9BTT6	Q9BTT6			Leucine-rich repeat-containing protein 1	LRRC1	LANO adapter protein; LAP and no PDZ protein; LANO; LANO; LANO; LANO
P51153	P51153			Ras-related protein Rab-13	RAB13	Cell growth-inhibiting gene 4 protein
P62854	P62854			40S ribosomal protein S26	RPS26
Q16831	Q16831			Uridine phosphorylase 1	UPP1	UPase 1; UrdPase 1; UP; UP; UP
P14618	P14618			Pyruvate kinase PKM	PKM	Cytosolic thyroid hormone-binding protein; CTHBP; Opa-interacting protein 3; OIP-3; Pyruvate kinase 2/3; Pyruvate kinase muscle isozyme; Thyroid hormone-binding protein 1; THBP1; Tumor M2-PK; p58; OIP3,; OIP3,; OIP3,; OIP3,; OIP3,; OIP3,; OIP3,; OIP3,; OIP3,; OIP3,; OIP3,; OIP3,
Q8NG11	Q8NG11			Tetraspanin-14	TSPAN14	Tspan-14; DC-TM4F2; Transmembrane 4 superfamily member 14; TM4SF14; TM4SF14; TM4SF14; TM4SF14; TM4SF14; TM4SF14; TM4SF14; TM4SF14
Q96RD7	Q96RD7			Pannexin-1	PANX1	MRS1; MRS1; MRS1; MRS1; MRS1; MRS1; MRS1
Q00325	Q00325			Phosphate carrier protein, mitochondrial	SLC25A3	Phosphate transport protein; PTP; Solute carrier family 25 member 3; PHC; PHC; PHC; PHC
P43007	P43007			Neutral amino acid transporter A	SLC1A4	Alanine/serine/cysteine/threonine transporter 1; ASCT-1; SATT; Solute carrier family 1 member 4; ASCT1,; ASCT1,; ASCT1,
P10599	P10599			Thioredoxin	TXN	Trx; ATL-derived factor; ADF; Surface-associated sulphydryl protein; SASP; TRDX,; TRDX,; TRDX,; TRDX,; TRDX,; TRDX,
P53621	P53621			Coatomer subunit alpha	COPA	Alpha-coat protein; Alpha-COP; HEP-COP; HEPCOP
Q9NTK5	Q9NTK5			Obg-like ATPase 1 {ECO:0000255|HAMAP-Rule:MF_03167}	OLA1	DNA damage-regulated overexpressed in cancer 45; DOC45; GTP-binding protein 9; GTPBP9; GTPBP9; GTPBP9; GTPBP9; GTPBP9; GTPBP9; GTPBP9; GTPBP9; GTPBP9; GTPBP9; GTPBP9; GTPBP9; GTPBP9; GTPBP9; GTPBP9; GTPBP9; GTPBP9; GTPBP9
P26639	P26639			Threonine--tRNA ligase, cytoplasmic	TARS	Threonyl-tRNA synthetase; ThrRS
O60568	O60568			Procollagen-lysine,2-oxoglutarate 5-dioxygenase 3	PLOD3	Lysyl hydroxylase 3; LH3
P50502	P50502			Hsc70-interacting protein	ST13	Hip; Aging-associated protein 2; Progesterone receptor-associated p48 protein; Protein FAM10A1; Putative tumor suppressor ST13; Renal carcinoma antigen NY-REN-33; Suppression of tumorigenicity 13 protein; AAG2,; AAG2,; AAG2,
P40939	P40939			Name: Full=Long chain 3-hydroxyacyl-CoA dehydrogenase	HADHA	78 kDa gastrin-binding protein; TP-alpha; HADH; HADH; HADH; HADH; HADH; HADH; HADH; HADH
P12236	P12236			ADP/ATP translocase 3	SLC25A6	ADP,ATP carrier protein 3; ADP,ATP carrier protein, isoform T2; ANT 2; Adenine nucleotide translocator 3; ANT 3; Solute carrier family 25 member 6; ANT3; ANT3
Q15436	Q15436			Protein transport protein Sec23A	SEC23A	SEC23-related protein A
Q9Y266	Q9Y266			Nuclear migration protein nudC	NUDC	Nuclear distribution protein C homolog
Q07021	Q07021			Complement component 1 Q subcomponent-binding protein, mitochondrial	C1QBP	ASF/SF2-associated protein p32; Glycoprotein gC1qBP; C1qBP; Hyaluronan-binding protein 1; Mitochondrial matrix protein p32; gC1q-R protein; p33; GC1QBP,; GC1QBP,; GC1QBP,
Q9H0E2	Q9H0E2			Toll-interacting protein	TOLLIP
P40121	P40121			Macrophage-capping protein	CAPG	Actin regulatory protein CAP-G; AFCP,; AFCP,; AFCP,; AFCP,
P59998	P59998			Actin-related protein 2/3 complex subunit 4	ARPC4	Arp2/3 complex 20 kDa subunit; p20-ARC; ARC20; ARC20; ARC20; ARC20; ARC20; ARC20; ARC20
P28066	P28066			Proteasome subunit alpha type-5	PSMA5	Macropain zeta chain; Multicatalytic endopeptidase complex zeta chain; Proteasome zeta chain
O14980	O14980			Exportin-1	XPO1	Exp1; Chromosome region maintenance 1 protein homolog; CRM1; CRM1; CRM1; CRM1; CRM1; CRM1; CRM1
Q9Y265	Q9Y265			RuvB-like 1	RUVBL1	49 kDa TATA box-binding protein-interacting protein; 49 kDa TBP-interacting protein; 54 kDa erythrocyte cytosolic protein; ECP-54; INO80 complex subunit H; Nuclear matrix protein 238; NMP 238; Pontin 52; TIP49a; TIP60-associated protein 54-alpha; TAP54-alpha; INO80H,; INO80H,; INO80H,; INO80H,; INO80H,; INO80H,; INO80H,; INO80H,
Q9UBI6	Q9UBI6			Guanine nucleotide-binding protein G(I)/G(S)/G(O) subunit gamma-12	GNG12
Q16401	Q16401			26S proteasome non-ATPase regulatory subunit 5	PSMD5	26S protease subunit S5 basic; 26S proteasome subunit S5B; KIAA0072; KIAA0072; KIAA0072; KIAA0072
P11142	P11142			Heat shock cognate 71 kDa protein	HSPA8	Heat shock 70 kDa protein 8; Lipopolysaccharide-associated protein 1; LAP-1; LPS-associated protein 1; HSC70,; HSC70,
P39656	P39656			Dolichyl-diphosphooligosaccharide--protein glycosyltransferase 48 kDa subunit	DDOST	DDOST 48 kDa subunit; Oligosaccharyl transferase 48 kDa subunit; KIAA0115,; KIAA0115,; KIAA0115,; KIAA0115,; KIAA0115,; KIAA0115,; KIAA0115,; KIAA0115,
P08754	P08754			Guanine nucleotide-binding protein G(k) subunit alpha {ECO:0000303|PubMed:2452165}	GNAI3	G(i) alpha-3
Q9BXS5	Q9BXS5			AP-1 complex subunit mu-1	AP1M1	AP-mu chain family member mu1A; Adaptor protein complex AP-1 subunit mu-1; Adaptor-related protein complex 1 subunit mu-1; Clathrin assembly protein complex 1 mu-1 medium chain 1; Clathrin coat assembly protein AP47; Clathrin coat-associated protein AP47; Golgi adaptor HA1/AP1 adaptin mu-1 subunit; Mu-adaptin 1; Mu1A-adaptin; CLTNM; CLTNM
P61163	P61163			Alpha-centractin	ACTR1A	Centractin; ARP1; Actin-RPV; Centrosome-associated actin homolog; CTRN1; CTRN1; CTRN1
P07942	P07942			Laminin subunit beta-1	LAMB1	Laminin B1 chain; Laminin-1 subunit beta; Laminin-10 subunit beta; Laminin-12 subunit beta; Laminin-2 subunit beta; Laminin-6 subunit beta; Laminin-8 subunit beta
P11216	P11216			Glycogen phosphorylase, brain form {ECO:0000303|PubMed:3346228}	PYGB
Q9ULC3	Q9ULC3			Ras-related protein Rab-23	RAB23
Q9NVJ2	Q9NVJ2			ADP-ribosylation factor-like protein 8B	ARL8B	ADP-ribosylation factor-like protein 10C; Novel small G protein indispensable for equal chromosome segregation 1; ARL10C,; ARL10C,
P55010	P55010			Eukaryotic translation initiation factor 5	EIF5	eIF-5
O43707	O43707			Alpha-actinin-4 {ECO:0000305}	ACTN4	Non-muscle alpha-actinin 4 {ECO:0000303|PubMed:10656685}
Q01813	Q01813			ATP-dependent 6-phosphofructokinase, platelet type {ECO:0000255|HAMAP-Rule:MF_03184}	PFKP	ATP-PFK {ECO:0000255|HAMAP-Rule:MF_03184}; PFK-P; 6-phosphofructokinase type C; Phosphofructo-1-kinase isozyme C; PFK-C; Phosphohexokinase {ECO:0000255|HAMAP-Rule:MF_03184}; PFKF; PFKF; PFKF; PFKF
Q02952	Q02952			A-kinase anchor protein 12	AKAP12	AKAP-12; A-kinase anchor protein 250 kDa; AKAP 250; Gravin; Myasthenia gravis autoantigen; AKAP250; AKAP250; AKAP250; AKAP250; AKAP250; AKAP250; AKAP250; AKAP250
P28482	P28482			Mitogen-activated protein kinase 1	MAPK1	MAP kinase 1; MAPK 1; ERT1; Extracellular signal-regulated kinase 2; ERK-2; MAP kinase isoform p42; p42-MAPK; Mitogen-activated protein kinase 2; MAP kinase 2; MAPK 2; ERK2,; ERK2,
Q09028	Q09028			Histone-binding protein RBBP4	RBBP4	Chromatin assembly factor 1 subunit C; CAF-1 subunit C; Chromatin assembly factor I p48 subunit; CAF-I 48 kDa subunit; CAF-I p48; Nucleosome-remodeling factor subunit RBAP48; Retinoblastoma-binding protein 4; RBBP-4; Retinoblastoma-binding protein p48; RBAP48; RBAP48; RBAP48; RBAP48; RBAP48; RBAP48; RBAP48
P53618	P53618			Coatomer subunit beta	COPB1	Beta-coat protein; Beta-COP; COPB; COPB; COPB; COPB; COPB
Q9Y5X2	Q9Y5X2			Sorting nexin-8	SNX8
P27348	P27348			14-3-3 protein theta	YWHAQ	14-3-3 protein T-cell; 14-3-3 protein tau; Protein HS1
P04899	P04899			Guanine nucleotide-binding protein G(i) subunit alpha-2	GNAI2	Adenylate cyclase-inhibiting G alpha protein; GNAI2B; GNAI2B; GNAI2B; GNAI2B; GNAI2B; GNAI2B
P21291	P21291			Cysteine and glycine-rich protein 1	CSRP1	Cysteine-rich protein 1; CRP; CRP1; Epididymis luminal protein 141; HEL-141; CSRP,; CSRP,; CSRP,
P46778	P46778			60S ribosomal protein L21	RPL21
P22314	P22314			Ubiquitin-like modifier-activating enzyme 1	UBA1	Protein A1S9; Ubiquitin-activating enzyme E1; A1S9T,; A1S9T,; A1S9T,
P12955	P12955			Xaa-Pro dipeptidase	PEPD	X-Pro dipeptidase; Imidodipeptidase; Peptidase D; Proline dipeptidase; Prolidase; PRD; PRD; PRD; PRD; PRD; PRD; PRD; PRD; PRD; PRD
O95861	O95861			3'(2'),5'-bisphosphate nucleotidase 1	BPNT1	Bisphosphate 3'-nucleotidase 1; PAP-inositol 1,4-phosphatase; PIP
O14556	O14556			Glyceraldehyde-3-phosphate dehydrogenase, testis-specific	GAPDHS	Spermatogenic cell-specific glyceraldehyde 3-phosphate dehydrogenase 2; GAPDH-2; Spermatogenic glyceraldehyde-3-phosphate dehydrogenase; GAPD2,; GAPD2,; GAPD2,; GAPD2,; GAPD2,
Q96KN1	Q96KN1			Protein FAM84B	FAM84B	Breast cancer membrane protein 101; Protein NSE2; BCMP101,
P62424	P62424			60S ribosomal protein L7a	RPL7A	PLA-X polypeptide; Surfeit locus protein 3; SURF-3,; SURF-3,; SURF-3,
Q9P289	Q9P289			Serine/threonine-protein kinase 26 {ECO:0000305}	STK26	MST3 and SOK1-related kinase {ECO:0000303|PubMed:11741893}; Mammalian STE20-like protein kinase 4 {ECO:0000303|PubMed:11641781}; MST-4 {ECO:0000305}; STE20-like kinase MST4 {ECO:0000305}; Serine/threonine-protein kinase MASK {ECO:0000305}; MASK; MASK; MASK; MASK; MASK; MASK; MASK; MASK; MASK; MASK; MASK; MASK
Q9UBC2	Q9UBC2			Epidermal growth factor receptor substrate 15-like 1	EPS15L1	Eps15-related protein; Eps15R; EPS15R; EPS15R; EPS15R; EPS15R
Q16363	Q16363			Laminin subunit alpha-4	LAMA4	Laminin-14 subunit alpha; Laminin-8 subunit alpha; Laminin-9 subunit alpha
P23634	P23634			Plasma membrane calcium-transporting ATPase 4 {ECO:0000305}	ATP2B4	PMCA4 {ECO:0000303|PubMed:1531651, ECO:0000312|EMBL:AAA50819.1}; Matrix-remodeling-associated protein 1; Plasma membrane calcium ATPase isoform 4; Plasma membrane calcium pump isoform 4; ATP2B2,; ATP2B2,; ATP2B2,; ATP2B2,; ATP2B2,; ATP2B2,; ATP2B2,; ATP2B2,
Q12905	Q12905			Interleukin enhancer-binding factor 2	ILF2	Nuclear factor of activated T-cells 45 kDa; NF45; NF45; NF45; NF45; NF45; NF45; NF45; NF45
P31150	P31150			Rab GDP dissociation inhibitor alpha	GDI1	Rab GDI alpha; Guanosine diphosphate dissociation inhibitor 1; GDI-1; Oligophrenin-2; Protein XAP-4; GDIL,; GDIL,; GDIL,; GDIL,; GDIL,; GDIL,; GDIL,
P04083	P04083			Annexin A1	ANXA1	Annexin I; Annexin-1; Calpactin II; Calpactin-2; Chromobindin-9; Lipocortin I {ECO:0000303|PubMed:1832554}; Phospholipase A2 inhibitory protein; p35; ANX1,
P25189	P25189			Myelin protein P0	MPZ	Myelin peripheral protein; MPP; Myelin protein zero
P13761	P13761			HLA class II histocompatibility antigen, DRB1-7 beta chain	HLA-DRB1	MHC class II antigen DRB1*7; DR-7; DR7
Q9H4M9	Q9H4M9			EH domain-containing protein 1 {ECO:0000305}	EHD1	PAST homolog 1 {ECO:0000303|PubMed:9253601}; hPAST1 {ECO:0000303|PubMed:9253601}; Testilin {ECO:0000312|EMBL:AAD45866.1}; PAST; PAST; PAST; PAST; PAST; PAST; PAST; PAST
Q9BXJ9	Q9BXJ9			N-alpha-acetyltransferase 15, NatA auxiliary subunit	NAA15	Gastric cancer antigen Ga19; N-terminal acetyltransferase; NMDA receptor-regulated protein 1; Protein tubedown-1; Tbdn100; GA19,; GA19,; GA19,; GA19,; GA19,; GA19,
P62158	P62158			Calmodulin	CALM1; CALM2; CALM3	CaM; CALM,; CALM,; CALM,; CALM,; CALM,; CALM,; CALM,; CALM,; CALM,; CALM,; CALM,; CALM,; CALM,; CALM,; CALM,; CALM,; CALM,; CALM,; CAM2,; CAM2,; CAM2,; CAM2,; CAM2,; CAM2,; CAM2,; CAM2,; CAM2,; CAM2,; CAM2,; CAM2,; CAM2,; CAM2,; CAM2,; CAM2,; CAM2,; CAM2,; CALML2,; CALML2,; CALML2,; CALML2,; CALML2,; CALML2,; CALML2,; CALML2,; CALML2,
P30153	P30153			Serine/threonine-protein phosphatase 2A 65 kDa regulatory subunit A alpha isoform	PPP2R1A	Medium tumor antigen-associated 61 kDa protein; PP2A subunit A isoform PR65-alpha; PP2A subunit A isoform R1-alpha
Q92616	Q92616			eIF-2-alpha kinase activator GCN1 {ECO:0000250|UniProtKB:E9PVA8}	GCN1	GCN1 eIF-2-alpha kinase activator homolog {ECO:0000312|HGNC:HGNC:4199}; GCN1-like protein 1 {ECO:0000250|UniProtKB:E9PVA8}; General control of amino-acid synthesis 1-like protein 1 {ECO:0000250|UniProtKB:E9PVA8}; Translational activator GCN1 {ECO:0000250|UniProtKB:E9PVA8}; HsGCN1; GCN1L1; GCN1L1; GCN1L1; GCN1L1; GCN1L1; GCN1L1; GCN1L1; GCN1L1; GCN1L1; GCN1L1
O75396	O75396			Vesicle-trafficking protein SEC22b	SEC22B	ER-Golgi SNARE of 24 kDa; ERS-24; ERS24; SEC22 vesicle-trafficking protein homolog B; SEC22 vesicle-trafficking protein-like 1; SEC22L1; SEC22L1
Q99471	Q99471			Prefoldin subunit 5	PFDN5	C-Myc-binding protein Mm-1; Myc modulator 1; MM1,; MM1,; MM1,; MM1,; MM1,
P10768	P10768			S-formylglutathione hydrolase	ESD	FGH; Esterase D; Methylumbelliferyl-acetate deacetylase
P37235	P37235			Hippocalcin-like protein 1	HPCAL1	Calcium-binding protein BDR-1; HLP2; Visinin-like protein 3; VILIP-3; BDR1; BDR1
P49321	P49321			Nuclear autoantigenic sperm protein	NASP	NASP
P67936	P67936			Tropomyosin alpha-4 chain	TPM4	TM30p1; Tropomyosin-4
Q9Y3L5	Q9Y3L5			Ras-related protein Rap-2c	RAP2C
Q71U36	Q71U36			Tubulin alpha-1A chain	TUBA1A	Alpha-tubulin 3; Tubulin B-alpha-1; Tubulin alpha-3 chain; TUBA3; TUBA3; TUBA3; TUBA3; TUBA3
O00625	O00625			Pirin	PIR	Probable quercetin 2,3-dioxygenase PIR; Probable quercetinase
Q969P0	Q969P0			Immunoglobulin superfamily member 8	IGSF8	IgSF8; CD81 partner 3; Glu-Trp-Ile EWI motif-containing protein 2; EWI-2; Keratinocytes-associated transmembrane protein 4; KCT-4; LIR-D1; Prostaglandin regulatory-like protein; PGRL; CD81P3,; CD81P3,; CD81P3,; CD81P3,
P63000	P63000			Ras-related C3 botulinum toxin substrate 1	RAC1	Cell migration-inducing gene 5 protein; Ras-like protein TC25; p21-Rac1; TC25; TC25; TC25; TC25; TC25; TC25
O00410	O00410			Importin-5	IPO5	Imp5; Importin subunit beta-3; Karyopherin beta-3; Ran-binding protein 5; RanBP5; KPNB3,; KPNB3,; KPNB3,; KPNB3,; KPNB3,
Q01105	Q01105			Protein SET	SET	HLA-DR-associated protein II; Inhibitor of granzyme A-activated DNase; IGAAD; PHAPII; Phosphatase 2A inhibitor I2PP2A; I-2PP2A; Template-activating factor I; TAF-I
P62826	P62826			GTP-binding nuclear protein Ran	RAN	Androgen receptor-associated protein 24; GTPase Ran; Ras-like protein TC4; Ras-related nuclear protein; ARA24; ARA24; ARA24; ARA24; ARA24; ARA24; ARA24; ARA24; ARA24; ARA24; ARA24; ARA24; ARA24
O14908	O14908			PDZ domain-containing protein GIPC1	GIPC1	GAIP C-terminus-interacting protein; RGS-GAIP-interacting protein; RGS19-interacting protein 1; Synectin; Tax interaction protein 2; TIP-2; C19orf3,; C19orf3,; C19orf3,; C19orf3,
P18085	P18085			ADP-ribosylation factor 4	ARF4	ARF2; ARF2; ARF2
P21796	P21796			Voltage-dependent anion-selective channel protein 1	VDAC1	VDAC-1; hVDAC1; Outer mitochondrial membrane protein porin 1; Plasmalemmal porin; Porin 31HL; Porin 31HM; VDAC; VDAC; VDAC; VDAC; VDAC; VDAC
P50454	P50454			Serpin H1	SERPINH1	47 kDa heat shock protein; Arsenic-transactivated protein 3; AsTP3; Cell proliferation-inducing gene 14 protein; Collagen-binding protein; Colligin; Rheumatoid arthritis-related antigen RA-A47; CBP1,; CBP1,; CBP1,; CBP1,; CBP1,; CBP1,; CBP1,
O14744	O14744			Protein arginine N-methyltransferase 5	PRMT5	72 kDa ICln-binding protein; Histone-arginine N-methyltransferase PRMT5; Jak-binding protein 1; Shk1 kinase-binding protein 1 homolog; SKB1 homolog; SKB1Hs; HRMT1L5,; HRMT1L5,; HRMT1L5,; HRMT1L5,; HRMT1L5,; HRMT1L5,; HRMT1L5,; HRMT1L5,; HRMT1L5,; HRMT1L5,
P01892	P01892			HLA class I histocompatibility antigen, A-2 alpha chain	HLA-A	MHC class I antigen A*2; HLAA; HLAA; HLAA; HLAA; HLAA; HLAA; HLAA; HLAA; HLAA; HLAA; HLAA; HLAA; HLAA; HLAA; HLAA; HLAA; HLAA; HLAA
P12268	P12268			Inosine-5'-monophosphate dehydrogenase 2 {ECO:0000255|HAMAP-Rule:MF_03156}	IMPDH2	IMP dehydrogenase 2 {ECO:0000255|HAMAP-Rule:MF_03156}; IMPD 2 {ECO:0000255|HAMAP-Rule:MF_03156}; IMPDH 2 {ECO:0000255|HAMAP-Rule:MF_03156}; IMPDH-II; IMPD2; IMPD2
Q92599	Q92599			Septin-8	SEPT8	KIAA0202; KIAA0202; KIAA0202; KIAA0202; KIAA0202; KIAA0202; KIAA0202
P27824	P27824			Calnexin	CANX	IP90; Major histocompatibility complex class I antigen-binding protein p88; p90
Q12765	Q12765			Secernin-1	SCRN1	KIAA0193; KIAA0193; KIAA0193; KIAA0193; KIAA0193; KIAA0193; KIAA0193
Q9UL26	Q9UL26			Ras-related protein Rab-22A	RAB22A	Rab-22; RAB22; RAB22; RAB22; RAB22; RAB22
P62879	P62879			Guanine nucleotide-binding protein G(I)/G(S)/G(T) subunit beta-2	GNB2	G protein subunit beta-2; Transducin beta chain 2
P40925	P40925			Malate dehydrogenase, cytoplasmic	MDH1	Cytosolic malate dehydrogenase; Diiodophenylpyruvate reductase; MDHA; MDHA; MDHA; MDHA; MDHA; MDHA
P04843	P04843			Dolichyl-diphosphooligosaccharide--protein glycosyltransferase subunit 1	RPN1	Dolichyl-diphosphooligosaccharide--protein glycosyltransferase 67 kDa subunit; Ribophorin I; RPN-I; Ribophorin-1
Q9P265	Q9P265			Disco-interacting protein 2 homolog B	DIP2B	DIP2 homolog B; KIAA1463; KIAA1463; KIAA1463; KIAA1463
Q9UJU6	Q9UJU6			Drebrin-like protein	DBNL	Cervical SH3P7; Cervical mucin-associated protein; Drebrin-F; HPK1-interacting protein of 55 kDa; HIP-55; SH3 domain-containing protein 7; CMAP,; CMAP,; CMAP,; CMAP,; CMAP,; CMAP,; CMAP,; CMAP,; CMAP,; CMAP,; CMAP,
Q9Y6M1	Q9Y6M1			Insulin-like growth factor 2 mRNA-binding protein 2	IGF2BP2	IGF2 mRNA-binding protein 2; IMP-2; Hepatocellular carcinoma autoantigen p62; IGF-II mRNA-binding protein 2; VICKZ family member 2; IMP2,; IMP2,; IMP2,; IMP2,; IMP2,
P62263	P62263			40S ribosomal protein S14	RPS14
P13645	P13645			Keratin, type I cytoskeletal 10	KRT10	Cytokeratin-10; CK-10; Keratin-10; K10; KPP; KPP; KPP
Q92974	Q92974			Rho guanine nucleotide exchange factor 2	ARHGEF2	Guanine nucleotide exchange factor H1; GEF-H1; Microtubule-regulated Rho-GEF; Proliferating cell nucleolar antigen p40; KIAA0651,; KIAA0651,; KIAA0651,; KIAA0651,; KIAA0651,; KIAA0651,; KIAA0651,; KIAA0651,
Q9BUF5	Q9BUF5			Tubulin beta-6 chain	TUBB6	Tubulin beta class V
P08174	P08174			Complement decay-accelerating factor	CD55	CR,; CR,; CR,; CR,; CR,; CR,; CR,; CR,; CR,; CR,; CR,; CR,
P62333	P62333			26S protease regulatory subunit 10B	PSMC6	26S proteasome AAA-ATPase subunit RPT4; Proteasome 26S subunit ATPase 6; Proteasome subunit p42; SUG2; SUG2; SUG2; SUG2; SUG2
P31946	P31946			14-3-3 protein beta/alpha	YWHAB	Protein 1054; Protein kinase C inhibitor protein 1; KCIP-1
Q9NPH3	Q9NPH3			Interleukin-1 receptor accessory protein	IL1RAP	IL-1 receptor accessory protein; IL-1RAcP; Interleukin-1 receptor 3; IL-1R-3; IL-1R3; C3orf13,; C3orf13,; C3orf13,; C3orf13,; C3orf13,
P26006	P26006			Integrin alpha-3	ITGA3	CD49 antigen-like family member C; FRP-2; Galactoprotein B3; GAPB3; VLA-3 subunit alpha; MSK18; MSK18; MSK18; MSK18; MSK18; MSK18
P05141	P05141			ADP/ATP translocase 2	SLC25A5	ADP,ATP carrier protein 2; ADP,ATP carrier protein, fibroblast isoform; Adenine nucleotide translocator 2; ANT 2; Solute carrier family 25 member 5; ANT2; ANT2; ANT2
P30566	P30566			Adenylosuccinate lyase {ECO:0000303|PubMed:8404037}	ADSL	ADSL {ECO:0000303|PubMed:8404037}; ASL; Adenylosuccinase {ECO:0000303|PubMed:9266401}; ASase; AMPS; AMPS; AMPS; AMPS
Q9H0H5	Q9H0H5			Rac GTPase-activating protein 1	RACGAP1	Male germ cell RacGap; MgcRacGAP; Protein CYK4 homolog; CYK4; HsCYK-4; KIAA1478; KIAA1478; KIAA1478; KIAA1478; KIAA1478
Q14344	Q14344			Guanine nucleotide-binding protein subunit alpha-13	GNA13	G alpha-13; G-protein subunit alpha-13
P60842	P60842			Eukaryotic initiation factor 4A-I	EIF4A1	eIF-4A-I; eIF4A-I; ATP-dependent RNA helicase eIF4A-1; DDX2A,; DDX2A,; DDX2A,; DDX2A,; DDX2A,; DDX2A,; DDX2A,
P23229	P23229			Integrin alpha-6	ITGA6	CD49 antigen-like family member F; VLA-6
Q9UKE5	Q9UKE5			TRAF2 and NCK-interacting protein kinase	TNIK	KIAA0551; KIAA0551; KIAA0551; KIAA0551; KIAA0551; KIAA0551; KIAA0551; KIAA0551; KIAA0551; KIAA0551; KIAA0551; KIAA0551; KIAA0551
O15554	O15554			Intermediate conductance calcium-activated potassium channel protein 4	KCNN4	SK4; SKCa 4; SKCa4; IKCa1; IK1; KCa3.1; KCa4; Putative Gardos channel; IK1,; IK1,
O00161	O00161			Synaptosomal-associated protein 23	SNAP23	SNAP-23; Vesicle-membrane fusion protein SNAP-23
O94804	O94804			Serine/threonine-protein kinase 10	STK10	Lymphocyte-oriented kinase; LOK; LOK; LOK; LOK; LOK; LOK
Q12913	Q12913			Receptor-type tyrosine-protein phosphatase eta	PTPRJ	Protein-tyrosine phosphatase eta; R-PTP-eta; Density-enhanced phosphatase 1; DEP-1; HPTP eta; Protein-tyrosine phosphatase receptor type J; R-PTP-J; DEP1; DEP1; DEP1; DEP1; DEP1
P46459	P46459			Vesicle-fusing ATPase	NSF	N-ethylmaleimide-sensitive fusion protein; NEM-sensitive fusion protein; Vesicular-fusion protein NSF
Q16576	Q16576			Histone-binding protein RBBP7	RBBP7	Histone acetyltransferase type B subunit 2; Nucleosome-remodeling factor subunit RBAP46; Retinoblastoma-binding protein 7; RBBP-7; Retinoblastoma-binding protein p46; RBAP46; RBAP46
P61981	P61981			14-3-3 protein gamma	YWHAG	Protein kinase C inhibitor protein 1; KCIP-1
O14979	O14979			Heterogeneous nuclear ribonucleoprotein D-like	HNRNPDL	hnRNP D-like; hnRNP DL; AU-rich element RNA-binding factor; JKT41-binding protein; Protein laAUF1; HNRPDL,; HNRPDL,; HNRPDL,; HNRPDL,; HNRPDL,; HNRPDL,
Q5T4S7	Q5T4S7			E3 ubiquitin-protein ligase UBR4	UBR4	600 kDa retinoblastoma protein-associated factor; N-recognin-4; RING-type E3 ubiquitin transferase UBR4; Retinoblastoma-associated factor of 600 kDa; RBAF600; p600; Zinc finger UBR1-type protein 1; KIAA0462,; KIAA0462,; KIAA0462,; KIAA0462,; KIAA0462,; KIAA0462,; KIAA0462,; KIAA0462,; KIAA0462,; KIAA0462,; KIAA0462,; KIAA0462,; KIAA0462,; KIAA0462,; KIAA0462,; KIAA0462,; KIAA0462,; KIAA0462,; KIA…
P25786	P25786			Proteasome subunit alpha type-1	PSMA1	30 kDa prosomal protein; PROS-30; Macropain subunit C2; Multicatalytic endopeptidase complex subunit C2; Proteasome component C2; Proteasome nu chain; HC2,; HC2,; HC2,; HC2,
Q6NZI2	Q6NZI2			Polymerase I and transcript release factor	PTRF	Cavin-1
Q13162	Q13162			Peroxiredoxin-4	PRDX4	Antioxidant enzyme AOE372; AOE37-2; Peroxiredoxin IV; Prx-IV; Thioredoxin peroxidase AO372; Thioredoxin-dependent peroxide reductase A0372
Q14697	Q14697			Neutral alpha-glucosidase AB	GANAB	Alpha-glucosidase 2; Glucosidase II subunit alpha; G2AN,; G2AN,; G2AN,; G2AN,
Q9NVD7	Q9NVD7			Alpha-parvin	PARVA	Actopaxin; CH-ILKBP; Calponin-like integrin-linked kinase-binding protein; Matrix-remodeling-associated protein 2; MXRA2; MXRA2; MXRA2
P10644	P10644			cAMP-dependent protein kinase type I-alpha regulatory subunit	PRKAR1A	Tissue-specific extinguisher 1; TSE1; PKR1,; PKR1,; PKR1,
P07437	P07437			Tubulin beta chain	TUBB	Tubulin beta-5 chain; TUBB5; TUBB5; TUBB5; TUBB5
P56537	P56537			Eukaryotic translation initiation factor 6 {ECO:0000255|HAMAP-Rule:MF_03132}	EIF6	eIF-6 {ECO:0000255|HAMAP-Rule:MF_03132}; B(2)GCN homolog; B4 integrin interactor; CAB; p27(BBP); EIF3A,; EIF3A,; EIF3A,; EIF3A,; EIF3A,; EIF3A,; EIF3A,; EIF3A,
O75054	O75054			Immunoglobulin superfamily member 3	IGSF3	IgSF3; Glu-Trp-Ile EWI motif-containing protein 3; EWI-3; EWI3,; EWI3,; EWI3,
P52735	P52735			Guanine nucleotide exchange factor VAV2	VAV2	VAV-2
O14617	O14617			AP-3 complex subunit delta-1	AP3D1	AP-3 complex subunit delta; Adaptor-related protein complex 3 subunit delta-1; Delta-adaptin
P49411	P49411			Elongation factor Tu, mitochondrial	TUFM	EF-Tu; P43
Q7L7X3	Q7L7X3			Serine/threonine-protein kinase TAO1	TAOK1	Kinase from chicken homolog B; hKFC-B; MARK Kinase; MARKK; Prostate-derived sterile 20-like kinase 2; PSK-2; PSK2; Prostate-derived STE20-like kinase 2; Thousand and one amino acid protein kinase 1; TAOK1; hTAOK1; KIAA1361,; KIAA1361,; KIAA1361,; KIAA1361,; KIAA1361,; KIAA1361,; KIAA1361,
Q9Y4I1	Q9Y4I1			Unconventional myosin-Va	MYO5A	Dilute myosin heavy chain, non-muscle; Myosin heavy chain 12; Myosin-12; Myoxin; MYH12; MYH12; MYH12; MYH12; MYH12; MYH12; MYH12
P49589	P49589			Cysteine--tRNA ligase, cytoplasmic	CARS	Cysteinyl-tRNA synthetase; CysRS
P62330	P62330			ADP-ribosylation factor 6	ARF6
P30044	P30044			Peroxiredoxin-5, mitochondrial	PRDX5	Alu corepressor 1; Antioxidant enzyme B166; AOEB166; Liver tissue 2D-page spot 71B; PLP; Peroxiredoxin V; Prx-V; Peroxisomal antioxidant enzyme; TPx type VI; Thioredoxin peroxidase PMP20; Thioredoxin reductase; ACR1; ACR1; ACR1; ACR1; ACR1; ACR1; ACR1; ACR1; ACR1; ACR1
P12081	P12081			Histidine--tRNA ligase, cytoplasmic	HARS	Histidyl-tRNA synthetase; HisRS; HRS; HRS; HRS; HRS; HRS
P30520	P30520			Adenylosuccinate synthetase isozyme 2 {ECO:0000255|HAMAP-Rule:MF_03127}	ADSS	AMPSase 2 {ECO:0000255|HAMAP-Rule:MF_03127}; AdSS 2 {ECO:0000255|HAMAP-Rule:MF_03127}; Adenylosuccinate synthetase, acidic isozyme {ECO:0000255|HAMAP-Rule:MF_03127}; Adenylosuccinate synthetase, liver isozyme {ECO:0000255|HAMAP-Rule:MF_03127}; L-type adenylosuccinate synthetase {ECO:0000255|HAMAP-Rule:MF_03127}; IMP--aspartate ligase 2 {ECO:0000255|HAMAP-Rule:MF_03127}; ADSS2; ADSS2; ADSS2
Q9HAV0	Q9HAV0			Guanine nucleotide-binding protein subunit beta-4	GNB4	Transducin beta chain 4
Q9Y230	Q9Y230			RuvB-like 2	RUVBL2	48 kDa TATA box-binding protein-interacting protein; 48 kDa TBP-interacting protein; 51 kDa erythrocyte cytosolic protein; ECP-51; INO80 complex subunit J; Repressing pontin 52; Reptin 52; TIP49b; TIP60-associated protein 54-beta; TAP54-beta; INO80J,; INO80J,; INO80J,; INO80J,; INO80J,; INO80J,
P17844	P17844			Probable ATP-dependent RNA helicase DDX5	DDX5	DEAD box protein 5; RNA helicase p68; G17P1,; G17P1,; G17P1,; G17P1,; G17P1,; G17P1,; G17P1,
P55884	P55884			Eukaryotic translation initiation factor 3 subunit B {ECO:0000255|HAMAP-Rule:MF_03001}	EIF3B	eIF3b {ECO:0000255|HAMAP-Rule:MF_03001}; Eukaryotic translation initiation factor 3 subunit 9 {ECO:0000255|HAMAP-Rule:MF_03001}; Prt1 homolog; hPrt1; eIF-3-eta {ECO:0000255|HAMAP-Rule:MF_03001}; eIF3 p110 {ECO:0000255|HAMAP-Rule:MF_03001}; eIF3 p116; EIF3S9; EIF3S9; EIF3S9; EIF3S9
P04075	P04075			Fructose-bisphosphate aldolase A	ALDOA	Lung cancer antigen NY-LU-1; Muscle-type aldolase; ALDA; ALDA; ALDA; ALDA; ALDA; ALDA; ALDA
P05023	P05023			Sodium/potassium-transporting ATPase subunit alpha-1	ATP1A1	Na(+)/K(+) ATPase alpha-1 subunit; Sodium pump subunit alpha-1
P02533	P02533			Keratin, type I cytoskeletal 14	KRT14	Cytokeratin-14; CK-14; Keratin-14; K14
P06737	P06737			Glycogen phosphorylase, liver form	PYGL
O15143	O15143			Actin-related protein 2/3 complex subunit 1B	ARPC1B	Arp2/3 complex 41 kDa subunit; p41-ARC; ARC41; ARC41
P15170	P15170			Eukaryotic peptide chain release factor GTP-binding subunit ERF3A	GSPT1	Eukaryotic peptide chain release factor subunit 3a; eRF3a; G1 to S phase transition protein 1 homolog; ERF3A; ERF3A; ERF3A
P62820	P62820			Ras-related protein Rab-1A	RAB1A	YPT1-related protein; RAB1; RAB1; RAB1; RAB1; RAB1
P23528	P23528			Cofilin-1	CFL1	18 kDa phosphoprotein; p18; Cofilin, non-muscle isoform; CFL; CFL; CFL; CFL
P19256	P19256			Lymphocyte function-associated antigen 3	CD58	Ag3; Surface glycoprotein LFA-3; LFA3; LFA3; LFA3; LFA3; LFA3
P61353	P61353			60S ribosomal protein L27	RPL27
P62277	P62277			40S ribosomal protein S13	RPS13
P35606	P35606			Coatomer subunit beta'	COPB2	Beta'-coat protein; Beta'-COP; p102
P00568	P00568			Adenylate kinase isoenzyme 1 {ECO:0000255|HAMAP-Rule:MF_03171}	AK1	AK 1 {ECO:0000255|HAMAP-Rule:MF_03171}; ATP-AMP transphosphorylase 1 {ECO:0000255|HAMAP-Rule:MF_03171}; ATP:AMP phosphotransferase {ECO:0000255|HAMAP-Rule:MF_03171}; Adenylate monophosphate kinase {ECO:0000255|HAMAP-Rule:MF_03171}; Myokinase {ECO:0000255|HAMAP-Rule:MF_03171}
Q93050	Q93050			V-type proton ATPase 116 kDa subunit a isoform 1	ATP6V0A1	V-ATPase 116 kDa isoform a1; Clathrin-coated vesicle/synaptic vesicle proton pump 116 kDa subunit; Vacuolar adenosine triphosphatase subunit Ac116; Vacuolar proton pump subunit 1; Vacuolar proton translocating ATPase 116 kDa subunit a isoform 1; ATP6N1,; ATP6N1,; ATP6N1,; ATP6N1,
P84085	P84085			ADP-ribosylation factor 5	ARF5
P62191	P62191			26S protease regulatory subunit 4	PSMC1	P26s4; 26S proteasome AAA-ATPase subunit RPT2; Proteasome 26S subunit ATPase 1
Q16851	Q16851			UTP--glucose-1-phosphate uridylyltransferase	UGP2	UDP-glucose pyrophosphorylase; UDPGP; UGPase; UGP1; UGP1; UGP1; UGP1; UGP1
P45974	P45974			Ubiquitin carboxyl-terminal hydrolase 5	USP5	Deubiquitinating enzyme 5; Isopeptidase T; Ubiquitin thioesterase 5; Ubiquitin-specific-processing protease 5; ISOT; ISOT; ISOT; ISOT
P84098	P84098			60S ribosomal protein L19	RPL19
P50995	P50995			Annexin A11	ANXA11	56 kDa autoantigen; Annexin XI; Annexin-11; Calcyclin-associated annexin 50; CAP-50; ANX11; ANX11
P05362	P05362			Intercellular adhesion molecule 1	ICAM1	ICAM-1; Major group rhinovirus receptor
O15067	O15067			Phosphoribosylformylglycinamidine synthase	PFAS	FGAM synthase; FGAMS; Formylglycinamide ribonucleotide amidotransferase; FGAR amidotransferase; FGAR-AT; Formylglycinamide ribotide amidotransferase; KIAA0361; KIAA0361
O43776	O43776			Asparagine--tRNA ligase, cytoplasmic	NARS	Asparaginyl-tRNA synthetase; AsnRS
P52907	P52907			F-actin-capping protein subunit alpha-1	CAPZA1	CapZ alpha-1
Q9UL46	Q9UL46			Proteasome activator complex subunit 2	PSME2	11S regulator complex subunit beta; REG-beta; Activator of multicatalytic protease subunit 2; Proteasome activator 28 subunit beta; PA28b; PA28beta
Q15019	Q15019			Septin-2	SEPT2	Neural precursor cell expressed developmentally down-regulated protein 5; NEDD-5; DIFF6,; DIFF6,; DIFF6,; DIFF6,; DIFF6,; DIFF6,
Q92597	Q92597			Protein NDRG1	NDRG1	Differentiation-related gene 1 protein; DRG-1; N-myc downstream-regulated gene 1 protein; Nickel-specific induction protein Cap43; Reducing agents and tunicamycin-responsive protein; RTP; Rit42; CAP43,; CAP43,; CAP43,; CAP43,; CAP43,; CAP43,; CAP43,
P34932	P34932			Heat shock 70 kDa protein 4	HSPA4	HSP70RY; Heat shock 70-related protein APG-2; APG2; APG2; APG2; APG2
O00505	O00505			Importin subunit alpha-4	KPNA3	Importin alpha Q2; Qip2; Karyopherin subunit alpha-3; SRP1-gamma; QIP2; QIP2; QIP2; QIP2; QIP2
P07858	P07858			Cathepsin B	CTSB	APP secretase; APPS; Cathepsin B1; CPSB; CPSB; CPSB; CPSB; CPSB
P52565	P52565			Rho GDP-dissociation inhibitor 1	ARHGDIA	Rho GDI 1; Rho-GDI alpha; GDIA1; GDIA1; GDIA1; GDIA1; GDIA1; GDIA1
P21281	P21281			V-type proton ATPase subunit B, brain isoform	ATP6V1B2	V-ATPase subunit B 2; Endomembrane proton pump 58 kDa subunit; HO57; Vacuolar proton pump subunit B 2; ATP6B2,; ATP6B2,; ATP6B2,; ATP6B2,; ATP6B2,; ATP6B2,
Q9NQ66	Q9NQ66			1-phosphatidylinositol 4,5-bisphosphate phosphodiesterase beta-1	PLCB1	PLC-154; Phosphoinositide phospholipase C-beta-1; Phospholipase C-I; PLC-I; Phospholipase C-beta-1; PLC-beta-1; KIAA0581; KIAA0581; KIAA0581; KIAA0581; KIAA0581; KIAA0581; KIAA0581; KIAA0581; KIAA0581; KIAA0581; KIAA0581; KIAA0581; KIAA0581; KIAA0581; KIAA0581; KIAA0581
Q9Y696	Q9Y696			Chloride intracellular channel protein 4	CLIC4	Intracellular chloride ion channel protein p64H1
P35998	P35998			26S protease regulatory subunit 7	PSMC2	26S proteasome AAA-ATPase subunit RPT1; Proteasome 26S subunit ATPase 2; Protein MSS1; MSS1; MSS1; MSS1; MSS1; MSS1
P47897	P47897			Glutamine--tRNA ligase	QARS	Glutaminyl-tRNA synthetase; GlnRS
P02768	P02768			Serum albumin	ALB
O75165	O75165			DnaJ homolog subfamily C member 13	DNAJC13	Required for receptor-mediated endocytosis 8; RME-8; KIAA0678,; KIAA0678,; KIAA0678,; KIAA0678,; KIAA0678,; KIAA0678,; KIAA0678,; KIAA0678,; KIAA0678,
P62269	P62269			40S ribosomal protein S18	RPS18	Ke-3; Ke3; D6S218E; D6S218E; D6S218E; D6S218E
P07237	P07237			Protein disulfide-isomerase	P4HB	PDI; Cellular thyroid hormone-binding protein; Prolyl 4-hydroxylase subunit beta; p55; ERBA2L,; ERBA2L,; ERBA2L,; ERBA2L,; ERBA2L,; ERBA2L,
P18433	P18433			Receptor-type tyrosine-protein phosphatase alpha	PTPRA	Protein-tyrosine phosphatase alpha; R-PTP-alpha; PTPA,; PTPA,; PTPA,; PTPA,; PTPA,; PTPA,
P61106	P61106			Ras-related protein Rab-14	RAB14
P27708	P27708			Name: Full=Dihydroorotase	CAD
P55209	P55209			Nucleosome assembly protein 1-like 1	NAP1L1	NAP-1-related protein; hNRP; NRP; NRP; NRP
Q13131	Q13131			5'-AMP-activated protein kinase catalytic subunit alpha-1	PRKAA1	AMPK subunit alpha-1; Acetyl-CoA carboxylase kinase; ACACA kinase; Hydroxymethylglutaryl-CoA reductase kinase; HMGCR kinase; Tau-protein kinase PRKAA1; AMPK1; AMPK1; AMPK1; AMPK1; AMPK1; AMPK1; AMPK1
Q03135	Q03135			Caveolin-1	CAV1	CAV; CAV; CAV; CAV
Q9UBQ0	Q9UBQ0			Vacuolar protein sorting-associated protein 29	VPS29	hVPS29; PEP11 homolog; Vesicle protein sorting 29
Q9UNF0	Q9UNF0			Protein kinase C and casein kinase substrate in neurons protein 2	PACSIN2	Syndapin-2; Syndapin-II
Q9H0U4	Q9H0U4			Ras-related protein Rab-1B	RAB1B
O00560	O00560			Syntenin-1	SDCBP	Melanoma differentiation-associated protein 9; MDA-9; Pro-TGF-alpha cytoplasmic domain-interacting protein 18; TACIP18; Scaffold protein Pbp1; Syndecan-binding protein 1; MDA9,; MDA9,; MDA9,; MDA9,; MDA9,; MDA9,; MDA9,
P54920	P54920			Alpha-soluble NSF attachment protein	NAPA	SNAP-alpha; N-ethylmaleimide-sensitive factor attachment protein alpha; SNAPA; SNAPA; SNAPA; SNAPA
O14936	O14936			Peripheral plasma membrane protein CASK	CASK	hCASK; Calcium/calmodulin-dependent serine protein kinase; Protein lin-2 homolog; LIN2; LIN2; LIN2; LIN2; LIN2; LIN2; LIN2; LIN2; LIN2; LIN2; LIN2; LIN2; LIN2; LIN2
P07195	P07195			L-lactate dehydrogenase B chain	LDHB	LDH-B; LDH heart subunit; LDH-H; Renal carcinoma antigen NY-REN-46
P12814	P12814			Alpha-actinin-1	ACTN1	Alpha-actinin cytoskeletal isoform; F-actin cross-linking protein; Non-muscle alpha-actinin-1
Q15758	Q15758			Neutral amino acid transporter B(0)	SLC1A5	ATB(0); Baboon M7 virus receptor; RD114/simian type D retrovirus receptor; Sodium-dependent neutral amino acid transporter type 2; Solute carrier family 1 member 5; ASCT2,; ASCT2,; ASCT2,; ASCT2,; ASCT2,; ASCT2,; ASCT2,; ASCT2,; ASCT2,; ASCT2,; ASCT2,
O14787	O14787			Transportin-2	TNPO2	Karyopherin beta-2b
Q9UKS6	Q9UKS6			Protein kinase C and casein kinase substrate in neurons protein 3	PACSIN3	SH3 domain-containing protein 6511
Q14232	Q14232			Translation initiation factor eIF-2B subunit alpha	EIF2B1	eIF-2B GDP-GTP exchange factor subunit alpha; EIF2BA; EIF2BA; EIF2BA; EIF2BA
P60709	P60709			Actin, cytoplasmic 1	ACTB	Beta-actin
P21926	P21926			CD9 antigen	CD9	5H9 antigen; Cell growth-inhibiting gene 2 protein; Leukocyte antigen MIC3; Motility-related protein; MRP-1; Tetraspanin-29; Tspan-29; p24; MIC3,; MIC3,; MIC3,; MIC3,
Q04637	Q04637			Eukaryotic translation initiation factor 4 gamma 1	EIF4G1	eIF-4-gamma 1; eIF-4G 1; eIF-4G1; p220; EIF4F,; EIF4F,; EIF4F,; EIF4F,; EIF4F,; EIF4F,; EIF4F,; EIF4F,; EIF4F,; EIF4F,; EIF4F,
Q9BTV4	Q9BTV4			Transmembrane protein 43	TMEM43	Protein LUMA
P20340	P20340			Ras-related protein Rab-6A	RAB6A	Rab-6; RAB6; RAB6; RAB6; RAB6; RAB6; RAB6; RAB6
Q92625	Q92625			Ankyrin repeat and SAM domain-containing protein 1A	ANKS1A	Odin; ANKS1,; ANKS1,; ANKS1,; ANKS1,; ANKS1,; ANKS1,
O14579	O14579			Coatomer subunit epsilon	COPE	Epsilon-coat protein; Epsilon-COP
P15559	P15559			NAD(P)H dehydrogenase [quinone] 1	NQO1	Azoreductase; DT-diaphorase; DTD; Menadione reductase; NAD(P)H:quinone oxidoreductase 1; Phylloquinone reductase; Quinone reductase 1; QR1; DIA4,; DIA4,; DIA4,; DIA4,; DIA4,
P23526	P23526			Adenosylhomocysteinase	AHCY	AdoHcyase; S-adenosyl-L-homocysteine hydrolase; SAHH; SAHH; SAHH; SAHH; SAHH; SAHH
Q14204	Q14204			Cytoplasmic dynein 1 heavy chain 1	DYNC1H1	Cytoplasmic dynein heavy chain 1; Dynein heavy chain, cytosolic; DHC1,; DHC1,; DHC1,; DHC1,; DHC1,; DHC1,
Q9HBA0	Q9HBA0			Transient receptor potential cation channel subfamily V member 4	TRPV4	TrpV4; Osm-9-like TRP channel 4; OTRPC4; Transient receptor potential protein 12; TRP12; Vanilloid receptor-like channel 2; Vanilloid receptor-like protein 2; VRL-2; Vanilloid receptor-related osmotically-activated channel; VR-OAC; VRL2,; VRL2,; VRL2,; VRL2,; VRL2,; VRL2,; VRL2,; VRL2,; VRL2,; VRL2,; VRL2,; VRL2,
P30050	P30050			60S ribosomal protein L12	RPL12
P43490	P43490			Nicotinamide phosphoribosyltransferase	NAMPT	NAmPRTase; Nampt; Pre-B-cell colony-enhancing factor 1; Pre-B cell-enhancing factor; Visfatin; PBEF,; PBEF,; PBEF,; PBEF,; PBEF,
Q9H2M9	Q9H2M9			Rab3 GTPase-activating protein non-catalytic subunit	RAB3GAP2	RGAP-iso; Rab3 GTPase-activating protein 150 kDa subunit; Rab3-GAP p150; Rab3-GAP150; Rab3-GAP regulatory subunit; KIAA0839; KIAA0839; KIAA0839; KIAA0839; KIAA0839; KIAA0839
P38646	P38646			Stress-70 protein, mitochondrial	HSPA9	75 kDa glucose-regulated protein; GRP-75; Heat shock 70 kDa protein 9; Mortalin; MOT; Peptide-binding protein 74; PBP74; GRP75,; GRP75,; GRP75,; GRP75,; GRP75,; GRP75,; GRP75,; GRP75,; GRP75,
Q92542	Q92542			Nicastrin	NCSTN	KIAA0253; KIAA0253; KIAA0253; KIAA0253
P07814	P07814			Name: Full=Proline--tRNA ligase	EPRS	Bifunctional aminoacyl-tRNA synthetase; Cell proliferation-inducing gene 32 protein; Glutamatyl-prolyl-tRNA synthetase; Glutamyl-tRNA synthetase; GluRS; Prolyl-tRNA synthetase; GLNS,; GLNS,; GLNS,; GLNS,; GLNS,; GLNS,; GLNS,; GLNS,; GLNS,
Q7L1Q6	Q7L1Q6			Basic leucine zipper and W2 domain-containing protein 1	BZW1	Protein Orf; BZAP45,; BZAP45,; BZAP45,; BZAP45,; BZAP45,; BZAP45,
P78539	P78539			Sushi repeat-containing protein SRPX	SRPX	ETX1; ETX1; ETX1; ETX1; ETX1; ETX1; ETX1; ETX1; ETX1; ETX1
Q15417	Q15417			Calponin-3	CNN3	Calponin, acidic isoform
P11166	P11166			Solute carrier family 2, facilitated glucose transporter member 1	SLC2A1	Glucose transporter type 1, erythrocyte/brain; GLUT-1; HepG2 glucose transporter; GLUT1; GLUT1; GLUT1; GLUT1; GLUT1; GLUT1
O00425	O00425			Insulin-like growth factor 2 mRNA-binding protein 3	IGF2BP3	IGF2 mRNA-binding protein 3; IMP-3; IGF-II mRNA-binding protein 3; KH domain-containing protein overexpressed in cancer; hKOC; VICKZ family member 3; IMP3,; IMP3,; IMP3,; IMP3,; IMP3,
Q15293	Q15293			Reticulocalbin-1	RCN1	RCN; RCN; RCN
O60888	O60888			Protein CutA	CUTA	Acetylcholinesterase-associated protein; Brain acetylcholinesterase putative membrane anchor; ACHAP,; ACHAP,; ACHAP,; ACHAP,; ACHAP,; ACHAP,; ACHAP,
Q92841	Q92841			Probable ATP-dependent RNA helicase DDX17	DDX17	DEAD box protein 17; DEAD box protein p72; RNA-dependent helicase p72
P06576	P06576			ATP synthase subunit beta, mitochondrial	ATP5B	ATPMB,; ATPMB,; ATPMB,
P09211	P09211			Glutathione S-transferase P	GSTP1	GST class-pi; GSTP1-1; FAEES3,; FAEES3,; FAEES3,; FAEES3,
P08758	P08758			Annexin A5	ANXA5	Anchorin CII; Annexin V; Annexin-5; Calphobindin I; CBP-I; Endonexin II; Lipocortin V; Placental anticoagulant protein 4; PP4; Placental anticoagulant protein I; PAP-I; Thromboplastin inhibitor; Vascular anticoagulant-alpha; VAC-alpha; ANX5,; ANX5,; ANX5,; ANX5,; ANX5,; ANX5,
Q9HDC9	Q9HDC9			Adipocyte plasma membrane-associated protein	APMAP	Protein BSCv; C20orf3; C20orf3; C20orf3; C20orf3; C20orf3; C20orf3
Q6UVK1	Q6UVK1			Chondroitin sulfate proteoglycan 4	CSPG4	Chondroitin sulfate proteoglycan NG2; Melanoma chondroitin sulfate proteoglycan; Melanoma-associated chondroitin sulfate proteoglycan; MCSP; MCSP; MCSP
O60814	O60814			Histone H2B type 1-K	HIST1H2BK	H2B K; HIRA-interacting protein 1; H2BFT,; H2BFT,; H2BFT,
P50281	P50281			Matrix metalloproteinase-14	MMP14	MMP-14; MMP-X1; Membrane-type matrix metalloproteinase 1; MT-MMP 1; MTMMP1; Membrane-type-1 matrix metalloproteinase; MT1-MMP; MT1MMP
P51665	P51665			26S proteasome non-ATPase regulatory subunit 7	PSMD7	26S proteasome regulatory subunit RPN8; 26S proteasome regulatory subunit S12; Mov34 protein homolog; Proteasome subunit p40; MOV34L; MOV34L; MOV34L; MOV34L
P36551	P36551			Oxygen-dependent coproporphyrinogen-III oxidase, mitochondrial	CPOX	COX; Coprogen oxidase; Coproporphyrinogenase; CPO,; CPO,; CPO,; CPO,; CPO,; CPO,; CPO,
P23246	P23246			Splicing factor, proline- and glutamine-rich	SFPQ	100 kDa DNA-pairing protein; hPOMp100; DNA-binding p52/p100 complex, 100 kDa subunit; Polypyrimidine tract-binding protein-associated-splicing factor {ECO:0000303|PubMed:9848648}; PSF {ECO:0000303|PubMed:8449401}; PTB-associated-splicing factor; PSF; PSF; PSF
O75955	O75955			Flotillin-1	FLOT1
Q13838	Q13838			Spliceosome RNA helicase DDX39B	DDX39B	56 kDa U2AF65-associated protein; ATP-dependent RNA helicase p47; DEAD box protein UAP56; HLA-B-associated transcript 1 protein; BAT1,; BAT1,; BAT1,; BAT1,; BAT1,; BAT1,; BAT1,; BAT1,; BAT1,; BAT1,; BAT1,; BAT1,; BAT1,; BAT1,; BAT1,; BAT1,; BAT1,; BAT1,
Q9NUQ9	Q9NUQ9			Protein FAM49B	FAM49B	L1
P35580	P35580			Myosin-10	MYH10	Cellular myosin heavy chain, type B; Myosin heavy chain 10; Myosin heavy chain, non-muscle IIb; Non-muscle myosin heavy chain B; NMMHC-B; Non-muscle myosin heavy chain IIb; NMMHC II-b; NMMHC-IIB
Q9HB71	Q9HB71			Calcyclin-binding protein	CACYBP	CacyBP; hCacyBP; S100A6-binding protein; Siah-interacting protein; S100A6BP,; S100A6BP,; S100A6BP,; S100A6BP,; S100A6BP,; S100A6BP,
O15031	O15031			Plexin-B2	PLXNB2	MM1; KIAA0315; KIAA0315; KIAA0315; KIAA0315
P42025	P42025			Beta-centractin	ACTR1B	Actin-related protein 1B; ARP1B; CTRN2; CTRN2; CTRN2; CTRN2
O60884	O60884			DnaJ homolog subfamily A member 2	DNAJA2	Cell cycle progression restoration gene 3 protein; Dnj3; Dj3; HIRA-interacting protein 4; Renal carcinoma antigen NY-REN-14; CPR3,; CPR3,; CPR3,
Q9Y6B6	Q9Y6B6			GTP-binding protein SAR1b	SAR1B	GTP-binding protein B; GTBPB; SARA2,; SARA2,; SARA2,
Q9BRA2	Q9BRA2			Thioredoxin domain-containing protein 17	TXNDC17	14 kDa thioredoxin-related protein; TRP14; Protein 42-9-9; Thioredoxin-like protein 5; TXNL5; TXNL5
Q15404	Q15404			Ras suppressor protein 1	RSU1	RSP-1; Rsu-1; RSP1; RSP1; RSP1; RSP1
Q96C19	Q96C19			EF-hand domain-containing protein D2	EFHD2	Swiprosin-1; SWS1; SWS1
Q92888	Q92888			Rho guanine nucleotide exchange factor 1	ARHGEF1	115 kDa guanine nucleotide exchange factor; p115-RhoGEF; p115RhoGEF; Sub1.5
P22061	P22061			Protein-L-isoaspartate(D-aspartate) O-methyltransferase	PCMT1	PIMT; L-isoaspartyl protein carboxyl methyltransferase; Protein L-isoaspartyl/D-aspartyl methyltransferase; Protein-beta-aspartate methyltransferase
Q9BQE3	Q9BQE3			Tubulin alpha-1C chain	TUBA1C	Alpha-tubulin 6; Tubulin alpha-6 chain; TUBA6
Q9ULZ3	Q9ULZ3			Apoptosis-associated speck-like protein containing a CARD	PYCARD	hASC; Caspase recruitment domain-containing protein 5; PYD and CARD domain-containing protein; Target of methylation-induced silencing 1; ASC,; ASC,; ASC,; ASC,; ASC,
P54136	P54136			Arginine--tRNA ligase, cytoplasmic	RARS	Arginyl-tRNA synthetase; ArgRS
P06753	P06753			Tropomyosin alpha-3 chain	TPM3	Gamma-tropomyosin; Tropomyosin-3; Tropomyosin-5; hTM5
Q9NQR4	Q9NQR4			Omega-amidase NIT2	NIT2	Nitrilase homolog 2
P54819	P54819			Adenylate kinase 2, mitochondrial {ECO:0000255|HAMAP-Rule:MF_03168}	AK2	AK 2 {ECO:0000255|HAMAP-Rule:MF_03168}; ATP-AMP transphosphorylase 2 {ECO:0000255|HAMAP-Rule:MF_03168}; ATP:AMP phosphotransferase {ECO:0000255|HAMAP-Rule:MF_03168}; Adenylate monophosphate kinase {ECO:0000255|HAMAP-Rule:MF_03168}; ADK2; ADK2; ADK2; ADK2; ADK2; ADK2; ADK2; ADK2; ADK2
Q9UNH7	Q9UNH7			Sorting nexin-6	SNX6	TRAF4-associated factor 2
Q96J02	Q96J02			E3 ubiquitin-protein ligase Itchy homolog	ITCH	Itch; Atrophin-1-interacting protein 4; AIP4; HECT-type E3 ubiquitin transferase Itchy homolog; NFE2-associated polypeptide 1; NAPP1
Q8WTV0	Q8WTV0			Scavenger receptor class B member 1	SCARB1	SRB1; CD36 and LIMPII analogous 1; CLA-1; CD36 antigen-like 1; Collagen type I receptor, thrombospondin receptor-like 1; SR-BI; CD36L1,; CD36L1,; CD36L1,; CD36L1,; CD36L1,
O95336	O95336			6-phosphogluconolactonase	PGLS	6PGL
P04264	P04264			Keratin, type II cytoskeletal 1	KRT1	67 kDa cytokeratin; Cytokeratin-1; CK-1; Hair alpha protein; Keratin-1; K1; Type-II keratin Kb1; KRTA; KRTA; KRTA; KRTA; KRTA; KRTA; KRTA
Q00796	Q00796			Sorbitol dehydrogenase	SORD	L-iditol 2-dehydrogenase
P08238	P08238			Heat shock protein HSP 90-beta	HSP90AB1	HSP 90; Heat shock 84 kDa; HSP 84; HSP84; HSP90B,; HSP90B,; HSP90B,; HSP90B,; HSP90B,
Q15286	Q15286			Ras-related protein Rab-35	RAB35	GTP-binding protein RAY; Ras-related protein Rab-1C; RAB1C,; RAB1C,; RAB1C,
P07203	P07203			Glutathione peroxidase 1	GPX1	GPx-1; GSHPx-1; Cellular glutathione peroxidase
Q12979	Q12979			Active breakpoint cluster region-related protein	ABR
P13797	P13797			Plastin-3	PLS3	T-plastin
Q8IYI6	Q8IYI6			Exocyst complex component 8	EXOC8	Exocyst complex 84 kDa subunit
Q01650	Q01650			Large neutral amino acids transporter small subunit 1	SLC7A5	4F2 light chain; 4F2 LC; 4F2LC; CD98 light chain; Integral membrane protein E16; L-type amino acid transporter 1; hLAT1; Solute carrier family 7 member 5; y+ system cationic amino acid transporter; CD98LC,; CD98LC,; CD98LC,; CD98LC,; CD98LC,
Q9BR76	Q9BR76			Coronin-1B	CORO1B	Coronin-2
Q9Y639	Q9Y639			Neuroplastin	NPTN	Stromal cell-derived receptor 1; SDR-1; SDFR1,; SDFR1,; SDFR1,; SDFR1,; SDFR1,; SDFR1,; SDFR1,; SDFR1,
Q86W92	Q86W92			Liprin-beta-1	PPFIBP1	Protein tyrosine phosphatase receptor type f polypeptide-interacting protein-binding protein 1; PTPRF-interacting protein-binding protein 1; hSGT2; KIAA1230; KIAA1230; KIAA1230; KIAA1230; KIAA1230
Q06323	Q06323			Proteasome activator complex subunit 1	PSME1	11S regulator complex subunit alpha; REG-alpha; Activator of multicatalytic protease subunit 1; Interferon gamma up-regulated I-5111 protein; IGUP I-5111; Proteasome activator 28 subunit alpha; PA28a; PA28alpha; IFI5111; IFI5111; IFI5111; IFI5111; IFI5111
P31939	P31939			Name: Full=IMP cyclohydrolase	ATIC	5-aminoimidazole-4-carboxamide ribonucleotide formyltransferase; AICAR transformylase; ATIC; IMP synthase; Inosinicase; PURH; PURH; PURH; PURH; PURH
P30041	P30041			Peroxiredoxin-6	PRDX6	1-Cys peroxiredoxin; 1-Cys PRX; 24 kDa protein; Acidic calcium-independent phospholipase A2; aiPLA2; Antioxidant protein 2; Liver 2D page spot 40; Non-selenium glutathione peroxidase; NSGPx; Red blood cells page spot 12; AOP2,; AOP2,; AOP2,; AOP2,; AOP2,
P11234	P11234			Ras-related protein Ral-B	RALB
P63104	P63104			14-3-3 protein zeta/delta	YWHAZ	Protein kinase C inhibitor protein 1; KCIP-1
P15311	P15311			Ezrin	EZR	Cytovillin; Villin-2; p81; VIL2; VIL2; VIL2; VIL2; VIL2; VIL2
P02649	P02649			Apolipoprotein E	APOE	Apo-E
P19338	P19338			Nucleolin	NCL	Protein C23
P20618	P20618			Proteasome subunit beta type-1	PSMB1	Macropain subunit C5; Multicatalytic endopeptidase complex subunit C5; Proteasome component C5; Proteasome gamma chain; PSC5; PSC5; PSC5
P47895	P47895			Aldehyde dehydrogenase family 1 member A3	ALDH1A3	Aldehyde dehydrogenase 6; Retinaldehyde dehydrogenase 3; RALDH-3; RalDH3; ALDH6; ALDH6
P48735	P48735			Isocitrate dehydrogenase [NADP], mitochondrial	IDH2	IDH; ICD-M; IDP; NADP(+)-specific ICDH; Oxalosuccinate decarboxylase
O76094	O76094			Signal recognition particle subunit SRP72	SRP72	SRP72; Signal recognition particle 72 kDa protein
P09972	P09972			Fructose-bisphosphate aldolase C	ALDOC	Brain-type aldolase; ALDC; ALDC; ALDC; ALDC; ALDC
Q7RTP6	Q7RTP6			[F-actin]-methionine sulfoxide oxidase MICAL3	MICAL3	Molecule interacting with CasL protein 3; MICAL-3; KIAA0819,; KIAA0819,; KIAA0819,; KIAA0819,; KIAA0819,; KIAA0819,; KIAA0819,; KIAA0819,
Q92734	Q92734			Protein TFG	TFG	TRK-fused gene protein
P61158	P61158			Actin-related protein 3	ACTR3	Actin-like protein 3; ARP3; ARP3; ARP3
P60953	P60953			Cell division control protein 42 homolog	CDC42	G25K GTP-binding protein
Q14699	Q14699			Raftlin	RFTN1	Cell migration-inducing gene 2 protein; Raft-linking protein; KIAA0084; KIAA0084; KIAA0084; KIAA0084; KIAA0084; KIAA0084
P56199	P56199			Integrin alpha-1	ITGA1	CD49 antigen-like family member A; Laminin and collagen receptor; VLA-1
P46940	P46940			Ras GTPase-activating-like protein IQGAP1	IQGAP1	p195; KIAA0051; KIAA0051
P37837	P37837			Transaldolase	TALDO1	TAL,; TAL,; TAL,; TAL,; TAL,
P25789	P25789			Proteasome subunit alpha type-4	PSMA4	Macropain subunit C9; Multicatalytic endopeptidase complex subunit C9; Proteasome component C9; Proteasome subunit L; HC9,; HC9,; HC9,; HC9,; HC9,
Q96C86	Q96C86			m7GpppX diphosphatase	DCPS	DCS-1; Decapping scavenger enzyme; Hint-related 7meGMP-directed hydrolase; Histidine triad nucleotide-binding protein 5; Histidine triad protein member 5; HINT-5; Scavenger mRNA-decapping enzyme DcpS; DCS1,; DCS1,; DCS1,
P17987	P17987			T-complex protein 1 subunit alpha	TCP1	TCP-1-alpha; CCT-alpha; CCT1,; CCT1,; CCT1,; CCT1,
P35908	P35908			Keratin, type II cytoskeletal 2 epidermal	KRT2	Cytokeratin-2e; CK-2e; Epithelial keratin-2e; Keratin-2 epidermis; Keratin-2e; K2e; Type-II keratin Kb2; KRT2A,; KRT2A,
P06744	P06744			Glucose-6-phosphate isomerase	GPI	GPI; Autocrine motility factor; AMF; Neuroleukin; NLK; Phosphoglucose isomerase; PGI; Phosphohexose isomerase; PHI; Sperm antigen 36; SA-36
P25788	P25788			Proteasome subunit alpha type-3	PSMA3	Macropain subunit C8; Multicatalytic endopeptidase complex subunit C8; Proteasome component C8; HC8,; HC8,; HC8,; HC8,; HC8,
P14625	P14625			Endoplasmin	HSP90B1	94 kDa glucose-regulated protein; GRP-94; Heat shock protein 90 kDa beta member 1; Tumor rejection antigen 1; gp96 homolog; GRP94,; GRP94,
P04844	P04844			Dolichyl-diphosphooligosaccharide--protein glycosyltransferase subunit 2	RPN2	Dolichyl-diphosphooligosaccharide--protein glycosyltransferase 63 kDa subunit; RIBIIR; Ribophorin II; RPN-II; Ribophorin-2
P62195	P62195			26S protease regulatory subunit 8	PSMC5	26S proteasome AAA-ATPase subunit RPT6; Proteasome 26S subunit ATPase 5; Proteasome subunit p45; Thyroid hormone receptor-interacting protein 1; TRIP1; p45/SUG; SUG1; SUG1; SUG1; SUG1; SUG1; SUG1; SUG1; SUG1
O15372	O15372			Eukaryotic translation initiation factor 3 subunit H {ECO:0000255|HAMAP-Rule:MF_03007}	EIF3H	eIF3h {ECO:0000255|HAMAP-Rule:MF_03007}; Eukaryotic translation initiation factor 3 subunit 3 {ECO:0000255|HAMAP-Rule:MF_03007}; eIF-3-gamma; eIF3 p40 subunit {ECO:0000255|HAMAP-Rule:MF_03007}; EIF3S3
Q9UHD8	Q9UHD8			Septin-9	SEPT9	MLL septin-like fusion protein MSF-A; MLL septin-like fusion protein; Ovarian/Breast septin; Ov/Br septin; Septin D1; KIAA0991,; KIAA0991,; KIAA0991,; KIAA0991,; KIAA0991,; KIAA0991,; KIAA0991,; KIAA0991,; KIAA0991,; KIAA0991,; KIAA0991,; KIAA0991,; KIAA0991,
Q12906	Q12906			Interleukin enhancer-binding factor 3	ILF3	Double-stranded RNA-binding protein 76; DRBP76; M-phase phosphoprotein 4; MPP4; Nuclear factor associated with dsRNA; NFAR; Nuclear factor of activated T-cells 90 kDa; NF-AT-90; Translational control protein 80; TCP80; DRBF,; DRBF,; DRBF,; DRBF,; DRBF,; DRBF,; DRBF,; DRBF,; DRBF,; DRBF,; DRBF,; DRBF,; DRBF,; DRBF,; DRBF,; DRBF,; DRBF,; DRBF,; DRBF,; DRBF,; DRBF,; DRBF,; DRBF,; DRBF,; DRBF,
O43390	O43390			Heterogeneous nuclear ribonucleoprotein R	HNRNPR	hnRNP R; HNRPR; HNRPR; HNRPR; HNRPR; HNRPR
Q9GZS3	Q9GZS3			WD repeat-containing protein 61	WDR61	Meiotic recombination REC14 protein homolog; SKI8 homolog; Ski8
Q9H223	Q9H223			EH domain-containing protein 4 {ECO:0000305}	EHD4	Hepatocellular carcinoma-associated protein 10/11 {ECO:0000303|PubMed:12097419}; PAST homolog 4 {ECO:0000305}; HCA10; HCA10; HCA10; HCA10; HCA10; HCA10; HCA10; HCA10; HCA10; HCA10; HCA10; HCA10
Q15907	Q15907			Ras-related protein Rab-11B	RAB11B	GTP-binding protein YPT3; YPT3; YPT3; YPT3; YPT3; YPT3; YPT3; YPT3; YPT3; YPT3; YPT3
P61160	P61160			Actin-related protein 2	ACTR2	Actin-like protein 2; ARP2; ARP2; ARP2; ARP2; ARP2; ARP2
P08243	P08243			Asparagine synthetase [glutamine-hydrolyzing]	ASNS	Cell cycle control protein TS11; Glutamine-dependent asparagine synthetase; TS11; TS11; TS11; TS11; TS11; TS11; TS11; TS11; TS11; TS11; TS11
P54578	P54578			Ubiquitin carboxyl-terminal hydrolase 14	USP14	Deubiquitinating enzyme 14; Ubiquitin thioesterase 14; Ubiquitin-specific-processing protease 14; TGT; TGT; TGT; TGT
Q9C0D5	Q9C0D5			Protein TANC1	TANC1	Tetratricopeptide repeat, ankyrin repeat and coiled-coil domain-containing protein 1; KIAA1728; KIAA1728; KIAA1728
P20020	P20020			Plasma membrane calcium-transporting ATPase 1	ATP2B1	PMCA1; Plasma membrane calcium ATPase isoform 1; Plasma membrane calcium pump isoform 1; PMCA1; PMCA1; PMCA1; PMCA1; PMCA1; PMCA1; PMCA1; PMCA1
P62937	P62937			Peptidyl-prolyl cis-trans isomerase A	PPIA	PPIase A; Cyclophilin A; Cyclosporin A-binding protein; Rotamase A; CYPA; CYPA; CYPA; CYPA; CYPA; CYPA; CYPA; CYPA; CYPA; CYPA
P60228	P60228			Eukaryotic translation initiation factor 3 subunit E {ECO:0000255|HAMAP-Rule:MF_03004}	EIF3E	eIF3e {ECO:0000255|HAMAP-Rule:MF_03004}; Eukaryotic translation initiation factor 3 subunit 6 {ECO:0000255|HAMAP-Rule:MF_03004}; Viral integration site protein INT-6 homolog; eIF-3 p48 {ECO:0000255|HAMAP-Rule:MF_03004}; EIF3S6; EIF3S6; EIF3S6; EIF3S6; EIF3S6; EIF3S6; EIF3S6; EIF3S6; EIF3S6; EIF3S6; EIF3S6; EIF3S6; EIF3S6; EIF3S6
P15121	P15121			Aldose reductase	AKR1B1	AR; Aldehyde reductase; Aldo-keto reductase family 1 member B1; ALDR1; ALDR1; ALDR1; ALDR1; ALDR1; ALDR1; ALDR1
Q7Z3E5	Q7Z3E5			LisH domain-containing protein ARMC9	ARMC9	Melanoma/melanocyte-specific tumor antigen KU-MEL-1; NS21; KIAA1868; KIAA1868; KIAA1868; KIAA1868; KIAA1868; KIAA1868; KIAA1868
P61978	P61978			Heterogeneous nuclear ribonucleoprotein K	HNRNPK	hnRNP K; Transformation up-regulated nuclear protein; TUNP; HNRPK; HNRPK; HNRPK; HNRPK; HNRPK; HNRPK; HNRPK; HNRPK
P62249	P62249			40S ribosomal protein S16	RPS16
P02786	P02786			Transferrin receptor protein 1	TFRC	TR; TfR; TfR1; Trfr; T9; p90
Q27J81	Q27J81			Inverted formin-2	INF2	HBEBP2-binding protein C; C14orf151,; C14orf151,; C14orf151,; C14orf151,; C14orf151,; C14orf151,; C14orf151,; C14orf151,
O95394	O95394			Phosphoacetylglucosamine mutase {ECO:0000305}	PGM3	PAGM; Acetylglucosamine phosphomutase {ECO:0000305}; N-acetylglucosamine-phosphate mutase {ECO:0000303|PubMed:10721701}; Phosphoglucomutase-3 {ECO:0000312|HGNC:HGNC:8907}; PGM 3; AGM1; AGM1; AGM1; AGM1; AGM1; AGM1; AGM1; AGM1; AGM1; AGM1; AGM1; AGM1; AGM1
P24821	P24821			Tenascin	TNC	TN; Cytotactin; GMEM; GP 150-225; Glioma-associated-extracellular matrix antigen; Hexabrachion; JI; Myotendinous antigen; Neuronectin; Tenascin-C; TN-C; HXB; HXB; HXB; HXB; HXB; HXB; HXB; HXB
P01112	P01112			GTPase HRas	HRAS	H-Ras-1; Ha-Ras; Transforming protein p21; c-H-ras; p21ras; HRAS1; HRAS1; HRAS1; HRAS1; HRAS1; HRAS1
P62917	P62917			60S ribosomal protein L8	RPL8
P17931	P17931			Galectin-3	LGALS3	Gal-3; 35 kDa lectin; Carbohydrate-binding protein 35; CBP 35; Galactose-specific lectin 3; Galactoside-binding protein; GALBP; IgE-binding protein; L-31; Laminin-binding protein; Lectin L-29; Mac-2 antigen; MAC2; MAC2; MAC2; MAC2; MAC2
Q8WWM9	Q8WWM9			Cytoglobin	CYGB	Histoglobin; HGb; Stellate cell activation-associated protein; STAP; STAP; STAP
Q13185	Q13185			Chromobox protein homolog 3	CBX3	HECH; Heterochromatin protein 1 homolog gamma; HP1 gamma; Modifier 2 protein
Q14644	Q14644			Ras GTPase-activating protein 3	RASA3	GAP1(IP4BP); Ins P4-binding protein
P67775	P67775			Serine/threonine-protein phosphatase 2A catalytic subunit alpha isoform	PPP2CA	PP2A-alpha; Replication protein C; RP-C
P49915	P49915			GMP synthase [glutamine-hydrolyzing]	GMPS	GMP synthetase; Glutamine amidotransferase
P53990	P53990			IST1 homolog	IST1	hIST1; Putative MAPK-activating protein PM28; KIAA0174; KIAA0174; KIAA0174; KIAA0174; KIAA0174; KIAA0174
P46939	P46939			Utrophin	UTRN	Dystrophin-related protein 1; DRP-1; DMDL,; DMDL,; DMDL,; DMDL,
Q9NRV9	Q9NRV9			Heme-binding protein 1	HEBP1	p22HBP; HBP; HBP; HBP
Q9Y653	Q9Y653			Adhesion G-protein coupled receptor G1	ADGRG1	G-protein coupled receptor 56; Protein TM7XN1; GPR56,; GPR56,; GPR56,; GPR56,; GPR56,; GPR56,; GPR56,; GPR56,; GPR56,
P32969	P32969			60S ribosomal protein L9	RPL9; RPL9P7; RPL9P8; RPL9P9
P28062	P28062			Proteasome subunit beta type-8	PSMB8	Low molecular mass protein 7; Macropain subunit C13; Multicatalytic endopeptidase complex subunit C13; Proteasome component C13; Proteasome subunit beta-5i; Really interesting new gene 10 protein; LMP7,; LMP7,; LMP7,; LMP7,; LMP7,; LMP7,
P62873	P62873			Guanine nucleotide-binding protein G(I)/G(S)/G(T) subunit beta-1	GNB1	Transducin beta chain 1
P61019	P61019			Ras-related protein Rab-2A	RAB2A	RAB2; RAB2; RAB2; RAB2
Q9P0V9	Q9P0V9			Septin-10	SEPT10
P11940	P11940			Polyadenylate-binding protein 1	PABPC1	PABP-1; Poly(A)-binding protein 1; PAB1,; PAB1,; PAB1,
P19022	P19022			Cadherin-2	CDH2	CDw325; Neural cadherin; N-cadherin; CDHN,; CDHN,; CDHN,; CDHN,; CDHN,
Q13884	Q13884			Beta-1-syntrophin	SNTB1	59 kDa dystrophin-associated protein A1 basic component 1; DAPA1B; BSYN2; Syntrophin-2; Tax interaction protein 43; TIP-43; SNT2B1; SNT2B1; SNT2B1; SNT2B1
P62888	P62888			60S ribosomal protein L30	RPL30
P05090	P05090			Apolipoprotein D	APOD	Apo-D; ApoD
P78324	P78324			Tyrosine-protein phosphatase non-receptor type substrate 1	SIRPA	SHP substrate 1; SHPS-1; Brain Ig-like molecule with tyrosine-based activation motifs; Bit; CD172 antigen-like family member A; Inhibitory receptor SHPS-1; Macrophage fusion receptor; MyD-1 antigen; Signal-regulatory protein alpha-1; Sirp-alpha-1; Signal-regulatory protein alpha-2; Sirp-alpha-2; Signal-regulatory protein alpha-3; Sirp-alpha-3; p84; BIT,; BIT,; BIT,; BIT,; BIT,; BIT,; BIT,; BIT,; …
P62266	P62266			40S ribosomal protein S23	RPS23
Q9UHN6	Q9UHN6			Transmembrane protein 2	TMEM2	KIAA1412; KIAA1412; KIAA1412; KIAA1412; KIAA1412; KIAA1412; KIAA1412; KIAA1412; KIAA1412
P20042	P20042			Eukaryotic translation initiation factor 2 subunit 2	EIF2S2	Eukaryotic translation initiation factor 2 subunit beta; eIF-2-beta; EIF2B; EIF2B; EIF2B
Q9BWD1	Q9BWD1			Acetyl-CoA acetyltransferase, cytosolic	ACAT2	Acetyl-CoA transferase-like protein; Cytosolic acetoacetyl-CoA thiolase; ACTL; ACTL; ACTL; ACTL; ACTL; ACTL
P06241	P06241			Tyrosine-protein kinase Fyn	FYN	Proto-oncogene Syn; Proto-oncogene c-Fyn; Src-like kinase; SLK; p59-Fyn
P78344	P78344			Eukaryotic translation initiation factor 4 gamma 2	EIF4G2	eIF-4-gamma 2; eIF-4G 2; eIF4G 2; Death-associated protein 5; DAP-5; p97; DAP5; DAP5; DAP5; DAP5; DAP5; DAP5; DAP5; DAP5; DAP5; DAP5; DAP5
Q6ZVM7	Q6ZVM7			TOM1-like protein 2	TOM1L2	Target of Myb-like protein 2
Q9NZN4	Q9NZN4			EH domain-containing protein 2 {ECO:0000305}	EHD2	PAST homolog 2 {ECO:0000305}; PAST2; PAST2; PAST2; PAST2
Q9Y490	Q9Y490			Talin-1	TLN1	KIAA1027,; KIAA1027,; KIAA1027,; KIAA1027,; KIAA1027,; KIAA1027,
P35222	P35222			Catenin beta-1	CTNNB1	Beta-catenin; CTNNB; CTNNB; CTNNB; CTNNB; CTNNB
O00629	O00629			Importin subunit alpha-3	KPNA4	Importin alpha Q1; Qip1; Karyopherin subunit alpha-4; QIP1; QIP1; QIP1; QIP1
P00491	P00491			Purine nucleoside phosphorylase	PNP	PNP; Inosine phosphorylase; Inosine-guanosine phosphorylase; NP; NP; NP; NP; NP
Q96N67	Q96N67			Dedicator of cytokinesis protein 7	DOCK7	KIAA1771; KIAA1771; KIAA1771; KIAA1771; KIAA1771; KIAA1771; KIAA1771; KIAA1771; KIAA1771; KIAA1771; KIAA1771; KIAA1771
P13591	P13591			Neural cell adhesion molecule 1	NCAM1	N-CAM-1; NCAM-1; NCAM; NCAM; NCAM; NCAM; NCAM; NCAM; NCAM; NCAM; NCAM; NCAM; NCAM
Q9Y617	Q9Y617			Phosphoserine aminotransferase	PSAT1	Phosphohydroxythreonine aminotransferase; PSAT; PSA; PSA; PSA; PSA; PSA
P48444	P48444			Coatomer subunit delta	ARCN1	Archain; Delta-coat protein; Delta-COP; COPD; COPD; COPD; COPD
P62834	P62834			Ras-related protein Rap-1A	RAP1A	C21KG; G-22K; GTP-binding protein smg p21A; Ras-related protein Krev-1; KREV1; KREV1
P31689	P31689			DnaJ homolog subfamily A member 1	DNAJA1	DnaJ protein homolog 2; HSDJ; Heat shock 40 kDa protein 4; Heat shock protein J2; HSJ-2; Human DnaJ protein 2; hDj-2; DNAJ2,; DNAJ2,; DNAJ2,
P0CW22	P0CW22			40S ribosomal protein S17 {ECO:0000305}	RPS17	RPS17L; RPS17L; RPS17L
Q15058	Q15058			Kinesin-like protein KIF14 {ECO:0000305}	KIF14	KIAA0042; KIAA0042; KIAA0042; KIAA0042
Q96G03	Q96G03			Phosphoglucomutase-2	PGM2	PGM 2; Glucose phosphomutase 2; Phosphodeoxyribomutase; Phosphopentomutase
O15427	O15427			Monocarboxylate transporter 4	SLC16A3	MCT 4; Solute carrier family 16 member 3; MCT4; MCT4; MCT4
P01903	P01903			HLA class II histocompatibility antigen, DR alpha chain	HLA-DRA	MHC class II antigen DRA; HLA-DRA1; HLA-DRA1; HLA-DRA1; HLA-DRA1; HLA-DRA1; HLA-DRA1
Q86T65	Q86T65			Disheveled-associated activator of morphogenesis 2	DAAM2	KIAA0381; KIAA0381; KIAA0381; KIAA0381; KIAA0381; KIAA0381
P46782	P46782			40S ribosomal protein S5	RPS5
P53396	P53396			ATP-citrate synthase	ACLY	ATP-citrate (pro-S-)-lyase; ACL; Citrate cleavage enzyme
P11908	P11908			Ribose-phosphate pyrophosphokinase 2	PRPS2	PPRibP; Phosphoribosyl pyrophosphate synthase II; PRS-II
P09525	P09525			Annexin A4	ANXA4	35-beta calcimedin; Annexin IV; Annexin-4; Carbohydrate-binding protein p33/p41; Chromobindin-4; Endonexin I; Lipocortin IV; P32.5; PP4-X; Placental anticoagulant protein II; PAP-II; Protein II; ANX4; ANX4; ANX4; ANX4
P54619	P54619			5'-AMP-activated protein kinase subunit gamma-1	PRKAG1	AMPK gamma1; AMPK subunit gamma-1; AMPKg
P39019	P39019			40S ribosomal protein S19	RPS19
P61313	P61313			60S ribosomal protein L15	RPL15	EC45; EC45; EC45; EC45; EC45; EC45; EC45; EC45; EC45
Q99572	Q99572			P2X purinoceptor 7	P2RX7	P2X7; ATP receptor; P2Z receptor; Purinergic receptor
P49720	P49720			Proteasome subunit beta type-3	PSMB3	Proteasome chain 13; Proteasome component C10-II; Proteasome theta chain
O43396	O43396			Thioredoxin-like protein 1	TXNL1	32 kDa thioredoxin-related protein; TRP32,
P16671	P16671			Platelet glycoprotein 4	CD36	Fatty acid translocase; FAT; Glycoprotein IIIb; GPIIIB; Leukocyte differentiation antigen CD36; PAS IV; PAS-4; Platelet collagen receptor; Platelet glycoprotein IV; GPIV; Thrombospondin receptor; GP3B,; GP3B,; GP3B,; GP3B,; GP3B,; GP3B,; GP3B,; GP3B,; GP3B,; GP3B,; GP3B,; GP3B,; GP3B,; GP3B,
O94973	O94973			AP-2 complex subunit alpha-2	AP2A2	100 kDa coated vesicle protein C; Adaptor protein complex AP-2 subunit alpha-2; Adaptor-related protein complex 2 subunit alpha-2; Alpha-adaptin C; Alpha2-adaptin; Clathrin assembly protein complex 2 alpha-C large chain; Huntingtin yeast partner J; Huntingtin-interacting protein 9; HIP-9; Huntingtin-interacting protein J; Plasma membrane adaptor HA2/AP2 adaptin alpha C subunit; ADTAB,; ADTAB,; AD…
P63244	P63244			Receptor of activated protein C kinase 1	RACK1	Cell proliferation-inducing gene 21 protein; Guanine nucleotide-binding protein subunit beta-2-like 1; Guanine nucleotide-binding protein subunit beta-like protein 12.3; Human lung cancer oncogene 7 protein; HLC-7; Receptor for activated C kinase; GNB2L1; GNB2L1; GNB2L1; GNB2L1; GNB2L1; GNB2L1; GNB2L1; GNB2L1; GNB2L1; GNB2L1; GNB2L1; GNB2L1; GNB2L1; GNB2L1; GNB2L1; GNB2L1; GNB2L1; GNB2L1
Q02878	Q02878			60S ribosomal protein L6	RPL6	Neoplasm-related protein C140; Tax-responsive enhancer element-binding protein 107; TaxREB107; TXREB1; TXREB1; TXREB1
Q13596	Q13596			Sorting nexin-1	SNX1
P14324	P14324			Farnesyl pyrophosphate synthase	FDPS	FPP synthase; FPS; (2E,6E)-farnesyl diphosphate synthase; Dimethylallyltranstransferase; Farnesyl diphosphate synthase; Geranyltranstransferase; FPS,; FPS,; FPS,; FPS,
P48509	P48509			CD151 antigen	CD151	GP27; Membrane glycoprotein SFA-1; Platelet-endothelial tetraspan antigen 3; PETA-3; Tetraspanin-24; Tspan-24; TSPAN24; TSPAN24; TSPAN24; TSPAN24; TSPAN24; TSPAN24
Q9Y678	Q9Y678			Coatomer subunit gamma-1	COPG1	Gamma-1-coat protein; Gamma-1-COP; COPG; COPG; COPG; COPG
Q7L9L4	Q7L9L4			MOB kinase activator 1B	MOB1B	Mob1 homolog 1A; Mob1A; Mob1B; Mps one binder kinase activator-like 1A; MOB4A,; MOB4A,; MOB4A,; MOB4A,
P52789	P52789			Hexokinase-2	HK2	Hexokinase type II; HK II; Muscle form hexokinase
Q14019	Q14019			Coactosin-like protein	COTL1	CLP; CLP; CLP; CLP
Q9P2J5	Q9P2J5			Leucine--tRNA ligase, cytoplasmic	LARS	Leucyl-tRNA synthetase; LeuRS; KIAA1352; KIAA1352; KIAA1352; KIAA1352; KIAA1352; KIAA1352
O95747	O95747			Serine/threonine-protein kinase OSR1	OXSR1	Oxidative stress-responsive 1 protein; KIAA1101; KIAA1101; KIAA1101; KIAA1101; KIAA1101; KIAA1101; KIAA1101; KIAA1101
P33176	P33176			Kinesin-1 heavy chain	KIF5B	Conventional kinesin heavy chain; Ubiquitous kinesin heavy chain; UKHC; KNS,; KNS,; KNS,
P04632	P04632			Calpain small subunit 1	CAPNS1	CSS1; Calcium-activated neutral proteinase small subunit; CANP small subunit; Calcium-dependent protease small subunit; CDPS; Calcium-dependent protease small subunit 1; Calpain regulatory subunit; CAPN4,; CAPN4,; CAPN4,; CAPN4,
P05386	P05386			60S acidic ribosomal protein P1	RPLP1	RRP1; RRP1
P02545	P02545			Prelamin-A/C	LMNA	LMN1; LMN1; LMN1; LMN1; LMN1; LMN1; LMN1; LMN1; LMN1; LMN1; LMN1; LMN1; LMN1
Q9UHY7	Q9UHY7			Enolase-phosphatase E1 {ECO:0000255|HAMAP-Rule:MF_03117}	ENOPH1	2,3-diketo-5-methylthio-1-phosphopentane phosphatase {ECO:0000255|HAMAP-Rule:MF_03117}; MASA homolog {ECO:0000255|HAMAP-Rule:MF_03117}; MASA; MASA; MASA
Q3LXA3	Q3LXA3			Name: Full=FAD-AMP lyase (cyclizing)	TKFC	Bifunctional ATP-dependent dihydroxyacetone kinase/FAD-AMP lyase (cyclizing); DHA kinase; Glycerone kinase; Triokinase; Triose kinase; FAD-AMP lyase (cyclic FMN forming); FMN cyclase; DAK; DAK; DAK; DAK; DAK
P41250	P41250			Glycine--tRNA ligase	GARS	Diadenosine tetraphosphate synthetase; AP-4-A synthetase; Glycyl-tRNA synthetase; GlyRS
Q96KK5	Q96KK5			Histone H2A type 1-H	HIST1H2AH	Histone H2A/s; HIST1H2AI
Q13509	Q13509			Tubulin beta-3 chain	TUBB3	Tubulin beta-4 chain; Tubulin beta-III; TUBB4; TUBB4; TUBB4; TUBB4
P30043	P30043			Flavin reductase (NADPH)	BLVRB	FR; Biliverdin reductase B; BVR-B; Biliverdin-IX beta-reductase; Green heme-binding protein; GHBP; NADPH-dependent diaphorase; NADPH-flavin reductase; FLR; FLR; FLR; FLR; FLR; FLR; FLR
P17812	P17812			CTP synthase 1 {ECO:0000305}	CTPS1	CTP synthetase 1; UTP--ammonia ligase 1; CTPS; CTPS; CTPS; CTPS; CTPS
Q9NVA2	Q9NVA2			Septin-11	SEPT11
P18621	P18621			60S ribosomal protein L17	RPL17	60S ribosomal protein L23; PD-1
P62280	P62280			40S ribosomal protein S11	RPS11
P78417	P78417			Glutathione S-transferase omega-1	GSTO1	GSTO-1; Glutathione S-transferase omega 1-1; GSTO 1-1; Glutathione-dependent dehydroascorbate reductase; Monomethylarsonic acid reductase; MMA(V) reductase; S-(Phenacyl)glutathione reductase; SPG-R; GSTTLP28; GSTTLP28; GSTTLP28; GSTTLP28; GSTTLP28
P46776	P46776			60S ribosomal protein L27a	RPL27A
O60711	O60711			Leupaxin	LPXN	LDLP; LDLP; LDLP; LDLP; LDLP
Q05682	Q05682			Caldesmon	CALD1	CDM; CAD,; CAD,; CAD,; CAD,; CAD,; CAD,; CAD,
P61254	P61254			60S ribosomal protein L26	RPL26
P07384	P07384			Calpain-1 catalytic subunit	CAPN1	Calcium-activated neutral proteinase 1; CANP 1; Calpain mu-type; Calpain-1 large subunit; Cell proliferation-inducing gene 30 protein; Micromolar-calpain; muCANP; CANPL1; CANPL1; CANPL1
P08582	P08582			Melanotransferrin {ECO:0000312|HGNC:HGNC:7037}	MELTF	Melanoma-associated antigen p97; MAP97,; MAP97,
Q13425	Q13425			Beta-2-syntrophin	SNTB2	59 kDa dystrophin-associated protein A1 basic component 2; Syntrophin-3; SNT3; Syntrophin-like; SNTL; D16S2531E,; D16S2531E,
Q9UGH3	Q9UGH3			Solute carrier family 23 member 2	SLC23A2	Na(+)/L-ascorbic acid transporter 2; Nucleobase transporter-like 1 protein; Sodium-dependent vitamin C transporter 2; hSVCT2; Yolk sac permease-like molecule 2; KIAA0238,; KIAA0238,; KIAA0238,; KIAA0238,; KIAA0238,; KIAA0238,; KIAA0238,
P21333	P21333			Filamin-A	FLNA	FLN-A; Actin-binding protein 280; ABP-280; Alpha-filamin; Endothelial actin-binding protein; Filamin-1; Non-muscle filamin; FLN,; FLN,; FLN,; FLN,; FLN,
P62805	P62805			Histone H4	HIST1H4A; HIST1H4B; HIST1H4C; HIST1H4D; HIST1H4E; HIST1H4F; HIST1H4H; HIST1H4I; HIST1H4J; HIST1H4K; HIST1H4L; HIST2H4A; HIST2H4B; HIST4H4	H4/A,; H4/A,; H4/A,; H4/A,; H4/A,; H4/A,; H4/A,; H4/A,; H4/A,; H4/A,; H4/A,; H4/A,; H4/A,; H4/A,; H4/I,; H4/I,; H4/I,; H4/I,; H4/I,; H4/I,; H4/I,; H4/I,; H4/I,; H4/I,; H4/I,; H4/I,; H4/I,; H4/I,; H4/G,; H4/G,; H4/G,; H4/G,; H4/G,; H4/G,; H4/G,; H4/G,; H4/G,; H4/G,; H4/G,; H4/G,; H4/G,; H4/G,; H4/B,; H4/B,; H4/B,; H4/B,; H4/B,; H4/B,; H4/B,; H4/B,; H4/B,; H4/B,; H4/B,; H4/B,; H4/B,; H4/B,; H4/J,; …
O15484	O15484			Calpain-5	CAPN5	Calpain htra-3; New calpain 3; nCL-3; NCL3; NCL3
P50148	P50148			Guanine nucleotide-binding protein G(q) subunit alpha	GNAQ	Guanine nucleotide-binding protein alpha-q; GAQ; GAQ; GAQ; GAQ; GAQ; GAQ
P04080	P04080			Cystatin-B	CSTB	CPI-B; Liver thiol proteinase inhibitor; Stefin-B; CST6,
P05106	P05106			Integrin beta-3	ITGB3	Platelet membrane glycoprotein IIIa; GPIIIa; GP3A; GP3A; GP3A; GP3A; GP3A; GP3A; GP3A; GP3A
P30086	P30086			Phosphatidylethanolamine-binding protein 1	PEBP1	PEBP-1; HCNPpp; Neuropolypeptide h3; Prostatic-binding protein; Raf kinase inhibitor protein; RKIP; PBP,; PBP,
Q9Y4G6	Q9Y4G6			Talin-2	TLN2	KIAA0320; KIAA0320
P48643	P48643			T-complex protein 1 subunit epsilon	CCT5	TCP-1-epsilon; CCT-epsilon; CCTE,; CCTE,; CCTE,; CCTE,
P17813	P17813			Endoglin	ENG	END; END; END; END
Q92614	Q92614			Unconventional myosin-XVIIIa	MYO18A	Molecule associated with JAK3 N-terminus; MAJN; Myosin containing a PDZ domain; Surfactant protein receptor SP-R210 {ECO:0000303|PubMed:16087679}; SP-R210 {ECO:0000303|PubMed:16087679}; CD245; CD245; CD245; CD245; CD245; CD245
Q92930	Q92930			Ras-related protein Rab-8B	RAB8B
P35579	P35579			Myosin-9	MYH9	Cellular myosin heavy chain, type A; Myosin heavy chain 9; Myosin heavy chain, non-muscle IIa; Non-muscle myosin heavy chain A; NMMHC-A; Non-muscle myosin heavy chain IIa; NMMHC II-a; NMMHC-IIA
P49755	P49755			Transmembrane emp24 domain-containing protein 10	TMED10	21 kDa transmembrane-trafficking protein; S31III125; S31I125; Tmp-21-I; Transmembrane protein Tmp21; p23; p24 family protein delta-1; p24delta1; p24delta; TMP21; TMP21; TMP21; TMP21; TMP21; TMP21
Q9Y450	Q9Y450			HBS1-like protein	HBS1L	ERFS; HBS1,; HBS1,; HBS1,; HBS1,; HBS1,; HBS1,; HBS1,
Q9H4A4	Q9H4A4			Aminopeptidase B	RNPEP	AP-B; Arginine aminopeptidase; Arginyl aminopeptidase; APB; APB; APB; APB
P08865	P08865			40S ribosomal protein SA {ECO:0000255|HAMAP-Rule:MF_03016}	RPSA	37 kDa laminin receptor precursor {ECO:0000255|HAMAP-Rule:MF_03016}; 37LRP {ECO:0000255|HAMAP-Rule:MF_03016}; 37/67 kDa laminin receptor {ECO:0000255|HAMAP-Rule:MF_03016}; LRP/LR {ECO:0000255|HAMAP-Rule:MF_03016}; 67 kDa laminin receptor {ECO:0000255|HAMAP-Rule:MF_03016}; 67LR {ECO:0000255|HAMAP-Rule:MF_03016}; Colon carcinoma laminin-binding protein; Laminin receptor 1 {ECO:0000255|HAMAP-Rule:MF…
Q04760	Q04760			Lactoylglutathione lyase	GLO1	Aldoketomutase; Glyoxalase I; Glx I; Ketone-aldehyde mutase; Methylglyoxalase; S-D-lactoylglutathione methylglyoxal lyase
Q10567	Q10567			AP-1 complex subunit beta-1	AP1B1	Adaptor protein complex AP-1 subunit beta-1; Adaptor-related protein complex 1 subunit beta-1; Beta-1-adaptin; Beta-adaptin 1; Clathrin assembly protein complex 1 beta large chain; Golgi adaptor HA1/AP1 adaptin beta subunit; ADTB1,; ADTB1,; ADTB1,; ADTB1,; ADTB1,; ADTB1,
P25398	P25398			40S ribosomal protein S12	RPS12
O95373	O95373			Importin-7	IPO7	Imp7; Ran-binding protein 7; RanBP7; RANBP7; RANBP7; RANBP7; RANBP7; RANBP7; RANBP7
O14828	O14828			Secretory carrier-associated membrane protein 3	SCAMP3	Secretory carrier membrane protein 3; C1orf3,; C1orf3,; C1orf3,; C1orf3,; C1orf3,; C1orf3,
P61225	P61225			Ras-related protein Rap-2b	RAP2B
O00571	O00571			ATP-dependent RNA helicase DDX3X	DDX3X	DEAD box protein 3, X-chromosomal; DEAD box, X isoform; Helicase-like protein 2; HLP2; DBX,; DBX,; DBX,; DBX,
P63092	P63092			Guanine nucleotide-binding protein G(s) subunit alpha isoforms short	GNAS	Adenylate cyclase-stimulating G alpha protein; GNAS1,; GNAS1,; GNAS1,; GNAS1,; GNAS1,; GNAS1,; GNAS1,; GNAS1,; GNAS1,; GNAS1,; GNAS1,; GNAS1,; GNAS1,; GNAS1,
P14314	P14314			Glucosidase 2 subunit beta	PRKCSH	80K-H protein; Glucosidase II subunit beta; Protein kinase C substrate 60.1 kDa protein heavy chain; PKCSH; G19P1; G19P1; G19P1; G19P1; G19P1
P09382	P09382			Galectin-1	LGALS1	Gal-1; 14 kDa laminin-binding protein; HLBP14; 14 kDa lectin; Beta-galactoside-binding lectin L-14-I; Galaptin; HBL; HPL; Lactose-binding lectin 1; Lectin galactoside-binding soluble 1; Putative MAPK-activating protein PM12; S-Lac lectin 1
P55786	P55786			Puromycin-sensitive aminopeptidase	NPEPPS	PSA; Cytosol alanyl aminopeptidase; AAP-S; PSA; PSA; PSA; PSA; PSA
P41091	P41091			Eukaryotic translation initiation factor 2 subunit 3	EIF2S3	Eukaryotic translation initiation factor 2 subunit gamma X; eIF-2-gamma X; eIF-2gX; EIF2G; EIF2G; EIF2G; EIF2G; EIF2G; EIF2G
P49189	P49189			4-trimethylaminobutyraldehyde dehydrogenase	ALDH9A1	TMABADH; Aldehyde dehydrogenase E3 isozyme; Aldehyde dehydrogenase family 9 member A1; Gamma-aminobutyraldehyde dehydrogenase; R-aminobutyraldehyde dehydrogenase; ALDH4,; ALDH4,; ALDH4,; ALDH4,; ALDH4,; ALDH4,
Q9Y281	Q9Y281			Cofilin-2	CFL2	Cofilin, muscle isoform
P42224	P42224			Signal transducer and activator of transcription 1-alpha/beta	STAT1	Transcription factor ISGF-3 components p91/p84
P26640	P26640			Valine--tRNA ligase	VARS	Protein G7a; Valyl-tRNA synthetase; ValRS; G7A,; G7A,; G7A,; G7A,; G7A,; G7A,
O60488	O60488			Long-chain-fatty-acid--CoA ligase 4	ACSL4	Long-chain acyl-CoA synthetase 4; LACS 4; ACS4,; ACS4,; ACS4,; ACS4,; ACS4,
P27797	P27797			Calreticulin	CALR	CRP55; Calregulin; Endoplasmic reticulum resident protein 60; ERp60; HACBP; grp60; CRTC; CRTC; CRTC
Q15185	Q15185			Prostaglandin E synthase 3	PTGES3	Cytosolic prostaglandin E2 synthase; cPGES; Hsp90 co-chaperone; Progesterone receptor complex p23; Telomerase-binding protein p23; P23,; P23,; P23,; P23,; P23,; P23,
P36873	P36873			Serine/threonine-protein phosphatase PP1-gamma catalytic subunit	PPP1CC	PP-1G; Protein phosphatase 1C catalytic subunit
O95782	O95782			AP-2 complex subunit alpha-1	AP2A1	100 kDa coated vesicle protein A; Adaptor protein complex AP-2 subunit alpha-1; Adaptor-related protein complex 2 subunit alpha-1; Alpha-adaptin A; Alpha1-adaptin; Clathrin assembly protein complex 2 alpha-A large chain; Plasma membrane adaptor HA2/AP2 adaptin alpha A subunit; ADTAA,; ADTAA,; ADTAA,; ADTAA,; ADTAA,
Q02543	Q02543			60S ribosomal protein L18a	RPL18A
P27635	P27635			60S ribosomal protein L10	RPL10	Laminin receptor homolog; Protein QM; Tumor suppressor QM; DXS648E,; DXS648E,; DXS648E,; DXS648E,; DXS648E,; DXS648E,; DXS648E,; DXS648E,
P04406	P04406			Glyceraldehyde-3-phosphate dehydrogenase	GAPDH	GAPDH; Peptidyl-cysteine S-nitrosylase GAPDH; GAPD; GAPD; GAPD; GAPD
P20036	P20036			HLA class II histocompatibility antigen, DP alpha 1 chain	HLA-DPA1	DP(W3); DP(W4); HLA-SB alpha chain; MHC class II DP3-alpha; MHC class II DPA1; HLA-DP1A,; HLA-DP1A,; HLA-DP1A,; HLA-DP1A,; HLA-DP1A,; HLA-DP1A,; HLA-DP1A,; HLA-DP1A,; HLA-DP1A,; HLA-DP1A,; HLA-DP1A,; HLA-DP1A,; HLA-DP1A,; HLA-DP1A,; HLA-DP1A,
Q15582	Q15582			Transforming growth factor-beta-induced protein ig-h3	TGFBI	Beta ig-h3; Kerato-epithelin; RGD-containing collagen-associated protein; RGD-CAP; BIGH3; BIGH3; BIGH3; BIGH3; BIGH3; BIGH3; BIGH3; BIGH3; BIGH3; BIGH3
Q96P70	Q96P70			Importin-9	IPO9	Imp9; Ran-binding protein 9; RanBP9; IMP9,; IMP9,; IMP9,; IMP9,; IMP9,; IMP9,; IMP9,; IMP9,; IMP9,
Q16881	Q16881			Thioredoxin reductase 1, cytoplasmic	TXNRD1	TR; Gene associated with retinoic and interferon-induced mortality 12 protein; GRIM-12; Gene associated with retinoic and IFN-induced mortality 12 protein; KM-102-derived reductase-like factor; Thioredoxin reductase TR1; GRIM12,; GRIM12,; GRIM12,; GRIM12,; GRIM12,; GRIM12,; GRIM12,; GRIM12,; GRIM12,; GRIM12,; GRIM12,; GRIM12,; GRIM12,; GRIM12,; GRIM12,; GRIM12,; GRIM12,; GRIM12,; GRIM12,; GRIM12,…
P11766	P11766			Alcohol dehydrogenase class-3	ADH5	Alcohol dehydrogenase 5; Alcohol dehydrogenase class chi chain; Alcohol dehydrogenase class-III; Glutathione-dependent formaldehyde dehydrogenase; FALDH; FDH; GSH-FDH; S-(hydroxymethyl)glutathione dehydrogenase; ADHX,; ADHX,
Q15084	Q15084			Protein disulfide-isomerase A6	PDIA6	Endoplasmic reticulum protein 5; ER protein 5; ERp5; Protein disulfide isomerase P5; Thioredoxin domain-containing protein 7; ERP5,; ERP5,; ERP5,; ERP5,; ERP5,; ERP5,; ERP5,; ERP5,; ERP5,
P27105	P27105			Erythrocyte band 7 integral membrane protein	STOM	Protein 7.2b; Stomatin; BND7,; BND7,; BND7,; BND7,; BND7,; BND7,
P62906	P62906			60S ribosomal protein L10a	RPL10A	CSA-19; Neural precursor cell expressed developmentally down-regulated protein 6; NEDD-6; NEDD6; NEDD6; NEDD6; NEDD6; NEDD6; NEDD6
P50570	P50570			Dynamin-2	DNM2	DYN2; DYN2; DYN2; DYN2; DYN2; DYN2; DYN2; DYN2
Q7Z2W4	Q7Z2W4			Zinc finger CCCH-type antiviral protein 1	ZC3HAV1	ADP-ribosyltransferase diphtheria toxin-like 13; ARTD13; Zinc finger CCCH domain-containing protein 2; Zinc finger antiviral protein; ZAP; ZC3HDC2; ZC3HDC2; ZC3HDC2; ZC3HDC2; ZC3HDC2; ZC3HDC2; ZC3HDC2; ZC3HDC2
Q86VI3	Q86VI3			Ras GTPase-activating-like protein IQGAP3	IQGAP3
P68371	P68371			Tubulin beta-4B chain	TUBB4B	Tubulin beta-2 chain; Tubulin beta-2C chain; TUBB2C; TUBB2C; TUBB2C
Q07866	Q07866			Kinesin light chain 1	KLC1	KLC 1; KLC,; KLC,; KLC,; KLC,; KLC,; KLC,; KLC,; KLC,; KLC,; KLC,; KLC,; KLC,; KLC,; KLC,; KLC,; KLC,; KLC,; KLC,; KLC,
Q00839	Q00839			Heterogeneous nuclear ribonucleoprotein U	HNRNPU	hnRNP U; Scaffold attachment factor A; SAF-A; p120; pp120; HNRPU,; HNRPU,; HNRPU,; HNRPU,; HNRPU,
P62495	P62495			Eukaryotic peptide chain release factor subunit 1	ETF1	Eukaryotic release factor 1; eRF1; Protein Cl1; TB3-1; ERF1,; ERF1,; ERF1,; ERF1,; ERF1,; ERF1,
Q08211	Q08211			ATP-dependent RNA helicase A	DHX9	RHA; DEAH box protein 9; Leukophysin; LKP; Nuclear DNA helicase II; NDH II; DDX9,; DDX9,; DDX9,; DDX9,; DDX9,; DDX9,; DDX9,; DDX9,
P35625	P35625			Metalloproteinase inhibitor 3	TIMP3	Protein MIG-5; Tissue inhibitor of metalloproteinases 3; TIMP-3
P07900	P07900			Heat shock protein HSP 90-alpha	HSP90AA1	Heat shock 86 kDa; HSP 86; HSP86; Lipopolysaccharide-associated protein 2; LAP-2; LPS-associated protein 2; Renal carcinoma antigen NY-REN-38; HSP90A,; HSP90A,; HSP90A,; HSP90A,; HSP90A,; HSP90A,; HSP90A,
Q16537	Q16537			Serine/threonine-protein phosphatase 2A 56 kDa regulatory subunit epsilon isoform	PPP2R5E	PP2A B subunit isoform B'-epsilon; PP2A B subunit isoform B56-epsilon; PP2A B subunit isoform PR61-epsilon; PP2A B subunit isoform R5-epsilon
P62244	P62244			40S ribosomal protein S15a	RPS15A
P26373	P26373			60S ribosomal protein L13	RPL13	Breast basic conserved protein 1; BBC1; BBC1; BBC1; BBC1; BBC1; BBC1
P49419	P49419			Alpha-aminoadipic semialdehyde dehydrogenase	ALDH7A1	Alpha-AASA dehydrogenase; Aldehyde dehydrogenase family 7 member A1; Antiquitin-1; Betaine aldehyde dehydrogenase; Delta1-piperideine-6-carboxylate dehydrogenase; P6c dehydrogenase; ATQ1; ATQ1; ATQ1; ATQ1; ATQ1; ATQ1; ATQ1; ATQ1
P50395	P50395			Rab GDP dissociation inhibitor beta	GDI2	Rab GDI beta; Guanosine diphosphate dissociation inhibitor 2; GDI-2; RABGDIB; RABGDIB; RABGDIB; RABGDIB
Q92747	Q92747			Actin-related protein 2/3 complex subunit 1A	ARPC1A	SOP2-like protein; SOP2L; SOP2L; SOP2L; SOP2L; SOP2L; SOP2L; SOP2L
P21283	P21283			V-type proton ATPase subunit C 1	ATP6V1C1	V-ATPase subunit C 1; Vacuolar proton pump subunit C 1; ATP6C,
O60664	O60664			Perilipin-3	PLIN3	47 kDa mannose 6-phosphate receptor-binding protein; 47 kDa MPR-binding protein; Cargo selection protein TIP47; Mannose-6-phosphate receptor-binding protein 1; Placental protein 17; PP17; M6PRBP1,; M6PRBP1,; M6PRBP1,; M6PRBP1,; M6PRBP1,; M6PRBP1,; M6PRBP1,
P13010	P13010			X-ray repair cross-complementing protein 5	XRCC5	86 kDa subunit of Ku antigen; ATP-dependent DNA helicase 2 subunit 2; ATP-dependent DNA helicase II 80 kDa subunit; CTC box-binding factor 85 kDa subunit; CTC85; CTCBF; DNA repair protein XRCC5; Ku80; Ku86; Lupus Ku autoantigen protein p86; Nuclear factor IV; Thyroid-lupus autoantigen; TLAA; X-ray repair complementing defective repair in Chinese hamster cells 5 (double-strand-break rejoining); G2…
P62241	P62241			40S ribosomal protein S8	RPS8
O95239	O95239			Chromosome-associated kinesin KIF4A	KIF4A	Chromokinesin-A; KIF4; KIF4; KIF4; KIF4; KIF4; KIF4; KIF4; KIF4
O00186	O00186			Syntaxin-binding protein 3	STXBP3	Platelet Sec1 protein; PSP; Protein unc-18 homolog 3; Unc18-3; Protein unc-18 homolog C; Unc-18C
Q99436	Q99436			Proteasome subunit beta type-7	PSMB7	Macropain chain Z; Multicatalytic endopeptidase complex chain Z; Proteasome subunit Z; Z; Z; Z; Z; Z

## Sheet: WM115 Cellular component
Analysis:Cellular component
Name of data set: WM115
Number of protein in data set: 973
Number of protein mapped to Cellular component : 972
Cellular component	No. of genes in the data set		No. of genes in the background data set	Percentage of genes		Fold Enrichment	Uncorrected p-value (Hypergeometric test)	Corrected p-value (Bonferroni method)	Corrected p-value (BH method)	Storey and Tibshirani method q-value	Genes mapped from input data set
cytosol	561		17764	57.716		2.71526	2.10237e-136	1.39597e-133	6.97987e-134	1.78817e-134	,,,,,,,,,,,,,,,,,,,,,,,,,,,,,,,,,,,,,,,,,,,,,,,,,,,,,,,,,,,,,,,,,,,,,,,,,,,,,,,,,,,,,,,,,,,,,,,,,,,,,,,,,,,,,,,,,,,,,,,,,,,,,,,,,,,,,,,,,,,,,,,,,,,,,,,,,,,,,,,,,,,,,,,,,,,,,,,,,,,,,,,,,,,,,,,,,,,,,,,,,,,,,,,,,,,,,,,,,,,,,,,,,,,,,,,,,,,,,,,,,,,,,,,,,,,,,,,,,,,,,,,,,,,,,,,,,,,,,,,,,,,,,,,,,,,,,,,,,,,,,,,,,,,,,,,,,,,,,,,,,,,,,,,,,,,,,,,,,,,,,,,,,,,,,,,,,,,,,,,,,,,,,,,,,,,,,,,,,,,,,,,,,,,,,,,,,,,,,,,…
membrane	381		10640	39.1975		3.08182	5.61726e-97	3.72986e-94	1.24329e-94	3.18518e-95	,,,,,,,,,,,,,,,,,,,,,,,,,,,,,,,,,,,,,,,,,,,,,,,,,,,,,,,,,,,,,,,,,,,,,,,,,,,,,,,,,,,,,,,,,,,,,,,,,,,,,,,,,,,,,,,,,,,,,,,,,,,,,,,,,,,,,,,,,,,,,,,,,,,,,,,,,,,,,,,,,,,,,,,,,,,,,,,,,,,,,,,,,,,,,,,,,,,,,,,,,,,,,,,,,,,,,,,,,,,,,,,,,,,,,,,,,,,,,,,,,,,,,,,,,,,,,,,,,,,,,,,,,,,,,,,,,,,,,,,,,,,,,,,,,,,,,,,,,,,,,,,,,,,,,,,,,,,,,,,,,,,,,,,,,,,,,,,,,,,,,,,,,,,,,,,,,,,,,,,,,,,,,,,,,,,,,,,,,,,,
focal adhesion	183		2279	18.8272		6.93231	4.06409e-96	2.69855e-93	6.74638e-94	1.72836e-94	,,,,,,,,,,,,,,,,,,,,,,,,,,,,,,,,,,,,,,,,,,,,,,,,,,,,,,,,,,,,,,,,,,,,,,,,,,,,,,,,,,,,,,,,,,,,,,,,,,,,,,,,,,,,,,,,,,,,,,,,,,,,,,,,,,,,,,,,,,,,,,,,,,,,,,,,,,,,,,,,,,,,,,,,,,,,,,,,,,,,,,
cell-cell adherens junction	134		1880	13.786		6.16799	2.29398e-63	1.5232e-60	3.0464e-61	7.80457e-62	,,,,,,,,,,,,,,,,,,,,,,,,,,,,,,,,,,,,,,,,,,,,,,,,,,,,,,,,,,,,,,,,,,,,,,,,,,,,,,,,,,,,,,,,,,,,,,,,,,,,,,,,,,,,,,,,,,,,,,,,,,,,,,,,,,,,,
melanosome	64		555	6.58436		10.0638	7.95469e-43	5.28192e-40	8.80319e-41	2.25529e-41	,,,,,,,,,,,,,,,,,,,,,,,,,,,,,,,,,,,,,,,,,,,,,,,,,,,,,,,,,,,,,,,
extracellular matrix	85		1111	8.74486		6.65288	1.79971e-42	1.195e-39	1.70715e-40	4.37354e-41	,,,,,,,,,,,,,,,,,,,,,,,,,,,,,,,,,,,,,,,,,,,,,,,,,,,,,,,,,,,,,,,,,,,,,,,,,,,,,,,,,,,,
cytoplasm	509		26464	52.3663		1.65409	4.32385e-41	2.87104e-38	3.5888e-39	9.19414e-40	,,,,,,,,,,,,,,,,,,,,,,,,,,,,,,,,,,,,,,,,,,,,,,,,,,,,,,,,,,,,,,,,,,,,,,,,,,,,,,,,,,,,,,,,,,,,,,,,,,,,,,,,,,,,,,,,,,,,,,,,,,,,,,,,,,,,,,,,,,,,,,,,,,,,,,,,,,,,,,,,,,,,,,,,,,,,,,,,,,,,,,,,,,,,,,,,,,,,,,,,,,,,,,,,,,,,,,,,,,,,,,,,,,,,,,,,,,,,,,,,,,,,,,,,,,,,,,,,,,,,,,,,,,,,,,,,,,,,,,,,,,,,,,,,,,,,,,,,,,,,,,,,,,,,,,,,,,,,,,,,,,,,,,,,,,,,,,,,,,,,,,,,,,,,,,,,,,,,,,,,,,,,,,,,,,,,,,,,,,,,,,,,,,,,,,,,,,,,,,,…
myelin sheath	71		776	7.30453		7.97499	1.22073e-40	8.10564e-38	9.00627e-39	2.30732e-39	,,,,,,,,,,,,,,,,,,,,,,,,,,,,,,,,,,,,,,,,,,,,,,,,,,,,,,,,,,,,,,,,,,,,,,
proteasome complex	37		287	3.80658		11.3845	5.03453e-27	3.34293e-24	3.34293e-25	8.56424e-26	,,,,,,,,,,,,,,,,,,,,,,,,,,,,,,,,,,,,
intracellular ribonucleoprotein complex	46		589	4.73251		6.86782	7.81557e-24	5.18954e-21	4.71776e-22	1.20864e-22	,,,,,,,,,,,,,,,,,,,,,,,,,,,,,,,,,,,,,,,,,,,,,
cytosolic small ribosomal subunit	27		178	2.77778		13.5211	5.34226e-22	3.54726e-19	2.95605e-20	7.5731e-21	,,,,,,,,,,,,,,,,,,,,,,,,,,
cytosolic large ribosomal subunit	30		265	3.08642		10.0696	1.57696e-20	1.0471e-17	8.05464e-19	2.06352e-19	,,,,,,,,,,,,,,,,,,,,,,,,,,,,,
proteasome accessory complex	16		93	1.64609		15.7022	1.66479e-14	1.10542e-11	7.89585e-13	2.02284e-13	,,,,,,,,,,,,,,,
ribosome	20		193	2.05761		9.38536	1.98744e-13	1.31966e-10	8.79772e-12	2.25389e-12	,,,,,,,,,,,,,,,,,,,
perinuclear region of cytoplasm	90		3415	9.25926		2.29159	9.76807e-13	6.486e-10	4.05375e-11	1.03853e-11	,,,,,,,,,,,,,,,,,,,,,,,,,,,,,,,,,,,,,,,,,,,,,,,,,,,,,,,,,,,,,,,,,,,,,,,,,,,,,,,,,,,,,,,,,
proteasome core complex	14		93	1.44033		13.8817	4.8515e-12	3.22139e-09	1.89494e-10	4.85464e-11	,,,,,,,,,,,,,
cytoplasmic ribonucleoprotein granule	16		136	1.64609		10.7828	7.18132e-12	4.7684e-09	2.64911e-10	6.78675e-11	,,,,,,,,,,,,,,,
midbody	33		698	3.39506		4.20224	2.21478e-11	1.47062e-08	7.74009e-10	1.98293e-10	,,,,,,,,,,,,,,,,,,,,,,,,,,,,,,,,
protein complex	61		2039	6.27572		2.61763	4.19034e-11	2.78238e-08	1.39119e-09	3.56409e-10	,,,,,,,,,,,,,,,,,,,,,,,,,,,,,,,,,,,,,,,,,,,,,,,,,,,,,,,,,,,,
eukaryotic translation initiation factor 3 complex	12		73	1.23457		15.3099	5.55803e-11	3.69053e-08	1.7574e-09	4.50227e-10	,,,,,,,,,,,
ruffle	26		459	2.6749		5.07956	6.2825e-11	4.17158e-08	1.89617e-09	4.75313e-10	,,,,,,,,,,,,,,,,,,,,,,,,,
vesicle	30		608	3.08642		4.40055	6.42654e-11	4.26723e-08	1.85532e-09	4.75313e-10	,,,,,,,,,,,,,,,,,,,,,,,,,,,,,
actin cytoskeleton	42		1157	4.32099		3.20359	1.81416e-10	1.20461e-07	5.01919e-09	1.28587e-09	,,,,,,,,,,,,,,,,,,,,,,,,,,,,,,,,,,,,,,,,,
extracellular vesicle	20		283	2.05761		6.41374	2.19666e-10	1.45858e-07	5.83432e-09	1.49469e-09	,,,,,,,,,,,,,,,,,,,
cell-cell junction	34		901	3.49794		3.35185	3.76098e-09	2.49729e-06	9.60497e-08	2.4607e-08	,,,,,,,,,,,,,,,,,,,,,,,,,,,,,,,,,
lamellipodium	35		953	3.60082		3.25911	4.42153e-09	2.9359e-06	1.08737e-07	2.78573e-08	,,,,,,,,,,,,,,,,,,,,,,,,,,,,,,,,,,
Arp2/3 protein complex	8		42	0.823045		18.3488	2.72603e-08	1.81009e-05	6.4646e-07	1.65616e-07	,,,,,,,
proteasome regulatory particle, base subcomplex	9		60	0.925926		14.3572	3.29015e-08	2.18466e-05	7.53331e-07	1.92996e-07	,,,,,,,,
eukaryotic translation initiation factor 3 complex, eIF3m	7		30	0.720165		22.6494	4.57136e-08	3.03538e-05	1.01179e-06	2.59211e-07	,,,,,,
brush border	17		284	1.74897		5.48896	5.61664e-08	3.72945e-05	1.20305e-06	3.08209e-07	,,,,,,,,,,,,,,,,
cytoskeleton	50		1895	5.14403		2.31874	1.22474e-07	8.13225e-05	2.54133e-06	6.45282e-07	,,,,,,,,,,,,,,,,,,,,,,,,,,,,,,,,,,,,,,,,,,,,,,,,,
membrane raft	35		1093	3.60082		2.84213	1.25179e-07	8.31192e-05	2.51876e-06	6.45282e-07	,,,,,,,,,,,,,,,,,,,,,,,,,,,,,,,,,,
podosome	13		172	1.33745		7.05659	1.41691e-07	9.40829e-05	2.76714e-06	7.08914e-07	,,,,,,,,,,,,
phagocytic vesicle	13		175	1.33745		6.93647	1.73243e-07	0.000115033	3.28667e-06	8.42012e-07	,,,,,,,,,,,,
proteasome core complex, alpha-subunit complex	7		39	0.720165		17.5849	3.15304e-07	0.000209362	5.8156e-06	1.4899e-06	,,,,,,
small ribosomal subunit	9		78	0.925926		11.0963	3.36746e-07	0.000223599	6.04322e-06	1.54821e-06	,,,,,,,,
chaperonin-containing T-complex	8		58	0.823045		13.3939	3.75662e-07	0.00024944	6.5642e-06	1.68168e-06	,,,,,,,
nuclear proteasome complex	7		41	0.720165		16.7525	4.51644e-07	0.000299891	7.68952e-06	1.96998e-06	,,,,,,
plasma membrane	305		20526	31.3786		1.27997	8.46918e-07	0.000562354	1.40588e-05	3.60173e-06	,,,,,,,,,,,,,,,,,,,,,,,,,,,,,,,,,,,,,,,,,,,,,,,,,,,,,,,,,,,,,,,,,,,,,,,,,,,,,,,,,,,,,,,,,,,,,,,,,,,,,,,,,,,,,,,,,,,,,,,,,,,,,,,,,,,,,,,,,,,,,,,,,,,,,,,,,,,,,,,,,,,,,,,,,,,,,,,,,,,,,,,,,,,,,,,,,,,,,,,,,,,,,,,,,,,,,,,,,,,,,,,,,,,,,,,,,,,,,,,,,,,,,,,,,,,,,,,,,,,,,,,,,,,,,,,,,,,,,,,,,,,,,,,,,,,,,,,,,,,,,,,,
ruffle membrane	21		510	2.16049		3.73379	8.88164e-07	0.000589741	1.43839e-05	3.68502e-06	,,,,,,,,,,,,,,,,,,,,
cell surface	73		3473	7.51029		1.83353	1.24473e-06	0.000826503	1.96786e-05	5.04147e-06	,,,,,,,,,,,,,,,,,,,,,,,,,,,,,,,,,,,,,,,,,,,,,,,,,,,,,,,,,,,,,,,,,,,,,,,,
cell body	18		398	1.85185		4.13655	1.42445e-06	0.000945832	2.19961e-05	5.63518e-06	,,,,,,,,,,,,,,,,,
recycling endosome membrane	13		213	1.33745		5.7062	1.6176e-06	0.00107409	2.44111e-05	6.25388e-06	,,,,,,,,,,,,
cleavage furrow	15		289	1.54321		4.80324	1.99728e-06	0.00132619	2.9471e-05	7.55017e-06	,,,,,,,,,,,,,,
zona pellucida receptor complex	7		52	0.720165		13.2919	2.40495e-06	0.00159689	3.4715e-05	8.89363e-06	,,,,,,
cytosolic proteasome complex	7		53	0.720165		13.0469	2.7431e-06	0.00182142	3.87536e-05	9.92828e-06	,,,,,,
cell periphery	12		197	1.23457		5.73397	4.11895e-06	0.00273498	5.69788e-05	1.45974e-05	,,,,,,,,,,,
cortical actin cytoskeleton	12		199	1.23457		5.6767	4.56865e-06	0.00303358	6.19098e-05	1.58607e-05	,,,,,,,,,,,
nucleolus	82		4204	8.43621		1.69842	4.73381e-06	0.00314325	6.2865e-05	1.61054e-05	,,,,,,,,,,,,,,,,,,,,,,,,,,,,,,,,,,,,,,,,,,,,,,,,,,,,,,,,,,,,,,,,,,,,,,,,,,,,,,,,,
actin filament	14		277	1.44033		4.70205	5.88625e-06	0.00390847	7.66366e-05	1.96335e-05	,,,,,,,,,,,,,
filopodium	17		407	1.74897		3.83521	7.88048e-06	0.00523264	0.000100628	2.57798e-05	,,,,,,,,,,,,,,,,
lysosomal membrane	45		1915	4.62963		2.07068	1.02398e-05	0.00679921	0.000128287	3.22583e-05	,,,,,,,,,,,,,,,,,,,,,,,,,,,,,,,,,,,,,,,,,,,,
caveola	15		331	1.54321		4.19606	1.02401e-05	0.00679945	0.000125916	3.22583e-05	,,,,,,,,,,,,,,
endosome	32		1174	3.29218		2.42725	1.18661e-05	0.00787912	0.000143257	3.67009e-05	,,,,,,,,,,,,,,,,,,,,,,,,,,,,,,,
growth cone	23		707	2.36626		2.9375	1.35489e-05	0.00899647	0.000160651	4.11572e-05	,,,,,,,,,,,,,,,,,,,,,,
proteasome regulatory particle	6		46	0.617284		13.164	1.5434e-05	0.0102482	0.000179792	4.6061e-05	,,,,,
mitochondrion	107		6158	11.0082		1.50783	2.57184e-05	0.017077	0.000294432	7.54305e-05	,,,,,,,,,,,,,,,,,,,,,,,,,,,,,,,,,,,,,,,,,,,,,,,,,,,,,,,,,,,,,,,,,,,,,,,,,,,,,,,,,,,,,,,,,,,,,,,,,,,,,,,,,,
cytoplasmic vesicle membrane	22		697	2.26337		2.8567	3.24511e-05	0.0215475	0.000365213	9.30726e-05	,,,,,,,,,,,,,,,,,,,,,
proteasome regulatory particle, lid subcomplex	5		32	0.514403		16.1265	3.28279e-05	0.0217977	0.000363295	9.30726e-05	,,,,
neuronal cell body	39		1663	4.01235		2.07491	4.08463e-05	0.0271219	0.000444622	0.000113908	,,,,,,,,,,,,,,,,,,,,,,,,,,,,,,,,,,,,,,
COPI vesicle coat	6		56	0.617284		10.8646	4.84689e-05	0.0321833	0.000519086	0.000132985	,,,,,
nucleoplasm	221		14879	22.7366		1.2814	5.43035e-05	0.0360575	0.000572342	0.000146628	,,,,,,,,,,,,,,,,,,,,,,,,,,,,,,,,,,,,,,,,,,,,,,,,,,,,,,,,,,,,,,,,,,,,,,,,,,,,,,,,,,,,,,,,,,,,,,,,,,,,,,,,,,,,,,,,,,,,,,,,,,,,,,,,,,,,,,,,,,,,,,,,,,,,,,,,,,,,,,,,,,,,,,,,,,,,,,,,,,,,,,,,,,,,,,,,,,,,,,,,,,,,,,,,,,,,,,,,,,,,
endoplasmic reticulum chaperone complex	6		60	0.617284		10.1551	7.18454e-05	0.0477053	0.000745396	0.000190963	,,,,,
nuclear pore	13		308	1.33745		3.95328	8.04207e-05	0.0533994	0.000821529	0.000210467	,,,,,,,,,,,,
plasma membrane raft	5		40	0.514403		12.999	9.93244e-05	0.0659514	0.000999264	0.000254825	,,,,
microtubule	38		1675	3.90947		2.00888	0.000100366	0.066643	0.000994672	0.000254825	,,,,,,,,,,,,,,,,,,,,,,,,,,,,,,,,,,,,,
basolateral plasma membrane	27		1032	2.77778		2.34567	0.0001085	0.0720439	0.00105947	0.000269939	,,,,,,,,,,,,,,,,,,,,,,,,,,
polysome	10		195	1.02881		4.91808	0.000109493	0.072703	0.00105367	0.000269939	,,,,,,,,,
nucleus	345		25025	35.4938		1.18699	0.000111414	0.0739787	0.00105684	0.000270751	,,,,,,,,,,,,,,,,,,,,,,,,,,,,,,,,,,,,,,,,,,,,,,,,,,,,,,,,,,,,,,,,,,,,,,,,,,,,,,,,,,,,,,,,,,,,,,,,,,,,,,,,,,,,,,,,,,,,,,,,,,,,,,,,,,,,,,,,,,,,,,,,,,,,,,,,,,,,,,,,,,,,,,,,,,,,,,,,,,,,,,,,,,,,,,,,,,,,,,,,,,,,,,,,,,,,,,,,,,,,,,,,,,,,,,,,,,,,,,,,,,,,,,,,,,,,,,,,,,,,,,,,,,,,,,,,,,,,,,,,,,,,,,,,,,,,,,,,,,,,,,,,,,,,,,,,,,,,,,,,,,,,,,,,,,,,,,,,,,,,,,,,
cytoplasmic vesicle	31		1275	3.1893		2.16794	0.000130026	0.0863371	0.00121602	0.000311531	,,,,,,,,,,,,,,,,,,,,,,,,,,,,,,
microvillus	11		245	1.13169		4.26789	0.000163494	0.10856	0.00150777	0.000386277	,,,,,,,,,,
pseudopodium	6		73	0.617284		8.37712	0.000214959	0.142733	0.00195524	0.000500913	,,,,,
GAIT complex	4		26	0.411523		16.529	0.000222485	0.14773	0.00199635	0.000511445	,,,
blood microparticle	22		804	2.26337		2.47711	0.000247535	0.164363	0.00219151	0.000561443	,,,,,,,,,,,,,,,,,,,,,
myelin sheath abaxonal region	5		49	0.514403		10.6708	0.000264031	0.175317	0.0023068	0.000590979	,,,,
lipid particle	12		308	1.23457		3.67586	0.000310183	0.205961	0.00267482	0.000685262	,,,,,,,,,,,
retromer complex	5		52	0.514403		10.0696	0.000349667	0.232179	0.00297666	0.000762589	,,,,
immunological synapse	8		152	0.823045		5.17838	0.000440853	0.292726	0.0037054	0.000949285	,,,,,,,
PTW/PP1 phosphatase complex	4		31	0.411523		13.9663	0.000447139	0.2969	0.00371125	0.000950785	,,,
integrin complex	7		120	0.720165		5.83748	0.000540537	0.358916	0.00443107	0.00113519	,,,,,,
apical plasma membrane	33		1520	3.39506		1.93158	0.000595012	0.395088	0.00481814	0.00123436	,,,,,,,,,,,,,,,,,,,,,,,,,,,,,,,,
transport vesicle	14		430	1.44033		3.03385	0.000620056	0.411718	0.00496045	0.00127082	,,,,,,,,,,,,,
stress fiber	12		337	1.23457		3.36071	0.00068748	0.456487	0.00543437	0.00139223	,,,,,,,,,,,
flotillin complex	4		36	0.411523		12.0917	0.000799398	0.5308	0.00624471	0.00159983	,,,
endolysosome membrane	5		63	0.514403		8.34564	0.000851319	0.565276	0.00657298	0.00168393	,,,,
ribose phosphate diphosphokinase complex	3		17	0.308642		19.9792	0.000946708	0.628614	0.00722545	0.00185109	,,
cell-cell contact zone	5		66	0.514403		7.97335	0.0010519	0.698461	0.00793705	0.00203339	,,,,
AP-2 adaptor complex	4		39	0.411523		11.1904	0.00108585	0.721004	0.00810117	0.00207544	,,,
proton-transporting two-sector ATPase complex	3		18	0.308642		18.9414	0.00112624	0.747825	0.00830917	0.00210533	,,
cell tip	3		18	0.308642		18.9414	0.00112624	0.747825	0.00821786	0.00210533	,,
lateral plasma membrane	10		263	1.02881		3.6525	0.00115003	0.763617	0.00830018	0.00211354	,,,,,,,,,
endocytic vesicle lumen	6		100	0.617284		6.14322	0.00115548	0.767239	0.00824988	0.00211354	,,,,,
endoplasmic reticulum-Golgi intermediate compartment	12		361	1.23457		3.13805	0.0012388	0.82256	0.00875064	0.00224183	,,,,,,,,,,,
laminin-1 complex	2		5	0.205761		44.6125	0.0013226	0.878207	0.00924428	0.00234942	,
eukaryotic translation elongation factor 1 complex	3		19	0.308642		18.006	0.00132587	0.88038	0.00917063	0.00234942	,,
extrinsic component of cytoplasmic side of plasma membrane	12		365	1.23457		3.10378	0.00135908	0.90243	0.00930341	0.00238344	,,,,,,,,,,,
CRD-mediated mRNA stability complex	4		42	0.411523		10.4142	0.0014375	0.954499	0.00973979	0.00249524	,,,
dendritic spine	16		579	1.64609		2.55051	0.00148517	0.986154	0.00996115	0.00255195	,,,,,,,,,,,,,,,
eukaryotic translation initiation factor 2 complex	3		20	0.308642		17.1586	0.0015464	1	0.0102681	0.002594	,,
specific granule	5		72	0.514403		7.32024	0.0015554	1	0.0102256	0.002594	,,,,
trans-Golgi network transport vesicle	5		72	0.514403		7.32024	0.0015554	1	0.0101253	0.002594	,,,,
fascia adherens	5		73	0.514403		7.22165	0.00165396	1	0.0106624	0.0027316	,,,,
lamellipodium membrane	6		108	0.617284		5.69337	0.00171562	1	0.0109536	0.0028062	,,,,,
catenin complex	4		45	0.411523		9.73869	0.00186157	1	0.0117722	0.00301593	,,,
cytoplasmic side of early endosome membrane	2		6	0.205761		38.459	0.00196858	1	0.0123315	0.00315305	,
smooth endoplasmic reticulum	7		150	0.720165		4.67963	0.00198328	1	0.0123075	0.00315305	,,,,,,
cytoplasmic stress granule	8		194	0.823045		4.06447	0.00211813	1	0.0130226	0.00333625	,,,,,,,
terminal bouton	11		336	1.13169		3.11628	0.00218689	1	0.013322	0.00335325	,,,,,,,,,,
MLL5-L complex	4		47	0.411523		9.33501	0.00218805	1	0.0132079	0.00335325	,,,
nucleotide-activated protein kinase complex	4		47	0.411523		9.33501	0.00218805	1	0.0130889	0.00335325	,,,
heterotrimeric G-protein complex	7		153	0.720165		4.58862	0.0022177	1	0.0131478	0.00336834	,,,,,,
neuron projection	27		1267	2.77778		1.91103	0.00231141	1	0.0135821	0.0034796	,,,,,,,,,,,,,,,,,,,,,,,,,,
myosin complex	7		155	0.720165		4.52988	0.00238547	1	0.0138943	0.00355959	,,,,,,
late endosome	16		609	1.64609		2.42513	0.00245286	1	0.0141626	0.00362832	,,,,,,,,,,,,,,,
aminoacyl-tRNA synthetase multienzyme complex	3		24	0.308642		14.4404	0.0026522	1	0.0151816	0.00388936	,,
multi-eIF complex	2		7	0.205761		33.7973	0.00273475	1	0.0155203	0.00397614	,
retromer, tubulation complex	3		25	0.308642		13.8903	0.00298795	1	0.0168136	0.00427217	,,
basement membrane	13		455	1.33745		2.67957	0.00298858	1	0.0166758	0.00427217	,,,,,,,,,,,,
microvillus membrane	6		122	0.617284		5.04666	0.00316265	1	0.0175	0.00448332	,,,,,
intercalated disc	9		254	0.925926		3.44517	0.00319308	1	0.0175224	0.00448905	,,,,,,,,
early endosome	26		1236	2.6749		1.88957	0.00326235	1	0.0177558	0.00454885	,,,,,,,,,,,,,,,,,,,,,,,,,
basal part of cell	5		86	0.514403		6.14565	0.0033898	1	0.0182994	0.00468812	,,,,
filopodium membrane	6		124	0.617284		4.96607	0.00342672	1	0.0183495	0.00470097	,,,,,
Golgi apparatus	79		4973	8.12757		1.38411	0.0035393	1	0.0188008	0.00481656	,,,,,,,,,,,,,,,,,,,,,,,,,,,,,,,,,,,,,,,,,,,,,,,,,,,,,,,,,,,,,,,,,,,,,,,,,,,,,,
costamere	6		126	0.617284		4.88802	0.00370684	1	0.0195345	0.00492515	,,,,,
myelin sheath adaxonal region	3		27	0.308642		12.9069	0.0037349	1	0.0195274	0.00492515	,,
extrinsic component of external side of plasma membrane	3		27	0.308642		12.9069	0.0037349	1	0.0193748	0.00492515	,,
alphav-beta3 integrin-IGF-1-IGF1R complex	3		27	0.308642		12.9069	0.0037349	1	0.0192246	0.00492515	,,
eukaryotic translation initiation factor 4F complex	4		56	0.411523		7.8675	0.00414975	1	0.0211956	0.00543011	,,,
uropod	4		57	0.411523		7.73244	0.0044224	1	0.0224159	0.00574272	,,,
tubular endosome	3		29	0.308642		12.0536	0.00458605	1	0.0230692	0.00586015	,,
6-phosphofructokinase complex	2		9	0.205761		27.2027	0.00461619	1	0.0230462	0.00586015	,
laminin-10 complex	2		9	0.205761		27.2027	0.00461619	1	0.0228743	0.00586015	,
phagocytic cup	5		94	0.514403		5.62948	0.00495346	1	0.0243637	0.00618263	,,,,
trans-Golgi network	18		776	1.85185		2.12482	0.00503266	1	0.0245712	0.00618263	,,,,,,,,,,,,,,,,,
polysomal ribosome	3		30	0.308642		11.6679	0.00505194	1	0.0244853	0.00618263	,,
Flemming body	3		30	0.308642		11.6679	0.00505194	1	0.0243079	0.00618263	,,
sperm annulus	3		30	0.308642		11.6679	0.00505194	1	0.024133	0.00618263	,,
cell projection	12		431	1.23457		2.62987	0.00518334	1	0.0245838	0.00629813	,,,,,,,,,,,
catalytic step 2 spliceosome	12		432	1.23457		2.6238	0.00527665	1	0.0248489	0.00636604	,,,,,,,,,,,
glycogen granule	3		31	0.308642		11.3061	0.00554531	1	0.0259302	0.00664305	,,
cell projection membrane	4		61	0.411523		7.23557	0.00563338	1	0.0261578	0.0066714	,,,
actomyosin, actin portion	2		10	0.205761		24.7847	0.00572585	1	0.0264025	0.0066714	,
endothelial microparticle	2		10	0.205761		24.7847	0.00572585	1	0.0262204	0.0066714	,
phenylalanine-tRNA ligase complex	2		10	0.205761		24.7847	0.00572585	1	0.0260409	0.0066714	,
endocytic vesicle	9		283	0.925926		3.09369	0.00639645	1	0.0288928	0.00740205	,,,,,,,,
ER-mitochondrion membrane contact site	3		33	0.308642		10.6459	0.00661615	1	0.0296833	0.00756633	,,
axon cytoplasm	7		187	0.720165		3.75986	0.00662738	1	0.0295341	0.00756633	,,,,,,
Scrib-APC-beta-catenin complex	2		11	0.205761		22.7615	0.00694448	1	0.0307409	0.00787551	,
vesicle membrane	5		106	0.514403		4.9996	0.00816707	1	0.0359135	0.00920067	,,,,
azurophil granule	3		37	0.308642		9.53258	0.00910438	1	0.0397718	0.0101891	,,
mitotic spindle	7		199	0.720165		3.53455	0.00916751	1	0.0397858	0.0101927	,,,,,,
centrosome	40		2309	4.11523		1.53186	0.00928143	1	0.0400186	0.0102524	,,,,,,,,,,,,,,,,,,,,,,,,,,,,,,,,,,,,,,,
endosome membrane	24		1214	2.46914		1.78258	0.00943694	1	0.0404266	0.0103569	,,,,,,,,,,,,,,,,,,,,,,,
integrin alphav-beta5 complex	2		13	0.205761		19.5669	0.00969797	1	0.0412786	0.0105078	,
Ku70:Ku80 complex	2		13	0.205761		19.5669	0.00969797	1	0.0410156	0.0105078	,
nuclear envelope	19		900	1.95473		1.92767	0.0104332	1	0.0438459	0.0111918	,,,,,,,,,,,,,,,,,,
invadopodium	3		39	0.308642		9.05891	0.0105267	1	0.0439605	0.0111918	,,
cAMP-dependent protein kinase complex	3		39	0.308642		9.05891	0.0105267	1	0.0436857	0.0111918	,,
actomyosin	4		74	0.411523		5.98557	0.0110381	1	0.0455236	0.0114367	,,,
zonula adherens	4		74	0.411523		5.98557	0.0110381	1	0.0452426	0.0114367	,,,
endoplasmic reticulum-Golgi intermediate compartment membrane	9		310	0.925926		2.82532	0.0111955	1	0.0456064	0.0114367	,,,,,,,,
alphav-beta3 integrin-vitronectin complex	2		14	0.205761		18.2838	0.0112276	1	0.0454581	0.0114367	,
centralspindlin complex	2		14	0.205761		18.2838	0.0112276	1	0.0451826	0.0114367	,
proteasome activator complex	2		14	0.205761		18.2838	0.0112276	1	0.0449105	0.0114367	,
glial limiting end-foot	2		14	0.205761		18.2838	0.0112276	1	0.0446415	0.0114367	,
translation initiation ternary complex	1		1	0.102881		85.7932	0.0116411	1	0.0460102	0.0117176
eukaryotic 48S preinitiation complex	1		1	0.102881		85.7932	0.0116411	1	0.045738	0.0117176
septin complex	3		41	0.308642		8.63009	0.0120704	1	0.0471456	0.0120076	,,
insulin-responsive compartment	3		41	0.308642		8.63009	0.0120704	1	0.0468699	0.0120076	,,
muscle cell projection membrane	2		15	0.205761		17.1586	0.0128558	1	0.0496293	0.0127145	,
dendritic shaft	7		215	0.720165		3.27304	0.0135772	1	0.0521114	0.0133501	,,,,,,
postsynaptic density	22		1122	2.26337		1.77582	0.0136554	1	0.0521101	0.0133501	,,,,,,,,,,,,,,,,,,,,,
nuclear periphery	5		121	0.514403		4.38616	0.0139174	1	0.0528064	0.0135285	,,,,
microtubule end	2		16	0.205761		16.1639	0.01458	1	0.0550062	0.0139692	,
neuromuscular junction	10		380	1.02881		2.5316	0.014604	1	0.0547857	0.0139692	,,,,,,,,,
F-actin capping protein complex	3		44	0.308642		8.05793	0.0146171	1	0.0545267	0.0139692	,,
extracellular space	95		6526	9.77366		1.2651	0.0150528	1	0.0558384	0.0142634	,,,,,,,,,,,,,,,,,,,,,,,,,,,,,,,,,,,,,,,,,,,,,,,,,,,,,,,,,,,,,,,,,,,,,,,,,,,,,,,,,,,,,,,,,,,,,,
intermediate filament	10		382	1.02881		2.51839	0.0150927	1	0.0556752	0.0142634	,,,,,,,,,
extrinsic component of membrane	12		499	1.23457		2.27238	0.0152558	1	0.055966	0.0143252	,,,,,,,,,,,
cortical cytoskeleton	5		124	0.514403		4.2811	0.0153265	1	0.0559163	0.0143252	,,,,
sarcolemma	13		560	1.33745		2.17827	0.0154676	1	0.0561228	0.014356	,,,,,,,,,,,,
WASH complex	3		45	0.308642		7.8837	0.0155282	1	0.0560365	0.014356	,,
dendrite	31		1758	3.1893		1.57273	0.0162352	1	0.0582711	0.0149285	,,,,,,,,,,,,,,,,,,,,,,,,,,,,,,
microspike	2		17	0.205761		15.2782	0.0163977	1	0.0585382	0.014983	,
dense body	3		46	0.308642		7.71685	0.0164706	1	0.0584839	0.014983	,,
inclusion body	4		84	0.411523		5.28345	0.0169114	1	0.0597295	0.0153021	,,,
endoplasmic reticulum membrane	66		4341	6.79012		1.32871	0.0176166	1	0.061891	0.0158559	,,,,,,,,,,,,,,,,,,,,,,,,,,,,,,,,,,,,,,,,,,,,,,,,,,,,,,,,,,,,,,,,,
mitochondrial nucleoid	7		227	0.720165		3.10096	0.0177566	1	0.0620547	0.0158978	,,,,,,
platelet alpha granule membrane	4		86	0.411523		5.16234	0.0182799	1	0.063549	0.01597	,,,
integrin alphav-beta3 complex	2		18	0.205761		14.4846	0.0183067	1	0.0633106	0.01597	,
actin cap	2		18	0.205761		14.4846	0.0183067	1	0.0629825	0.01597	,
storage vacuole	2		18	0.205761		14.4846	0.0183067	1	0.0626579	0.01597	,
UBC13-UEV1A complex	2		18	0.205761		14.4846	0.0183067	1	0.0623366	0.01597	,
COPII vesicle coat	3		48	0.308642		7.40348	0.0184497	1	0.0625031	0.0160127	,,
Golgi membrane	61		3982	6.27572		1.34077	0.0191449	1	0.064529	0.0165317	,,,,,,,,,,,,,,,,,,,,,,,,,,,,,,,,,,,,,,,,,,,,,,,,,,,,,,,,,,,,
actomyosin contractile ring	2		19	0.205761		13.7693	0.0203044	1	0.0680916	0.0172699	,
proteasome storage granule	2		19	0.205761		13.7693	0.0203044	1	0.0677494	0.0172699	,
integrin alpha1-beta1 complex	2		19	0.205761		13.7693	0.0203044	1	0.0674107	0.0172699	,
SCAR complex	3		50	0.308642		7.11456	0.0205549	1	0.0679027	0.017396	,,
sodium:potassium-exchanging ATPase complex	3		51	0.308642		6.9784	0.0216549	1	0.0711823	0.0179987	,,
nuclear envelope lumen	3		51	0.308642		6.9784	0.0216549	1	0.0708316	0.0179987	,,
pore complex	3		51	0.308642		6.9784	0.0216549	1	0.0704844	0.0179987	,,
cell cortex	16		777	1.64609		1.90162	0.0216903	1	0.0702553	0.0179987	,,,,,,,,,,,,,,,
extrinsic component of endosome membrane	2		20	0.205761		13.1213	0.0223886	1	0.0721653	0.018486	,
external side of plasma membrane	21		1115	2.16049		1.7101	0.0231431	1	0.0742368	0.018486	,,,,,,,,,,,,,,,,,,,,
lumenal side of lysosomal membrane	1		2	0.102881		59.3953	0.0231469	1	0.073892	0.018486
laminin-8 complex	1		2	0.102881		59.3953	0.0231469	1	0.0735385	0.018486
tricarboxylic acid cycle enzyme complex	1		2	0.102881		59.3953	0.0231469	1	0.0731883	0.018486
serine/threonine protein kinase complex	1		2	0.102881		59.3953	0.0231469	1	0.0728414	0.018486
HSP90-CDC37 chaperone complex	1		2	0.102881		59.3953	0.0231469	1	0.0724978	0.018486
tubulobulbar complex	1		2	0.102881		59.3953	0.0231469	1	0.0721575	0.018486
endoplasmic reticulum	67		4486	6.893		1.30489	0.0235809	1	0.073167	0.0186733	,,,,,,,,,,,,,,,,,,,,,,,,,,,,,,,,,,,,,,,,,,,,,,,,,,,,,,,,,,,,,,,,,,
filopodium tip	4		93	0.411523		4.77893	0.0236009	1	0.0728884	0.0186733	,,,
spectrin	3		53	0.308642		6.72113	0.0239496	1	0.0736228	0.0188614	,,
protein phosphatase type 2A complex	4		94	0.411523		4.72876	0.0244297	1	0.0747526	0.0189882	,,,
integrin alpha2-beta1 complex	2		21	0.205761		12.5316	0.0245571	1	0.0747977	0.0189882	,
macropinosome	2		21	0.205761		12.5316	0.0245571	1	0.0744561	0.0189882	,
clathrin coat of coated pit	2		21	0.205761		12.5316	0.0245571	1	0.0741177	0.0189882	,
intracellular membrane-bounded organelle	48		3066	4.93827		1.37756	0.0251966	1	0.0757039	0.0193946	,,,,,,,,,,,,,,,,,,,,,,,,,,,,,,,,,,,,,,,,,,,,,,,
phagocytic vesicle membrane	15		731	1.54321		1.90391	0.0263169	1	0.0787136	0.0201656	,,,,,,,,,,,,,,
organelle membrane contact site	2		22	0.205761		11.9926	0.0268075	1	0.0798213	0.0204068	,
early endosome membrane	20		1065	2.05761		1.70983	0.0268715	1	0.0796548	0.0204068	,,,,,,,,,,,,,,,,,,,
preribosome, large subunit precursor	4		97	0.411523		4.58437	0.0270206	1	0.0797408	0.0204288	,,,
T-tubule	7		249	0.720165		2.82835	0.027628	1	0.0811726	0.0207956	,,,,,,
stereocilium	5		145	0.514403		3.66638	0.0278883	1	0.0815764	0.0208305	,,,,
non-motile cilium	4		98	0.411523		4.53818	0.0279193	1	0.0813088	0.0208305	,,,
ribbon synapse	2		23	0.205761		11.4981	0.0291376	1	0.0844864	0.0215504	,
integrin alpha3-beta1 complex	2		23	0.205761		11.4981	0.0291376	1	0.084119	0.0215504	,
oligosaccharyltransferase complex	3		58	0.308642		6.15394	0.0302382	1	0.0869185	0.0222676	,,
sarcomere	6		200	0.617284		3.09069	0.0304773	1	0.0872283	0.022347	,,,,,
R2TP complex	2		24	0.205761		11.0427	0.0315454	1	0.0898976	0.0228348	,
proton-transporting V-type ATPase, V1 domain	2		24	0.205761		11.0427	0.0315454	1	0.0895134	0.0228348	,
retromer, cargo-selective complex	2		24	0.205761		11.0427	0.0315454	1	0.0891325	0.0228348	,
clathrin-coated pit	9		374	0.925926		2.34345	0.0326563	1	0.0918804	0.0235388	,,,,,,,,
nuclear matrix	13		627	1.33745		1.94597	0.034303	1	0.0961062	0.0243652	,,,,,,,,,,,,
NuRD complex	3		61	0.308642		5.85737	0.0343873	1	0.0959376	0.0243652	,,
replisome	1		3	0.102881		45.4199	0.0345188	1	0.0959017	0.0243652
mitochondrial proton-transporting ATP synthase, catalytic core	1		3	0.102881		45.4199	0.0345188	1	0.0955021	0.0243652
PCNA complex	1		3	0.102881		45.4199	0.0345188	1	0.0951059	0.0243652
clathrin-coated endocytic vesicle membrane	15		760	1.54321		1.83138	0.0351481	1	0.0964394	0.0247068	,,,,,,,,,,,,,,
tetraspanin-enriched microdomain	2		26	0.205761		10.2322	0.0365853	1	0.0999697	0.0256112	,
SNARE complex	6		212	0.617284		2.91677	0.0387501	1	0.105451	0.0268975	,,,,,
recycling endosome	12		574	1.23457		1.97611	0.0387795	1	0.1051	0.0268975	,,,,,,,,,,,
clathrin coat of trans-Golgi network vesicle	2		27	0.205761		9.87002	0.0392133	1	0.105844	0.0268975	,
phosphopyruvate hydratase complex	2		27	0.205761		9.87002	0.0392133	1	0.105416	0.0268975	,
myosin II filament	2		27	0.205761		9.87002	0.0392133	1	0.104991	0.0268975	,
bleb	3		67	0.308642		5.34243	0.0435172	1	0.116046	0.0297298	,,
manchette	2		29	0.205761		9.21745	0.0446755	1	0.118658	0.0298237	,
tRNA-splicing ligase complex	2		29	0.205761		9.21745	0.0446755	1	0.118185	0.0298237	,
rough endoplasmic reticulum membrane	2		29	0.205761		9.21745	0.0446755	1	0.117716	0.0298237	,
proton-transporting two-sector ATPase complex, catalytic domain	1		4	0.102881		36.7685	0.0457586	1	0.120094	0.0298237
extrinsic component of lysosome membrane	1		4	0.102881		36.7685	0.0457586	1	0.119621	0.0298237
myosin I complex	1		4	0.102881		36.7685	0.0457586	1	0.119152	0.0298237
chromosome, centromeric core domain	1		4	0.102881		36.7685	0.0457586	1	0.118686	0.0298237
glucosidase II complex	1		4	0.102881		36.7685	0.0457586	1	0.118224	0.0298237
mitotic spindle microtubule	1		4	0.102881		36.7685	0.0457586	1	0.117766	0.0298237
UBC13-MMS2 complex	1		4	0.102881		36.7685	0.0457586	1	0.117311	0.0298237
proteasome core complex, beta-subunit complex	1		4	0.102881		36.7685	0.0457586	1	0.11686	0.0298237
interleukin-18 receptor complex	1		4	0.102881		36.7685	0.0457586	1	0.116413	0.0298237
lateral loop	2		30	0.205761		8.92249	0.0475058	1	0.120396	0.0308443	,
endocytic vesicle membrane	17		935	1.74897		1.67234	0.0497693	1	0.125653	0.0321911	,,,,,,,,,,,,,,,,
platelet alpha granule	3		71	0.308642		5.04666	0.0502065	1	0.126277	0.0323509	,,
nuclear membrane	22		1291	2.26337		1.54358	0.0515287	1	0.129113	0.0330776	,,,,,,,,,,,,,,,,,,,,,
gamma-secretase complex	2		32	0.205761		8.3858	0.0533551	1	0.133187	0.0340883	,
endoplasmic reticulum exit site	4		121	0.411523		3.68437	0.053504	1	0.133059	0.0340883	,,,
annulate lamellae	2		33	0.205761		8.14096	0.0563705	1	0.139664	0.0347976	,
outer dense fiber	2		33	0.205761		8.14096	0.0563705	1	0.139145	0.0347976	,
COPI-coated vesicle	2		33	0.205761		8.14096	0.0563705	1	0.13863	0.0347976	,
VCP-NPL4-UFD1 AAA ATPase complex	2		33	0.205761		8.14096	0.0563705	1	0.138118	0.0347976	,
presynapse	7		292	0.720165		2.41362	0.0563841	1	0.137644	0.0347976	,,,,,,
sperm head plasma membrane	1		5	0.102881		30.8856	0.0568675	1	0.138315	0.0347976
outer dense plaque of desmosome	1		5	0.102881		30.8856	0.0568675	1	0.13781	0.0347976
ooplasm	1		5	0.102881		30.8856	0.0568675	1	0.137309	0.0347976
citrate lyase complex	1		5	0.102881		30.8856	0.0568675	1	0.136812	0.0347976
photoreceptor cell terminal bouton	1		5	0.102881		30.8856	0.0568675	1	0.136318	0.0347976
inner dense plaque of desmosome	1		5	0.102881		30.8856	0.0568675	1	0.135828	0.0347976
endoplasmic reticulum tubular network	3		75	0.308642		4.78192	0.0573636	1	0.136521	0.0349099	,,
spliceosomal complex	10		481	1.02881		2.0014	0.0574615	1	0.136266	0.0349099	,,,,,,,,,
Golgi-associated vesicle	3		76	0.308642		4.72002	0.0592243	1	0.139946	0.0356058	,,
exocyst	3		76	0.308642		4.72002	0.0592243	1	0.13945	0.0356058	,,
somatodendritic compartment	2		34	0.205761		7.91001	0.0594441	1	0.139473	0.0356058	,
clathrin coat	2		34	0.205761		7.91001	0.0594441	1	0.138982	0.0356058	,
basal plasma membrane	5		181	0.514403		2.94215	0.0615155	1	0.14332	0.0367172	,,,,
microtubule organizing center	15		824	1.54321		1.68935	0.0618676	1	0.143637	0.0367983	,,,,,,,,,,,,,,
hemidesmosome	3		78	0.308642		4.6009	0.0630296	1	0.145825	0.0373588	,,
Schwann cell microvillus	2		36	0.205761		7.48531	0.0657584	1	0.15161	0.0387064	,
RISC complex	2		36	0.205761		7.48531	0.0657584	1	0.151085	0.0387064	,
calcium ion-transporting ATPase complex	1		6	0.102881		26.6255	0.0678473	1	0.155347	0.0393908
integrin alpha4-beta7 complex	1		6	0.102881		26.6255	0.0678473	1	0.154813	0.0393908
macropinocytic cup	1		6	0.102881		26.6255	0.0678473	1	0.154283	0.0393908
eukaryotic translation initiation factor 3 complex, eIF3e	1		6	0.102881		26.6255	0.0678473	1	0.153756	0.0393908
endoplasmic reticulum lumen	19		1120	1.95473		1.54944	0.0688476	1	0.155493	0.0398356	,,,,,,,,,,,,,,,,,,
axon terminus	5		189	0.514403		2.81844	0.0711535	1	0.160156	0.0410303	,,,,
extrinsic component of plasma membrane	4		135	0.411523		3.30579	0.0736595	1	0.165236	0.0423319	,,,
dystrophin-associated glycoprotein complex	3		84	0.308642		4.27708	0.0750994	1	0.167899	0.043014	,,
dynactin complex	2		39	0.205761		6.9274	0.0756226	1	0.168501	0.0431683	,
zymogen granule	1		7	0.102881		23.3982	0.0786994	1	0.174771	0.0431857
cytoplasmic periphery of the nuclear pore complex	1		7	0.102881		23.3982	0.0786994	1	0.174188	0.0431857
gamma-catenin-TCF7L2 complex	1		7	0.102881		23.3982	0.0786994	1	0.173609	0.0431857
cyclin-dependent protein kinase 5 holoenzyme complex	1		7	0.102881		23.3982	0.0786994	1	0.173034	0.0431857
PCNA-p21 complex	1		7	0.102881		23.3982	0.0786994	1	0.172463	0.0431857
translation release factor complex	1		7	0.102881		23.3982	0.0786994	1	0.171896	0.0431857
cell projection cytoplasm	1		7	0.102881		23.3982	0.0786994	1	0.171333	0.0431857
cytoplasmic side of endoplasmic reticulum membrane	1		7	0.102881		23.3982	0.0786994	1	0.170773	0.0431857
nascent polypeptide-associated complex	1		7	0.102881		23.3982	0.0786994	1	0.170216	0.0431857
endosome to plasma membrane transport vesicle	1		7	0.102881		23.3982	0.0786994	1	0.169664	0.0431857
interleukin-5 receptor complex	1		7	0.102881		23.3982	0.0786994	1	0.169115	0.0431857
cleavage body	1		7	0.102881		23.3982	0.0786994	1	0.168569	0.0431857
myosin II complex	2		40	0.205761		6.75947	0.0790089	1	0.168688	0.0432161	,
spindle midzone	4		139	0.411523		3.21151	0.0800328	1	0.170326	0.0436359	,,,
apical dendrite	3		89	0.308642		4.04012	0.0858737	1	0.182173	0.0465469	,,
protein phosphatase type 1 complex	2		42	0.205761		6.44689	0.0859193	1	0.181689	0.0465469	,
chaperone-mediated autophagy translocation complex	1		8	0.102881		20.8686	0.0894253	1	0.188503	0.047695
longitudinal sarcoplasmic reticulum	1		8	0.102881		20.8686	0.0894253	1	0.187906	0.047695
vacuolar proton-transporting V-type ATPase, V1 domain	1		8	0.102881		20.8686	0.0894253	1	0.187314	0.047695
mitochondrial fatty acid beta-oxidation multienzyme complex	1		8	0.102881		20.8686	0.0894253	1	0.186725	0.047695
nuclear telomere cap complex	2		43	0.205761		6.3012	0.0894404	1	0.186171	0.047695	,
unconventional myosin complex	2		45	0.205761		6.02871	0.0966069	1	0.200459	0.0513556	,
laminin-11 complex	1		9	0.102881		18.8327	0.100026	1	0.206908	0.0524721
sperm mitochondrial sheath	1		9	0.102881		18.8327	0.100026	1	0.206266	0.0524721
large ribosomal subunit	1		9	0.102881		18.8327	0.100026	1	0.205627	0.0524721
TRAF2-GSTP1 complex	1		9	0.102881		18.8327	0.100026	1	0.204992	0.0524721
muscle thin filament tropomyosin	2		46	0.205761		5.90112	0.100249	1	0.204817	0.0524721	,
ribonucleoprotein granule	2		47	0.205761		5.77882	0.10393	1	0.211685	0.053737	,
melanosome membrane	2		47	0.205761		5.77882	0.10393	1	0.211038	0.053737	,
leading edge membrane	2		47	0.205761		5.77882	0.10393	1	0.210394	0.053737	,
invadopodium membrane	2		47	0.205761		5.77882	0.10393	1	0.209755	0.053737	,
ciliary base	4		154	0.411523		2.90122	0.10623	1	0.213748	0.05476	,,,
kinesin complex	7		342	0.720165		2.06204	0.10708	1	0.214807	0.0550315	,,,,,,
adherens junction	6		278	0.617284		2.2274	0.108033	1	0.216066	0.0552879	,,,,,
Myb complex	1		10	0.102881		17.1586	0.110504	1	0.220345	0.0552879
angiogenin-PRI complex	1		10	0.102881		17.1586	0.110504	1	0.219685	0.0552879
interleukin-1 receptor complex	1		10	0.102881		17.1586	0.110504	1	0.219029	0.0552879
ciliary pocket membrane	1		10	0.102881		17.1586	0.110504	1	0.218378	0.0552879
laminin-2 complex	1		10	0.102881		17.1586	0.110504	1	0.21773	0.0552879
mitochondrial electron transfer flavoprotein complex	1		10	0.102881		17.1586	0.110504	1	0.217085	0.0552879
mitochondrion-derived vesicle	1		10	0.102881		17.1586	0.110504	1	0.216445	0.0552879
proton-transporting ATP synthase complex, catalytic core F(1)	1		10	0.102881		17.1586	0.110504	1	0.215808	0.0552879
cytoplasmic mRNA processing body	8		413	0.823045		1.91572	0.11232	1	0.218712	0.0560318	,,,,,,,
cytosolic ribosome	2		50	0.205761		5.44055	0.115183	1	0.22363	0.0572917	,
axolemma	3		102	0.308642		3.53144	0.116654	1	0.225825	0.0578542	,,
mitochondrial outer membrane	13		769	1.33745		1.58722	0.118473	1	0.228681	0.0582424	,,,,,,,,,,,,
platelet dense tubular network membrane	2		51	0.205761		5.33642	0.119	1	0.229032	0.0582424	,
nuclear lamina	2		51	0.205761		5.33642	0.119	1	0.22837	0.0582424	,
beta-catenin-TCF complex	1		11	0.102881		15.7579	0.12086	1	0.231272	0.0582424
mitochondrial permeability transition pore complex	1		11	0.102881		15.7579	0.12086	1	0.230607	0.0582424
ESCRT-0 complex	1		11	0.102881		15.7579	0.12086	1	0.229946	0.0582424
cytoplasmic side of apical plasma membrane	1		11	0.102881		15.7579	0.12086	1	0.229289	0.0582424
BAX complex	1		11	0.102881		15.7579	0.12086	1	0.228636	0.0582424
procollagen-proline 4-dioxygenase complex	1		11	0.102881		15.7579	0.12086	1	0.227986	0.0582424
PCSK9-AnxA2 complex	1		11	0.102881		15.7579	0.12086	1	0.227341	0.0582424
nonhomologous end joining complex	2		52	0.205761		5.23621	0.122849	1	0.230428	0.0588671	,
sarcoplasm	2		52	0.205761		5.23621	0.122849	1	0.229779	0.0588671	,
HFE-transferrin receptor complex	2		53	0.205761		5.13969	0.126727	1	0.236368	0.060555	,
cytoplasmic side of plasma membrane	5		228	0.514403		2.33896	0.128929	1	0.239801	0.0614345	,,,,
sarcoplasmic reticulum lumen	2		54	0.205761		5.04666	0.130634	1	0.242294	0.0614345	,
Ski complex	1		12	0.102881		14.5687	0.131096	1	0.242472	0.0614345
viral replication complex	1		12	0.102881		14.5687	0.131096	1	0.241799	0.0614345
coated vesicle	1		12	0.102881		14.5687	0.131096	1	0.241129	0.0614345
aryl hydrocarbon receptor complex	1		12	0.102881		14.5687	0.131096	1	0.240463	0.0614345
germinal vesicle	1		12	0.102881		14.5687	0.131096	1	0.239801	0.0614345
synaptic vesicle	8		437	0.823045		1.81081	0.140875	1	0.256981	0.0650993	,,,,,,,
transforming growth factor beta receptor homodimeric complex	1		13	0.102881		13.5463	0.141212	1	0.25689	0.0650993
CAF-1 complex	1		13	0.102881		13.5463	0.141212	1	0.256188	0.0650993
integrin alphav-beta8 complex	1		13	0.102881		13.5463	0.141212	1	0.25549	0.0650993
symmetric synapse	1		13	0.102881		13.5463	0.141212	1	0.254796	0.0650993
nuclear outer membrane-endoplasmic reticulum membrane network	1		13	0.102881		13.5463	0.141212	1	0.254106	0.0650993
mast cell granule	3		112	0.308642		3.21961	0.142709	1	0.256104	0.0656113	,,
lysosomal lumen	8		440	0.823045		1.7985	0.144679	1	0.25894	0.0663377	,,,,,,,
lysosome	17		1103	1.74897		1.41791	0.150488	1	0.268612	0.068049	,,,,,,,,,,,,,,,,
platelet dense granule lumen	2		59	0.205761		4.62785	0.150558	1	0.268018	0.068049	,
nuclear chromosome, telomeric region	8		445	0.823045		1.77835	0.151128	1	0.268313	0.068049	,,,,,,,
stereocilium membrane	1		14	0.102881		12.658	0.151211	1	0.267744	0.068049
astral microtubule	1		14	0.102881		12.658	0.151211	1	0.267032	0.068049
IRE1-RACK1-PP2A complex	1		14	0.102881		12.658	0.151211	1	0.266324	0.068049
synaptobrevin 2-SNAP-25-syntaxin-1a complex	1		14	0.102881		12.658	0.151211	1	0.26562	0.068049
Swr1 complex	2		60	0.205761		4.55229	0.154613	1	0.270878	0.069032	,
spindle pole centrosome	2		60	0.205761		4.55229	0.154613	1	0.270165	0.069032	,
clathrin adaptor complex	2		60	0.205761		4.55229	0.154613	1	0.269456	0.069032	,
ESC/E(Z) complex	2		61	0.205761		4.47916	0.158688	1	0.275835	0.0699073	,
Ino80 complex	2		61	0.205761		4.47916	0.158688	1	0.275115	0.0699073	,
NuA4 histone acetyltransferase complex	3		118	0.308642		3.05762	0.159182	1	0.275252	0.0699073	,,
apical part of cell	7		382	0.720165		1.84682	0.160609	1	0.276998	0.0699073	,,,,,,
macromolecular complex	1		15	0.102881		11.8791	0.161094	1	0.277114	0.0699073
elongin complex	1		15	0.102881		11.8791	0.161094	1	0.276398	0.0699073
integrin alpha6-beta4 complex	1		15	0.102881		11.8791	0.161094	1	0.275686	0.0699073
methionine adenosyltransferase complex	1		15	0.102881		11.8791	0.161094	1	0.274977	0.0699073
U2AF	1		15	0.102881		11.8791	0.161094	1	0.274272	0.0699073
VCP-NSFL1C complex	1		15	0.102881		11.8791	0.161094	1	0.273571	0.0699073
host cell perinuclear region of cytoplasm	1		15	0.102881		11.8791	0.161094	1	0.272873	0.0699073
microtubule associated complex	4		181	0.411523		2.47141	0.161508	1	0.272879	0.0699088	,,,
dendrite cytoplasm	3		119	0.308642		3.03219	0.161982	1	0.272985	0.069936	,,
semaphorin receptor complex	2		62	0.205761		4.40835	0.162783	1	0.273641	0.070104	,
Sin3 complex	2		63	0.205761		4.33973	0.166897	1	0.279848	0.0715136	,
beta-catenin destruction complex	2		63	0.205761		4.33973	0.166897	1	0.279143	0.0715136	,
nuclear euchromatin	3		121	0.308642		2.98259	0.167627	1	0.279658	0.0716457	,,
cell-substrate junction	1		16	0.102881		11.1904	0.170861	1	0.28434	0.0723725
endolysosome lumen	1		16	0.102881		11.1904	0.170861	1	0.28363	0.0723725
clathrin complex	1		16	0.102881		11.1904	0.170861	1	0.282922	0.0723725
zymogen granule membrane	2		64	0.205761		4.27323	0.171029	1	0.282496	0.0723725	,
cell leading edge	5		253	0.514403		2.10898	0.174325	1	0.287225	0.0735842	,,,,
intracellular	35		2542	3.60082		1.22285	0.176994	1	0.290901	0.0745259	,,,,,,,,,,,,,,,,,,,,,,,,,,,,,,,,,,
axonemal microtubule	1		17	0.102881		10.5772	0.180515	1	0.295956	0.0752634
integrin alpha7-beta1 complex	1		17	0.102881		10.5772	0.180515	1	0.295227	0.0752634
ribonucleoside-diphosphate reductase complex	1		17	0.102881		10.5772	0.180515	1	0.294501	0.0752634
NatA complex	1		17	0.102881		10.5772	0.180515	1	0.29378	0.0752634
basal lamina	3		126	0.308642		2.86539	0.181979	1	0.295438	0.0755529	,,
rough endoplasmic reticulum	5		257	0.514403		2.07631	0.182098	1	0.29491	0.0755529	,,,,
Schmidt-Lanterman incisure	2		67	0.205761		4.08539	0.183521	1	0.296491	0.0759581	,
male germ cell nucleus	2		68	0.205761		4.0264	0.187714	1	0.30253	0.077505	,
basilar dendrite	1		18	0.102881		10.0278	0.190057	1	0.305564	0.0778116
asymmetric synapse	1		18	0.102881		10.0278	0.190057	1	0.304826	0.0778116
cuticular plate	1		18	0.102881		10.0278	0.190057	1	0.304091	0.0778116
axonal growth cone	3		129	0.308642		2.79939	0.190744	1	0.304456	0.0778116	,,
filamentous actin	3		129	0.308642		2.79939	0.190744	1	0.303726	0.0778116	,,
methylosome	2		69	0.205761		3.96908	0.19192	1	0.304869	0.0779179	,
90S preribosome	2		69	0.205761		3.96908	0.19192	1	0.304141	0.0779179	,
MPP7-DLG1-LIN7 complex	1		19	0.102881		9.53258	0.199488	1	0.31538	0.0804143
vacuolar proton-transporting V-type ATPase, V0 domain	1		19	0.102881		9.53258	0.199488	1	0.314631	0.0804143
tertiary granule	1		19	0.102881		9.53258	0.199488	1	0.313886	0.0804143
vacuolar membrane	2		71	0.205761		3.85921	0.200369	1	0.314527	0.0805787	,
late endosome membrane	12		780	1.23457		1.45505	0.202818	1	0.31762	0.0813711	,,,,,,,,,,,
trans-Golgi network membrane	15		1010	1.54321		1.37863	0.204158	1	0.318968	0.0817045	,,,,,,,,,,,,,,
intrinsic component of the cytoplasmic side of the plasma membrane	2		72	0.205761		3.80653	0.204609	1	0.318922	0.0817045	,
ubiquitin conjugating enzyme complex	1		20	0.102881		9.08399	0.208809	1	0.324705	0.083186
microtubule cytoskeleton	11		710	1.13169		1.47763	0.209416	1	0.324888	0.0832331	,,,,,,,,,,
pre-autophagosomal structure membrane	2		75	0.205761		3.65676	0.217386	1	0.336467	0.0860501	,
contractile fiber	1		21	0.102881		8.67572	0.218021	1	0.336665	0.0860501
integrin alpha11-beta1 complex	1		21	0.102881		8.67572	0.218021	1	0.335884	0.0860501
vesicle coat	1		22	0.102881		8.30257	0.227127	1	0.349102	0.0892298
integrin alpha10-beta1 complex	1		22	0.102881		8.30257	0.227127	1	0.348296	0.0892298
acrosomal membrane	2		78	0.205761		3.51833	0.230229	1	0.35224	0.0902403	,
cytoplasmic dynein complex	2		79	0.205761		3.47449	0.234521	1	0.357982	0.0902639	,
I band	3		144	0.308642		2.5103	0.235961	1	0.359353	0.0902639	,,
myofibril	3		144	0.308642		2.5103	0.235961	1	0.358531	0.0902639	,,
cytoplasmic side of lysosomal membrane	1		23	0.102881		7.9602	0.236126	1	0.357963	0.0902639
MHC class I peptide loading complex	1		23	0.102881		7.9602	0.236126	1	0.357147	0.0902639
nuclear pore cytoplasmic filaments	1		23	0.102881		7.9602	0.236126	1	0.356336	0.0902639
RNA nuclear export complex	1		23	0.102881		7.9602	0.236126	1	0.355528	0.0902639
compact myelin	1		23	0.102881		7.9602	0.236126	1	0.354723	0.0902639
periciliary membrane compartment	1		23	0.102881		7.9602	0.236126	1	0.353923	0.0902639
NURF complex	1		23	0.102881		7.9602	0.236126	1	0.353125	0.0902639
alveolar lamellar body	1		23	0.102881		7.9602	0.236126	1	0.352332	0.0902639
eukaryotic translation initiation factor 2B complex	1		24	0.102881		7.64494	0.245021	1	0.364784	0.0934541
perinuclear endoplasmic reticulum	2		83	0.205761		3.30953	0.251729	1	0.373933	0.0954844	,
Cul7-RING ubiquitin ligase complex	1		25	0.102881		7.3537	0.253812	1	0.376186	0.0954844
senescence-associated heterochromatin focus	1		25	0.102881		7.3537	0.253812	1	0.375348	0.0954844
clathrin-sculpted gamma-aminobutyric acid transport vesicle membrane	1		25	0.102881		7.3537	0.253812	1	0.374514	0.0954844
spermatoproteasome complex	1		25	0.102881		7.3537	0.253812	1	0.373684	0.0954844
DNA replication factor C complex	1		25	0.102881		7.3537	0.253812	1	0.372857	0.0954844
axon	18		1294	1.85185		1.27506	0.254273	1	0.372709	0.0954844	,,,,,,,,,,,,,,,,,
vacuole	2		84	0.205761		3.27071	0.256037	1	0.374468	0.0959349	,
spindle	10		671	1.02881		1.43574	0.25881	1	0.377691	0.0967607	,,,,,,,,,
AIM2 inflammasome complex	1		26	0.102881		7.08384	0.262501	1	0.382239	0.0970742
signal recognition particle, endoplasmic reticulum targeting	1		26	0.102881		7.08384	0.262501	1	0.381402	0.0970742
intermediate-density lipoprotein particle	1		26	0.102881		7.08384	0.262501	1	0.38057	0.0970742
Cdc73/Paf1 complex	1		26	0.102881		7.08384	0.262501	1	0.37974	0.0970742
prefoldin complex	1		26	0.102881		7.08384	0.262501	1	0.378915	0.0970742
sperm principal piece	2		87	0.205761		3.15952	0.268966	1	0.387404	0.0987474	,
mitochondrial proton-transporting ATP synthase complex	2		87	0.205761		3.15952	0.268966	1	0.386565	0.0987474	,
integral component of synaptic vesicle membrane	1		27	0.102881		6.83309	0.271089	1	0.388776	0.0987474
Bcl-2 family protein complex	1		27	0.102881		6.83309	0.271089	1	0.387938	0.0987474
beta-catenin-TCF7L2 complex	1		27	0.102881		6.83309	0.271089	1	0.387104	0.0987474
CatSper complex	1		27	0.102881		6.83309	0.271089	1	0.386273	0.0987474
lamin filament	1		27	0.102881		6.83309	0.271089	1	0.385446	0.0987474
lipopolysaccharide receptor complex	1		28	0.102881		6.59948	0.279577	1	0.396665	0.100974
nuclear stress granule	1		28	0.102881		6.59948	0.279577	1	0.39582	0.100974
platelet dense granule membrane	1		28	0.102881		6.59948	0.279577	1	0.394977	0.100974
mitochondrial inner membrane presequence translocase complex	1		28	0.102881		6.59948	0.279577	1	0.394139	0.100974
photoreceptor outer segment	4		231	0.411523		1.93935	0.283003	1	0.398123	0.101995	,,,
guanyl-nucleotide exchange factor complex	1		29	0.102881		6.38131	0.287967	1	0.404249	0.103346
actin filament bundle	1		29	0.102881		6.38131	0.287967	1	0.403396	0.103346
MMXD complex	1		30	0.102881		6.17711	0.296258	1	0.414138	0.105432
VCB complex	1		30	0.102881		6.17711	0.296258	1	0.413268	0.105432
histone pre-mRNA 3'end processing complex	1		30	0.102881		6.17711	0.296258	1	0.412402	0.105432
paraspeckles	1		30	0.102881		6.17711	0.296258	1	0.411539	0.105432
synapse	13		940	1.33745		1.29886	0.303705	1	0.421002	0.107673	,,,,,,,,,,,,
sperm fibrous sheath	1		31	0.102881		5.98557	0.304454	1	0.421161	0.107673
vacuolar proton-transporting V-type ATPase complex	1		31	0.102881		5.98557	0.304454	1	0.420285	0.107673
synaptic membrane	2		96	0.205761		2.86713	0.307662	1	0.423833	0.108582	,
cullin-RING ubiquitin ligase complex	1		32	0.102881		5.80556	0.312554	1	0.42968	0.108952
NLRP1 inflammasome complex	1		32	0.102881		5.80556	0.312554	1	0.428793	0.108952
integrin alpha8-beta1 complex	1		32	0.102881		5.80556	0.312554	1	0.427909	0.108952
terminal web	1		32	0.102881		5.80556	0.312554	1	0.427028	0.108952
intrinsic component of endoplasmic reticulum membrane	1		32	0.102881		5.80556	0.312554	1	0.426151	0.108952
commitment complex	1		32	0.102881		5.80556	0.312554	1	0.425278	0.108952
clathrin-coated vesicle	5		319	0.514403		1.67434	0.314954	1	0.427668	0.109564	,,,,
clathrin-coated endocytic vesicle	2		98	0.205761		2.80935	0.316216	1	0.428505	0.109779	,
ER to Golgi transport vesicle membrane	17		1273	1.74897		1.22874	0.317086	1	0.428809	0.109857	,,,,,,,,,,,,,,,,
Golgi medial cisterna	1		33	0.102881		5.63605	0.320559	1	0.432625	0.110834
photoreceptor inner segment	3		172	0.308642		2.1046	0.323937	1	0.436297	0.111775	,,
autophagosome membrane	2		101	0.205761		2.72692	0.329	1	0.442218	0.112835	,
high-density lipoprotein particle	2		101	0.205761		2.72692	0.329	1	0.441325	0.112835	,
U12-type spliceosomal complex	2		101	0.205761		2.72692	0.329	1	0.440435	0.112835	,
fibrillar center	1		35	0.102881		5.3251	0.336293	1	0.449292	0.115104
acrosomal vesicle	5		330	0.514403		1.61874	0.339995	1	0.453327	0.116138	,,,,
Golgi cis cisterna	1		36	0.102881		5.18214	0.344022	1	0.457777	0.116529
microtubule minus-end	1		36	0.102881		5.18214	0.344022	1	0.456861	0.116529
dendritic growth cone	1		36	0.102881		5.18214	0.344022	1	0.455949	0.116529
smooth endoplasmic reticulum membrane	1		36	0.102881		5.18214	0.344022	1	0.455041	0.116529
secretory granule	5		332	0.514403		1.60903	0.344567	1	0.454855	0.116529	,,,,
integral component of nuclear inner membrane	2		105	0.205761		2.62426	0.345939	1	0.455761	0.116761	,
Cul4B-RING E3 ubiquitin ligase complex	1		37	0.102881		5.04666	0.351662	1	0.462383	0.118224
IkappaB kinase complex	1		37	0.102881		5.04666	0.351662	1	0.461469	0.118224
M band	3		182	0.308642		1.98975	0.355629	1	0.465754	0.119322	,,
slit diaphragm	1		38	0.102881		4.91808	0.359212	1	0.469522	0.12005
kinocilium	1		38	0.102881		4.91808	0.359212	1	0.468599	0.12005
neurofibrillary tangle	1		39	0.102881		4.79589	0.366675	1	0.477397	0.122142
nuclear heterochromatin	2		110	0.205761		2.50632	0.366908	1	0.476765	0.122142	,
keratin filament	4		267	0.411523		1.67908	0.377164	1	0.489135	0.125311	,,,
meiotic spindle	1		41	0.102881		4.56887	0.381342	1	0.493588	0.126206
inhibitory synapse	1		41	0.102881		4.56887	0.381342	1	0.492628	0.126206
nuclear pericentric heterochromatin	1		42	0.102881		4.46323	0.388547	1	0.500962	0.127845
female pronucleus	1		42	0.102881		4.46323	0.388547	1	0.499991	0.127845
Derlin-1 retrotranslocation complex	1		42	0.102881		4.46323	0.388547	1	0.499024	0.127845
peroxisomal membrane	4		274	0.411523		1.63638	0.395491	1	0.506962	0.129879	,,,
nuclear nucleosome	2		118	0.205761		2.33818	0.399887	1	0.511609	0.131069	,
macrophage migration inhibitory factor receptor complex	1		44	0.102881		4.26596	0.402707	1	0.514226	0.131235
nuclear replication fork	1		44	0.102881		4.26596	0.402707	1	0.513239	0.131235
growth cone membrane	1		44	0.102881		4.26596	0.402707	1	0.512256	0.131235
sperm flagellum	2		120	0.205761		2.29961	0.408008	1	0.518006	0.132708	,
Wnt signalosome	1		45	0.102881		4.17372	0.409664	1	0.519117	0.132739
ESCRT III complex	1		45	0.102881		4.17372	0.409664	1	0.518128	0.132739
peroxisome	7		527	0.720165		1.33988	0.415539	1	0.524559	0.1342	,,,,,,
pericentriolar material	2		122	0.205761		2.2623	0.416074	1	0.524237	0.1342	,
AP-3 adaptor complex	1		46	0.102881		4.08539	0.41654	1	0.523831	0.1342
astrocyte projection	1		47	0.102881		4.00072	0.423336	1	0.531371	0.136132
centriole	8		615	0.823045		1.28777	0.425227	1	0.532737	0.136482	,,,,,,,
paranodal junction	1		48	0.102881		3.91949	0.430053	1	0.537769	0.137254
SMN complex	1		48	0.102881		3.91949	0.430053	1	0.536758	0.137254
dendritic spine membrane	1		48	0.102881		3.91949	0.430053	1	0.535751	0.137254
platelet alpha granule lumen	5		371	0.514403		1.44045	0.433697	1	0.539279	0.138158	,,,,
condensed chromosome, centromeric region	1		49	0.102881		3.84149	0.436691	1	0.541987	0.138593
NLRP3 inflammasome complex	1		49	0.102881		3.84149	0.436691	1	0.540976	0.138593
photoreceptor outer segment membrane	1		51	0.102881		3.69444	0.449738	1	0.556101	0.141939
autolysosome	1		51	0.102881		3.69444	0.449738	1	0.555067	0.141939
A band	1		51	0.102881		3.69444	0.449738	1	0.554037	0.141939
bicellular tight junction	7		550	0.720165		1.28398	0.458666	1	0.56399	0.144488	,,,,,,
apical junction complex	1		53	0.102881		3.55824	0.462483	1	0.567631	0.144886
Cul4A-RING E3 ubiquitin ligase complex	1		53	0.102881		3.55824	0.462483	1	0.566584	0.144886
NMDA selective glutamate receptor complex	1		53	0.102881		3.55824	0.462483	1	0.56554	0.144886
Z disc	10		808	1.02881		1.19268	0.466492	1	0.569394	0.145873	,,,,,,,,,
ciliary membrane	3		219	0.308642		1.65549	0.469794	1	0.572373	0.146636	,,
mRNA cap binding complex	1		55	0.102881		3.43173	0.474932	1	0.577573	0.14716
Prp19 complex	1		55	0.102881		3.43173	0.474932	1	0.576517	0.14716
dense core granule	1		55	0.102881		3.43173	0.474932	1	0.575465	0.14716
telomerase holoenzyme complex	1		55	0.102881		3.43173	0.474932	1	0.574417	0.14716
cytoplasmic microtubule	3		224	0.308642		1.61874	0.484574	1	0.585012	0.149874	,,
Golgi cisterna	1		57	0.102881		3.3139	0.487094	1	0.586988	0.15038
mitochondrial matrix	19		1594	1.95473		1.08905	0.490438	1	0.589947	0.151138	,,,,,,,,,,,,,,,,,,
receptor complex	9		739	0.925926		1.18795	0.491828	1	0.59055	0.151293	,,,,,,,,
hemoglobin complex	1		58	0.102881		3.25797	0.493069	1	0.590971	0.151401
transcription export complex	1		59	0.102881		3.2039	0.498974	1	0.596971	0.152938
protein-DNA complex	2		146	0.205761		1.89357	0.508093	1	0.606787	0.155453	,
juxtaparanode region of axon	1		61	0.102881		3.10096	0.510579	1	0.608662	0.155654
secretory granule lumen	1		61	0.102881		3.10096	0.510579	1	0.607571	0.155654
spectrin-associated cytoskeleton	1		62	0.102881		3.05193	0.516281	1	0.613257	0.15683
ciliary rootlet	1		62	0.102881		3.05193	0.516281	1	0.612162	0.15683
spindle pole	7		583	0.720165		1.21146	0.519185	1	0.614508	0.157431	,,,,,,
gap junction	1		63	0.102881		3.00443	0.521916	1	0.616641	0.157977
transport vesicle membrane	9		760	0.925926		1.15518	0.525239	1	0.619464	0.158701	,,,,,,,,
intrinsic component of membrane	1		65	0.102881		2.91373	0.532991	1	0.627493	0.160757
mitochondrial intermembrane space	4		333	0.411523		1.34754	0.54342	1	0.638639	0.163613	,,,
mitotic spindle midzone	1		68	0.102881		2.78751	0.549124	1	0.644202	0.165038
anchored component of membrane	6		513	0.617284		1.20953	0.551196	1	0.645492	0.165369	,,,,,
clathrin-coated vesicle membrane	1		69	0.102881		2.74783	0.554377	1	0.648074	0.165738
chylomicron	1		69	0.102881		2.74783	0.554377	1	0.646935	0.165738
spindle microtubule	2		162	0.205761		1.70798	0.563949	1	0.656951	0.168233	,
small nuclear ribonucleoprotein complex	1		71	0.102881		2.67176	0.5647	1	0.656674	0.168233
intermediate filament cytoskeleton	4		343	0.411523		1.30839	0.566679	1	0.657824	0.168271	,,,
Cajal body	3		254	0.308642		1.42849	0.568676	1	0.658989	0.168271	,,
fibrinogen complex	1		72	0.102881		2.63529	0.569772	1	0.659109	0.168271
photoreceptor disc membrane	1		72	0.102881		2.63529	0.569772	1	0.657963	0.168271
paranode region of axon	1		72	0.102881		2.63529	0.569772	1	0.65682	0.168271
U2-type prespliceosome	1		73	0.102881		2.59979	0.574784	1	0.66145	0.169457
condensed chromosome kinetochore	5		440	0.514403		1.2152	0.582293	1	0.668931	0.171174	,,,,
cilium	8		709	0.823045		1.11734	0.583547	1	0.669214	0.171174	,,,,,,,
low-density lipoprotein particle	1		75	0.102881		2.5316	0.584635	1	0.669307	0.171174
COP9 signalosome	1		75	0.102881		2.5316	0.584635	1	0.668155	0.171174
SMN-Sm protein complex	1		76	0.102881		2.49883	0.589475	1	0.672528	0.171892
chromosome, centromeric region	3		262	0.308642		1.38508	0.589629	1	0.67155	0.171892	,,
ER to Golgi transport vesicle	2		170	0.205761		1.62819	0.590117	1	0.670955	0.171892	,
brush border membrane	3		263	0.308642		1.37983	0.592202	1	0.672175	0.172204	,,
sarcoplasmic reticulum membrane	2		171	0.205761		1.61874	0.593305	1	0.672277	0.172231	,
anchored component of external side of plasma membrane	1		78	0.102881		2.43577	0.598986	1	0.677558	0.173473
Golgi stack	2		173	0.205761		1.60016	0.599624	1	0.677127	0.173473	,
endoplasmic reticulum quality control compartment	1		80	0.102881		2.37581	0.608277	1	0.685732	0.175677
kinetochore	4		368	0.411523		1.21981	0.62182	1	0.699811	0.178981	,,,
presynaptic membrane	4		368	0.411523		1.21981	0.62182	1	0.698627	0.178981	,,,
perikaryon	6		554	0.617284		1.12022	0.625486	1	0.701559	0.1793	,,,,,
P granule	1		84	0.102881		2.26434	0.626218	1	0.701196	0.1793
anchored component of plasma membrane	1		84	0.102881		2.26434	0.626218	1	0.700015	0.1793
chromosome, telomeric region	2		182	0.205761		1.52157	0.627144	1	0.699871	0.1793	,
mitochondrial inner membrane	21		1905	2.16049		1.00139	0.630257	1	0.702166	0.179888	,,,,,,,,,,,,,,,,,,,,
aggresome	2		184	0.205761		1.50514	0.633056	1	0.704102	0.180384	,
MLL1 complex	2		186	0.205761		1.48907	0.638894	1	0.709408	0.181205	,
neuronal cell body membrane	1		87	0.102881		2.18736	0.639134	1	0.708489	0.181205
heterochromatin	1		87	0.102881		2.18736	0.639134	1	0.707308	0.181205
MHC class II protein complex	7		655	0.720165		1.07854	0.640831	1	0.708006	0.181384	,,,,,,
mitochondrial membrane	4		380	0.411523		1.18141	0.646658	1	0.713258	0.182729	,,,
axon initial segment	1		90	0.102881		2.11545	0.651603	1	0.71752	0.183517
secretory granule membrane	1		90	0.102881		2.11545	0.651603	1	0.716332	0.183517
synaptonemal complex	1		94	0.102881		2.02661	0.667562	1	0.732663	0.187701
cell	2		198	0.205761		1.39939	0.672395	1	0.73675	0.188748	,
multivesicular body	1		98	0.102881		1.94493	0.682791	1	0.746908	0.19135
interstitial matrix	1		99	0.102881		1.92553	0.686488	1	0.749717	0.19207
very-low-density lipoprotein particle	1		103	0.102881		1.85165	0.700851	1	0.764146	0.195766
Golgi-associated vesicle membrane	1		106	0.102881		1.79986	0.71119	1	0.774147	0.198329
nucleosome	2		214	0.205761		1.29537	0.713085	1	0.774941	0.198532	,
motile cilium	3		320	0.308642		1.13501	0.721042	1	0.782307	0.200376	,,
integral component of lumenal side of endoplasmic reticulum membrane	12		1183	1.23457		0.959899	0.723397	1	0.783582	0.200376	,,,,,,,,,,,
node of Ranvier	1		110	0.102881		1.73514	0.724422	1	0.783414	0.200376
transcriptionally active chromatin	1		110	0.102881		1.73514	0.724422	1	0.78214	0.200376
chloride channel complex	2		221	0.205761		1.25457	0.729511	1	0.786356	0.201162	,
autophagosome	3		325	0.308642		1.11761	0.73067	1	0.786329	0.201162	,,
Cul4-RING E3 ubiquitin ligase complex	1		112	0.102881		1.7045	0.730809	1	0.785206	0.201162
intercellular bridge	2		223	0.205761		1.24338	0.734055	1	0.787419	0.201729	,
apicolateral plasma membrane	1		114	0.102881		1.67492	0.737048	1	0.789355	0.202225
microtubule plus-end	1		117	0.102881		1.63243	0.746137	1	0.797802	0.204389
replication fork	1		118	0.102881		1.61874	0.749096	1	0.799679	0.20487
peroxisomal matrix	2		232	0.205761		1.1954	0.753706	1	0.803308	0.205799	,
chromatin	4		441	0.411523		1.01846	0.755657	1	0.804096	0.206001	,,,
synaptic vesicle membrane	2		235	0.205761		1.18022	0.759972	1	0.807394	0.206846	,
histone methyltransferase complex	1		127	0.102881		1.50514	0.774227	1	0.821225	0.21039
calcium channel complex	1		129	0.102881		1.48203	0.779461	1	0.825458	0.211474
small-subunit processome	1		131	0.102881		1.45962	0.784574	1	0.829549	0.212522
desmosome	1		132	0.102881		1.44867	0.787086	1	0.830882	0.212864
intrinsic component of plasma membrane	1		138	0.102881		1.38625	0.801553	1	0.844812	0.216432
cell junction	24		2411	2.46914		0.898032	0.808893	1	0.851196	0.218068	,,,,,,,,,,,,,,,,,,,,,,,
site of double-strand break	1		144	0.102881		1.32898	0.815039	1	0.856307	0.219377
excitatory synapse	1		145	0.102881		1.3199	0.817196	1	0.857217	0.21961
centriolar satellite	1		147	0.102881		1.30209	0.821435	1	0.860304	0.220384
Golgi cisterna membrane	3		382	0.308642		0.951393	0.822665	1	0.860236	0.220384	,,
cornified envelope	1		150	0.102881		1.27626	0.827609	1	0.864045	0.22136
RNA polymerase II transcription factor complex	1		151	0.102881		1.26788	0.82962	1	0.864784	0.22146
axoneme	3		388	0.308642		0.936727	0.830587	1	0.864436	0.22146	,,
presynaptic active zone	1		153	0.102881		1.25144	0.833571	1	0.866183	0.221907
photoreceptor connecting cilium	1		158	0.102881		1.21215	0.843052	1	0.874666	0.224081
nuclear body	1		162	0.102881		1.18245	0.850247	1	0.880755	0.225641
nuclear chromosome	1		166	0.102881		1.15417	0.857113	1	0.886484	0.227108
nuclear chromatin	9		1053	0.925926		0.834129	0.864273	1	0.8925	0.228649	,,,,,,,,
sarcoplasmic reticulum	1		177	0.102881		1.08294	0.874415	1	0.90157	0.230973
Golgi lumen	3		454	0.308642		0.800925	0.899379	1	0.925873	0.237199	,,
nuclear inner membrane	1		202	0.102881		0.94974	0.906348	1	0.931603	0.238667
cis-Golgi network	1		222	0.102881		0.864657	0.925946	1	0.950275	0.243451
voltage-gated potassium channel complex	2		367	0.205761		0.75717	0.928014	1	0.950928	0.243618	,
MHC class I protein complex	3		502	0.308642		0.724533	0.932365	1	0.953914	0.244383	,,
ciliary basal body	3		508	0.308642		0.715996	0.935703	1	0.955856	0.244881	,,
SCF ubiquitin ligase complex	1		238	0.102881		0.806833	0.93863	1	0.957373	0.245269
integral component of endoplasmic reticulum membrane	3		539	0.308642		0.674912	0.950647	1	0.968144	0.248013	,,
transcriptional repressor complex	1		259	0.102881		0.741728	0.952044	1	0.968081	0.248013
ubiquitin ligase complex	3		560	0.308642		0.649659	0.958858	1	0.973519	0.249406	,,
postsynaptic membrane	7		1061	0.720165		0.666316	0.964015	1	0.977261	0.250364	,,,,,,
endomembrane system	3		593	0.308642		0.613582	0.969217	1	0.981037	0.251332	,,
nuclear speck	8		1210	0.823045		0.65518	0.971367	1	0.981717	0.251506	,,,,,,,
proteinaceous extracellular matrix	7		1204	0.720165		0.587259	0.986795	1	0.995793	0.255112	,,,,,,
PML body	2		640	0.205761		0.434819	0.995353	1	1	0.25619	,
integral component of plasma membrane	63		7293	6.48148		0.755693	0.996061	1	1	0.25619	,,,,,,,,,,,,,,,,,,,,,,,,,,,,,,,,,,,,,,,,,,,,,,,,,,,,,,,,,,,,,,
transcription factor complex	4		1025	0.411523		0.438893	0.997779	1	1	0.25619	,,,
extracellular region	54		6665	5.55556		0.711056	0.998675	1	1	0.25619	,,,,,,,,,,,,,,,,,,,,,,,,,,,,,,,,,,,,,,,,,,,,,,,,,,,,,
chromosome	1		609	0.102881		0.316321	0.999221	1	1	0.25619
integral component of membrane	59		15239	6.06996		0.33917	1	1	1	0.25619	,,,,,,,,,,,,,,,,,,,,,,,,,,,,,,,,,,,,,,,,,,,,,,,,,,,,,,,,,,

## Sheet: WM115 Molecular function
Analysis:Molecular function
Name of data set: WM115
Number of protein in data set: 973
Number of protein mapped to Molecular function : 937
Molecular function	No. of genes in the data set		No. of genes in the background data set	Percentage of genes		Fold Enrichment	Uncorrected p-value (Hypergeometric test)	Corrected p-value (Bonferroni method)	Corrected p-value (BH method)	Storey and Tibshirani method q-value	Genes mapped from input data set
cadherin binding involved in cell-cell adhesion	132		1716	14.0875		5.90865	1.6507e-60	1.67051e-57	1.67051e-57	5.8986e-58	,,,,,,,,,,,,,,,,,,,,,,,,,,,,,,,,,,,,,,,,,,,,,,,,,,,,,,,,,,,,,,,,,,,,,,,,,,,,,,,,,,,,,,,,,,,,,,,,,,,,,,,,,,,,,,,,,,,,,,,,,,,,,,,,,,,
poly(A) RNA binding	229		5947	24.4397		2.94758	1.06333e-50	1.07609e-47	5.38047e-48	1.89986e-48	,,,,,,,,,,,,,,,,,,,,,,,,,,,,,,,,,,,,,,,,,,,,,,,,,,,,,,,,,,,,,,,,,,,,,,,,,,,,,,,,,,,,,,,,,,,,,,,,,,,,,,,,,,,,,,,,,,,,,,,,,,,,,,,,,,,,,,,,,,,,,,,,,,,,,,,,,,,,,,,,,,,,,,,,,,,,,,,,,,,,,,,,,,,,,,,,,,,,,,,,,,,,,,,,,,,,,,,,,,,,,,,,,,,,
structural constituent of ribosome	56		650	5.97652		6.69395	2.14869e-28	2.17447e-25	7.24824e-26	2.55937e-26	,,,,,,,,,,,,,,,,,,,,,,,,,,,,,,,,,,,,,,,,,,,,,,,,,,,,,,,
GTP binding	84		1589	8.96478		4.0821	6.52523e-27	6.60354e-24	1.65088e-24	5.82931e-25	,,,,,,,,,,,,,,,,,,,,,,,,,,,,,,,,,,,,,,,,,,,,,,,,,,,,,,,,,,,,,,,,,,,,,,,,,,,,,,,,,,,
GTPase activity	64		1032	6.83031		4.80872	2.39821e-24	2.42698e-21	4.85397e-22	1.71395e-22	,,,,,,,,,,,,,,,,,,,,,,,,,,,,,,,,,,,,,,,,,,,,,,,,,,,,,,,,,,,,,,,
GDP binding	27		241	2.88154		8.87993	3.08743e-17	3.12448e-14	5.20747e-15	1.83877e-15	,,,,,,,,,,,,,,,,,,,,,,,,,,
translation initiation factor activity	24		242	2.56137		7.9043	2.74076e-14	2.77365e-11	3.96236e-12	1.39912e-12	,,,,,,,,,,,,,,,,,,,,,,,
RNA binding	72		2238	7.6841		2.49092	5.41997e-12	5.48501e-09	6.85626e-10	2.42096e-10	,,,,,,,,,,,,,,,,,,,,,,,,,,,,,,,,,,,,,,,,,,,,,,,,,,,,,,,,,,,,,,,,,,,,,,,
unfolded protein binding	28		435	2.98826		5.10558	8.84498e-12	8.95112e-09	9.94569e-10	3.51184e-10	,,,,,,,,,,,,,,,,,,,,,,,,,,,
ATP binding	174		7971	18.5699		1.67391	1.2171e-11	1.23171e-08	1.23171e-09	4.34919e-10	,,,,,,,,,,,,,,,,,,,,,,,,,,,,,,,,,,,,,,,,,,,,,,,,,,,,,,,,,,,,,,,,,,,,,,,,,,,,,,,,,,,,,,,,,,,,,,,,,,,,,,,,,,,,,,,,,,,,,,,,,,,,,,,,,,,,,,,,,,,,,,,,,,,,,,,,,,,,,,,,,,,,,,,,,,,,,
threonine-type endopeptidase activity	14		96	1.49413		11.9408	3.58594e-11	3.62897e-08	3.29906e-09	1.16491e-09	,,,,,,,,,,,,,
structural constituent of cytoskeleton	29		553	3.09498		4.15599	4.82394e-10	4.88183e-07	4.06819e-08	1.43649e-08	,,,,,,,,,,,,,,,,,,,,,,,,,,,,
identical protein binding	92		3881	9.81857		1.82903	4.29215e-08	4.34365e-05	3.34127e-06	1.17981e-06	,,,,,,,,,,,,,,,,,,,,,,,,,,,,,,,,,,,,,,,,,,,,,,,,,,,,,,,,,,,,,,,,,,,,,,,,,,,,,,,,,,,,,,,,,,,
protein binding involved in protein folding	12		117	1.28068		8.53237	5.25868e-08	5.32178e-05	3.80127e-06	1.34224e-06	,,,,,,,,,,,
protein transporter activity	19		335	2.02775		4.58583	1.39212e-07	0.000140882	9.39215e-06	3.31639e-06	,,,,,,,,,,,,,,,,,,
actin filament binding	27		654	2.88154		3.28296	2.53972e-07	0.00025702	1.60637e-05	5.67214e-06	,,,,,,,,,,,,,,,,,,,,,,,,,,
NAD binding	15		225	1.60085		5.46915	3.72952e-07	0.000377427	2.22016e-05	7.83943e-06	,,,,,,,,,,,,,,
S100 protein binding	8		56	0.853789		12.3033	6.9215e-07	0.000700455	3.89142e-05	1.37407e-05	,,,,,,,
ATPase activity	27		765	2.88154		2.80739	4.84493e-06	0.00490307	0.000258056	9.11203e-05	,,,,,,,,,,,,,,,,,,,,,,,,,,
protein kinase binding	45		1659	4.80256		2.12126	5.44613e-06	0.00551148	0.000275574	9.73058e-05	,,,,,,,,,,,,,,,,,,,,,,,,,,,,,,,,,,,,,,,,,,,,
structural molecule activity	29		866	3.09498		2.65605	5.97325e-06	0.00604493	0.000287854	0.000101642	,,,,,,,,,,,,,,,,,,,,,,,,,,,,
nuclear localization sequence binding	10		128	1.06724		6.62791	8.09098e-06	0.00818807	0.000372185	0.000127876	,,,,,,,,,
proteasome-activating ATPase activity	6		37	0.640342		14.4332	8.23066e-06	0.00832943	0.000362149	0.000127876	,,,,,
protein complex binding	20		492	2.13447		3.28055	1.10027e-05	0.0111347	0.000463947	0.000163821	,,,,,,,,,,,,,,,,,,,
actin binding	29		898	3.09498		2.56153	1.17438e-05	0.0118847	0.000475387	0.00016786	,,,,,,,,,,,,,,,,,,,,,,,,,,,,
RNA helicase activity	6		41	0.640342		13.0667	1.52247e-05	0.0154074	0.000592592	0.000206481	,,,,,
ADP binding	12		200	1.28068		5.01343	1.56014e-05	0.0157886	0.000584764	0.000206481	,,,,,,,,,,,
translation elongation factor activity	8		85	0.853789		8.16653	1.67878e-05	0.0169892	0.000606758	0.000214248	,,,,,,,
MHC class II protein complex binding	9		116	0.960512		6.6568	2.41235e-05	0.024413	0.000841829	0.000297251	,,,,,,,,
double-stranded RNA binding	16		362	1.70758		3.61608	3.0116e-05	0.0304774	0.00101591	0.000358721	,,,,,,,,,,,,,,,
ribosome binding	13		257	1.38741		4.20174	4.21245e-05	0.04263	0.00137516	0.000485572	,,,,,,,,,,,,
translation factor activity, RNA binding	9		135	0.960512		5.72852	7.93449e-05	0.080297	0.00250928	0.000886033	,,,,,,,,
large ribosomal subunit rRNA binding	4		19	0.426894		19.7419	9.73911e-05	0.0985598	0.00298666	0.0010546	,,,
protein domain specific binding	19		539	2.02775		2.8542	0.000119799	0.121236	0.00356578	0.00120512	,,,,,,,,,,,,,,,,,,
actin-dependent ATPase activity	7		84	0.747065		7.3691	0.000123126	0.124603	0.0035601	0.00120512	,,,,,,
calcium-dependent phospholipid binding	11		211	1.17396		4.39484	0.000123366	0.124846	0.00346796	0.00120512	,,,,,,,,,,
calcium-dependent protein binding	12		248	1.28068		4.04795	0.000124782	0.126279	0.00341294	0.00120512	,,,,,,,,,,,
GTPase binding	8		113	0.853789		6.1651	0.000129469	0.131022	0.00344796	0.00121748	,,,,,,,
cAMP-dependent protein kinase regulator activity	4		22	0.426894		17.1946	0.00017814	0.180278	0.00462251	0.00163222	,,,
AMP binding	6		69	0.640342		7.85862	0.000297436	0.301005	0.00752513	0.00264748	,,,,,
phosphatidylethanolamine binding	5		45	0.533618		10.2902	0.000303764	0.307409	0.00749778	0.00264748	,,,,
translation regulator activity	4		26	0.426894		14.6706	0.000349221	0.353411	0.00841455	0.0029712	,,,
proton-transporting ATPase activity, rotational mechanism	6		72	0.640342		7.53677	0.000375003	0.379503	0.00882566	0.00311636	,,,,,
ubiquitin protein ligase binding	37		1540	3.94877		1.88979	0.000392953	0.397669	0.00903793	0.00319131	,,,,,,,,,,,,,,,,,,,,,,,,,,,,,,,,,,,,
poly(A) binding	6		74	0.640342		7.33646	0.000434916	0.440135	0.00978079	0.00345362	,,,,,
rRNA binding	8		138	0.853789		5.05826	0.000504541	0.510596	0.0110999	0.0039194	,,,,,,,
6-phosphofructokinase activity	3		13	0.320171		22.7106	0.00058297	0.589966	0.0125525	0.0044323	,,
ATPase activity, coupled	5		52	0.533618		8.93748	0.000599203	0.606394	0.0126332	0.0044552	,,,,
enzyme binding	39		1692	4.16222		1.81009	0.000610917	0.618248	0.0126173	0.0044552	,,,,,,,,,,,,,,,,,,,,,,,,,,,,,,,,,,,,,,
tRNA binding	11		257	1.17396		3.61202	0.000660977	0.668909	0.0133782	0.00472386	,,,,,,,,,,
protein disulfide isomerase activity	7		111	0.747065		5.59658	0.000681204	0.689378	0.0135172	0.00475509	,,,,,,
Rac GTPase binding	8		145	0.853789		4.81616	0.000699198	0.707588	0.0136075	0.00475509	,,,,,,,
TBP-class protein binding	6		81	0.640342		6.71208	0.000705267	0.71373	0.0134666	0.00475509	,,,,,
vinculin binding	5		58	0.533618		8.03242	0.000990398	1	0.0185608	0.00655385	,,,,
poly-pyrimidine tract binding	2		4	0.213447		47.1388	0.00101306	1	0.0186402	0.00658191	,
mRNA binding	19		644	2.02775		2.38975	0.00104703	1	0.0189213	0.00668114	,,,,,,,,,,,,,,,,,,
integrin binding	16		499	1.70758		2.62577	0.00108756	1	0.019309	0.00681805	,,,,,,,,,,,,,,,
glucose binding	5		60	0.533618		7.77014	0.00115538	1	0.0201594	0.00700313	,,,,
myosin binding	6		89	0.640342		6.1171	0.00115628	1	0.0198332	0.00700313	,,,,,
signal transducer activity	28		1129	2.98826		1.97063	0.00120394	1	0.0203064	0.00717023	,,,,,,,,,,,,,,,,,,,,,,,,,,,
thioredoxin peroxidase activity	4		36	0.426894		10.7322	0.00124032	1	0.0205771	0.00726582	,,,
virus receptor activity	15		466	1.60085		2.64825	0.00147656	1	0.0241013	0.00851021	,,,,,,,,,,,,,,
low-density lipoprotein particle receptor binding	5		64	0.533618		7.29381	0.00154519	1	0.0248212	0.00876442	,,,,
5S rRNA binding	3		18	0.320171		16.8118	0.00158396	1	0.0250463	0.0088439	,,
ion channel binding	16		524	1.70758		2.50079	0.00178569	1	0.0278018	0.00981689	,,,,,,,,,,,,,,,
microfilament motor activity	6		99	0.640342		5.50692	0.00199757	1	0.0306294	0.0108153	,,,,,
kinase binding	12		348	1.28068		2.88891	0.00242834	1	0.0366788	0.0128645	,,,,,,,,,,,
myosin V binding	5		71	0.533618		6.58714	0.00244804	1	0.0364327	0.0128645	,,,,
glutathione binding	4		44	0.426894		8.83478	0.00263157	1	0.0385964	0.0136285	,,,
ribose phosphate diphosphokinase activity	3		22	0.320171		13.9194	0.00287504	1	0.0415648	0.0146766	,,
translation initiation factor binding	5		75	0.533618		6.24159	0.00310934	1	0.044319	0.0156491	,,,,
chaperone binding	12		362	1.28068		2.77757	0.00333496	1	0.0468747	0.01641	,,,,,,,,,,,
mRNA 5'-UTR binding	4		47	0.426894		8.28546	0.00335236	1	0.0464738	0.01641	,,,
adenine transmembrane transporter activity	2		7	0.213447		29.9974	0.003454	1	0.0472357	0.016623	,
protein homodimerization activity	62		3308	6.61686		1.45541	0.00348892	1	0.0470771	0.016623	,,,,,,,,,,,,,,,,,,,,,,,,,,,,,,,,,,,,,,,,,,,,,,,,,,,,,,,,,,,,,
Ral GTPase binding	4		48	0.426894		8.11723	0.00361965	1	0.0481985	0.016798	,,,
protein kinase A catalytic subunit binding	4		48	0.426894		8.11723	0.00361965	1	0.0475725	0.016798	,,,
fructose binding	3		24	0.320171		12.8169	0.00370583	1	0.0480808	0.0169774	,,
ATP-dependent DNA helicase activity	6		114	0.640342		4.79018	0.00403413	1	0.0516777	0.0182475	,,,,,
protein-disulfide reductase activity	3		25	0.320171		12.3286	0.00417046	1	0.0527563	0.0183984	,,
endopeptidase activator activity	3		25	0.320171		12.3286	0.00417046	1	0.052105	0.0183984	,,
peroxiredoxin activity	3		26	0.320171		11.8762	0.00466888	1	0.0576208	0.020346	,,
calcium-dependent cysteine-type endopeptidase activity	5		84	0.533618		5.58265	0.00505274	1	0.0616069	0.0217535	,,,,
alpha-catenin binding	4		53	0.426894		7.3691	0.00517423	1	0.0623372	0.0220114	,,,
C3HC4-type RING finger domain binding	3		28	0.320171		11.0641	0.00576977	1	0.0686943	0.0239002	,,
glyceraldehyde-3-phosphate dehydrogenase (NAD+) (phosphorylating) activity	2		9	0.213447		24.1443	0.00581888	1	0.0684733	0.0239002	,
lithium ion binding	2		9	0.213447		24.1443	0.00581888	1	0.0676863	0.0239002	,
G-protein beta/gamma-subunit complex binding	4		55	0.426894		7.10709	0.00590399	1	0.0678959	0.0239742	,,,
ATPase binding	10		295	1.06724		2.89167	0.00605062	1	0.0688003	0.0242935	,,,,,,,,,
ATP-dependent RNA helicase activity	11		344	1.17396		2.70182	0.00628071	1	0.0706231	0.0247553	,,,,,,,,,,
cAMP-dependent protein kinase inhibitor activity	3		29	0.320171		10.6984	0.00637347	1	0.0708786	0.0247553	,,
phosphoglucomutase activity	3		29	0.320171		10.6984	0.00637347	1	0.0701081	0.0247553	,,
collagen binding involved in cell-matrix adhesion	3		30	0.320171		10.356	0.0070134	1	0.0763178	0.02684	,,
signal sequence binding	2		10	0.213447		21.9981	0.00721062	1	0.0776292	0.02684	,
type 2A serotonin receptor binding	2		10	0.213447		21.9981	0.00721062	1	0.0768121	0.02684	,
dATP binding	2		10	0.213447		21.9981	0.00721062	1	0.076012	0.02684	,
Rab GDP-dissociation inhibitor activity	2		11	0.213447		20.2024	0.00873676	1	0.0911506	0.0315352	,
isocitrate dehydrogenase (NADP+) activity	2		11	0.213447		20.2024	0.00873676	1	0.0902205	0.0315352	,
procollagen-lysine 5-dioxygenase activity	2		11	0.213447		20.2024	0.00873676	1	0.0893091	0.0315352	,
adenylate cyclase binding	3		33	0.320171		9.44894	0.00915546	1	0.0926533	0.0323922	,,
nitric-oxide synthase regulator activity	3		33	0.320171		9.44894	0.00915546	1	0.0917359	0.0323922	,,
dopachrome isomerase activity	2		12	0.213447		18.6777	0.0103935	1	0.10312	0.0351449	,
insulin-like growth factor-activated receptor activity	2		12	0.213447		18.6777	0.0103935	1	0.102119	0.0351449	,
nucleoside binding	2		12	0.213447		18.6777	0.0103935	1	0.101137	0.0351449	,
thioesterase binding	4		65	0.426894		6.03432	0.01058	1	0.101971	0.0351449	,,,
aminoacyl-tRNA editing activity	4		65	0.426894		6.03432	0.01058	1	0.101009	0.0351449	,,,
protein phosphatase binding	10		321	1.06724		2.65836	0.0105884	1	0.100145	0.0351449	,,,,,,,,,
SNARE binding	7		182	0.747065		3.42819	0.010622	1	0.0995318	0.0351449	,,,,,,
phosphoprotein binding	6		141	0.640342		3.88097	0.0110482	1	0.102576	0.0362197	,,,,,
enzyme regulator activity	5		102	0.533618		4.6094	0.0112622	1	0.103613	0.0365858	,,,,
5.8S rRNA binding	2		13	0.213447		17.3669	0.0121773	1	0.111022	0.039202	,
heat shock protein binding	6		145	0.640342		3.77483	0.0125509	1	0.113407	0.0400441	,,,,,
double-stranded DNA-dependent ATPase activity	1		1	0.106724		76.1473	0.0131152	1	0.117456	0.0404694
signal transducer, downstream of receptor, with protein tyrosine phosphatase activity	1		1	0.106724		76.1473	0.0131152	1	0.116426	0.0404694
2',3'-cyclic-nucleotide 3'-phosphodiesterase activity	1		1	0.106724		76.1473	0.0131152	1	0.115413	0.0404694
protein N-terminus binding	12		434	1.28068		2.3181	0.0131372	1	0.114611	0.0404694	,,,,,,,,,,,
small ribosomal subunit rRNA binding	3		39	0.320171		8.0404	0.0144741	1	0.125195	0.0442066	,,
phospholipase A2 inhibitor activity	2		15	0.213447		15.2295	0.0161113	1	0.138175	0.0483798	,
purine nucleobase binding	2		15	0.213447		15.2295	0.0161113	1	0.137014	0.0483798	,
cadherin binding	6		155	0.640342		3.53324	0.0169236	1	0.142723	0.0503957	,,,,,
transporter activity	14		561	1.49413		2.06536	0.0176052	1	0.147244	0.051992	,,,,,,,,,,,,,
Arp2/3 complex binding	2		16	0.213447		14.3466	0.0182545	1	0.151423	0.0521845	,
glycogen phosphorylase activity	2		16	0.213447		14.3466	0.0182545	1	0.150192	0.0521845	,
fructose-bisphosphate aldolase activity	2		16	0.213447		14.3466	0.0182545	1	0.148981	0.0521845	,
L-malate dehydrogenase activity	2		16	0.213447		14.3466	0.0182545	1	0.147789	0.0521845	,
glycoprotein binding	8		253	0.853789		2.77036	0.0193787	1	0.155645	0.0549585	,,,,,,,
phosphate ion binding	3		44	0.320171		7.15196	0.0199926	1	0.159311	0.055525	,,
growth factor receptor binding	2		17	0.213447		13.5605	0.0205108	1	0.162163	0.055525	,
macromolecular complex binding	2		17	0.213447		13.5605	0.0205108	1	0.160906	0.055525	,
translation release factor activity	2		17	0.213447		13.5605	0.0205108	1	0.159668	0.055525	,
phenylalanine-tRNA ligase activity	2		17	0.213447		13.5605	0.0205108	1	0.15845	0.055525	,
hydrogen-exporting ATPase activity, phosphorylative mechanism	2		17	0.213447		13.5605	0.0205108	1	0.157249	0.055525	,
magnesium ion binding	22		1040	2.34792		1.70029	0.0209857	1	0.159681	0.0561589	,,,,,,,,,,,,,,,,,,,,,
monocarboxylic acid transmembrane transporter activity	3		45	0.320171		6.99732	0.0212164	1	0.160231	0.0561589	,,
adenyl-nucleotide exchange factor activity	3		45	0.320171		6.99732	0.0212164	1	0.159044	0.0561589	,,
G-protein coupled receptor binding	7		211	0.747065		2.95979	0.0220907	1	0.164381	0.0580432	,,,,,,
acetyl-CoA C-acetyltransferase activity	2		18	0.213447		12.856	0.0228766	1	0.168986	0.0596694	,
ubiquitin-like protein conjugating enzyme binding	2		19	0.213447		12.2212	0.0253488	1	0.185891	0.0612614	,
histone methyltransferase binding	2		19	0.213447		12.2212	0.0253488	1	0.184554	0.0612614	,
protein kinase C inhibitor activity	2		19	0.213447		12.2212	0.0253488	1	0.183236	0.0612614	,
retromer complex binding	2		19	0.213447		12.2212	0.0253488	1	0.181936	0.0612614	,
peroxidase activity	4		85	0.426894		4.63506	0.0258242	1	0.184043	0.0612614	,,,
poly(U) RNA binding	4		85	0.426894		4.63506	0.0258242	1	0.182756	0.0612614	,,,
formaldehyde dehydrogenase activity	1		2	0.106724		52.7174	0.0260585	1	0.183133	0.0612614
myo-inositol:sodium symporter activity	1		2	0.106724		52.7174	0.0260585	1	0.18187	0.0612614
phosphoribosylformylglycinamidine synthase activity	1		2	0.106724		52.7174	0.0260585	1	0.180625	0.0612614
acetylcholine receptor activator activity	1		2	0.106724		52.7174	0.0260585	1	0.179396	0.0612614
S-(hydroxymethyl)glutathione dehydrogenase activity	1		2	0.106724		52.7174	0.0260585	1	0.178184	0.0612614
ATP:ADP antiporter activity	1		2	0.106724		52.7174	0.0260585	1	0.176988	0.0612614
glutamine-tRNA ligase activity	1		2	0.106724		52.7174	0.0260585	1	0.175808	0.0612614
myosin VI light chain binding	1		2	0.106724		52.7174	0.0260585	1	0.174644	0.0612614
fumarate hydratase activity	1		2	0.106724		52.7174	0.0260585	1	0.173495	0.0612614
L-lactate dehydrogenase activity	2		20	0.213447		11.6461	0.0279243	1	0.184702	0.0652185	,
ribosomal small subunit binding	4		88	0.426894		4.47926	0.0288538	1	0.189611	0.0669521	,,,
monosaccharide binding	2		21	0.213447		11.1226	0.0305997	1	0.199787	0.0700166	,
sodium:potassium-exchanging ATPase activity	3		52	0.320171		6.07749	0.0309064	1	0.200496	0.0700166	,,
dynactin binding	3		52	0.320171		6.07749	0.0309064	1	0.199219	0.0700166	,,
signal transducer, downstream of receptor, with serine/threonine kinase activity	8		277	0.853789		2.5314	0.0309583	1	0.19829	0.0700166	,,,,,,,
mRNA 3'-UTR binding	8		281	0.853789		2.49553	0.033267	1	0.211737	0.0740696	,,,,,,,
long-chain-3-hydroxyacyl-CoA dehydrogenase activity	2		22	0.213447		10.6443	0.0333722	1	0.211079	0.0740696	,
dehydroascorbic acid transporter activity	2		22	0.213447		10.6443	0.0333722	1	0.209768	0.0740696	,
neutral amino acid transmembrane transporter activity	3		54	0.320171		5.85749	0.0340339	1	0.212607	0.0749002	,,
transforming growth factor beta binding	4		93	0.426894		4.24163	0.034353	1	0.213284	0.0749002	,,,
MHC class I protein binding	4		94	0.426894		4.1971	0.0355208	1	0.219189	0.0749002	,,,
aminoacylase activity	2		23	0.213447		10.2053	0.0362387	1	0.222264	0.0749002	,
microtubule binding	16		738	1.70758		1.77686	0.036649	1	0.223426	0.0749002	,,,,,,,,,,,,,,,
kininogen binding	1		3	0.106724		40.3133	0.0388323	1	0.235319	0.0749002
pyridoxal kinase activity	1		3	0.106724		40.3133	0.0388323	1	0.233918	0.0749002
phosphoribosylaminoimidazolesuccinocarboxamide synthase activity	1		3	0.106724		40.3133	0.0388323	1	0.232534	0.0749002
procollagen glucosyltransferase activity	1		3	0.106724		40.3133	0.0388323	1	0.231166	0.0749002
purine-specific mismatch base pair DNA N-glycosylase activity	1		3	0.106724		40.3133	0.0388323	1	0.229814	0.0749002
BLOC-2 complex binding	1		3	0.106724		40.3133	0.0388323	1	0.228478	0.0749002
dinucleotide insertion or deletion binding	1		3	0.106724		40.3133	0.0388323	1	0.227158	0.0749002
fatty acid peroxidase activity	1		3	0.106724		40.3133	0.0388323	1	0.225852	0.0749002
L-threonine transmembrane transporter activity	1		3	0.106724		40.3133	0.0388323	1	0.224561	0.0749002
L-hydroxyproline transmembrane transporter activity	1		3	0.106724		40.3133	0.0388323	1	0.223286	0.0749002
K6-linked polyubiquitin binding	1		3	0.106724		40.3133	0.0388323	1	0.222024	0.0749002
acireductone synthase activity	1		3	0.106724		40.3133	0.0388323	1	0.220777	0.0749002
1,4-alpha-glucan branching enzyme activity	1		3	0.106724		40.3133	0.0388323	1	0.219543	0.0749002
adrenergic receptor binding	1		3	0.106724		40.3133	0.0388323	1	0.218324	0.0749002
mannose transmembrane transporter activity	1		3	0.106724		40.3133	0.0388323	1	0.217117	0.0749002
spermidine synthase activity	1		3	0.106724		40.3133	0.0388323	1	0.215924	0.0749002
phosphoribosylaminoimidazole carboxylase activity	1		3	0.106724		40.3133	0.0388323	1	0.214745	0.0749002
quercetin 2,3-dioxygenase activity	1		3	0.106724		40.3133	0.0388323	1	0.213577	0.0749002
protein kinase regulator activity	3		57	0.320171		5.55582	0.0390199	1	0.21345	0.0749002	,,
nitric-oxide synthase binding	3		57	0.320171		5.55582	0.0390199	1	0.212302	0.0749002	,,
phosphoserine binding	2		24	0.213447		9.80114	0.0391962	1	0.212121	0.0749002	,
aminopeptidase activity	5		142	0.533618		3.32231	0.0398269	1	0.214387	0.0757006	,,,,
collagen binding	8		292	0.853789		2.40192	0.0402115	1	0.215313	0.0760273	,,,,,,,
transferrin receptor binding	3		58	0.320171		5.46205	0.0407598	1	0.2171	0.0766583	,,
protein serine/threonine kinase activator activity	4		99	0.426894		3.98777	0.0417008	1	0.220949	0.0778077	,,,
protein kinase C binding	6		192	0.640342		2.85676	0.0419053	1	0.220876	0.0778077	,,,,,
L-glutamine transmembrane transporter activity	2		25	0.213447		9.42777	0.0422419	1	0.221496	0.0778077	,
RNA 7-methylguanosine cap binding	2		25	0.213447		9.42777	0.0422419	1	0.220355	0.0778077	,
ephrin receptor activity	2		26	0.213447		9.08179	0.045373	1	0.235474	0.0792287	,
TPR domain binding	2		26	0.213447		9.08179	0.045373	1	0.234273	0.0792287	,
antioxidant activity	4		102	0.426894		3.8719	0.045682	1	0.234671	0.0792287	,,,
Tat protein binding	3		61	0.320171		5.19881	0.0462098	1	0.236184	0.0792287	,,
beta-tubulin binding	5		149	0.533618		3.16753	0.0472676	1	0.240376	0.0792287	,,,,
calcium-transporting ATPase activity	3		62	0.320171		5.11662	0.0481024	1	0.243398	0.0792287	,,
porin activity	2		27	0.213447		8.76031	0.0485867	1	0.244626	0.0792287	,
ATP-dependent 5'-3' DNA helicase activity	2		27	0.213447		8.76031	0.0485867	1	0.243414	0.0792287	,
phosphopyruvate hydratase activity	2		27	0.213447		8.76031	0.0485867	1	0.242215	0.0792287	,
phospholipase inhibitor activity	2		27	0.213447		8.76031	0.0485867	1	0.241028	0.0792287	,
UDP-glucose 6-dehydrogenase activity	1		4	0.106724		32.6346	0.0514387	1	0.253931	0.0792287
omega-amidase activity	1		4	0.106724		32.6346	0.0514387	1	0.252699	0.0792287
glucan 1,3-alpha-glucosidase activity	1		4	0.106724		32.6346	0.0514387	1	0.251478	0.0792287
transcription factor activity, ligand-activated RNA polymerase II transcription factor binding	1		4	0.106724		32.6346	0.0514387	1	0.250269	0.0792287
dinitrosyl-iron complex binding	1		4	0.106724		32.6346	0.0514387	1	0.249071	0.0792287
adenine phosphoribosyltransferase activity	1		4	0.106724		32.6346	0.0514387	1	0.247885	0.0792287
CTPase activity	1		4	0.106724		32.6346	0.0514387	1	0.246711	0.0792287
adenine binding	1		4	0.106724		32.6346	0.0514387	1	0.245547	0.0792287
metal chelating activity	1		4	0.106724		32.6346	0.0514387	1	0.244394	0.0792287
GMP synthase activity	1		4	0.106724		32.6346	0.0514387	1	0.243252	0.0792287
protein histidine kinase activity	1		4	0.106724		32.6346	0.0514387	1	0.242121	0.0792287
GMP synthase (glutamine-hydrolyzing) activity	1		4	0.106724		32.6346	0.0514387	1	0.241	0.0792287
mevalonate transmembrane transporter activity	1		4	0.106724		32.6346	0.0514387	1	0.239889	0.0792287
15-hydroxyprostaglandin dehydrogenase (NADP+) activity	1		4	0.106724		32.6346	0.0514387	1	0.238789	0.0792287
inward rectifier potassium channel inhibitor activity	1		4	0.106724		32.6346	0.0514387	1	0.237698	0.0792287
S-nitrosoglutathione binding	1		4	0.106724		32.6346	0.0514387	1	0.236618	0.0792287
phosphate ion carrier activity	1		4	0.106724		32.6346	0.0514387	1	0.235547	0.0792287
prostaglandin-E2 9-reductase activity	1		4	0.106724		32.6346	0.0514387	1	0.234486	0.0792287
L-cysteine:2-oxoglutarate aminotransferase activity	1		4	0.106724		32.6346	0.0514387	1	0.233435	0.0792287
N6-(1,2-dicarboxyethyl)AMP AMP-lyase (fumarate-forming) activity	1		4	0.106724		32.6346	0.0514387	1	0.232393	0.0792287
neurotensin receptor activity, non-G-protein coupled	1		4	0.106724		32.6346	0.0514387	1	0.23136	0.0792287
peptidyl-cysteine S-nitrosylase activity	1		4	0.106724		32.6346	0.0514387	1	0.230336	0.0792287
aspartate binding	1		4	0.106724		32.6346	0.0514387	1	0.229321	0.0792287
(S)-2-(5-amino-1-(5-phospho-D-ribosyl)imidazole-4-carboxamido)succinate AMP-lyase (fumarate-forming) activity	1		4	0.106724		32.6346	0.0514387	1	0.228316	0.0792287
phosphoglycerate dehydrogenase activity	1		4	0.106724		32.6346	0.0514387	1	0.227319	0.0792287
fumarylacetoacetase activity	1		4	0.106724		32.6346	0.0514387	1	0.22633	0.0792287
selenocysteine-tRNA ligase activity	1		4	0.106724		32.6346	0.0514387	1	0.22535	0.0792287
Rho-dependent protein serine/threonine kinase activity	1		4	0.106724		32.6346	0.0514387	1	0.224379	0.0792287
valine-tRNA ligase activity	2		28	0.213447		8.46082	0.0518803	1	0.225334	0.0794085	,
thioredoxin-disulfide reductase activity	3		64	0.320171		4.95979	0.0519998	1	0.224888	0.0794085	,,
phosphatase activity	5		155	0.533618		3.04589	0.0542574	1	0.233653	0.0795359	,,,,
protein phosphatase 2B binding	2		29	0.213447		8.18112	0.0552512	1	0.236925	0.0795359	,
keratin filament binding	2		29	0.213447		8.18112	0.0552512	1	0.235925	0.0795359	,
1-phosphatidylinositol binding	4		109	0.426894		3.62606	0.0557646	1	0.237117	0.0795359	,,,
potassium ion binding	3		66	0.320171		4.81229	0.0560448	1	0.237311	0.0795359	,,
drug binding	9		372	0.960512		2.09112	0.0587358	1	0.247669	0.0795359	,,,,,,,,
superoxide dismutase activity	2		31	0.213447		7.67376	0.0622144	1	0.261249	0.0795359	,
syndecan binding	2		31	0.213447		7.67376	0.0622144	1	0.260169	0.0795359	,
phosphatidylinositol-4,5-bisphosphate binding	8		322	0.853789		2.179	0.0638287	1	0.265822	0.0795359	,,,,,,,
L-dopa decarboxylase activator activity	1		5	0.106724		27.413	0.0638799	1	0.264945	0.0795359
triokinase activity	1		5	0.106724		27.413	0.0638799	1	0.263863	0.0795359
protein deglycase activity	1		5	0.106724		27.413	0.0638799	1	0.262791	0.0795359
small protein activating enzyme binding	1		5	0.106724		27.413	0.0638799	1	0.261727	0.0795359
tyrosine 3-monooxygenase activator activity	1		5	0.106724		27.413	0.0638799	1	0.260671	0.0795359
mitochondrial ribosome binding	1		5	0.106724		27.413	0.0638799	1	0.259624	0.0795359
oxidized pyrimidine DNA binding	1		5	0.106724		27.413	0.0638799	1	0.258586	0.0795359
mercury ion binding	1		5	0.106724		27.413	0.0638799	1	0.257556	0.0795359
asparagine-tRNA ligase activity	1		5	0.106724		27.413	0.0638799	1	0.256534	0.0795359
sedoheptulose-7-phosphate:D-glyceraldehyde-3-phosphate glyceronetransferase activity	1		5	0.106724		27.413	0.0638799	1	0.25552	0.0795359
glutathione synthase activity	1		5	0.106724		27.413	0.0638799	1	0.254514	0.0795359
S-formylglutathione hydrolase activity	1		5	0.106724		27.413	0.0638799	1	0.253516	0.0795359
ferric iron transmembrane transporter activity	1		5	0.106724		27.413	0.0638799	1	0.252525	0.0795359
phenylpyruvate tautomerase activity	1		5	0.106724		27.413	0.0638799	1	0.251543	0.0795359
uridine phosphorylase activity	1		5	0.106724		27.413	0.0638799	1	0.250568	0.0795359
CTP binding	1		5	0.106724		27.413	0.0638799	1	0.2496	0.0795359
arsenite transmembrane transporter activity	1		5	0.106724		27.413	0.0638799	1	0.24864	0.0795359
cuprous ion binding	1		5	0.106724		27.413	0.0638799	1	0.247688	0.0795359
nicotinamide phosphoribosyltransferase activity	1		5	0.106724		27.413	0.0638799	1	0.246742	0.0795359
N-acylneuraminate-9-phosphate synthase activity	1		5	0.106724		27.413	0.0638799	1	0.245804	0.0795359
N-acetylneuraminate synthase activity	1		5	0.106724		27.413	0.0638799	1	0.244873	0.0795359
O-phospho-L-serine:2-oxoglutarate aminotransferase activity	1		5	0.106724		27.413	0.0638799	1	0.243949	0.0795359
D-dopachrome decarboxylase activity	1		5	0.106724		27.413	0.0638799	1	0.243032	0.0795359
intramolecular transferase activity	1		5	0.106724		27.413	0.0638799	1	0.242122	0.0795359
glucose-6-phosphate isomerase activity	1		5	0.106724		27.413	0.0638799	1	0.241218	0.0795359
hormone receptor binding	1		5	0.106724		27.413	0.0638799	1	0.240321	0.0795359
ribonuclease inhibitor activity	1		5	0.106724		27.413	0.0638799	1	0.239431	0.0795359
myosin I binding	1		5	0.106724		27.413	0.0638799	1	0.238548	0.0795359
thiol oxidase activity	1		5	0.106724		27.413	0.0638799	1	0.237671	0.0795359
purine-nucleoside phosphorylase activity	1		5	0.106724		27.413	0.0638799	1	0.2368	0.0795359
DNA/RNA helicase activity	1		5	0.106724		27.413	0.0638799	1	0.235936	0.0795359
nucleobase-containing compound transmembrane transporter activity	1		5	0.106724		27.413	0.0638799	1	0.235078	0.0795359
ATP citrate synthase activity	1		5	0.106724		27.413	0.0638799	1	0.234226	0.0795359
IMP cyclohydrolase activity	1		5	0.106724		27.413	0.0638799	1	0.233381	0.0795359
phosphoribosylaminoimidazolecarboxamide formyltransferase activity	1		5	0.106724		27.413	0.0638799	1	0.232541	0.0795359
methylenetetrahydrofolate dehydrogenase [NAD(P)+] activity	1		5	0.106724		27.413	0.0638799	1	0.231708	0.0795359
FAD-AMP lyase (cyclizing) activity	1		5	0.106724		27.413	0.0638799	1	0.23088	0.0795359
pyrimidine ribonucleotide binding	1		5	0.106724		27.413	0.0638799	1	0.230059	0.0795359
6-phosphogluconolactonase activity	1		5	0.106724		27.413	0.0638799	1	0.229243	0.0795359
arachidonate-CoA ligase activity	1		5	0.106724		27.413	0.0638799	1	0.228433	0.0795359
6,7-dihydropteridine reductase activity	1		5	0.106724		27.413	0.0638799	1	0.227628	0.0795359
UTP:glucose-1-phosphate uridylyltransferase activity	1		5	0.106724		27.413	0.0638799	1	0.22683	0.0795359
calcium-transporting ATPase activity involved in regulation of cardiac muscle cell membrane potential	1		5	0.106724		27.413	0.0638799	1	0.226037	0.0795359
glycerone kinase activity	1		5	0.106724		27.413	0.0638799	1	0.225249	0.0795359
platelet-derived growth factor receptor binding	3		70	0.320171		4.54212	0.0645667	1	0.22688	0.0801119	,,
voltage-gated anion channel activity	2		33	0.213447		7.22566	0.0694564	1	0.243218	0.0834795	,
nerve growth factor binding	2		33	0.213447		7.22566	0.0694564	1	0.242379	0.0834795	,
translation activator activity	2		33	0.213447		7.22566	0.0694564	1	0.241546	0.0834795	,
lipopolysaccharide binding	4		119	0.426894		3.32452	0.0720638	1	0.249755	0.0834795	,,,
histone methyltransferase activity (H4-R3 specific)	2		34	0.213447		7.02068	0.0731759	1	0.252744	0.0834795	,
mannose binding	4		120	0.426894		3.2971	0.0738136	1	0.25408	0.0834795	,,,
malate dehydrogenase (NADP+) activity	1		6	0.106724		23.6319	0.0761581	1	0.261261	0.0834795
L-iditol 2-dehydrogenase activity	1		6	0.106724		23.6319	0.0761581	1	0.260379	0.0834795
D-xylulose reductase activity	1		6	0.106724		23.6319	0.0761581	1	0.259502	0.0834795
3-oxo-behenoyl-CoA reductase activity	1		6	0.106724		23.6319	0.0761581	1	0.258631	0.0834795
3-oxo-cerotoyl-CoA reductase activity	1		6	0.106724		23.6319	0.0761581	1	0.257766	0.0834795
purine ribonucleoside triphosphate binding	1		6	0.106724		23.6319	0.0761581	1	0.256907	0.0834795
lysine-tRNA ligase activity	1		6	0.106724		23.6319	0.0761581	1	0.256053	0.0834795
spermine synthase activity	1		6	0.106724		23.6319	0.0761581	1	0.255205	0.0834795
collagen receptor activity	1		6	0.106724		23.6319	0.0761581	1	0.254363	0.0834795
myosin-light-chain-phosphatase activity	1		6	0.106724		23.6319	0.0761581	1	0.253526	0.0834795
3-oxo-lignoceroyl-CoA reductase activity	1		6	0.106724		23.6319	0.0761581	1	0.252695	0.0834795
cytosolic dipeptidase activity	1		6	0.106724		23.6319	0.0761581	1	0.251869	0.0834795
diiodophenylpyruvate reductase activity	1		6	0.106724		23.6319	0.0761581	1	0.251049	0.0834795
1-pyrroline dehydrogenase activity	1		6	0.106724		23.6319	0.0761581	1	0.250234	0.0834795
cyclic nucleotide binding	1		6	0.106724		23.6319	0.0761581	1	0.249424	0.0834795
glutamine-fructose-6-phosphate transaminase (isomerizing) activity	1		6	0.106724		23.6319	0.0761581	1	0.248619	0.0834795
translation termination factor activity	1		6	0.106724		23.6319	0.0761581	1	0.24782	0.0834795
polo kinase kinase activity	1		6	0.106724		23.6319	0.0761581	1	0.247026	0.0834795
xenobiotic transporter activity	1		6	0.106724		23.6319	0.0761581	1	0.246237	0.0834795
riboflavin reductase (NADPH) activity	1		6	0.106724		23.6319	0.0761581	1	0.245452	0.0834795
adenosylhomocysteinase activity	1		6	0.106724		23.6319	0.0761581	1	0.244673	0.0834795
sodium:potassium:chloride symporter activity	1		6	0.106724		23.6319	0.0761581	1	0.243899	0.0834795
3-oxo-arachidoyl-CoA reductase activity	1		6	0.106724		23.6319	0.0761581	1	0.243129	0.0834795
Edg-2 lysophosphatidic acid receptor binding	1		6	0.106724		23.6319	0.0761581	1	0.242365	0.0834795
adenylosuccinate synthase activity	1		6	0.106724		23.6319	0.0761581	1	0.241605	0.0834795
adenyl nucleotide binding	1		6	0.106724		23.6319	0.0761581	1	0.24085	0.0834795
phosphopentomutase activity	1		6	0.106724		23.6319	0.0761581	1	0.2401	0.0834795
strictosidine synthase activity	1		6	0.106724		23.6319	0.0761581	1	0.239354	0.0834795
inositol monophosphate phosphatase activity	1		6	0.106724		23.6319	0.0761581	1	0.238613	0.0834795
AP-3 adaptor complex binding	1		6	0.106724		23.6319	0.0761581	1	0.237877	0.0834795
Rho GDP-dissociation inhibitor binding	1		6	0.106724		23.6319	0.0761581	1	0.237145	0.0834795
dihydropyrimidinase activity	1		6	0.106724		23.6319	0.0761581	1	0.236417	0.0834795
metallodipeptidase activity	2		35	0.213447		6.827	0.0769579	1	0.238169	0.0835868	,
ErbB-2 class receptor binding	2		35	0.213447		6.827	0.0769579	1	0.237443	0.0835868	,
D-glucose transmembrane transporter activity	2		35	0.213447		6.827	0.0769579	1	0.236721	0.0835868	,
protease binding	11		516	1.17396		1.80339	0.0807276	1	0.247565	0.086967	,,,,,,,,,,
RNA-dependent ATPase activity	2		36	0.213447		6.64373	0.0808001	1	0.247038	0.086967	,
lactate transmembrane transporter activity	2		36	0.213447		6.64373	0.0808001	1	0.246294	0.086967	,
nucleoside diphosphate kinase activity	3		78	0.320171		4.08361	0.0832558	1	0.253018	0.0888572	,,
nucleotide binding	28		1612	2.98826		1.38064	0.0837691	1	0.253815	0.0888572	,,,,,,,,,,,,,,,,,,,,,,,,,,,
protein anchor	2		37	0.213447		6.47004	0.0847004	1	0.255871	0.0888572	,
tau protein binding	2		37	0.213447		6.47004	0.0847004	1	0.25511	0.0888572	,
glutathione transferase activity	4		126	0.426894		3.14164	0.0847578	1	0.254525	0.0888572	,,,
lipid binding	13		644	1.38741		1.68167	0.085367	1	0.255596	0.0888572	,,,,,,,,,,,,
peptidyl-prolyl cis-trans isomerase activity	5		178	0.533618		2.65507	0.0862645	1	0.257521	0.0888572	,,,,
SNAP receptor activity	5		179	0.533618		2.64034	0.0878402	1	0.261454	0.0888572	,,,,
bis(5'-nucleosyl)-tetraphosphatase (asymmetrical) activity	1		7	0.106724		20.7675	0.0882755	1	0.261979	0.0888572
phosphoribosylformylglycinamidine cyclo-ligase activity	1		7	0.106724		20.7675	0.0882755	1	0.261213	0.0888572
sequence-specific single stranded DNA binding	1		7	0.106724		20.7675	0.0882755	1	0.260451	0.0888572
histidine-tRNA ligase activity	1		7	0.106724		20.7675	0.0882755	1	0.259694	0.0888572
RNA ligase (ATP) activity	1		7	0.106724		20.7675	0.0882755	1	0.258941	0.0888572
omega peptidase activity	1		7	0.106724		20.7675	0.0882755	1	0.258193	0.0888572
MIT domain binding	1		7	0.106724		20.7675	0.0882755	1	0.257449	0.0888572
glyceraldehyde oxidoreductase activity	1		7	0.106724		20.7675	0.0882755	1	0.256709	0.0888572
ATPase activity, coupled to movement of substances	1		7	0.106724		20.7675	0.0882755	1	0.255974	0.0888572
phosphoribosylamine-glycine ligase activity	1		7	0.106724		20.7675	0.0882755	1	0.255242	0.0888572
leucine-tRNA ligase activity	1		7	0.106724		20.7675	0.0882755	1	0.254515	0.0888572
organic cyclic compound binding	1		7	0.106724		20.7675	0.0882755	1	0.253792	0.0888572
structural constituent of cell wall	1		7	0.106724		20.7675	0.0882755	1	0.253073	0.0888572
phosphoribosylglycinamide formyltransferase activity	1		7	0.106724		20.7675	0.0882755	1	0.252358	0.0888572
IgE binding	1		7	0.106724		20.7675	0.0882755	1	0.251647	0.0888572
disulfide oxidoreductase activity	2		38	0.213447		6.30519	0.0886565	1	0.252024	0.0889901	,
carboxypeptidase activity	3		81	0.320171		3.93467	0.0907967	1	0.257385	0.0906292	,,
GTP-dependent protein binding	3		81	0.320171		3.93467	0.0907967	1	0.256666	0.0906292	,,
eukaryotic initiation factor 4E binding	2		39	0.213447		6.14854	0.0926664	1	0.261221	0.0911389	,
pre-mRNA intronic binding	2		39	0.213447		6.14854	0.0926664	1	0.260496	0.0911389	,
adenylate kinase activity	2		39	0.213447		6.14854	0.0926664	1	0.259774	0.0911389	,
cytochrome-b5 reductase activity, acting on NAD(P)H	2		40	0.213447		5.99949	0.0967279	1	0.270411	0.0911389	,
oxidoreductase activity, acting on a sulfur group of donors, disulfide as acceptor	2		40	0.213447		5.99949	0.0967279	1	0.269666	0.0911389	,
calcium channel inhibitor activity	2		40	0.213447		5.99949	0.0967279	1	0.268925	0.0911389	,
glutathione peroxidase activity	3		84	0.320171		3.7962	0.09861	1	0.273406	0.0911389	,,
alpha-tubulin binding	3		84	0.320171		3.7962	0.09861	1	0.272659	0.0911389	,,
cofactor binding	3		84	0.320171		3.7962	0.09861	1	0.271917	0.0911389	,,
cytoskeletal protein binding	6		241	0.640342		2.27892	0.099281	1	0.273023	0.0911389	,,,,,
oxidoreductase activity, acting on the CH-NH2 group of donors, oxygen as acceptor	1		8	0.106724		18.5223	0.100234	1	0.274897	0.0911389
geranyltranstransferase activity	1		8	0.106724		18.5223	0.100234	1	0.274154	0.0911389
AP-1 adaptor complex binding	1		8	0.106724		18.5223	0.100234	1	0.273415	0.0911389
tyrosine-tRNA ligase activity	1		8	0.106724		18.5223	0.100234	1	0.27268	0.0911389
K48-linked polyubiquitin binding	1		8	0.106724		18.5223	0.100234	1	0.271949	0.0911389
methionine adenosyltransferase activity	1		8	0.106724		18.5223	0.100234	1	0.271222	0.0911389
NAD(P)H dehydrogenase (quinone) activity	1		8	0.106724		18.5223	0.100234	1	0.270498	0.0911389
procollagen galactosyltransferase activity	1		8	0.106724		18.5223	0.100234	1	0.269779	0.0911389
sphingomyelin phosphodiesterase activator activity	1		8	0.106724		18.5223	0.100234	1	0.269063	0.0911389
lactoylglutathione lyase activity	1		8	0.106724		18.5223	0.100234	1	0.268352	0.0911389
serine-tRNA ligase activity	1		8	0.106724		18.5223	0.100234	1	0.267644	0.0911389
transferrin transmembrane transporter activity	1		8	0.106724		18.5223	0.100234	1	0.266939	0.0911389
dimethylallyltranstransferase activity	1		8	0.106724		18.5223	0.100234	1	0.266239	0.0911389
triose-phosphate isomerase activity	1		8	0.106724		18.5223	0.100234	1	0.265542	0.0911389
thyrotropin-releasing hormone receptor binding	1		8	0.106724		18.5223	0.100234	1	0.264848	0.0911389
transforming growth factor beta receptor, cytoplasmic mediator activity	1		8	0.106724		18.5223	0.100234	1	0.264159	0.0911389
Fc-gamma receptor I complex binding	1		8	0.106724		18.5223	0.100234	1	0.263472	0.0911389
nitric-oxide synthase inhibitor activity	1		8	0.106724		18.5223	0.100234	1	0.26279	0.0911389
high-density lipoprotein particle receptor activity	1		8	0.106724		18.5223	0.100234	1	0.262111	0.0911389
phosphoglycerate mutase activity	1		8	0.106724		18.5223	0.100234	1	0.261435	0.0911389
betaine-aldehyde dehydrogenase activity	1		8	0.106724		18.5223	0.100234	1	0.260763	0.0911389
L-aminoadipate-semialdehyde dehydrogenase activity	1		8	0.106724		18.5223	0.100234	1	0.260095	0.0911389
glucocorticoid receptor binding	1		8	0.106724		18.5223	0.100234	1	0.259429	0.0911389
N-acylneuraminate cytidylyltransferase activity	1		8	0.106724		18.5223	0.100234	1	0.258768	0.0911389
cysteine-tRNA ligase activity	1		8	0.106724		18.5223	0.100234	1	0.258109	0.0911389
phosphoprotein phosphatase activity	5		188	0.533618		2.51477	0.102685	1	0.26375	0.0931308	,,,,
ATPase activator activity	3		86	0.320171		3.70918	0.103964	1	0.266359	0.0933214	,,
gamma-catenin binding	3		86	0.320171		3.70918	0.103964	1	0.265687	0.0933214	,,
Rac guanyl-nucleotide exchange factor activity	3		86	0.320171		3.70918	0.103964	1	0.265017	0.0933214	,,
FK506 binding	3		86	0.320171		3.70918	0.103964	1	0.264351	0.0933214	,,
kinase activity	9		420	0.960512		1.85284	0.104325	1	0.264604	0.0933214	,,,,,,,,
protein kinase A binding	3		87	0.320171		3.66715	0.106684	1	0.26991	0.0933214	,,
GDP-dissociation inhibitor activity	2		43	0.213447		5.59274	0.109202	1	0.275592	0.0933214	,
RNA stem-loop binding	2		43	0.213447		5.59274	0.109202	1	0.274907	0.0933214	,
poly(G) binding	2		43	0.213447		5.59274	0.109202	1	0.274224	0.0933214	,
lipoprotein particle binding	2		43	0.213447		5.59274	0.109202	1	0.273546	0.0933214	,
vascular endothelial growth factor receptor 2 binding	2		43	0.213447		5.59274	0.109202	1	0.27287	0.0933214	,
NF-kappaB binding	4		139	0.426894		2.85044	0.110972	1	0.276609	0.0933214	,,,
orotidine-5'-phosphate decarboxylase activity	1		9	0.106724		16.7153	0.112036	1	0.278576	0.0933214
DNA polymerase processivity factor activity	1		9	0.106724		16.7153	0.112036	1	0.277893	0.0933214
cation binding	1		9	0.106724		16.7153	0.112036	1	0.277214	0.0933214
3-oxo-pimeloyl-[acp] methyl ester reductase activity	1		9	0.106724		16.7153	0.112036	1	0.276538	0.0933214
3'(2'),5'-bisphosphate nucleotidase activity	1		9	0.106724		16.7153	0.112036	1	0.275865	0.0933214
3-oxoacyl-[acyl-carrier-protein] reductase (NADPH) activity	1		9	0.106724		16.7153	0.112036	1	0.275195	0.0933214
enoyl-[acyl-carrier-protein] reductase (NADPH, A-specific) activity	1		9	0.106724		16.7153	0.112036	1	0.274529	0.0933214
nitric oxide binding	1		9	0.106724		16.7153	0.112036	1	0.273866	0.0933214
interleukin-5 receptor binding	1		9	0.106724		16.7153	0.112036	1	0.273206	0.0933214
NADH binding	1		9	0.106724		16.7153	0.112036	1	0.272549	0.0933214
phosphoglycerate kinase activity	1		9	0.106724		16.7153	0.112036	1	0.271896	0.0933214
3-hydroxypalmitoyl-[acyl-carrier-protein] dehydratase activity	1		9	0.106724		16.7153	0.112036	1	0.271245	0.0933214
S-methyl-5-thioadenosine phosphorylase activity	1		9	0.106724		16.7153	0.112036	1	0.270598	0.0933214
fatty acid synthase activity	1		9	0.106724		16.7153	0.112036	1	0.269953	0.0933214
orotate phosphoribosyltransferase activity	1		9	0.106724		16.7153	0.112036	1	0.269312	0.0933214
kinase regulator activity	1		9	0.106724		16.7153	0.112036	1	0.268674	0.0933214
ITP diphosphatase activity	1		9	0.106724		16.7153	0.112036	1	0.268039	0.0933214
[acyl-carrier-protein] S-acetyltransferase activity	1		9	0.106724		16.7153	0.112036	1	0.267407	0.0933214
enoyl-[acyl-carrier-protein] reductase (NADPH, B-specific) activity	1		9	0.106724		16.7153	0.112036	1	0.266777	0.0933214
XTP diphosphatase activity	1		9	0.106724		16.7153	0.112036	1	0.266151	0.0933214
N-terminal myristoylation domain binding	1		9	0.106724		16.7153	0.112036	1	0.265528	0.0933214
3-hydroxyoctanoyl-[acyl-carrier-protein] dehydratase activity	1		9	0.106724		16.7153	0.112036	1	0.264908	0.0933214
nitric oxide dioxygenase activity	1		9	0.106724		16.7153	0.112036	1	0.26429	0.0933214
decanoate--CoA ligase activity	2		44	0.213447		5.46915	0.11345	1	0.267003	0.0940607	,
proton-transporting ATP synthase activity, rotational mechanism	2		44	0.213447		5.46915	0.11345	1	0.266384	0.0940607	,
aldehyde dehydrogenase (NAD) activity	3		90	0.320171		3.54659	0.115005	1	0.269411	0.0951294	,,
telomeric DNA binding	4		141	0.426894		2.81036	0.115292	1	0.269458	0.0951462	,,,
histone deacetylase binding	8		370	0.853789		1.89727	0.116494	1	0.27164	0.0959168	,,,,,,,
N6-methyladenosine-containing RNA binding	2		45	0.213447		5.35089	0.11774	1	0.273915	0.0962772	,
pre-mRNA binding	2		45	0.213447		5.35089	0.11774	1	0.273286	0.0962772	,
L-serine transmembrane transporter activity	2		45	0.213447		5.35089	0.11774	1	0.272661	0.0962772	,
extracellular matrix binding	4		144	0.426894		2.75231	0.121908	1	0.281668	0.0967109	,,,
cAMP-dependent protein kinase activity	2		46	0.213447		5.23765	0.12207	1	0.281401	0.0967109	,
peroxynitrite reductase activity	1		10	0.106724		15.2295	0.123683	1	0.284471	0.0967109
bisphosphoglycerate mutase activity	1		10	0.106724		15.2295	0.123683	1	0.283826	0.0967109
2,3-bisphosphoglycerate-dependent phosphoglycerate mutase activity	1		10	0.106724		15.2295	0.123683	1	0.283184	0.0967109
proline dipeptidase activity	1		10	0.106724		15.2295	0.123683	1	0.282545	0.0967109
[acetyl-CoA carboxylase] kinase activity	1		10	0.106724		15.2295	0.123683	1	0.281909	0.0967109
vitamin binding	1		10	0.106724		15.2295	0.123683	1	0.281275	0.0967109
deubiquitinase activator activity	1		10	0.106724		15.2295	0.123683	1	0.280645	0.0967109
cupric ion binding	1		10	0.106724		15.2295	0.123683	1	0.280017	0.0967109
[hydroxymethylglutaryl-CoA reductase (NADPH)] kinase activity	1		10	0.106724		15.2295	0.123683	1	0.279392	0.0967109
UTP binding	1		10	0.106724		15.2295	0.123683	1	0.278769	0.0967109
3-oxoacyl-[acyl-carrier-protein] synthase activity	1		10	0.106724		15.2295	0.123683	1	0.27815	0.0967109
peptide disulfide oxidoreductase activity	1		10	0.106724		15.2295	0.123683	1	0.277533	0.0967109
type 1 angiotensin receptor binding	1		10	0.106724		15.2295	0.123683	1	0.276919	0.0967109
glycine-tRNA ligase activity	1		10	0.106724		15.2295	0.123683	1	0.276308	0.0967109
glucosamine-6-phosphate deaminase activity	1		10	0.106724		15.2295	0.123683	1	0.275699	0.0967109
aspartate-tRNA ligase activity	1		10	0.106724		15.2295	0.123683	1	0.275093	0.0967109
CTP synthase activity	1		10	0.106724		15.2295	0.123683	1	0.27449	0.0967109
RNA polymerase III regulatory region DNA binding	1		10	0.106724		15.2295	0.123683	1	0.273889	0.0967109
cysteine-type endopeptidase activity	7		317	0.747065		1.97397	0.125891	1	0.278171	0.0982226	,,,,,,
metalloaminopeptidase activity	3		94	0.320171		3.39765	0.126465	1	0.278829	0.098455	,,
Hsp90 protein binding	4		147	0.426894		2.69662	0.128682	1	0.2831	0.0999632	,,,
Ran GTPase binding	3		95	0.320171		3.36235	0.129392	1	0.284044	0.100297	,,
carbamoyl-phosphate synthase (glutamine-hydrolyzing) activity	1		11	0.106724		13.9862	0.135178	1	0.296104	0.102123
phosphatidylserine decarboxylase activity	1		11	0.106724		13.9862	0.135178	1	0.295464	0.102123
Rho GDP-dissociation inhibitor activity	1		11	0.106724		13.9862	0.135178	1	0.294828	0.102123
sodium-dependent multivitamin transmembrane transporter activity	1		11	0.106724		13.9862	0.135178	1	0.294194	0.102123
aspartate carbamoyltransferase activity	1		11	0.106724		13.9862	0.135178	1	0.293562	0.102123
carbamoyl-phosphate synthase (ammonia) activity	1		11	0.106724		13.9862	0.135178	1	0.292934	0.102123
UDP-glucose:glycoprotein glucosyltransferase activity	1		11	0.106724		13.9862	0.135178	1	0.292308	0.102123
L-aspartate:2-oxoglutarate aminotransferase activity	1		11	0.106724		13.9862	0.135178	1	0.291685	0.102123
formate-tetrahydrofolate ligase activity	1		11	0.106724		13.9862	0.135178	1	0.291064	0.102123
tRNA guanylyltransferase activity	1		11	0.106724		13.9862	0.135178	1	0.290446	0.102123
mRNA cap binding	1		11	0.106724		13.9862	0.135178	1	0.289831	0.102123
dihydroorotase activity	1		11	0.106724		13.9862	0.135178	1	0.289218	0.102123
peptidase activator activity	3		98	0.320171		3.26072	0.138313	1	0.295301	0.104271	,,
high-density lipoprotein particle binding	2		50	0.213447		4.82886	0.139755	1	0.297752	0.105137	,
calcium ion binding	53		3466	5.65635		1.19143	0.141108	1	0.300002	0.105348	,,,,,,,,,,,,,,,,,,,,,,,,,,,,,,,,,,,,,,,,,,,,,,,,,,,,
cell adhesion molecule binding	7		328	0.747065		1.90802	0.142611	1	0.302563	0.105348	,,,,,,
nuclear export signal receptor activity	2		51	0.213447		4.73644	0.144259	1	0.30542	0.105348	,
syntaxin-1 binding	2		51	0.213447		4.73644	0.144259	1	0.304782	0.105348	,
U6 snRNA binding	2		51	0.213447		4.73644	0.144259	1	0.304147	0.105348	,
complement component C1q binding	2		51	0.213447		4.73644	0.144259	1	0.303515	0.105348	,
palmitoyl-[acyl-carrier-protein] hydrolase activity	1		12	0.106724		12.9307	0.146522	1	0.307635	0.105348
stretch-activated, cation-selective, calcium channel activity	1		12	0.106724		12.9307	0.146522	1	0.306998	0.105348
myristoyl-[acyl-carrier-protein] hydrolase activity	1		12	0.106724		12.9307	0.146522	1	0.306364	0.105348
oleoyl-[acyl-carrier-protein] hydrolase activity	1		12	0.106724		12.9307	0.146522	1	0.305732	0.105348
osmosensor activity	1		12	0.106724		12.9307	0.146522	1	0.305103	0.105348
L-ascorbate:sodium symporter activity	1		12	0.106724		12.9307	0.146522	1	0.304477	0.105348
biliverdin reductase activity	1		12	0.106724		12.9307	0.146522	1	0.303853	0.105348
methionine-tRNA ligase activity	1		12	0.106724		12.9307	0.146522	1	0.303231	0.105348
alanine-tRNA ligase activity	1		12	0.106724		12.9307	0.146522	1	0.302613	0.105348
L-phenylalanine:2-oxoglutarate aminotransferase activity	1		12	0.106724		12.9307	0.146522	1	0.301996	0.105348
sodium-dependent L-ascorbate transmembrane transporter activity	1		12	0.106724		12.9307	0.146522	1	0.301383	0.105348
nucleobase transmembrane transporter activity	1		12	0.106724		12.9307	0.146522	1	0.300771	0.105348
L-ascorbic acid transporter activity	1		12	0.106724		12.9307	0.146522	1	0.300162	0.105348
phosphopantetheine binding	1		12	0.106724		12.9307	0.146522	1	0.299556	0.105348
glucose-6-phosphate dehydrogenase activity	1		12	0.106724		12.9307	0.146522	1	0.298952	0.105348
interleukin-33 receptor activity	1		12	0.106724		12.9307	0.146522	1	0.298351	0.105348
GTPase inhibitor activity	2		53	0.213447		4.56182	0.153356	1	0.311639	0.109592	,
[acyl-carrier-protein] S-malonyltransferase activity	1		13	0.106724		12.0233	0.157717	1	0.31986	0.109592
methylarsonate reductase activity	1		13	0.106724		12.0233	0.157717	1	0.31922	0.109592
methylenetetrahydrofolate dehydrogenase (NAD+) activity	1		13	0.106724		12.0233	0.157717	1	0.318583	0.109592
serine-type exopeptidase activity	1		13	0.106724		12.0233	0.157717	1	0.317948	0.109592
coproporphyrinogen oxidase activity	1		13	0.106724		12.0233	0.157717	1	0.317316	0.109592
glutathione dehydrogenase (ascorbate) activity	1		13	0.106724		12.0233	0.157717	1	0.316686	0.109592
N-methyltransferase activity	1		13	0.106724		12.0233	0.157717	1	0.316059	0.109592
superoxide dismutase copper chaperone activity	1		13	0.106724		12.0233	0.157717	1	0.315435	0.109592
rRNA primary transcript binding	1		13	0.106724		12.0233	0.157717	1	0.314812	0.109592
MutLalpha complex binding	1		13	0.106724		12.0233	0.157717	1	0.314193	0.109592
oxidoreductase activity, acting on paired donors, with incorporation or reduction of molecular oxygen, reduced ascorbate as one donor, and incorporation of one atom of oxygen	1		13	0.106724		12.0233	0.157717	1	0.313576	0.109592
soluble NSF attachment protein activity	1		13	0.106724		12.0233	0.157717	1	0.312961	0.109592
proline-tRNA ligase activity	1		13	0.106724		12.0233	0.157717	1	0.312348	0.109592
lactose binding	1		13	0.106724		12.0233	0.157717	1	0.311738	0.109592
phosphoacetylglucosamine mutase activity	1		13	0.106724		12.0233	0.157717	1	0.31113	0.109592
Rho GTPase binding	2		54	0.213447		4.47926	0.157945	1	0.310974	0.109592	,
ribosomal large subunit binding	2		54	0.213447		4.47926	0.157945	1	0.31037	0.109592	,
symporter activity	5		218	0.533618		2.17068	0.160154	1	0.314101	0.11091	,,,,
ionotropic glutamate receptor binding	2		55	0.213447		4.39962	0.16256	1	0.318203	0.112358	,
transferrin receptor activity	1		14	0.106724		11.2349	0.168766	1	0.329713	0.113146
tryptophan-tRNA ligase activity	1		14	0.106724		11.2349	0.168766	1	0.329077	0.113146
fructose-6-phosphate binding	1		14	0.106724		11.2349	0.168766	1	0.328445	0.113146
lipoteichoic acid receptor activity	1		14	0.106724		11.2349	0.168766	1	0.327814	0.113146
isoleucine-tRNA ligase activity	1		14	0.106724		11.2349	0.168766	1	0.327186	0.113146
phosphorylase activity	1		14	0.106724		11.2349	0.168766	1	0.326561	0.113146
catalase activity	1		14	0.106724		11.2349	0.168766	1	0.325937	0.113146
glutamate-tRNA ligase activity	1		14	0.106724		11.2349	0.168766	1	0.325317	0.113146
IMP dehydrogenase activity	1		14	0.106724		11.2349	0.168766	1	0.324698	0.113146
endoribonuclease inhibitor activity	1		14	0.106724		11.2349	0.168766	1	0.324082	0.113146
nerve growth factor receptor activity	1		14	0.106724		11.2349	0.168766	1	0.323468	0.113146
arginine-tRNA ligase activity	1		14	0.106724		11.2349	0.168766	1	0.322857	0.113146
laminin receptor activity	1		14	0.106724		11.2349	0.168766	1	0.322248	0.113146
prostaglandin-E synthase activity	1		14	0.106724		11.2349	0.168766	1	0.321641	0.113146
D5 dopamine receptor binding	1		14	0.106724		11.2349	0.168766	1	0.321036	0.113146
dITP diphosphatase activity	1		14	0.106724		11.2349	0.168766	1	0.320434	0.113146
virion binding	2		57	0.213447		4.24856	0.17186	1	0.325697	0.114789	,
phospholipase binding	2		57	0.213447		4.24856	0.17186	1	0.325088	0.114789	,
metalloexopeptidase activity	2		58	0.213447		4.17686	0.176542	1	0.333321	0.117159	,
copper ion binding	6		288	0.640342		1.90862	0.179527	1	0.338326	0.117159	,,,,,
pyruvate kinase activity	1		15	0.106724		10.5435	0.17967	1	0.337966	0.117159
threonine-tRNA ligase activity	1		15	0.106724		10.5435	0.17967	1	0.337339	0.117159
interleukin-8 receptor binding	1		15	0.106724		10.5435	0.17967	1	0.336715	0.117159
small conductance calcium-activated potassium channel activity	1		15	0.106724		10.5435	0.17967	1	0.336092	0.117159
asparagine synthase (glutamine-hydrolyzing) activity	1		15	0.106724		10.5435	0.17967	1	0.335472	0.117159
transketolase activity	1		15	0.106724		10.5435	0.17967	1	0.334854	0.117159
gap junction hemi-channel activity	1		15	0.106724		10.5435	0.17967	1	0.334239	0.117159
Toll-like receptor binding	1		15	0.106724		10.5435	0.17967	1	0.333626	0.117159
hexokinase activity	1		15	0.106724		10.5435	0.17967	1	0.333015	0.117159
Pyrin domain binding	1		15	0.106724		10.5435	0.17967	1	0.332406	0.117159
binding, bridging	1		15	0.106724		10.5435	0.17967	1	0.331799	0.117159
sodium ion binding	2		60	0.213447		4.04047	0.185964	1	0.342797	0.121042	,
peptide binding	5		231	0.533618		2.04918	0.188371	1	0.346603	0.121083	,,,,
protein C-terminus binding	13		748	1.38741		1.44825	0.188419	1	0.346061	0.121083	,,,,,,,,,,,,
calmodulin binding	9		485	0.960512		1.60516	0.190271	1	0.34883	0.121083	,,,,,,,,
myosin phosphatase activity	1		16	0.106724		9.93226	0.190431	1	0.348492	0.121083
nicotinate-nucleotide diphosphorylase (carboxylating) activity	1		16	0.106724		9.93226	0.190431	1	0.347863	0.121083
proteinase activated receptor binding	1		16	0.106724		9.93226	0.190431	1	0.347236	0.121083
NEDD8-specific protease activity	1		16	0.106724		9.93226	0.190431	1	0.346612	0.121083
apolipoprotein A-I binding	1		16	0.106724		9.93226	0.190431	1	0.345989	0.121083
plus-end directed microfilament motor activity	1		16	0.106724		9.93226	0.190431	1	0.345369	0.121083
WD40-repeat domain binding	1		16	0.106724		9.93226	0.190431	1	0.344752	0.121083
phosphogluconate dehydrogenase (decarboxylating) activity	1		16	0.106724		9.93226	0.190431	1	0.344136	0.121083
Rap guanyl-nucleotide exchange factor activity	1		16	0.106724		9.93226	0.190431	1	0.343522	0.121083
oxidoreductase activity, acting on peroxide as acceptor	1		16	0.106724		9.93226	0.190431	1	0.342911	0.121083
ATP-dependent microtubule motor activity, plus-end-directed	3		115	0.320171		2.78388	0.192298	1	0.345659	0.122053	,,
semaphorin receptor activity	2		62	0.213447		3.91271	0.195455	1	0.350709	0.12344	,
fibronectin binding	3		116	0.320171		2.76014	0.195626	1	0.350396	0.12344	,,
phosphatidylserine binding	4		174	0.426894		2.28116	0.195866	1	0.350205	0.12344	,,,
protein complex scaffold	4		174	0.426894		2.28116	0.195866	1	0.349587	0.12344	,,,
phospholipase C activity	2		63	0.213447		3.85181	0.200223	1	0.356735	0.125269	,
dynein heavy chain binding	1		17	0.106724		9.38803	0.201051	1	0.357581	0.125269
ribonucleoside-diphosphate reductase activity, thioredoxin disulfide as acceptor	1		17	0.106724		9.38803	0.201051	1	0.356954	0.125269
alkylglycerophosphoethanolamine phosphodiesterase activity	1		17	0.106724		9.38803	0.201051	1	0.356329	0.125269
L27 domain binding	1		17	0.106724		9.38803	0.201051	1	0.355706	0.125269
G-protein coupled serotonin receptor binding	1		17	0.106724		9.38803	0.201051	1	0.355085	0.125269
ribonucleoprotein complex binding	4		176	0.426894		2.25542	0.201221	1	0.354766	0.125269	,,,
PDZ domain binding	6		300	0.640342		1.83259	0.203289	1	0.357789	0.126336	,,,,,
tau-protein kinase activity	2		64	0.213447		3.79278	0.205004	1	0.360181	0.127181	,
cAMP binding	3		120	0.320171		2.66908	0.209074	1	0.366695	0.128991	,,
transferase activity, transferring glycosyl groups	2		65	0.213447		3.73553	0.209798	1	0.367327	0.128991	,
BAT3 complex binding	1		18	0.106724		8.90034	0.211532	1	0.369724	0.128991
type 1 fibroblast growth factor receptor binding	1		18	0.106724		8.90034	0.211532	1	0.369087	0.128991
leak channel activity	1		18	0.106724		8.90034	0.211532	1	0.368451	0.128991
long-chain-enoyl-CoA hydratase activity	1		18	0.106724		8.90034	0.211532	1	0.367818	0.128991
stem cell factor receptor binding	1		18	0.106724		8.90034	0.211532	1	0.367187	0.128991
translation release factor activity, codon specific	1		18	0.106724		8.90034	0.211532	1	0.366559	0.128991
C-rich single-stranded DNA binding	1		18	0.106724		8.90034	0.211532	1	0.365932	0.128991
extracellular matrix protein binding	1		18	0.106724		8.90034	0.211532	1	0.365307	0.128991
fatty acid binding	2		66	0.213447		3.67998	0.214602	1	0.369979	0.130418	,
glucose transmembrane transporter activity	2		66	0.213447		3.67998	0.214602	1	0.36935	0.130418	,
actin monomer binding	3		122	0.320171		2.62577	0.215874	1	0.370907	0.130968	,,
NADPH binding	2		67	0.213447		3.62606	0.219417	1	0.376356	0.132892	,
methylenetetrahydrofolate dehydrogenase (NADP+) activity	1		19	0.106724		8.46082	0.221875	1	0.379929	0.133476
protein-arginine omega-N symmetric methyltransferase activity	1		19	0.106724		8.46082	0.221875	1	0.379287	0.133476
protein-L-isoaspartate (D-aspartate) O-methyltransferase activity	1		19	0.106724		8.46082	0.221875	1	0.378647	0.133476
methenyltetrahydrofolate cyclohydrolase activity	1		19	0.106724		8.46082	0.221875	1	0.37801	0.133476
NADP binding	4		184	0.426894		2.15802	0.223057	1	0.379384	0.133737	,,,
protein phosphatase regulator activity	4		184	0.426894		2.15802	0.223057	1	0.378748	0.133737	,,,
long-chain fatty acid-CoA ligase activity	2		68	0.213447		3.5737	0.224241	1	0.38012	0.134221	,
receptor binding	24		1544	2.56137		1.24428	0.22615	1	0.382716	0.135138	,,,,,,,,,,,,,,,,,,,,,,,
procollagen-proline 4-dioxygenase activity	1		20	0.106724		8.06266	0.232083	1	0.392101	0.137078
(R)-2-hydroxyglutarate dehydrogenase activity	1		20	0.106724		8.06266	0.232083	1	0.391447	0.137078
patched binding	1		20	0.106724		8.06266	0.232083	1	0.390796	0.137078
interleukin-6 receptor binding	1		20	0.106724		8.06266	0.232083	1	0.390147	0.137078
leptin receptor binding	1		20	0.106724		8.06266	0.232083	1	0.3895	0.137078
creatine kinase activity	1		20	0.106724		8.06266	0.232083	1	0.388855	0.137078
pre-mRNA 3'-splice site binding	1		20	0.106724		8.06266	0.232083	1	0.388212	0.137078
protein kinase A regulatory subunit binding	2		71	0.213447		3.42531	0.238755	1	0.398713	0.140703	,
telomerase activity	1		21	0.106724		7.70029	0.242157	1	0.403729	0.140703
L-cystine transmembrane transporter activity	1		21	0.106724		7.70029	0.242157	1	0.403065	0.140703
dolichyl-diphosphooligosaccharide-protein glycotransferase activity	1		21	0.106724		7.70029	0.242157	1	0.402403	0.140703
1-phosphatidylinositol 4-kinase activity	1		21	0.106724		7.70029	0.242157	1	0.401743	0.140703
very-low-density lipoprotein particle receptor binding	1		21	0.106724		7.70029	0.242157	1	0.401086	0.140703
inositol monophosphate 4-phosphatase activity	1		21	0.106724		7.70029	0.242157	1	0.40043	0.140703
inositol monophosphate 3-phosphatase activity	1		21	0.106724		7.70029	0.242157	1	0.399777	0.140703
inositol monophosphate 1-phosphatase activity	1		21	0.106724		7.70029	0.242157	1	0.399126	0.140703
exoribonuclease activity	1		21	0.106724		7.70029	0.242157	1	0.398477	0.140703
nuclease activity	2		73	0.213447		3.33305	0.248457	1	0.40818	0.143448	,
protein disulfide oxidoreductase activity	3		132	0.320171		2.42871	0.250489	1	0.41085	0.143448	,,
MHC class II receptor activity	5		258	0.533618		1.83576	0.251825	1	0.412373	0.143448	,,,,
aminobutyraldehyde dehydrogenase activity	1		22	0.106724		7.3691	0.2521	1	0.412156	0.143448
4-trimethylammoniobutyraldehyde dehydrogenase activity	1		22	0.106724		7.3691	0.2521	1	0.411492	0.143448
clathrin light chain binding	1		22	0.106724		7.3691	0.2521	1	0.410829	0.143448
growth hormone receptor binding	1		22	0.106724		7.3691	0.2521	1	0.410168	0.143448
signal recognition particle binding	1		22	0.106724		7.3691	0.2521	1	0.40951	0.143448
supercoiled DNA binding	1		22	0.106724		7.3691	0.2521	1	0.408854	0.143448
galactose binding	1		22	0.106724		7.3691	0.2521	1	0.4082	0.143448
nucleoside-triphosphate diphosphatase activity	1		22	0.106724		7.3691	0.2521	1	0.407548	0.143448
oxidized purine DNA binding	1		22	0.106724		7.3691	0.2521	1	0.406898	0.143448
single-stranded telomeric DNA binding	1		22	0.106724		7.3691	0.2521	1	0.40625	0.143448
insulin receptor binding	3		133	0.320171		2.41062	0.253997	1	0.408657	0.144298	,,
malic enzyme activity	1		23	0.106724		7.06522	0.261911	1	0.420721	0.147321
fructokinase activity	1		23	0.106724		7.06522	0.261911	1	0.420054	0.147321
methylselenol reductase activity	1		23	0.106724		7.06522	0.261911	1	0.41939	0.147321
methylseleninic acid reductase activity	1		23	0.106724		7.06522	0.261911	1	0.418727	0.147321
mannokinase activity	1		23	0.106724		7.06522	0.261911	1	0.418067	0.147321
apolipoprotein A-I receptor binding	1		23	0.106724		7.06522	0.261911	1	0.417408	0.147321
protein-arginine N-methyltransferase activity	2		76	0.213447		3.20361	0.26303	1	0.418532	0.147321	,
tropomyosin binding	2		76	0.213447		3.20361	0.26303	1	0.417875	0.147321	,
insulin-like growth factor receptor binding	2		76	0.213447		3.20361	0.26303	1	0.41722	0.147321	,
electron carrier activity	8		465	0.853789		1.5107	0.268439	1	0.425133	0.149771	,,,,,,,
pyridoxal phosphate binding	5		266	0.533618		1.78081	0.271584	1	0.429442	0.149771	,,,,
phosphatidylcholine-sterol O-acyltransferase activator activity	1		24	0.106724		6.78541	0.271595	1	0.428789	0.149771
glycolipid binding	1		24	0.106724		6.78541	0.271595	1	0.428121	0.149771
insulin binding	1		24	0.106724		6.78541	0.271595	1	0.427455	0.149771
NADH pyrophosphatase activity	1		24	0.106724		6.78541	0.271595	1	0.426792	0.149771
LIM domain binding	1		24	0.106724		6.78541	0.271595	1	0.42613	0.149771
aldehyde dehydrogenase [NAD(P)+] activity	1		24	0.106724		6.78541	0.271595	1	0.42547	0.149771
structural constituent of epidermis	1		24	0.106724		6.78541	0.271595	1	0.424813	0.149771
RNA strand annealing activity	1		24	0.106724		6.78541	0.271595	1	0.424157	0.149771
SH2 domain binding	3		139	0.320171		2.3075	0.275179	1	0.429092	0.151513	,,
coreceptor activity	4		203	0.426894		1.95728	0.277027	1	0.43131	0.152146	,,,
single-stranded DNA binding	7		402	0.747065		1.55788	0.277555	1	0.431467	0.152146	,,,,,,
structural constituent of eye lens	2		79	0.213447		3.08385	0.277605	1	0.430885	0.152146	,
androgen receptor binding	5		269	0.533618		1.76104	0.279078	1	0.432507	0.152719	,,,,
insulin-like growth factor binding	1		25	0.106724		6.52692	0.281151	1	0.435053	0.15315
clathrin adaptor activity	1		25	0.106724		6.52692	0.281151	1	0.434389	0.15315
DNA ligase (ATP) activity	1		25	0.106724		6.52692	0.281151	1	0.433727	0.15315
endopeptidase activity	5		270	0.533618		1.75455	0.281585	1	0.433736	0.153153	,,,,
lipid transporter activity	2		80	0.213447		3.04589	0.282461	1	0.434423	0.153396	,
L-proline transmembrane transporter activity	1		26	0.106724		6.2874	0.290582	1	0.446236	0.155911
AMP-activated protein kinase activity	1		26	0.106724		6.2874	0.290582	1	0.445559	0.155911
thyroid hormone binding	1		26	0.106724		6.2874	0.290582	1	0.444885	0.155911
BMP receptor binding	1		26	0.106724		6.2874	0.290582	1	0.444213	0.155911
protein tyrosine kinase inhibitor activity	1		26	0.106724		6.2874	0.290582	1	0.443543	0.155911
nucleoside-triphosphatase activity	1		26	0.106724		6.2874	0.290582	1	0.442875	0.155911
D1 dopamine receptor binding	1		26	0.106724		6.2874	0.290582	1	0.442209	0.155911
U2 snRNA binding	1		26	0.106724		6.2874	0.290582	1	0.441545	0.155911
proteasome binding	2		83	0.213447		2.93743	0.297006	1	0.450629	0.157592	,
amino acid binding	2		83	0.213447		2.93743	0.297006	1	0.449955	0.157592	,
RNA polymerase binding	2		83	0.213447		2.93743	0.297006	1	0.449282	0.157592	,
myosin II binding	1		27	0.106724		6.06483	0.29989	1	0.452968	0.157592
cell adhesive protein binding involved in bundle of His cell-Purkinje myocyte communication	1		27	0.106724		6.06483	0.29989	1	0.452293	0.157592
calcium-dependent phospholipase A2 activity	1		27	0.106724		6.06483	0.29989	1	0.45162	0.157592
protein methyltransferase activity	1		27	0.106724		6.06483	0.29989	1	0.450949	0.157592
mitogen-activated protein kinase p38 binding	1		27	0.106724		6.06483	0.29989	1	0.45028	0.157592
5'-deoxyribose-5-phosphate lyase activity	1		27	0.106724		6.06483	0.29989	1	0.449612	0.157592
carbonyl reductase (NADPH) activity	1		27	0.106724		6.06483	0.29989	1	0.448947	0.157592
glucokinase activity	1		27	0.106724		6.06483	0.29989	1	0.448284	0.157592
protein phosphatase activator activity	1		27	0.106724		6.06483	0.29989	1	0.447623	0.157592
type II transforming growth factor beta receptor binding	1		27	0.106724		6.06483	0.29989	1	0.446964	0.157592
AMP deaminase activity	1		27	0.106724		6.06483	0.29989	1	0.446306	0.157592
protein tyrosine kinase activator activity	2		84	0.213447		2.90298	0.301844	1	0.448556	0.158386	,
nuclear hormone receptor binding	3		147	0.320171		2.18298	0.303668	1	0.450604	0.159109	,,
microtubule motor activity	7		415	0.747065		1.50923	0.304159	1	0.450672	0.159133	,,,,,,
phosphatidylcholine binding	2		86	0.213447		2.83643	0.311504	1	0.46088	0.162738	,
scaffold protein binding	5		282	0.533618		1.68022	0.311977	1	0.460906	0.162747	,,,,
telomerase RNA binding	2		87	0.213447		2.80429	0.316323	1	0.466646	0.164521	,
phosphatidylinositol-3,4,5-trisphosphate binding	4		217	0.426894		1.83172	0.318022	1	0.468469	0.164521	,,,
L-alanine transmembrane transporter activity	1		29	0.106724		5.66385	0.31814	1	0.467962	0.164521
ubiquitin activating enzyme activity	1		29	0.106724		5.66385	0.31814	1	0.467283	0.164521
calcium:sodium antiporter activity	1		29	0.106724		5.66385	0.31814	1	0.466606	0.164521
ATP-dependent protein binding	1		29	0.106724		5.66385	0.31814	1	0.465931	0.164521
ubiquitin-specific protease binding	2		88	0.213447		2.77287	0.321135	1	0.469636	0.16559	,
titin binding	2		88	0.213447		2.77287	0.321135	1	0.468959	0.16559	,
interleukin-1 receptor activity	1		30	0.106724		5.48261	0.327087	1	0.476962	0.167932
lipopolysaccharide receptor activity	1		30	0.106724		5.48261	0.327087	1	0.476276	0.167932
epoxide hydrolase activity	1		30	0.106724		5.48261	0.327087	1	0.475592	0.167932
cholesterol binding	4		222	0.426894		1.7907	0.332794	1	0.483196	0.170264	,,,
non-membrane spanning protein tyrosine kinase activity	4		222	0.426894		1.7907	0.332794	1	0.482504	0.170264	,,,
guanylate kinase activity	2		91	0.213447		2.6827	0.335516	1	0.485754	0.170264	,
alcohol dehydrogenase (NAD) activity	1		31	0.106724		5.31261	0.335916	1	0.485638	0.170264
estradiol 17-beta-dehydrogenase activity	1		31	0.106724		5.31261	0.335916	1	0.484946	0.170264
deoxyribonuclease activity	1		31	0.106724		5.31261	0.335916	1	0.484255	0.170264
m7G(5')pppN diphosphatase activity	1		31	0.106724		5.31261	0.335916	1	0.483566	0.170264
methylumbelliferyl-acetate deacetylase activity	1		31	0.106724		5.31261	0.335916	1	0.482879	0.170264
7S RNA binding	1		31	0.106724		5.31261	0.335916	1	0.482194	0.170264
small GTPase binding	2		92	0.213447		2.65393	0.34029	1	0.487781	0.172208	,
estrogen receptor binding	3		158	0.320171		2.03219	0.343	1	0.49097	0.172208	,,
structural molecule activity conferring elasticity	1		32	0.106724		5.15283	0.344629	1	0.492606	0.172208
insulin-like growth factor I binding	1		32	0.106724		5.15283	0.344629	1	0.491911	0.172208
T cell receptor binding	1		32	0.106724		5.15283	0.344629	1	0.491218	0.172208
activin binding	1		32	0.106724		5.15283	0.344629	1	0.490527	0.172208
BH3 domain binding	1		32	0.106724		5.15283	0.344629	1	0.489838	0.172208
enoyl-CoA hydratase activity	1		32	0.106724		5.15283	0.344629	1	0.489151	0.172208
arylesterase activity	1		32	0.106724		5.15283	0.344629	1	0.488466	0.172208
annealing helicase activity	1		32	0.106724		5.15283	0.344629	1	0.487783	0.172208
ephrin receptor binding	2		93	0.213447		2.62577	0.345053	1	0.487701	0.172208	,
phosphatidylinositol binding	6		365	0.640342		1.50735	0.346378	1	0.48889	0.172628	,,,,,
SH3/SH2 adaptor activity	5		296	0.533618		1.60108	0.347932	1	0.4904	0.173161	,,,,
arachidonic acid binding	1		33	0.106724		5.00238	0.353228	1	0.497173	0.175066
clathrin heavy chain binding	1		33	0.106724		5.00238	0.353228	1	0.496482	0.175066
thrombospondin receptor activity	1		33	0.106724		5.00238	0.353228	1	0.495793	0.175066
low-density lipoprotein particle binding	2		95	0.213447		2.57121	0.354545	1	0.496953	0.175232	,
glycosaminoglycan binding	2		95	0.213447		2.57121	0.354545	1	0.496265	0.175232	,
GABA receptor binding	1		34	0.106724		4.86047	0.361715	1	0.505601	0.177548
delta-catenin binding	1		34	0.106724		4.86047	0.361715	1	0.504904	0.177548
ubiquitin-like protein ligase binding	1		34	0.106724		4.86047	0.361715	1	0.504208	0.177548
histone serine kinase activity	1		34	0.106724		4.86047	0.361715	1	0.503515	0.177548
transforming growth factor beta-activated receptor activity	1		34	0.106724		4.86047	0.361715	1	0.502823	0.177548
syntaxin binding	5		303	0.533618		1.56424	0.36601	1	0.508096	0.17941	,,,,
ligand-gated ion channel activity	3		165	0.320171		1.94662	0.367954	1	0.510096	0.179929	,,
cytokine binding	2		98	0.213447		2.49349	0.368689	1	0.510415	0.179929	,
sodium channel inhibitor activity	1		35	0.106724		4.72639	0.37009	1	0.511654	0.179929
type I transforming growth factor beta receptor binding	1		35	0.106724		4.72639	0.37009	1	0.510956	0.179929
arginine binding	1		35	0.106724		4.72639	0.37009	1	0.51026	0.179929
JUN kinase binding	1		35	0.106724		4.72639	0.37009	1	0.509566	0.179929
neurotrophin TRKA receptor binding	1		36	0.106724		4.5995	0.378355	1	0.520239	0.183697
polyubiquitin binding	3		169	0.320171		1.90089	0.382142	1	0.524733	0.185284	,,
fatty-acyl-CoA binding	3		170	0.320171		1.88979	0.385679	1	0.528871	0.186392	,,
carboxylic acid binding	1		37	0.106724		4.47926	0.386512	1	0.529297	0.186392
insulin receptor substrate binding	1		37	0.106724		4.47926	0.386512	1	0.528582	0.186392
kinase activator activity	1		37	0.106724		4.47926	0.386512	1	0.527869	0.186392
gamma-tubulin binding	2		102	0.213447		2.39689	0.387353	1	0.528304	0.186545	,
3-chloroallyl aldehyde dehydrogenase activity	1		38	0.106724		4.36513	0.394563	1	0.537412	0.187411
pyrophosphatase activity	1		38	0.106724		4.36513	0.394563	1	0.53669	0.187411
protein tyrosine kinase binding	1		38	0.106724		4.36513	0.394563	1	0.53597	0.187411
inositol-1,4,5-trisphosphate 3-kinase activity	1		38	0.106724		4.36513	0.394563	1	0.535251	0.187411
complement binding	1		38	0.106724		4.36513	0.394563	1	0.534535	0.187411
RNA polymerase II carboxy-terminal domain kinase activity	1		38	0.106724		4.36513	0.394563	1	0.53382	0.187411
G-quadruplex RNA binding	1		38	0.106724		4.36513	0.394563	1	0.533107	0.187411
protein-glutamine gamma-glutamyltransferase activity	1		38	0.106724		4.36513	0.394563	1	0.532397	0.187411
non-membrane spanning protein tyrosine phosphatase activity	1		38	0.106724		4.36513	0.394563	1	0.531688	0.187411
G-rich strand telomeric DNA binding	1		38	0.106724		4.36513	0.394563	1	0.530981	0.187411
chloride channel activity	4		243	0.426894		1.63674	0.394921	1	0.530757	0.187411	,,,
cysteine-type endopeptidase activator activity involved in apoptotic process	2		105	0.213447		2.32921	0.40119	1	0.538468	0.189502	,
long-chain fatty acyl-CoA binding	1		39	0.106724		4.25668	0.402507	1	0.53952	0.189502
retinal dehydrogenase activity	1		39	0.106724		4.25668	0.402507	1	0.538806	0.189502
RAGE receptor binding	1		39	0.106724		4.25668	0.402507	1	0.538094	0.189502
U4 snRNA binding	1		39	0.106724		4.25668	0.402507	1	0.537384	0.189502
CXCR chemokine receptor binding	1		39	0.106724		4.25668	0.402507	1	0.536676	0.189502
cysteine-type peptidase activity	3		177	0.320171		1.81557	0.410285	1	0.546327	0.191678	,,
L-ascorbic acid binding	2		107	0.213447		2.28618	0.410333	1	0.545672	0.191678	,
bile acid binding	1		40	0.106724		4.15349	0.410348	1	0.544976	0.191678
steroid hormone binding	1		40	0.106724		4.15349	0.410348	1	0.544262	0.191678
cytokine receptor binding	1		40	0.106724		4.15349	0.410348	1	0.54355	0.191678
histone-arginine N-methyltransferase activity	1		40	0.106724		4.15349	0.410348	1	0.542839	0.191678
alditol:NADP+ 1-oxidoreductase activity	1		41	0.106724		4.05518	0.418085	1	0.552353	0.194366
hormone binding	1		41	0.106724		4.05518	0.418085	1	0.551633	0.194366
protein kinase B binding	1		41	0.106724		4.05518	0.418085	1	0.550915	0.194366
ubiquitin binding	6		396	0.640342		1.38973	0.418279	1	0.550453	0.194366	,,,,,
hydrolase activity, acting on ester bonds	1		42	0.106724		3.96142	0.425722	1	0.55952	0.197056
sodium:bicarbonate symporter activity	1		42	0.106724		3.96142	0.425722	1	0.558794	0.197056
protein-arginine omega-N asymmetric methyltransferase activity	1		42	0.106724		3.96142	0.425722	1	0.558071	0.197056
endonuclease activity	3		182	0.320171		1.76604	0.427674	1	0.559904	0.197703	,,
transmembrane receptor protein tyrosine kinase activity	3		183	0.320171		1.75645	0.43113	1	0.5637	0.199044	,,
RNA cap binding	1		43	0.106724		3.8719	0.433258	1	0.565751	0.199254
ion channel inhibitor activity	1		43	0.106724		3.8719	0.433258	1	0.565022	0.199254
phosphatidylcholine 1-acylhydrolase activity	1		43	0.106724		3.8719	0.433258	1	0.564295	0.199254
amino acid transmembrane transporter activity	3		184	0.320171		1.74697	0.434579	1	0.565288	0.199604	,,
protein serine/threonine phosphatase activity	4		260	0.426894		1.53023	0.444564	1	0.577534	0.203929	,,,
Rab GTPase binding	9		631	0.960512		1.2345	0.446287	1	0.579029	0.204456	,,,,,,,,
motor activity	4		261	0.426894		1.5244	0.44745	1	0.579794	0.204726	,,,
ErbB-3 class receptor binding	1		45	0.106724		3.70447	0.448035	1	0.57981	0.204732
protein dimerization activity	4		262	0.426894		1.51861	0.45033	1	0.582036	0.205518	,,,
NAD+ ADP-ribosyltransferase activity	2		117	0.213447		2.09284	0.454955	1	0.587263	0.206984	,
ubiquitin-like protein transferase activity	1		46	0.106724		3.62606	0.455279	1	0.586933	0.206984
I-SMAD binding	1		46	0.106724		3.62606	0.455279	1	0.586186	0.206984
3-hydroxyacyl-CoA dehydrogenase activity	1		47	0.106724		3.55091	0.462428	1	0.594634	0.209966
Hsp70 protein binding	2		119	0.213447		2.05804	0.463646	1	0.595444	0.210253	,
receptor tyrosine kinase binding	3		193	0.320171		1.66603	0.465245	1	0.59674	0.21071	,,
DNA helicase activity	2		120	0.213447		2.04106	0.467961	1	0.599464	0.211404	,
methyl-CpG binding	2		120	0.213447		2.04106	0.467961	1	0.598706	0.211404	,
epidermal growth factor receptor binding	2		121	0.213447		2.02437	0.472255	1	0.603437	0.212806	,
phospholipase A2 activity	2		121	0.213447		2.02437	0.472255	1	0.602676	0.212806	,
proteoglycan binding	1		49	0.106724		3.40958	0.476445	1	0.607258	0.213386
channel activity	1		49	0.106724		3.40958	0.476445	1	0.606494	0.213386
protein serine/threonine kinase inhibitor activity	1		49	0.106724		3.40958	0.476445	1	0.605732	0.213386
palmitoyl-CoA hydrolase activity	1		49	0.106724		3.40958	0.476445	1	0.604972	0.213386
hyaluronic acid binding	2		122	0.213447		2.00794	0.476528	1	0.604319	0.213386	,
clathrin binding	3		198	0.320171		1.62422	0.481962	1	0.610445	0.215078	,,
ATP-dependent helicase activity	1		50	0.106724		3.34305	0.483316	1	0.611395	0.215078
calcium-release channel activity	1		50	0.106724		3.34305	0.483316	1	0.610632	0.215078
SUMO binding	1		50	0.106724		3.34305	0.483316	1	0.609871	0.215078
dystroglycan binding	1		50	0.106724		3.34305	0.483316	1	0.609111	0.215078
protein kinase activity	13		956	1.38741		1.13356	0.486138	1	0.611905	0.215679	,,,,,,,,,,,,
ferric iron binding	1		51	0.106724		3.27907	0.490097	1	0.616123	0.215679
sulfate transmembrane transporter activity	1		51	0.106724		3.27907	0.490097	1	0.615358	0.215679
mRNA 3'-UTR AU-rich region binding	1		51	0.106724		3.27907	0.490097	1	0.614596	0.215679
signaling adaptor activity	1		51	0.106724		3.27907	0.490097	1	0.613835	0.215679
phosphatase regulator activity	1		51	0.106724		3.27907	0.490097	1	0.613076	0.215679
secondary active sulfate transmembrane transporter activity	1		51	0.106724		3.27907	0.490097	1	0.612319	0.215679
oxalate transmembrane transporter activity	1		51	0.106724		3.27907	0.490097	1	0.611564	0.215679
very long-chain fatty acid-CoA ligase activity	1		51	0.106724		3.27907	0.490097	1	0.610811	0.215679
AT DNA binding	1		52	0.106724		3.21749	0.49679	1	0.61839	0.218087
hydrolase activity, hydrolyzing O-glycosyl compounds	1		52	0.106724		3.21749	0.49679	1	0.61763	0.218087
voltage-gated ion channel activity	2		128	0.213447		1.91473	0.501716	1	0.622989	0.219905	,
DNA-(apurinic or apyrimidinic site) lyase activity	1		53	0.106724		3.15818	0.503394	1	0.624308	0.219905
serine-type carboxypeptidase activity	1		53	0.106724		3.15818	0.503394	1	0.623543	0.219905
oxidoreductase activity, acting on NAD(P)H, quinone or similar compound as acceptor	1		53	0.106724		3.15818	0.503394	1	0.622781	0.219905
ARF guanyl-nucleotide exchange factor activity	2		129	0.213447		1.90003	0.505837	1	0.625039	0.220703	,
dipeptidyl-peptidase activity	1		54	0.106724		3.10102	0.509912	1	0.629306	0.222209
frizzled binding	2		131	0.213447		1.8713	0.514013	1	0.633594	0.223723	,
helicase activity	4		286	0.426894		1.39173	0.517759	1	0.637436	0.22494	,,,
metallocarboxypeptidase activity	2		132	0.213447		1.85725	0.518067	1	0.63704	0.22494	,
phosphatidylinositol 3-kinase binding	1		56	0.106724		2.99269	0.522693	1	0.641948	0.226673
hydrolase activity	5		366	0.533618		1.2959	0.525101	1	0.644124	0.227166	,,,,
damaged DNA binding	5		366	0.533618		1.2959	0.525101	1	0.643344	0.227166	,,,,
MAP kinase activity	1		57	0.106724		2.94131	0.528958	1	0.647285	0.228282
toxic substance binding	1		57	0.106724		2.94131	0.528958	1	0.646504	0.228282
transmembrane transporter activity	2		135	0.213447		1.81636	0.530093	1	0.64711	0.228496	,
iron-sulfur cluster binding	1		58	0.106724		2.89167	0.53514	1	0.652484	0.230116
G-protein beta-subunit binding	1		58	0.106724		2.89167	0.53514	1	0.651699	0.230116
protein kinase activator activity	2		137	0.213447		1.79008	0.537997	1	0.65439	0.230796	,
transcription cofactor activity	5		372	0.533618		1.27507	0.539447	1	0.655367	0.230796	,,,,
vascular endothelial growth factor-activated receptor activity	1		59	0.106724		2.84368	0.541242	1	0.656759	0.230796
purinergic nucleotide receptor activity	1		59	0.106724		2.84368	0.541242	1	0.655972	0.230796
extracellular ATP-gated cation channel activity	1		59	0.106724		2.84368	0.541242	1	0.655188	0.230796
cysteine-type endopeptidase activity involved in apoptotic process	1		59	0.106724		2.84368	0.541242	1	0.654405	0.230796
oxygen transporter activity	1		59	0.106724		2.84368	0.541242	1	0.653624	0.230796
enzyme inhibitor activity	2		138	0.213447		1.77723	0.541914	1	0.653655	0.230807	,
catalytic activity	3		217	0.320171		1.48282	0.543051	1	0.654247	0.231016	,,
dynein light intermediate chain binding	1		60	0.106724		2.79725	0.547264	1	0.658538	0.232255
DNA polymerase binding	1		60	0.106724		2.79725	0.547264	1	0.657756	0.232255
beta-catenin binding	5		379	0.533618		1.2516	0.555926	1	0.667374	0.235651	,,,,
FAD binding	2		142	0.213447		1.7276	0.55735	1	0.668292	0.235975	,
MAP kinase kinase activity	1		62	0.106724		2.7088	0.559071	1	0.669562	0.236424
chemoattractant activity	2		143	0.213447		1.71562	0.561151	1	0.671258	0.237023	,
5'-nucleotidase activity	1		63	0.106724		2.66664	0.564859	1	0.674896	0.23799
fibroblast growth factor binding	2		144	0.213447		1.70381	0.564928	1	0.674183	0.23799	,
Rho guanyl-nucleotide exchange factor activity	6		462	0.640342		1.19173	0.565439	1	0.673998	0.23799	,,,,,
acyl-CoA dehydrogenase activity	1		64	0.106724		2.62577	0.570571	1	0.679315	0.239586
transcription factor activity, RNA polymerase II core promoter sequence-specific	1		64	0.106724		2.62577	0.570571	1	0.678517	0.239586
double-stranded DNA binding	6		465	0.640342		1.18406	0.571727	1	0.679093	0.239789	,,,,,
structural constituent of muscle	4		308	0.426894		1.29272	0.575963	1	0.683323	0.240259	,,,
SMAD binding	2		147	0.213447		1.66933	0.576119	1	0.682708	0.240259	,
exonuclease activity	1		65	0.106724		2.58614	0.576208	1	0.682015	0.240259
retinoic acid binding	1		65	0.106724		2.58614	0.576208	1	0.681218	0.240259
phospholipid-translocating ATPase activity	1		65	0.106724		2.58614	0.576208	1	0.680423	0.240259
serine-type endopeptidase inhibitor activity	6		468	0.640342		1.17649	0.57797	1	0.681708	0.240575	,,,,,
retinoic acid receptor binding	1		66	0.106724		2.54768	0.581771	1	0.685393	0.240575
histone methyltransferase activity	1		66	0.106724		2.54768	0.581771	1	0.684596	0.240575
dipeptidase activity	1		66	0.106724		2.54768	0.581771	1	0.683801	0.240575
Wnt-activated receptor activity	1		66	0.106724		2.54768	0.581771	1	0.683007	0.240575
misfolded protein binding	1		66	0.106724		2.54768	0.581771	1	0.682216	0.240575
acyl-CoA hydrolase activity	1		66	0.106724		2.54768	0.581771	1	0.681426	0.240575
RNA polymerase II distal enhancer sequence-specific DNA binding	3		230	0.320171		1.39946	0.582352	1	0.681318	0.240575	,,
miRNA binding	1		67	0.106724		2.51035	0.587261	1	0.686269	0.242323
tumor necrosis factor receptor binding	1		68	0.106724		2.4741	0.59268	1	0.691801	0.243995
DNA replication origin binding	1		68	0.106724		2.4741	0.59268	1	0.691004	0.243995
ankyrin binding	2		153	0.213447		1.6044	0.597865	1	0.696248	0.244786	,
endodeoxyribonuclease activity	1		69	0.106724		2.43888	0.598027	1	0.695636	0.244786
dynein binding	1		69	0.106724		2.43888	0.598027	1	0.694837	0.244786
apolipoprotein binding	1		69	0.106724		2.43888	0.598027	1	0.69404	0.244786
cullin family protein binding	1		69	0.106724		2.43888	0.598027	1	0.693245	0.244786
protein heterodimerization activity	16		1276	1.70758		1.02841	0.606694	1	0.702488	0.24805	,,,,,,,,,,,,,,,
oxidoreductase activity, acting on the CH-CH group of donors, with a flavin as acceptor	1		71	0.106724		2.37137	0.608512	1	0.703787	0.248509
Ras guanyl-nucleotide exchange factor activity	8		645	0.853789		1.08992	0.611232	1	0.706126	0.249335	,,,,,,,
phosphatase binding	3		242	0.320171		1.33043	0.616667	1	0.711593	0.251265	,,
NAD+ binding	1		73	0.106724		2.3075	0.618723	1	0.713153	0.251816
metalloendopeptidase inhibitor activity	1		75	0.106724		2.24697	0.628669	1	0.723792	0.254992
enhancer binding	1		75	0.106724		2.24697	0.628669	1	0.722969	0.254992
mitogen-activated protein kinase kinase binding	1		75	0.106724		2.24697	0.628669	1	0.722149	0.254992
SH3 domain binding	4		332	0.426894		1.19962	0.634654	1	0.728198	0.257128	,,,
cholesterol transporter activity	1		77	0.106724		2.18954	0.638355	1	0.731615	0.258335
oxidoreductase activity, acting on paired donors, with incorporation or reduction of molecular oxygen, NAD(P)H as one donor, and incorporation of one atom of oxygen	1		78	0.106724		2.16191	0.643104	1	0.736223	0.25935
ammonium transmembrane transporter activity	1		78	0.106724		2.16191	0.643104	1	0.735391	0.25935
glycine binding	1		78	0.106724		2.16191	0.643104	1	0.734561	0.25935
potassium channel regulator activity	3		252	0.320171		1.27789	0.643768	1	0.734491	0.25935	,,
phosphatidylinositol phospholipase C activity	2		167	0.213447		1.4709	0.645307	1	0.735418	0.259677	,
calcium-activated potassium channel activity	1		79	0.106724		2.13497	0.647789	1	0.737416	0.260383
tubulin binding	3		254	0.320171		1.26788	0.649023	1	0.73799	0.260503	,,
carbohydrate binding	10		830	1.06724		1.03057	0.649544	1	0.737754	0.260503	,,,,,,,,,
bicarbonate transmembrane transporter activity	1		80	0.106724		2.1087	0.652414	1	0.740183	0.261067
Ras GTPase binding	1		80	0.106724		2.1087	0.652414	1	0.739354	0.261067
endopeptidase inhibitor activity	2		170	0.213447		1.44513	0.654878	1	0.741316	0.26176	,
growth factor binding	1		83	0.106724		2.03361	0.665926	1	0.75298	0.265756
protein binding, bridging	4		346	0.426894		1.15126	0.666361	1	0.752631	0.265756	,,,
L-amino acid transmembrane transporter activity	1		84	0.106724		2.00975	0.670313	1	0.75625	0.266736
aldo-keto reductase (NADP) activity	1		84	0.106724		2.00975	0.670313	1	0.755408	0.266736
low-density lipoprotein receptor activity	1		85	0.106724		1.98645	0.674642	1	0.759441	0.267862
anion transmembrane transporter activity	1		85	0.106724		1.98645	0.674642	1	0.758597	0.267862
nucleosomal DNA binding	1		86	0.106724		1.96369	0.678914	1	0.762554	0.268961
hydrogen ion transmembrane transporter activity	1		86	0.106724		1.96369	0.678914	1	0.761708	0.268961
phosphatidic acid binding	1		87	0.106724		1.94143	0.68313	1	0.76559	0.270235
phospholipid binding	5		439	0.533618		1.08102	0.683643	1	0.765317	0.270235	,,,,
mitogen-activated protein kinase binding	1		88	0.106724		1.91968	0.687291	1	0.768551	0.271377
single-stranded RNA binding	2		181	0.213447		1.35791	0.688208	1	0.768727	0.271439	,
GTPase activator activity	18		1508	1.92102		0.971235	0.689575	1	0.769405	0.271679	,,,,,,,,,,,,,,,,,
protein tyrosine kinase activity	8		694	0.853789		1.01311	0.690666	1	0.769773	0.271797	,,,,,,,
laminin binding	1		89	0.106724		1.89841	0.691397	1	0.769741	0.271797
aspartic-type endopeptidase activity	1		93	0.106724		1.81784	0.707291	1	0.78657	0.277739
carboxylic ester hydrolase activity	2		190	0.213447		1.29401	0.713469	1	0.79257	0.279858	,
cation channel activity	1		96	0.106724		1.76176	0.718672	1	0.797474	0.28159
cytoskeletal adaptor activity	1		98	0.106724		1.72626	0.726013	1	0.804737	0.284154
14-3-3 protein binding	1		99	0.106724		1.70904	0.729611	1	0.807841	0.28525
transmembrane receptor protein tyrosine phosphatase activity	1		100	0.106724		1.69216	0.733162	1	0.810886	0.286013
Wnt-protein binding	1		100	0.106724		1.69216	0.733162	1	0.81	0.286013
GTPase regulator activity	1		101	0.106724		1.67561	0.736667	1	0.812985	0.287067
histone deacetylase activity	2		202	0.213447		1.21761	0.744457	1	0.820687	0.289786	,
transferase activity	2		204	0.213447		1.20574	0.749333	1	0.825163	0.291261	,
antiporter activity	1		105	0.106724		1.61253	0.750231	1	0.825254	0.291261
manganese ion binding	3		298	0.320171		1.08146	0.750692	1	0.824864	0.291261	,,
thiol-dependent ubiquitin-specific protease activity	4		390	0.426894		1.02179	0.753378	1	0.826918	0.291961	,,,
beta-2-microglobulin binding	2		206	0.213447		1.19411	0.754129	1	0.826846	0.291961	,
activating transcription factor binding	1		107	0.106724		1.58274	0.756749	1	0.828821	0.292658
oxidoreductase activity	5		482	0.533618		0.984834	0.758448	1	0.829783	0.292998	,,,,
proline-rich region binding	1		109	0.106724		1.55403	0.763097	1	0.833968	0.294158
lysophospholipase activity	1		109	0.106724		1.55403	0.763097	1	0.833069	0.294158
nucleocytoplasmic transporter activity	1		110	0.106724		1.54006	0.766209	1	0.835564	0.294405
ferrous iron binding	1		110	0.106724		1.54006	0.766209	1	0.834665	0.294405
receptor signaling complex scaffold activity	1		110	0.106724		1.54006	0.766209	1	0.833767	0.294405
TAP binding	1		116	0.106724		1.46125	0.784041	1	0.852255	0.300288
protein phosphatase inhibitor activity	1		116	0.106724		1.46125	0.784041	1	0.85134	0.300288
zinc ion transmembrane transporter activity	1		116	0.106724		1.46125	0.784041	1	0.850428	0.300288
protein-cysteine S-palmitoyltransferase activity	1		119	0.106724		1.42479	0.79244	1	0.858619	0.30318
cysteine-type endopeptidase inhibitor activity involved in apoptotic process	1		124	0.106724		1.36792	0.805721	1	0.872074	0.30761
methyltransferase activity	2		230	0.213447		1.07018	0.805741	1	0.871164	0.30761	,
metallopeptidase activity	3		330	0.320171		0.976985	0.80869	1	0.87342	0.308407	,,
scavenger receptor activity	2		236	0.213447		1.04311	0.81704	1	0.881497	0.311259	,
flavin adenine dinucleotide binding	3		337	0.320171		0.956766	0.819743	1	0.883471	0.311956	,,
RNA polymerase II transcription factor binding	2		238	0.213447		1.03439	0.820674	1	0.883534	0.311978	,
calcium channel regulator activity	1		135	0.106724		1.25748	0.832026	1	0.894804	0.315957
spectrin binding	1		138	0.106724		1.23039	0.838561	1	0.900874	0.318055
enzyme activator activity	2		249	0.213447		0.988927	0.839523	1	0.900952	0.318055	,
core promoter binding	3		351	0.320171		0.91874	0.840221	1	0.900746	0.318055	,,
protein serine/threonine kinase activity	20		1859	2.13447		0.869846	0.84385	1	0.903679	0.318791	,,,,,,,,,,,,,,,,,,,
chromatin DNA binding	2		252	0.213447		0.977212	0.844343	1	0.903251	0.318791	,
histone acetyltransferase binding	1		141	0.106724		1.20444	0.844842	1	0.90283	0.318791
calmodulin-dependent protein kinase activity	1		142	0.106724		1.19603	0.846881	1	0.904054	0.319223
guanyl-nucleotide exchange factor activity	6		645	0.640342		0.854264	0.85025	1	0.906695	0.320055	,,,,,
inorganic anion exchanger activity	1		144	0.106724		1.17956	0.850879	1	0.90641	0.320055
tumor necrosis factor-activated receptor activity	1		146	0.106724		1.16354	0.854772	1	0.9096	0.320844
ubiquitin conjugating enzyme binding	1		146	0.106724		1.16354	0.854772	1	0.908645	0.320844
heparin binding	9		927	0.960512		0.840841	0.858418	1	0.911562	0.320919	,,,,,,,,
protein serine/threonine/tyrosine kinase activity	1		148	0.106724		1.14795	0.858565	1	0.910762	0.320919
anion:anion antiporter activity	1		148	0.106724		1.14795	0.858565	1	0.909809	0.320919
cysteine-type endopeptidase inhibitor activity	1		148	0.106724		1.14795	0.858565	1	0.908857	0.320919
peptidase activity	3		369	0.320171		0.874075	0.86357	1	0.913201	0.322229	,,
potassium channel activity	1		151	0.106724		1.12533	0.864068	1	0.912773	0.322229
extracellular matrix structural constituent	3		370	0.320171		0.87172	0.864775	1	0.912567	0.322229	,,
sodium channel regulator activity	1		158	0.106724		1.07587	0.876092	1	0.923547	0.326106
RNA polymerase II transcription corepressor activity	1		161	0.106724		1.05597	0.880914	1	0.927664	0.32756
protein tyrosine phosphatase activity	4		488	0.426894		0.817115	0.883559	1	0.929482	0.328202	,,,
cyclin-dependent protein serine/threonine kinase activity	1		166	0.106724		1.0244	0.888538	1	0.933749	0.329367
kinesin binding	1		166	0.106724		1.0244	0.888538	1	0.932781	0.329367
serine-type peptidase activity	2		287	0.213447		0.858556	0.891591	1	0.935016	0.330156	,
WW domain binding	1		169	0.106724		1.00635	0.892876	1	0.935394	0.33029
histone binding	5		603	0.533618		0.787623	0.897528	1	0.939295	0.331592	,,,,
iron ion binding	6		701	0.640342		0.786142	0.898253	1	0.939082	0.331592	,,,,,
RNA polymerase II core promoter sequence-specific DNA binding	2		294	0.213447		0.838201	0.899279	1	0.939185	0.331628	,
beta-amyloid binding	1		177	0.106724		0.961187	0.903638	1	0.942765	0.332892
RNA polymerase II activating transcription factor binding	1		179	0.106724		0.950522	0.906155	1	0.944417	0.333133
repressing transcription factor binding	1		179	0.106724		0.950522	0.906155	1	0.943446	0.333133
protein self-association	1		194	0.106724		0.877498	0.923055	1	0.960053	0.338997
oxygen binding	1		196	0.106724		0.868601	0.925065	1	0.961156	0.339386
ligand-dependent nuclear receptor transcription coactivator activity	2		324	0.213447		0.760888	0.926808	1	0.961979	0.339408	,
signal transducer activity, downstream of receptor	1		198	0.106724		0.859882	0.927023	1	0.961217	0.339408
peptide antigen binding	8		946	0.853789		0.743587	0.929435	1	0.962731	0.339942	,,,,,,,
protein kinase inhibitor activity	1		210	0.106724		0.811037	0.937744	1	0.970344	0.342631
1-phosphatidylinositol-3-kinase activity	1		224	0.106724		0.760628	0.948279	1	0.980243	0.346126
phosphatidylinositol-4,5-bisphosphate 3-kinase activity	2		358	0.213447		0.688877	0.949384	1	0.980385	0.346176	,
4 iron, 4 sulfur cluster binding	1		229	0.106724		0.744111	0.951593	1	0.981664	0.346628
transcription regulatory region sequence-specific DNA binding	1		242	0.106724		0.704343	0.95925	1	0.988555	0.349061
core promoter sequence-specific DNA binding	1		252	0.106724		0.676531	0.964306	1	0.992755	0.350544
calcium channel activity	2		394	0.213447		0.626133	0.965986	1	0.993473	0.350662	,
voltage-gated calcium channel activity	1		257	0.106724		0.663433	0.966594	1	0.99309	0.350662
transmembrane signaling receptor activity	5		768	0.533618		0.618682	0.973388	1	0.999055	0.352769	,,,,
transcription factor binding	11		1412	1.17396		0.660042	0.9782	1	1	0.353102	,,,,,,,,,,
nucleic acid binding	4		719	0.426894		0.555048	0.985196	1	1	0.353102	,,,
cytokine activity	2		471	0.213447		0.524042	0.985746	1	1	0.353102	,
receptor activity	7		1071	0.747065		0.585885	0.98711	1	1	0.353102	,,,,,,
heme binding	3		617	0.320171		0.523455	0.987856	1	1	0.353102	,,
metalloendopeptidase activity	2		498	0.213447		0.495701	0.989548	1	1	0.353102	,
transcription coactivator activity	10		1418	1.06724		0.603599	0.98986	1	1	0.353102	,,,,,,,,,
serine-type endopeptidase activity	6		1074	0.640342		0.513432	0.995218	1	1	0.353102	,,,,,
p53 binding	1		408	0.106724		0.418648	0.995492	1	1	0.353102
antigen binding	2		584	0.213447		0.42286	0.996167	1	1	0.353102	,
ubiquitin protein ligase activity	4		888	0.426894		0.449563	0.997239	1	1	0.353102	,,,
transcription corepressor activity	5		1020	0.533618		0.466018	0.99741	1	1	0.353102	,,,,
transcriptional repressor activity, RNA polymerase II core promoter proximal region sequence-specific binding	1		529	0.106724		0.323115	0.999097	1	1	0.353102
transcription regulatory region DNA binding	5		1133	0.533618		0.419591	0.999156	1	1	0.353102	,,,,
RNA polymerase II transcription factor activity, sequence-specific DNA binding	1		745	0.106724		0.22959	0.999949	1	1	0.353102
ubiquitin-protein transferase activity	5		1442	0.533618		0.329756	0.999967	1	1	0.353102	,,,,
RNA polymerase II regulatory region sequence-specific DNA binding	2		1033	0.213447		0.239283	0.999984	1	1	0.353102	,
metal ion binding	75		9099	8.00427		0.63803	0.999999	1	1	0.353102	,,,,,,,,,,,,,,,,,,,,,,,,,,,,,,,,,,,,,,,,,,,,,,,,,,,,,,,,,,,,,,,,,,,,,,,,,,
RNA polymerase II core promoter proximal region sequence-specific DNA binding	4		1651	0.426894		0.241957	0.999999	1	1	0.353102	,,,
chromatin binding	7		2102	0.747065		0.298688	0.999999	1	1	0.353102	,,,,,,
transcriptional activator activity, RNA polymerase II core promoter proximal region sequence-specific binding	1		1217	0.106724		0.140637	1	1	1	0.353102
G-protein coupled receptor activity	5		2074	0.533618		0.229332	1	1	1	0.353102	,,,,
sequence-specific DNA binding	2		1810	0.213447		0.136634	1	1	1	0.353102	,
zinc ion binding	30		5820	3.20171		0.408779	1	1	1	0.353102	,,,,,,,,,,,,,,,,,,,,,,,,,,,,,
transcription factor activity, sequence-specific DNA binding	4		4149	0.426894		0.0963252	1	1	1	0.353102	,,,
DNA binding	35		6509	3.73533		0.423999	1	1	1	0.353102	,,,,,,,,,,,,,,,,,,,,,,,,,,,,,,,,,,

## Sheet: WM115 Biological process
Analysis:Biological process
Name of data set: WM115
Number of protein in data set: 973
Number of protein mapped to Biological process : 961
Biological process	No. of genes in the data set		No. of genes in the background data set	Percentage of genes		Fold Enrichment	Uncorrected p-value (Hypergeometric test)	Corrected p-value (Bonferroni method)	Corrected p-value (BH method)	Storey and Tibshirani method q-value	Genes mapped from input data set
translational initiation	80		544	8.32466		11.9401	1.75407e-59	6.49005e-56	6.49005e-56	1.99229e-56	,,,,,,,,,,,,,,,,,,,,,,,,,,,,,,,,,,,,,,,,,,,,,,,,,,,,,,,,,,,,,,,,,,,,,,,,,,,,,,,
nuclear-transcribed mRNA catabolic process, nonsense-mediated decay	65		545	6.76379		9.71793	1.21075e-42	4.47978e-39	2.23989e-39	6.87592e-40	,,,,,,,,,,,,,,,,,,,,,,,,,,,,,,,,,,,,,,,,,,,,,,,,,,,,,,,,,,,,,,,,
SRP-dependent cotranslational protein targeting to membrane	58		416	6.03538		11.3781	5.19551e-42	1.92234e-38	6.4078e-39	1.96704e-39	,,,,,,,,,,,,,,,,,,,,,,,,,,,,,,,,,,,,,,,,,,,,,,,,,,,,,,,,,
translation	70		744	7.28408		7.66059	4.99167e-39	1.84692e-35	4.6173e-36	1.4174e-36	,,,,,,,,,,,,,,,,,,,,,,,,,,,,,,,,,,,,,,,,,,,,,,,,,,,,,,,,,,,,,,,,,,,,,
viral transcription	57		519	5.93132		8.97146	1.45864e-35	5.39698e-32	1.0794e-32	3.31348e-33	,,,,,,,,,,,,,,,,,,,,,,,,,,,,,,,,,,,,,,,,,,,,,,,,,,,,,,,,
regulation of cellular amino acid metabolic process	34		239	3.53798		11.7564	1.89308e-25	7.0044e-22	1.1674e-22	3.58363e-23	,,,,,,,,,,,,,,,,,,,,,,,,,,,,,,,,,
Wnt signaling pathway, planar cell polarity pathway	42		413	4.37045		8.36571	3.33303e-25	1.23322e-21	1.76175e-22	5.40813e-23	,,,,,,,,,,,,,,,,,,,,,,,,,,,,,,,,,,,,,,,,,
rRNA processing	59		907	6.13944		5.31534	1.26624e-24	4.6851e-21	5.85638e-22	1.79777e-22	,,,,,,,,,,,,,,,,,,,,,,,,,,,,,,,,,,,,,,,,,,,,,,,,,,,,,,,,,,
regulation of mRNA stability	45		538	4.68262		6.87228	2.15094e-23	7.95848e-20	8.84276e-21	2.71451e-21	,,,,,,,,,,,,,,,,,,,,,,,,,,,,,,,,,,,,,,,,,,,,
NIK/NF-kappaB signaling	34		305	3.53798		9.22279	6.04878e-22	2.23805e-18	2.23805e-19	6.87027e-20	,,,,,,,,,,,,,,,,,,,,,,,,,,,,,,,,,
stimulatory C-type lectin receptor signaling pathway	41		523	4.26639		6.45754	2.13172e-20	7.88737e-17	7.17033e-18	2.20112e-18	,,,,,,,,,,,,,,,,,,,,,,,,,,,,,,,,,,,,,,,,
negative regulation of ubiquitin-protein ligase activity involved in mitotic cell cycle	33		347	3.43392		7.88041	3.34715e-19	1.23845e-15	1.03204e-16	3.16811e-17	,,,,,,,,,,,,,,,,,,,,,,,,,,,,,,,,
positive regulation of ubiquitin-protein ligase activity involved in regulation of mitotic cell cycle transition	34		374	3.53798		7.52692	3.96884e-19	1.46847e-15	1.12959e-16	3.46757e-17	,,,,,,,,,,,,,,,,,,,,,,,,,,,,,,,,,
anaphase-promoting complex-dependent catabolic process	33		395	3.43392		6.92581	1.6661e-17	6.16456e-14	4.40326e-15	1.35169e-15	,,,,,,,,,,,,,,,,,,,,,,,,,,,,,,,,
Fc-epsilon receptor signaling pathway	44		798	4.57856		4.53644	4.76623e-16	1.76351e-12	1.17567e-13	3.60903e-14	,,,,,,,,,,,,,,,,,,,,,,,,,,,,,,,,,,,,,,,,,,,
tumor necrosis factor-mediated signaling pathway	36		545	3.7461		5.46404	9.70162e-16	3.5896e-12	2.2435e-13	6.887e-14	,,,,,,,,,,,,,,,,,,,,,,,,,,,,,,,,,,,
positive regulation of canonical Wnt signaling pathway	39		649	4.05827		4.95981	1.39638e-15	5.16659e-12	3.03917e-13	9.32952e-14	,,,,,,,,,,,,,,,,,,,,,,,,,,,,,,,,,,,,,,
protein folding	40		700	4.16233		4.71336	3.20264e-15	1.18498e-11	6.5832e-13	2.02088e-13	,,,,,,,,,,,,,,,,,,,,,,,,,,,,,,,,,,,,,,,
ephrin receptor signaling pathway	31		458	3.22581		5.62678	4.96698e-14	1.83778e-10	9.67255e-12	2.96924e-12	,,,,,,,,,,,,,,,,,,,,,,,,,,,,,,
negative regulation of canonical Wnt signaling pathway	40		768	4.16233		4.29671	6.50382e-14	2.40641e-10	1.20321e-11	3.69355e-12	,,,,,,,,,,,,,,,,,,,,,,,,,,,,,,,,,,,,,,,
MAPK cascade	53		1300	5.51509		3.34055	1.13063e-13	4.18332e-10	1.99206e-11	6.11513e-12	,,,,,,,,,,,,,,,,,,,,,,,,,,,,,,,,,,,,,,,,,,,,,,,,,,,,
movement of cell or subcellular component	30		457	3.12175		5.4642	2.78553e-13	1.03064e-09	4.68475e-11	1.4381e-11	,,,,,,,,,,,,,,,,,,,,,,,,,,,,,
antigen processing and presentation of exogenous peptide antigen via MHC class I, TAP-dependent	39		774	4.05827		4.16009	3.7409e-13	1.38413e-09	6.01797e-11	1.84737e-11	,,,,,,,,,,,,,,,,,,,,,,,,,,,,,,,,,,,,,,
tRNA aminoacylation for protein translation	20		188	2.08117		8.99709	4.1483e-13	1.53487e-09	6.3953e-11	1.9632e-11	,,,,,,,,,,,,,,,,,,,
T cell receptor signaling pathway	50		1336	5.20291		3.07086	1.22784e-11	4.54301e-08	1.8172e-09	5.57838e-10	,,,,,,,,,,,,,,,,,,,,,,,,,,,,,,,,,,,,,,,,,,,,,,,,,
chaperone-mediated protein folding	19		235	1.97711		6.86803	1.94174e-10	7.18444e-07	2.76325e-08	8.4825e-09	,,,,,,,,,,,,,,,,,,
canonical glycolysis	15		140	1.56087		9.21816	3.15429e-10	1.16709e-06	4.32255e-08	1.32692e-08	,,,,,,,,,,,,,,
intracellular protein transport	41		1098	4.26639		3.07971	9.31186e-10	3.44539e-06	1.2305e-07	3.77732e-08	,,,,,,,,,,,,,,,,,,,,,,,,,,,,,,,,,,,,,,,,
leukocyte migration	32		724	3.32986		3.67353	1.24113e-09	4.5922e-06	1.58352e-07	4.86101e-08	,,,,,,,,,,,,,,,,,,,,,,,,,,,,,,,
viral process	64		2261	6.65973		2.3111	1.86378e-09	6.89598e-06	2.29866e-07	7.05633e-08	,,,,,,,,,,,,,,,,,,,,,,,,,,,,,,,,,,,,,,,,,,,,,,,,,,,,,,,,,,,,,,,
proteasome-mediated ubiquitin-dependent protein catabolic process	40		1100	4.16233		3.00135	3.12999e-09	1.1581e-05	3.7358e-07	1.1468e-07	,,,,,,,,,,,,,,,,,,,,,,,,,,,,,,,,,,,,,,,
protein polyubiquitination	37		1004	3.85016		3.04885	8.60483e-09	3.18379e-05	9.94933e-07	3.0542e-07	,,,,,,,,,,,,,,,,,,,,,,,,,,,,,,,,,,,,
cortical actin cytoskeleton organization	13		130	1.35276		8.69951	1.10772e-08	4.09856e-05	1.24199e-06	3.8126e-07	,,,,,,,,,,,,
regulation of translational initiation	13		134	1.35276		8.44222	1.59959e-08	5.91848e-05	1.74073e-06	5.34362e-07	,,,,,,,,,,,,
small GTPase mediated signal transduction	35		946	3.64204		3.06636	1.96394e-08	7.26659e-05	2.07617e-06	6.37333e-07	,,,,,,,,,,,,,,,,,,,,,,,,,,,,,,,,,,
platelet aggregation	16		230	1.66493		5.97704	4.3358e-08	0.000160425	4.45624e-06	1.36796e-06	,,,,,,,,,,,,,,,
positive regulation of telomerase RNA localization to Cajal body	10		77	1.04058		11.5199	4.4613e-08	0.000165068	4.4613e-06	1.36951e-06	,,,,,,,,,
positive regulation of protein localization to Cajal body	8		45	0.832466		16.0254	8.11346e-08	0.000300198	7.89994e-06	2.42509e-06	,,,,,,,
Fc-gamma receptor signaling pathway involved in phagocytosis	25		572	2.60146		3.66914	9.67804e-08	0.000358087	9.18173e-06	2.81857e-06	,,,,,,,,,,,,,,,,,,,,,,,,
translational elongation	8		48	0.832466		15.0492	1.37427e-07	0.000508479	1.2712e-05	3.90227e-06	,,,,,,,
regulation of macroautophagy	14		195	1.45682		6.22643	2.03307e-07	0.000752235	1.83472e-05	5.63214e-06	,,,,,,,,,,,,,
IRES-dependent viral translational initiation	7		37	0.728408		17.2823	3.39936e-07	0.00125776	2.99467e-05	9.19292e-06	,,,,,,
purine ribonucleoside monophosphate biosynthetic process	8		54	0.832466		13.4149	3.54755e-07	0.00131259	3.05254e-05	9.21147e-06	,,,,,,,
retrograde vesicle-mediated transport, Golgi to ER	20		412	2.08117		4.12027	3.56842e-07	0.00132032	3.00072e-05	9.21147e-06	,,,,,,,,,,,,,,,,,,,
gluconeogenesis	14		208	1.45682		5.83961	4.45945e-07	0.00165	3.66666e-05	1.12558e-05	,,,,,,,,,,,,,
cytoplasmic translation	10		101	1.04058		8.81593	5.97196e-07	0.00220963	4.80354e-05	1.47457e-05	,,,,,,,,,
protein stabilization	27		730	2.80957		3.09551	8.03939e-07	0.00297458	6.32889e-05	1.94281e-05	,,,,,,,,,,,,,,,,,,,,,,,,,,
ER to Golgi vesicle-mediated transport	28		779	2.91363		3.0038	8.84244e-07	0.0032717	6.81605e-05	2.09236e-05	,,,,,,,,,,,,,,,,,,,,,,,,,,,
NLS-bearing protein import into nucleus	10		108	1.04058		8.25107	1.11303e-06	0.0041182	8.4045e-05	2.57998e-05	,,,,,,,,,
substrate adhesion-dependent cell spreading	13		200	1.35276		5.67359	1.68508e-06	0.00623479	0.000124696	3.82786e-05	,,,,,,,,,,,,
Arp2/3 complex-mediated actin nucleation	8		67	0.832466		10.8597	1.92824e-06	0.0071345	0.000139892	4.29435e-05	,,,,,,,
gene expression	14		240	1.45682		5.06503	2.4384e-06	0.00902207	0.000173501	5.32607e-05	,,,,,,,,,,,,,
positive regulation of establishment of protein localization to telomere	7		51	0.728408		12.6516	3.28536e-06	0.0121558	0.000229355	7.04064e-05	,,,,,,
vascular endothelial growth factor receptor signaling pathway	19		448	1.97711		3.61174	4.97353e-06	0.0184021	0.000340779	0.000104311	,,,,,,,,,,,,,,,,,,
glutamine metabolic process	8		76	0.832466		9.5945	5.05112e-06	0.0186891	0.000339803	0.000104311	,,,,,,,
viral RNA genome replication	6		36	0.62435		15.5952	5.22611e-06	0.0193366	0.000345297	0.000105998	,,,,,
'de novo' IMP biosynthetic process	5		22	0.520291		21.5395	6.57437e-06	0.0243252	0.000426757	0.000131004	,,,,
'de novo' protein folding	8		79	0.832466		9.23583	6.76293e-06	0.0250229	0.000431428	0.000132438	,,,,,,,
ribosomal small subunit biogenesis	7		57	0.728408		11.3485	7.03174e-06	0.0260174	0.000440973	0.000133112	,,,,,,
pentose-phosphate shunt	7		57	0.728408		11.3485	7.03174e-06	0.0260174	0.000433624	0.000133112	,,,,,,
regulation of ruffle assembly	6		38	0.62435		14.8005	7.25175e-06	0.0268315	0.00043986	0.000135026	,,,,,
positive regulation of RNA polymerase II transcriptional preinitiation complex assembly	7		58	0.728408		11.1569	7.91103e-06	0.0292708	0.00047211	0.000144926	,,,,,,
toxin transport	11		168	1.14464		5.79945	9.76337e-06	0.0361245	0.000573404	0.000176021	,,,,,,,,,,
protein transport	45		1795	4.68262		2.06312	1.10371e-05	0.0408373	0.000638083	0.000195876	,,,,,,,,,,,,,,,,,,,,,,,,,,,,,,,,,,,,,,,,,,,,
positive regulation of translation	14		279	1.45682		4.36017	1.35991e-05	0.0503167	0.000774103	0.000237631	,,,,,,,,,,,,,
membrane organization	11		176	1.14464		5.53769	1.51219e-05	0.0559511	0.000847744	0.000257472	,,,,,,,,,,
ribosomal protein import into nucleus	6		43	0.62435		13.1282	1.51879e-05	0.0561954	0.000838737	0.000257472	,,,,,
integrin-mediated signaling pathway	19		492	1.97711		3.28955	1.83836e-05	0.0680192	0.00100028	0.000307062	,,,,,,,,,,,,,,,,,,
transferrin transport	10		149	1.04058		5.99953	1.98602e-05	0.0734828	0.00106497	0.000326919	,,,,,,,,,
ribosomal small subunit assembly	7		67	0.728408		9.68569	2.0765e-05	0.0768305	0.00109758	0.00033693	,,,,,,
modulation by virus of host process	5		28	0.520291		17.1212	2.30617e-05	0.0853283	0.00120181	0.000368926	,,,,
viral translational termination-reinitiation	5		29	0.520291		16.5552	2.75802e-05	0.102047	0.00141732	0.000435082	,,,,
positive regulation of protein serine/threonine kinase activity	9		127	0.936524		6.40392	3.3445e-05	0.123746	0.00169516	0.000520372	,,,,,,,,
cerebellar cortex formation	3		6	0.312175		46.971	3.75395e-05	0.138896	0.00187698	0.000576186	,,
fructose 6-phosphate metabolic process	5		31	0.520291		15.5285	3.86554e-05	0.143025	0.001907	0.000585403	,,,,
actin cytoskeleton organization	23		724	2.39334		2.67919	5.50089e-05	0.203533	0.00267806	0.0008221	,,,,,,,,,,,,,,,,,,,,,,
nucleobase-containing compound metabolic process	10		170	1.04058		5.26382	6.11083e-05	0.226101	0.00293637	0.000901395	,,,,,,,,,
response to reactive oxygen species	12		244	1.2487		4.32898	6.67655e-05	0.247032	0.00316708	0.000972217	,,,,,,,,,,,
protein localization to endosome	5		35	0.520291		13.815	7.08735e-05	0.262232	0.00331939	0.00101897	,,,,
positive regulation of telomere maintenance via telomerase	10		175	1.04058		5.11449	7.78568e-05	0.28807	0.00360088	0.00110538	,,,,,,,,,
negative regulation of translation	13		288	1.35276		3.94749	8.05344e-05	0.297977	0.00367873	0.00112928	,,,,,,,,,,,,
negative regulation of apoptotic process	52		2377	5.41103		1.79408	8.56153e-05	0.316777	0.00386313	0.00118589	,,,,,,,,,,,,,,,,,,,,,,,,,,,,,,,,,,,,,,,,,,,,,,,,,,,
regulation of defense response to virus by virus	10		180	1.04058		4.9734	9.83484e-05	0.363889	0.00438421	0.00134017	,,,,,,,,,
membrane to membrane docking	4		20	0.416233		19.7961	9.91136e-05	0.36672	0.00436572	0.00134017	,,,
substantia nigra development	12		255	1.2487		4.14315	0.000101368	0.375061	0.00441249	0.00135453	,,,,,,,,,,,
osteoblast differentiation	18		520	1.87305		2.95913	0.000120758	0.446803	0.00519539	0.00158265	,,,,,,,,,,,,,,,,,
AMP biosynthetic process	4		21	0.416233		18.9064	0.000121227	0.448539	0.00515562	0.00158265	,,,
leukocyte cell-cell adhesion	9		155	0.936524		5.25633	0.000155755	0.576294	0.00654879	0.00198773	,,,,,,,,
actin filament bundle assembly	9		155	0.936524		5.25633	0.000155755	0.576294	0.00647521	0.00198773	,,,,,,,,
cell adhesion mediated by integrin	7		93	0.728408		7.01377	0.000171058	0.632914	0.00703238	0.00211922	,,,,,,
phagosome acidification	7		93	0.728408		7.01377	0.000171058	0.632914	0.0069551	0.00211922	,,,,,,
apical junction assembly	5		42	0.520291		11.5791	0.000172817	0.639423	0.00695025	0.00211922	,,,,
antigen processing and presentation of exogenous peptide antigen via MHC class II	28		1047	2.91363		2.23584	0.000173522	0.642031	0.00690356	0.00211922	,,,,,,,,,,,,,,,,,,,,,,,,,,,
cell migration	25		888	2.60146		2.36529	0.000176436	0.652813	0.00694482	0.00212274	,,,,,,,,,,,,,,,,,,,,,,,,
positive regulation of lamellipodium assembly	6		66	0.62435		8.63823	0.000177547	0.656925	0.006915	0.00212274	,,,,,
response to unfolded protein	10		194	1.04058		4.6168	0.000181464	0.671416	0.00699392	0.00214696	,,,,,,,,,
glycolytic process	8		125	0.832466		5.87069	0.00018464	0.683169	0.00704298	0.00216202	,,,,,,,
protein import into nucleus, docking	5		43	0.520291		11.3174	0.000193558	0.716163	0.00730779	0.00224331	,,,,
barbed-end actin filament capping	7		97	0.728408		6.72823	0.000222222	0.822221	0.00830526	0.00254951	,,,,,,
regulation of stress-activated MAPK cascade	4		25	0.416233		16.0254	0.000246276	0.91122	0.0091122	0.00276953	,,,
membrane raft assembly	4		25	0.416233		16.0254	0.000246276	0.91122	0.00902198	0.00276953	,,,
protein heterotetramerization	7		101	0.728408		6.46502	0.000285054	1	0.0103402	0.00314737	,,,,,,
cellular response to platelet-derived growth factor stimulus	6		72	0.62435		7.93066	0.000286627	1	0.0102963	0.00314737	,,,,,
mature ribosome assembly	4		26	0.416233		15.4373	0.000288188	1	0.0102528	0.00314737	,,,
protein refolding	6		73	0.62435		7.82385	0.000309029	1	0.0108896	0.00332077	,,,,,
ATP metabolic process	9		170	0.936524		4.79593	0.000309912	1	0.0108177	0.00332077	,,,,,,,,
regulation of cell adhesion	10		208	1.04058		4.30791	0.000317059	1	0.0109637	0.0033656	,,,,,,,,,
vesicle docking involved in exocytosis	8		137	0.832466		5.36112	0.000344438	1	0.0118002	0.00362237	,,,,,,,
platelet degranulation	20		669	2.08117		2.54039	0.000357327	1	0.0121295	0.00372278	,,,,,,,,,,,,,,,,,,,
oxaloacetate metabolic process	5		49	0.520291		9.96605	0.00036054	1	0.0121273	0.00372278	,,,,
microtubule-based process	8		139	0.832466		5.28467	0.000379642	1	0.0126547	0.0038847	,,,,,,,
positive regulation of establishment of protein localization to plasma membrane	9		176	0.936524		4.63358	0.000399488	1	0.0131974	0.00405127	,,,,,,,,
vesicle-mediated transport	17		530	1.76899		2.7526	0.000440825	1	0.0144341	0.00443091	,,,,,,,,,,,,,,,,
establishment of protein localization to plasma membrane	10		218	1.04058		4.11142	0.000458707	1	0.0148879	0.00451664	,,,,,,,,,
nucleobase-containing small molecule interconversion	8		143	0.832466		5.13813	0.000458838	1	0.0147626	0.00451664	,,,,,,,
protein heterooligomerization	12		301	1.2487		3.5126	0.000461283	1	0.0147133	0.00451664	,,,,,,,,,,,
L-ascorbic acid metabolic process	5		52	0.520291		9.40458	0.000476519	1	0.0150694	0.00462594	,,,,
negative regulation of epidermal growth factor receptor signaling pathway	9		181	0.936524		4.50646	0.000489507	1	0.0153489	0.00469686	,,,,,,,,
cell redox homeostasis	15		439	1.56087		2.95756	0.000492094	1	0.0153004	0.00469686	,,,,,,,,,,,,,,
viral release from host cell	4		30	0.416233		13.4613	0.000507807	1	0.0156574	0.00476671	,,,
protein localization to cytoplasmic stress granule	4		30	0.416233		13.4613	0.000507807	1	0.015528	0.00476671	,,,
regulation of early endosome to late endosome transport	4		31	0.416233		13.0439	0.000577311	1	0.0175086	0.00534061	,,,
ribosomal large subunit assembly	6		82	0.62435		6.97803	0.00057835	1	0.0173975	0.00534061	,,,,,
receptor internalization	11		267	1.14464		3.65911	0.000598854	1	0.017869	0.00548536	,,,,,,,,,,
purine nucleobase biosynthetic process	4		32	0.416233		12.6516	0.000653306	1	0.0193379	0.00587972	,,,
regulation of proteasomal protein catabolic process	6		84	0.62435		6.81432	0.000657438	1	0.0193057	0.00587972	,,,,,
post-Golgi vesicle-mediated transport	6		84	0.62435		6.81432	0.000657438	1	0.0191537	0.00587972	,,,,,
establishment of protein localization	9		191	0.936524		4.27205	0.000719651	1	0.0208024	0.00638584	,,,,,,,,
cortical microtubule organization	4		33	0.416233		12.2822	0.000736122	1	0.0211136	0.00648135	,,,
establishment of endothelial barrier	6		87	0.62435		6.58268	0.000791475	1	0.0225266	0.00691511	,,,,,
protein targeting	9		195	0.936524		4.18498	0.000833461	1	0.0235405	0.00722636	,,,,,,,,
response to endoplasmic reticulum stress	14		416	1.45682		2.92855	0.000864038	1	0.0242192	0.00737882	,,,,,,,,,,,,,
extracellular matrix disassembly	14		416	1.45682		2.92855	0.000864038	1	0.0240371	0.00737882	,,,,,,,,,,,,,
vesicle organization	7		122	0.728408		5.36347	0.000887086	1	0.0244942	0.00751912	,,,,,,
regulation of cell migration	13		371	1.35276		3.06732	0.000905845	1	0.0248269	0.00762125	,,,,,,,,,,,,
COPII vesicle coating	12		326	1.2487		3.24426	0.000924666	1	0.0251564	0.00772239	,,,,,,,,,,,
actin filament fragmentation	3		16	0.312175		19.7414	0.000957578	1	0.0258616	0.00788595	,,
cellular response to glucagon stimulus	8		160	0.832466		4.59644	0.000958136	1	0.0256892	0.00788595	,,,,,,,
endocytosis	20		728	2.08117		2.33486	0.00100771	1	0.0268241	0.00823434	,,,,,,,,,,,,,,,,,,,
erythrocyte homeostasis	4		36	0.416233		11.2931	0.00102879	1	0.0271895	0.00828733	,,,
negative regulation of protein export from nucleus	4		36	0.416233		11.2931	0.00102879	1	0.0269967	0.00828733	,,,
positive regulation of exosomal secretion	5		62	0.520291		7.91769	0.00107115	1	0.0279103	0.00855831	,,,,
actin cytoskeleton reorganization	11		287	1.14464		3.40523	0.0010775	1	0.0278794	0.00855831	,,,,,,,,,,
cytokinesis	10		244	1.04058		3.67555	0.00108701	1	0.02793	0.00857384	,,,,,,,,,
plasma membrane to endosome transport	4		37	0.416233		10.9978	0.0011422	1	0.0291457	0.00890124	,,,
heart contraction	5		63	0.520291		7.79446	0.00115168	1	0.0291864	0.00890124	,,,,
chaperone-mediated autophagy	3		17	0.312175		18.6597	0.00115203	1	0.0289966	0.00890124	,,
positive regulation of extrinsic apoptotic signaling pathway in absence of ligand	6		95	0.62435		6.03554	0.0012528	1	0.0313199	0.00958161	,,,,,
positive regulation of early endosome to late endosome transport	4		38	0.416233		10.7176	0.00126407	1	0.0313897	0.00958161	,,,
positive regulation of actin filament polymerization	9		207	0.936524		3.94383	0.00126539	1	0.0312129	0.00958161	,,,,,,,,
establishment or maintenance of cell polarity	8		168	0.832466		4.37917	0.00130973	1	0.0320927	0.00985167	,,,,,,,
cell-substrate junction assembly	5		65	0.520291		7.55916	0.00132606	1	0.032279	0.00990887	,,,,
regulation of cell shape	21		800	2.18522		2.22506	0.00133751	1	0.032345	0.00992912	,,,,,,,,,,,,,,,,,,,,
mitotic cytokinesis	8		170	0.832466		4.32803	0.00141192	1	0.0339228	0.0104135	,,,,,,,
cellular response to interleukin-4	7		133	0.728408		4.92401	0.0014654	1	0.0349805	0.0107382	,,,,,,
regulation of organelle assembly	3		19	0.312175		16.8168	0.00161146	1	0.0382204	0.0115029	,,
positive regulation by host of viral process	3		19	0.312175		16.8168	0.00161146	1	0.037977	0.0115029	,,
trachea formation	3		19	0.312175		16.8168	0.00161146	1	0.0377366	0.0115029	,,
ribosomal subunit export from nucleus	3		19	0.312175		16.8168	0.00161146	1	0.0374993	0.0115029	,,
cytoskeletal anchoring at plasma membrane	5		68	0.520291		7.23168	0.00162311	1	0.0375345	0.0115029	,,,,
platelet activation	17		598	1.76899		2.44025	0.00163053	1	0.0374717	0.0115029	,,,,,,,,,,,,,,,,
epithelial cell differentiation	13		399	1.35276		2.85274	0.00173059	1	0.0395259	0.0120994	,,,,,,,,,,,,
cytoskeleton-dependent intracellular transport	7		137	0.728408		4.78154	0.00173638	1	0.0394147	0.0120994	,,,,,,
heterotypic cell-cell adhesion	7		138	0.728408		4.7472	0.00180983	1	0.0408316	0.0125343	,,,,,,
establishment of Golgi localization	4		42	0.416233		9.7264	0.00184289	1	0.0413253	0.0126094	,,,
actin filament depolymerization	4		42	0.416233		9.7264	0.00184289	1	0.0410764	0.0126094	,,,
protein localization to plasma membrane	12		356	1.2487		2.97182	0.00193741	1	0.0429247	0.0131768	,,,,,,,,,,,
Rap protein signal transduction	4		43	0.416233		9.5066	0.00201205	1	0.0443129	0.0135874	,,,
negative regulation of protein ubiquitination	8		180	0.832466		4.08924	0.0020217	1	0.044262	0.0135874	,,,,,,,
glutathione metabolic process	9		223	0.936524		3.66244	0.00210447	1	0.0458031	0.0140604	,,,,,,,,
positive regulation of cytokinesis	8		182	0.832466		4.04461	0.00216534	1	0.0468524	0.0143376	,,,,,,,
positive regulation of oxidative stress-induced intrinsic apoptotic signaling pathway	3		21	0.312175		15.3052	0.00217119	1	0.0467059	0.0143376	,,
protein folding in endoplasmic reticulum	5		73	0.520291		6.7447	0.00222273	1	0.0475383	0.0145931	,,,,
glycogen catabolic process	6		107	0.62435		5.36648	0.00229845	1	0.0488751	0.0150035	,,,,,
epithelial cell-cell adhesion	4		45	0.416233		9.0955	0.00238197	1	0.0503618	0.0152851	,,,
negative regulation of defense response to virus	4		45	0.416233		9.0955	0.00238197	1	0.0500756	0.0152851	,,,
purine nucleotide biosynthetic process	4		45	0.416233		9.0955	0.00238197	1	0.0497927	0.0152851	,,,
establishment or maintenance of apical/basal cell polarity	3		22	0.312175		14.6469	0.00249085	1	0.0517761	0.015894	,,
G-protein coupled acetylcholine receptor signaling pathway	5		76	0.520291		6.48277	0.00265183	1	0.0548144	0.0168267	,,,,
caveolin-mediated endocytosis	3		23	0.312175		14.0429	0.0028381	1	0.0583387	0.0177118	,,
5-phosphoribose 1-diphosphate biosynthetic process	3		23	0.312175		14.0429	0.0028381	1	0.0580164	0.0177118	,,
negative regulation of cAMP-dependent protein kinase activity	3		23	0.312175		14.0429	0.0028381	1	0.0576976	0.0177118	,,
retina homeostasis	8		193	0.832466		3.81557	0.00310451	1	0.0627688	0.0190516	,,,,,,,
formaldehyde catabolic process	2		7	0.208117		31.5652	0.00312648	1	0.0628694	0.0190516	,
positive regulation of glycoprotein metabolic process	2		7	0.208117		31.5652	0.00312648	1	0.0625296	0.0190516	,
pyruvate metabolic process	6		114	0.62435		5.04053	0.00315343	1	0.0627295	0.0190516	,,,,,
clathrin-dependent endocytosis	6		114	0.62435		5.04053	0.00315343	1	0.0623941	0.0190516	,,,,,
cell-substrate adhesion	6		114	0.62435		5.04053	0.00315343	1	0.0620622	0.0190516	,,,,,
scaRNA localization to Cajal body	3		24	0.312175		13.4867	0.0032137	1	0.0629136	0.019313	,,
Bergmann glial cell differentiation	4		49	0.416233		8.37148	0.00325706	1	0.063427	0.0194706	,,,
viral entry into host cell	6		116	0.62435		4.95455	0.00343629	1	0.0665668	0.0204344	,,,,,
actomyosin structure organization	7		155	0.728408		4.23071	0.00346744	1	0.0668205	0.0205123	,,,,,,
mitotic nuclear envelope reassembly	4		50	0.416233		8.20814	0.00350581	1	0.0672097	0.0205798	,,,
positive regulation of substrate adhesion-dependent cell spreading	8		197	0.832466		3.73859	0.0035151	1	0.0670405	0.0205798	,,,,,,,
ATP hydrolysis coupled proton transport	6		117	0.62435		4.91265	0.00358459	1	0.0680152	0.020879	,,,,,
negative regulation of axonogenesis	6		119	0.62435		4.83094	0.00389537	1	0.073535	0.0224589	,,,,,
Rac protein signal transduction	6		119	0.62435		4.83094	0.00389537	1	0.0731617	0.0224589	,,,,,
cell-matrix adhesion	16		598	1.66493		2.30654	0.00395216	1	0.0738535	0.0225756	,,,,,,,,,,,,,,,
Ras protein signal transduction	12		390	1.2487		2.71357	0.00403504	1	0.0750234	0.0225756	,,,,,,,,,,,
establishment of centrosome localization	3		26	0.312175		12.4969	0.00405271	1	0.0749752	0.0225756	,,
intra-Golgi vesicle-mediated transport	6		120	0.62435		4.7911	0.00405803	1	0.0747	0.0225756	,,,,,
protein localization to cell leading edge	2		8	0.208117		28.1527	0.00413425	1	0.0757264	0.0225756	,
actomyosin contractile ring assembly	2		8	0.208117		28.1527	0.00413425	1	0.0753533	0.0225756	,
regulation of Golgi inheritance	2		8	0.208117		28.1527	0.00413425	1	0.0749839	0.0225756	,
negative regulation of protein K48-linked deubiquitination	2		8	0.208117		28.1527	0.00413425	1	0.0746182	0.0225756	,
regulation of protein tyrosine kinase activity	2		8	0.208117		28.1527	0.00413425	1	0.0742559	0.0225756	,
negative regulation of ubiquitin-specific protease activity	2		8	0.208117		28.1527	0.00413425	1	0.0738972	0.0225756	,
negative regulation of nitrosative stress-induced intrinsic apoptotic signaling pathway	2		8	0.208117		28.1527	0.00413425	1	0.0735419	0.0225756	,
positive regulation of focal adhesion assembly	6		121	0.62435		4.75191	0.00422566	1	0.0748083	0.0229643	,,,,,
endodermal cell differentiation	7		161	0.728408		4.07426	0.00426747	1	0.0751887	0.0230811	,,,,,,
adherens junction assembly	4		53	0.416233		7.75423	0.00432875	1	0.075907	0.0233016	,,,
cerebral cortex development	11		345	1.14464		2.83482	0.00444464	1	0.0775715	0.0238126	,,,,,,,,,,
actin filament-based movement	5		86	0.520291		5.73976	0.00451679	1	0.0784607	0.0240855	,,,,
cell motility	6		123	0.62435		4.67542	0.00457617	1	0.0791208	0.0242882	,,,,,
vasodilation	4		54	0.416233		7.61388	0.0046296	1	0.0796722	0.0244574	,,,
apoptotic cell clearance	5		88	0.520291		5.61114	0.00497909	1	0.08529	0.0260624	,,,,
regulation of glycolytic process	3		28	0.312175		11.6424	0.00501308	1	0.0854765	0.0260624	,,
translational termination	3		28	0.312175		11.6424	0.00501308	1	0.0850844	0.0260624	,,
glycogen metabolic process	6		126	0.62435		4.5652	0.00514144	1	0.0868645	0.0260624	,,,,,
cell adhesion	45		2405	4.68262		1.5401	0.00518779	1	0.0872492	0.0260624	,,,,,,,,,,,,,,,,,,,,,,,,,,,,,,,,,,,,,,,,,,,,
binding of sperm to zona pellucida	7		167	0.728408		3.92896	0.00519973	1	0.0870542	0.0260624	,,,,,,
meiotic cytokinesis	2		9	0.208117		25.4061	0.00527166	1	0.087861	0.0260624	,
meiotic chromosome movement towards spindle pole	2		9	0.208117		25.4061	0.00527166	1	0.087467	0.0260624	,
skeletal muscle satellite cell migration	2		9	0.208117		25.4061	0.00527166	1	0.0870766	0.0260624	,
positive regulation of potassium ion import	2		9	0.208117		25.4061	0.00527166	1	0.0866895	0.0260624	,
UDP-glucose metabolic process	2		9	0.208117		25.4061	0.00527166	1	0.086306	0.0260624	,
angiotensin-activated signaling pathway involved in heart process	2		9	0.208117		25.4061	0.00527166	1	0.0859258	0.0260624	,
serine family amino acid biosynthetic process	2		9	0.208117		25.4061	0.00527166	1	0.0855489	0.0260624	,
regulation of interferon-gamma-mediated signaling pathway	4		56	0.416233		7.3479	0.00527281	1	0.0851938	0.0260624	,,,
G2/M transition of mitotic cell cycle	20		843	2.08117		2.01682	0.00527761	1	0.0849007	0.0260624	,,,,,,,,,,,,,,,,,,,
blood coagulation	22		962	2.28928		1.93403	0.0054144	1	0.0867241	0.0266222	,,,,,,,,,,,,,,,,,,,,,
apolipoprotein A-I-mediated signaling pathway	3		29	0.312175		11.2575	0.00554023	1	0.0883571	0.0268917	,,
positive regulation of vesicle fusion	3		29	0.312175		11.2575	0.00554023	1	0.0879779	0.0268917	,,
fructose 1,6-bisphosphate metabolic process	3		29	0.312175		11.2575	0.00554023	1	0.087602	0.0268917	,,
positive regulation of cellular protein catabolic process	4		57	0.416233		7.22175	0.0056157	1	0.0884174	0.0271234	,,,
cell proliferation	38		1960	3.95421		1.60356	0.00563572	1	0.0883567	0.0271234	,,,,,,,,,,,,,,,,,,,,,,,,,,,,,,,,,,,,,
regulation of angiogenesis	7		170	0.728408		3.86014	0.00571944	1	0.0892909	0.0274088	,,,,,,
Rho protein signal transduction	9		260	0.936524		3.14374	0.00574329	1	0.0892864	0.0274088	,,,,,,,,
positive regulation of peptidyl-tyrosine phosphorylation	13		461	1.35276		2.47011	0.0058217	1	0.0901268	0.0276667	,,,,,,,,,,,,
negative regulation of RNA splicing	3		30	0.312175		10.8973	0.00609939	1	0.0940323	0.0286271	,,
ribosomal small subunit export from nucleus	3		30	0.312175		10.8973	0.00609939	1	0.0936421	0.0286271	,,
positive regulation of mRNA binding	3		30	0.312175		10.8973	0.00609939	1	0.0932551	0.0286271	,,
response to calcium ion	11		362	1.14464		2.70215	0.00630638	1	0.0960231	0.0294768	,,,,,,,,,,
chaperone-mediated protein complex assembly	4		59	0.416233		6.98202	0.00634542	1	0.0962215	0.0295377	,,,
negative regulation of MDA-5 signaling pathway	2		10	0.208117		23.1478	0.00653533	1	0.0986968	0.0296916	,
diadenosine tetraphosphate biosynthetic process	2		10	0.208117		23.1478	0.00653533	1	0.0982956	0.0296916	,
late endosomal microautophagy	2		10	0.208117		23.1478	0.00653533	1	0.0978977	0.0296916	,
'de novo' AMP biosynthetic process	2		10	0.208117		23.1478	0.00653533	1	0.0975029	0.0296916	,
regulation of melanocyte differentiation	2		10	0.208117		23.1478	0.00653533	1	0.0971114	0.0296916	,
negative regulation of blood vessel endothelial cell proliferation involved in sprouting angiogenesis	2		10	0.208117		23.1478	0.00653533	1	0.0967229	0.0296916	,
cellular response to indole-3-methanol	3		31	0.312175		10.5594	0.00669104	1	0.0986329	0.0301068	,,
osteoclast development	3		31	0.312175		10.5594	0.00669104	1	0.0982415	0.0301068	,,
virion assembly	4		60	0.416233		6.86803	0.00673276	1	0.0984632	0.0301068	,,,
actin crosslink formation	4		60	0.416233		6.86803	0.00673276	1	0.0980756	0.0301068	,,,
negative regulation of focal adhesion assembly	5		95	0.520291		5.20305	0.00686119	1	0.0995545	0.0305608	,,,,
receptor-mediated endocytosis	17		693	1.76899		2.10633	0.00704127	1	0.101768	0.0312404	,,,,,,,,,,,,,,,,
membrane tubulation	4		61	0.416233		6.7577	0.00713542	1	0.102728	0.0313297	,,,
endocytic recycling	6		135	0.62435		4.26364	0.00714414	1	0.102455	0.0313297	,,,,,
protein secretion	6		135	0.62435		4.26364	0.00714414	1	0.102059	0.0313297	,,,,,
response to hydrogen peroxide	9		270	0.936524		3.02784	0.00727864	1	0.103581	0.0317144	,,,,,,,,
CRD-mediated mRNA stabilization	3		32	0.312175		10.2418	0.00731563	1	0.103708	0.0317144	,,
negative regulation of transcription factor import into nucleus	3		32	0.312175		10.2418	0.00731563	1	0.103312	0.0317144	,,
RNA secondary structure unwinding	8		224	0.832466		3.29046	0.0074881	1	0.105346	0.032133	,,,,,,,
microvillus assembly	4		62	0.416233		6.65086	0.00755364	1	0.105865	0.032133	,,,
DNA replication-dependent nucleosome assembly	4		62	0.416233		6.65086	0.00755364	1	0.105466	0.032133	,,,
cellular response to X-ray	4		62	0.416233		6.65086	0.00755364	1	0.105069	0.032133	,,,
layer formation in cerebral cortex	4		62	0.416233		6.65086	0.00755364	1	0.104676	0.032133	,,,
response to organic substance	6		137	0.62435		4.20196	0.00765627	1	0.105702	0.0321351	,,,,,
protein import into nucleus, translocation	6		137	0.62435		4.20196	0.00765627	1	0.105309	0.0321351	,,,,,
muscle cell cellular homeostasis	5		98	0.520291		5.04578	0.00780218	1	0.106919	0.0321351	,,,,
interaction with symbiont	2		11	0.208117		21.2582	0.00792194	1	0.108159	0.0321351	,
regulation of lymphocyte migration	2		11	0.208117		21.2582	0.00792194	1	0.107762	0.0321351	,
cellular heat acclimation	2		11	0.208117		21.2582	0.00792194	1	0.107367	0.0321351	,
endonucleolytic cleavage to generate mature 3'-end of SSU-rRNA from (SSU-rRNA, 5.8S rRNA, LSU-rRNA)	2		11	0.208117		21.2582	0.00792194	1	0.106975	0.0321351	,
protein localization to membrane raft	2		11	0.208117		21.2582	0.00792194	1	0.106586	0.0321351	,
glyoxylate cycle	2		11	0.208117		21.2582	0.00792194	1	0.1062	0.0321351	,
xylulose biosynthetic process	2		11	0.208117		21.2582	0.00792194	1	0.105817	0.0321351	,
response to antipsychotic drug	2		11	0.208117		21.2582	0.00792194	1	0.105436	0.0321351	,
positive regulation of sodium ion export from cell	2		11	0.208117		21.2582	0.00792194	1	0.105058	0.0321351	,
urate biosynthetic process	2		11	0.208117		21.2582	0.00792194	1	0.104683	0.0321351	,
negative regulation of receptor-mediated endocytosis	3		33	0.312175		9.94277	0.00797359	1	0.10499	0.0321719	,,
cellular response to low-density lipoprotein particle stimulus	4		63	0.416233		6.54735	0.00798767	1	0.104803	0.0321719	,,,
regulation of endocytosis	7		182	0.728408		3.60736	0.00819338	1	0.107122	0.0327719	,,,,,,
negative regulation of endothelial cell proliferation	6		139	0.62435		4.14204	0.00819434	1	0.106757	0.0327719	,,,,,
negative regulation of p38MAPK cascade	3		34	0.312175		9.66071	0.00866528	1	0.112497	0.034413	,,
positive regulation of skeletal muscle tissue development	3		34	0.312175		9.66071	0.00866528	1	0.112103	0.034413	,,
regulation of filopodium assembly	4		65	0.416233		6.34969	0.00890408	1	0.114791	0.0352381	,,,
regulation of cell size	5		102	0.520291		4.85031	0.00919136	1	0.118083	0.036178	,,,,
response to axon injury	6		143	0.62435		4.02718	0.00935103	1	0.119719	0.036178	,,,,,
regulation of axon extension	4		66	0.416233		6.25527	0.00938691	1	0.119764	0.036178	,,,
negative regulation of monocyte chemotactic protein-1 production	3		35	0.312175		9.39421	0.00939107	1	0.119405	0.036178	,,
negative regulation of hyaluronan biosynthetic process	2		12	0.208117		19.6538	0.00942824	1	0.119467	0.036178	,
translation reinitiation	2		12	0.208117		19.6538	0.00942824	1	0.11906	0.036178	,
pentose-phosphate shunt, oxidative branch	2		12	0.208117		19.6538	0.00942824	1	0.118655	0.036178	,
pentose biosynthetic process	2		12	0.208117		19.6538	0.00942824	1	0.118253	0.036178	,
positive regulation of lipase activity	2		12	0.208117		19.6538	0.00942824	1	0.117853	0.036178	,
endosome organization	6		145	0.62435		3.97211	0.00997102	1	0.124218	0.0381319	,,,,,
positive regulation of actin filament depolymerization	3		36	0.312175		9.14201	0.0101513	1	0.126039	0.0384331	,,
UTP biosynthetic process	3		36	0.312175		9.14201	0.0101513	1	0.125618	0.0384331	,,
positive regulation of toll-like receptor 3 signaling pathway	3		36	0.312175		9.14201	0.0101513	1	0.125199	0.0384331	,,
hemidesmosome assembly	5		106	0.520291		4.66941	0.0107421	1	0.132046	0.0403597	,,,,
adherens junction organization	7		192	0.728408		3.42069	0.0107928	1	0.13223	0.0403597	,,,,,,
cellular response to osmotic stress	3		37	0.312175		8.90301	0.0109462	1	0.133666	0.0403597	,,
ERBB signaling pathway	3		37	0.312175		8.90301	0.0109462	1	0.133227	0.0403597	,,
positive regulation by host of viral genome replication	3		37	0.312175		8.90301	0.0109462	1	0.13279	0.0403597	,,
CTP biosynthetic process	3		37	0.312175		8.90301	0.0109462	1	0.132356	0.0403597	,,
endosome to melanosome transport	3		37	0.312175		8.90301	0.0109462	1	0.131925	0.0403597	,,
methylglyoxal metabolic process	2		13	0.208117		18.2746	0.011051	1	0.132756	0.0403597	,
fructose biosynthetic process	2		13	0.208117		18.2746	0.011051	1	0.132326	0.0403597	,
negative regulation of rubidium ion transmembrane transporter activity	2		13	0.208117		18.2746	0.011051	1	0.131899	0.0403597	,
glucose transmembrane transport	2		13	0.208117		18.2746	0.011051	1	0.131475	0.0403597	,
negative regulation of transforming growth factor beta receptor signaling pathway	9		290	0.936524		2.81992	0.0112689	1	0.133637	0.0410234	,,,,,,,,
RNA processing	11		394	1.14464		2.48338	0.0114194	1	0.13499	0.0414385	,,,,,,,,,,
cellular potassium ion homeostasis	4		70	0.416233		5.9041	0.0114874	1	0.135361	0.0415526	,,,
regulation of type I interferon-mediated signaling pathway	5		108	0.520291		4.58393	0.0115807	1	0.136027	0.0416248	,,,,
maturation of SSU-rRNA from tricistronic rRNA transcript (SSU-rRNA, 5.8S rRNA, LSU-rRNA)	5		108	0.520291		4.58393	0.0115807	1	0.135597	0.0416248	,,,,
regulation of cell communication by electrical coupling involved in cardiac conduction	3		38	0.312175		8.67618	0.0117761	1	0.13745	0.0417981	,,
positive regulation of protein localization to early endosome	3		38	0.312175		8.67618	0.0117761	1	0.137017	0.0417981	,,
protein hexamerization	3		38	0.312175		8.67618	0.0117761	1	0.136588	0.0417981	,,
actin filament severing	3		38	0.312175		8.67618	0.0117761	1	0.136161	0.0417981	,,
cellular response to insulin stimulus	12		450	1.2487		2.35276	0.0118555	1	0.136652	0.0419489	,,,,,,,,,,,
positive regulation of DNA replication	7		196	0.728408		3.35132	0.0119839	1	0.137704	0.0422627	,,,,,,
relaxation of cardiac muscle	4		71	0.416233		5.82238	0.0120558	1	0.138101	0.0422627	,,,
negative regulation of substrate adhesion-dependent cell spreading	4		71	0.416233		5.82238	0.0120558	1	0.137675	0.0422627	,,,
angiogenesis	25		1225	2.60146		1.71526	0.0124041	1	0.141216	0.0424673	,,,,,,,,,,,,,,,,,,,,,,,,
cyclic nucleotide catabolic process	1		1	0.104058		80.127	0.0124642	1	0.141465	0.0424673
negative regulation of activation of membrane attack complex	1		1	0.104058		80.127	0.0124642	1	0.141032	0.0424673
negative regulation of guanyl-nucleotide exchange factor activity	1		1	0.104058		80.127	0.0124642	1	0.140602	0.0424673
glucocorticoid catabolic process	1		1	0.104058		80.127	0.0124642	1	0.140175	0.0424673
regulation of interleukin-1 production	1		1	0.104058		80.127	0.0124642	1	0.13975	0.0424673
negative regulation of nitric-oxide synthase activity	3		39	0.312175		8.46062	0.0126412	1	0.141306	0.0424673	,,
pore complex assembly	3		39	0.312175		8.46062	0.0126412	1	0.140881	0.0424673	,,
ATF6-mediated unfolded protein response	3		39	0.312175		8.46062	0.0126412	1	0.140458	0.0424673	,,
positive regulation of protein processing in phagocytic vesicle	2		14	0.208117		17.0763	0.0127872	1	0.141654	0.0424673	,
actin filament branching	2		14	0.208117		17.0763	0.0127872	1	0.141232	0.0424673	,
glyceraldehyde-3-phosphate biosynthetic process	2		14	0.208117		17.0763	0.0127872	1	0.140811	0.0424673	,
regulation of extracellular exosome assembly	2		14	0.208117		17.0763	0.0127872	1	0.140393	0.0424673	,
UDP-glucuronate biosynthetic process	2		14	0.208117		17.0763	0.0127872	1	0.139978	0.0424673	,
positive regulation of viral process	2		14	0.208117		17.0763	0.0127872	1	0.139565	0.0424673	,
iron ion import	2		14	0.208117		17.0763	0.0127872	1	0.139155	0.0424673	,
adhesion of symbiont to host	2		14	0.208117		17.0763	0.0127872	1	0.138747	0.0424673	,
receptor internalization involved in canonical Wnt signaling pathway	2		14	0.208117		17.0763	0.0127872	1	0.138341	0.0424673	,
positive regulation of axonogenesis	5		111	0.520291		4.46142	0.0129202	1	0.139373	0.042784	,,,,
cellular response to exogenous dsRNA	4		73	0.416233		5.66555	0.013246	1	0.142471	0.0434261	,,,
endosomal transport	9		298	0.936524		2.74454	0.0132554	1	0.14216	0.0434261	,,,,,,,,
epidermal growth factor receptor signaling pathway	9		298	0.936524		2.74454	0.0132554	1	0.141749	0.0434261	,,,,,,,,
positive regulation of cell-substrate adhesion	7		200	0.728408		3.28471	0.0132671	1	0.141464	0.0434261	,,,,,,
cell junction assembly	4		74	0.416233		5.59026	0.013868	1	0.147448	0.0448794	,,,
establishment or maintenance of epithelial cell apical/basal polarity	4		74	0.416233		5.59026	0.013868	1	0.147025	0.0448794	,,,
DNA replication-independent nucleosome assembly	4		74	0.416233		5.59026	0.013868	1	0.146605	0.0448794	,,,
negative regulation of mRNA splicing, via spliceosome	5		113	0.520291		4.38332	0.0138691	1	0.146199	0.0448794	,,,,
positive regulation of peptidyl-serine phosphorylation	11		406	1.14464		2.41021	0.0139918	1	0.147073	0.0451477	,,,,,,,,,,
homeostasis of number of cells within a tissue	6		157	0.62435		3.67091	0.0143161	1	0.150055	0.045788	,,,,,
regulation of bone resorption	3		41	0.312175		8.06012	0.0144779	1	0.151323	0.045788	,,
positive regulation of podosome assembly	3		41	0.312175		8.06012	0.0144779	1	0.150896	0.045788	,,
wound healing, spreading of cells	4		75	0.416233		5.51694	0.0145083	1	0.150789	0.045788	,,,
response to alkaloid	2		15	0.208117		16.0254	0.0146336	1	0.151665	0.045788	,
SNARE complex disassembly	2		15	0.208117		16.0254	0.0146336	1	0.151241	0.045788	,
Schwann cell development	2		15	0.208117		16.0254	0.0146336	1	0.15082	0.045788	,
assembly of large subunit precursor of preribosome	2		15	0.208117		16.0254	0.0146336	1	0.150401	0.045788	,
central nervous system vasculogenesis	2		15	0.208117		16.0254	0.0146336	1	0.149985	0.045788	,
regulation of Rap protein signal transduction	2		15	0.208117		16.0254	0.0146336	1	0.14957	0.045788	,
positive regulation of cellular protein localization	2		15	0.208117		16.0254	0.0146336	1	0.149158	0.045788	,
osteoclast differentiation	5		115	0.520291		4.30791	0.0148637	1	0.151088	0.0463802	,,,,
negative regulation of MAPK cascade	4		76	0.416233		5.44553	0.015167	1	0.153748	0.0471969	,,,
malate metabolic process	3		42	0.312175		7.87376	0.0154498	1	0.156187	0.0479455	,,
cellular response to glucose starvation	6		161	0.62435		3.58041	0.0160179	1	0.161488	0.0495729	,,,,,
response to drug	30		1578	3.12175		1.58554	0.0163514	1	0.164402	0.0499737	,,,,,,,,,,,,,,,,,,,,,,,,,,,,,
positive regulation of ruffle assembly	3		43	0.312175		7.69582	0.0164576	1	0.165022	0.0499737	,,
NADH metabolic process	3		43	0.312175		7.69582	0.0164576	1	0.164576	0.0499737	,,
axon guidance	17		762	1.76899		1.91591	0.0165646	1	0.1652	0.0499737	,,,,,,,,,,,,,,,,
sequestering of calcium ion	2		16	0.208117		15.0964	0.0165874	1	0.164982	0.0499737	,
positive regulation of endocytic recycling	2		16	0.208117		15.0964	0.0165874	1	0.164539	0.0499737	,
'de novo' UMP biosynthetic process	2		16	0.208117		15.0964	0.0165874	1	0.1641	0.0499737	,
second-messenger-mediated signaling	2		16	0.208117		15.0964	0.0165874	1	0.163662	0.0499737	,
caveola assembly	2		16	0.208117		15.0964	0.0165874	1	0.163227	0.0499737	,
negative regulation of bicellular tight junction assembly	2		16	0.208117		15.0964	0.0165874	1	0.162794	0.0499737	,
response to ethanol	13		530	1.35276		2.14929	0.017	1	0.166402	0.0510815	,,,,,,,,,,,,
ruffle organization	4		79	0.416233		5.24196	0.017255	1	0.168453	0.0517109	,,,
microtubule-based movement	12		475	1.2487		2.22926	0.0173729	1	0.169157	0.0519271	,,,,,,,,,,,
cellular response to calcium ion	8		261	0.832466		2.82622	0.0174819	1	0.169771	0.0520377	,,,,,,,
astral microtubule organization	3		44	0.312175		7.52574	0.0175015	1	0.169517	0.0520377	,,
protein export from nucleus	6		165	0.62435		3.49426	0.0178545	1	0.172484	0.0528798	,,,,,
purine-containing compound salvage	4		80	0.416233		5.17744	0.0179888	1	0.173329	0.0528798	,,,
cellular response to drug	10		368	1.04058		2.44124	0.018241	1	0.175303	0.0528798	,,,,,,,,,
rhythmic process	9		315	0.936524		2.597	0.0183228	1	0.175633	0.0528798	,,,,,,,,
negative regulation of endocytosis	3		45	0.312175		7.36303	0.0185815	1	0.177652	0.0528798	,,
establishment of integrated proviral latency	3		45	0.312175		7.36303	0.0185815	1	0.177194	0.0528798	,,
cellular response to vitamin D	3		45	0.312175		7.36303	0.0185815	1	0.176739	0.0528798	,,
protein localization to lysosome	2		17	0.208117		14.2692	0.0186454	1	0.176892	0.0528798	,
negative regulation of smooth muscle cell chemotaxis	2		17	0.208117		14.2692	0.0186454	1	0.17644	0.0528798	,
establishment of protein localization to endoplasmic reticulum membrane	2		17	0.208117		14.2692	0.0186454	1	0.17599	0.0528798	,
negative regulation of neuroblast proliferation	2		17	0.208117		14.2692	0.0186454	1	0.175542	0.0528798	,
phenylalanyl-tRNA aminoacylation	2		17	0.208117		14.2692	0.0186454	1	0.175096	0.0528798	,
negative regulation of mesenchymal to epithelial transition involved in metanephros morphogenesis	2		17	0.208117		14.2692	0.0186454	1	0.174653	0.0528798	,
T cell antigen processing and presentation	2		17	0.208117		14.2692	0.0186454	1	0.174212	0.0528798	,
response to L-ascorbic acid	2		17	0.208117		14.2692	0.0186454	1	0.173773	0.0528798	,
establishment of apical/basal cell polarity	2		17	0.208117		14.2692	0.0186454	1	0.173337	0.0528798	,
positive regulation of telomerase RNA reverse transcriptase activity	2		17	0.208117		14.2692	0.0186454	1	0.172902	0.0528798	,
ameboidal-type cell migration	2		17	0.208117		14.2692	0.0186454	1	0.17247	0.0528798	,
protein methylation	4		81	0.416233		5.11449	0.0187417	1	0.172928	0.0528798	,,,
actin polymerization or depolymerization	4		81	0.416233		5.11449	0.0187417	1	0.172498	0.0528798	,,,
positive regulation of cell migration	21		1019	2.18522		1.74744	0.0187624	1	0.17226	0.0528798	,,,,,,,,,,,,,,,,,,,,
positive regulation of cell adhesion	8		265	0.832466		2.78376	0.0189568	1	0.173614	0.0532853	,,,,,,,
actin filament organization	9		317	0.936524		2.58068	0.0190001	1	0.173581	0.0532853	,,,,,,,,
mRNA splicing, via spliceosome	22		1085	2.28928		1.71503	0.0193432	1	0.17628	0.0541138	,,,,,,,,,,,,,,,,,,,,,
GTP biosynthetic process	3		46	0.312175		7.20719	0.0196976	1	0.179069	0.0547011	,,
proteasome assembly	3		46	0.312175		7.20719	0.0196976	1	0.17863	0.0547011	,,
formation of translation preinitiation complex	3		46	0.312175		7.20719	0.0196976	1	0.178194	0.0547011	,,
axon extension	5		124	0.520291		3.99836	0.0199285	1	0.179842	0.0552073	,,,,
cap-dependent translational initiation	2		18	0.208117		13.5279	0.0208049	1	0.187294	0.0559849	,
pinocytosis	2		18	0.208117		13.5279	0.0208049	1	0.18684	0.0559849	,
S-adenosylhomocysteine catabolic process	2		18	0.208117		13.5279	0.0208049	1	0.186387	0.0559849	,
negative regulation of lipoprotein metabolic process	2		18	0.208117		13.5279	0.0208049	1	0.185937	0.0559849	,
glucose 1-phosphate metabolic process	2		18	0.208117		13.5279	0.0208049	1	0.185489	0.0559849	,
regulation of cell junction assembly	2		18	0.208117		13.5279	0.0208049	1	0.185043	0.0559849	,
L-serine biosynthetic process	2		18	0.208117		13.5279	0.0208049	1	0.1846	0.0559849	,
response to gonadotropin	2		18	0.208117		13.5279	0.0208049	1	0.184158	0.0559849	,
regulation of glycogen catabolic process	2		18	0.208117		13.5279	0.0208049	1	0.183718	0.0559849	,
response to salt stress	3		47	0.312175		7.05782	0.02085	1	0.183678	0.0559849	,,
apical protein localization	3		47	0.312175		7.05782	0.02085	1	0.183242	0.0559849	,,
regulation of vascular permeability	3		47	0.312175		7.05782	0.02085	1	0.182808	0.0559849	,,
membrane budding	3		47	0.312175		7.05782	0.02085	1	0.182376	0.0559849	,,
negative regulation of anoikis	4		84	0.416233		4.93451	0.0211163	1	0.184269	0.0564959	,,,
positive regulation of G1/S transition of mitotic cell cycle	5		126	0.520291		3.93551	0.0211895	1	0.184473	0.0564959	,,,,
hydrogen peroxide catabolic process	5		126	0.520291		3.93551	0.0211895	1	0.18404	0.0564959	,,,,
regulation of cellular response to heat	11		433	1.14464		2.26035	0.0213538	1	0.185033	0.0568007	,,,,,,,,,,
early endosome to Golgi transport	3		48	0.312175		6.91452	0.0220386	1	0.190521	0.0583489	,,
blood vessel endothelial cell migration	3		48	0.312175		6.91452	0.0220386	1	0.190077	0.0583489	,,
regulation of nitric-oxide synthase activity	5		128	0.520291		3.87462	0.0225014	1	0.193617	0.0593011	,,,,
cellular response to nerve growth factor stimulus	6		174	0.62435		3.31481	0.0225027	1	0.193178	0.0593011	,,,,,
ERBB2 signaling pathway	7		223	0.728408		2.94782	0.0226071	1	0.193626	0.0593773	,,,,,,
circadian regulation of gene expression	8		275	0.832466		2.68299	0.0230291	1	0.196784	0.0593773	,,,,,,,
response to antineoplastic agent	2		19	0.208117		12.8599	0.0230629	1	0.196619	0.0593773	,
negative regulation of myosin-light-chain-phosphatase activity	2		19	0.208117		12.8599	0.0230629	1	0.196167	0.0593773	,
negative regulation of exosomal secretion	2		19	0.208117		12.8599	0.0230629	1	0.195717	0.0593773	,
NADPH regeneration	2		19	0.208117		12.8599	0.0230629	1	0.19527	0.0593773	,
astrocyte cell migration	2		19	0.208117		12.8599	0.0230629	1	0.194824	0.0593773	,
neutrophil homeostasis	2		19	0.208117		12.8599	0.0230629	1	0.19438	0.0593773	,
mitotic spindle midzone assembly	3		49	0.312175		6.77691	0.0232635	1	0.195625	0.0593773	,,
regulation of cell adhesion mediated by integrin	3		49	0.312175		6.77691	0.0232635	1	0.195181	0.0593773	,,
regulation of cardiac muscle cell action potential involved in regulation of contraction	3		49	0.312175		6.77691	0.0232635	1	0.19474	0.0593773	,,
positive regulation of intracellular estrogen receptor signaling pathway	3		49	0.312175		6.77691	0.0232635	1	0.1943	0.0593773	,,
regulation of fibroblast migration	3		49	0.312175		6.77691	0.0232635	1	0.193862	0.0593773	,,
positive regulation of lamellipodium morphogenesis	3		49	0.312175		6.77691	0.0232635	1	0.193427	0.0593773	,,
multivesicular body assembly	5		130	0.520291		3.81557	0.0238648	1	0.197981	0.0599949	,,,,
autophagy	14		616	1.45682		1.97965	0.0242769	1	0.20095	0.0599949	,,,,,,,,,,,,,
synaptic vesicle transport	3		50	0.312175		6.64468	0.0245246	1	0.202547	0.0599949	,,
ERK1 and ERK2 cascade	4		88	0.416233		4.71336	0.024557	1	0.202363	0.0599949	,,,
cellular response to prostaglandin E stimulus	4		88	0.416233		4.71336	0.024557	1	0.201913	0.0599949	,,,
cellular calcium ion homeostasis	11		443	1.14464		2.20947	0.0246973	1	0.202616	0.0599949	,,,,,,,,,,
keratinocyte activation	1		2	0.104058		55.4726	0.0247731	1	0.202789	0.0599949
neuronal-glial interaction involved in cerebral cortex radial glia guided migration	1		2	0.104058		55.4726	0.0247731	1	0.202341	0.0599949
leukocyte differentiation	1		2	0.104058		55.4726	0.0247731	1	0.201896	0.0599949
negative regulation of formation of translation preinitiation complex	1		2	0.104058		55.4726	0.0247731	1	0.201452	0.0599949
actin-myosin filament sliding	1		2	0.104058		55.4726	0.0247731	1	0.20101	0.0599949
membrane raft localization	1		2	0.104058		55.4726	0.0247731	1	0.20057	0.0599949
nucleus accumbens development	1		2	0.104058		55.4726	0.0247731	1	0.200132	0.0599949
positive regulation of collagen binding	1		2	0.104058		55.4726	0.0247731	1	0.199696	0.0599949
hypotonic response	1		2	0.104058		55.4726	0.0247731	1	0.199262	0.0599949
glutaminyl-tRNA aminoacylation	1		2	0.104058		55.4726	0.0247731	1	0.19883	0.0599949
chaperone-mediated autophagy translocation complex disassembly	1		2	0.104058		55.4726	0.0247731	1	0.1984	0.0599949
negative regulation of muscle cell differentiation	1		2	0.104058		55.4726	0.0247731	1	0.197971	0.0599949
regulation of protein import	1		2	0.104058		55.4726	0.0247731	1	0.197544	0.0599949
fumarate metabolic process	1		2	0.104058		55.4726	0.0247731	1	0.19712	0.0599949
protein targeting to lysosome involved in chaperone-mediated autophagy	1		2	0.104058		55.4726	0.0247731	1	0.196697	0.0599949
chaperone-mediated protein transport involved in chaperone-mediated autophagy	1		2	0.104058		55.4726	0.0247731	1	0.196275	0.0599949
negative regulation of fibril organization	1		2	0.104058		55.4726	0.0247731	1	0.195856	0.0599949
leucine import	1		2	0.104058		55.4726	0.0247731	1	0.195438	0.0599949
dendrite morphogenesis	7		228	0.728408		2.88353	0.0251181	1	0.197739	0.0606483	,,,,,,
positive regulation of cyclic-nucleotide phosphodiesterase activity	2		20	0.208117		12.2547	0.0254168	1	0.199665	0.0606483	,
negative regulation of low-density lipoprotein particle receptor biosynthetic process	2		20	0.208117		12.2547	0.0254168	1	0.199242	0.0606483	,
glycerol ether metabolic process	2		20	0.208117		12.2547	0.0254168	1	0.19882	0.0606483	,
dendritic spine maintenance	2		20	0.208117		12.2547	0.0254168	1	0.198401	0.0606483	,
negative regulation of interleukin-8 secretion	2		20	0.208117		12.2547	0.0254168	1	0.197983	0.0606483	,
regulation of synaptic vesicle priming	2		20	0.208117		12.2547	0.0254168	1	0.197567	0.0606483	,
regulation of protein stability	9		334	0.936524		2.44982	0.0255064	1	0.197848	0.0607346	,,,,,,,,
protein kinase A signaling	3		51	0.312175		6.51751	0.025822	1	0.199877	0.0612293	,,
regulation of keratinocyte differentiation	3		51	0.312175		6.51751	0.025822	1	0.19946	0.0612293	,,
protein oligomerization	9		335	0.936524		2.44253	0.0259326	1	0.199897	0.0613636	,,,,,,,,
ER-associated ubiquitin-dependent protein catabolic process	9		336	0.936524		2.43529	0.0263639	1	0.202799	0.0622544	,,,,,,,,
positive regulation of cholesterol storage	3		52	0.312175		6.39512	0.0271555	1	0.208455	0.0635948	,,
nucleoside triphosphate biosynthetic process	3		52	0.312175		6.39512	0.0271555	1	0.208023	0.0635948	,,
sodium ion export from cell	3		52	0.312175		6.39512	0.0271555	1	0.207593	0.0635948	,,
cellular protein complex localization	3		52	0.312175		6.39512	0.0271555	1	0.207165	0.0635948	,,
regulation of exocytosis	4		91	0.416233		4.56008	0.0273468	1	0.208196	0.0636491	,,,
inactivation of MAPK activity	4		91	0.416233		4.56008	0.0273468	1	0.207768	0.0636491	,,,
neurotrophin TRK receptor signaling pathway	4		91	0.416233		4.56008	0.0273468	1	0.207343	0.0636491	,,,
ubiquitin-independent protein catabolic process via the multivesicular body sorting pathway	2		21	0.208117		11.704	0.0278637	1	0.210829	0.0640644	,
protein import into mitochondrial outer membrane	2		21	0.208117		11.704	0.0278637	1	0.210399	0.0640644	,
formation of cytoplasmic translation initiation complex	2		21	0.208117		11.704	0.0278637	1	0.209971	0.0640644	,
cellular hyperosmotic salinity response	2		21	0.208117		11.704	0.0278637	1	0.209544	0.0640644	,
regulation of axon regeneration	2		21	0.208117		11.704	0.0278637	1	0.209119	0.0640644	,
polyamine metabolic process	2		21	0.208117		11.704	0.0278637	1	0.208695	0.0640644	,
cellular response to growth factor stimulus	7		234	0.728408		2.80998	0.0283754	1	0.212099	0.0650452	,,,,,,
cell cycle	22		1129	2.28928		1.64827	0.0284048	1	0.21189	0.0650452	,,,,,,,,,,,,,,,,,,,,,
negative regulation of proteasomal ubiquitin-dependent protein catabolic process	5		137	0.520291		3.62238	0.0290506	1	0.216272	0.0663903	,,,,
Golgi to plasma membrane transport	4		93	0.416233		4.46331	0.0293074	1	0.217746	0.0667088	,,,
blastocyst development	4		93	0.416233		4.46331	0.0293074	1	0.21731	0.0667088	,,,
negative regulation of gene expression	15		693	1.56087		1.8755	0.0293816	1	0.217424	0.0667438	,,,,,,,,,,,,,,
positive regulation of gene expression	27		1460	2.80957		1.54908	0.0294512	1	0.217504	0.0667684	,,,,,,,,,,,,,,,,,,,,,,,,,,
UDP-N-acetylglucosamine biosynthetic process	3		54	0.312175		6.16362	0.0299307	1	0.220605	0.0667886	,,
stress granule disassembly	2		22	0.208117		11.2006	0.0304009	1	0.223625	0.0667886	,
tetrahydrofolate biosynthetic process	2		22	0.208117		11.2006	0.0304009	1	0.223182	0.0667886	,
glucose 6-phosphate metabolic process	2		22	0.208117		11.2006	0.0304009	1	0.22274	0.0667886	,
S-adenosylmethionine cycle	2		22	0.208117		11.2006	0.0304009	1	0.222299	0.0667886	,
chaperone cofactor-dependent protein refolding	2		22	0.208117		11.2006	0.0304009	1	0.221861	0.0667886	,
positive regulation of cell projection organization	2		22	0.208117		11.2006	0.0304009	1	0.221424	0.0667886	,
positive regulation of Golgi to plasma membrane protein transport	2		22	0.208117		11.2006	0.0304009	1	0.220989	0.0667886	,
regulation of skeletal muscle cell differentiation	2		22	0.208117		11.2006	0.0304009	1	0.220556	0.0667886	,
positive regulation of cell adhesion molecule production	2		22	0.208117		11.2006	0.0304009	1	0.220124	0.0667886	,
regulation of viral genome replication	2		22	0.208117		11.2006	0.0304009	1	0.219694	0.0667886	,
glutamine transport	2		22	0.208117		11.2006	0.0304009	1	0.219266	0.0667886	,
monocarboxylic acid transport	2		22	0.208117		11.2006	0.0304009	1	0.218839	0.0667886	,
receptor-mediated virion attachment to host cell	2		22	0.208117		11.2006	0.0304009	1	0.218415	0.0667886	,
dsRNA transport	2		22	0.208117		11.2006	0.0304009	1	0.217991	0.0667886	,
cortical cytoskeleton organization	2		22	0.208117		11.2006	0.0304009	1	0.21757	0.0667886	,
regulation of centrosome duplication	4		95	0.416233		4.37057	0.0313492	1	0.223923	0.068739	,,,
triglyceride metabolic process	5		141	0.520291		3.52052	0.0323093	1	0.230336	0.0707077	,,,,
cell-cell junction assembly	4		96	0.416233		4.32562	0.0324007	1	0.230543	0.0707712	,,,
positive regulation of mitochondrial depolarization	3		56	0.312175		5.9483	0.0328495	1	0.233289	0.0709097	,,
regulation of GTPase activity	8		295	0.832466		2.50186	0.0329449	1	0.233518	0.0709097	,,,,,,,
cerebral cortex radial glia guided migration	2		23	0.208117		10.7387	0.033026	1	0.233645	0.0709097	,
regulation of cytokine biosynthetic process	2		23	0.208117		10.7387	0.033026	1	0.233199	0.0709097	,
purine nucleotide metabolic process	2		23	0.208117		10.7387	0.033026	1	0.232754	0.0709097	,
alpha-beta T cell differentiation	2		23	0.208117		10.7387	0.033026	1	0.232312	0.0709097	,
negative regulation of hydrogen peroxide-induced neuron death	2		23	0.208117		10.7387	0.033026	1	0.231871	0.0709097	,
mammary gland involution	2		23	0.208117		10.7387	0.033026	1	0.231432	0.0709097	,
lactate metabolic process	2		23	0.208117		10.7387	0.033026	1	0.230995	0.0709097	,
T cell proliferation	4		97	0.416233		4.2816	0.0334726	1	0.233677	0.0713336	,,,
negative regulation of extrinsic apoptotic signaling pathway	7		243	0.728408		2.70644	0.0337784	1	0.235368	0.0713336	,,,,,,
negative regulation of cell adhesion	6		192	0.62435		3.00606	0.0340947	1	0.237125	0.0713336	,,,,,
positive regulation of protein localization to plasma membrane	3		57	0.312175		5.84618	0.0343625	1	0.238539	0.0713336	,,
actin filament network formation	3		57	0.312175		5.84618	0.0343625	1	0.238092	0.0713336	,,
hair follicle placode formation	3		57	0.312175		5.84618	0.0343625	1	0.237647	0.0713336	,,
ribosomal large subunit biogenesis	4		98	0.416233		4.23846	0.034565	1	0.238601	0.0713336	,,,
response to ischemia	5		144	0.520291		3.44781	0.0348971	1	0.240446	0.0713336	,,,,
extracellular matrix organization	23		1220	2.39334		1.59106	0.0350156	1	0.240814	0.0713336	,,,,,,,,,,,,,,,,,,,,,,
organelle transport along microtubule	2		24	0.208117		10.3134	0.0357362	1	0.245313	0.0713336	,
negative regulation of establishment of protein localization to mitochondrion	2		24	0.208117		10.3134	0.0357362	1	0.244859	0.0713336	,
regulation of nucleocytoplasmic transport	2		24	0.208117		10.3134	0.0357362	1	0.244406	0.0713336	,
negative regulation of mitochondrial outer membrane permeabilization involved in apoptotic signaling pathway	2		24	0.208117		10.3134	0.0357362	1	0.243955	0.0713336	,
cytoplasmic sequestering of protein	2		24	0.208117		10.3134	0.0357362	1	0.243506	0.0713336	,
protein to membrane docking	2		24	0.208117		10.3134	0.0357362	1	0.243059	0.0713336	,
regulation of blood vessel endothelial cell migration	2		24	0.208117		10.3134	0.0357362	1	0.242613	0.0713336	,
leukocyte tethering or rolling	3		58	0.312175		5.74751	0.035911	1	0.243353	0.0713336	,,
response to virus	12		530	1.2487		1.99846	0.0360036	1	0.243534	0.0713336	,,,,,,,,,,,
response to amino acid	5		146	0.520291		3.40098	0.0366914	1	0.247734	0.0713336	,,,,
platelet formation	4		100	0.416233		4.15474	0.0368112	1	0.24809	0.0713336	,,,
positive regulation of 1-phosphatidylinositol 4-kinase activity	1		3	0.104058		42.4202	0.0369289	1	0.24843	0.0713336
pericyte cell differentiation	1		3	0.104058		42.4202	0.0369289	1	0.24798	0.0713336
notochord cell development	1		3	0.104058		42.4202	0.0369289	1	0.24753	0.0713336
protein depolymerization	1		3	0.104058		42.4202	0.0369289	1	0.247083	0.0713336
detoxification of cadmium ion	1		3	0.104058		42.4202	0.0369289	1	0.246637	0.0713336
positive regulation of centriole elongation	1		3	0.104058		42.4202	0.0369289	1	0.246192	0.0713336
response to ammonium ion	1		3	0.104058		42.4202	0.0369289	1	0.24575	0.0713336
myeloid cell apoptotic process	1		3	0.104058		42.4202	0.0369289	1	0.245308	0.0713336
intestinal epithelial cell migration	1		3	0.104058		42.4202	0.0369289	1	0.244869	0.0713336
peptide antigen assembly with MHC class I protein complex	1		3	0.104058		42.4202	0.0369289	1	0.244431	0.0713336
positive regulation of histone modification	1		3	0.104058		42.4202	0.0369289	1	0.243994	0.0713336
regulation of histone ubiquitination	1		3	0.104058		42.4202	0.0369289	1	0.243559	0.0713336
uridine catabolic process	1		3	0.104058		42.4202	0.0369289	1	0.243126	0.0713336
negative regulation of cortisol secretion	1		3	0.104058		42.4202	0.0369289	1	0.242694	0.0713336
epithelial cell proliferation involved in lung morphogenesis	1		3	0.104058		42.4202	0.0369289	1	0.242264	0.0713336
regulation of SMAD protein complex assembly	1		3	0.104058		42.4202	0.0369289	1	0.241835	0.0713336
viral replication complex formation and maintenance	1		3	0.104058		42.4202	0.0369289	1	0.241408	0.0713336
positive regulation of deoxyribonuclease activity	1		3	0.104058		42.4202	0.0369289	1	0.240982	0.0713336
regulation of oxidative stress-induced neuron intrinsic apoptotic signaling pathway	1		3	0.104058		42.4202	0.0369289	1	0.240558	0.0713336
protein modification process	1		3	0.104058		42.4202	0.0369289	1	0.240135	0.0713336
positive regulation of myofibroblast differentiation	1		3	0.104058		42.4202	0.0369289	1	0.239714	0.0713336
pyridoxal 5'-phosphate salvage	1		3	0.104058		42.4202	0.0369289	1	0.239294	0.0713336
cellular localization	1		3	0.104058		42.4202	0.0369289	1	0.238875	0.0713336
positive regulation of phosphatidylcholine biosynthetic process	1		3	0.104058		42.4202	0.0369289	1	0.238459	0.0713336
positive regulation of erythrocyte aggregation	1		3	0.104058		42.4202	0.0369289	1	0.238043	0.0713336
positive regulation of cell volume	1		3	0.104058		42.4202	0.0369289	1	0.237629	0.0713336
stromal-epithelial cell signaling involved in prostate gland development	1		3	0.104058		42.4202	0.0369289	1	0.237217	0.0713336
positive regulation of voltage-gated sodium channel activity	1		3	0.104058		42.4202	0.0369289	1	0.236805	0.0713336
clathrin-dependent extracellular exosome endocytosis	1		3	0.104058		42.4202	0.0369289	1	0.236396	0.0713336
hydroxyproline transport	1		3	0.104058		42.4202	0.0369289	1	0.235987	0.0713336
glucosamine catabolic process	1		3	0.104058		42.4202	0.0369289	1	0.235581	0.0713336
adenine biosynthetic process	1		3	0.104058		42.4202	0.0369289	1	0.235175	0.0713336
convergent extension involved in somitogenesis	1		3	0.104058		42.4202	0.0369289	1	0.234771	0.0713336
multi-organism membrane organization	1		3	0.104058		42.4202	0.0369289	1	0.234368	0.0713336
menstrual cycle phase	1		3	0.104058		42.4202	0.0369289	1	0.233967	0.0713336
negative regulation of canonical Wnt signaling pathway involved in controlling type B pancreatic cell proliferation	1		3	0.104058		42.4202	0.0369289	1	0.233567	0.0713336
import into cell	1		3	0.104058		42.4202	0.0369289	1	0.233169	0.0713336
threonine transport	1		3	0.104058		42.4202	0.0369289	1	0.232771	0.0713336
negative regulation of zinc ion transmembrane import	1		3	0.104058		42.4202	0.0369289	1	0.232375	0.0713336
membrane repolarization	3		59	0.312175		5.65212	0.0374949	1	0.235537	0.0723041	,,
mesodermal cell differentiation	4		101	0.416233		4.1141	0.0379651	1	0.238086	0.0729629	,,,
bone resorption	4		101	0.416233		4.1141	0.0379651	1	0.237683	0.0729629	,,,
cellular response to testosterone stimulus	2		25	0.208117		9.92049	0.038529	1	0.240806	0.0730579	,
spindle localization	2		25	0.208117		9.92049	0.038529	1	0.2404	0.0730579	,
aspartate metabolic process	2		25	0.208117		9.92049	0.038529	1	0.239996	0.0730579	,
response to hydroperoxide	2		25	0.208117		9.92049	0.038529	1	0.239592	0.0730579	,
positive regulation of extracellular exosome assembly	2		25	0.208117		9.92049	0.038529	1	0.23919	0.0730579	,
nucleoside metabolic process	2		25	0.208117		9.92049	0.038529	1	0.23879	0.0730579	,
protein import	2		25	0.208117		9.92049	0.038529	1	0.23839	0.0730579	,
cellular macromolecule biosynthetic process	2		25	0.208117		9.92049	0.038529	1	0.237992	0.0730579	,
cellular hypotonic response	3		60	0.312175		5.55984	0.039114	1	0.241203	0.0738456	,,
skeletal muscle tissue development	7		251	0.728408		2.62061	0.0391209	1	0.240844	0.0738456	,,,,,,
positive regulation of neuron death	4		102	0.416233		4.07426	0.0391395	1	0.240558	0.0738456	,,,
mRNA transport	6		199	0.62435		2.90098	0.0394793	1	0.242245	0.0743632	,,,,,
long-term synaptic potentiation	6		200	0.62435		2.88656	0.04029	1	0.24681	0.0755979	,,,,,
negative regulation of osteoclast differentiation	4		103	0.416233		4.03517	0.0403345	1	0.246674	0.0755979	,,,
regulation of cytoskeleton organization	4		103	0.416233		4.03517	0.0403345	1	0.246267	0.0755979	,,,
CENP-A containing nucleosome assembly	5		150	0.520291		3.31103	0.0404474	1	0.246549	0.0756846	,,,,
lipid biosynthetic process	3		61	0.312175		5.47052	0.040768	1	0.248095	0.0761591	,,
response to organic cyclic compound	6		201	0.62435		2.87229	0.0411112	1	0.249772	0.076674	,,,,,
craniofacial suture morphogenesis	2		26	0.208117		9.55644	0.0414021	1	0.251127	0.076838	,
establishment of neuroblast polarity	2		26	0.208117		9.55644	0.0414021	1	0.250716	0.076838	,
positive regulation of sprouting angiogenesis	2		26	0.208117		9.55644	0.0414021	1	0.250307	0.076838	,
phospholipid translocation	4		104	0.416233		3.99684	0.04155	1	0.250791	0.0769868	,,,
positive regulation of catalytic activity	5		152	0.520291		3.26782	0.0424095	1	0.255562	0.0781572	,,,,
PERK-mediated unfolded protein response	3		62	0.312175		5.38403	0.0424569	1	0.255432	0.0781572	,,
synaptic vesicle fusion to presynaptic active zone membrane	3		62	0.312175		5.38403	0.0424569	1	0.255017	0.0781572	,,
response to amine	3		62	0.312175		5.38403	0.0424569	1	0.254604	0.0781572	,,
IRE1-mediated unfolded protein response	8		311	0.832466		2.37366	0.0427167	1	0.255747	0.07838	,,,,,,,
regulation of growth	7		256	0.728408		2.56967	0.0427254	1	0.255386	0.07838	,,,,,,
cellular response to epidermal growth factor stimulus	6		203	0.62435		2.84417	0.0427849	1	0.25533	0.07838	,,,,,
glutathione derivative biosynthetic process	4		106	0.416233		3.9223	0.0440427	1	0.262412	0.0783905	,,,
protein localization to cell surface	4		106	0.416233		3.9223	0.0440427	1	0.261991	0.0783905	,,,
myeloid cell homeostasis	3		63	0.312175		5.30023	0.0441804	1	0.262387	0.0783905	,,
purine nucleotide catabolic process	3		63	0.312175		5.30023	0.0441804	1	0.261967	0.0783905	,,
neuroblast proliferation	3		63	0.312175		5.30023	0.0441804	1	0.261548	0.0783905	,,
positive regulation of phosphoprotein phosphatase activity	3		63	0.312175		5.30023	0.0441804	1	0.26113	0.0783905	,,
positive regulation of NIK/NF-kappaB signaling	3		63	0.312175		5.30023	0.0441804	1	0.260714	0.0783905	,,
negative regulation of cholesterol biosynthetic process	2		27	0.208117		9.21816	0.0443528	1	0.261314	0.0783905	,
pentose-phosphate shunt, non-oxidative branch	2		27	0.208117		9.21816	0.0443528	1	0.260899	0.0783905	,
positive regulation of endopeptidase activity	2		27	0.208117		9.21816	0.0443528	1	0.260485	0.0783905	,
glycerophospholipid biosynthetic process	2		27	0.208117		9.21816	0.0443528	1	0.260072	0.0783905	,
substrate-dependent cell migration	2		27	0.208117		9.21816	0.0443528	1	0.259661	0.0783905	,
high-density lipoprotein particle clearance	2		27	0.208117		9.21816	0.0443528	1	0.25925	0.0783905	,
mammary gland epithelial cell proliferation	2		27	0.208117		9.21816	0.0443528	1	0.258841	0.0783905	,
proton transport	4		107	0.416233		3.88607	0.0453199	1	0.264069	0.0783905	,,,
positive regulation of protein localization to nucleus	4		107	0.416233		3.88607	0.0453199	1	0.263653	0.0783905	,,,
positive regulation of protein autophosphorylation	4		107	0.416233		3.88607	0.0453199	1	0.26324	0.0783905	,,,
low-density lipoprotein particle clearance	3		64	0.312175		5.219	0.0459382	1	0.266413	0.0783905	,,
mitochondrial fragmentation involved in apoptotic process	3		64	0.312175		5.219	0.0459382	1	0.265996	0.0783905	,,
valyl-tRNA aminoacylation	2		28	0.208117		8.90301	0.047379	1	0.27391	0.0783905	,
calcium ion export	2		28	0.208117		8.90301	0.047379	1	0.273482	0.0783905	,
tubulin complex assembly	2		28	0.208117		8.90301	0.047379	1	0.273056	0.0783905	,
Golgi reassembly	2		28	0.208117		8.90301	0.047379	1	0.272632	0.0783905	,
positive regulation of cell growth	10		434	1.04058		2.07106	0.0476272	1	0.273635	0.0783905	,,,,,,,,,
regulation of protein complex assembly	3		65	0.312175		5.14023	0.0477302	1	0.273801	0.0783905	,,
fatty acid homeostasis	3		65	0.312175		5.14023	0.0477302	1	0.273377	0.0783905	,,
positive regulation of apoptotic process	30		1738	3.12175		1.43968	0.0485549	1	0.277671	0.0783905	,,,,,,,,,,,,,,,,,,,,,,,,,,,,,
negative regulation of neuron apoptotic process	14		680	1.45682		1.79367	0.0485797	1	0.277384	0.0783905	,,,,,,,,,,,,,
regulation of synaptic plasticity	5		158	0.520291		3.1447	0.0486349	1	0.277271	0.0783905	,,,,
positive regulation of telomerase activity	5		158	0.520291		3.1447	0.0486349	1	0.276845	0.0783905	,,,,
lipophagy	1		4	0.104058		34.3402	0.0489332	1	0.278115	0.0783905
microtubule cytoskeleton organization involved in establishment of planar polarity	1		4	0.104058		34.3402	0.0489332	1	0.277688	0.0783905
positive regulation of macrophage migration	1		4	0.104058		34.3402	0.0489332	1	0.277263	0.0783905
epidermal growth factor catabolic process	1		4	0.104058		34.3402	0.0489332	1	0.276839	0.0783905
multi-organism intracellular transport	1		4	0.104058		34.3402	0.0489332	1	0.276417	0.0783905
negative regulation of lipid transport across blood brain barrier	1		4	0.104058		34.3402	0.0489332	1	0.275995	0.0783905
regulation of developmental process	1		4	0.104058		34.3402	0.0489332	1	0.275575	0.0783905
negative regulation of phospholipid efflux	1		4	0.104058		34.3402	0.0489332	1	0.275156	0.0783905
negative regulation of dendritic spine maintenance	1		4	0.104058		34.3402	0.0489332	1	0.274739	0.0783905
regulation of exocyst assembly	1		4	0.104058		34.3402	0.0489332	1	0.274323	0.0783905
regulation of exocyst localization	1		4	0.104058		34.3402	0.0489332	1	0.273907	0.0783905
negative regulation of postsynaptic membrane organization	1		4	0.104058		34.3402	0.0489332	1	0.273494	0.0783905
D-gluconate metabolic process	1		4	0.104058		34.3402	0.0489332	1	0.273081	0.0783905
behavioral response to nutrient	1		4	0.104058		34.3402	0.0489332	1	0.27267	0.0783905
positive regulation of postsynaptic membrane organization	1		4	0.104058		34.3402	0.0489332	1	0.27226	0.0783905
mitotic cell cycle process	1		4	0.104058		34.3402	0.0489332	1	0.271851	0.0783905
steroid hormone receptor complex assembly	1		4	0.104058		34.3402	0.0489332	1	0.271444	0.0783905
cerebellar granular layer structural organization	1		4	0.104058		34.3402	0.0489332	1	0.271037	0.0783905
constitutive protein ectodomain proteolysis	1		4	0.104058		34.3402	0.0489332	1	0.270632	0.0783905
regulation of meiotic cell cycle process involved in oocyte maturation	1		4	0.104058		34.3402	0.0489332	1	0.270228	0.0783905
ESCRT III complex assembly	1		4	0.104058		34.3402	0.0489332	1	0.269825	0.0783905
positive regulation of cell migration by vascular endothelial growth factor signaling pathway	1		4	0.104058		34.3402	0.0489332	1	0.269424	0.0783905
meiotic spindle elongation	1		4	0.104058		34.3402	0.0489332	1	0.269024	0.0783905
adenosine biosynthetic process	1		4	0.104058		34.3402	0.0489332	1	0.268624	0.0783905
hydroxylysine biosynthetic process	1		4	0.104058		34.3402	0.0489332	1	0.268226	0.0783905
actin rod assembly	1		4	0.104058		34.3402	0.0489332	1	0.26783	0.0783905
asparagine metabolic process	1		4	0.104058		34.3402	0.0489332	1	0.267434	0.0783905
inactivation of MAPKK activity	1		4	0.104058		34.3402	0.0489332	1	0.26704	0.0783905
mevalonate transport	1		4	0.104058		34.3402	0.0489332	1	0.266646	0.0783905
regulation of cell maturation	1		4	0.104058		34.3402	0.0489332	1	0.266254	0.0783905
positive regulation of lipid transport across blood brain barrier	1		4	0.104058		34.3402	0.0489332	1	0.265863	0.0783905
protein localization to bicellular tight junction	1		4	0.104058		34.3402	0.0489332	1	0.265473	0.0783905
negative regulation of presynaptic membrane organization	1		4	0.104058		34.3402	0.0489332	1	0.265085	0.0783905
maintenance of location in cell	1		4	0.104058		34.3402	0.0489332	1	0.264697	0.0783905
atrioventricular canal morphogenesis	1		4	0.104058		34.3402	0.0489332	1	0.264311	0.0783905
positive regulation of cyclin-dependent protein serine/threonine kinase activity involved in G2/M transition of mitotic cell cycle	1		4	0.104058		34.3402	0.0489332	1	0.263925	0.0783905
nitric oxide storage	1		4	0.104058		34.3402	0.0489332	1	0.263541	0.0783905
negative regulation of leukocyte proliferation	1		4	0.104058		34.3402	0.0489332	1	0.263158	0.0783905
negative regulation of peptidyl-tyrosine autophosphorylation	1		4	0.104058		34.3402	0.0489332	1	0.262776	0.0783905
regulation of macrophage apoptotic process	1		4	0.104058		34.3402	0.0489332	1	0.262395	0.0783905
translocation of peptides or proteins into host cell cytoplasm	1		4	0.104058		34.3402	0.0489332	1	0.262016	0.0783905
threonine metabolic process	1		4	0.104058		34.3402	0.0489332	1	0.261637	0.0783905
gamma-aminobutyric acid metabolic process	1		4	0.104058		34.3402	0.0489332	1	0.26126	0.0783905
negative regulation of mitochondrial membrane permeability	1		4	0.104058		34.3402	0.0489332	1	0.260883	0.0783905
regulation of lysosome organization	1		4	0.104058		34.3402	0.0489332	1	0.260508	0.0783905
regulation of endosome organization	1		4	0.104058		34.3402	0.0489332	1	0.260133	0.0783905
regulation of leukocyte mediated cytotoxicity	1		4	0.104058		34.3402	0.0489332	1	0.25976	0.0783905
regulation of peptidase activity	1		4	0.104058		34.3402	0.0489332	1	0.259388	0.0783905
response to sulfur dioxide	1		4	0.104058		34.3402	0.0489332	1	0.259017	0.0783905
chromosome passenger complex localization to kinetochore	1		4	0.104058		34.3402	0.0489332	1	0.258647	0.0783905
negative regulation of matrix metallopeptidase secretion	1		4	0.104058		34.3402	0.0489332	1	0.258278	0.0783905
negative regulation of lipoprotein lipid oxidation	1		4	0.104058		34.3402	0.0489332	1	0.25791	0.0783905
positive regulation of neutrophil apoptotic process	1		4	0.104058		34.3402	0.0489332	1	0.257543	0.0783905
lipid transport involved in lipid storage	1		4	0.104058		34.3402	0.0489332	1	0.257177	0.0783905
myoblast migration involved in skeletal muscle regeneration	1		4	0.104058		34.3402	0.0489332	1	0.256813	0.0783905
negative regulation of T cell migration	1		4	0.104058		34.3402	0.0489332	1	0.256449	0.0783905
positive regulation of transferase activity	1		4	0.104058		34.3402	0.0489332	1	0.256086	0.0783905
negative regulation of glial cell migration	1		4	0.104058		34.3402	0.0489332	1	0.255724	0.0783905
positive regulation of fibril organization	1		4	0.104058		34.3402	0.0489332	1	0.255364	0.0783905
removal of superoxide radicals	3		66	0.312175		5.06379	0.0495561	1	0.25825	0.0792764	,,
fatty acid biosynthetic process	6		211	0.62435		2.73697	0.0499037	1	0.259696	0.0797203	,,,,,
histone H4-R3 methylation	2		29	0.208117		8.60869	0.0504781	1	0.262316	0.0798518	,
macropinocytosis	2		29	0.208117		8.60869	0.0504781	1	0.261948	0.0798518	,
peripheral nervous system axon regeneration	2		29	0.208117		8.60869	0.0504781	1	0.261581	0.0798518	,
response to inorganic substance	2		29	0.208117		8.60869	0.0504781	1	0.261216	0.0798518	,
pyrimidine nucleotide metabolic process	2		29	0.208117		8.60869	0.0504781	1	0.260851	0.0798518	,
podosome assembly	2		29	0.208117		8.60869	0.0504781	1	0.260487	0.0798518	,
negative regulation of lipid transport	2		29	0.208117		8.60869	0.0504781	1	0.260124	0.0798518	,
DNA metabolic process	4		111	0.416233		3.74759	0.0506333	1	0.260561	0.0799859	,,,
phosphorylation	5		160	0.520291		3.1057	0.0508234	1	0.261176	0.080092	,,,,
cellular response to heat	6		212	0.62435		2.72413	0.0508416	1	0.260907	0.080092	,,,,,
nuclear migration	3		67	0.312175		4.9896	0.0514156	1	0.263487	0.0801901	,,
cell aging	5		161	0.520291		3.08656	0.0519389	1	0.265801	0.0801901	,,,,
peptide catabolic process	4		112	0.416233		3.7145	0.0520127	1	0.265811	0.0801901	,,,
nucleocytoplasmic transport	4		112	0.416233		3.7145	0.0520127	1	0.265444	0.0801901	,,,
tricarboxylic acid cycle	5		162	0.520291		3.06765	0.0530687	1	0.27046	0.0801901	,,,,
cellular amino acid metabolic process	5		162	0.520291		3.06765	0.0530687	1	0.270088	0.0801901	,,,,
maturation of LSU-rRNA	3		68	0.312175		4.91754	0.0533085	1	0.270936	0.0801901	,,
positive regulation of extrinsic apoptotic signaling pathway via death domain receptors	3		68	0.312175		4.91754	0.0533085	1	0.270564	0.0801901	,,
negative regulation of inflammatory response to antigenic stimulus	2		30	0.208117		8.33321	0.053648	1	0.271915	0.0801901	,
positive regulation of protein kinase A signaling	2		30	0.208117		8.33321	0.053648	1	0.271543	0.0801901	,
inositol metabolic process	2		30	0.208117		8.33321	0.053648	1	0.271172	0.0801901	,
negative regulation of neurotransmitter secretion	2		30	0.208117		8.33321	0.053648	1	0.270802	0.0801901	,
tissue remodeling	2		30	0.208117		8.33321	0.053648	1	0.270433	0.0801901	,
positive regulation of interleukin-1 alpha secretion	2		30	0.208117		8.33321	0.053648	1	0.270065	0.0801901	,
L-methionine biosynthetic process from methylthioadenosine	2		30	0.208117		8.33321	0.053648	1	0.269698	0.0801901	,
protein peptidyl-prolyl isomerization	2		30	0.208117		8.33321	0.053648	1	0.269332	0.0801901	,
isocitrate metabolic process	2		30	0.208117		8.33321	0.053648	1	0.268967	0.0801901	,
positive regulation of Arp2/3 complex-mediated actin nucleation	2		30	0.208117		8.33321	0.053648	1	0.268603	0.0801901	,
animal organ regeneration	7		270	0.728408		2.43704	0.0539331	1	0.269665	0.0801901	,,,,,,
regulation of mitophagy	5		163	0.520291		3.04897	0.0542127	1	0.270698	0.0801901	,,,,
protein complex assembly	14		692	1.45682		1.76262	0.0545462	1	0.271996	0.0801901	,,,,,,,,,,,,,
regulation of cardiac conduction	7		271	0.728408		2.42809	0.0547975	1	0.272881	0.0801901	,,,,,,
membrane protein ectodomain proteolysis	4		114	0.416233		3.65004	0.0548326	1	0.272689	0.0801901	,,,
mitotic cell cycle	5		164	0.520291		3.03052	0.0553709	1	0.274996	0.0801901	,,,,
retina development in camera-type eye	7		272	0.728408		2.41921	0.0556705	1	0.276114	0.0801901	,,,,,,
cellular response to oxidative stress	8		329	0.832466		2.24429	0.0558001	1	0.276386	0.0801901	,,,,,,,
response to isolation stress	2		31	0.208117		8.07482	0.0568865	1	0.28139	0.0801901	,
positive regulation of beta-amyloid formation	2		31	0.208117		8.07482	0.0568865	1	0.281015	0.0801901	,
methionine metabolic process	2		31	0.208117		8.07482	0.0568865	1	0.28064	0.0801901	,
peptidyl-arginine methylation	2		31	0.208117		8.07482	0.0568865	1	0.280266	0.0801901	,
positive regulation of potassium ion transmembrane transporter activity	2		31	0.208117		8.07482	0.0568865	1	0.279893	0.0801901	,
regulation of anion transport	2		31	0.208117		8.07482	0.0568865	1	0.279522	0.0801901	,
midbrain dopaminergic neuron differentiation	2		31	0.208117		8.07482	0.0568865	1	0.279151	0.0801901	,
calcium ion transport	9		389	0.936524		2.10455	0.0570138	1	0.279405	0.0801901	,,,,,,,,
regulation of G1/S transition of mitotic cell cycle	3		70	0.312175		4.77951	0.0571933	1	0.279914	0.0801901	,,
actin filament capping	3		70	0.312175		4.77951	0.0571933	1	0.279544	0.0801901	,,
regulation of neuronal synaptic plasticity	3		70	0.312175		4.77951	0.0571933	1	0.279176	0.0801901	,,
carbohydrate metabolic process	13		634	1.35276		1.79742	0.057267	1	0.279167	0.0801901	,,,,,,,,,,,,
negative regulation of catalytic activity	4		116	0.416233		3.58778	0.0577334	1	0.281071	0.0801901	,,,
positive regulation of GTPase activity	13		636	1.35276		1.79178	0.0583999	1	0.283942	0.0801901	,,,,,,,,,,,,
dendritic spine development	3		71	0.312175		4.71336	0.0591846	1	0.287379	0.0801901	,,
protein maturation	3		71	0.312175		4.71336	0.0591846	1	0.287003	0.0801901	,,
negative regulation of actin filament polymerization	3		71	0.312175		4.71336	0.0591846	1	0.286627	0.0801901	,,
cerebellar Purkinje cell layer development	3		71	0.312175		4.71336	0.0591846	1	0.286252	0.0801901	,,
receptor clustering	4		117	0.416233		3.55744	0.0592141	1	0.286021	0.0801901	,,,
positive regulation of cell-matrix adhesion	4		117	0.416233		3.55744	0.0592141	1	0.285648	0.0801901	,,,
proteolysis	19		1026	1.97711		1.57953	0.0593137	1	0.285756	0.0801901	,,,,,,,,,,,,,,,,,,
positive regulation of protein insertion into mitochondrial membrane involved in apoptotic signaling pathway	6		221	0.62435		2.61382	0.0597661	1	0.287561	0.0801901	,,,,,
positive regulation of cell proliferation	37		2263	3.85016		1.35359	0.0598237	1	0.287465	0.0801901	,,,,,,,,,,,,,,,,,,,,,,,,,,,,,,,,,,,,
response to insulin	7		277	0.728408		2.37573	0.0601648	1	0.288728	0.0801901	,,,,,,
regulation of epithelial cell migration	2		32	0.208117		7.83197	0.0601912	1	0.288481	0.0801901	,
negative regulation of platelet-derived growth factor receptor signaling pathway	2		32	0.208117		7.83197	0.0601912	1	0.288108	0.0801901	,
positive regulation of dendritic cell chemotaxis	2		32	0.208117		7.83197	0.0601912	1	0.287736	0.0801901	,
regulation of establishment of endothelial barrier	2		32	0.208117		7.83197	0.0601912	1	0.287364	0.0801901	,
liver development	9		394	0.936524		2.07793	0.0607499	1	0.289658	0.0801901	,,,,,,,,
plasma membrane raft assembly	1		5	0.104058		28.8457	0.0607881	1	0.289467	0.0801901
maintenance of protein localization in endoplasmic reticulum	1		5	0.104058		28.8457	0.0607881	1	0.289095	0.0801901
regulation of ATF6-mediated unfolded protein response	1		5	0.104058		28.8457	0.0607881	1	0.288724	0.0801901
positive regulation of myeloid leukocyte cytokine production involved in immune response	1		5	0.104058		28.8457	0.0607881	1	0.288354	0.0801901
mating plug formation	1		5	0.104058		28.8457	0.0607881	1	0.287984	0.0801901
cerebellar granular layer morphogenesis	1		5	0.104058		28.8457	0.0607881	1	0.287616	0.0801901
negative regulation of RNA-directed RNA polymerase activity	1		5	0.104058		28.8457	0.0607881	1	0.287249	0.0801901
positive regulation of cell junction assembly	1		5	0.104058		28.8457	0.0607881	1	0.286883	0.0801901
fibril organization	1		5	0.104058		28.8457	0.0607881	1	0.286517	0.0801901
regulation of protein folding in endoplasmic reticulum	1		5	0.104058		28.8457	0.0607881	1	0.286153	0.0801901
seminal vesicle epithelium development	1		5	0.104058		28.8457	0.0607881	1	0.285789	0.0801901
stress response to metal ion	1		5	0.104058		28.8457	0.0607881	1	0.285426	0.0801901
protein localization to plasma membrane raft	1		5	0.104058		28.8457	0.0607881	1	0.285064	0.0801901
interleukin-2-mediated signaling pathway	1		5	0.104058		28.8457	0.0607881	1	0.284704	0.0801901
positive regulation of skeletal muscle contraction by regulation of release of sequestered calcium ion	1		5	0.104058		28.8457	0.0607881	1	0.284344	0.0801901
positive regulation of T cell mediated immune response to tumor cell	1		5	0.104058		28.8457	0.0607881	1	0.283985	0.0801901
isotype switching to IgG isotypes	1		5	0.104058		28.8457	0.0607881	1	0.283627	0.0801901
clathrin coat disassembly	1		5	0.104058		28.8457	0.0607881	1	0.283269	0.0801901
methylglyoxal biosynthetic process	1		5	0.104058		28.8457	0.0607881	1	0.282913	0.0801901
negative regulation of intracellular steroid hormone receptor signaling pathway	1		5	0.104058		28.8457	0.0607881	1	0.282558	0.0801901
B cell cytokine production	1		5	0.104058		28.8457	0.0607881	1	0.282203	0.0801901
negative regulation of Rho-dependent protein serine/threonine kinase activity	1		5	0.104058		28.8457	0.0607881	1	0.281849	0.0801901
regulation of PERK-mediated unfolded protein response	1		5	0.104058		28.8457	0.0607881	1	0.281497	0.0801901
positive regulation of prostaglandin secretion involved in immune response	1		5	0.104058		28.8457	0.0607881	1	0.281145	0.0801901
glyoxal metabolic process	1		5	0.104058		28.8457	0.0607881	1	0.280794	0.0801901
ER-nucleus signaling pathway	1		5	0.104058		28.8457	0.0607881	1	0.280444	0.0801901
positive regulation of L-dopa biosynthetic process	1		5	0.104058		28.8457	0.0607881	1	0.280095	0.0801901
positive regulation of L-dopa decarboxylase activity	1		5	0.104058		28.8457	0.0607881	1	0.279746	0.0801901
neural crest cell fate commitment	1		5	0.104058		28.8457	0.0607881	1	0.279399	0.0801901
[truncated: 2,895 more rows]

## Sheet: WM266-4 Gene details
Name of data set: WM266-4
No. of mapped items: 936
[truncated: 941 more rows]

## Sheet: WM266-4 Cellular component
Analysis:Cellular component
[truncated: 644 more rows]

[truncated: 10 more sheets: WM266-4 Molecular function, WM266-4 Biological process, WM793 Gene details, WM793 Cellular component, WM793 Molecular function, WM793 Biological process, WM1205Lu Gene details, WM1205Lu Cellular component, WM1205Lu Molecular function, WM1205Lu Biological process]
